# Supplementary material for: Clinical and Biological Significances of FBLN5 in Gastric Cancer
Source: MDPI journal article supplement (doi:10.3390/cancers15020553), 2023-01-16
Supplement: s1 [file s1]

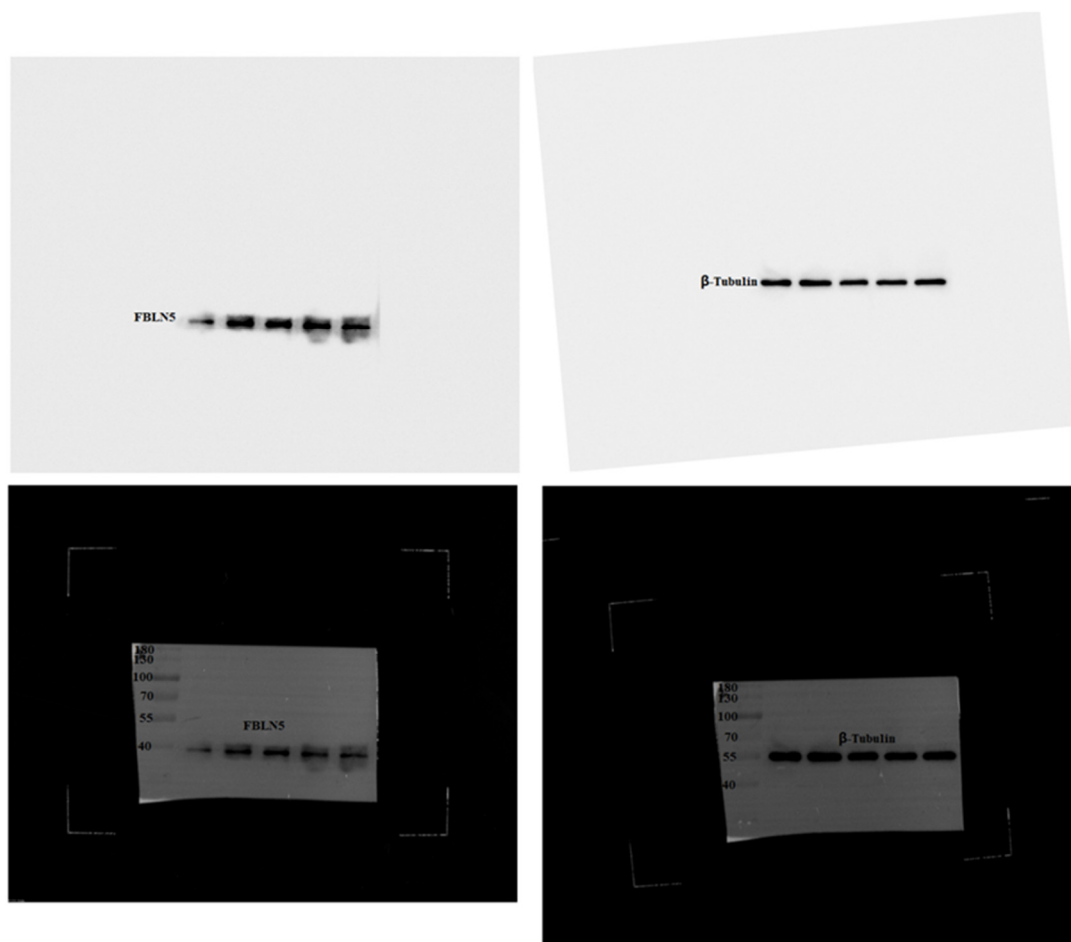

**Figure S1.** Western blot figures of FBLN5. The molecular weight range of the protein pre dye Marker we used is 10-180 kDa, which is 180 kDa, 130 kDa, 100 kDa, 70 kDa, 55 kDa, 40 kDa, 35 kDa, 25 kDa, 15 kDa and 10 kDa respectively.

Densitometry readings/intensity ratio of each band are as follow:

| <b>GES</b>  | <b>AGS</b>  | <b>BGC-823</b> | <b>HGC-27</b> | <b>MKN-28</b> |
|-------------|-------------|----------------|---------------|---------------|
| 0.546245597 | 1.173976061 | 1.308010586    | 1.585782484   | 1.276616819   |
| 0.737717207 | 1.656891701 | 1.354611092    | 1.427532515   | 1.940585495   |
| 0.929335259 | 1.575110203 | 2.057093426    | 1.074953206   | 1.308508457   |

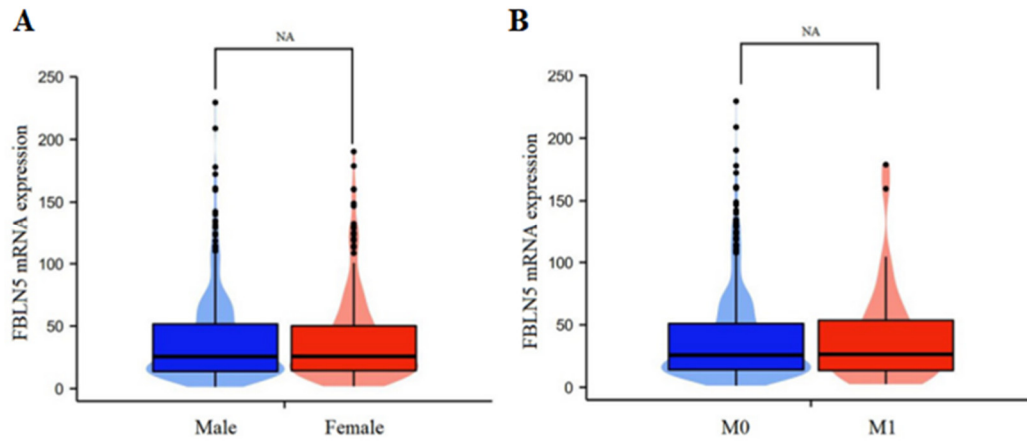

**Figure S2.** Correlation analysis of the expression level of FBLN5 mRNA with sex and M stage. (A) Correlation analysis between FBLN5 mRNA expression levels and sex ( $P>0.05$ ) (B) Correlation analysis between FBLN5 mRNA expression levels and M stage ( $P>0.05$ ).

**Table S1.** Baseline patient clinicopathologic characteristics.

| Characteristics   | Low FBLN5 expression | High FBLN5 expression | P value |
|-------------------|----------------------|-----------------------|---------|
| n                 | 322                  | 322                   |         |
| T stage, n (%)    |                      |                       | < 0.001 |
| T2                | 66 (10.4%)           | 39 (6.1%)             |         |
| T1                | 30 (4.7%)            | 9 (1.4%)              |         |
| T4                | 68 (10.7%)           | 86 (13.5%)            |         |
| T3                | 157 (24.7%)          | 181 (28.5%)           |         |
| N stage, n (%)    |                      |                       | < 0.001 |
| N0                | 104 (16.6%)          | 72 (11.5%)            |         |
| N1                | 69 (11%)             | 58 (9.3%)             |         |
| N3                | 80 (12.8%)           | 124 (19.8%)           |         |
| N2                | 62 (9.9%)            | 57 (9.1%)             |         |
| M stage, n (%)    |                      |                       | 0.9657  |
| M0                | 289 (46.3%)          | 293 (47%)             |         |
| M1                | 21 (3.4%)            | 21 (3.4%)             |         |
| pTNM stage, n (%) |                      |                       | < 0.001 |
| Stage1            | 66 (10.6%)           | 22 (3.5%)             |         |
| Stage4            | 29 (4.7%)            | 26 (4.2%)             |         |
| Stage3            | 138 (22.2%)          | 179 (28.8%)           |         |
| Stage2            | 82 (13.2%)           | 79 (12.7%)            |         |
| Gender, n (%)     |                      |                       | 0.8053  |
| Male              | 208 (32.3%)          | 205 (31.8%)           |         |
| Female            | 114 (17.7%)          | 117 (18.2%)           |         |
| Age, median (IQR) | 65 (56, 71)          | 62 (53, 69)           | < 0.05  |
