# Supplementary material for: Clinical and Biological Significances of FBLN5 in Gastric Cancer
Source: Cancers (Basel). 2023 Jan 16;15(2):553. doi: 10.3390/cancers15020553 (PMC9856449; doi:10.3390/cancers15020553)
Supplement: Supplementary file 1 [file cancers-15-00553-s001.zip]

Archive with 7 entries (7 files):
- cancers-2109226-supplementary.pdf
- Supplementary Table S2.xlsx
- Supplementary Table S3.xlsx
- Supplementary Table S4.xlsx
- Supplementary Table S5.xlsx
- Supplementary Table S6.xlsx
- Supplementary Table S7.xlsx
