# Supplementary material for: Clinical and Biological Significances of FBLN5 in Gastric Cancer
Source: Cancers (Basel). 2023 Jan 16;15(2):553. doi: 10.3390/cancers15020553 (PMC9856449; doi:10.3390/cancers15020553)
Supplement: Supplementary file 1 [file cancers-15-00553-s001.zip › Supplementary Table S2.xlsx]

## Sheet: 0_filter (2)
Tag	logFC	AveExpr	t	P.Value	adj.P.Val	B
FBLN5	-47.9501	38.4153	-19.7382	1.66351e-64	6.42912e-60	136.021
RECK	-9.00703	9.13653	-19.298	2.19587e-62	4.24331e-58	131.182
CNRIP1	-11.086	11.6544	-18.5354	9.9611e-59	1.28325e-54	122.838
ATP8B2	-20.1991	21.3487	-18.0722	1.60934e-56	1.53054e-52	117.799
PDE1A	-7.03347	6.79698	-18.0383	2.33351e-56	1.53054e-52	117.431
A2M	-370.511	393.53	-18.0366	2.37612e-56	1.53054e-52	117.413
ERG	-7.59353	7.96697	-17.9875	4.06847e-56	2.24626e-52	116.88
FBXL7	-10.9581	10.5282	-17.9525	5.96721e-56	2.88276e-52	116.5
ZEB2	-8.43092	9.67879	-17.7966	3.27552e-55	1.40658e-51	114.813
IGFBP7	-929.195	921.517	-17.7456	5.7169e-55	2.07036e-51	114.261
CYP2U1	-5.08432	6.61214	-17.7358	6.36158e-55	2.07036e-51	114.155
EFEMP2	-27.9746	30.1742	-17.7348	6.42836e-55	2.07036e-51	114.145
VSTM4	-9.55775	9.201	-17.6844	1.11379e-54	3.31122e-51	113.6
FSTL1	-161.546	141.584	-17.677	1.20793e-54	3.33457e-51	113.52
C1S	-210.733	203.271	-17.6476	1.66464e-54	4.28899e-51	113.202
PLPP1	-49.1254	65.3396	-17.5813	3.42689e-54	8.27765e-51	112.486
ADAMTS10	-6.94425	7.0803	-17.5545	4.58757e-54	1.04294e-50	112.197
CYYR1	-16.0472	19.3018	-17.5405	5.34397e-54	1.14741e-50	112.046
QKI	-10.5666	14.3092	-17.4016	2.41781e-53	4.83774e-50	110.55
MAGI2-AS3	-5.50067	5.19812	-17.3984	2.50349e-53	4.83774e-50	110.515
RBMS3	-5.86711	5.24466	-17.3814	3.01229e-53	5.54377e-50	110.332
GYPC	-32.3466	34.2195	-17.3563	3.95403e-53	6.94615e-50	110.062
C1R	-163.944	156.567	-17.3311	5.19748e-53	8.73357e-50	109.791
MAN1C1	-8.40658	8.93561	-17.3192	5.91333e-53	9.52243e-50	109.664
CYBRD1	-93.6733	97.1198	-17.2367	1.44695e-52	2.23686e-49	108.777
NAP1L3	-5.42724	4.47629	-17.1682	3.03705e-52	4.51446e-49	108.042
TMEM204	-27.5468	36.5903	-17.1617	3.25967e-52	4.66591e-49	107.972
SYDE1	-17.9278	19.6285	-17.1272	4.73235e-52	6.53199e-49	107.602
PABPC5	-1.64137	1.4534	-17.1076	5.84921e-52	7.79518e-49	107.392
SEPTIN4	-3.63678	4.03323	-16.9972	1.92883e-51	2.48485e-48	106.21
TTC28	-6.04862	7.1457	-16.9635	2.77605e-51	3.46092e-48	105.849
MAPK10	-4.12592	3.76698	-16.9435	3.44555e-51	4.16136e-48	105.635
ADGRA2	-38.5108	40.2684	-16.9342	3.80666e-51	4.45817e-48	105.536
TEK	-10.7011	12.1814	-16.8539	9.05108e-51	1.02884e-47	104.678
S1PR1	-35.57	37.2903	-16.8412	1.0372e-50	1.1453e-47	104.543
TCF4	-7.4758	9.91483	-16.8034	1.55814e-50	1.67275e-47	104.14
MSC-AS1	-1.87295	2.08259	-16.7814	1.97516e-50	2.06313e-47	103.905
PLXDC2	-20.6363	20.4651	-16.7769	2.07315e-50	2.10851e-47	103.857
OLFML1	-12.6921	12.4972	-16.7665	2.31826e-50	2.29733e-47	103.746
MAP3K3	-14.2907	21.6105	-16.7181	3.90325e-50	3.77132e-47	103.23
ARHGAP31	-10.092	12.3626	-16.7078	4.36137e-50	4.11118e-47	103.12
HACD4	-4.37812	5.74949	-16.5758	1.79898e-49	1.63886e-46	101.715
NDN	-45.4555	43.9876	-16.5745	1.82341e-49	1.63886e-46	101.702
PHLDB1	-9.31898	11.162	-16.567	1.97676e-49	1.73631e-46	101.622
CLIC2	-13.1703	16.8503	-16.5187	3.3165e-49	2.84836e-46	101.109
GAS7	-18.2114	17.6913	-16.512	3.5622e-49	2.99287e-46	101.038
ZNF521	-6.73983	6.73417	-16.4782	5.11722e-49	4.14927e-46	100.679
CLEC14A	-30.1163	35.5647	-16.4775	5.1533e-49	4.14927e-46	100.672
PODN	-76.432	58.15	-16.4735	5.38256e-49	4.24541e-46	100.629
IFFO1	-8.23904	10.7986	-16.4677	5.72845e-49	4.42786e-46	100.568
MGP	-654.708	453.76	-16.452	6.77102e-49	5.1311e-46	100.402
TIMP2	-163.767	188.441	-16.4341	8.2031e-49	6.08598e-46	100.212
LHFPL6	-78.4625	69.2205	-16.4325	8.34602e-49	6.08598e-46	100.195
SYNPO	-42.5285	49.5801	-16.3986	1.199e-48	8.58132e-46	99.8357
MMRN2	-24.1262	25.5601	-16.3813	1.44275e-48	1.01381e-45	99.6523
HIC1	-14.5151	15.4035	-16.3409	2.22231e-48	1.53371e-45	99.2242
NR3C1	-12.66	19.4745	-16.3358	2.34644e-48	1.59097e-45	99.1704
PLSCR4	-22.9585	23.2435	-16.3016	3.37975e-48	2.25208e-45	98.8088
GLT8D2	-16.4565	16.1792	-16.264	5.04922e-48	3.29603e-45	98.411
EMCN	-11.1517	11.5686	-16.2627	5.117e-48	3.29603e-45	98.3978
NRIP2	-5.21948	7.69544	-16.2436	6.27303e-48	3.97442e-45	98.1959
GUCY1B1	-28.5541	28.4858	-16.2379	6.66828e-48	4.1567e-45	98.1354
CNTN4	-2.51563	2.69157	-16.2315	7.13996e-48	4.38008e-45	98.0677
CTSO	-29.0125	44.7633	-16.1822	1.20638e-47	7.28504e-45	97.5479
LRRC32	-43.3331	43.2771	-16.1679	1.40535e-47	8.356e-45	97.3966
IL6ST	-44.8129	64.1864	-16.0509	4.879e-47	2.85703e-44	96.1633
ZBTB47	-23.1199	25.6785	-16.0362	5.70226e-47	3.28927e-44	96.0088
RCBTB2	-8.28423	14.0384	-16.0267	6.30875e-47	3.5856e-44	95.9087
JAM3	-26.9035	25.612	-16.0138	7.232e-47	4.05076e-44	95.7733
GGT5	-25.6524	25.9407	-15.9997	8.39601e-47	4.63556e-44	95.6254
GUCY1A1	-37.9745	32.6927	-15.9881	9.50247e-47	5.17256e-44	95.5028
DNAJC18	-3.73402	4.66677	-15.9826	1.0071e-46	5.40588e-44	95.4452
TNS2	-29.089	32.3475	-15.9717	1.13068e-46	5.98609e-44	95.3305
JAZF1	-8.10509	11.8956	-15.9689	1.16453e-46	6.08197e-44	95.3013
GNG11	-33.053	36.5144	-15.9525	1.38645e-46	7.14448e-44	95.1284
EVC	-10.9801	11.2304	-15.9418	1.55285e-46	7.89666e-44	95.0161
NR2F1	-30.7065	30.3995	-15.931	1.7403e-46	8.73494e-44	94.9032
LAMA2	-15.5203	14.9795	-15.9154	2.05311e-46	1.01729e-43	94.7394
HEG1	-26.7965	31.7837	-15.9117	2.13585e-46	1.04489e-43	94.7003
ZCCHC24	-49.18	43.5551	-15.8783	3.04268e-46	1.46992e-43	94.3496
SHE	-4.45354	4.89393	-15.8695	3.3395e-46	1.59339e-43	94.2574
SETBP1-DT	-1.84255	1.9367	-15.8326	4.93157e-46	2.32433e-43	93.8711
DCN	-190.032	161.298	-15.8208	5.58651e-46	2.6013e-43	93.7476
BHLHE22	-3.5805	3.03133	-15.8027	6.76704e-46	3.11348e-43	93.5576
COL8A1	-35.1776	27.0817	-15.7887	7.84941e-46	3.56899e-43	93.4106
CD34	-22.7923	25.0166	-15.7832	8.31653e-46	3.73741e-43	93.3533
RAMP3	-33.6017	43.1875	-15.7471	1.21731e-45	5.40767e-43	92.9758
ELN	-89.7714	61.7892	-15.7448	1.24713e-45	5.47718e-43	92.9518
RFTN2	-2.23777	2.82971	-15.7367	1.35811e-45	5.89756e-43	92.8674
BICC1	-11.1824	10.1722	-15.7247	1.54156e-45	6.61979e-43	92.7418
PECAM1	-66.7303	85.796	-15.6831	2.39193e-45	1.01586e-42	92.3065
MAGEH1	-21.4025	33.4309	-15.6666	2.84642e-45	1.19574e-42	92.1342
ENTPD1	-8.1031	12.8434	-15.6372	3.88044e-45	1.61259e-42	91.8271
PTPRM	-12.2467	16.8534	-15.6261	4.36112e-45	1.79307e-42	91.7114
FKBP7	-9.15509	12.8473	-15.6198	4.66099e-45	1.89043e-42	91.6455
MYCT1	-9.8463	11.101	-15.6191	4.69575e-45	1.89043e-42	91.6382
GPR162	-3.291	3.9196	-15.6026	5.58363e-45	2.2247e-42	91.4666
JAM2	-14.0385	14.0393	-15.5959	5.99303e-45	2.36346e-42	91.3965
DIPK2B	-10.3275	10.6223	-15.583	6.86759e-45	2.681e-42	91.2615
EMILIN1	-174.202	172.261	-15.5757	7.4143e-45	2.86548e-42	91.1856
MPDZ	-10.157	9.23638	-15.5707	7.80913e-45	2.98819e-42	91.1342
LIX1L	-23.2705	28.6124	-15.5591	8.82751e-45	3.34476e-42	91.0128
PKD2	-25.9947	28.0045	-15.5564	9.08419e-45	3.4086e-42	90.9844
PREX2	-3.83289	4.31426	-15.5534	9.3702e-45	3.48211e-42	90.9537
PTGIR	-5.21684	6.05264	-15.5296	1.2032e-44	4.42869e-42	90.7059
GNB4	-14.5777	17.9696	-15.5268	1.23918e-44	4.5181e-42	90.6767
PMP22	-71.0787	89.0631	-15.4811	2.00334e-44	7.23597e-42	90.2008
LDLRAD4	-4.59161	5.76749	-15.4741	2.15493e-44	7.71146e-42	90.1285
BOC	-18.4883	13.739	-15.4702	2.24588e-44	7.96319e-42	90.0876
PDGFRB	-75.1805	80.1845	-15.4532	2.68424e-44	9.43097e-42	89.9109
RNF180	-2.75028	3.30067	-15.4288	3.46782e-44	1.20743e-41	89.6571
ECM2	-16.4972	13.8195	-15.4105	4.20114e-44	1.44969e-41	89.4671
INMT	-18.4603	14.2149	-15.4043	4.48461e-44	1.53382e-41	89.4024
LTBP1	-59.3666	60.0342	-15.3998	4.70124e-44	1.58717e-41	89.3556
AKT3	-13.7906	13.9749	-15.3993	4.72274e-44	1.58717e-41	89.3511
ABCA6	-3.11424	2.63613	-15.3966	4.85722e-44	1.61829e-41	89.3233
KIRREL1	-21.7497	24.0807	-15.3733	6.20121e-44	2.04841e-41	89.0813
SLIT2	-10.7829	8.40854	-15.3313	9.62568e-44	3.15266e-41	88.6457
GLI1	-5.94187	5.35614	-15.3155	1.1361e-43	3.68973e-41	88.4814
SCN4B	-6.43289	5.92827	-15.3136	1.15876e-43	3.73197e-41	88.4619
TNFSF12	-30.3011	38.4131	-15.3025	1.3005e-43	4.15385e-41	88.3475
TMEM47	-33.5489	36.4337	-15.2382	2.54802e-43	8.00616e-41	87.6812
RAI2	-22.9611	27.1959	-15.237	2.57837e-43	8.03618e-41	87.6695
FBN1	-51.7545	40.8022	-15.2077	3.50144e-43	1.08259e-40	87.3663
ITPR1	-8.85545	11.1641	-15.1929	4.08445e-43	1.24296e-40	87.2137
CDH11	-18.32	19.0332	-15.1921	4.11863e-43	1.24357e-40	87.2055
COL8A2	-15.1682	12.6587	-15.1869	4.35066e-43	1.30344e-40	87.1512
CSGALNACT2	-19.403	30.6729	-15.1854	4.41952e-43	1.31389e-40	87.1356
CCDC80	-94.9851	68.0115	-15.1845	4.46092e-43	1.31607e-40	87.1264
VEGFC	-9.64525	11.5823	-15.1809	4.62971e-43	1.35552e-40	87.0896
SELP	-13.3976	12.5417	-15.1742	4.96656e-43	1.44321e-40	87.02
SLC9A9	-6.84373	8.63681	-15.167	5.35441e-43	1.54431e-40	86.9455
HTR2A	-1.64953	1.28933	-15.1588	5.82887e-43	1.6687e-40	86.8614
TCF21	-5.62246	6.97581	-15.1533	6.1756e-43	1.75496e-40	86.8041
MAP3K12	-4.61776	5.75479	-15.1526	6.2218e-43	1.75518e-40	86.7967
GASK1B	-27.2337	32.894	-15.14	7.09028e-43	1.98569e-40	86.6673
MIR99AHG	-3.82207	2.89972	-15.1391	7.15596e-43	1.98967e-40	86.6582
PNMA8B	-1.38833	1.31524	-15.1025	1.04751e-42	2.89172e-40	86.2807
SERPING1	-222.938	247.124	-15.0909	1.18278e-42	3.24199e-40	86.1603
SETBP1	-6.44879	6.75453	-15.0868	1.23373e-42	3.35783e-40	86.1185
FIBIN	-24.7505	25.0224	-15.0451	1.90295e-42	5.14303e-40	85.6892
ADAMTSL3	-6.83502	5.8698	-15.0277	2.28181e-42	6.12412e-40	85.5094
MFAP4	-313.377	290.401	-15.025	2.34586e-42	6.25261e-40	85.4819
CPQ	-19.7749	34.6517	-14.9898	3.37909e-42	8.94486e-40	85.1204
NR2F1-AS1	-2.79944	2.8127	-14.9849	3.55794e-42	9.35423e-40	85.0693
RHOJ	-20.0787	20.9075	-14.9765	3.88264e-42	1.01389e-39	84.9828
HEYL	-31.2495	27.8185	-14.9701	4.14813e-42	1.07595e-39	84.9172
USHBP1	-1.75671	2.20247	-14.9657	4.33904e-42	1.11797e-39	84.8727
DCHS1	-14.3394	15.9037	-14.9639	4.42196e-42	1.13179e-39	84.8539
DLG4	-6.17315	7.91138	-14.9614	4.53777e-42	1.15379e-39	84.8283
ENG	-67.9619	97.6326	-14.9555	4.82554e-42	1.21894e-39	84.7674
LRRN4CL	-14.1701	12.2309	-14.9227	6.77794e-42	1.701e-39	84.4308
TXNDC15	-10.62	26.0145	-14.9117	7.59468e-42	1.89367e-39	84.3181
POU6F1	-4.05528	5.1003	-14.9035	8.27451e-42	2.04996e-39	84.2332
COL14A1	-76.2225	56.9736	-14.9019	8.41118e-42	2.07054e-39	84.217
COPZ2	-19.5319	19.9928	-14.8885	9.65685e-42	2.36214e-39	84.0801
NPR2	-7.54705	9.43172	-14.8761	1.09828e-41	2.66959e-39	83.9527
LAMA4	-35.9948	40.7743	-14.8547	1.36983e-41	3.30883e-39	83.7338
ARMCX2	-13.1827	16.6738	-14.8436	1.53781e-41	3.69151e-39	83.6192
HSPA12B	-13.8121	14.762	-14.8024	2.3524e-41	5.61208e-39	83.1981
C1QTNF2	-6.17951	5.64565	-14.775	3.12376e-41	7.40657e-39	82.9172
ARMH4	-1.5515	1.95871	-14.7678	3.36196e-41	7.92275e-39	82.8444
DOK6	-1.34688	1.24936	-14.7651	3.45666e-41	8.09654e-39	82.8169
GPC6	-11.5576	12.8392	-14.7536	3.89422e-41	9.06648e-39	82.6988
GASK1A	-6.02264	4.76123	-14.748	4.12696e-41	9.55081e-39	82.6413
LUM	-638.431	598.641	-14.7355	4.69404e-41	1.07985e-38	82.5138
PKNOX2	-1.58948	1.62877	-14.7239	5.28719e-41	1.20911e-38	82.3959
WBP1L	-23.5062	51.1467	-14.7202	5.49595e-41	1.24946e-38	82.3576
GIMAP8	-9.66944	12.8956	-14.7176	5.64614e-41	1.27609e-38	82.3308
RAMP2	-47.1149	61.8317	-14.7151	5.7911e-41	1.30125e-38	82.3057
BEND6	-1.4702	1.43244	-14.7022	6.61268e-41	1.47727e-38	82.1743
BNC2	-5.16245	4.48518	-14.6979	6.91218e-41	1.5353e-38	82.1304
PRICKLE1	-2.77465	2.93115	-14.6678	9.42983e-41	2.07393e-38	81.8228
ZNF135	-1.40858	1.47133	-14.6676	9.4445e-41	2.07393e-38	81.8212
FLRT2	-2.66184	2.07204	-14.6643	9.77517e-41	2.13441e-38	81.7871
LOXL1	-25.0315	32.0724	-14.6565	1.05877e-40	2.29884e-38	81.7081
MDFIC	-13.5031	19.8453	-14.6557	1.06742e-40	2.30468e-38	81.7
CYP1B1	-37.0003	28.1196	-14.6548	1.07786e-40	2.31428e-38	81.6904
PRKD1	-3.78585	4.18336	-14.6459	1.18118e-40	2.52211e-38	81.5997
TIE1	-13.8984	15.5575	-14.6171	1.58746e-40	3.371e-38	81.3069
SORCS2	-4.76332	3.96882	-14.6037	1.82224e-40	3.84841e-38	81.1702
RUNX1T1	-2.99467	2.67079	-14.5948	1.99702e-40	4.1946e-38	81.0795
KCNT2	-1.17736	1.25846	-14.5919	2.0582e-40	4.29975e-38	81.0496
DENND5A	-16.3391	21.0205	-14.5643	2.73152e-40	5.67569e-38	80.7693
MRAS	-11.8736	12.7736	-14.5531	3.06294e-40	6.33029e-38	80.6558
RGS7BP	-2.40203	2.2966	-14.5187	4.36069e-40	8.94903e-38	80.3059
EDNRA	-24.8714	23.0848	-14.5183	4.37634e-40	8.94903e-38	80.3024
KIAA1755	-4.57434	5.16118	-14.5152	4.51804e-40	9.19018e-38	80.2708
KCNE4	-12.9874	13.3244	-14.5132	4.61502e-40	9.33828e-38	80.2498
GIMAP6	-18.8496	25.7986	-14.5046	5.03907e-40	1.01383e-37	80.1627
ZFPM2	-3.41149	3.25303	-14.5041	5.06283e-40	1.01383e-37	80.1581
IL1R1	-47.1789	50.8454	-14.5021	5.16843e-40	1.02964e-37	80.1376
C8orf48	-1.08475	1.26285	-14.4795	6.51744e-40	1.29172e-37	79.9079
SYNE1	-5.58207	6.49883	-14.4617	7.81402e-40	1.5408e-37	79.7282
KANK3	-9.42649	10.8747	-14.4538	8.47183e-40	1.66203e-37	79.6481
SNX29	-4.41526	7.91431	-14.4515	8.68046e-40	1.69436e-37	79.624
CAVIN1	-286.342	282.831	-14.4479	9.00646e-40	1.74915e-37	79.5875
LRCH2	-3.23384	3.151	-14.4431	9.4564e-40	1.82735e-37	79.5392
RASL12	-17.5048	19.3954	-14.4292	1.09052e-39	2.09683e-37	79.398
PLCL1	-2.61668	3.38656	-14.4225	1.16749e-39	2.23373e-37	79.3305
MEOX2	-12.9843	9.23507	-14.4217	1.17721e-39	2.24123e-37	79.3223
ZNF423	-5.49093	4.83061	-14.4203	1.19344e-39	2.26097e-37	79.3087
CRTAP	-50.5848	83.3564	-14.4144	1.26867e-39	2.39179e-37	79.2482
PAPLN	-9.47057	10.5146	-14.4131	1.28488e-39	2.41058e-37	79.2356
DDR2	-31.8186	29.1803	-14.399	1.48471e-39	2.77204e-37	79.0924
OMD	-19.9034	13.6936	-14.3941	1.56125e-39	2.90092e-37	79.0426
PCDHGB7	-3.43126	3.63881	-14.3887	1.6494e-39	3.05005e-37	78.9882
ISLR	-114.097	105.602	-14.3826	1.75596e-39	3.23164e-37	78.9262
CD302	-6.50882	8.32443	-14.3669	2.06068e-39	3.77447e-37	78.7677
STARD8	-5.75733	7.40559	-14.3644	2.11321e-39	3.83433e-37	78.7428
DACT1	-14.5566	16.1348	-14.357	2.27867e-39	4.11524e-37	78.6681
TBXA2R	-3.34719	4.50384	-14.3411	2.68055e-39	4.8185e-37	78.5072
FAM124B	-2.30411	2.33502	-14.3205	3.30901e-39	5.92067e-37	78.2986
DLC1	-17.7351	18.2372	-14.3109	3.6472e-39	6.49572e-37	78.2023
SDC2	-35.1461	47.6482	-14.2953	4.2761e-39	7.58085e-37	78.0447
ZNF385D	-1.87441	1.65992	-14.2915	4.44428e-39	7.84304e-37	78.0065
FAM13C	-3.60433	3.44667	-14.2863	4.68562e-39	8.23135e-37	77.9541
LTBP2	-36.3479	37.3604	-14.2654	5.7993e-39	1.01417e-36	77.7429
RAB31	-48.47	58.2824	-14.2535	6.54327e-39	1.13912e-36	77.6234
SSPN	-12.1447	13.0776	-14.2497	6.80564e-39	1.17948e-36	77.5844
SPON1	-76.8573	69.6614	-14.2428	7.29376e-39	1.25843e-36	77.5158
MARVELD1	-45.0151	57.9275	-14.225	8.7454e-39	1.50219e-36	77.3361
CRISPLD2	-37.5976	39.0403	-14.1923	1.21944e-38	2.08536e-36	77.0068
CD200	-10.9283	12.913	-14.1901	1.24673e-38	2.12262e-36	76.9849
ARHGEF17	-19.5904	23.8176	-14.1788	1.39868e-38	2.37089e-36	76.871
CLEC1A	-2.61532	3.21629	-14.1771	1.42243e-38	2.40062e-36	76.8543
NLGN2	-14.8905	17.7432	-14.1621	1.65755e-38	2.78526e-36	76.7028
LRRC70	-1.11988	1.28824	-14.1598	1.69605e-38	2.83762e-36	76.6801
SYT11	-18.3064	19.946	-14.1568	1.74801e-38	2.91194e-36	76.6502
FOXN3	-13.0606	25.1052	-14.1522	1.83165e-38	3.03818e-36	76.6039
FBLN1	-184.322	154.111	-14.1371	2.13603e-38	3.52792e-36	76.4517
SERPINF1	-163.89	137.445	-14.1313	2.2633e-38	3.72221e-36	76.3943
PTGIS	-47.3026	33.6894	-14.126	2.38947e-38	3.91306e-36	76.3406
PCDH18	-11.2062	14.6696	-14.125	2.41287e-38	3.93471e-36	76.331
FZD4	-15.1325	17.4937	-14.1245	2.42515e-38	3.93811e-36	76.3259
LDB2	-8.57063	11.0499	-14.106	2.92713e-38	4.73337e-36	76.1396
ARSB	-5.7159	8.9402	-14.0899	3.44449e-38	5.54678e-36	75.9784
FAM43B	-1.63751	1.23503	-14.0858	3.59198e-38	5.76028e-36	75.9369
IGFBP5	-302.501	339.108	-14.0724	4.11117e-38	6.53863e-36	75.8032
KCNJ8	-15.6537	17.7427	-14.0576	4.77829e-38	7.5685e-36	75.6543
SH2D3C	-9.2771	13.4218	-14.0566	4.82712e-38	7.61464e-36	75.6442
KCTD12	-66.581	85.6247	-14.0353	5.98758e-38	9.40683e-36	75.4309
ARHGAP20	-2.35794	2.09468	-14.0342	6.05182e-38	9.46926e-36	75.4203
PLPP7	-4.66653	4.55057	-14.0249	6.64734e-38	1.03591e-35	75.3273
SCARF2	-22.8274	23.7852	-13.9925	9.22267e-38	1.43148e-35	75.0031
DAB2	-23.9974	30.5729	-13.9703	1.15349e-37	1.78321e-35	74.7815
HMCN1	-5.55073	4.52402	-13.969	1.16941e-37	1.80061e-35	74.768
ARMCX1	-15.9424	20.3661	-13.9644	1.22521e-37	1.87904e-35	74.7218
CYRIA	-6.32273	8.92423	-13.9636	1.23488e-37	1.88639e-35	74.714
REM1	-5.69747	5.94222	-13.9611	1.26666e-37	1.92732e-35	74.6888
TMEM273	-6.32719	9.19543	-13.9321	1.69567e-37	2.56997e-35	74.4
S1PR3	-15.1438	15.5993	-13.9138	2.03985e-37	3.07953e-35	74.217
LPAR1	-13.918	16.5745	-13.9085	2.15064e-37	3.23416e-35	74.1646
IL3RA	-13.3856	20.2253	-13.9081	2.16e-37	3.23565e-35	74.1603
KCTD10	-15.5624	23.847	-13.9006	2.33068e-37	3.47785e-35	74.085
COL6A2	-453.716	488.469	-13.8881	2.64144e-37	3.9264e-35	73.9611
GGTA1	-7.10979	7.98137	-13.8861	2.69459e-37	3.99007e-35	73.9413
TCEAL7	-11.3343	10.6825	-13.8788	2.90158e-37	4.28017e-35	73.868
ZBTB4	-33.5276	54.9685	-13.8739	3.04779e-37	4.46178e-35	73.8194
ZNF25	-7.67076	10.6476	-13.8702	3.16452e-37	4.61518e-35	73.7821
CYSLTR1	-2.74578	3.63761	-13.8631	3.39796e-37	4.937e-35	73.7117
PLEKHO2	-25.9526	38.72	-13.8621	3.4333e-37	4.96967e-35	73.7014
GALNT16	-3.24563	2.79392	-13.8613	3.45935e-37	4.98869e-35	73.6939
ANGPTL2	-81.9072	82.3657	-13.8469	4.00042e-37	5.74752e-35	73.55
APBB1	-12.9566	14.4587	-13.8378	4.38035e-37	6.27007e-35	73.4602
KCND1	-1.8554	2.28683	-13.8292	4.77865e-37	6.81495e-35	73.374
SLC24A3	-10.467	11.9605	-13.8243	5.01856e-37	7.13079e-35	73.3255
DHH	-2.82117	2.45516	-13.8188	5.30236e-37	7.50644e-35	73.271
GIMAP1	-5.01376	6.6686	-13.8162	5.44545e-37	7.68087e-35	73.2447
THBS3	-9.1996	14.0897	-13.7965	6.63094e-37	9.319e-35	73.0496
RASGRF2	-2.78522	3.79126	-13.7797	7.84798e-37	1.09894e-34	72.8828
TGFB3	-17.8127	17.1047	-13.7766	8.09782e-37	1.12984e-34	72.8517
ARHGEF15	-8.2115	9.00506	-13.7702	8.64044e-37	1.20121e-34	72.7875
ITGBL1	-12.1863	8.12697	-13.7594	9.62259e-37	1.33295e-34	72.6809
COLEC12	-13.4851	11.7326	-13.7571	9.84703e-37	1.35917e-34	72.6581
MAP1A	-12.2607	10.6505	-13.7536	1.02005e-36	1.40295e-34	72.6232
EHD2	-95.3798	113.628	-13.7468	1.09205e-36	1.49664e-34	72.5556
OLFML3	-61.8834	61.1114	-13.7366	1.20965e-36	1.65197e-34	72.4543
NXPE3	-4.12382	6.93284	-13.689	1.94826e-36	2.65128e-34	71.9824
SPART	-13.8634	18.6826	-13.6876	1.97585e-36	2.67938e-34	71.9685
LZTS1	-7.02141	7.37921	-13.6834	2.05924e-36	2.78271e-34	71.9276
CDH5	-23.507	29.7721	-13.6818	2.09288e-36	2.81832e-34	71.9115
DOK5	-3.72291	3.49513	-13.6769	2.19864e-36	2.95045e-34	71.8627
PLXDC1	-4.93396	7.45905	-13.6629	2.52794e-36	3.38061e-34	71.7245
BACE1	-8.08049	11.7893	-13.6616	2.56154e-36	3.41374e-34	71.7114
MIR100HG	-13.4339	11.6677	-13.6576	2.66605e-36	3.54081e-34	71.6718
ACKR1	-63.2085	50.5056	-13.651	2.84831e-36	3.76991e-34	71.6064
DNM3OS	-5.33088	5.2582	-13.638	3.24162e-36	4.27584e-34	71.4783
AEBP1	-172.519	183.191	-13.632	3.44271e-36	4.52564e-34	71.4187
FAM172A	-7.21461	14.073	-13.6271	3.61625e-36	4.73765e-34	71.37
NFATC4	-10.213	11.0219	-13.6261	3.65113e-36	4.76719e-34	71.3605
SSC5D	-17.4457	14.4227	-13.6148	4.08832e-36	5.32004e-34	71.2485
MAF	-15.7588	26.7141	-13.6142	4.11031e-36	5.33072e-34	71.2432
CYTH3	-14.9278	26.6213	-13.5842	5.54753e-36	7.12296e-34	70.9463
SH3BGRL	-130.128	188.178	-13.577	5.95613e-36	7.62227e-34	70.876
GREM1	-99.7703	81.6857	-13.5725	6.23285e-36	7.95007e-34	70.831
MARCHF2	-22.6385	41.8661	-13.5635	6.81532e-36	8.66442e-34	70.7425
PRELP	-60.2287	45.4192	-13.557	7.27292e-36	9.21586e-34	70.6782
CRISPLD1	-9.90986	8.28233	-13.5424	8.40754e-36	1.06188e-33	70.5347
EFEMP1	-126.981	90.6145	-13.5264	9.85872e-36	1.24111e-33	70.377
RHOQ	-19.5425	31.4938	-13.5203	1.04765e-35	1.3146e-33	70.3168
SOD3	-171.02	166.704	-13.5154	1.09941e-35	1.37508e-33	70.2691
BHMT2	-7.63431	6.68633	-13.5132	1.12391e-35	1.40119e-33	70.2473
SH3BP5	-6.69695	7.9867	-13.5009	1.27e-35	1.57317e-33	70.1263
GALNT17	-2.36706	2.5339	-13.4776	1.60079e-35	1.9703e-33	69.8971
RGL1	-14.5748	18.192	-13.4765	1.6195e-35	1.987e-33	69.8856
TRPC1	-5.09044	5.13727	-13.4714	1.70337e-35	2.08329e-33	69.8356
ZNF362	-13.4692	26.1221	-13.4558	1.98938e-35	2.42541e-33	69.6819
TMEM200B	-6.62709	7.64978	-13.4491	2.12576e-35	2.58354e-33	69.6163
CYGB	-23.3374	36.8539	-13.448	2.14805e-35	2.60244e-33	69.606
STAB1	-26.0174	32.9821	-13.4466	2.17747e-35	2.62984e-33	69.5925
ARHGEF6	-9.48992	15.5059	-13.4463	2.18579e-35	2.63166e-33	69.5887
TIMP3	-104.657	158.532	-13.4458	2.19659e-35	2.63645e-33	69.5838
MCC	-4.80952	6.58455	-13.4237	2.73496e-35	3.27247e-33	69.3668
MAP7D3	-5.00416	6.49464	-13.3896	3.83366e-35	4.55887e-33	69.0325
SVEP1	-14.8331	10.2524	-13.3861	3.96804e-35	4.7042e-33	68.9984
GPRASP2	-5.52391	6.64764	-13.3849	4.0139e-35	4.74401e-33	68.987
WHAMMP2	-1.15025	1.28058	-13.3815	4.15306e-35	4.89352e-33	68.9533
EID1	-106.492	176.696	-13.3711	4.6035e-35	5.40779e-33	68.8513
EBF3	-4.45996	3.60219	-13.3665	4.81567e-35	5.63988e-33	68.8067
ZNF333	-1.72101	3.13668	-13.3615	5.0641e-35	5.91291e-33	68.7569
MEOX1	-9.57149	9.20147	-13.3607	5.10353e-35	5.941e-33	68.7492
PCDHB4	-2.65379	3.08632	-13.3456	5.92547e-35	6.8771e-33	68.6014
AR	-1.79003	1.5366	-13.3412	6.18774e-35	7.16e-33	68.5585
ABCC9	-12.886	10.1836	-13.3399	6.26408e-35	7.22669e-33	68.5464
GLIS2	-14.1327	18.5384	-13.3391	6.3181e-35	7.26731e-33	68.5379
ITIH5	-13.5703	13.7049	-13.3296	6.93815e-35	7.95684e-33	68.4452
FAM162B	-5.08303	6.35717	-13.3167	7.88182e-35	9.01232e-33	68.319
ECSCR	-5.20204	6.83565	-13.3161	7.93017e-35	9.04086e-33	68.3129
ADGRD1	-3.60532	3.64735	-13.2946	9.80093e-35	1.11081e-32	68.1032
SLIT3	-21.1257	14.9367	-13.2794	1.13844e-34	1.2865e-32	67.955
HGF	-4.34456	4.72996	-13.2779	1.15538e-34	1.30184e-32	67.9403
MEF2C	-8.44541	11.3758	-13.2754	1.18473e-34	1.33103e-32	67.9155
TM6SF1	-2.20542	2.96772	-13.275	1.18967e-34	1.33271e-32	67.9114
GLI3	-5.50859	5.22975	-13.2629	1.33992e-34	1.49668e-32	67.7937
RTL5	-5.02145	5.39496	-13.245	1.59926e-34	1.78122e-32	67.6185
THSD1	-3.8375	5.03655	-13.2442	1.61105e-34	1.78919e-32	67.6112
FRY	-3.00968	5.32409	-13.2387	1.70191e-34	1.8793e-32	67.5569
SENCR	-1.57707	1.8963	-13.2363	1.74193e-34	1.91801e-32	67.5339
ZEB1	-29.5098	28.7683	-13.2302	1.84965e-34	2.03083e-32	67.4745
IGFBP4	-1026.71	989.726	-13.2214	2.01801e-34	2.2094e-32	67.3883
PRRX1	-14.6165	14.5289	-13.2077	2.30871e-34	2.52054e-32	67.2551
ZNF582	-1.3663	1.78255	-13.205	2.36976e-34	2.5799e-32	67.2292
STOM	-134.308	190.651	-13.1969	2.56684e-34	2.7866e-32	67.1501
WWTR1	-31.8736	38.7384	-13.1899	2.74944e-34	2.97648e-32	67.0821
TSPAN4	-12.9467	17.4563	-13.188	2.80141e-34	3.02427e-32	67.0636
EVC2	-2.12504	2.61864	-13.1761	3.14882e-34	3.38985e-32	66.9479
GSTM5	-3.28335	3.11792	-13.1627	3.59148e-34	3.85566e-32	66.8177
RBMS1	-10.7227	17.5691	-13.1211	5.40343e-34	5.76883e-32	66.4133
ISLR2	-1.95449	1.89101	-13.1178	5.58436e-34	5.94558e-32	66.3807
GLP2R	-4.377	3.38966	-13.1172	5.61543e-34	5.96223e-32	66.3752
FAT4	-5.46416	6.02387	-13.1135	5.81987e-34	6.16236e-32	66.3398
CCDC102A	-9.89447	15.201	-13.1002	6.63211e-34	7.00322e-32	66.2105
GLI2	-4.91963	5.47316	-13.0896	7.36201e-34	7.73171e-32	66.1072
LURAP1	-1.38983	1.84229	-13.0851	7.69001e-34	8.05429e-32	66.064
FXYD6	-12.8014	11.8042	-13.0769	8.33387e-34	8.65826e-32	65.9844
PALM	-20.1234	18.6163	-13.0756	8.44142e-34	8.74649e-32	65.9717
SH3RF3	-7.25304	9.18577	-13.0674	9.15112e-34	9.45649e-32	65.8918
NRXN2	-3.61414	2.8026	-13.0646	9.40359e-34	9.69147e-32	65.8649
PTGFR	-5.05385	4.49688	-13.0551	1.03196e-33	1.05791e-31	65.7729
C16orf86	-2.36828	3.56606	-13.0543	1.04012e-33	1.06346e-31	65.7651
NID1	-62.7203	91.6543	-13.0452	1.13609e-33	1.15851e-31	65.6777
ABI3BP	-23.531	20.8035	-13.0231	1.41105e-33	1.43512e-31	65.4632
CREBL2	-15.3837	44.6001	-13.0225	1.41841e-33	1.43882e-31	65.4581
ANXA6	-64.644	88.3316	-13.0221	1.42466e-33	1.44137e-31	65.4537
AOC3	-88.4751	74.1345	-13.0214	1.43408e-33	1.44711e-31	65.4472
PLPP3	-25.7596	42.7419	-13.0184	1.47746e-33	1.487e-31	65.4177
CAMK1D	-6.19695	8.91491	-13.0121	1.57081e-33	1.57466e-31	65.357
PRKG1	-8.46696	8.96096	-13.0061	1.66573e-33	1.66349e-31	65.299
FLI1	-6.68633	10.0464	-12.994	1.87539e-33	1.86804e-31	65.1816
PEA15	-111.368	194.098	-12.991	1.93084e-33	1.91833e-31	65.1528
COL15A1	-72.6039	89.9674	-12.9884	1.97982e-33	1.96195e-31	65.128
ADAM33	-22.2407	19.2435	-12.9871	2.00572e-33	1.98253e-31	65.1151
FAM20C	-30.3332	44.3204	-12.9847	2.05289e-33	2.02398e-31	65.0921
C1RL	-13.0447	27.0276	-12.9788	2.17434e-33	2.13827e-31	65.0352
NOVA2	-1.47362	2.02896	-12.9737	2.28492e-33	2.24131e-31	64.9861
ANTXR1	-51.1652	57.7104	-12.9729	2.30238e-33	2.25272e-31	64.9786
FGF7	-24.028	19.6696	-12.9614	2.57726e-33	2.5153e-31	64.867
ZNF366	-2.02483	2.72234	-12.9591	2.6341e-33	2.5594e-31	64.8454
MRC2	-46.1589	50.8591	-12.9591	2.63569e-33	2.5594e-31	64.8448
CELF2	-13.3245	17.0125	-12.955	2.74257e-33	2.65651e-31	64.8054
HIGD1B	-3.96119	5.30211	-12.9509	2.85459e-33	2.75811e-31	64.7658
MS4A4E	-2.1256	2.31932	-12.9495	2.89481e-33	2.78999e-31	64.752
SSBP2	-4.85993	5.73561	-12.9479	2.93781e-33	2.82439e-31	64.7374
LRRC8C	-3.39775	5.84138	-12.927	3.60285e-33	3.45516e-31	64.5354
WHAMMP3	-1.13616	1.35035	-12.9132	4.12026e-33	3.94158e-31	64.4026
STAT5B	-21.6348	41.2477	-12.9072	4.36775e-33	4.16802e-31	64.3449
RSPO3	-21.4375	19.0435	-12.8886	5.23458e-33	4.98291e-31	64.1657
MN1	-12.2483	10.6742	-12.886	5.37132e-33	5.10051e-31	64.1402
ABCA9	-4.75264	3.51287	-12.8787	5.7616e-33	5.4577e-31	64.0707
CLIC4	-140.635	171.506	-12.8745	6.0055e-33	5.67483e-31	64.0297
ARL10	-2.11799	2.92218	-12.8601	6.90843e-33	6.51212e-31	63.8911
FEZ1	-6.19417	7.054	-12.8531	7.38896e-33	6.94814e-31	63.8245
GPRASP1	-9.28604	8.5189	-12.8509	7.54892e-33	7.08132e-31	63.8033
GJA4	-21.5464	26.2853	-12.8505	7.57916e-33	7.09247e-31	63.7994
DAAM2	-17.2036	18.0114	-12.847	7.84155e-33	7.3203e-31	63.7657
SGCD	-9.79677	8.84316	-12.8458	7.93319e-33	7.388e-31	63.7542
RORA	-2.34518	4.20408	-12.8437	8.09679e-33	7.52223e-31	63.734
ABCA8	-12.8573	12.0924	-12.8431	8.14375e-33	7.54512e-31	63.7283
OGN	-95.9614	68.7943	-12.8429	8.16048e-33	7.54512e-31	63.7262
ACVRL1	-14.1415	23.7421	-12.84	8.39271e-33	7.74132e-31	63.6985
LHX6	-3.14783	3.5827	-12.8178	1.04162e-32	9.58487e-31	63.4847
FBLN2	-88.3315	68.7937	-12.8129	1.09142e-32	1.00193e-30	63.4385
RTL8B	-11.6626	15.9628	-12.7995	1.24331e-32	1.13866e-30	63.3095
TBC1D2B	-10.955	21.7194	-12.7945	1.30541e-32	1.19271e-30	63.2613
FMNL3	-7.37764	11.602	-12.7941	1.30963e-32	1.19374e-30	63.2581
CD93	-42.4293	53.0524	-12.7867	1.40682e-32	1.27932e-30	63.1873
THY1	-63.2811	68.3561	-12.7862	1.41424e-32	1.28304e-30	63.1821
COX7A1	-30.2705	33.0126	-12.7804	1.49589e-32	1.35393e-30	63.1265
LEPR	-6.1476	7.27003	-12.7712	1.63613e-32	1.47741e-30	63.0378
CLIP3	-26.896	24.4175	-12.7489	2.03003e-32	1.82457e-30	62.8243
FRZB	-54.1831	46.2068	-12.7443	2.12098e-32	1.90189e-30	62.781
C4A	-10.8952	11.468	-12.7434	2.14065e-32	1.91509e-30	62.7718
PARVA	-46.7996	55.795	-12.7409	2.19302e-32	1.95741e-30	62.7479
NHSL2	-13.5832	13.4813	-12.7371	2.27421e-32	2.0252e-30	62.7119
PCDHGA12	-2.4125	2.35356	-12.7162	2.78387e-32	2.47274e-30	62.5118
COL6A3	-123.804	130.103	-12.716	2.78958e-32	2.47274e-30	62.5098
CHROMR	-3.04745	5.67658	-12.7145	2.82944e-32	2.50234e-30	62.4958
IRAG1	-39.0627	36.2178	-12.7089	2.98684e-32	2.63551e-30	62.4422
ZNF354C	-2.13327	2.88729	-12.7033	3.15295e-32	2.77575e-30	62.3886
RPS6KA2	-9.11899	19.2169	-12.6995	3.26925e-32	2.87159e-30	62.3528
RBFOX2	-18.1138	30.111	-12.6983	3.3093e-32	2.90017e-30	62.3407
SAMD11	-8.40446	9.72596	-12.6972	3.34313e-32	2.9232e-30	62.3307
PCAT19	-2.85836	3.90203	-12.6922	3.50962e-32	3.06185e-30	62.2826
RNF217	-2.6236	3.68928	-12.6785	4.00415e-32	3.48541e-30	62.1521
NRP1	-16.7676	24.8954	-12.674	4.18221e-32	3.62408e-30	62.1091
SPARCL1	-594.065	540.803	-12.6716	4.28099e-32	3.70138e-30	62.086
WWC3	-12.8995	21.8485	-12.6702	4.33763e-32	3.74198e-30	62.073
SPSB1	-23.7198	37.1775	-12.6501	5.26839e-32	4.53481e-30	61.8806
CYP7B1	-5.54613	6.14389	-12.6496	5.29344e-32	4.54624e-30	61.8759
PCDHGC3	-9.78086	12.0128	-12.6464	5.45695e-32	4.67628e-30	61.8458
DKK3	-50.4625	65.67	-12.644	5.58415e-32	4.76416e-30	61.823
EML1	-15.7251	14.9114	-12.6413	5.7341e-32	4.88131e-30	61.7968
MFAP5	-38.0546	27.7776	-12.6387	5.87983e-32	4.99437e-30	61.7719
TENM4	-1.66826	1.75959	-12.6305	6.36085e-32	5.3911e-30	61.6941
NFIA	-12.6115	17.9913	-12.6266	6.60725e-32	5.58768e-30	61.6565
SYNDIG1	-4.71773	5.06916	-12.6197	7.05979e-32	5.95735e-30	61.591
DPYSL3	-138.025	117.239	-12.6172	7.2267e-32	6.08491e-30	61.5679
TMEM119	-33.8668	31.4503	-12.615	7.38596e-32	6.20549e-30	61.5463
CALHM2	-13.8363	19.3233	-12.6104	7.71709e-32	6.46963e-30	61.5029
ZNF781	-1.19642	1.29959	-12.5998	8.5477e-32	7.15047e-30	61.4017
PEAR1	-6.60178	8.65335	-12.5934	9.0931e-32	7.59028e-30	61.3405
SLC45A1	-2.32996	2.85841	-12.5859	9.77077e-32	8.13838e-30	61.2694
CEP68	-5.88482	11.2909	-12.5822	1.01271e-31	8.41707e-30	61.234
RERG	-20.9184	18.0946	-12.5717	1.11961e-31	9.28553e-30	61.1347
PCOLCE	-46.9388	50.3515	-12.5639	1.20649e-31	9.98464e-30	61.0607
MICU3	-2.43593	3.10815	-12.5567	1.29284e-31	1.06765e-29	60.9923
SMIM10	-10.1814	12.1608	-12.5558	1.30418e-31	1.07471e-29	60.9837
CHST7	-6.07312	9.13789	-12.5498	1.38205e-31	1.13645e-29	60.9263
TLL1	-1.97269	1.80374	-12.5436	1.4667e-31	1.2035e-29	60.8675
F8	-4.27488	4.17323	-12.5302	1.66689e-31	1.36487e-29	60.7409
MCAM	-76.1326	86.6858	-12.5261	1.73453e-31	1.41726e-29	60.7015
ELK3	-23.8572	43.5523	-12.5235	1.77887e-31	1.45013e-29	60.6765
PDE2A	-8.28496	7.82755	-12.5233	1.78226e-31	1.45013e-29	60.6746
NAV3	-1.69664	1.3746	-12.5205	1.82955e-31	1.48547e-29	60.6487
ZNF835	-1.34644	1.31712	-12.5178	1.87767e-31	1.52135e-29	60.623
C1orf54	-11.9416	19.4063	-12.5152	1.92543e-31	1.55678e-29	60.5982
MXRA8	-93.431	101.352	-12.5096	2.03225e-31	1.63972e-29	60.5448
GAB3	-2.46855	4.31491	-12.5086	2.05135e-31	1.65167e-29	60.5355
LINC00924	-1.98697	1.53467	-12.5038	2.14738e-31	1.72541e-29	60.4902
LEPROT	-19.4349	55.3737	-12.4933	2.37486e-31	1.90423e-29	60.3906
ADARB1	-8.5098	10.417	-12.4911	2.42533e-31	1.94067e-29	60.3698
CLEC11A	-35.5556	40.072	-12.4879	2.50126e-31	1.99729e-29	60.3393
ZSCAN18	-5.10825	6.44537	-12.4834	2.6112e-31	2.08078e-29	60.2968
MAFB	-31.0092	43.9351	-12.4823	2.63855e-31	2.09824e-29	60.2864
PRPH2	-1.36765	1.89079	-12.4785	2.73514e-31	2.17059e-29	60.2509
LINC01638	-1.50257	1.2961	-12.4773	2.76749e-31	2.19176e-29	60.2392
LINC02773	-1.09244	1.16421	-12.4723	2.90246e-31	2.29396e-29	60.1921
KANK2	-79.2934	78.6641	-12.4687	3.00363e-31	2.36907e-29	60.1582
FAM180A	-4.35006	3.15925	-12.4667	3.06219e-31	2.41034e-29	60.1391
ADGRL4	-18.1621	24.5469	-12.4641	3.13987e-31	2.46646e-29	60.1143
ATP1B2	-4.79514	4.53544	-12.4611	3.23291e-31	2.53439e-29	60.0854
HECTD2	-2.53844	3.85119	-12.4535	3.47384e-31	2.71775e-29	60.0143
CREBRF	-4.27552	9.11414	-12.4525	3.508e-31	2.73893e-29	60.0046
THBS4-AS1	-1.96637	1.46375	-12.4416	3.89268e-31	3.03315e-29	59.9017
SCARA3	-24.6531	26.42	-12.4358	4.11648e-31	3.19465e-29	59.8464
KLF7	-6.56229	11.6443	-12.4326	4.24432e-31	3.28727e-29	59.8161
RPH3AL-AS1	-1.07996	1.2724	-12.4302	4.34309e-31	3.35704e-29	59.7934
RNF130	-6.68623	16.1425	-12.428	4.433e-31	3.41969e-29	59.7731
ASPN	-138.737	120.508	-12.4276	4.45248e-31	3.42788e-29	59.7688
GEM	-85.9706	83.5649	-12.4236	4.62193e-31	3.55126e-29	59.7318
TUB	-4.28717	4.20854	-12.4232	4.64305e-31	3.56041e-29	59.7273
RASIP1	-11.7219	14.8723	-12.4152	5.01154e-31	3.83537e-29	59.6517
NATD1	-5.51149	10.6178	-12.4142	5.05969e-31	3.86456e-29	59.6423
MAGEE1	-1.97038	2.633	-12.4083	5.35286e-31	4.07239e-29	59.5865
MFGE8	-31.9076	50.5904	-12.3906	6.33609e-31	4.81095e-29	59.4197
ISM1	-13.215	10.3957	-12.3877	6.51264e-31	4.93531e-29	59.3925
ANGPT1	-5.19896	5.39208	-12.3811	6.93605e-31	5.24588e-29	59.3302
DZIP1	-5.57011	6.35944	-12.3804	6.97957e-31	5.26848e-29	59.324
CNTNAP1	-12.2812	12.0879	-12.3728	7.50612e-31	5.6549e-29	59.2521
GLIPR2	-28.2398	38.4861	-12.368	7.85557e-31	5.90666e-29	59.207
PDE5A	-14.6858	18.7199	-12.3659	8.01518e-31	6.01497e-29	59.1871
SLC12A4	-10.8282	18.6307	-12.3657	8.03107e-31	6.01521e-29	59.1852
AFAP1	-12.3441	20.7835	-12.3622	8.29951e-31	6.20425e-29	59.1526
VIM	-198.708	279.873	-12.36	8.47621e-31	6.31851e-29	59.1318
DYNC2H1	-1.70504	2.54349	-12.3599	8.48506e-31	6.31851e-29	59.1308
CMYA5	-1.53454	1.34346	-12.3567	8.74605e-31	6.50033e-29	59.1008
CC2D2A	-5.16565	6.6406	-12.3482	9.48521e-31	7.03617e-29	59.0205
TBCEL	-3.44228	6.71425	-12.3474	9.55657e-31	7.07552e-29	59.0131
HHIP-AS1	-2.58675	2.7062	-12.3462	9.66955e-31	7.13577e-29	59.0015
ADAP2	-6.66273	11.4546	-12.3461	9.67487e-31	7.13577e-29	59.0009
COL4A2	-167.845	224.028	-12.3435	9.91994e-31	7.30259e-29	58.9762
MSN	-94.1228	164.739	-12.3426	1.00017e-30	7.34874e-29	58.9681
PLAC9	-29.5962	28.3523	-12.3379	1.04589e-30	7.67013e-29	58.9239
PPM1F	-7.11995	12.8579	-12.3339	1.0865e-30	7.95288e-29	58.8862
LINC02884	-1.84123	1.45394	-12.3315	1.11165e-30	8.12158e-29	58.8635
RAB3IL1	-11.0048	15.0149	-12.3304	1.12416e-30	8.19745e-29	58.8525
ROR2	-13.7368	13.8871	-12.328	1.14929e-30	8.36491e-29	58.8306
SRPX	-48.2233	35.2614	-12.3276	1.15399e-30	8.38336e-29	58.8265
CTSK	-152.217	161.791	-12.3264	1.16737e-30	8.46467e-29	58.8151
ANK2	-7.80158	6.59557	-12.3243	1.19031e-30	8.6148e-29	58.7959
RILPL1	-3.35043	5.28297	-12.3183	1.26043e-30	9.10529e-29	58.7393
CADM3-AS1	-1.11365	1.02328	-12.3106	1.35628e-30	9.77938e-29	58.6668
BNC2-AS1	-2.70902	2.60269	-12.3033	1.45433e-30	1.04669e-28	58.5977
RBM43	-4.08515	7.76212	-12.3026	1.46388e-30	1.0516e-28	58.5912
SLCO2A1	-22.0017	34.3321	-12.3005	1.49269e-30	1.0703e-28	58.572
CBX7	-15.4479	21.2144	-12.2989	1.51576e-30	1.08484e-28	58.5568
CH25H	-9.07049	9.02215	-12.2944	1.58154e-30	1.12982e-28	58.5148
SH3RF3-AS1	-3.308	3.9315	-12.2779	1.85024e-30	1.31691e-28	58.3595
C20orf194	-8.26389	11.9239	-12.2776	1.85556e-30	1.31826e-28	58.3567
FZD1	-12.0791	18.7193	-12.2629	2.13401e-30	1.51331e-28	58.2184
P3H3	-10.7638	16.1501	-12.2609	2.17376e-30	1.53867e-28	58.2001
NOTCH2	-12.5111	22.0615	-12.2601	2.19043e-30	1.54763e-28	58.1925
ENOX1	-4.04487	4.56224	-12.258	2.23452e-30	1.5759e-28	58.1728
CALCOCO1	-15.2676	28.6257	-12.2575	2.24463e-30	1.58015e-28	58.1684
ANKRD6	-1.65811	2.59002	-12.2478	2.46134e-30	1.72956e-28	58.0772
ADCY4	-5.0692	6.35925	-12.2446	2.53666e-30	1.77926e-28	58.0474
CNN3	-89.8345	141.782	-12.2383	2.69364e-30	1.88593e-28	57.988
RGS5	-109.86	162.568	-12.2369	2.72855e-30	1.90693e-28	57.9752
PKIG	-53.7508	69.1534	-12.2325	2.84536e-30	1.98497e-28	57.9338
KLF9	-40.2203	52.5524	-12.2315	2.87344e-30	2.00095e-28	57.9241
BGN	-444.425	480.152	-12.2213	3.16478e-30	2.19986e-28	57.8285
MSC	-13.4184	17.4431	-12.2128	3.43006e-30	2.37571e-28	57.7489
GARRE1	-8.52233	16.7904	-12.2124	3.44155e-30	2.37941e-28	57.7456
AFAP1L1	-5.95855	8.57045	-12.1975	3.96412e-30	2.73093e-28	57.6057
CMTM3	-20.7491	32.4327	-12.1917	4.18709e-30	2.8794e-28	57.5516
ST6GALNAC5	-6.71721	6.30306	-12.1897	4.26462e-30	2.9272e-28	57.5335
FAM13B	-9.35872	15.6556	-12.1841	4.49644e-30	3.07573e-28	57.4811
TTC7B	-1.65642	2.64142	-12.1644	5.41778e-30	3.69941e-28	57.2967
SESN3	-11.4061	15.0748	-12.1593	5.68368e-30	3.87412e-28	57.2493
BCL6B	-8.92858	11.996	-12.1574	5.79017e-30	3.93976e-28	57.231
PBXIP1	-57.4812	118.66	-12.1455	6.47577e-30	4.39852e-28	57.1203
PDE7B	-4.96638	5.03253	-12.1308	7.43617e-30	5.04199e-28	56.9835
EPHA3	-13.019	11.1708	-12.1243	7.90689e-30	5.35176e-28	56.9228
FOXF1	-42.2649	45.8264	-12.1229	8.01737e-30	5.41705e-28	56.909
SERINC1	-76.1904	187.395	-12.1225	8.04276e-30	5.42472e-28	56.9059
LTBP3	-32.0325	45.6281	-12.1213	8.13615e-30	5.47816e-28	56.8945
CYB5R3	-48.0573	111.428	-12.1205	8.19651e-30	5.5092e-28	56.8872
BCL2	-5.81002	8.83168	-12.1145	8.67307e-30	5.8093e-28	56.8313
MAGI2	-1.75083	2.13517	-12.1113	8.94262e-30	5.97284e-28	56.801
IL34	-7.83038	10.3298	-12.1112	8.94814e-30	5.97284e-28	56.8004
TTBK2	-2.26312	3.96411	-12.1065	9.34993e-30	6.23028e-28	56.757
RHOQP2	-1.22369	1.62127	-12.1032	9.65219e-30	6.40959e-28	56.7255
HDGFL3	-4.64958	5.90787	-12.101	9.84767e-30	6.52818e-28	56.7057
PTGER3	-6.66531	7.24678	-12.1007	9.87935e-30	6.53796e-28	56.7025
VASH1	-8.10921	12.6004	-12.09	1.09246e-29	7.21731e-28	56.603
C7	-210.549	153.833	-12.0892	1.10061e-29	7.25876e-28	56.5957
LINC02593	-2.15335	2.59411	-12.0882	1.11136e-29	7.31715e-28	56.586
TCEAL3	-15.4573	24.5929	-12.0874	1.11907e-29	7.35541e-28	56.5792
THSD7A	-2.03759	2.34557	-12.0871	1.12277e-29	7.3672e-28	56.5759
TRO	-2.77006	3.22861	-12.0739	1.27159e-29	8.32959e-28	56.4528
CPXM2	-51.7975	41.2125	-12.0691	1.32986e-29	8.6965e-28	56.4085
SNRK	-8.4137	20.2078	-12.0608	1.43779e-29	9.38646e-28	56.3313
FOXS1	-12.9852	12.4929	-12.0502	1.58768e-29	1.03475e-27	56.2332
VWF	-44.4462	55.7787	-12.0493	1.60174e-29	1.04215e-27	56.2245
PBX1	-9.18466	12.2159	-12.0455	1.6608e-29	1.07877e-27	56.1887
NCKAP5L	-5.04335	9.39326	-12.0444	1.67737e-29	1.0877e-27	56.1789
STING1	-19.01	33.9491	-12.0415	1.72399e-29	1.11606e-27	56.1518
ADGRL2	-11.4578	18.9062	-12.0218	2.07279e-29	1.33962e-27	55.9695
LAYN	-17.1955	15.5213	-12.0197	2.11501e-29	1.36462e-27	55.9496
CSDC2	-4.5849	4.2242	-12.0121	2.27198e-29	1.46102e-27	55.8788
ARHGEF25	-21.1324	20.5122	-12.0066	2.39143e-29	1.53528e-27	55.8281
NLGN3	-2.3405	2.59297	-11.99	2.79288e-29	1.79004e-27	55.6746
RUSC2	-13.4821	20.9555	-11.988	2.84661e-29	1.82146e-27	55.6558
ROBO1	-8.33471	11.7805	-11.981	3.03953e-29	1.94168e-27	55.5909
THBS4	-118.817	74.6226	-11.9772	3.14908e-29	2.00834e-27	55.5559
CHSY3	-2.88823	3.68193	-11.9712	3.3308e-29	2.12073e-27	55.5004
STON1	-11.0449	10.0766	-11.971	3.33908e-29	2.12251e-27	55.498
ATXN1	-4.29935	9.17954	-11.9705	3.35369e-29	2.1283e-27	55.4936
HSPG2	-87.9625	115.387	-11.9703	3.36127e-29	2.12961e-27	55.4914
SKI	-29.1269	58.927	-11.9664	3.48368e-29	2.20355e-27	55.456
IGIP	-4.97888	10.214	-11.9638	3.56953e-29	2.25049e-27	55.432
FERMT2	-37.8852	36.3754	-11.9477	4.15264e-29	2.61386e-27	55.2823
MXRA7	-39.1841	43.7494	-11.9462	4.21139e-29	2.64653e-27	55.2684
ZNF853	-9.69099	10.3101	-11.9408	4.42732e-29	2.77321e-27	55.219
LSAMP	-6.58245	7.21561	-11.9402	4.45446e-29	2.78569e-27	55.2129
RAP2C-AS1	-1.14408	1.69758	-11.9276	5.00938e-29	3.12766e-27	55.0968
MAP1B	-22.283	19.6497	-11.9257	5.09898e-29	3.17847e-27	55.0793
C14orf132	-14.2405	12.3205	-11.9241	5.17459e-29	3.22041e-27	55.0647
TUBA1A	-154.722	159.484	-11.9229	5.23616e-29	3.25349e-27	55.053
CSF1R	-30.908	44.8435	-11.9177	5.49555e-29	3.40918e-27	55.0052
SOX17	-12.7747	11.395	-11.9151	5.62959e-29	3.48674e-27	54.9814
TBC1D19	-2.45599	4.55702	-11.913	5.7409e-29	3.54999e-27	54.962
PPM1M	-7.94243	16.4882	-11.9086	5.98315e-29	3.69388e-27	54.9211
ATP8B4	-1.37424	1.85009	-11.9063	6.11442e-29	3.7689e-27	54.8997
GXYLT2	-8.46402	7.43905	-11.9035	6.27478e-29	3.86159e-27	54.8741
MYH10	-18.3334	21.6274	-11.9029	6.30999e-29	3.87708e-27	54.8685
APLNR	-31.7102	38.0379	-11.8976	6.62624e-29	4.05849e-27	54.8202
CXCL12	-68.2315	52.6387	-11.8956	6.75518e-29	4.1244e-27	54.8011
ARHGAP22	-1.50226	2.18784	-11.8859	7.39146e-29	4.50576e-27	54.7121
SHANK3	-18.1822	23.9246	-11.885	7.45454e-29	4.53706e-27	54.7037
TWIST2	-12.9701	11.4499	-11.8845	7.49135e-29	4.55229e-27	54.6988
KIAA1614	-1.59115	1.86997	-11.8822	7.65423e-29	4.64397e-27	54.6775
TNS1	-122.064	103.688	-11.88	7.8114e-29	4.73189e-27	54.6574
VCAN	-33.532	39.4272	-11.8769	8.03889e-29	4.86208e-27	54.629
TRABD2B	-3.06745	3.06146	-11.8768	8.05204e-29	4.86242e-27	54.6274
RNF144A	-7.72798	10.5098	-11.8738	8.27927e-29	4.99184e-27	54.5999
PDZRN3	-24.7235	24.3793	-11.8714	8.4636e-29	5.09503e-27	54.5781
BMPR2	-12.7451	28.4095	-11.8708	8.51135e-29	5.11581e-27	54.5726
PHF21A	-4.31952	9.81604	-11.8652	8.96557e-29	5.38046e-27	54.5212
NCALD	-6.24798	7.53205	-11.8414	1.11969e-28	6.7091e-27	54.3014
PIP4K2A	-11.6181	26.0322	-11.8411	1.122e-28	6.71257e-27	54.2993
FAM229B	-6.06677	8.06769	-11.8276	1.273e-28	7.60418e-27	54.1745
TSPAN11	-7.9542	8.53272	-11.8259	1.29327e-28	7.7133e-27	54.1589
SPARC	-653.116	722.344	-11.8153	1.42613e-28	8.49264e-27	54.0622
BEND5	-4.30755	4.63678	-11.8147	1.43516e-28	8.532e-27	54.0559
TRIL	-5.49352	7.67276	-11.8145	1.43716e-28	8.532e-27	54.0545
MYADM	-118.366	170.818	-11.8068	1.54435e-28	9.1543e-27	53.9834
CDO1	-9.11769	6.16089	-11.8027	1.60384e-28	9.49237e-27	53.946
NEGR1	-6.80697	6.66598	-11.8002	1.6423e-28	9.70515e-27	53.9226
NRK	-3.45874	2.46387	-11.7978	1.67933e-28	9.90881e-27	53.9005
DUBR	-1.6298	2.35276	-11.7975	1.68366e-28	9.91922e-27	53.898
TGFBR2	-79.0637	147.798	-11.7898	1.80733e-28	1.06316e-26	53.8279
ZNF436	-7.87856	15.0749	-11.7869	1.85685e-28	1.09063e-26	53.8012
PABPC4L	-1.68273	1.61965	-11.7729	2.11438e-28	1.24001e-26	53.6727
NEURL1B	-18.7009	23.8576	-11.7675	2.22288e-28	1.30166e-26	53.6233
MID2	-6.23845	8.66806	-11.7661	2.25287e-28	1.31723e-26	53.61
FGD5	-8.27348	12.5885	-11.7605	2.37322e-28	1.3855e-26	53.5585
ZNF582-DT	-1.04221	1.28592	-11.7578	2.4334e-28	1.41849e-26	53.5338
SGIP1	-1.50278	2.27133	-11.7503	2.60782e-28	1.51559e-26	53.4653
PDGFRA	-19.5335	26.6685	-11.7493	2.63302e-28	1.52794e-26	53.4558
FAM110D	-12.7386	13.4219	-11.7431	2.78853e-28	1.61576e-26	53.3991
NOD1	-4.17843	7.27918	-11.7371	2.94861e-28	1.70595e-26	53.3439
LRRC17	-5.84508	6.13748	-11.7362	2.97308e-28	1.71754e-26	53.3357
PTPRB	-5.60812	9.36868	-11.7338	3.04002e-28	1.75359e-26	53.3137
MEIS1	-9.94369	10.6099	-11.7265	3.25102e-28	1.87251e-26	53.2474
LGI4	-9.39458	9.40514	-11.7233	3.35006e-28	1.92669e-26	53.2177
PGM5P4	-7.28885	7.466	-11.7218	3.39449e-28	1.94933e-26	53.2047
TCP11L1	-3.92698	7.09635	-11.7215	3.40476e-28	1.95233e-26	53.2017
CCN2	-287.115	328.987	-11.7207	3.43158e-28	1.9648e-26	53.1939
GIPC3	-2.08503	3.82619	-11.7191	3.48295e-28	1.99126e-26	53.1792
ADCY9	-7.02833	12.8143	-11.7179	3.52049e-28	2.00975e-26	53.1686
USP51	-1.47729	1.89748	-11.7171	3.5468e-28	2.02178e-26	53.1613
DSEL	-1.91171	2.15351	-11.7158	3.58966e-28	2.0432e-26	53.1494
STARD9	-4.03519	4.13358	-11.7093	3.81325e-28	2.16727e-26	53.0896
ADD1	-18.8293	47.0171	-11.7043	3.99214e-28	2.26561e-26	53.0443
GJA5	-6.87582	9.0726	-11.7019	4.08371e-28	2.31418e-26	53.0219
EPAS1	-65.0376	105.342	-11.6872	4.67711e-28	2.64081e-26	52.8877
GNAI2	-45.4831	108.639	-11.6871	4.68059e-28	2.64081e-26	52.887
MAP6	-4.36532	4.08234	-11.6858	4.73717e-28	2.66884e-26	52.8751
LGI2	-8.71027	8.07923	-11.6777	5.10354e-28	2.87106e-26	52.8015
TMEM43	-33.8709	70.3854	-11.6773	5.12573e-28	2.87935e-26	52.7972
SCN2B	-1.25109	1.02352	-11.6725	5.35526e-28	3.00392e-26	52.7539
GIMAP7	-31.7491	44.4021	-11.6686	5.55244e-28	3.11001e-26	52.7181
CASP4LP	-1.86544	2.88558	-11.6668	5.6448e-28	3.15717e-26	52.7018
PRMT2	-10.9461	27.4101	-11.6655	5.7117e-28	3.18997e-26	52.6901
PJA2	-44.8648	79.1207	-11.6579	6.12669e-28	3.41188e-26	52.6208
FLT4	-3.69261	5.86092	-11.6533	6.39328e-28	3.55521e-26	52.5787
LTBP4	-77.8545	110.056	-11.6529	6.42019e-28	3.56505e-26	52.5745
PEAK1	-5.11397	9.70343	-11.6509	6.53957e-28	3.62613e-26	52.5563
PBX3	-20.545	23.8649	-11.6495	6.62287e-28	3.66706e-26	52.5438
GPBAR1	-7.11924	7.08151	-11.6417	7.11915e-28	3.93621e-26	52.4724
LAMB2	-56.9522	96.6341	-11.6272	8.13067e-28	4.48906e-26	52.341
MEF2D	-18.4116	43.7518	-11.6231	8.44613e-28	4.65658e-26	52.3034
GSN	-140.575	207.494	-11.6213	8.59127e-28	4.72985e-26	52.2865
GPR183	-26.3319	36.4376	-11.6168	8.95057e-28	4.92065e-26	52.246
FTO	-3.68339	8.7921	-11.6161	9.01268e-28	4.94776e-26	52.2392
PWAR5	-1.50283	1.90179	-11.6054	9.94448e-28	5.45155e-26	52.1419
TLN1	-116.942	169.714	-11.5966	1.07844e-27	5.89527e-26	52.0617
CBX6	-24.9649	31.3092	-11.5934	1.11041e-27	6.06145e-26	52.0329
HCFC2	-5.47481	9.67983	-11.5901	1.14442e-27	6.23827e-26	52.003
TLE4	-4.38445	9.79744	-11.5876	1.17077e-27	6.37293e-26	51.9805
FRMD4A	-2.57296	4.65117	-11.5847	1.2023e-27	6.5354e-26	51.9542
NOTCH3	-44.3099	63.4174	-11.5844	1.20566e-27	6.54441e-26	51.9515
GHR	-6.54476	5.10869	-11.5657	1.43263e-27	7.76553e-26	51.781
SMARCD3	-6.87551	10.591	-11.5627	1.47256e-27	7.97077e-26	51.7538
MEIS3	-4.56907	5.9135	-11.5507	1.64351e-27	8.87126e-26	51.6452
DOCK11	-11.0073	16.3019	-11.5494	1.66288e-27	8.9633e-26	51.6336
CEP112	-2.36098	3.33615	-11.548	1.68458e-27	9.06762e-26	51.6208
NHLRC4	-1.07704	1.68776	-11.5355	1.89061e-27	1.01625e-25	51.5067
NAP1L5	-6.38129	8.86483	-11.535	1.89774e-27	1.01867e-25	51.503
SLC39A13	-12.3566	31.0585	-11.5249	2.08281e-27	1.11646e-25	51.411
LRP1	-52.7232	69.4207	-11.522	2.13936e-27	1.1436e-25	51.3845
PRKCH	-4.7414	9.23922	-11.5182	2.21382e-27	1.18177e-25	51.3507
ARID5A	-22.812	34.845	-11.5176	2.22659e-27	1.18694e-25	51.345
AMOTL1	-18.9936	21.8768	-11.513	2.32259e-27	1.23641e-25	51.3033
ARL15	-5.82401	15.5681	-11.5065	2.46471e-27	1.31026e-25	51.2446
PNRC1	-49.5123	118.473	-11.5046	2.5075e-27	1.33118e-25	51.2276
PARD3B	-3.96936	8.01865	-11.5041	2.52071e-27	1.33635e-25	51.2224
C1QTNF4	-2.57609	2.41911	-11.5035	2.53278e-27	1.34092e-25	51.2177
NUMBL	-8.8371	14.4761	-11.5016	2.57871e-27	1.36336e-25	51.1999
ANKDD1A	-2.03873	3.49373	-11.5014	2.58275e-27	1.36364e-25	51.1983
KLHDC1	-2.36678	4.07304	-11.489	2.8932e-27	1.52546e-25	51.0861
TSHZ2	-5.62617	6.59679	-11.4833	3.04807e-27	1.60493e-25	51.0346
TMEM240	-3.33229	4.08077	-11.4766	3.24034e-27	1.70385e-25	50.9741
PHC1P1	-1.12847	1.76332	-11.473	3.35083e-27	1.75955e-25	50.941
SNED1	-5.58926	5.5797	-11.4642	3.63117e-27	1.90417e-25	50.8615
CLSTN3	-13.2449	23.0457	-11.462	3.70352e-27	1.93948e-25	50.842
ATF7	-5.03534	14.9904	-11.458	3.84021e-27	2.00834e-25	50.8062
CPED1	-23.8476	21.916	-11.457	3.87718e-27	2.02494e-25	50.7967
GNAO1	-11.0399	9.02133	-11.4552	3.9401e-27	2.05502e-25	50.7808
CADM3	-5.74095	5.21779	-11.454	3.98359e-27	2.0749e-25	50.77
NISCH	-12.3071	29.67	-11.4518	4.06617e-27	2.11405e-25	50.7497
FAM228B	-1.40946	2.53907	-11.4517	4.06969e-27	2.11405e-25	50.7488
CHRDL1	-44.4121	29.4478	-11.4413	4.47645e-27	2.32223e-25	50.6547
NACAD	-2.8978	3.02985	-11.4382	4.60154e-27	2.38392e-25	50.6274
PRDM6	-1.13892	1.05378	-11.4306	4.93234e-27	2.55187e-25	50.5588
DSE	-3.81018	6.30209	-11.4292	4.99559e-27	2.58115e-25	50.5462
BMERB1	-14.574	18.7145	-11.4257	5.15775e-27	2.66137e-25	50.5146
PHC1	-5.33737	9.32811	-11.4252	5.18504e-27	2.67188e-25	50.5094
PDE4DIPP2	-3.62736	6.26495	-11.4244	5.22071e-27	2.68668e-25	50.5026
FCHSD2	-8.94879	21.2084	-11.4225	5.31334e-27	2.73072e-25	50.4853
GPR34	-13.8475	18.2203	-11.4221	5.33162e-27	2.73647e-25	50.4819
WTIP	-2.65447	3.50414	-11.4168	5.59649e-27	2.86861e-25	50.4339
MMRN1	-11.9904	11.1971	-11.4139	5.74824e-27	2.94249e-25	50.4075
DCLK2	-5.98402	5.81091	-11.4128	5.80619e-27	2.96822e-25	50.3976
SH3PXD2B	-18.9859	25.5274	-11.4111	5.89502e-27	3.00965e-25	50.3826
SLC22A17	-10.9771	12.9852	-11.4101	5.94686e-27	3.03211e-25	50.3739
ASPA	-2.11172	2.52395	-11.4099	5.96002e-27	3.03482e-25	50.3717
DIP2C	-9.20521	13.5869	-11.4079	6.06776e-27	3.08562e-25	50.354
NPR1	-13.2441	11.0253	-11.3949	6.83432e-27	3.47087e-25	50.2364
TGFB1I1	-40.0279	41.8535	-11.3934	6.92879e-27	3.51423e-25	50.2229
GAB1	-4.73129	9.8734	-11.382	7.6844e-27	3.89236e-25	50.1205
SELENOM	-77.4606	99.267	-11.369	8.64719e-27	4.3743e-25	50.0039
SFMBT2	-2.51965	4.66906	-11.3653	8.94036e-27	4.51669e-25	49.9709
EZH1	-6.9142	15.8665	-11.3528	1.00205e-26	5.05579e-25	49.8582
C1orf216	-7.16059	12.398	-11.3502	1.02616e-26	5.17065e-25	49.8347
FAM171B	-3.07872	4.89308	-11.3458	1.06743e-26	5.37163e-25	49.7957
SGCE	-29.3052	37.3677	-11.3378	1.14793e-26	5.76918e-25	49.7238
FYN	-10.3775	20.3749	-11.3316	1.21474e-26	6.09706e-25	49.6679
SUN2	-21.9255	52.7736	-11.3302	1.23029e-26	6.16709e-25	49.6554
PRICKLE2	-8.47574	8.37544	-11.3276	1.26e-26	6.30782e-25	49.6318
TNXB	-21.8516	19.2607	-11.3103	1.47436e-26	7.37143e-25	49.4765
NUAK1	-6.99588	9.88261	-11.3086	1.49639e-26	7.4719e-25	49.4618
C3orf18	-4.80424	7.82553	-11.3045	1.55399e-26	7.73952e-25	49.4245
TOR1AIP1	-11.0114	24.7505	-11.2966	1.66889e-26	8.30107e-25	49.354
LMO3	-3.41297	3.04744	-11.2958	1.68131e-26	8.35207e-25	49.3467
SMPD1	-11.8536	32.4702	-11.2955	1.68509e-26	8.36012e-25	49.3444
NDST1	-16.0866	32.7077	-11.2932	1.72051e-26	8.52489e-25	49.3239
CD81	-71.8194	146.578	-11.293	1.72352e-26	8.52888e-25	49.3222
F2R	-39.8696	57.9402	-11.2913	1.75144e-26	8.65599e-25	49.3063
PLEKHO1	-29.6025	36.3836	-11.2853	1.84839e-26	9.11182e-25	49.253
CLMP	-34.5165	31.8238	-11.2806	1.92882e-26	9.49616e-25	49.2109
TUBB6	-53.4375	62.8227	-11.2803	1.9348e-26	9.51352e-25	49.2079
SOBP	-5.75923	7.04573	-11.2797	1.94439e-26	9.54852e-25	49.203
SMO	-8.90841	12.6043	-11.2702	2.11901e-26	1.03928e-24	49.118
UBE2E2	-8.90667	15.4364	-11.2682	2.15779e-26	1.05696e-24	49.1001
CCDC50	-15.0362	29.2277	-11.2628	2.26639e-26	1.10875e-24	49.0515
COL21A1	-3.43757	3.1462	-11.2604	2.31718e-26	1.13217e-24	49.0296
ADGRF5	-12.5426	20.6602	-11.2571	2.38646e-26	1.16347e-24	49.0005
JMY	-5.40924	11.1985	-11.2571	2.38727e-26	1.16347e-24	49.0002
HLX	-2.81881	4.31091	-11.252	2.49987e-26	1.21616e-24	48.9546
GLRB	-2.93946	3.25099	-11.2519	2.50167e-26	1.21616e-24	48.9539
GDF6	-1.4251	1.20301	-11.2505	2.53242e-26	1.22956e-24	48.9418
DENND2A	-5.6497	7.99188	-11.2493	2.56128e-26	1.24201e-24	48.9306
LHFPL2	-12.6065	25.6805	-11.2445	2.67533e-26	1.29569e-24	48.8876
ARL2BP	-4.76357	10.2333	-11.2439	2.68998e-26	1.30115e-24	48.8822
ALDH1A3	-13.6128	14.967	-11.239	2.8112e-26	1.35809e-24	48.8386
SFRP4	-112.433	81.7892	-11.2382	2.8312e-26	1.36605e-24	48.8316
ARMCX4	-1.57197	2.5208	-11.2349	2.91777e-26	1.40606e-24	48.8019
RIN3	-6.76453	13.3839	-11.2325	2.97944e-26	1.43399e-24	48.7812
OLFML2B	-46.0224	43.1861	-11.2298	3.05314e-26	1.46763e-24	48.757
LATS2	-12.0414	22.9869	-11.2294	3.06471e-26	1.47137e-24	48.7533
ATP5PBP5	-1.0295	1.21576	-11.2289	3.07937e-26	1.47657e-24	48.7486
MEIS3P1	-9.4679	14.329	-11.2278	3.11024e-26	1.48953e-24	48.7387
NMUR1	-1.97024	2.33416	-11.2243	3.20908e-26	1.53496e-24	48.7078
ADCY5	-20.3628	17.949	-11.2234	3.2366e-26	1.5462e-24	48.6994
PKD1	-16.9385	21.9597	-11.2218	3.28176e-26	1.56585e-24	48.6857
LINC02256	-2.05463	2.65823	-11.2173	3.42041e-26	1.62999e-24	48.6448
MEF2A	-16.3991	29.5004	-11.2158	3.46435e-26	1.64889e-24	48.6322
ST6GALNAC6	-4.42815	6.23376	-11.2129	3.55664e-26	1.69074e-24	48.6062
TXNIP	-320.678	549.897	-11.2125	3.56938e-26	1.69471e-24	48.6027
NOTCH4	-6.42712	9.7424	-11.2036	3.87074e-26	1.83554e-24	48.5226
ITGA9	-16.6594	16.3603	-11.1927	4.27016e-26	2.02247e-24	48.4255
KATNAL1	-4.28058	5.9155	-11.1874	4.47603e-26	2.11738e-24	48.379
LDLRAD2	-1.63987	2.22687	-11.184	4.61578e-26	2.18081e-24	48.3486
WIPF1	-17.443	30.3174	-11.1818	4.70953e-26	2.22239e-24	48.3287
SCN1B	-4.16478	5.76327	-11.1814	4.72651e-26	2.22768e-24	48.3252
SEMA3G	-14.1973	12.7378	-11.1807	4.75666e-26	2.23916e-24	48.3189
ADAMTS1	-68.788	55.9564	-11.18	4.78481e-26	2.24968e-24	48.313
RNF150	-8.75424	7.41288	-11.1783	4.86028e-26	2.28238e-24	48.2976
CD99L2	-15.739	23.1679	-11.1774	4.89783e-26	2.29722e-24	48.29
ADAMTSL1	-2.34307	3.17497	-11.1757	4.9759e-26	2.32819e-24	48.2743
VEGFB	-58.2383	117.613	-11.1548	6.00335e-26	2.80214e-24	48.0888
PYGO1	-2.55317	3.05803	-11.1494	6.30193e-26	2.93796e-24	48.0409
PCDHGB6	-1.05146	1.30727	-11.1484	6.35906e-26	2.96103e-24	48.032
GPR146	-1.5235	1.91776	-11.1466	6.46639e-26	3.00738e-24	48.0154
ACTA2	-563.878	492.923	-11.144	6.6163e-26	3.0734e-24	47.9928
CRIM1	-27.4437	46.4163	-11.1422	6.72639e-26	3.12079e-24	47.9765
FILIP1L	-56.3834	67.3259	-11.1404	6.83846e-26	3.16898e-24	47.9601
FGF2	-7.36476	7.32792	-11.1397	6.87592e-26	3.18252e-24	47.9547
ZFP28	-1.54665	2.17553	-11.1329	7.31116e-26	3.37589e-24	47.8941
KCTD7	-3.70349	6.61979	-11.131	7.43965e-26	3.43112e-24	47.8769
SMOC2	-139.384	130.722	-11.1233	7.96802e-26	3.67042e-24	47.8091
LBH	-28.3324	50.268	-11.1231	7.98572e-26	3.67419e-24	47.8069
GNAL	-2.73011	3.31707	-11.1194	8.2517e-26	3.78755e-24	47.7745
ADAM19	-11.6473	18.8893	-11.1157	8.53102e-26	3.91111e-24	47.7416
MBNL1	-26.1084	56.5661	-11.1085	9.10033e-26	4.16717e-24	47.6778
CALCRL	-13.745	19.2527	-11.1079	9.15352e-26	4.18657e-24	47.672
CDON	-5.56195	5.06233	-11.1068	9.2445e-26	4.22319e-24	47.6623
TGFB1	-46.1245	87.3084	-11.1049	9.40652e-26	4.29213e-24	47.6451
RARRES2	-102.657	141.225	-11.0941	1.03615e-25	4.72231e-24	47.5495
GIMAP4	-26.536	44.7005	-11.0901	1.0733e-25	4.88585e-24	47.5147
PTPN5	-1.0183	1.03932	-11.0858	1.11638e-25	5.076e-24	47.4758
NR2F2	-32.6596	58.8997	-11.0776	1.20115e-25	5.455e-24	47.4035
PDLIM3	-62.0961	56.3709	-11.0743	1.23687e-25	5.61063e-24	47.3746
TWSG1	-23.6483	46.1106	-11.0705	1.27956e-25	5.79745e-24	47.341
SNRPN	-6.23433	7.32011	-11.0689	1.29782e-25	5.87331e-24	47.327
PDZD4	-8.98925	8.35061	-11.0662	1.32962e-25	6.0102e-24	47.3031
PIK3IP1	-17.3425	34.8475	-11.0636	1.36133e-25	6.14634e-24	47.2798
GUCY1A2	-1.42631	1.85445	-11.0593	1.41453e-25	6.37906e-24	47.242
MSRB3	-63.7928	56.4632	-11.0558	1.45966e-25	6.57494e-24	47.2109
PRSS23	-30.4818	40.4723	-11.0463	1.58999e-25	7.15364e-24	47.1264
FGF1	-1.71973	1.84804	-11.0446	1.61356e-25	7.25126e-24	47.1119
CMAHP	-5.32689	8.89579	-11.0433	1.63329e-25	7.33142e-24	47.0999
PLPPR2	-16.4389	29.1831	-11.0351	1.75758e-25	7.88014e-24	47.0274
ZNF570	-1.4307	2.54923	-11.0321	1.80491e-25	8.08296e-24	47.0012
RSPO1	-3.89807	3.00383	-11.022	1.97564e-25	8.83733e-24	46.9119
ATL1	-2.59328	4.47475	-11.0157	2.08988e-25	9.33754e-24	46.8563
BEX4	-34.6238	48.5772	-11.0153	2.09739e-25	9.35701e-24	46.8528
MMP23B	-2.38429	2.40303	-11.0152	2.09908e-25	9.35701e-24	46.852
SH3PXD2A	-18.3055	31.0047	-11.0132	2.13708e-25	9.51542e-24	46.8342
GIT2	-2.45974	6.21329	-11.0073	2.25154e-25	1.00135e-23	46.7827
EVL	-9.87941	16.4873	-10.9995	2.41508e-25	1.07285e-23	46.7134
IRF2BPL	-20.8794	41.7822	-10.997	2.46833e-25	1.09525e-23	46.6919
DYSF	-9.0857	14.469	-10.9963	2.48528e-25	1.1015e-23	46.6851
FHL3	-17.827	34.6773	-10.9939	2.53929e-25	1.12415e-23	46.6639
C4B	-10.7371	11.0976	-10.9919	2.58502e-25	1.14178e-23	46.6462
CTDSP2	-45.8134	119.066	-10.9865	2.71174e-25	1.19638e-23	46.599
CCDC92	-5.93199	13.8844	-10.9766	2.96059e-25	1.30468e-23	46.5122
TRAK2	-9.6277	22.5643	-10.9703	3.13302e-25	1.3791e-23	46.4563
KCNIP1	-1.18262	1.06748	-10.9691	3.16581e-25	1.39195e-23	46.446
C1QTNF7	-8.00609	6.60368	-10.9666	3.23896e-25	1.42249e-23	46.4234
ITGA7	-41.7937	37.6108	-10.9643	3.30565e-25	1.45014e-23	46.4033
CLIP4	-7.18003	9.51926	-10.9609	3.40548e-25	1.49199e-23	46.3739
PTPN21	-5.21106	11.8123	-10.9608	3.40878e-25	1.49199e-23	46.3729
ZNF471	-2.01217	2.48329	-10.943	3.99291e-25	1.7437e-23	46.2167
ZNF71	-2.3373	3.94803	-10.9408	4.07468e-25	1.77741e-23	46.1967
SEMA6B	-13.4885	17.6743	-10.9372	4.2043e-25	1.83188e-23	46.1657
CCDC184	-1.36295	1.91051	-10.9364	4.23435e-25	1.84289e-23	46.1587
COL5A1	-81.1975	101.133	-10.9354	4.27186e-25	1.85713e-23	46.15
MARF1	-8.25092	23.8686	-10.9345	4.30961e-25	1.87143e-23	46.1413
TECPR2	-4.51406	10.0037	-10.9319	4.40844e-25	1.9122e-23	46.1189
EDNRB	-8.59301	14.2541	-10.9309	4.44888e-25	1.92758e-23	46.1099
TDRD10	-1.7106	2.01384	-10.9243	4.71804e-25	2.04191e-23	46.0518
SPRY1	-30.0361	47.2438	-10.9212	4.84653e-25	2.09517e-23	46.0253
RIPOR1	-12.0539	26.8775	-10.9211	4.85444e-25	2.09625e-23	46.0237
GINM1	-18.1922	52.1564	-10.9193	4.93277e-25	2.1277e-23	46.0079
RGMA	-24.0096	19.2911	-10.9165	5.05745e-25	2.17904e-23	45.9832
NAP1L2	-3.51542	3.72112	-10.9129	5.21939e-25	2.24631e-23	45.9521
MDGA1	-1.83123	2.29989	-10.9126	5.23317e-25	2.24974e-23	45.9495
GPX8	-13.9368	19.551	-10.9123	5.24707e-25	2.25321e-23	45.9468
ESAM	-23.0339	41.467	-10.912	5.26295e-25	2.25752e-23	45.9438
GPR135	-1.69915	2.00343	-10.9118	5.2695e-25	2.25782e-23	45.9426
AP1M1	-3.16617	8.66989	-10.9108	5.32024e-25	2.27704e-23	45.9332
CAND2	-4.52149	4.43849	-10.9095	5.37798e-25	2.29921e-23	45.9225
RAB8B	-10.3095	23.4043	-10.9063	5.53656e-25	2.36438e-23	45.8938
SFRP1	-48.2756	38.8763	-10.9013	5.78437e-25	2.46749e-23	45.8505
PCDH12	-4.09733	7.0349	-10.901	5.79878e-25	2.47091e-23	45.8481
PHLDB2	-11.7857	13.2732	-10.8969	6.01818e-25	2.56157e-23	45.8114
GGTLC4P	-1.171	1.13792	-10.8942	6.1604e-25	2.61922e-23	45.7883
DIO2	-17.3273	18.9471	-10.8895	6.42338e-25	2.72803e-23	45.747
VPS35L	-3.99532	10.1014	-10.8881	6.50243e-25	2.75857e-23	45.7349
CILP	-33.7474	24.1121	-10.8789	7.05765e-25	2.99084e-23	45.654
CALHM5	-2.43892	3.14044	-10.8724	7.47481e-25	3.16068e-23	45.5973
PPP1R18	-25.0977	48.9177	-10.8666	7.87038e-25	3.32431e-23	45.5463
ISCU	-19.0377	58.5499	-10.8609	8.27627e-25	3.49194e-23	45.4966
ANKRD53	-1.23615	1.55802	-10.8607	8.29217e-25	3.49483e-23	45.4947
GJC1	-6.77557	7.55952	-10.8602	8.33286e-25	3.50815e-23	45.4899
TACC1	-27.6712	45.07	-10.8543	8.77258e-25	3.68926e-23	45.4391
LOXL3	-2.63323	5.01694	-10.8538	8.81399e-25	3.70264e-23	45.4345
SH2B3	-14.627	31.2093	-10.8529	8.8892e-25	3.73018e-23	45.4261
SOCS5	-7.832	17.9831	-10.8506	9.06934e-25	3.79753e-23	45.4062
ST3GAL3	-1.98159	2.63858	-10.8482	9.26553e-25	3.87548e-23	45.3851
SNX1	-9.88838	31.2866	-10.845	9.52916e-25	3.98144e-23	45.3574
CCDC69	-47.8426	55.5069	-10.8441	9.60847e-25	4.00591e-23	45.3492
PDE1B	-2.96146	3.02179	-10.8407	9.90208e-25	4.12387e-23	45.3195
SGTB	-2.75134	5.65907	-10.8376	1.01742e-24	4.23265e-23	45.2927
KLHL29	-2.90116	4.10555	-10.8321	1.068e-24	4.43828e-23	45.2448
MITF	-4.439	8.94826	-10.8319	1.06985e-24	4.44119e-23	45.2431
TMOD2	-4.04015	5.91095	-10.8283	1.10483e-24	4.5815e-23	45.2113
MYO9A	-2.71105	5.56968	-10.825	1.13724e-24	4.71082e-23	45.1827
PLPPR4	-4.59301	3.83403	-10.8219	1.16876e-24	4.83623e-23	45.1557
MEX3B	-2.52967	3.7869	-10.8176	1.21405e-24	5.01823e-23	45.1182
PRX	-2.15143	3.78102	-10.8166	1.22526e-24	5.05918e-23	45.1091
PIP5K1C	-21.5943	39.6246	-10.8153	1.23893e-24	5.11017e-23	45.0981
NIPSNAP3B	-2.93024	3.49868	-10.8127	1.26775e-24	5.2179e-23	45.0754
SHROOM4	-3.31783	5.08517	-10.8062	1.34287e-24	5.5212e-23	45.0185
PRKN	-1.84751	2.38886	-10.8051	1.35543e-24	5.56691e-23	45.0093
PIK3R1	-11.1026	21.3869	-10.8044	1.36447e-24	5.59809e-23	45.0028
ZNF641	-3.17752	8.23982	-10.8006	1.41092e-24	5.78253e-23	44.9697
ABL1	-33.5389	65.9435	-10.7995	1.42478e-24	5.83313e-23	44.9601
CRYBB1	-1.34326	1.98146	-10.799	1.43091e-24	5.85205e-23	44.9558
PRCP	-8.13657	18.3263	-10.7986	1.4362e-24	5.86748e-23	44.9522
CFH	-37.9104	45.7746	-10.7944	1.49006e-24	6.08109e-23	44.9158
NID2	-11.6143	16.1725	-10.7869	1.59254e-24	6.49244e-23	44.8501
PLXNA4	-3.35756	2.75706	-10.7821	1.6612e-24	6.76523e-23	44.8084
DACT3	-21.3664	18.5157	-10.7794	1.70083e-24	6.91935e-23	44.7851
RBMS3-AS3	-1.08579	1.08961	-10.7787	1.71115e-24	6.95399e-23	44.7792
CCDC89	-1.1652	1.75277	-10.775	1.76813e-24	7.17802e-23	44.7468
CLEC10A	-10.1752	12.4395	-10.7739	1.78531e-24	7.24016e-23	44.7372
SFRP2	-458.422	326.207	-10.7736	1.79073e-24	7.25453e-23	44.7343
PDE3A	-12.8038	13.1646	-10.7733	1.7954e-24	7.26581e-23	44.7317
KLHL20	-4.94136	14.4351	-10.7666	1.9044e-24	7.69886e-23	44.6735
RNF146	-9.89967	25.8515	-10.7616	1.9889e-24	8.03207e-23	44.6306
RNF122	-13.1575	18.4277	-10.7592	2.0326e-24	8.19998e-23	44.6091
DPYSL2	-19.6182	36.6856	-10.7559	2.0916e-24	8.42921e-23	44.5809
PDGFC	-6.48362	11.517	-10.7544	2.11961e-24	8.53318e-23	44.5677
ZFYVE1	-3.86474	12.2911	-10.7531	2.14434e-24	8.62378e-23	44.5563
NFIC	-28.8265	54.0256	-10.7506	2.19209e-24	8.80664e-23	44.5345
RASD2	-7.11156	7.85361	-10.7477	2.24794e-24	9.02164e-23	44.5097
TMOD1	-9.18748	9.05819	-10.7461	2.27998e-24	9.14075e-23	44.4957
NRP2	-18.9081	21.0594	-10.7355	2.50314e-24	1.00146e-22	44.4035
GAS6	-34.3232	65.4883	-10.7345	2.52563e-24	1.00942e-22	44.3946
PTH1R	-2.92425	2.66197	-10.7322	2.57805e-24	1.0293e-22	44.3743
CAVIN3	-38.9196	63.918	-10.7141	3.02138e-24	1.20506e-22	44.2176
NFIX	-36.0725	64.4214	-10.7116	3.08856e-24	1.22993e-22	44.1959
ETS1	-30.2995	57.4555	-10.7115	3.09009e-24	1.22993e-22	44.1954
ZSCAN26	-4.75124	10.6491	-10.7077	3.19684e-24	1.27111e-22	44.1619
CLEC2B	-8.9004	15.991	-10.7	3.42061e-24	1.35868e-22	44.095
PCDH17	-4.85231	7.70868	-10.6987	3.4601e-24	1.37296e-22	44.0837
FAXDC2	-8.92285	10.8966	-10.696	3.54044e-24	1.40339e-22	44.061
LINC00921	-1.1559	2.35488	-10.6957	3.5503e-24	1.40586e-22	44.0583
HHIPL1	-1.95272	2.641	-10.6954	3.55897e-24	1.40785e-22	44.0559
PURA	-3.83353	11.8003	-10.6945	3.58961e-24	1.41852e-22	44.0474
FYCO1	-18.3491	29.0698	-10.6919	3.67179e-24	1.44951e-22	44.0251
SEMA6C	-4.20031	6.27702	-10.6896	3.7446e-24	1.47524e-22	44.0057
MRGPRF	-57.4317	50.5067	-10.6891	3.76372e-24	1.4807e-22	44.0006
ADAMTS9-AS2	-1.23046	1.21988	-10.689	3.76611e-24	1.4807e-22	44
MEG3	-8.81299	9.39661	-10.6773	4.17091e-24	1.63818e-22	43.8992
TCF7L1	-7.68463	9.89265	-10.6769	4.18838e-24	1.64338e-22	43.8951
WLS	-30.3559	57.1472	-10.6745	4.27653e-24	1.67626e-22	43.8745
OGFRL1	-5.9043	11.5201	-10.6672	4.55753e-24	1.7846e-22	43.8116
CD248	-61.806	64.7937	-10.6572	4.97581e-24	1.94641e-22	43.7249
COL6A1	-277.035	368.294	-10.6567	4.99793e-24	1.95308e-22	43.7205
VIPR2	-3.54577	3.18509	-10.6536	5.13685e-24	2.00379e-22	43.6935
THBD	-38.6019	42.9751	-10.6535	5.13805e-24	2.00379e-22	43.6932
GFRA2	-1.55777	1.85469	-10.6513	5.24187e-24	2.04221e-22	43.6735
AMPH	-2.22851	2.45412	-10.6488	5.35576e-24	2.08448e-22	43.6523
CHST12	-1.65917	4.95084	-10.6443	5.57165e-24	2.16633e-22	43.6132
PIGCP1	-5.29541	8.70292	-10.6357	6.00817e-24	2.33371e-22	43.5387
ATP6V0CP3	-1.71176	1.76708	-10.6284	6.40313e-24	2.48462e-22	43.4759
SGCB	-18.782	38.2411	-10.6213	6.8086e-24	2.63666e-22	43.4152
SYNC	-11.1252	9.05897	-10.6208	6.84242e-24	2.6471e-22	43.4103
PLVAP	-99.6965	215.77	-10.6108	7.46323e-24	2.88439e-22	43.3246
AASS	-3.78014	6.07795	-10.6105	7.48465e-24	2.88978e-22	43.3217
LINC02550	-1.71519	1.69268	-10.6103	7.49819e-24	2.89212e-22	43.32
DNAJB4	-16.3164	23.3656	-10.6049	7.85789e-24	3.02783e-22	43.2737
WNT2B	-3.211	3.5692	-10.6015	8.09589e-24	3.11643e-22	43.2442
YPEL5	-23.1911	66.8096	-10.5974	8.39301e-24	3.22438e-22	43.2086
PLXNC1	-6.44229	10.1795	-10.588	9.10724e-24	3.49183e-22	43.128
SALL2	-5.55862	5.33112	-10.5817	9.61914e-24	3.68445e-22	43.074
SENP7	-4.07895	9.95428	-10.5797	9.79459e-24	3.74793e-22	43.0561
GNA12	-15.4228	38.2719	-10.5726	1.04186e-23	3.98276e-22	42.9951
TP73-AS1	-4.03298	7.29422	-10.5705	1.06128e-23	4.053e-22	42.9769
PLAT	-19.871	38.5639	-10.5574	1.18865e-23	4.526e-22	42.865
STX2	-9.19828	16.8524	-10.5557	1.20711e-23	4.59175e-22	42.8498
FKBP14	-5.44849	12.2197	-10.5514	1.25232e-23	4.75906e-22	42.8135
PGM5P4-AS1	-1.81995	1.4172	-10.5446	1.32882e-23	5.04482e-22	42.7549
LDOC1	-21.5994	24.5728	-10.5395	1.3889e-23	5.26774e-22	42.7113
SNX18	-8.21703	22.8528	-10.5316	1.48843e-23	5.63969e-22	42.6429
EOGT	-9.92193	17.3302	-10.53	1.50955e-23	5.71412e-22	42.629
MTR	-5.50462	13.7777	-10.5279	1.53707e-23	5.8126e-22	42.6112
THBS1	-206.621	179.226	-10.5235	1.59655e-23	6.01983e-22	42.5737
KLF11	-8.50957	17.0388	-10.5206	1.63745e-23	6.16205e-22	42.5487
MAP7D1	-40.8587	76.4021	-10.5183	1.67038e-23	6.27985e-22	42.529
TMEM88	-12.1648	15.8792	-10.5091	1.80948e-23	6.79621e-22	42.4501
PHF1	-15.4939	39.0099	-10.5047	1.88013e-23	7.04818e-22	42.4123
INAFM1	-21.1143	42.5873	-10.5047	1.88022e-23	7.04818e-22	42.4122
GABARAPL1	-22.9279	47.4536	-10.5043	1.8858e-23	7.06224e-22	42.4093
FOLR2	-38.5612	42.0185	-10.5025	1.91669e-23	7.171e-22	42.3932
RASGRP4	-1.9273	3.01273	-10.4997	1.96381e-23	7.34016e-22	42.3693
ZFHX4	-2.58477	2.40462	-10.4983	1.98682e-23	7.41901e-22	42.3578
TMCC2	-1.33029	2.06715	-10.4948	2.04776e-23	7.63916e-22	42.3279
CCL14	-1.43708	1.31861	-10.4929	2.08283e-23	7.76251e-22	42.3112
PTGER1	-8.27979	9.18746	-10.4891	2.15154e-23	8.01087e-22	42.2791
A2M-AS1	-1.99042	2.41903	-10.4883	2.16756e-23	8.06273e-22	42.2718
GAS1	-37.1642	31.3287	-10.4828	2.27354e-23	8.44883e-22	42.2247
COLQ	-1.08594	1.59892	-10.478	2.36941e-23	8.79664e-22	42.1839
NRROS	-4.99793	8.10172	-10.4779	2.37194e-23	8.79757e-22	42.1828
PCNX1	-5.639	12.5065	-10.4751	2.43047e-23	9.00602e-22	42.1588
EVA1B	-20.6967	41.2792	-10.4748	2.43547e-23	9.01591e-22	42.1567
CCSER2	-9.92296	20.2661	-10.4731	2.47175e-23	9.14145e-22	42.1421
INPP4A	-3.74366	9.44073	-10.4727	2.48018e-23	9.16387e-22	42.1388
FXYD1	-1.22614	0.829789	-10.4693	2.55537e-23	9.43264e-22	42.1093
MPRIP	-11.1046	34.0677	-10.4679	2.5858e-23	9.53586e-22	42.0976
SUFU	-3.52849	9.4406	-10.4659	2.63083e-23	9.69268e-22	42.0805
NAV1	-3.62129	6.86795	-10.4651	2.6494e-23	9.75181e-22	42.0736
ITM2A	-31.5067	49.1939	-10.4637	2.68264e-23	9.86475e-22	42.0613
IL11RA	-4.35784	7.04959	-10.4599	2.77122e-23	1.01808e-21	42.0292
MXRA7P1	-30.5906	42.6728	-10.4547	2.90029e-23	1.06449e-21	41.9843
PALMD	-6.60849	5.98922	-10.4544	2.90626e-23	1.06566e-21	41.9822
HIP1	-7.39998	15.2579	-10.452	2.96688e-23	1.08686e-21	41.9619
ZNF671	-2.51323	4.47832	-10.4501	3.01618e-23	1.10388e-21	41.9456
PGR	-1.18243	1.13505	-10.4461	3.12425e-23	1.14235e-21	41.9108
PPM1K	-3.38381	6.99272	-10.4432	3.20337e-23	1.17017e-21	41.8861
RNASE6	-27.3564	42.7679	-10.4417	3.2445e-23	1.18407e-21	41.8736
CRTC3	-9.27441	17.1631	-10.4414	3.25153e-23	1.18552e-21	41.8714
ARMC9	-3.89637	5.66516	-10.441	3.26491e-23	1.18918e-21	41.8674
LAMB1	-41.5929	80.964	-10.4409	3.26772e-23	1.18918e-21	41.8665
CRYAB	-44.4735	39.8067	-10.4406	3.27549e-23	1.19089e-21	41.8642
LIMS2	-23.5997	22.6878	-10.4402	3.28626e-23	1.19368e-21	41.8609
ITGA1	-21.5826	26.1132	-10.4327	3.50512e-23	1.27198e-21	41.7973
FAM107A	-10.1611	9.25459	-10.4307	3.56605e-23	1.29288e-21	41.7803
DUSP26	-2.79993	3.32151	-10.4302	3.58223e-23	1.29752e-21	41.7758
ZNF667-AS1	-4.4791	5.09064	-10.4225	3.82936e-23	1.38574e-21	41.7099
KLRG1	-1.68992	2.63514	-10.4216	3.86072e-23	1.39578e-21	41.7019
HDAC5	-10.154	23.2228	-10.4179	3.9833e-23	1.43741e-21	41.671
MAP4	-23.2061	52.3202	-10.3992	4.68201e-23	1.68797e-21	41.5115
LRRK2	-2.82345	4.20122	-10.397	4.77194e-23	1.71719e-21	41.4927
ABCA1	-8.56347	15.78	-10.3965	4.79274e-23	1.72307e-21	41.4884
ARHGAP15	-2.87023	4.18253	-10.3903	5.05719e-23	1.81645e-21	41.4354
CERCAM	-19.8897	27.4097	-10.3886	5.12791e-23	1.84014e-21	41.4217
SNHG14	-1.89493	2.4638	-10.3867	5.21614e-23	1.87007e-21	41.4048
PRKCB	-9.57061	10.3417	-10.3865	5.22217e-23	1.8705e-21	41.4037
HOOK3	-6.8528	14.7821	-10.3808	5.48519e-23	1.96289e-21	41.3552
SGCA	-14.2267	13.3092	-10.3734	5.84657e-23	2.09027e-21	41.2922
SYNGAP1	-3.1083	6.43613	-10.3668	6.18773e-23	2.20816e-21	41.2362
INSYN1	-2.27116	2.39791	-10.3634	6.37372e-23	2.27034e-21	41.207
NSMCE3	-11.4755	32.5676	-10.3626	6.41996e-23	2.2847e-21	41.1998
KCTD15	-9.29868	14.7342	-10.3604	6.53835e-23	2.32469e-21	41.1818
NKAPL	-1.26206	1.38413	-10.3567	6.75257e-23	2.39865e-21	41.15
CHST14	-6.26851	14.9309	-10.3547	6.86688e-23	2.43478e-21	41.1334
FAM167B	-8.02685	15.8797	-10.3515	7.0603e-23	2.50107e-21	41.106
ARHGEF40	-9.0224	20.2917	-10.3363	8.04668e-23	2.84787e-21	40.9769
ITIH3	-1.50905	1.1436	-10.3359	8.0739e-23	2.8549e-21	40.9736
RAB12	-14.3451	33.1729	-10.333	8.27483e-23	2.92327e-21	40.9493
HTRA1	-117.073	167.047	-10.3227	9.04032e-23	3.19078e-21	40.862
SAMD4A	-8.86597	9.64332	-10.3166	9.52581e-23	3.35907e-21	40.8103
C1orf162	-10.5337	15.7023	-10.3165	9.53939e-23	3.36079e-21	40.8089
PINK1	-7.49704	18.7192	-10.3138	9.76001e-23	3.43226e-21	40.7864
PIP4P2	-8.85919	12.8761	-10.3128	9.84208e-23	3.45483e-21	40.7781
EFS	-7.91817	10.0295	-10.3116	9.94324e-23	3.48717e-21	40.768
MS4A6A	-17.087	27.0761	-10.3103	1.00549e-22	3.52315e-21	40.757
C11orf96	-111.794	116.874	-10.3084	1.02219e-22	3.57841e-21	40.7407
LINC01150	-1.79367	2.22211	-10.3066	1.03827e-22	3.6314e-21	40.7253
ATP6V1G2	-1.18948	1.3776	-10.3044	1.05781e-22	3.69642e-21	40.7069
TGFBR3	-12.9079	17.3924	-10.3035	1.06595e-22	3.72148e-21	40.6993
DIXDC1	-19.9335	20.6414	-10.3001	1.09757e-22	3.82843e-21	40.6705
TRIM23	-3.11301	7.1788	-10.2913	1.18378e-22	4.12542e-21	40.5958
ZNF540	-1.05914	1.77079	-10.2868	1.23052e-22	4.28443e-21	40.5576
SAP30L	-6.22709	18.2328	-10.2814	1.28809e-22	4.48082e-21	40.5125
IQSEC1	-13.6568	30.3638	-10.2796	1.30857e-22	4.54798e-21	40.4969
RTN1	-2.79539	3.61888	-10.2769	1.33933e-22	4.65071e-21	40.474
FGD1	-5.30836	9.21161	-10.275	1.36027e-22	4.71495e-21	40.4587
C14orf28	-2.48847	5.50622	-10.2716	1.40067e-22	4.85063e-21	40.4298
HIPK3	-22.2808	48.2794	-10.2667	1.4614e-22	5.05642e-21	40.3879
TSPAN18	-22.9498	25.03	-10.2653	1.47847e-22	5.11091e-21	40.3764
VAMP2	-16.7834	46.9857	-10.2524	1.65102e-22	5.70227e-21	40.2675
PHYHIP	-2.12227	2.32654	-10.2514	1.66566e-22	5.74771e-21	40.2588
CALD1	-297.204	282.405	-10.2499	1.68653e-22	5.81453e-21	40.2465
CNN3-DT	-10.1705	14.6849	-10.248	1.71481e-22	5.90151e-21	40.2301
LINC00294	-4.37753	8.52948	-10.2433	1.78466e-22	6.13644e-21	40.1907
CACNA1H	-33.2691	31.0741	-10.24	1.83572e-22	6.30229e-21	40.1628
KLHDC8B	-16.891	28.8473	-10.2338	1.93531e-22	6.63671e-21	40.1107
PRDM5	-1.34392	1.99703	-10.2328	1.95115e-22	6.6851e-21	40.1026
PHLDA3	-35.1399	52.6111	-10.2327	1.95344e-22	6.68701e-21	40.1015
ZNF436-AS1	-1.8224	3.58134	-10.2325	1.95751e-22	6.69504e-21	40.0994
CRY2	-8.09857	18.4536	-10.2271	2.04991e-22	6.99867e-21	40.0539
SRL	-1.05125	1.10344	-10.225	2.08544e-22	7.11368e-21	40.0369
PDGFRL	-14.4607	12.2194	-10.2244	2.09605e-22	7.14357e-21	40.0319
SRPX2	-15.2406	18.9459	-10.2221	2.13926e-22	7.28442e-21	40.0118
HOXA4	-5.44618	6.12152	-10.2202	2.17287e-22	7.39236e-21	39.9964
TCEAL5	-1.38805	1.22301	-10.2197	2.18261e-22	7.41894e-21	39.992
UTRN	-12.2784	23.8054	-10.2191	2.19391e-22	7.4508e-21	39.9869
NXN	-14.4583	22.0265	-10.2187	2.20045e-22	7.46646e-21	39.984
P2RX7	-2.67443	4.52086	-10.2111	2.34855e-22	7.96199e-21	39.9197
FAM160B1	-5.50735	16.7124	-10.2088	2.39568e-22	8.11465e-21	39.9001
FGFR1	-19.6887	22.7939	-10.2037	2.5011e-22	8.46432e-21	39.8576
COX4I2	-4.74098	8.42538	-10.2015	2.54863e-22	8.61764e-21	39.839
TSPAN2	-22.6883	24.0833	-10.1985	2.61488e-22	8.83391e-21	39.8137
FAM124A	-4.0618	4.24453	-10.1964	2.66139e-22	8.98319e-21	39.7963
NTM	-3.2752	4.05278	-10.1945	2.705e-22	9.12243e-21	39.7802
MATN2	-25.3559	33.4425	-10.1915	2.77474e-22	9.34946e-21	39.7551
ROBO4	-5.78402	9.49743	-10.1903	2.80499e-22	9.44315e-21	39.7444
FCGR2B	-3.19474	4.59777	-10.1808	3.03902e-22	1.02132e-20	39.6653
NOVA1	-1.82994	1.82938	-10.1791	3.08458e-22	1.03573e-20	39.6506
BBS9	-1.66556	4.89025	-10.1744	3.21095e-22	1.07723e-20	39.611
TNFSF8	-2.96729	4.07212	-10.1677	3.39837e-22	1.13912e-20	39.555
P4HA3	-3.64937	3.60736	-10.1675	3.40358e-22	1.13988e-20	39.5535
DPY19L2	-2.09362	2.14193	-10.166	3.44717e-22	1.15347e-20	39.541
TMEM255A	-2.45622	3.09205	-10.1623	3.55676e-22	1.18911e-20	39.5101
RAI14	-15.9625	26.5445	-10.1617	3.57654e-22	1.19469e-20	39.5046
JDP2	-5.67034	12.789	-10.153	3.85042e-22	1.28396e-20	39.4318
ARHGAP10	-4.77543	7.38864	-10.1527	3.85974e-22	1.28596e-20	39.4294
PTCH2	-7.09731	5.39977	-10.1503	3.93847e-22	1.31106e-20	39.4095
TEAD1	-14.352	23.744	-10.1496	3.96206e-22	1.31778e-20	39.4036
AZIN2	-1.22841	1.91023	-10.1466	4.06461e-22	1.35059e-20	39.3784
PAXIP1-AS2	-3.23338	8.76385	-10.1465	4.06771e-22	1.35059e-20	39.3776
GFRA1	-8.99298	9.55745	-10.1451	4.11719e-22	1.36585e-20	39.3657
ZBTB8A	-1.18234	3.18881	-10.1449	4.12591e-22	1.36757e-20	39.3636
TCEAL4	-29.3227	58.332	-10.1392	4.32854e-22	1.4335e-20	39.3163
TMEM130	-2.90097	2.53244	-10.1383	4.36183e-22	1.44329e-20	39.3087
RRAGB	-5.15815	13.1306	-10.1374	4.39524e-22	1.4531e-20	39.3012
CCL2	-67.5192	73.9938	-10.1351	4.48224e-22	1.48059e-20	39.2819
LRRC37A17P	-1.70498	3.16122	-10.1323	4.58951e-22	1.51473e-20	39.2585
CSF1	-17.7529	33.0136	-10.1201	5.0914e-22	1.67869e-20	39.1561
SIN3B	-7.0044	20.1871	-10.12	5.09495e-22	1.67869e-20	39.1554
LINC00578	-8.70488	7.48268	-10.1186	5.15362e-22	1.69657e-20	39.1441
FRMD6	-9.20696	12.1045	-10.1173	5.21419e-22	1.71505e-20	39.1326
ARHGAP24	-2.69339	6.40003	-10.1158	5.27752e-22	1.73293e-20	39.1207
TMEM109	-40.5849	117.362	-10.1142	5.34904e-22	1.75416e-20	39.1074
MS4A7	-16.6819	25.489	-10.1142	5.35125e-22	1.75416e-20	39.107
PCDHB12	-1.15975	1.71862	-10.106	5.73706e-22	1.87903e-20	39.0383
HERC1	-5.10181	13.7335	-10.1053	5.7679e-22	1.88594e-20	39.033
SDC3	-39.4622	56.7567	-10.1034	5.86582e-22	1.91472e-20	39.0164
ADPRH	-4.05304	8.15226	-10.0942	6.33823e-22	2.06369e-20	38.94
SEPTIN7	-17.605	46.415	-10.0826	6.99431e-22	2.27539e-20	38.8428
ZNF846	-1.91834	4.53814	-10.0768	7.34088e-22	2.38613e-20	38.7951
FGF14-AS2	-3.54789	3.93414	-10.0724	7.62264e-22	2.47563e-20	38.7579
EBF2	-3.28082	2.21099	-10.0602	8.44591e-22	2.7407e-20	38.6567
NLRP1	-5.54899	9.36162	-10.0601	8.45318e-22	2.74076e-20	38.6559
MACORIS	-1.69677	1.71019	-10.0483	9.34453e-22	3.02722e-20	38.5569
MACF1	-12.767	21.6379	-10.0468	9.45873e-22	3.05909e-20	38.545
FHL5	-11.5689	7.77562	-10.0457	9.54587e-22	3.08469e-20	38.5359
LMCD1	-5.84272	9.74188	-10.0442	9.66861e-22	3.12174e-20	38.5233
FUT11	-4.71818	11.2431	-10.0428	9.78128e-22	3.15548e-20	38.5119
CACNA2D3	-1.04136	1.58334	-10.0417	9.87536e-22	3.18318e-20	38.5024
DLG2	-1.05135	1.04267	-10.0373	1.02527e-21	3.30204e-20	38.4654
ROR1	-4.71899	8.22038	-10.035	1.04511e-21	3.36314e-20	38.4465
PRXL2C	-5.61089	14.1136	-10.0301	1.08875e-21	3.50068e-20	38.4062
POLK	-2.54266	7.17697	-10.0223	1.16351e-21	3.73484e-20	38.3406
HTRA3	-50.9888	67.735	-10.0166	1.21971e-21	3.91197e-20	38.2941
LINC01128	-2.0418	4.18309	-10.0142	1.24494e-21	3.98629e-20	38.2739
NUDT10	-1.73673	1.6945	-10.0136	1.25137e-21	4.00355e-20	38.2688
ELMO1	-5.27431	7.87922	-10.0112	1.27663e-21	4.081e-20	38.2491
ILK	-5.08355	6.69433	-10.0092	1.29883e-21	4.14852e-20	38.2321
AP4S1	-1.33841	3.23338	-10.0087	1.30362e-21	4.16038e-20	38.2285
BMPER	-2.56368	2.50445	-10.008	1.31207e-21	4.18389e-20	38.2221
HOXD8	-2.28118	4.00841	-10.0062	1.33155e-21	4.24251e-20	38.2075
AOX1	-9.682	7.73413	-10.0038	1.35889e-21	4.32607e-20	38.1875
TMEM91	-1.86723	3.65045	-10.0035	1.36272e-21	4.33468e-20	38.1847
DUSP3	-41.4708	74.9418	-10.0024	1.37474e-21	4.36934e-20	38.176
FHL1	-182.409	164.204	-9.99589	1.45255e-21	4.61283e-20	38.1217
PALLD	-99.062	106.109	-9.99352	1.48174e-21	4.70051e-20	38.1021
CDK17	-6.0719	16.3284	-9.99345	1.48259e-21	4.70051e-20	38.1015
CRMP1	-5.21239	6.65708	-9.98839	1.54706e-21	4.90069e-20	38.0595
MMP2	-271.407	271.429	-9.98829	1.54827e-21	4.90069e-20	38.0588
HCG11	-7.16375	14.5301	-9.98279	1.62158e-21	5.12855e-20	38.0131
LRCH3	-3.22667	9.37324	-9.97984	1.66225e-21	5.25287e-20	37.9887
TXLNB	-1.2851	1.62647	-9.97403	1.74536e-21	5.51099e-20	37.9406
PCBP3	-1.75603	1.92277	-9.97338	1.75496e-21	5.5368e-20	37.9352
GIHCG	-3.60804	5.38926	-9.97031	1.80071e-21	5.67651e-20	37.9098
FENDRR	-15.079	17.5359	-9.96558	1.8737e-21	5.89698e-20	37.8706
RASSF8	-9.78953	10.867	-9.9626	1.92106e-21	6.03619e-20	37.8459
CZIB	-7.44371	20.8942	-9.95967	1.96895e-21	6.18164e-20	37.8216
TINF2	-10.9544	42.7111	-9.95258	2.08949e-21	6.55475e-20	37.763
FBXL5	-19.8462	58.4635	-9.95218	2.09656e-21	6.57159e-20	37.7597
PXDN	-17.9317	28.7407	-9.94699	2.18982e-21	6.85837e-20	37.7168
PAMR1	-7.37239	8.66406	-9.94341	2.25647e-21	7.0614e-20	37.6872
ZNF677	-1.47934	2.21934	-9.93568	2.40742e-21	7.52767e-20	37.6233
A4GALT	-12.3134	22.466	-9.93063	2.51142e-21	7.84652e-20	37.5816
ZMIZ1	-16.403	42.5658	-9.92868	2.55267e-21	7.96893e-20	37.5655
RBMS2	-8.10558	20.0945	-9.91938	2.75925e-21	8.60691e-20	37.4888
EIF4E3	-4.16294	8.56486	-9.91768	2.79896e-21	8.72373e-20	37.4747
DTWD1	-1.74555	4.38879	-9.91559	2.84835e-21	8.8705e-20	37.4574
RBPMS	-26.9327	36.3579	-9.91451	2.87397e-21	8.94309e-20	37.4486
ZNF287	-1.28269	3.00466	-9.91087	2.96304e-21	9.20543e-20	37.4185
GFPT2	-11.5173	11.0478	-9.91053	2.97133e-21	9.22376e-20	37.4157
TAGLN	-892.14	782.266	-9.90996	2.98553e-21	9.26043e-20	37.411
SEC22B4P	-2.0623	3.98711	-9.90629	3.07865e-21	9.54158e-20	37.3807
CHST1	-4.00054	5.90393	-9.90528	3.10462e-21	9.61436e-20	37.3724
ATP10A	-3.34382	5.53009	-9.90205	3.18955e-21	9.86947e-20	37.3458
FNDC1	-36.6958	29.3034	-9.90069	3.22599e-21	9.97426e-20	37.3346
CIRBP	-28.3558	83.4047	-9.89732	3.31827e-21	1.02514e-19	37.3068
TRAM1L1	-1.18261	2.00395	-9.89681	3.33241e-21	1.02868e-19	37.3026
MCTP1	-2.43261	4.04528	-9.89208	3.46669e-21	1.06928e-19	37.2636
MRTFB	-4.45815	10.732	-9.88774	3.59468e-21	1.10787e-19	37.2279
RFLNB	-9.17072	18.2705	-9.88757	3.59963e-21	1.10851e-19	37.2265
PLA2G4C	-4.10454	5.30028	-9.8791	3.86326e-21	1.18686e-19	37.1568
PPIAP39	-2.13603	2.42	-9.87868	3.87689e-21	1.1901e-19	37.1533
DIPK1A	-8.28725	18.4451	-9.87429	4.02173e-21	1.23358e-19	37.1171
STUM	-4.26699	3.82902	-9.87174	4.1079e-21	1.25902e-19	37.0962
CRTC1	-3.64358	9.42162	-9.8695	4.18546e-21	1.28177e-19	37.0778
RCAN2	-28.388	31.6998	-9.86818	4.23193e-21	1.29498e-19	37.0669
APOD	-189.061	158.529	-9.86729	4.2635e-21	1.3036e-19	37.0595
SASH1	-8.64828	15.8977	-9.86379	4.38961e-21	1.3411e-19	37.0308
ZKSCAN7	-1.137	2.14964	-9.86261	4.43283e-21	1.35324e-19	37.0211
CD1D	-3.40795	5.89651	-9.86175	4.46501e-21	1.36199e-19	37.014
PPP1R14A	-59.0008	62.2715	-9.86014	4.52527e-21	1.37928e-19	37.0008
CGNL1	-6.26543	8.87905	-9.8587	4.57995e-21	1.39485e-19	36.9889
PTN	-27.8452	33.4604	-9.85582	4.69111e-21	1.42757e-19	36.9653
NBEA	-3.75919	4.35757	-9.85338	4.78732e-21	1.45571e-19	36.9453
KDR	-9.09505	17.9066	-9.85267	4.81565e-21	1.46317e-19	36.9394
COL16A1	-23.9589	28.8192	-9.85027	4.91285e-21	1.49036e-19	36.9197
ANTXR2	-26.6989	35.8442	-9.84957	4.94182e-21	1.49797e-19	36.9139
GRIK5	-5.13598	4.63765	-9.84786	5.01241e-21	1.51713e-19	36.8999
NEK9	-8.87274	22.7592	-9.84785	5.01288e-21	1.51713e-19	36.8998
SLCO2B1	-15.1542	28.3289	-9.84492	5.13669e-21	1.55339e-19	36.8758
ABCA10	-2.72435	2.70466	-9.84294	5.2221e-21	1.57798e-19	36.8595
EIF3EP1	-1.15632	2.17379	-9.84095	5.30962e-21	1.60317e-19	36.8431
FAM168A	-8.78241	24.0785	-9.83302	5.67173e-21	1.70984e-19	36.7781
NGF	-3.02514	2.82793	-9.83092	5.77128e-21	1.73849e-19	36.7609
SSH1	-5.29373	13.3378	-9.82819	5.90402e-21	1.77709e-19	36.7385
EID3	-1.7242	3.4034	-9.82725	5.95038e-21	1.78965e-19	36.7307
ZYG11B	-5.59499	15.1774	-9.8171	6.47444e-21	1.94576e-19	36.6475
RHOB	-447.036	648.433	-9.8098	6.87882e-21	2.06407e-19	36.5877
ULK2	-3.11958	6.11288	-9.80752	7.01051e-21	2.10196e-19	36.569
PRDM2	-4.26074	13.5153	-9.80544	7.13287e-21	2.13699e-19	36.552
ISL1	-6.57334	8.98689	-9.79632	7.69392e-21	2.30329e-19	36.4773
GNPDA2	-2.54959	6.65827	-9.79534	7.75634e-21	2.31999e-19	36.4693
WASF2	-26.6684	88.6192	-9.79526	7.7617e-21	2.31999e-19	36.4687
SOX18	-43.3149	55.7702	-9.7944	7.81735e-21	2.33481e-19	36.4616
CHRDL2	-63.0747	45.8281	-9.78693	8.31656e-21	2.48008e-19	36.4006
IGF1	-3.44483	2.52863	-9.7767	9.05317e-21	2.69558e-19	36.3169
MXD4	-12.2023	37.2782	-9.77511	9.17321e-21	2.72922e-19	36.3039
COL1A2	-474.118	523.62	-9.77446	9.22295e-21	2.74191e-19	36.2985
EPM2A	-4.00753	5.1547	-9.77266	9.36115e-21	2.78086e-19	36.2839
COL3A1	-1209.83	1169.08	-9.77201	9.41167e-21	2.79372e-19	36.2786
MAMDC2	-10.4455	12.0675	-9.77115	9.47887e-21	2.81151e-19	36.2716
LRRN2	-3.76657	3.89663	-9.76673	9.83256e-21	2.91418e-19	36.2354
TPST1	-9.85817	17.8404	-9.76544	9.93809e-21	2.94095e-19	36.2249
NIBAN1	-54.0766	51.5674	-9.76166	1.02538e-20	3.03206e-19	36.1941
RNF11	-26.6078	81.1367	-9.7615	1.02679e-20	3.0339e-19	36.1927
RASA3	-11.0534	24.5326	-9.75739	1.06231e-20	3.13646e-19	36.1592
P2RY12	-1.94655	2.22105	-9.75514	1.08223e-20	3.19039e-19	36.1408
ANKRD50	-5.66065	13.1423	-9.75188	1.11189e-20	3.27532e-19	36.1142
PCDHB7	-1.66858	1.99876	-9.75175	1.11308e-20	3.27633e-19	36.1131
ARNT	-7.27513	24.168	-9.75059	1.12379e-20	3.30534e-19	36.1037
HDAC7	-8.76991	25.5923	-9.74899	1.13875e-20	3.34679e-19	36.0906
CCDC8	-8.24138	8.0581	-9.74018	1.22486e-20	3.59714e-19	36.0188
ZNF70	-1.60334	3.90539	-9.73422	1.28672e-20	3.77593e-19	35.9702
GNB5	-1.86126	4.31405	-9.72911	1.34213e-20	3.93554e-19	35.9286
TLR7	-2.85472	3.98716	-9.72548	1.38295e-20	4.05218e-19	35.8991
LINC02106	-1.34558	1.36738	-9.72491	1.38959e-20	4.06854e-19	35.8943
F2RL2	-11.9954	15.6507	-9.72372	1.4033e-20	4.10558e-19	35.8847
RASSF2	-18.9488	26.4248	-9.72308	1.41066e-20	4.12399e-19	35.8795
ZBTB20	-2.52008	3.80717	-9.72234	1.41928e-20	4.14605e-19	35.8735
MR1	-3.75605	9.84382	-9.71597	1.49603e-20	4.36366e-19	35.8216
PLBD2	-16.3576	46.4718	-9.71213	1.54412e-20	4.50053e-19	35.7904
SLC8A1	-3.14754	3.82216	-9.71027	1.56795e-20	4.56655e-19	35.7753
SEMA4C	-13.6063	25.6614	-9.70875	1.58773e-20	4.62069e-19	35.7629
ZNF569	-1.33685	2.38859	-9.70191	1.67999e-20	4.88181e-19	35.7072
ACTN1	-98.5466	126.725	-9.69913	1.71888e-20	4.99107e-19	35.6846
ZNF542P	-2.57612	3.84526	-9.69781	1.73767e-20	5.04184e-19	35.6739
MAPRE2	-12.8728	35.1572	-9.69514	1.77635e-20	5.14811e-19	35.6522
ATP2B4	-74.3071	81.1152	-9.6951	1.77696e-20	5.14811e-19	35.6519
WDR86	-2.71735	3.25524	-9.69105	1.83722e-20	5.31473e-19	35.619
TNFAIP8L3	-6.37913	7.14274	-9.68463	1.93711e-20	5.5995e-19	35.5668
PAM	-24.4705	47.8749	-9.67829	2.04081e-20	5.89486e-19	35.5154
FZD8	-11.881	19.519	-9.66468	2.28272e-20	6.58377e-19	35.4049
CBLN3	-1.96689	3.6889	-9.66409	2.29377e-20	6.61071e-19	35.4001
SEPTIN11	-16.6278	38.5243	-9.65418	2.48846e-20	7.16647e-19	35.3198
LMOD1	-188.712	163.269	-9.64532	2.67636e-20	7.69612e-19	35.2481
LGALS1	-464.152	727.177	-9.64492	2.68513e-20	7.71561e-19	35.2448
FMO1	-4.57993	3.83506	-9.64291	2.72988e-20	7.83835e-19	35.2285
ZC3H6	-1.6083	4.01879	-9.6427	2.73451e-20	7.84583e-19	35.2269
LINC01081	-2.27525	3.66562	-9.63467	2.92093e-20	8.35589e-19	35.1618
SCMH1	-11.7565	27.4938	-9.62634	3.12752e-20	8.94026e-19	35.0945
CACNB2	-3.32276	3.74301	-9.62574	3.14296e-20	8.97777e-19	35.0896
RADIL	-1.01508	1.10518	-9.61714	3.3728e-20	9.62717e-19	35.02
ROM1	-2.31653	4.12797	-9.61641	3.39293e-20	9.67748e-19	35.0142
TSHZ1	-8.20692	15.2549	-9.6135	3.47474e-20	9.90353e-19	34.9907
MS4A2	-3.41972	4.41761	-9.61198	3.51829e-20	1.00203e-18	34.9784
FBXO32	-43.1943	44.3404	-9.61026	3.56825e-20	1.01551e-18	34.9645
C4orf3	-32.3206	87.5119	-9.60603	3.69418e-20	1.0498e-18	34.9303
LRP12	-1.74613	3.37577	-9.6047	3.73459e-20	1.06018e-18	34.9196
GPR68	-6.33685	11.8477	-9.60465	3.7362e-20	1.06018e-18	34.9191
KLHL4	-1.62344	1.49359	-9.60289	3.79026e-20	1.07473e-18	34.905
ITGB3	-3.32274	4.16155	-9.60235	3.80731e-20	1.07877e-18	34.9006
PRKACB	-10.6548	25.6331	-9.60018	3.87541e-20	1.09727e-18	34.8831
SORBS1	-94.7221	85.1946	-9.59233	4.13258e-20	1.16922e-18	34.8197
FOXP2	-3.40189	3.14678	-9.59134	4.16628e-20	1.1779e-18	34.8117
ANGPTL7	-5.5467	4.69588	-9.59087	4.18218e-20	1.18066e-18	34.808
KLF10	-41.7007	76.3288	-9.59021	4.20491e-20	1.18621e-18	34.8026
EPB41L3	-5.82143	7.7889	-9.58808	4.27873e-20	1.20616e-18	34.7855
LINC00968	-1.37391	0.826971	-9.58711	4.31298e-20	1.21493e-18	34.7776
SNORD116-24	-3.67938	3.77648	-9.58005	4.56926e-20	1.28431e-18	34.7207
PID1	-13.3035	17.8694	-9.57085	4.92626e-20	1.38264e-18	34.6466
DEPP1	-68.7365	84.5256	-9.56839	5.02606e-20	1.40963e-18	34.6268
ADH1B	-74.03	52.03	-9.56542	5.14955e-20	1.44322e-18	34.6029
METTL24	-7.96512	6.96628	-9.56248	5.2749e-20	1.47728e-18	34.5791
BBOF1	-1.40347	3.04258	-9.55995	5.38488e-20	1.50699e-18	34.5588
FCER1A	-8.93014	9.07247	-9.55876	5.4373e-20	1.52056e-18	34.5493
BTBD19	-3.90467	6.24809	-9.55651	5.5383e-20	1.54768e-18	34.5311
PI16	-34.6306	33.0162	-9.55508	5.60346e-20	1.56476e-18	34.5196
FGF10	-8.50826	7.48563	-9.55106	5.79021e-20	1.61574e-18	34.4873
KCNMA1	-18.2254	15.122	-9.55016	5.83281e-20	1.62645e-18	34.48
CA5B	-1.68769	3.2505	-9.54441	6.11281e-20	1.7033e-18	34.4338
AOC4P	-1.03133	0.935445	-9.53994	6.33983e-20	1.76529e-18	34.3979
LINC02202	-1.37226	1.24232	-9.53552	6.57229e-20	1.8287e-18	34.3624
ZNF154	-2.3425	3.37891	-9.53035	6.85542e-20	1.9061e-18	34.3208
LSP1	-21.2839	39.4465	-9.52957	6.8991e-20	1.91687e-18	34.3145
CACNA1C	-7.25789	6.94392	-9.52827	6.97256e-20	1.93589e-18	34.3041
PDLIM7	-89.115	107.676	-9.52707	7.04122e-20	1.95355e-18	34.2944
CDC42EP3	-13.2939	15.6095	-9.52633	7.08341e-20	1.96384e-18	34.2886
STARD13	-7.92387	13.7393	-9.52215	7.32895e-20	2.029e-18	34.255
SIK3	-4.63977	13.5091	-9.51997	7.46021e-20	2.06387e-18	34.2375
TTLL11	-3.76825	6.03015	-9.51719	7.63103e-20	2.10961e-18	34.2151
FBLN7	-1.0591	1.54266	-9.51708	7.63742e-20	2.10987e-18	34.2143
B3GNT9	-8.07835	18.543	-9.51549	7.73717e-20	2.1359e-18	34.2015
HOXB-AS1	-1.96142	3.058	-9.51271	7.9144e-20	2.18327e-18	34.1792
ABCD2	-1.01867	1.46294	-9.51003	8.08884e-20	2.2298e-18	34.1577
PREX1	-12.139	26.8216	-9.50889	8.16412e-20	2.24894e-18	34.1486
ADAMTS5	-3.4694	4.83704	-9.50735	8.26705e-20	2.27568e-18	34.1362
DMD	-8.82987	9.18483	-9.5016	8.66299e-20	2.38227e-18	34.0901
NOX4	-1.57961	1.77873	-9.50155	8.66663e-20	2.38227e-18	34.0897
LINC01798	-1.10125	1.10622	-9.49565	9.09246e-20	2.49755e-18	34.0424
ST3GAL5	-3.15908	7.0157	-9.49478	9.15636e-20	2.51332e-18	34.0355
CCDC3	-28.3775	29.6336	-9.49243	9.33311e-20	2.55639e-18	34.0167
TMEM170B	-1.7369	3.18587	-9.48956	9.55366e-20	2.61494e-18	33.9937
H6PD	-16.2694	40.6621	-9.48607	9.82801e-20	2.68623e-18	33.9658
PNMA1	-39.756	70.6691	-9.48446	9.95728e-20	2.71964e-18	33.9529
FLNA	-932.821	873.468	-9.48275	1.00971e-19	2.75589e-18	33.9391
DPEP2	-2.46642	4.04099	-9.4794	1.03756e-19	2.82989e-18	33.9123
CD99	-64.5209	153.458	-9.47908	1.04021e-19	2.83513e-18	33.9098
TERF2IP	-15.2156	51.8414	-9.47579	1.06836e-19	2.90979e-18	33.8835
GAL3ST4	-5.80751	9.74984	-9.47508	1.07455e-19	2.9246e-18	33.8778
C3	-262.817	281.473	-9.47151	1.10617e-19	3.00855e-18	33.8492
AKAP12	-32.1445	36.4246	-9.4655	1.16139e-19	3.1565e-18	33.8012
MAP9	-2.42619	4.41313	-9.46484	1.16768e-19	3.17137e-18	33.7959
PKMP3	-2.40272	2.80685	-9.46323	1.18297e-19	3.21064e-18	33.7831
ARHGEF9	-3.75768	9.7742	-9.4627	1.18803e-19	3.22211e-18	33.7788
RSU1	-19.0955	57.7657	-9.46249	1.19006e-19	3.22536e-18	33.7772
ACTA2-AS1	-7.4687	7.19749	-9.46156	1.19907e-19	3.2475e-18	33.7697
DTX3	-10.3266	16.6346	-9.45923	1.22201e-19	3.30729e-18	33.7511
ZNF300P1	-2.57557	3.32736	-9.45416	1.27329e-19	3.44127e-18	33.7105
NCAM2	-1.21937	1.25934	-9.45358	1.27922e-19	3.45487e-18	33.706
ANKRD40	-9.96153	29.0128	-9.4532	1.28323e-19	3.46329e-18	33.7029
DIPK2A	-5.27323	14.8437	-9.44787	1.33983e-19	3.61352e-18	33.6603
ITSN1	-2.56894	6.29748	-9.44678	1.35169e-19	3.64296e-18	33.6517
DAPK3	-24.0732	54.176	-9.44373	1.38546e-19	3.72878e-18	33.6273
CTIF	-7.7021	17.6402	-9.44354	1.38764e-19	3.73204e-18	33.6258
LAIR1	-6.24306	11.2954	-9.43953	1.43342e-19	3.85248e-18	33.5938
RFTN1	-19.6526	30.1684	-9.43852	1.44523e-19	3.88152e-18	33.5857
PRND	-1.90962	1.69337	-9.43731	1.45936e-19	3.91206e-18	33.5761
PLEKHG1	-7.11231	14.6125	-9.43729	1.45963e-19	3.91206e-18	33.5759
GIMAP5	-1.06986	1.62306	-9.43251	1.51721e-19	4.06356e-18	33.5378
COL18A1	-47.1985	81.4512	-9.43172	1.52699e-19	4.08691e-18	33.5315
CREB3L2	-12.801	33.7469	-9.42994	1.54915e-19	4.14337e-18	33.5173
L3MBTL3	-2.38934	5.88269	-9.425	1.6122e-19	4.30902e-18	33.478
DOCK4	-2.79756	5.64237	-9.4199	1.6802e-19	4.48766e-18	33.4372
ARHGAP29	-3.47842	7.53837	-9.41956	1.68477e-19	4.49675e-18	33.4346
RAB25	64.0269	141.772	9.41821	1.70331e-19	4.54309e-18	33.4238
SPON2	-30.1591	49.1796	-9.41115	1.80328e-19	4.80335e-18	33.3676
NEK1	-2.07213	5.90978	-9.41114	1.80337e-19	4.80335e-18	33.3675
KAT2B	-6.34335	18.5914	-9.40813	1.8478e-19	4.91831e-18	33.3435
CTSF	-27.9395	46.0406	-9.40804	1.84916e-19	4.91853e-18	33.3428
FGL2	-62.9019	89.6036	-9.40765	1.85496e-19	4.93058e-18	33.3397
RMDN2	-1.7261	2.97276	-9.40606	1.87891e-19	4.9908e-18	33.3271
ANGPTL1	-25.914	22.6259	-9.40176	1.94532e-19	5.16365e-18	33.2929
SARM1	-1.02228	2.63748	-9.40093	1.95836e-19	5.19471e-18	33.2863
IL33	-33.2175	45.8063	-9.40067	1.96254e-19	5.20222e-18	33.2842
ZHX3	-5.30412	10.8069	-9.39993	1.97424e-19	5.22964e-18	33.2783
ZYX	-93.7475	206.545	-9.39976	1.97705e-19	5.23351e-18	33.2769
ATOH8	-2.98681	3.96933	-9.39636	2.03208e-19	5.37548e-18	33.2499
LY86	-11.4461	16.0571	-9.3897	2.14415e-19	5.66032e-18	33.197
FAM114A2	-2.17682	8.4347	-9.38888	2.1584e-19	5.69404e-18	33.1904
SNX21	-6.74204	13.8979	-9.38742	2.1839e-19	5.75739e-18	33.1789
CDH23	-1.09942	1.17008	-9.38686	2.19382e-19	5.77959e-18	33.1744
DEGS1	-27.1324	79.5245	-9.38648	2.20068e-19	5.79373e-18	33.1713
TBC1D9	-8.23683	21.0382	-9.38392	2.24646e-19	5.90621e-18	33.151
TMEM121	-3.08429	4.75509	-9.37857	2.3456e-19	6.16267e-18	33.1085
ZDHHC17	-4.21114	11.0055	-9.37728	2.37005e-19	6.22267e-18	33.0983
PYGM	-5.94117	5.64647	-9.37706	2.37422e-19	6.2294e-18	33.0965
TSC22D3	-45.4262	77.7799	-9.37017	2.50976e-19	6.58055e-18	33.0418
SVIL	-76.2356	74.8387	-9.36905	2.5324e-19	6.63542e-18	33.033
KLHL5	-19.7165	28.6568	-9.36844	2.54498e-19	6.66384e-18	33.0281
NXPH3	-5.27566	5.34019	-9.36702	2.57427e-19	6.73598e-18	33.0168
AGO3	-1.62428	4.59511	-9.36665	2.58203e-19	6.75171e-18	33.0138
PDE8B	-1.35212	2.0375	-9.34887	2.97918e-19	7.77443e-18	32.8729
CKS2	81.2324	148.321	9.34768	3.00774e-19	7.84366e-18	32.8635
MAP3K7CL	-1.95555	3.72005	-9.34527	3.06668e-19	7.99199e-18	32.8443
VCL	-56.0339	88.1305	-9.34502	3.07287e-19	8.00272e-18	32.8424
LPP	-48.0978	53.3562	-9.34402	3.09769e-19	8.06193e-18	32.8344
ITGAV	-25.6595	64.7051	-9.34201	3.14818e-19	8.18782e-18	32.8185
EPCAM	237.298	444.758	9.33844	3.23965e-19	8.42004e-18	32.7903
SCN7A	-8.4008	7.518	-9.33731	3.26934e-19	8.49151e-18	32.7813
FNBP1	-29.6333	40.8823	-9.33714	3.27378e-19	8.49733e-18	32.7799
INKA1	-3.28201	5.87159	-9.33418	3.35259e-19	8.69605e-18	32.7565
FAP	-7.27831	7.73986	-9.33325	3.37758e-19	8.75498e-18	32.7492
VAMP5	-47.505	93.8882	-9.31948	3.77246e-19	9.77198e-18	32.6402
MYO5A	-4.2334	8.49244	-9.31863	3.79829e-19	9.82307e-18	32.6335
LY96	-20.1629	36.519	-9.31858	3.7998e-19	9.82307e-18	32.6331
TRAM2	-12.4763	29.4655	-9.31553	3.89422e-19	1.00604e-17	32.609
FTX	-3.579	8.60215	-9.31511	3.90711e-19	1.0087e-17	32.6057
P2RY14	-7.26498	9.23311	-9.31293	3.97608e-19	1.02582e-17	32.5885
RBSN	-5.01031	13.2115	-9.31148	4.02271e-19	1.03716e-17	32.577
NTN1	-22.8344	23.33	-9.30878	4.11082e-19	1.0582e-17	32.5556
OSTM1	-10.5166	23.7108	-9.30873	4.11254e-19	1.0582e-17	32.5552
FOXJ2	-4.95939	16.3243	-9.30352	4.28765e-19	1.10252e-17	32.5141
FER	-2.483	4.92943	-9.30101	4.3748e-19	1.12418e-17	32.4943
NCOA1	-7.53264	24.1936	-9.29934	4.43388e-19	1.13861e-17	32.4811
FCGR2C	-6.2603	8.68831	-9.29756	4.49749e-19	1.15418e-17	32.467
BARX1	-180.737	170.696	-9.29673	4.5275e-19	1.16111e-17	32.4605
SCARF1	-4.63532	9.85105	-9.29661	4.53205e-19	1.1615e-17	32.4595
DSTYK	-2.94416	8.57674	-9.29629	4.5435e-19	1.16367e-17	32.457
ZMAT3	-5.42596	12.9416	-9.29461	4.60521e-19	1.17869e-17	32.4437
GNAI1	-8.34704	17.4253	-9.29206	4.70013e-19	1.20219e-17	32.4236
MILR1	-4.92785	8.3715	-9.29102	4.7397e-19	1.21151e-17	32.4154
UBE2T	20.6825	39.4332	9.29093	4.74292e-19	1.21153e-17	32.4147
SHISA4	-8.08087	14.94	-9.28807	4.85274e-19	1.23876e-17	32.3921
SULF1	-59.6662	71.0467	-9.28718	4.88735e-19	1.24677e-17	32.3851
MOSMO	-1.77406	6.82497	-9.28552	4.95278e-19	1.26263e-17	32.372
P3H1	-6.62434	15.1664	-9.28538	4.95847e-19	1.26325e-17	32.3709
ZNF501	-1.22671	2.963	-9.27478	5.39752e-19	1.3742e-17	32.2873
COL4A1	-134.053	225.068	-9.27457	5.40631e-19	1.37553e-17	32.2857
HSPA2	-9.98054	12.6855	-9.27195	5.52113e-19	1.40382e-17	32.265
MAGED2	-38.1333	109.908	-9.26506	5.83373e-19	1.48135e-17	32.2108
MYL9	-1247.43	1152.73	-9.26311	5.92554e-19	1.50368e-17	32.1954
CSRP2	-7.97103	10.6911	-9.2609	6.03091e-19	1.52941e-17	32.178
ZBTB16	-4.56403	4.14487	-9.25105	6.52441e-19	1.65131e-17	32.1005
MYLIP	-13.7542	36.041	-9.24929	6.61691e-19	1.67363e-17	32.0867
COL4A2-AS1	-1.05293	1.1259	-9.24817	6.67651e-19	1.6876e-17	32.0778
MECP2	-4.13923	11.3457	-9.23926	7.16855e-19	1.81078e-17	32.0078
VPS39	-6.51852	25.989	-9.23605	7.35458e-19	1.85656e-17	31.9825
CITED2	-26.0401	58.9075	-9.2357	7.37506e-19	1.86052e-17	31.9798
CCN1	-261.387	271.171	-9.2349	7.42192e-19	1.87112e-17	31.9736
ARHGAP1	-21.7705	68.5647	-9.23278	7.54839e-19	1.90176e-17	31.9569
ITPKB	-27.3201	34.7413	-9.2285	7.81069e-19	1.96656e-17	31.9233
AHNAK	-101.699	196.548	-9.22602	7.96651e-19	2.00449e-17	31.9038
MRTFA	-6.51957	21.6498	-9.22234	8.20398e-19	2.06108e-17	31.8749
FILIP1	-9.14262	8.29628	-9.22226	8.20873e-19	2.06108e-17	31.8743
KCNB1	-2.17969	1.81943	-9.22226	8.20883e-19	2.06108e-17	31.8743
CLIC4P1	-1.15816	1.43073	-9.2222	8.21276e-19	2.06108e-17	31.8738
LAPTM4A	-115.345	427.809	-9.22208	8.22072e-19	2.06174e-17	31.8729
FREM1	-2.78371	2.97707	-9.22146	8.26151e-19	2.07063e-17	31.868
HSPA12A	-4.04487	6.18699	-9.21334	8.81381e-19	2.20762e-17	31.8042
ZNF358	-25.965	59.2039	-9.21251	8.87223e-19	2.22081e-17	31.7977
CHURC1	-9.55436	25.9703	-9.21004	9.04814e-19	2.26338e-17	31.7784
NEXN	-43.3672	41.4347	-9.20976	9.0681e-19	2.26691e-17	31.7762
TCEAL1	-16.873	34.2632	-9.20596	9.34647e-19	2.33499e-17	31.7464
SYPL2	-2.02128	2.34528	-9.20495	9.42194e-19	2.35232e-17	31.7385
TMEM59L	-2.4771	2.42606	-9.2047	9.4412e-19	2.35561e-17	31.7365
DOCK10	-3.90246	6.74943	-9.2046	9.44872e-19	2.35596e-17	31.7357
ACACB	-10.4935	12.8368	-9.20325	9.55097e-19	2.37992e-17	31.7251
SATB1	-4.77203	9.52936	-9.20165	9.67257e-19	2.40867e-17	31.7127
ASAP3	-5.71649	14.4092	-9.20129	9.70086e-19	2.41416e-17	31.7098
CKMT2-AS1	-1.38485	3.49301	-9.18939	1.06639e-18	2.65041e-17	31.6165
THBS2	-67.4922	74.1604	-9.18875	1.07181e-18	2.66217e-17	31.6116
EBP	17.1648	39.4476	9.18488	1.10523e-18	2.74164e-17	31.5813
SHISA3	-11.1243	9.44879	-9.18415	1.11168e-18	2.75589e-17	31.5756
ASB2	-21.3919	19.8643	-9.1835	1.11743e-18	2.76836e-17	31.5705
JPH2	-30.3976	25.9467	-9.18311	1.12091e-18	2.77521e-17	31.5674
PPP1R12C	-30.7661	50.6338	-9.1823	1.12817e-18	2.79138e-17	31.5611
CREBBP	-8.28685	25.7236	-9.18059	1.14361e-18	2.82779e-17	31.5477
PGBD1	-2.7298	4.80517	-9.17851	1.16262e-18	2.87295e-17	31.5314
GALNT15	-4.9092	4.65126	-9.17708	1.17594e-18	2.90402e-17	31.5202
HSPB6	-374.313	229.658	-9.17576	1.18827e-18	2.93258e-17	31.51
GREM2	-10.4652	12.1639	-9.17555	1.19033e-18	2.9358e-17	31.5082
MYH9	-121.609	375.028	-9.17307	1.21392e-18	2.99206e-17	31.4889
PPP2R5B	-7.21667	20.5939	-9.1719	1.22533e-18	3.01826e-17	31.4797
PROS1	-19.4318	30.0017	-9.17089	1.23516e-18	3.04036e-17	31.4718
SORCS1	-1.51193	1.41676	-9.17082	1.23587e-18	3.04036e-17	31.4713
UNC5C	-1.22501	2.36389	-9.16506	1.29364e-18	3.18044e-17	31.4263
RPL7AP28	-1.45854	1.45532	-9.1619	1.32651e-18	3.25918e-17	31.4016
TSPYL2	-14.3822	21.1204	-9.15968	1.35005e-18	3.3149e-17	31.3842
CHD3	-19.02	49.7747	-9.15634	1.38634e-18	3.40186e-17	31.3581
CSPG4	-25.2482	27.8982	-9.15573	1.39303e-18	3.4161e-17	31.3534
GALNT11	-3.73816	12.9839	-9.15219	1.43271e-18	3.50895e-17	31.3257
TMEM100	-11.0733	12.0105	-9.15185	1.43654e-18	3.51612e-17	31.3231
PLN	-99.332	88.0709	-9.14875	1.47221e-18	3.60113e-17	31.2989
OAZ2	-8.84127	27.0097	-9.14549	1.51079e-18	3.69318e-17	31.2734
KSR1	-3.10468	6.94229	-9.14519	1.51438e-18	3.69959e-17	31.2711
MARCHF8	-5.05026	15.4674	-9.14393	1.52953e-18	3.73427e-17	31.2613
LAMC1	-66.9295	112.21	-9.13894	1.59119e-18	3.88235e-17	31.2224
AVPR1A	-4.55387	4.53039	-9.13702	1.61556e-18	3.93931e-17	31.2074
MYO9B	-13.3989	39.402	-9.13551	1.63506e-18	3.98185e-17	31.1956
USP11	-12.2613	33.2615	-9.13519	1.63918e-18	3.98776e-17	31.1931
ANO6	-15.8204	36.8608	-9.13516	1.63956e-18	3.98776e-17	31.1929
HTR7P1	-1.14253	1.93937	-9.1304	1.70258e-18	4.13844e-17	31.1557
TCTN1	-2.04769	5.3094	-9.12836	1.73024e-18	4.20304e-17	31.1399
CNTNAP3P2	-1.20514	1.45696	-9.12562	1.7682e-18	4.28986e-17	31.1185
MEIS1-AS3	-1.43939	1.24437	-9.12512	1.77515e-18	4.30403e-17	31.1146
KCNMB1	-25.1658	23.3694	-9.12209	1.81814e-18	4.4055e-17	31.0911
RAPGEF1	-16.24	52.2229	-9.11868	1.86796e-18	4.52337e-17	31.0644
NFIB	-10.6602	22.6051	-9.11638	1.90223e-18	4.60346e-17	31.0465
NCS1	-31.6036	33.8538	-9.11359	1.94455e-18	4.70294e-17	31.0249
DCAF5	-5.65643	22.4871	-9.11196	1.96984e-18	4.76054e-17	31.0121
NFASC	-9.91409	8.60295	-9.11189	1.97083e-18	4.76054e-17	31.0116
CREM	-6.46762	12.7885	-9.11155	1.9762e-18	4.77054e-17	31.009
SLC16A2	-12.0002	18.0068	-9.11075	1.98875e-18	4.79782e-17	31.0027
CRIP2	-22.9315	48.6991	-9.10144	2.14042e-18	5.1605e-17	30.9303
RAB9B	-4.9968	4.83267	-9.10076	2.15205e-18	5.18531e-17	30.925
C1QTNF1	-20.5054	28.6803	-9.09776	2.20353e-18	5.30605e-17	30.9017
GPX7	-9.91418	15.9318	-9.09395	2.2709e-18	5.46487e-17	30.8721
DMPK	-40.8474	44.7151	-9.08915	2.35852e-18	5.67219e-17	30.8348
TMEM255B	-1.97716	3.80223	-9.08748	2.38977e-18	5.74376e-17	30.8218
SORBS3	-14.6339	32.9791	-9.08698	2.39916e-18	5.76275e-17	30.818
OSBPL5	-6.12268	13.2685	-9.08528	2.43162e-18	5.83711e-17	30.8047
CLDN5	-25.4714	31.1399	-9.0838	2.46026e-18	5.90218e-17	30.7932
CCM2L	-4.43022	5.57357	-9.07701	2.59538e-18	6.22247e-17	30.7405
INPP5B	-2.52984	7.07986	-9.07545	2.62762e-18	6.29587e-17	30.7284
C2CD2	-4.81873	13.0867	-9.07043	2.73348e-18	6.54545e-17	30.6895
GPNMB	-62.5459	90.9568	-9.06758	2.79556e-18	6.68996e-17	30.6674
SHC2	-7.55315	14.6856	-9.06647	2.8202e-18	6.74475e-17	30.6587
COX5A	56.9662	191.794	9.06625	2.82496e-18	6.75194e-17	30.6571
NUDT11	-1.96574	2.06327	-9.0641	2.87321e-18	6.86303e-17	30.6404
STK10	-6.37105	16.8309	-9.06116	2.9406e-18	7.01965e-17	30.6176
IL17D	-1.9721	3.11125	-9.06037	2.95898e-18	7.05918e-17	30.6114
RBPMS2	-39.5412	37.8113	-9.05625	3.05639e-18	7.27809e-17	30.5795
LCA5	-1.65357	3.56286	-9.04845	3.24981e-18	7.73391e-17	30.5191
RGS4	-8.93623	8.50915	-9.04772	3.26846e-18	7.7735e-17	30.5135
VENTX	-1.31647	1.71109	-9.04688	3.29014e-18	7.82025e-17	30.507
MYOT	-1.50557	1.86017	-9.04512	3.33595e-18	7.92428e-17	30.4934
SCRG1	-10.363	7.69171	-9.04311	3.38918e-18	8.04576e-17	30.4778
AXL	-24.9975	38.4837	-9.04134	3.4367e-18	8.15355e-17	30.4641
EPC2	-4.24406	15.0026	-9.0392	3.49506e-18	8.28187e-17	30.4475
NME1	14.2947	29.2152	9.03582	3.58915e-18	8.4996e-17	30.4213
CYS1	-13.3473	13.5044	-9.03554	3.59697e-18	8.51291e-17	30.4192
TTC3P1	-1.53029	2.75565	-9.02978	3.76355e-18	8.89626e-17	30.3746
EID2B	-1.15713	2.49698	-9.02944	3.77344e-18	8.91417e-17	30.372
CHST10	-2.1333	4.58231	-9.02707	3.84449e-18	9.07646e-17	30.3537
ITGB5	-23.8421	57.5611	-9.01903	4.09472e-18	9.65544e-17	30.2916
ZWINT	19.1708	37.0443	9.01702	4.15981e-18	9.80295e-17	30.276
LARP6	-5.45948	8.2747	-9.01569	4.20345e-18	9.89974e-17	30.2658
PACS1	-12.3982	34.5832	-9.01215	4.32186e-18	1.01724e-16	30.2384
PSMG3-AS1	-1.07151	2.43265	-9.01032	4.3844e-18	1.03133e-16	30.2243
CD300LB	-1.27372	1.88398	-9.009	4.42981e-18	1.04138e-16	30.2141
CARD8	-3.11644	8.44579	-9.00821	4.45748e-18	1.04725e-16	30.208
PLEKHM3	-3.2893	8.20839	-9.00761	4.47835e-18	1.05151e-16	30.2034
PDLIM4	-19.6655	27.5467	-9.00285	4.64865e-18	1.09018e-16	30.1666
RDX	-12.5171	25.3667	-9.00007	4.75125e-18	1.11356e-16	30.1452
SNN	-12.6032	27.659	-8.99887	4.79602e-18	1.12337e-16	30.1359
ASAP1	-7.9763	19.5115	-8.98844	5.20424e-18	1.21701e-16	30.0555
PRKAR2B	-23.6663	22.8942	-8.98841	5.20521e-18	1.21701e-16	30.0553
CEP126	-1.47373	2.60073	-8.98236	5.45772e-18	1.27527e-16	30.0087
AFF3	-1.64822	1.99639	-8.97978	5.569e-18	1.2997e-16	29.9888
PPP1R12B	-66.3029	59.0071	-8.97869	5.6169e-18	1.31009e-16	29.9804
SOGA1	-8.93581	15.1299	-8.97243	5.89831e-18	1.3749e-16	29.9322
PER1	-20.8839	28.5459	-8.97224	5.90731e-18	1.37616e-16	29.9307
JHY	-1.23542	2.32132	-8.9701	6.00679e-18	1.3985e-16	29.9143
ITGB1	-136.933	276.681	-8.96849	6.08281e-18	1.41534e-16	29.9019
NAGK	-4.92803	18.1812	-8.96834	6.0902e-18	1.41621e-16	29.9007
MEGF8	-6.65256	15.7067	-8.96805	6.10403e-18	1.41857e-16	29.8985
DUSP1	-353.952	482.427	-8.96504	6.24902e-18	1.45139e-16	29.8754
TAFA5	-6.63695	8.084	-8.96341	6.3294e-18	1.46918e-16	29.8628
NACC2	-20.4497	29.3204	-8.96327	6.33621e-18	1.46988e-16	29.8617
KDF1	9.72329	22.5848	8.9611	6.44441e-18	1.49408e-16	29.8451
MYOCD	-11.9113	10.7036	-8.96019	6.49068e-18	1.50391e-16	29.838
RARB	-2.34289	5.73818	-8.95002	7.02708e-18	1.62624e-16	29.7598
SLC25A10	6.19936	12.8289	8.94899	7.08355e-18	1.63833e-16	29.752
CARD8-AS1	-2.72251	6.84448	-8.94507	7.30377e-18	1.68826e-16	29.7218
MAPK11	-6.2094	12.9369	-8.94365	7.38508e-18	1.70603e-16	29.7109
PIK3R5	-3.10534	5.80838	-8.94222	7.46772e-18	1.72409e-16	29.7
MOB2	-8.2418	22.7285	-8.94061	7.56217e-18	1.74485e-16	29.6876
PIK3R6	-1.49954	3.35877	-8.93769	7.73653e-18	1.78402e-16	29.6652
TBC1D1	-15.7662	30.3907	-8.92941	8.25248e-18	1.90186e-16	29.6016
ARHGAP6	-3.29585	5.52481	-8.92558	8.50242e-18	1.95829e-16	29.5722
DPT	-42.1694	47.7691	-8.92028	8.8604e-18	2.03831e-16	29.5316
TRPS1	-3.96382	6.14658	-8.92016	8.86855e-18	2.03898e-16	29.5307
GABBR1	-5.59217	9.50533	-8.91908	8.94359e-18	2.055e-16	29.5224
SERTAD4-AS1	-14.6539	16.9957	-8.91733	9.06651e-18	2.08201e-16	29.509
HSPB7	-55.7065	46.9637	-8.90588	9.9113e-18	2.27466e-16	29.4213
HSPB8	-87.3751	84.5999	-8.90153	1.02519e-17	2.35143e-16	29.3881
FLYWCH1	-5.05862	14.4278	-8.89526	1.07637e-17	2.46735e-16	29.3401
SEC23A	-13.6128	30.4758	-8.8951	1.07778e-17	2.46912e-16	29.3388
THBS1-IT1	-3.7467	3.63923	-8.89294	1.09603e-17	2.50943e-16	29.3223
TSPAN7	-11.3042	14.6291	-8.89218	1.10246e-17	2.52267e-16	29.3165
PDE4B	-6.30846	10.9003	-8.88733	1.14482e-17	2.61804e-16	29.2794
ARID5B	-13.4236	27.4425	-8.8826	1.18761e-17	2.7143e-16	29.2433
PDE4DIP	-2.1745	6.68546	-8.87466	1.2631e-17	2.88343e-16	29.1826
TLCD5	-1.24457	2.5677	-8.87434	1.26622e-17	2.88885e-16	29.1802
ZNF585B	-1.86497	4.90509	-8.86955	1.3142e-17	2.99654e-16	29.1436
ATL3	-14.8285	40.8072	-8.86915	1.3183e-17	3.00411e-16	29.1405
PPP1R3F	-2.41803	4.15719	-8.86786	1.33155e-17	3.03252e-16	29.1307
NGFR	-21.2023	15.3714	-8.86559	1.35515e-17	3.08445e-16	29.1134
BVES	-7.3342	7.1494	-8.86206	1.39275e-17	3.16817e-16	29.0865
DTNA	-3.70909	3.82566	-8.86124	1.40162e-17	3.18645e-16	29.0802
PAIP2	-13.2453	42.4256	-8.85392	1.4834e-17	3.36842e-16	29.0244
TFE3	-15.744	47.641	-8.84907	1.54024e-17	3.49544e-16	28.9874
FZD7	-17.109	24.6827	-8.84856	1.54635e-17	3.50723e-16	28.9835
TRPC6	-1.42202	2.77827	-8.84772	1.55635e-17	3.52785e-16	28.9772
PDGFD	-11.3891	16.9134	-8.84662	1.56969e-17	3.556e-16	28.9688
AGPAT4	-1.98068	3.82555	-8.84411	1.60054e-17	3.62378e-16	28.9496
ZBTB22	-4.8417	21.1219	-8.84334	1.61011e-17	3.6433e-16	28.9437
UVRAG	-4.20162	14.3344	-8.84173	1.63027e-17	3.68675e-16	28.9315
PGM5	-52.0142	47.9494	-8.83854	1.67096e-17	3.77656e-16	28.9072
POGLUT3	-12.7404	32.0119	-8.83004	1.78453e-17	4.02619e-16	28.8425
UNKL	-2.07109	6.31771	-8.82528	1.85142e-17	4.17223e-16	28.8063
FKBP5	-12.8295	20.5287	-8.82372	1.87389e-17	4.22039e-16	28.7944
MGAT1	-23.0122	80.0775	-8.82241	1.89297e-17	4.26088e-16	28.7845
MAP1LC3C	-1.85161	1.90309	-8.81979	1.93166e-17	4.34545e-16	28.7645
ZFHX3	-4.91116	9.99771	-8.81949	1.93609e-17	4.35289e-16	28.7623
KLF12	-4.38863	6.44223	-8.81668	1.97861e-17	4.44589e-16	28.7409
ADCYAP1	-2.75377	2.48311	-8.81596	1.98956e-17	4.4679e-16	28.7355
GPM6B	-7.04689	8.30257	-8.81517	2.00179e-17	4.49276e-16	28.7294
BSPRY	10.747	22.0292	8.81403	2.01948e-17	4.52982e-16	28.7208
KLF8	-1.49883	2.41394	-8.81279	2.03884e-17	4.5706e-16	28.7114
PINLYP	-1.29292	2.10805	-8.81231	2.04654e-17	4.5852e-16	28.7077
ARL14EP	-3.26946	11.6215	-8.81036	2.07755e-17	4.65198e-16	28.6929
HAND2	-48.7089	41.1739	-8.80972	2.08788e-17	4.6724e-16	28.688
RHOQP3	-1.08344	2.26665	-8.80755	2.12305e-17	4.7458e-16	28.6716
SYNE3	-2.15882	2.93877	-8.80755	2.12313e-17	4.7458e-16	28.6715
RAP1A	-24.1639	57.6576	-8.80569	2.15373e-17	4.80863e-16	28.6574
FBXL17	-2.54508	9.70399	-8.80458	2.17236e-17	4.84741e-16	28.649
RBMS1P1	-1.56911	3.17257	-8.80228	2.2111e-17	4.93102e-16	28.6316
SPEG	-16.1513	14.6992	-8.80169	2.22122e-17	4.95073e-16	28.6271
TAMALIN	-18.2956	22.2214	-8.79988	2.25256e-17	5.01769e-16	28.6133
CD1C	-7.42746	8.55673	-8.79941	2.26068e-17	5.03289e-16	28.6098
RAB23	-20.1232	20.3765	-8.79521	2.335e-17	5.19235e-16	28.5779
RTN4	-38.1562	106.499	-8.79385	2.35974e-17	5.24435e-16	28.5676
PDZRN4	-7.37791	6.73484	-8.79259	2.38272e-17	5.29237e-16	28.558
ACKR3	-28.1435	37.768	-8.78826	2.46351e-17	5.46869e-16	28.5252
CRYBG3	-4.27085	8.62209	-8.78608	2.5052e-17	5.55804e-16	28.5087
SVIL-AS1	-2.6677	7.6968	-8.78392	2.54736e-17	5.64833e-16	28.4923
KCNAB1	-1.57377	2.18523	-8.78183	2.58856e-17	5.73639e-16	28.4765
CYCS	35.7655	111.643	8.78104	2.60449e-17	5.76839e-16	28.4704
PRDM11	-1.82214	3.6133	-8.7807	2.6113e-17	5.78016e-16	28.4679
PDZD2	-2.0328	3.3386	-8.77875	2.65076e-17	5.86415e-16	28.4531
ZSWIM9	-3.29346	9.96995	-8.77821	2.66178e-17	5.88516e-16	28.449
PRKACA	-9.65575	33.8764	-8.77096	2.81466e-17	6.2125e-16	28.3941
KCND3	-5.18338	8.23297	-8.76693	2.90322e-17	6.39599e-16	28.3636
SMAD9	-8.4948	9.06977	-8.76688	2.90441e-17	6.39599e-16	28.3632
ST6GALNAC3	-1.13311	1.88764	-8.76281	2.99663e-17	6.5878e-16	28.3324
SRGAP2C	-1.31433	3.49889	-8.75857	3.096e-17	6.79854e-16	28.3003
ZSCAN12	-1.38254	4.01124	-8.75665	3.14188e-17	6.89536e-16	28.2859
SMG6	-2.18409	6.93168	-8.75651	3.14529e-17	6.89894e-16	28.2848
NRXN3	-5.51371	4.51076	-8.75539	3.17263e-17	6.95496e-16	28.2763
GLIPR1	-12.4143	17.903	-8.75431	3.19901e-17	7.00882e-16	28.2681
FAM126A	-2.55227	5.66471	-8.75111	3.27865e-17	7.17921e-16	28.2439
CEP120	-3.77953	12.5498	-8.74714	3.38019e-17	7.39737e-16	28.2139
NPTXR	-7.0555	7.99785	-8.74254	3.50164e-17	7.65449e-16	28.1792
TMEM35A	-7.28015	6.84249	-8.74099	3.54356e-17	7.74175e-16	28.1675
PLEKHH2	-2.73335	5.07139	-8.74043	3.55872e-17	7.77047e-16	28.1633
RNLS	-1.09917	2.16101	-8.73819	3.62057e-17	7.90106e-16	28.1463
CCDC149	-1.75151	5.52866	-8.73702	3.65331e-17	7.96801e-16	28.1375
GPR65	-2.07717	3.95029	-8.73518	3.70511e-17	8.07644e-16	28.1236
PCMTD1	-7.80441	28.1508	-8.73494	3.71198e-17	8.08685e-16	28.1218
EPB41L2	-13.9085	31.2228	-8.73314	3.76366e-17	8.19482e-16	28.1082
ADRB2	-1.95257	3.83502	-8.73298	3.76806e-17	8.19978e-16	28.107
CEP85L	-1.52098	4.16611	-8.73155	3.80973e-17	8.28578e-16	28.0962
ZFP36L1	-84.2408	212.622	-8.72756	3.92801e-17	8.53343e-16	28.0661
MYLK	-119.88	103.832	-8.72557	3.98858e-17	8.65528e-16	28.0511
HSD17B1P1	-2.57075	5.01931	-8.72399	4.03716e-17	8.75087e-16	28.0392
SIGLEC6	-1.47332	1.88465	-8.7239	4.03974e-17	8.75156e-16	28.0385
ANOS1	-3.49639	4.69418	-8.71281	4.39808e-17	9.52252e-16	27.9549
TBKBP1	-5.17772	10.8348	-8.70893	4.53081e-17	9.80441e-16	27.9257
INPP5A	-15.0491	33.3255	-8.70699	4.59865e-17	9.94412e-16	27.9111
PRR15L	63.9124	130.872	8.70693	4.60052e-17	9.94412e-16	27.9107
MAMLD1	-2.29659	3.49196	-8.70489	4.67316e-17	1.00955e-15	27.8952
PLEKHG2	-6.36604	14.5317	-8.6996	4.86616e-17	1.05065e-15	27.8554
PCDHB10	-1.73288	2.83126	-8.69825	4.91661e-17	1.06095e-15	27.8453
STEAP4	-9.99838	10.428	-8.6977	4.93719e-17	1.0648e-15	27.8412
WNT9A	-9.20741	9.65128	-8.69651	4.9826e-17	1.074e-15	27.8322
RGS2	-77.8676	109.115	-8.68449	5.46212e-17	1.17539e-15	27.7418
CLEC3B	-20.4435	23.1862	-8.68187	5.57218e-17	1.19774e-15	27.7221
TRIM6	-1.28125	1.8311	-8.68153	5.58668e-17	1.20019e-15	27.7196
RNU6-529P	-3.00299	3.77948	-8.68045	5.63327e-17	1.20953e-15	27.7114
LINC02035	-1.82299	4.29122	-8.67547	5.8515e-17	1.25569e-15	27.674
TAL1	-1.52757	2.21838	-8.67229	5.99548e-17	1.28515e-15	27.6501
CHRM2	-7.381	5.92357	-8.67129	6.04114e-17	1.29422e-15	27.6426
DENND2B	-6.13724	16.0205	-8.67111	6.0493e-17	1.29525e-15	27.6413
RCSD1	-7.28016	13.1082	-8.66945	6.12643e-17	1.31104e-15	27.6289
AMIGO1	-3.54833	6.7359	-8.66891	6.15211e-17	1.31581e-15	27.6247
FAM120C	-1.2846	3.16079	-8.66694	6.24496e-17	1.33345e-15	27.61
OLFM1	-5.21547	7.17632	-8.66533	6.32216e-17	1.34919e-15	27.5979
HYAL2	-10.9975	31.8362	-8.66437	6.36863e-17	1.35836e-15	27.5907
PRUNE2	-35.1905	29.7935	-8.66417	6.37871e-17	1.35976e-15	27.5892
CCR4	-3.85537	4.69518	-8.6553	6.82453e-17	1.45399e-15	27.5227
ANKRD44	-3.31232	6.31233	-8.65416	6.88429e-17	1.46592e-15	27.5141
AQP1	-124.23	187.131	-8.65386	6.90014e-17	1.46848e-15	27.5119
AKAP6	-2.67217	2.46442	-8.65326	6.93148e-17	1.47434e-15	27.5074
C1orf198	-20.2196	48.3728	-8.65309	6.94085e-17	1.47552e-15	27.5061
PTGDS	-48.5414	34.5047	-8.65216	6.99007e-17	1.48517e-15	27.4991
C8orf88	-13.5908	12.3527	-8.64835	7.19573e-17	1.52719e-15	27.4706
C22orf39	-4.35596	10.8753	-8.6467	7.28709e-17	1.54403e-15	27.4582
MOB3C	-4.00742	12.9538	-8.64635	7.3065e-17	1.5473e-15	27.4556
RN7SL138P	-2.79652	4.82779	-8.64582	7.33607e-17	1.55271e-15	27.4516
THSD7B	-1.19451	0.931643	-8.64456	7.40678e-17	1.56646e-15	27.4422
GNG2	-7.20001	13.2382	-8.64452	7.40914e-17	1.56646e-15	27.4418
NLGN4Y	-1.6848	1.79118	-8.64166	7.57211e-17	1.60004e-15	27.4204
SAP30-DT	-1.37482	2.49753	-8.64131	7.59207e-17	1.60338e-15	27.4179
LRIG1	-25.7607	54.6872	-8.64102	7.60931e-17	1.60614e-15	27.4156
ZNF461	-1.02423	2.6403	-8.64067	7.62953e-17	1.60953e-15	27.413
CASD1	-4.17012	12.4423	-8.63996	7.67057e-17	1.61731e-15	27.4077
LDB1	-19.3979	60.028	-8.63981	7.67952e-17	1.61831e-15	27.4066
KL	-1.99718	2.92734	-8.63971	7.68509e-17	1.6186e-15	27.4059
FBXO31	-7.31986	18.4355	-8.63777	7.79988e-17	1.64099e-15	27.3913
RAB11FIP3	-8.83128	22.1692	-8.63412	8.01907e-17	1.68619e-15	27.364
LNPEP	-5.87834	15.4531	-8.63137	8.18912e-17	1.72007e-15	27.3434
HMCN2	-3.28905	3.72048	-8.63018	8.26326e-17	1.7347e-15	27.3345
ABHD8	-6.7804	16.5656	-8.62986	8.28354e-17	1.73801e-15	27.3321
ZMAT1	-2.5107	4.04402	-8.6289	8.34426e-17	1.7498e-15	27.3249
PLP1	-7.03854	7.06207	-8.62377	8.6763e-17	1.81845e-15	27.2866
FES	-6.07653	13.7421	-8.62352	8.69235e-17	1.82036e-15	27.2847
HELQ	-1.84125	7.86132	-8.62349	8.69485e-17	1.82036e-15	27.2844
ZNF383	-1.1613	3.69562	-8.6226	8.75338e-17	1.83162e-15	27.2779
GNA14	-6.30039	8.99112	-8.61833	9.04259e-17	1.88907e-15	27.2459
LYST	-2.16528	6.94163	-8.61697	9.13642e-17	1.90661e-15	27.2357
PPP1R16B	-8.566	13.2859	-8.61621	9.18949e-17	1.91665e-15	27.23
CHIC1	-2.98516	5.77251	-8.61137	9.53361e-17	1.98735e-15	27.1939
MAP3K4-AS1	-4.1047	4.52903	-8.61074	9.57923e-17	1.99578e-15	27.1892
SOX5	-1.08812	1.57659	-8.6067	9.8777e-17	2.05686e-15	27.159
ACSM5	-1.36638	1.26428	-8.59928	1.04496e-16	2.17243e-15	27.1036
MBD5	-1.28858	3.89953	-8.59534	1.07662e-16	2.23706e-15	27.0743
KCNK2	-3.00166	3.34432	-8.59158	1.10778e-16	2.30057e-15	27.0462
AHDC1	-7.97888	18.7881	-8.58987	1.12221e-16	2.32927e-15	27.0335
SEMA5B	-1.13779	1.81977	-8.58806	1.13774e-16	2.35898e-15	27.02
BCL2L2	-15.5672	39.8174	-8.58792	1.13895e-16	2.36021e-15	27.0189
FOXP1	-6.07446	16.5318	-8.58452	1.16867e-16	2.41792e-15	26.9936
PLXND1	-23.2136	43.7403	-8.58137	1.19692e-16	2.47505e-15	26.9701
LINC00674	-7.4037	21.3651	-8.57989	1.21038e-16	2.50154e-15	26.9591
TSHZ3	-7.08495	8.91779	-8.57798	1.22803e-16	2.53666e-15	26.9449
LINC02829	-1.06134	0.921433	-8.5755	1.25135e-16	2.58346e-15	26.9264
PRAF2	-8.3906	18.3941	-8.56857	1.31868e-16	2.721e-15	26.8748
CYLD	-4.12744	12.6758	-8.56499	1.35494e-16	2.79284e-15	26.8481
ATP10D	-2.8407	8.96664	-8.56199	1.38597e-16	2.85529e-15	26.8259
POC1A	5.384	11.4752	8.56095	1.39701e-16	2.87648e-15	26.8181
RIC3	-1.6754	2.20645	-8.55956	1.41174e-16	2.90527e-15	26.8078
TNRC6C	-3.64493	7.51851	-8.55491	1.4622e-16	3.00751e-15	26.7732
BNIP2	-7.20689	22.6048	-8.55242	1.49004e-16	3.06151e-15	26.7547
SUSD6	-11.8916	39.5391	-8.55168	1.49839e-16	3.07704e-15	26.7492
C3AR1	-14.6607	26.4468	-8.55091	1.50709e-16	3.09326e-15	26.7435
RNF24	-6.42393	15.1129	-8.54738	1.54784e-16	3.17352e-15	26.7172
HSD11B1	-9.3488	11.3957	-8.54157	1.61724e-16	3.31319e-15	26.6741
DUSP22	-6.4527	20.9152	-8.54154	1.61768e-16	3.31319e-15	26.6738
CRBN	-3.13365	12.9875	-8.54006	1.63581e-16	3.34855e-15	26.6629
ARL6	-2.26537	6.59413	-8.53879	1.65164e-16	3.37916e-15	26.6534
IL16	-4.04361	6.23557	-8.53658	1.67941e-16	3.43418e-15	26.637
PLEKHM2	-14.7812	55.1602	-8.53286	1.72711e-16	3.52985e-15	26.6095
ARRDC3	-17.0253	45.8637	-8.52293	1.86145e-16	3.8004e-15	26.5358
LTC4S	-3.26548	8.36831	-8.52004	1.90243e-16	3.882e-15	26.5144
LINC02693	-1.54302	3.37644	-8.51679	1.94958e-16	3.97611e-15	26.4903
MS4A4A	-15.4788	24.0756	-8.5163	1.95689e-16	3.98892e-15	26.4866
LINC02587	-1.4889	1.30393	-8.51579	1.9644e-16	4.00211e-15	26.4829
KIT	-9.3217	17.2297	-8.51418	1.98831e-16	4.0487e-15	26.471
EDIL3	-10.6555	21.8316	-8.51284	2.00851e-16	4.08767e-15	26.461
SECISBP2L	-6.04998	20.376	-8.51021	2.0487e-16	4.16727e-15	26.4416
RRAS	-99.3196	204.521	-8.50916	2.06495e-16	4.19812e-15	26.4338
TIMP1	-550.145	857.635	-8.50891	2.06891e-16	4.20174e-15	26.4319
SPECC1L	-3.58753	10.9468	-8.50704	2.09814e-16	4.25663e-15	26.4181
TSPAN9	-19.4052	24.8289	-8.50504	2.12996e-16	4.31893e-15	26.4033
NREP	-9.38686	14.4405	-8.50482	2.1336e-16	4.32403e-15	26.4016
PIK3CA	-3.69182	10.2698	-8.50183	2.18213e-16	4.41775e-15	26.3795
CD14	-70.7463	125.149	-8.4998	2.2156e-16	4.48317e-15	26.3646
TXNDC17	7.84313	24.4447	8.49445	2.30659e-16	4.66239e-15	26.325
CD4	-19.439	38.1905	-8.49425	2.3101e-16	4.66706e-15	26.3235
ZSWIM6	-3.8189	14.8187	-8.4922	2.34601e-16	4.73713e-15	26.3083
FN1	-190.812	244.032	-8.49024	2.38078e-16	4.80482e-15	26.2939
PCLAF	8.01222	13.5228	8.48986	2.38766e-16	4.8162e-15	26.291
MED13L	-5.06438	16.7527	-8.48855	2.41129e-16	4.86133e-15	26.2813
TDRP	-3.44046	5.51132	-8.48822	2.41721e-16	4.87071e-15	26.2789
MICAL2	-14.5565	25.4955	-8.48792	2.42282e-16	4.87947e-15	26.2766
TCN2	-11.837	26.7489	-8.48705	2.43855e-16	4.9086e-15	26.2703
KPNA5	-2.57365	6.42914	-8.486	2.45787e-16	4.94492e-15	26.2625
LONRF2	-2.84961	3.56683	-8.48431	2.48933e-16	5.0056e-15	26.25
TRIM3	-2.21532	7.78176	-8.48291	2.51561e-16	5.05582e-15	26.2397
PAFAH1B1	-10.059	40.6292	-8.47909	2.58897e-16	5.19784e-15	26.2114
RNF216	-9.49485	25.5829	-8.46647	2.84621e-16	5.70541e-15	26.1183
MAPKAP1	-10.2381	37.4658	-8.4644	2.89071e-16	5.79161e-15	26.103
NIN	-4.24393	11.0536	-8.4612	2.96083e-16	5.92289e-15	26.0795
PKD1P3	-2.34647	4.4789	-8.45657	3.06541e-16	6.12891e-15	26.0454
LINC01589	-2.2495	2.78769	-8.4563	3.07172e-16	6.13836e-15	26.0433
MARCKS	-32.8547	125.762	-8.4533	3.14146e-16	6.27447e-15	26.0213
MTURN	-11.459	22.6216	-8.45044	3.20956e-16	6.40058e-15	26.0002
HSD17B6	-2.39677	4.06802	-8.44537	3.3339e-16	6.64167e-15	25.9628
CDK1	14.1346	26.8959	8.44049	3.45787e-16	6.88155e-15	25.9269
RBP5	-8.15698	11.6517	-8.4404	3.46017e-16	6.8826e-15	25.9263
ADAM23	-2.46077	3.26091	-8.43935	3.4876e-16	6.93358e-15	25.9185
ICA1L	-1.16776	1.85643	-8.43867	3.50518e-16	6.96495e-15	25.9136
ZNF329	-2.63	6.98021	-8.43693	3.55122e-16	7.04917e-15	25.9007
TNRC6A	-4.67674	15.6142	-8.43219	3.67945e-16	7.29623e-15	25.8659
NNMT	-58.5253	75.5575	-8.42797	3.79749e-16	7.52257e-15	25.8348
NTAN1	-4.83725	15.4825	-8.42593	3.85586e-16	7.63428e-15	25.8198
RPL18AP7	-1.07268	1.82945	-8.42308	3.93875e-16	7.7944e-15	25.7989
TRANK1	-5.52327	14.0029	-8.42015	4.02607e-16	7.95905e-15	25.7773
PKP3	38.8495	81.745	8.41538	4.17198e-16	8.23908e-15	25.7424
ZNF791	-3.13475	12.9297	-8.41176	4.28656e-16	8.46102e-15	25.7157
CERS5	-2.87777	11.7528	-8.41135	4.29954e-16	8.48232e-15	25.7127
SPOCK1	-17.0668	17.8848	-8.40837	4.39633e-16	8.66443e-15	25.6909
SMTN	-84.527	88.6006	-8.40826	4.39994e-16	8.66711e-15	25.6901
ITM2B	-40.1418	180.75	-8.40799	4.40873e-16	8.68e-15	25.6881
VCAM1	-12.0293	19.3851	-8.40717	4.43593e-16	8.72912e-15	25.682
SH3D19	-18.1618	42.7589	-8.39804	4.74838e-16	9.32972e-15	25.6151
TRPC4	-3.03302	3.08797	-8.39409	4.89045e-16	9.60398e-15	25.5862
REEP1	-7.8781	8.63102	-8.39373	4.90364e-16	9.62499e-15	25.5835
TCP11L2	-1.71475	4.37184	-8.39213	4.96267e-16	9.7359e-15	25.5718
ZNF34	-2.90993	7.81235	-8.39102	5.0038e-16	9.81162e-15	25.5636
RAB2B	-4.24781	17.3837	-8.38997	5.04296e-16	9.88339e-15	25.556
WFDC1	-4.77909	6.37042	-8.38966	5.05475e-16	9.90147e-15	25.5537
MEDAG	-34.8829	26.7534	-8.38274	5.32219e-16	1.04201e-14	25.503
TASL	-2.68869	5.72455	-8.37868	5.48541e-16	1.07288e-14	25.4733
ZFP90	-2.69056	9.21792	-8.3752	5.62962e-16	1.10052e-14	25.4478
GPIHBP1	-7.36876	5.99899	-8.37328	5.71049e-16	1.11577e-14	25.4338
PRRT3	-1.28625	3.11279	-8.37085	5.81472e-16	1.13556e-14	25.416
TMEM131L	-4.39784	9.39618	-8.36911	5.89039e-16	1.14918e-14	25.4033
DNAL1	-1.15594	4.43575	-8.36699	5.9842e-16	1.16689e-14	25.3878
GPATCH2L	-1.56715	5.10198	-8.36563	6.04482e-16	1.17811e-14	25.3779
HSPE1	40.6918	97.9616	8.36541	6.05493e-16	1.17949e-14	25.3762
CHN1	-6.33601	9.77363	-8.36394	6.12126e-16	1.19181e-14	25.3655
SCUBE2	-3.44062	4.88775	-8.36308	6.16081e-16	1.19891e-14	25.3592
EXTL2	-2.85853	8.37899	-8.36133	6.2412e-16	1.21394e-14	25.3464
NBPF8	-1.94635	4.83865	-8.36016	6.29609e-16	1.224e-14	25.3378
FNDC5	-3.53401	4.7816	-8.35909	6.34614e-16	1.23311e-14	25.33
CSRP1	-222.861	226.092	-8.35819	6.38897e-16	1.24018e-14	25.3234
APH1B	-2.37502	6.47922	-8.35512	6.53634e-16	1.26752e-14	25.301
CPNE2	-4.16562	11.2169	-8.35487	6.54826e-16	1.26919e-14	25.2992
SMIM10L2B	-1.10134	1.82522	-8.35401	6.59029e-16	1.2767e-14	25.2929
TUBG2	-5.7392	14.7245	-8.35382	6.59986e-16	1.27791e-14	25.2915
RCN3	-34.88	61.4734	-8.35373	6.60424e-16	1.27812e-14	25.2909
CAP2	-19.7565	20.4368	-8.35227	6.67615e-16	1.29139e-14	25.2802
COL5A2	-68.6707	102.064	-8.3494	6.81975e-16	1.31785e-14	25.2593
MOXD1	-10.016	11.5654	-8.34909	6.83588e-16	1.32031e-14	25.257
ZXDA	-1.28649	3.76599	-8.34793	6.895e-16	1.33106e-14	25.2485
TUSC1	-8.89813	22.6931	-8.34524	7.03364e-16	1.35715e-14	25.229
REV3L	-4.24205	10.3017	-8.34501	7.04573e-16	1.3588e-14	25.2273
CD28	-3.42862	4.81637	-8.34311	7.14614e-16	1.37748e-14	25.2134
TACR1	-1.75547	1.33635	-8.34294	7.15487e-16	1.37847e-14	25.2122
LXN	-22.2312	38.0033	-8.34242	7.18249e-16	1.3831e-14	25.2084
NFYB	-6.35848	20.0421	-8.3389	7.37263e-16	1.41831e-14	25.1827
CAVIN2	-34.8925	42.4731	-8.33783	7.43135e-16	1.42889e-14	25.1749
BST1	-3.92455	7.23643	-8.33774	7.43626e-16	1.42912e-14	25.1742
TMEM245	-19.3698	38.477	-8.33685	7.48581e-16	1.43722e-14	25.1677
CDS2	-4.95745	15.1776	-8.33572	7.54879e-16	1.44859e-14	25.1595
ZBTB46	-2.49713	5.93435	-8.33236	7.73935e-16	1.48368e-14	25.135
SIPA1	-16.4658	42.4185	-8.32861	7.95748e-16	1.52474e-14	25.1077
ZNF175	-1.09334	3.41178	-8.32464	8.19522e-16	1.56952e-14	25.0787
TMEM185A	-2.16791	6.99362	-8.32142	8.39269e-16	1.60638e-14	25.0553
HECA	-7.44771	25.1827	-8.32066	8.44039e-16	1.61407e-14	25.0498
CCND2-AS1	-1.45123	2.58935	-8.31151	9.03187e-16	1.72633e-14	24.9832
MORF4L1P1	-24.9375	87.5418	-8.30964	9.1579e-16	1.74955e-14	24.9696
SHISAL1	-10.0985	8.53079	-8.30648	9.37494e-16	1.79013e-14	24.9466
GPR176	-3.67365	6.42352	-8.30488	9.48616e-16	1.8099e-14	24.935
MOCS1	-4.30962	8.41784	-8.30486	9.48783e-16	1.8099e-14	24.9348
PHACTR1	-1.43506	2.40451	-8.30456	9.50853e-16	1.81295e-14	24.9327
PBK	14.9663	21.5754	8.30267	9.64255e-16	1.8367e-14	24.9189
RNF38	-8.39766	23.3825	-8.29399	1.0282e-15	1.95753e-14	24.8558
PXDC1	-18.7253	40.1318	-8.29057	1.05453e-15	2.00666e-14	24.831
IGFBP6	-69.5345	83.6358	-8.28805	1.07432e-15	2.04332e-14	24.8127
SERPINE2	-10.6006	14.1189	-8.2837	1.10942e-15	2.10904e-14	24.7811
VAMP4	-3.39885	12.5367	-8.28204	1.12307e-15	2.13185e-14	24.7691
GPR4	-4.49229	9.61732	-8.28071	1.13412e-15	2.15175e-14	24.7595
FAM110B	-4.25505	5.4793	-8.27962	1.1433e-15	2.16706e-14	24.7515
GPR173	-1.12498	1.66936	-8.27592	1.17496e-15	2.22597e-14	24.7247
EPB41L4A-DT	-1.06034	2.6395	-8.27422	1.18979e-15	2.25297e-14	24.7124
JAML	-3.16782	7.01544	-8.26957	1.23134e-15	2.33049e-14	24.6787
ZNF500	-1.58631	6.43155	-8.26829	1.24297e-15	2.35136e-14	24.6694
TLR5	-2.06493	4.8847	-8.26758	1.2495e-15	2.36255e-14	24.6643
FRRS1L	-3.5121	3.10119	-8.26611	1.26315e-15	2.38719e-14	24.6536
KCTD20	-14.1336	40.3574	-8.26185	1.30343e-15	2.45851e-14	24.6228
AFF1	-8.14659	26.6943	-8.26078	1.3137e-15	2.47668e-14	24.615
CNPY4	-5.5243	11.9604	-8.25877	1.33335e-15	2.5125e-14	24.6004
CCDC71L	-11.7205	25.0809	-8.25868	1.33419e-15	2.51285e-14	24.5998
ATP5MC1	20.0148	65.1204	8.25722	1.34865e-15	2.53885e-14	24.5892
CYP4F24P	-1.39097	1.65775	-8.25539	1.36698e-15	2.57211e-14	24.576
CPXM1	-57.4525	41.3024	-8.25517	1.36916e-15	2.57496e-14	24.5744
LAD1	67.8409	137.625	8.25145	1.40718e-15	2.64518e-14	24.5475
MERTK	-4.6363	11.9103	-8.25024	1.41983e-15	2.66764e-14	24.5387
REEP2	-7.12919	7.50154	-8.24593	1.4656e-15	2.7523e-14	24.5075
ADAMTS2	-20.2845	27.7564	-8.24418	1.48451e-15	2.78646e-14	24.4949
TSPYL4	-6.58964	20.8212	-8.24392	1.48745e-15	2.79062e-14	24.493
TLR1	-3.12865	6.84268	-8.24282	1.49951e-15	2.8119e-14	24.4851
UBE2D4	-2.57565	9.31412	-8.23422	1.59746e-15	2.99265e-14	24.4229
LINC00863	-1.28664	3.7648	-8.23369	1.60361e-15	3.00274e-14	24.4191
CCL19	-90.0003	79.6374	-8.23036	1.64343e-15	3.07431e-14	24.395
CHD9	-3.05142	10.8593	-8.22999	1.64782e-15	3.08103e-14	24.3924
BMPR1A	-5.8379	12.8661	-8.22548	1.70335e-15	3.18332e-14	24.3598
GADD45B	-52.7988	87.6078	-8.22523	1.70648e-15	3.18762e-14	24.358
ADAMTSL4	-7.97576	12.1653	-8.22513	1.70775e-15	3.18846e-14	24.3573
AIF1	-28.3798	58.4996	-8.22365	1.7264e-15	3.22173e-14	24.3466
PRIMA1	-16.2793	16.9262	-8.22086	1.76213e-15	3.28522e-14	24.3265
MARCHF1	-2.25714	4.47302	-8.21648	1.8197e-15	3.39092e-14	24.2949
GAP43	-4.85815	4.20535	-8.21142	1.88859e-15	3.51591e-14	24.2584
RAB11FIP5	-6.6654	20.1032	-8.21009	1.90716e-15	3.54877e-14	24.2488
VAT1	-45.535	112.921	-8.20851	1.9293e-15	3.58823e-14	24.2375
PTGS1	-9.36643	21.3968	-8.20234	2.01864e-15	3.75078e-14	24.193
GNG7	-4.14576	8.30479	-8.19891	2.07005e-15	3.84262e-14	24.1683
SNAI2	-12.0513	16.2482	-8.19754	2.09091e-15	3.87948e-14	24.1584
ATP1A2	-15.6593	14.4551	-8.19259	2.16807e-15	4.02072e-14	24.1228
PRNP	-100.504	164.301	-8.19169	2.18242e-15	4.04539e-14	24.1164
BLVRA	-17.2674	43.139	-8.18918	2.22296e-15	4.11657e-14	24.0983
UBE2Q2	-13.5464	36.2067	-8.18883	2.22859e-15	4.12504e-14	24.0958
EVI2A	-6.5441	13.6511	-8.18782	2.24528e-15	4.15194e-14	24.0885
SELENOP	-30.8121	46.6862	-8.18724	2.25471e-15	4.16738e-14	24.0843
METTL7A	-26.971	75.2665	-8.1799	2.37916e-15	4.3911e-14	24.0316
GFOD1	-4.29375	6.51965	-8.17945	2.3871e-15	4.40365e-14	24.0283
CFL2	-31.8748	32.746	-8.17702	2.42987e-15	4.48043e-14	24.0108
GALE	25.1329	52.4256	8.17598	2.44846e-15	4.51254e-14	24.0034
GNG12	-29.9682	98.0341	-8.17518	2.4627e-15	4.53662e-14	23.9977
TGFBR1	-16.8611	33.354	-8.17495	2.46691e-15	4.54222e-14	23.996
LRRC4B	-3.12158	4.66712	-8.17397	2.48461e-15	4.57044e-14	23.989
YPEL2	-3.90875	12.2494	-8.17079	2.54305e-15	4.67573e-14	23.9661
PCDHB15	-1.89796	3.2404	-8.17043	2.5498e-15	4.68591e-14	23.9635
SNTB2	-5.25667	16.5068	-8.16943	2.56858e-15	4.71818e-14	23.9563
CNTLN	-1.06599	2.28658	-8.16651	2.62387e-15	4.81745e-14	23.9354
CMTM8	12.9474	30.5126	8.16627	2.6286e-15	4.82384e-14	23.9336
VASN	-17.4445	29.1304	-8.16536	2.64608e-15	4.85362e-14	23.9271
KRTCAP3	27.7565	60.0571	8.16388	2.67478e-15	4.90392e-14	23.9165
CHRNA3	-7.41535	5.86339	-8.16132	2.72524e-15	4.99408e-14	23.8982
NAV2-AS6	-1.37688	1.4351	-8.16008	2.75019e-15	5.03741e-14	23.8892
PDPN	-18.0868	27.3678	-8.15925	2.76678e-15	5.06539e-14	23.8833
WDR81	-4.98025	16.0659	-8.15783	2.79568e-15	5.11588e-14	23.8731
ARSK	-1.20256	4.50659	-8.15725	2.80751e-15	5.13511e-14	23.869
CYTH4	-5.50851	12.1082	-8.15639	2.82526e-15	5.16511e-14	23.8628
RASGRP2	-9.67376	10.9425	-8.15435	2.86754e-15	5.23994e-14	23.8482
CROCCP3	-1.01596	2.27773	-8.15386	2.87797e-15	5.25651e-14	23.8446
KIAA1586	-2.30242	5.90607	-8.15282	2.89983e-15	5.29144e-14	23.8372
CCN4	-9.95282	12.7044	-8.15258	2.90494e-15	5.29826e-14	23.8354
PRRT1	-1.89328	3.00088	-8.15158	2.92618e-15	5.33449e-14	23.8283
CALU	-53.7431	134.103	-8.14942	2.97267e-15	5.41668e-14	23.8128
SMIM3	-13.9921	26.7955	-8.14236	3.12967e-15	5.70007e-14	23.7623
PTGFRN	-26.0536	56.5023	-8.13916	3.2035e-15	5.82904e-14	23.7394
ZHX2	-6.48608	19.292	-8.13749	3.24278e-15	5.89496e-14	23.7274
CACNA2D1	-7.01869	9.37614	-8.1333	3.34348e-15	6.0751e-14	23.6973
TPM2	-552.539	543.748	-8.13183	3.37946e-15	6.13478e-14	23.6868
TPSAB1	-49.7874	76.95	-8.12764	3.4842e-15	6.32195e-14	23.6569
POGLUT2	-4.85149	10.4621	-8.12641	3.51551e-15	6.37577e-14	23.6481
EGFLAM	-2.29846	3.71104	-8.12032	3.67469e-15	6.6582e-14	23.6046
XYLT1	-3.66577	8.2842	-8.11774	3.74455e-15	6.7816e-14	23.5861
TTYH2	-4.16395	6.27805	-8.10706	4.04676e-15	7.31863e-14	23.5099
GYG1	-20.4804	43.0708	-8.10659	4.06078e-15	7.34055e-14	23.5065
MYH11	-790.828	665.609	-8.10387	4.14176e-15	7.48344e-14	23.4871
KLHL36	-3.77711	15.2069	-8.1027	4.17704e-15	7.54366e-14	23.4787
FBXO30	-4.9341	10.1974	-8.09942	4.27765e-15	7.71815e-14	23.4554
ADCYAP1R1	-2.34459	2.2175	-8.09535	4.40596e-15	7.94594e-14	23.4263
ADHFE1	-1.17209	1.90713	-8.09494	4.41916e-15	7.96602e-14	23.4234
ESRP1	24.6329	55.765	8.09069	4.55775e-15	8.21202e-14	23.3931
MAP3K20	-29.5635	39.0699	-8.08905	4.61211e-15	8.3061e-14	23.3814
SEC31A	-14.5963	58.8994	-8.08888	4.61781e-15	8.31249e-14	23.3802
SNX33	-5.86556	20.0842	-8.08867	4.62505e-15	8.32164e-14	23.3787
ARHGEF26	-11.7747	12.3686	-8.08781	4.65391e-15	8.36968e-14	23.3726
RABEP1	-6.7299	24.135	-8.08716	4.67586e-15	8.40523e-14	23.368
ZNF512	-3.75105	12.7032	-8.08622	4.70808e-15	8.45923e-14	23.3612
PDPR2P	-1.23067	3.57228	-8.08495	4.75141e-15	8.5331e-14	23.3522
NLRP3	-2.50683	3.61249	-8.08485	4.75498e-15	8.53555e-14	23.3515
ZNF441	-1.69015	4.58473	-8.07426	5.13455e-15	9.19981e-14	23.2761
FBXL22	-8.30375	7.97461	-8.07217	5.21284e-15	9.33576e-14	23.2612
SLC25A42	-2.12484	6.83576	-8.07131	5.24515e-15	9.38928e-14	23.2551
RAB30	-2.2047	5.64705	-8.06777	5.38162e-15	9.62911e-14	23.2299
AGO4	-3.49074	13.8163	-8.06634	5.43771e-15	9.72497e-14	23.2197
AOAH	-5.73364	11.3188	-8.06618	5.44378e-15	9.73132e-14	23.2186
EPN2	-3.20092	9.66246	-8.06398	5.53115e-15	9.88294e-14	23.203
COX6A1	54.6003	176.439	8.06243	5.59367e-15	9.99002e-14	23.192
C3orf70	-8.27673	9.76293	-8.0621	5.60725e-15	1.00096e-13	23.1896
LINC01278	-5.80516	12.7978	-8.05964	5.70799e-15	1.01801e-13	23.1721
TPM1	-156.146	171.769	-8.05956	5.71107e-15	1.01809e-13	23.1716
MINDY2	-3.63248	11.302	-8.05792	5.7792e-15	1.02976e-13	23.1599
THEMIS2	-9.24169	21.031	-8.05674	5.82871e-15	1.0381e-13	23.1515
ARL6IP5	-40.9566	160.141	-8.05318	5.98083e-15	1.06421e-13	23.1262
ZNF347	-1.52509	3.41155	-8.05165	6.04763e-15	1.0756e-13	23.1153
TFDP2	-6.33933	15.2813	-8.05128	6.06355e-15	1.07794e-13	23.1128
MAPKBP1	-2.24053	7.21251	-8.05089	6.08063e-15	1.08048e-13	23.11
RNF166	-5.16617	16.6196	-8.04944	6.14484e-15	1.09139e-13	23.0997
BARX1-DT	-4.18699	4.10197	-8.04437	6.37427e-15	1.1311e-13	23.0637
ZNF467	-5.43301	13.792	-8.04309	6.43361e-15	1.1411e-13	23.0546
SRF	-37.4614	80.3841	-8.04151	6.50736e-15	1.15365e-13	23.0434
CTNNA3	-2.0368	1.69229	-8.03945	6.605e-15	1.17043e-13	23.0288
FLT1	-4.87058	13.1883	-8.03273	6.93344e-15	1.22806e-13	22.9811
ST3GAL2	-5.38156	13.2465	-8.03069	7.03626e-15	1.24571e-13	22.9667
PRKAG2	-5.10412	14.1578	-8.02932	7.10622e-15	1.25752e-13	22.957
ZNF236-DT	-1.41062	3.94758	-8.02413	7.37737e-15	1.3049e-13	22.9202
BZW2	19.2692	55.8134	8.02203	7.48972e-15	1.32417e-13	22.9054
PMP2	-1.32331	1.22454	-8.02081	7.55592e-15	1.33526e-13	22.8967
HIVEP2	-5.96168	14.834	-8.01661	7.78808e-15	1.37503e-13	22.867
GRID1	-1.81118	2.18343	-8.01487	7.88678e-15	1.39182e-13	22.8546
NOS3	-5.39236	10.5127	-8.01343	7.96851e-15	1.40496e-13	22.8445
ESRP2	11.7851	26.6226	8.01321	7.9812e-15	1.40655e-13	22.843
CD1E	-2.11958	2.59604	-8.01225	8.03709e-15	1.41576e-13	22.8361
CDH19	-3.91083	4.09847	-8.01196	8.05376e-15	1.41805e-13	22.8341
ANKRD35	-3.29648	5.03532	-8.00989	8.17469e-15	1.43869e-13	22.8194
ING4	-5.01538	21.9671	-8.00874	8.24274e-15	1.45e-13	22.8113
SETMAR	-2.14409	8.30312	-8.0055	8.43746e-15	1.48358e-13	22.7884
TPO	-1.29365	1.4101	-8.00396	8.53102e-15	1.49929e-13	22.7776
PTPN14	-3.03949	7.07965	-8.00095	8.71805e-15	1.53083e-13	22.7563
GATA2	-4.09581	8.05505	-8.0007	8.73405e-15	1.53294e-13	22.7545
TRGV7	-2.44559	4.37134	-7.99879	8.85492e-15	1.55345e-13	22.741
FAM78A	-4.03188	7.5606	-7.99269	9.25206e-15	1.62238e-13	22.6979
BMP6	-3.56043	7.19442	-7.99247	9.26682e-15	1.62424e-13	22.6963
FAM180B	-1.02939	0.978992	-7.99065	9.38904e-15	1.64491e-13	22.6835
C19orf44	-1.15995	3.84111	-7.98787	9.57821e-15	1.67729e-13	22.6639
PPP3CB	-10.3423	31.0914	-7.98465	9.80244e-15	1.71578e-13	22.6412
UCHL3	4.47281	10.2046	7.97756	1.03146e-14	1.80461e-13	22.5912
ZNF532	-5.97798	14.0714	-7.97731	1.03334e-14	1.80707e-13	22.5894
CERT1	-3.56024	16.5381	-7.97516	1.04939e-14	1.83432e-13	22.5743
CCNI	-51.6027	218.002	-7.97424	1.05635e-14	1.84565e-13	22.5678
USP20	-5.8815	19.5154	-7.97377	1.05991e-14	1.85103e-13	22.5645
CDH6	-1.39173	2.49137	-7.97355	1.06158e-14	1.85292e-13	22.5629
SPINT1-AS1	6.32164	14.3937	7.97351	1.06195e-14	1.85292e-13	22.5626
TEF	-5.63577	12.9366	-7.97262	1.06871e-14	1.86387e-13	22.5564
LOX	-17.1898	22.6745	-7.96146	1.15778e-14	2.0174e-13	22.4778
TNC	-109.278	101.863	-7.95982	1.1715e-14	2.04039e-13	22.4662
MCRIP1	-12.394	32.2413	-7.95409	1.22063e-14	2.125e-13	22.4259
DNAJB5	-20.377	19.9568	-7.95376	1.22356e-14	2.12914e-13	22.4235
TNFAIP8L2	-5.61366	12.0375	-7.95218	1.23741e-14	2.15227e-13	22.4125
PHKG1	-2.02341	3.08532	-7.94999	1.25704e-14	2.18445e-13	22.397
LYVE1	-21.1545	20.9934	-7.94569	1.29635e-14	2.25073e-13	22.3668
TNN	-4.0018	3.05641	-7.94492	1.30349e-14	2.26212e-13	22.3614
TLR4	-7.60689	14.7532	-7.94322	1.31942e-14	2.28873e-13	22.3495
CPA3	-34.5546	47.6997	-7.94152	1.3356e-14	2.31576e-13	22.3375
PTBP2	-2.63282	5.09225	-7.94057	1.34477e-14	2.33061e-13	22.3308
HSBP1L1	7.17892	19.3563	7.94016	1.34867e-14	2.33633e-13	22.328
SV2A	-3.03203	4.62364	-7.93621	1.38736e-14	2.40166e-13	22.3002
RUFY2	-1.5341	5.44489	-7.93618	1.38763e-14	2.40166e-13	22.3
HCFC1R1	-23.6322	61.8963	-7.93156	1.43426e-14	2.48125e-13	22.2676
PTTG1	16.5325	31.2127	7.92677	1.48419e-14	2.56534e-13	22.234
TOGARAM1	-1.50358	5.4808	-7.92232	1.53219e-14	2.64712e-13	22.2028
WDR47	-3.24882	10.7815	-7.91971	1.56099e-14	2.69568e-13	22.1845
AIFM1	11.4939	41.4567	7.91866	1.57276e-14	2.71478e-13	22.1771
SELPLG	-13.916	31.298	-7.91798	1.5804e-14	2.72675e-13	22.1724
PPP1R16A	6.64659	19.476	7.91558	1.6077e-14	2.77262e-13	22.1555
BCL6	-13.4136	24.3854	-7.91405	1.62541e-14	2.80066e-13	22.1448
SMARCA1	-11.1367	25.3528	-7.91176	1.65218e-14	2.84552e-13	22.1288
TACR2	-37.2017	30.8033	-7.91096	1.6616e-14	2.86047e-13	22.1232
ITGA4	-5.13283	10.6369	-7.90965	1.67722e-14	2.88607e-13	22.114
TRBV26OR9-2	-1.26369	1.03882	-7.90773	1.70045e-14	2.92474e-13	22.1005
CPE	-77.3575	85.867	-7.90765	1.70136e-14	2.925e-13	22.1
ECE1	-19.8297	62.951	-7.90624	1.71858e-14	2.95199e-13	22.0901
AAK1	-1.92317	6.52588	-7.90601	1.72142e-14	2.95556e-13	22.0885
[truncated: 6,621 more rows]
