# Supplementary material for: Clinical and Biological Significances of FBLN5 in Gastric Cancer
Source: Cancers (Basel). 2023 Jan 16;15(2):553. doi: 10.3390/cancers15020553 (PMC9856449; doi:10.3390/cancers15020553)
Supplement: Supplementary file 1 [file cancers-15-00553-s001.zip › Supplementary Table S3.xlsx]

## Sheet: GO
Description	GeneRatio	BgRatio	P value	P adjust	Q value	Count	Gene ID	Other
regulation of cellular component organization	1280/7182	2340/17910	5.62742e-53	6.07198e-49	4.53985e-49	1280	FBLN5/ZEB2/IGFBP7/SYDE1/TEK/S1PR1/PHLDB1/JAM3/NR2F1/DCN/ELN/EMILIN1/PMP22/LDLRAD4/PDGFRB/KIRREL1/SLIT2/SELP/DLG4/ZNF135/FLRT2/PRKD1/DENND5A/DDR2/DACT1/DLC1/SDC2/RAB31/NLGN2/SYT11/FBLN1/SERPINF1/FZD4/ARSB/IGFBP5/DAB2/LPAR1/APBB1/TGFB3/ARHGEF15/EHD2/SPART/LZTS1/AEBP1/NFATC4/GREM1/RHOQ/EID1/AR/SLIT3/HGF/MEF2C/IGFBP4/PRRX1/ISLR2/PALM/CAMK1D/ANTXR1/CLIC4/FEZ1/ACVRL1/FMNL3/THY1/CLIP3/FRZB/C4A/PARVA/NRP…	BP
intracellular signal transduction	1399/7182	2624/17910	8.87505e-50	4.78809e-46	3.57992e-46	1399	A2M/ZEB2/SYDE1/SEPTIN4/MAPK10/TEK/MAP3K3/ARHGAP31/CLIC2/TIMP2/HIC1/GUCY1B1/IL6ST/GUCY1A1/TNS2/HEG1/DCN/RAMP3/PECAM1/EMILIN1/PKD2/PREX2/PTGIR/PDGFRB/AKT3/SLIT2/ITPR1/SELP/HTR2A/MAP3K12/FIBIN/RHOJ/DCHS1/DLG4/ENG/NPR2/C1QTNF2/RAMP2/MDFIC/CYP1B1/PRKD1/MRAS/PLCL1/STARD8/DACT1/DLC1/ARHGEF17/FBLN1/FZD4/IGFBP5/SH2D3C/ARHGAP20/LPAR1/IL3RA/RASGRF2/TGFB3/ARHGEF15/DOK5/NFATC4/CYTH3/GREM1/RHOQ/SH3BP5/RGL1/ARH…	BP
regulation of response to stimulus	2121/7182	4275/17910	1.5172e-47	4.42488e-44	3.30836e-44	2121	FBLN5/RECK/A2M/ZEB2/C1S/RBMS3/C1R/SYDE1/SEPTIN4/MAPK10/ADGRA2/TEK/S1PR1/MAP3K3/ARHGAP31/CLIC2/TIMP2/MMRN2/HIC1/IL6ST/JAM3/GUCY1A1/EVC/HEG1/DCN/CD34/RAMP3/BICC1/PECAM1/EMILIN1/PKD2/PREX2/PTGIR/LDLRAD4/PDGFRB/LTBP1/AKT3/SLIT2/GLI1/TNFSF12/FBN1/ITPR1/VEGFC/SELP/HTR2A/TCF21/MAP3K12/SERPING1/RHOJ/HEYL/DLG4/ENG/NPR2/C1QTNF2/GPC6/RAMP2/BEND6/PRICKLE1/MDFIC/CYP1B1/PRKD1/RGS7BP/IL1R1/ZNF423/STARD8/DACT1/T…	BP
anatomical structure morphogenesis	1350/7182	2535/17910	1.85107e-47	4.42488e-44	3.30836e-44	1350	RECK/ZEB2/QKI/ADGRA2/TEK/S1PR1/MAP3K3/NDN/PHLDB1/CLEC14A/MGP/MMRN2/CNTN4/JAM3/LAMA2/HEG1/DCN/COL8A1/CD34/ELN/PECAM1/PTPRM/EMILIN1/PKD2/PREX2/BOC/PDGFRB/AKT3/SLIT2/GLI1/TNFSF12/FBN1/CDH11/COL8A2/VEGFC/TCF21/RHOJ/HEYL/DCHS1/DLG4/ENG/DOK6/GPC6/RAMP2/PRICKLE1/ZNF135/FLRT2/CYP1B1/PRKD1/TIE1/EDNRA/ZFPM2/MEOX2/DACT1/TBXA2R/DLC1/SDC2/CRISPLD2/FOXN3/FBLN1/SERPINF1/PTGIS/FZD4/IGFBP5/DAB2/S1PR3/LPAR1/APBB1/…	BP
negative regulation of cellular process	2252/7182	4580/17910	2.05046e-47	4.42488e-44	3.30836e-44	2252	RECK/A2M/FBXL7/ZEB2/IGFBP7/PLPP1/RBMS3/MAPK10/ADGRA2/TEK/S1PR1/MAP3K3/NDN/CLIC2/GAS7/PODN/TIMP2/MMRN2/HIC1/NR3C1/CNTN4/LRRC32/IL6ST/TNS2/JAZF1/NR2F1/HEG1/DCN/CD34/BICC1/PTPRM/JAM2/EMILIN1/PKD2/PTGIR/PMP22/LDLRAD4/PDGFRB/LTBP1/AKT3/KIRREL1/SLIT2/GLI1/FBN1/ITPR1/HTR2A/TCF21/MAP3K12/SERPING1/HEYL/DLG4/ENG/POU6F1/NPR2/RAMP2/BEND6/PRICKLE1/MDFIC/CYP1B1/PRKD1/TIE1/RUNX1T1/DENND5A/RGS7BP/ZFPM2/MEOX2/ZNF…	BP
system development	2282/7182	4670/17910	1.47507e-45	2.65267e-42	1.98333e-42	2282	RECK/ZEB2/QKI/SEPTIN4/ADGRA2/TEK/S1PR1/TCF4/MAP3K3/NDN/PHLDB1/ZNF521/CLEC14A/MGP/TIMP2/MMRN2/CNTN4/IL6ST/JAM3/TNS2/EVC/NR2F1/LAMA2/HEG1/DCN/BHLHE22/COL8A1/CD34/ELN/BICC1/PECAM1/PTPRM/EMILIN1/PKD2/PREX2/GNB4/PMP22/LDLRAD4/BOC/PDGFRB/LTBP1/AKT3/SLIT2/GLI1/TNFSF12/FBN1/CDH11/COL8A2/VEGFC/TCF21/RHOJ/HEYL/DCHS1/DLG4/ENG/POU6F1/NPR2/DOK6/GPC6/LUM/RAMP2/BEND6/BNC2/PRICKLE1/FLRT2/LOXL1/CYP1B1/PRKD1/TIE1/…	BP
regulation of developmental process	1361/7182	2598/17910	7.64745e-43	1.1788e-39	8.81355e-40	1361	RECK/ZEB2/SYDE1/ADGRA2/TEK/S1PR1/TCF4/MAP3K3/PHLDB1/MGP/TIMP2/MMRN2/CNTN4/IL6ST/NR2F1/LAMA2/DCN/CD34/PTPRM/EMILIN1/PMP22/LDLRAD4/BOC/PDGFRB/AKT3/SLIT2/GLI1/TNFSF12/FBN1/VEGFC/HTR2A/RHOJ/HEYL/DLG4/ENG/NPR2/LAMA4/GPC6/RAMP2/BEND6/PRICKLE1/ZNF135/FLRT2/CYP1B1/PRKD1/TIE1/RUNX1T1/DENND5A/ZFPM2/MEOX2/DDR2/OMD/DACT1/TBXA2R/DLC1/SDC2/NLGN2/FBLN1/SERPINF1/PTGIS/FZD4/ARSB/IGFBP5/PLPP7/DAB2/S1PR3/LPAR1/APBB…	BP
positive regulation of cellular metabolic process	1542/7182	3007/17910	2.6968e-42	3.63731e-39	2.71951e-39	1542	ERG/ZEB2/RBMS3/SEPTIN4/MAPK10/TEK/S1PR1/TCF4/MAP3K3/NDN/TIMP2/NR3C1/IL6ST/NR2F1/DCN/RAMP3/PECAM1/PKD2/PDGFRB/RNF180/GLI1/VEGFC/HTR2A/TCF21/MAP3K12/HEYL/DLG4/ENG/C1QTNF2/LUM/PRICKLE1/MDFIC/PRKD1/ZFPM2/MEOX2/ZNF423/DDR2/DACT1/DLC1/SPON1/FBLN1/FZD4/DAB2/LPAR1/APBB1/TGFB3/DOK5/MAF/GREM1/RHOQ/EBF3/AR/GLIS2/ECSCR/HGF/MEF2C/GLI3/ZEB1/IGFBP4/PRRX1/WWTR1/GLI2/SH3RF3/CREBL2/FLI1/PEA15/ANTXR1/FGF7/STAT5B/RO…	BP
regulation of multicellular organismal process	1601/7182	3144/17910	7.21052e-42	8.64462e-39	6.46333e-39	1601	RECK/ZEB2/SYDE1/ADGRA2/TEK/S1PR1/TCF4/MAP3K3/PHLDB1/CLIC2/MGP/TIMP2/MMRN2/CNTN4/LRRC32/IL6ST/GUCY1A1/NR2F1/LAMA2/HEG1/DCN/CD34/PTPRM/EMILIN1/PMP22/LDLRAD4/PDGFRB/LTBP1/AKT3/SLIT2/GLI1/SCN4B/TNFSF12/FBN1/ITPR1/VEGFC/SELP/HTR2A/SERPING1/RHOJ/HEYL/DLG4/ENG/NPR2/LAMA4/GPC6/LUM/RAMP2/BEND6/PRICKLE1/FLRT2/CYP1B1/PRKD1/TIE1/DENND5A/ZFPM2/IL1R1/PLCL1/MEOX2/ZNF423/DDR2/OMD/DACT1/TBXA2R/SDC2/CD200/NLGN2/SY…	BP
regulation of signaling	1816/7182	3635/17910	1.20084e-41	1.29571e-38	9.68765e-39	1816	RECK/A2M/ZEB2/RBMS3/SYDE1/SEPTIN4/MAPK10/ADGRA2/TEK/MAP3K3/ARHGAP31/CLIC2/TIMP2/SYNPO/MMRN2/HIC1/CNTN4/IL6ST/GUCY1A1/EVC/LAMA2/HEG1/DCN/RAMP3/BICC1/PECAM1/EMILIN1/PKD2/PREX2/PTGIR/LDLRAD4/PDGFRB/LTBP1/AKT3/SLIT2/GLI1/TNFSF12/FBN1/ITPR1/CDH11/VEGFC/SELP/HTR2A/TCF21/MAP3K12/RHOJ/HEYL/DLG4/ENG/NPR2/C1QTNF2/GPC6/RAMP2/BEND6/PRICKLE1/MDFIC/CYP1B1/PRKD1/RGS7BP/IL1R1/PLCL1/ZNF423/STARD8/DACT1/DLC1/ARHGE…	BP
response to organic substance	1595/7182	3138/17910	4.31171e-41	4.2294e-38	3.1622e-38	1595	IGFBP7/FSTL1/PLPP1/ADGRA2/TEK/S1PR1/MAP3K3/NDN/MMRN2/NR3C1/PLSCR4/LRRC32/IL6ST/NR2F1/DCN/RAMP3/RFTN2/EMILIN1/PKD2/PTGIR/LDLRAD4/PDGFRB/LTBP1/SLIT2/TNFSF12/FBN1/VEGFC/SELP/HTR2A/TCF21/FIBIN/HEYL/ENG/NPR2/LUM/RAMP2/FLRT2/LOXL1/CYP1B1/PRKD1/TIE1/MRAS/IL1R1/ZNF423/TBXA2R/LTBP2/RAB31/LRRC70/SERPINF1/PTGIS/FZD4/ARSB/IGFBP5/KCNJ8/DAB2/LPAR1/IL3RA/COL6A2/DHH/TGFB3/COLEC12/CDH5/DOK5/BACE1/ACKR1/NFATC4/SSC…	BP
regulation of cell communication	1790/7182	3589/17910	2.35328e-40	2.11599e-37	1.58206e-37	1790	RECK/A2M/ZEB2/RBMS3/SYDE1/SEPTIN4/MAPK10/ADGRA2/TEK/MAP3K3/ARHGAP31/CLIC2/TIMP2/SYNPO/MMRN2/HIC1/CNTN4/IL6ST/GUCY1A1/EVC/LAMA2/HEG1/DCN/RAMP3/BICC1/PECAM1/EMILIN1/PKD2/PREX2/PTGIR/LDLRAD4/PDGFRB/LTBP1/AKT3/SLIT2/GLI1/TNFSF12/FBN1/ITPR1/CDH11/VEGFC/SELP/HTR2A/TCF21/MAP3K12/RHOJ/HEYL/DLG4/ENG/NPR2/C1QTNF2/GPC6/RAMP2/BEND6/PRICKLE1/MDFIC/CYP1B1/PRKD1/RGS7BP/IL1R1/PLCL1/ZNF423/STARD8/DACT1/DLC1/ARHGE…	BP
cellular response to chemical stimulus	1573/7182	3100/17910	6.72528e-40	5.58198e-37	4.17348e-37	1573	FBLN5/IGFBP7/FSTL1/PLPP1/ADGRA2/S1PR1/MAP3K3/NDN/CLIC2/MMRN2/NR3C1/PLSCR4/GUCY1B1/LRRC32/IL6ST/JAM3/NR2F1/DCN/CD34/RAMP3/EMILIN1/PKD2/LDLRAD4/PDGFRB/LTBP1/SLIT2/TNFSF12/FBN1/VEGFC/TCF21/HEYL/DLG4/ENG/NPR2/RAMP2/FLRT2/CYP1B1/PRKD1/MRAS/IL1R1/ZNF423/TBXA2R/LTBP2/RAB31/SERPINF1/PTGIS/FZD4/IGFBP5/DAB2/LPAR1/IL3RA/TGFB3/COLEC12/CDH5/DOK5/BACE1/ACKR1/NFATC4/GREM1/RHOQ/SOD3/CYGB/TIMP3/AR/SLIT3/HGF/MEF2C…	BP
organelle organization	1691/7182	3372/17910	1.7454e-39	1.17741e-36	8.80317e-37	1691	ZEB2/NAP1L3/SYDE1/SEPTIN4/TEK/S1PR1/PHLDB1/NR3C1/JAM3/DCN/CD34/ELN/PKD2/PDGFRB/AKT3/KIRREL1/SLIT2/MAP3K12/RHOJ/DLG4/ZNF135/PRKD1/MRAS/SYNE1/DLC1/RAB31/ARHGEF17/NLGN2/SYT11/ARSB/LPAR1/APBB1/TGFB3/ARHGEF15/MAP1A/EHD2/SPART/RHOQ/MAP7D3/EID1/HGF/MEF2C/WWTR1/LURAP1/PALM/NRXN2/PRKG1/ANTXR1/FGF7/CLIC4/FEZ1/DAAM2/FMNL3/THY1/CLIP3/PARVA/NRP1/EML1/DPYSL3/CEP68/F8/NAV3/LEPROT/GEM/TUB/DZIP1/CNTNAP1/AFAP1/VIM…	BP
cellular protein modification process	1900/7182	3851/17910	1.74593e-39	1.17741e-36	8.80317e-37	1900	ERG/FBXL7/ZEB2/IGFBP7/FSTL1/PLPP1/MAN1C1/SEPTIN4/MAPK10/TEK/MAP3K3/TIMP2/IL6ST/TNS2/HEG1/DCN/RAMP3/PECAM1/PTPRM/FKBP7/EMILIN1/PKD2/LDLRAD4/PDGFRB/RNF180/LTBP1/AKT3/KIRREL1/SLIT2/FBN1/VEGFC/HTR2A/MAP3K12/DLG4/ENG/NPR2/C1QTNF2/PRICKLE1/LOXL1/MDFIC/PRKD1/TIE1/PLCL1/CRTAP/DDR2/DACT1/DLC1/SDC2/FBLN1/FZD4/IGFBP5/SH2D3C/DAB2/LPAR1/IL3RA/KCTD10/GALNT16/APBB1/RASGRF2/TGFB3/DOK5/GREM1/MARCHF2/EFEMP1/GALNT1…	BP
protein modification process	1900/7182	3851/17910	1.74593e-39	1.17741e-36	8.80317e-37	1900	ERG/FBXL7/ZEB2/IGFBP7/FSTL1/PLPP1/MAN1C1/SEPTIN4/MAPK10/TEK/MAP3K3/TIMP2/IL6ST/TNS2/HEG1/DCN/RAMP3/PECAM1/PTPRM/FKBP7/EMILIN1/PKD2/LDLRAD4/PDGFRB/RNF180/LTBP1/AKT3/KIRREL1/SLIT2/FBN1/VEGFC/HTR2A/MAP3K12/DLG4/ENG/NPR2/C1QTNF2/PRICKLE1/LOXL1/MDFIC/PRKD1/TIE1/PLCL1/CRTAP/DDR2/DACT1/DLC1/SDC2/FBLN1/FZD4/IGFBP5/SH2D3C/DAB2/LPAR1/IL3RA/KCTD10/GALNT16/APBB1/RASGRF2/TGFB3/DOK5/GREM1/MARCHF2/EFEMP1/GALNT1…	BP
phosphorylation	1186/7182	2243/17910	3.27066e-39	2.0759e-36	1.55209e-36	1186	ERG/ZEB2/MAPK10/TEK/MAP3K3/TIMP2/IL6ST/HEG1/RAMP3/PECAM1/EMILIN1/PKD2/LDLRAD4/PDGFRB/AKT3/KIRREL1/SLIT2/VEGFC/HTR2A/MAP3K12/DLG4/ENG/NPR2/C1QTNF2/MDFIC/PRKD1/TIE1/PLCL1/DDR2/DACT1/FBLN1/FZD4/LDB2/SH2D3C/DAB2/LPAR1/IL3RA/RASGRF2/TGFB3/DOK5/GREM1/EFEMP1/ARHGEF6/TIMP3/AR/HGF/MEF2C/IGFBP4/WWTR1/SH3RF3/CREBL2/PLPP3/CAMK1D/PEA15/FAM20C/FGF7/ACVRL1/THY1/CLIP3/RPS6KA2/NRP1/TMEM119/ADARB1/RASIP1/ANGPT1/GL…	BP
phosphorus metabolic process	1585/7182	3139/17910	1.02856e-38	6.16565e-36	4.60988e-36	1585	PDE1A/ERG/ZEB2/PLPP1/MAPK10/TEK/MAP3K3/TIMP2/GUCY1B1/IL6ST/GUCY1A1/TNS2/HEG1/RAMP3/PECAM1/PTPRM/EMILIN1/PKD2/LDLRAD4/PDGFRB/AKT3/KIRREL1/SLIT2/VEGFC/HTR2A/MAP3K12/DLG4/ENG/NPR2/C1QTNF2/MDFIC/PRKD1/TIE1/PLCL1/DDR2/DACT1/DLC1/FBLN1/PTGIS/FZD4/LDB2/SH2D3C/DAB2/LPAR1/IL3RA/RASGRF2/TGFB3/DOK5/GREM1/EFEMP1/RHOQ/ARHGEF6/TIMP3/AR/HGF/MEF2C/IGFBP4/WWTR1/SH3RF3/CREBL2/PLPP3/CAMK1D/PEA15/FAM20C/FGF7/RORA/AC…	BP
regulation of signal transduction	1640/7182	3265/17910	1.32646e-38	7.53289e-36	5.63212e-36	1640	RECK/A2M/ZEB2/RBMS3/SYDE1/SEPTIN4/MAPK10/ADGRA2/TEK/MAP3K3/ARHGAP31/CLIC2/TIMP2/MMRN2/HIC1/IL6ST/GUCY1A1/EVC/HEG1/DCN/RAMP3/BICC1/PECAM1/EMILIN1/PKD2/PREX2/PTGIR/LDLRAD4/PDGFRB/LTBP1/AKT3/SLIT2/GLI1/TNFSF12/FBN1/ITPR1/VEGFC/SELP/HTR2A/TCF21/MAP3K12/RHOJ/HEYL/DLG4/ENG/NPR2/C1QTNF2/GPC6/RAMP2/BEND6/PRICKLE1/MDFIC/CYP1B1/PRKD1/RGS7BP/IL1R1/ZNF423/STARD8/DACT1/DLC1/ARHGEF17/NLGN2/FBLN1/PTGIS/FZD4/IGF…	BP
cellular protein metabolic process	2332/7182	4871/17910	2.40082e-38	1.29524e-35	9.68415e-36	2332	RECK/A2M/ERG/FBXL7/ZEB2/IGFBP7/FSTL1/PLPP1/QKI/RBMS3/MAN1C1/SEPTIN4/MAPK10/TEK/MAP3K3/TIMP2/IL6ST/GGT5/TNS2/HEG1/DCN/RAMP3/PECAM1/PTPRM/FKBP7/EMILIN1/PKD2/LDLRAD4/PDGFRB/RNF180/LTBP1/AKT3/KIRREL1/SLIT2/FBN1/VEGFC/HTR2A/MAP3K12/SERPING1/DLG4/ENG/NPR2/C1QTNF2/PRICKLE1/LOXL1/MDFIC/PRKD1/TIE1/PLCL1/CRTAP/PAPLN/DDR2/DACT1/DLC1/SDC2/SPON1/FBLN1/FZD4/IGFBP5/SH2D3C/DAB2/LPAR1/IL3RA/KCTD10/GALNT16/APBB1/R…	BP
positive regulation of nitrogen compound metabolic process	1464/7182	2870/17910	2.75669e-38	1.41642e-35	1.05901e-35	1464	ERG/ZEB2/RBMS3/SEPTIN4/MAPK10/TEK/S1PR1/TCF4/MAP3K3/NDN/TIMP2/NR3C1/IL6ST/NR2F1/DCN/RAMP3/PECAM1/PKD2/PDGFRB/RNF180/GLI1/TNFSF12/VEGFC/HTR2A/TCF21/MAP3K12/HEYL/DLG4/ENG/C1QTNF2/LUM/PRICKLE1/MDFIC/PRKD1/ZFPM2/MEOX2/ZNF423/DDR2/DACT1/DLC1/SPON1/FBLN1/FZD4/DAB2/LPAR1/APBB1/TGFB3/DOK5/MAF/GREM1/RHOQ/EBF3/AR/GLIS2/ECSCR/HGF/MEF2C/GLI3/ZEB1/IGFBP4/PRRX1/WWTR1/GLI2/SH3RF3/CREBL2/FLI1/PEA15/ANTXR1/FGF7/S…	BP
phosphate-containing compound metabolic process	1572/7182	3115/17910	3.55932e-38	1.74569e-35	1.3052e-35	1572	PDE1A/ERG/ZEB2/PLPP1/MAPK10/TEK/MAP3K3/TIMP2/GUCY1B1/IL6ST/GUCY1A1/TNS2/HEG1/RAMP3/PECAM1/PTPRM/EMILIN1/PKD2/LDLRAD4/PDGFRB/AKT3/KIRREL1/SLIT2/VEGFC/HTR2A/MAP3K12/DLG4/ENG/NPR2/C1QTNF2/MDFIC/PRKD1/TIE1/PLCL1/DDR2/DACT1/DLC1/FBLN1/PTGIS/FZD4/LDB2/SH2D3C/DAB2/LPAR1/IL3RA/RASGRF2/TGFB3/DOK5/GREM1/EFEMP1/RHOQ/ARHGEF6/TIMP3/AR/HGF/MEF2C/IGFBP4/WWTR1/SH3RF3/CREBL2/PLPP3/CAMK1D/PEA15/FAM20C/FGF7/RORA/AC…	BP
positive regulation of metabolic process	1656/7182	3313/17910	1.70069e-37	7.97843e-35	5.96524e-35	1656	ERG/ZEB2/QKI/RBMS3/SEPTIN4/MAPK10/TEK/S1PR1/TCF4/MAP3K3/NDN/TIMP2/NR3C1/LRRC32/IL6ST/NR2F1/DCN/CD34/RAMP3/PECAM1/EMILIN1/PKD2/PDGFRB/RNF180/GLI1/TNFSF12/VEGFC/HTR2A/TCF21/MAP3K12/HEYL/DLG4/ENG/C1QTNF2/LUM/RAMP2/PRICKLE1/MDFIC/PRKD1/ZFPM2/MEOX2/ZNF423/DDR2/DACT1/DLC1/SPON1/FBLN1/FZD4/DAB2/LPAR1/APBB1/TGFB3/DOK5/MAF/GREM1/RHOQ/EBF3/AR/GLIS2/ECSCR/HGF/MEF2C/GLI3/ZEB1/IGFBP4/PRRX1/WWTR1/GLI2/SH3RF3/P…	BP
cell surface receptor signaling pathway	1443/7182	2831/17910	1.92348e-37	8.64767e-35	6.46561e-35	1443	RECK/ZEB2/FSTL1/RBMS3/MAPK10/ADGRA2/TEK/S1PR1/MAP3K3/NDN/MMRN2/HIC1/LRRC32/IL6ST/EVC/DCN/BICC1/EMILIN1/PKD2/PTGIR/LDLRAD4/BOC/PDGFRB/LTBP1/SLIT2/GLI1/TNFSF12/FBN1/VEGFC/HEYL/DLG4/ENG/NPR2/GPC6/BEND6/PRICKLE1/FLRT2/MDFIC/PRKD1/IL1R1/ZNF423/DDR2/DACT1/SDC2/LTBP2/CLEC1A/NLGN2/FZD4/IGFBP5/DAB2/S1PR3/IL3RA/CYSLTR1/TGFB3/CDH5/DOK5/ACKR1/NFATC4/GREM1/EFEMP1/RHOQ/TIMP3/MCC/AR/GLIS2/ADGRD1/SLIT3/HGF/MEF2C…	BP
macromolecule modification	1964/7182	4027/17910	5.30697e-37	2.27531e-34	1.70118e-34	1964	ERG/FBXL7/ZEB2/IGFBP7/FSTL1/PLPP1/MAN1C1/SEPTIN4/MAPK10/TEK/MAP3K3/TIMP2/IL6ST/TNS2/HEG1/DCN/RAMP3/PECAM1/PTPRM/FKBP7/EMILIN1/PKD2/LDLRAD4/PDGFRB/RNF180/LTBP1/AKT3/KIRREL1/SLIT2/FBN1/VEGFC/HTR2A/MAP3K12/DLG4/ENG/NPR2/C1QTNF2/PRICKLE1/LOXL1/MDFIC/PRKD1/TIE1/PLCL1/CRTAP/DDR2/DACT1/DLC1/SDC2/FBLN1/FZD4/IGFBP5/SH2D3C/DAB2/LPAR1/IL3RA/KCTD10/GALNT16/APBB1/RASGRF2/TGFB3/DOK5/GREM1/MARCHF2/EFEMP1/GALNT1…	BP
positive regulation of macromolecule metabolic process	1534/7182	3041/17910	5.48267e-37	2.27531e-34	1.70118e-34	1534	ERG/ZEB2/QKI/RBMS3/SEPTIN4/MAPK10/TEK/S1PR1/TCF4/MAP3K3/NDN/TIMP2/NR3C1/LRRC32/IL6ST/NR2F1/DCN/CD34/RAMP3/PECAM1/EMILIN1/PKD2/PDGFRB/RNF180/GLI1/TNFSF12/VEGFC/HTR2A/TCF21/MAP3K12/HEYL/DLG4/ENG/C1QTNF2/LUM/RAMP2/PRICKLE1/MDFIC/PRKD1/ZFPM2/MEOX2/ZNF423/DDR2/DACT1/DLC1/SPON1/FBLN1/FZD4/DAB2/LPAR1/APBB1/TGFB3/DOK5/MAF/GREM1/RHOQ/EBF3/AR/GLIS2/ECSCR/HGF/MEF2C/GLI3/ZEB1/IGFBP4/PRRX1/WWTR1/GLI2/SH3RF3/P…	BP
protein phosphorylation	990/7182	1835/17910	8.30737e-37	3.31987e-34	2.48217e-34	990	ERG/ZEB2/MAPK10/TEK/MAP3K3/TIMP2/IL6ST/HEG1/RAMP3/PECAM1/EMILIN1/PKD2/LDLRAD4/PDGFRB/AKT3/KIRREL1/SLIT2/VEGFC/HTR2A/MAP3K12/DLG4/ENG/NPR2/C1QTNF2/MDFIC/PRKD1/TIE1/PLCL1/DDR2/DACT1/FBLN1/FZD4/SH2D3C/DAB2/LPAR1/IL3RA/RASGRF2/TGFB3/DOK5/GREM1/EFEMP1/ARHGEF6/TIMP3/AR/HGF/MEF2C/IGFBP4/WWTR1/SH3RF3/CREBL2/PLPP3/CAMK1D/PEA15/FAM20C/FGF7/ACVRL1/THY1/CLIP3/RPS6KA2/NRP1/TMEM119/ADARB1/RASIP1/ANGPT1/GLIPR2/…	BP
cell adhesion	756/7182	1338/17910	2.01961e-36	7.78271e-34	5.8189e-34	756	FBLN5/IGFBP7/TEK/S1PR1/CNTN4/LRRC32/IL6ST/JAM3/LAMA2/COL8A1/CD34/PECAM1/ENTPD1/PTPRM/JAM2/EMILIN1/MPDZ/BOC/ECM2/KIRREL1/FBN1/CDH11/COL8A2/CCDC80/SELP/MFAP4/DCHS1/ENG/COL14A1/LAMA4/FLRT2/CYP1B1/DDR2/OMD/PCDHGB7/ISLR/DLC1/SSPN/CD200/NLGN2/FBLN1/PCDH18/FZD4/SCARF2/COL6A2/THBS3/ITGBL1/CYTH3/GREM1/STAB1/SVEP1/PCDHB4/GLI3/FAT4/GLI2/NRXN2/NID1/ABI3BP/AOC3/PLPP3/PRKG1/COL15A1/ANTXR1/STAT5B/FEZ1/ACVRL1/CD…	BP
cellular response to organic substance	1317/7182	2564/17910	7.85894e-36	2.92407e-33	2.18624e-33	1317	IGFBP7/FSTL1/PLPP1/ADGRA2/S1PR1/MAP3K3/NDN/MMRN2/NR3C1/PLSCR4/LRRC32/IL6ST/NR2F1/DCN/RAMP3/EMILIN1/PKD2/LDLRAD4/PDGFRB/LTBP1/SLIT2/TNFSF12/FBN1/VEGFC/TCF21/HEYL/ENG/NPR2/RAMP2/FLRT2/CYP1B1/PRKD1/MRAS/IL1R1/ZNF423/TBXA2R/LTBP2/RAB31/SERPINF1/PTGIS/FZD4/IGFBP5/DAB2/LPAR1/IL3RA/TGFB3/COLEC12/CDH5/DOK5/BACE1/ACKR1/NFATC4/GREM1/RHOQ/TIMP3/AR/SLIT3/HGF/MEF2C/ZEB1/GLP2R/FAT4/GLI2/PTGFR/FAM20C/FGF7/ZNF36…	BP
regulation of multicellular organismal development	1097/7182	2077/17910	9.1515e-36	3.29149e-33	2.46095e-33	1097	RECK/ZEB2/SYDE1/ADGRA2/TEK/S1PR1/TCF4/MAP3K3/PHLDB1/MGP/TIMP2/MMRN2/CNTN4/IL6ST/NR2F1/LAMA2/DCN/CD34/PTPRM/EMILIN1/PMP22/LDLRAD4/PDGFRB/AKT3/SLIT2/GLI1/TNFSF12/FBN1/VEGFC/RHOJ/HEYL/DLG4/ENG/LAMA4/GPC6/RAMP2/BEND6/PRICKLE1/FLRT2/CYP1B1/PRKD1/TIE1/DENND5A/ZFPM2/MEOX2/DDR2/OMD/DACT1/TBXA2R/SDC2/NLGN2/SERPINF1/PTGIS/FZD4/ARSB/DAB2/S1PR3/LPAR1/APBB1/TGFB3/ARHGEF15/SPART/LZTS1/CDH5/NFATC4/MAF/GREM1/EFE…	BP
biological adhesion	756/7182	1345/17910	2.17559e-35	7.57247e-33	5.66171e-33	756	FBLN5/IGFBP7/TEK/S1PR1/CNTN4/LRRC32/IL6ST/JAM3/LAMA2/COL8A1/CD34/PECAM1/ENTPD1/PTPRM/JAM2/EMILIN1/MPDZ/BOC/ECM2/KIRREL1/FBN1/CDH11/COL8A2/CCDC80/SELP/MFAP4/DCHS1/ENG/COL14A1/LAMA4/FLRT2/CYP1B1/DDR2/OMD/PCDHGB7/ISLR/DLC1/SSPN/CD200/NLGN2/FBLN1/PCDH18/FZD4/SCARF2/COL6A2/THBS3/ITGBL1/CYTH3/GREM1/STAB1/SVEP1/PCDHB4/GLI3/FAT4/GLI2/NRXN2/NID1/ABI3BP/AOC3/PLPP3/PRKG1/COL15A1/ANTXR1/STAT5B/FEZ1/ACVRL1/CD…	BP
cellular developmental process	1978/7182	4088/17910	1.33442e-34	4.49951e-32	3.36416e-32	1978	RECK/A2M/ZEB2/QKI/SEPTIN4/ADGRA2/TEK/S1PR1/TCF4/MAP3K3/NDN/PHLDB1/ZNF521/MGP/TIMP2/CNTN4/IL6ST/JAM3/NR2F1/LAMA2/HEG1/BHLHE22/COL8A1/CD34/PECAM1/PTPRM/PREX2/PMP22/LDLRAD4/BOC/PDGFRB/AKT3/SLIT2/GLI1/TNFSF12/FBN1/CDH11/VEGFC/HTR2A/TCF21/HEYL/DCHS1/DLG4/ENG/NPR2/DOK6/RAMP2/BEND6/PRICKLE1/ZNF135/FLRT2/PRKD1/TIE1/RUNX1T1/DENND5A/EDNRA/ZFPM2/SYNE1/ZNF423/DDR2/DLC1/SDC2/FBLN1/SERPINF1/FZD4/ARSB/IGFBP5/PL…	BP
regulation of catalytic activity	1107/7182	2116/17910	7.80689e-34	2.55262e-31	1.90852e-31	1107	RECK/A2M/ZEB2/SYDE1/MAPK10/TEK/S1PR1/MAP3K3/ARHGAP31/TIMP2/HEG1/PKD2/PREX2/PDGFRB/RNF180/SLIT2/HTR2A/MAP3K12/DLG4/C1QTNF2/MDFIC/PRKD1/EDNRA/PAPLN/DDR2/STARD8/DLC1/CD200/FBLN1/FZD4/LDB2/ARHGAP20/LPAR1/TGFB3/ARHGEF15/GREM1/CYGB/ARHGEF6/TIMP3/ITIH5/HGF/MEF2C/FRY/WWTR1/AOC3/PRKG1/PEA15/ANTXR1/THY1/LEPR/C4A/COL6A3/NRP1/PCOLCE/ADARB1/ATP1B2/RASIP1/ANGPT1/PDE5A/ADAP2/PPM1F/ROR2/ADCY4/CNN3/RGS5/FAM13B/EP…	BP
cell proliferation	1040/7182	1969/17910	8.63216e-34	2.73944e-31	2.0482e-31	1040	PDE1A/FBXL7/ZEB2/IGFBP7/PLPP1/TEK/S1PR1/MAP3K3/NDN/PODN/TIMP2/LRRC32/IL6ST/TNS2/COL8A1/CD34/ELN/PTPRM/PKD2/PTGIR/PMP22/PDGFRB/AKT3/GLI1/TNFSF12/COL8A2/VEGFC/HTR2A/DCHS1/CYP1B1/PRKD1/EDNRA/ZFPM2/DDR2/DLC1/CD200/FBLN1/SERPINF1/IGFBP5/S1PR3/TGFB3/CDH5/GREM1/MCC/AR/SLIT3/HGF/MEF2C/GLI3/ZEB1/IGFBP4/PRRX1/WWTR1/GLP2R/FAT4/GLI2/PTGFR/PRKG1/FGF7/STAT5B/RORA/OGN/ACVRL1/LEPR/FRZB/RPS6KA2/RBFOX2/NRP1/CYP7B1…	BP
regulation of intracellular signal transduction	980/7182	1838/17910	9.05002e-34	2.78999e-31	2.08599e-31	980	A2M/ZEB2/SYDE1/SEPTIN4/MAPK10/TEK/MAP3K3/ARHGAP31/CLIC2/TIMP2/HIC1/IL6ST/GUCY1A1/HEG1/DCN/RAMP3/PECAM1/EMILIN1/PKD2/PREX2/PDGFRB/AKT3/SLIT2/ITPR1/SELP/HTR2A/MAP3K12/RHOJ/ENG/NPR2/C1QTNF2/MDFIC/CYP1B1/PRKD1/STARD8/DACT1/DLC1/ARHGEF17/FBLN1/FZD4/IGFBP5/ARHGAP20/LPAR1/RASGRF2/TGFB3/ARHGEF15/DOK5/CYTH3/GREM1/RHOQ/ARHGEF6/TIMP3/AR/HGF/IGFBP4/LURAP1/SH3RF3/PEA15/FGF7/RORA/NRP1/WWC3/PDE2A/LEPROT/KANK2/R…	BP
regulation of protein modification process	922/7182	1718/17910	4.98656e-33	1.49458e-30	1.11746e-30	922	ZEB2/SEPTIN4/MAPK10/TEK/MAP3K3/TIMP2/IL6ST/HEG1/RAMP3/PECAM1/EMILIN1/PKD2/LDLRAD4/PDGFRB/RNF180/KIRREL1/SLIT2/VEGFC/HTR2A/MAP3K12/DLG4/ENG/C1QTNF2/PRICKLE1/MDFIC/PRKD1/PLCL1/CRTAP/DDR2/DACT1/DLC1/FBLN1/FZD4/DAB2/LPAR1/TGFB3/DOK5/GREM1/TIMP3/EID1/AR/HGF/FRY/IGFBP4/WWTR1/SH3RF3/CREBL2/PLPP3/PEA15/FGF7/ACVRL1/THY1/CLIP3/NRP1/TMEM119/ADARB1/RASIP1/ANGPT1/GLIPR2/PDE5A/PPM1F/ROR2/FZD1/NOTCH2/ADCY4/BCL2…	BP
positive regulation of molecular function	882/7182	1636/17910	1.86532e-32	5.43966e-30	4.06708e-30	882	ZEB2/SYDE1/MAPK10/TEK/S1PR1/MAP3K3/ARHGAP31/CLIC2/TIMP2/PKD2/PREX2/PDGFRB/HTR2A/MAP3K12/DLG4/C1QTNF2/MDFIC/PRKD1/EDNRA/PLCL1/DDR2/STARD8/DACT1/DLC1/SPON1/CD200/FBLN1/FZD4/ARHGAP20/LPAR1/TGFB3/ARHGEF15/GREM1/ARHGEF6/AR/HGF/MEF2C/PLPP3/CAMK1D/PEA15/ANTXR1/THY1/NRP1/PCOLCE/ATP1B2/ANGPT1/PDE5A/ADAP2/PPM1F/ROR2/ANK2/FZD1/ADCY4/RGS5/FAM13B/SERINC1/BCL2/MAGI2/STING1/NLGN3/ROBO1/SKI/CSF1R/TBC1D19/ARHGAP2…	BP
regulation of cell differentiation	960/7182	1808/17910	3.7237e-32	1.05734e-29	7.90539e-30	960	RECK/ZEB2/ADGRA2/TCF4/PHLDB1/TIMP2/CNTN4/IL6ST/NR2F1/CD34/PMP22/LDLRAD4/BOC/SLIT2/GLI1/FBN1/VEGFC/HTR2A/HEYL/DLG4/ENG/NPR2/RAMP2/BEND6/PRICKLE1/FLRT2/PRKD1/RUNX1T1/DENND5A/ZFPM2/DDR2/SDC2/FBLN1/SERPINF1/FZD4/ARSB/IGFBP5/PLPP7/DAB2/S1PR3/LPAR1/APBB1/TGFB3/EHD2/SPART/LZTS1/CDH5/NFATC4/MAF/GREM1/EFEMP1/EID1/AR/HGF/MEF2C/GLI3/ZEB1/PRRX1/WWTR1/ISLR2/FAT4/GLI2/CREBL2/CAMK1D/FAM20C/STAT5B/FEZ1/DAAM2/ROR…	BP
cellular localization	1289/7182	2548/17910	3.97549e-31	1.09989e-28	8.22352e-29	1289	FBLN5/MAPK10/CLIC2/RAMP3/PKD2/ITPR1/HTR2A/DCHS1/DLG4/COPZ2/GPC6/RAMP2/PRICKLE1/MDFIC/DENND5A/SYNE1/LTBP2/RAB31/NLGN2/SYT11/DAB2/MAP1A/EHD2/BACE1/RHOQ/TRPC1/AR/GLIS2/MEF2C/GLI3/STOM/PALM/NRXN2/FGF7/FEZ1/GPRASP1/SGCD/THY1/CLIP3/NRP1/SYNDIG1/CEP68/F8/LEPROT/KLF7/GEM/TUB/ANGPT1/DZIP1/CNTNAP1/DYNC2H1/CC2D2A/MSN/PPM1F/ANK2/RILPL1/PKIG/TTC7B/EPHA3/FOXF1/BCL2/MAGI2/TTBK2/NLGN3/ATXN1/FERMT2/MAP1B/TUBA1A/M…	BP
animal organ development	1663/7182	3403/17910	6.75911e-31	1.82327e-28	1.36321e-28	1663	ZEB2/SEPTIN4/TEK/S1PR1/PHLDB1/MGP/CNTN4/JAM3/TNS2/EVC/LAMA2/HEG1/DCN/COL8A1/CD34/ELN/BICC1/PECAM1/PTPRM/EMILIN1/PKD2/GNB4/LDLRAD4/PDGFRB/LTBP1/AKT3/SLIT2/GLI1/FBN1/COL8A2/VEGFC/TCF21/RHOJ/HEYL/DCHS1/ENG/POU6F1/NPR2/GPC6/LUM/RAMP2/BNC2/PRICKLE1/FLRT2/CYP1B1/MRAS/EDNRA/ZFPM2/MEOX2/DDR2/OMD/DACT1/DLC1/CRISPLD2/FOXN3/SERPINF1/PTGIS/PCDH18/FZD4/LDB2/IGFBP5/KCNJ8/DAB2/LPAR1/DHH/THBS3/TGFB3/ARHGEF15/SPA…	BP
positive regulation of response to stimulus	1187/7182	2322/17910	7.64524e-31	2.012e-28	1.50432e-28	1187	RECK/A2M/ZEB2/C1S/C1R/SEPTIN4/MAPK10/ADGRA2/TEK/S1PR1/MAP3K3/TIMP2/HIC1/IL6ST/GUCY1A1/EVC/DCN/RAMP3/PECAM1/PKD2/PDGFRB/AKT3/SLIT2/GLI1/TNFSF12/VEGFC/SELP/HTR2A/MAP3K12/SERPING1/DLG4/ENG/NPR2/C1QTNF2/MDFIC/CYP1B1/PRKD1/IL1R1/ZNF423/DACT1/TBXA2R/NLGN2/LRRC70/PTGIS/FZD4/IGFBP5/SH2D3C/DAB2/LPAR1/APBB1/TGFB3/COLEC12/DOK5/NFATC4/SH3BGRL/GREM1/TIMP3/AR/HGF/MEF2C/IGFBP4/PRRX1/LURAP1/SH3RF3/PLPP3/CAMK1D/P…	BP
cellular component morphogenesis	556/7182	959/17910	1.39772e-30	3.5908e-28	2.68474e-28	556	ZEB2/TEK/NDN/PHLDB1/CNTN4/LAMA2/HEG1/PECAM1/PTPRM/PREX2/BOC/PDGFRB/SLIT2/CDH11/DLG4/DOK6/ZNF135/FLRT2/DLC1/SDC2/FBLN1/FZD4/LPAR1/APBB1/SPART/LZTS1/DOK5/NFATC4/GREM1/AR/SLIT3/HGF/MEF2C/GLI3/ISLR2/GLI2/PALM/ANTXR1/CLIC4/FEZ1/FMNL3/THY1/PARVA/RBFOX2/NRP1/TENM4/ADARB1/KLF7/CNTNAP1/MSN/ANK2/RILPL1/BCL2/NLGN3/ROBO1/FERMT2/MAP1B/CSF1R/SOX17/MYH10/CXCL12/SHANK3/BMPR2/SPARC/MYADM/FGD5/PDGFRA/ADD1/MAP6/PEA…	BP
cell morphogenesis	513/7182	873/17910	3.40061e-30	8.43812e-28	6.30894e-28	513	ZEB2/TEK/NDN/CNTN4/LAMA2/HEG1/PECAM1/PTPRM/PREX2/BOC/SLIT2/CDH11/DLG4/DOK6/ZNF135/FLRT2/DLC1/SDC2/FBLN1/FZD4/LPAR1/APBB1/SPART/LZTS1/DOK5/NFATC4/GREM1/AR/SLIT3/HGF/MEF2C/GLI3/ISLR2/GLI2/PALM/ANTXR1/CLIC4/FEZ1/FMNL3/THY1/PARVA/RBFOX2/NRP1/ADARB1/KLF7/CNTNAP1/MSN/RILPL1/BCL2/NLGN3/ROBO1/FERMT2/MAP1B/CSF1R/SOX17/MYH10/CXCL12/SHANK3/BMPR2/SPARC/MYADM/FGD5/ADD1/MAP6/PEAK1/LAMB2/LRP1/NUMBL/WTIP/GAB1/FY…	BP
positive regulation of catalytic activity	714/7182	1293/17910	3.44094e-30	8.43812e-28	6.30894e-28	714	ZEB2/SYDE1/MAPK10/TEK/S1PR1/MAP3K3/ARHGAP31/TIMP2/PKD2/PREX2/PDGFRB/HTR2A/MAP3K12/DLG4/C1QTNF2/MDFIC/PRKD1/EDNRA/DDR2/STARD8/DLC1/CD200/FBLN1/FZD4/ARHGAP20/LPAR1/TGFB3/ARHGEF15/GREM1/ARHGEF6/HGF/MEF2C/PEA15/ANTXR1/THY1/NRP1/PCOLCE/ATP1B2/ANGPT1/PDE5A/ADAP2/PPM1F/ROR2/ADCY4/RGS5/FAM13B/SERINC1/BCL2/MAGI2/ROBO1/CSF1R/TBC1D19/ARHGAP22/NRK/TGFBR2/PDGFRA/NOD1/CCN2/ADCY9/GNAI2/GSN/GHR/DOCK11/GNAO1/SH3P…	BP
cell differentiation	1881/7182	3923/17910	9.90488e-30	2.37497e-27	1.7757e-27	1881	RECK/A2M/ZEB2/QKI/SEPTIN4/ADGRA2/TEK/S1PR1/TCF4/NDN/PHLDB1/ZNF521/MGP/TIMP2/CNTN4/IL6ST/JAM3/NR2F1/LAMA2/HEG1/BHLHE22/COL8A1/CD34/PECAM1/PTPRM/PREX2/PMP22/LDLRAD4/BOC/PDGFRB/SLIT2/GLI1/TNFSF12/FBN1/CDH11/VEGFC/HTR2A/TCF21/HEYL/DCHS1/DLG4/ENG/NPR2/DOK6/RAMP2/BEND6/PRICKLE1/FLRT2/PRKD1/TIE1/RUNX1T1/DENND5A/EDNRA/ZFPM2/SYNE1/ZNF423/DDR2/SDC2/FBLN1/SERPINF1/FZD4/ARSB/IGFBP5/PLPP7/DAB2/S1PR3/LPAR1/APB…	BP
regulation of cellular protein metabolic process	1238/7182	2452/17910	2.53723e-29	5.95145e-27	4.44973e-27	1238	RECK/A2M/ZEB2/QKI/RBMS3/SEPTIN4/MAPK10/TEK/MAP3K3/TIMP2/IL6ST/HEG1/RAMP3/PECAM1/EMILIN1/PKD2/LDLRAD4/PDGFRB/RNF180/KIRREL1/SLIT2/VEGFC/HTR2A/MAP3K12/SERPING1/DLG4/ENG/C1QTNF2/PRICKLE1/MDFIC/PRKD1/PLCL1/CRTAP/PAPLN/DDR2/DACT1/DLC1/SPON1/FBLN1/FZD4/IGFBP5/DAB2/LPAR1/TGFB3/MAP1A/DOK5/GREM1/TIMP3/EID1/AR/ITIH5/ECSCR/HGF/FRY/IGFBP4/WWTR1/SH3RF3/CREBL2/PLPP3/PEA15/ANTXR1/FGF7/ACVRL1/THY1/CLIP3/C4A/COL6…	BP
cytoskeleton organization	631/7182	1124/17910	2.92101e-29	6.70588e-27	5.01379e-27	631	SYDE1/TEK/S1PR1/PHLDB1/JAM3/ELN/PKD2/PDGFRB/KIRREL1/SLIT2/RHOJ/ZNF135/MRAS/SYNE1/DLC1/ARHGEF17/LPAR1/TGFB3/ARHGEF15/MAP1A/EHD2/RHOQ/MAP7D3/MEF2C/LURAP1/PALM/PRKG1/ANTXR1/FGF7/CLIC4/DAAM2/FMNL3/THY1/CLIP3/NRP1/EML1/DPYSL3/CEP68/NAV3/CNTNAP1/AFAP1/VIM/CC2D2A/MSN/PPM1F/ANK2/NOTCH2/CNN3/EPHA3/BCL2/TTBK2/HDGFL3/NCKAP5L/MAP1B/CSF1R/MYH10/CXCL12/SHANK3/MYADM/FGD5/PDGFRA/CCN2/STARD9/ADD1/MAP6/GSN/TLN1/LR…	BP
regulation of molecular function	1506/7182	3065/17910	5.67866e-29	1.2573e-26	9.40047e-27	1506	RECK/A2M/ZEB2/SYDE1/MAPK10/TEK/S1PR1/MAP3K3/ARHGAP31/CLIC2/TIMP2/HEG1/RAMP3/PKD2/PREX2/PDGFRB/RNF180/SLIT2/SCN4B/TNFSF12/FBN1/VEGFC/HTR2A/MAP3K12/HEYL/DLG4/C1QTNF2/MDFIC/CYP1B1/PRKD1/EDNRA/PLCL1/PAPLN/DDR2/STARD8/DACT1/DLC1/SPON1/CD200/NLGN2/FBLN1/PTGIS/FZD4/LDB2/ARHGAP20/DAB2/REM1/LPAR1/TCEAL7/TGFB3/ARHGEF15/NFATC4/GREM1/EFEMP1/CYGB/ARHGEF6/TIMP3/AR/GLIS2/ITIH5/HGF/MEF2C/FRY/STOM/WWTR1/AOC3/PLPP…	BP
cell migration	794/7182	1474/17910	5.70971e-29	1.2573e-26	9.40047e-27	794	RECK/ZEB2/PLPP1/GYPC/SYDE1/ADGRA2/TEK/S1PR1/MAP3K3/NDN/CLEC14A/PODN/MMRN2/JAM3/LAMA2/DCN/CD34/PECAM1/PTPRM/JAM2/EMILIN1/LDLRAD4/PDGFRB/AKT3/SLIT2/TNFSF12/VEGFC/SELP/RHOJ/DCHS1/ENG/LAMA4/GPC6/FLRT2/CYP1B1/PRKD1/TIE1/IL1R1/MEOX2/DDR2/TBXA2R/DLC1/SDC2/CD200/SERPINF1/LDB2/ARSB/IGFBP5/DAB2/LPAR1/GREM1/CYGB/MCC/HGF/MEF2C/GLI3/LURAP1/PLPP3/CAMK1D/PRKG1/FGF7/STAT5B/CLIC4/ACVRL1/LHX6/FMNL3/THY1/PARVA/RBFO…	BP
regulation of phosphorylation	790/7182	1467/17910	9.07996e-29	1.95946e-26	1.46503e-26	790	ZEB2/MAPK10/TEK/MAP3K3/TIMP2/IL6ST/HEG1/RAMP3/PECAM1/EMILIN1/PKD2/LDLRAD4/PDGFRB/KIRREL1/SLIT2/VEGFC/HTR2A/MAP3K12/DLG4/ENG/C1QTNF2/MDFIC/PRKD1/PLCL1/DDR2/DACT1/FBLN1/FZD4/LDB2/DAB2/LPAR1/TGFB3/DOK5/GREM1/TIMP3/AR/HGF/IGFBP4/WWTR1/SH3RF3/CREBL2/PLPP3/PEA15/FGF7/ACVRL1/THY1/CLIP3/NRP1/TMEM119/ADARB1/RASIP1/ANGPT1/GLIPR2/PDE5A/PPM1F/ROR2/FZD1/NOTCH2/ADCY4/BCL2/IL34/ROBO1/THBS4/CSF1R/APLNR/BMPR2/MYA…	BP
regulation of protein phosphorylation	723/7182	1324/17910	1.25213e-28	2.64911e-26	1.98067e-26	723	ZEB2/MAPK10/TEK/MAP3K3/TIMP2/IL6ST/HEG1/RAMP3/PECAM1/EMILIN1/PKD2/LDLRAD4/PDGFRB/KIRREL1/SLIT2/VEGFC/HTR2A/MAP3K12/DLG4/ENG/C1QTNF2/MDFIC/PRKD1/PLCL1/DDR2/DACT1/FBLN1/FZD4/DAB2/LPAR1/TGFB3/DOK5/GREM1/TIMP3/AR/HGF/IGFBP4/WWTR1/SH3RF3/CREBL2/PLPP3/PEA15/FGF7/ACVRL1/THY1/CLIP3/NRP1/TMEM119/ADARB1/RASIP1/ANGPT1/GLIPR2/PDE5A/PPM1F/ROR2/FZD1/NOTCH2/ADCY4/BCL2/IL34/ROBO1/THBS4/CSF1R/APLNR/BMPR2/MYADM/NR…	BP
plasma membrane bounded cell projection organization	741/7182	1367/17910	4.52284e-28	9.38489e-26	7.01681e-26	741	ZEB2/S1PR1/NDN/CNTN4/JAM3/NR2F1/LAMA2/PTPRM/PKD2/PREX2/PMP22/BOC/SLIT2/CDH11/DLG4/DOK6/FLRT2/PRKD1/DENND5A/SDC2/SERPINF1/FZD4/ARSB/LPAR1/APBB1/TGFB3/MAP1A/SPART/LZTS1/DOK5/NFATC4/RHOQ/ARHGEF6/SLIT3/HGF/MEF2C/GLI3/PRRX1/WWTR1/ISLR2/FAT4/GLI2/PALM/CAMK1D/PRKG1/FEZ1/THY1/PARVA/RBFOX2/NRP1/DPYSL3/NAV3/ADARB1/KLF7/TUB/DZIP1/CNTNAP1/VIM/DYNC2H1/CC2D2A/FZD1/EPHA3/BCL2/MAGI2/TTBK2/HDGFL3/NLGN3/ROBO1/MAP1…	BP
protein localization	1215/7182	2417/17910	9.66527e-28	1.9677e-25	1.47119e-25	1215	FBLN5/MAPK10/LRRC32/HEG1/CD34/RAMP3/PKD2/LTBP1/FBN1/ITPR1/VEGFC/HTR2A/DCHS1/DLG4/COPZ2/GPC6/RAMP2/PRICKLE1/MDFIC/SYNE1/CAVIN1/LTBP2/RAB31/CD200/NLGN2/SYT11/DAB2/APBB1/TGFB3/MAP1A/EHD2/SSC5D/RHOQ/MCC/AR/GLIS2/GLI3/STOM/PALM/NRXN2/FGF7/SGCD/THY1/CLIP3/NRP1/SYNDIG1/CEP68/LEPROT/KLF7/ANGPT1/DZIP1/CNTNAP1/DYNC2H1/CC2D2A/MSN/PPM1F/RAB3IL1/ANK2/RILPL1/PKIG/TTC7B/EPHA3/BCL2/MAGI2/TTBK2/FERMT2/CSF1R/MYH10…	BP
regulation of protein metabolic process	1339/7182	2700/17910	1.47362e-27	2.94451e-25	2.20152e-25	1339	RECK/A2M/ZEB2/C1S/QKI/RBMS3/C1R/SEPTIN4/MAPK10/TEK/MAP3K3/TIMP2/IL6ST/HEG1/RAMP3/PECAM1/EMILIN1/PKD2/LDLRAD4/PDGFRB/RNF180/KIRREL1/SLIT2/TNFSF12/VEGFC/HTR2A/MAP3K12/SERPING1/DLG4/ENG/C1QTNF2/PRICKLE1/MDFIC/PRKD1/PLCL1/CRTAP/PAPLN/DDR2/DACT1/DLC1/SPON1/FBLN1/FZD4/IGFBP5/DAB2/LPAR1/APBB1/TGFB3/MAP1A/DOK5/GREM1/TIMP3/EID1/AR/ITIH5/ECSCR/HGF/FRY/IGFBP4/WWTR1/SH3RF3/CREBL2/PLPP3/PEA15/ANTXR1/FGF7/STAT…	BP
positive regulation of signal transduction	842/7182	1591/17910	1.85947e-27	3.62221e-25	2.70822e-25	842	RECK/ZEB2/SEPTIN4/MAPK10/ADGRA2/TEK/MAP3K3/TIMP2/HIC1/IL6ST/GUCY1A1/EVC/DCN/RAMP3/PECAM1/PKD2/PDGFRB/AKT3/GLI1/TNFSF12/SELP/HTR2A/MAP3K12/DLG4/ENG/NPR2/C1QTNF2/MDFIC/CYP1B1/PRKD1/IL1R1/ZNF423/DACT1/NLGN2/PTGIS/FZD4/IGFBP5/SH2D3C/DAB2/LPAR1/TGFB3/DOK5/NFATC4/SH3BGRL/GREM1/TIMP3/AR/HGF/IGFBP4/PRRX1/LURAP1/SH3RF3/PEA15/FGF7/RSPO3/DAAM2/ACVRL1/NRP1/CREBRF/ANGPT1/CNTNAP1/GLIPR2/PDE5A/DYNC2H1/ROR2/SRPX…	BP
cell projection organization	754/7182	1400/17910	1.87992e-27	3.62221e-25	2.70822e-25	754	ZEB2/S1PR1/NDN/CNTN4/JAM3/NR2F1/LAMA2/PTPRM/PKD2/PREX2/PMP22/BOC/SLIT2/CDH11/DLG4/DOK6/FLRT2/PRKD1/DENND5A/SDC2/SERPINF1/FZD4/ARSB/LPAR1/APBB1/TGFB3/MAP1A/SPART/LZTS1/DOK5/NFATC4/RHOQ/ARHGEF6/SLIT3/HGF/MEF2C/GLI3/PRRX1/WWTR1/ISLR2/FAT4/GLI2/PALM/CAMK1D/PRKG1/FEZ1/THY1/PARVA/RBFOX2/NRP1/DPYSL3/NAV3/ADARB1/KLF7/TUB/DZIP1/CNTNAP1/VIM/DYNC2H1/CC2D2A/FZD1/EPHA3/BCL2/MAGI2/TTBK2/HDGFL3/NLGN3/ROBO1/MAP1…	BP
positive regulation of signaling	908/7182	1736/17910	2.06388e-27	3.90688e-25	2.92106e-25	908	RECK/ZEB2/SEPTIN4/MAPK10/ADGRA2/TEK/MAP3K3/TIMP2/HIC1/IL6ST/GUCY1A1/EVC/LAMA2/DCN/RAMP3/PECAM1/PKD2/PDGFRB/AKT3/GLI1/TNFSF12/SELP/HTR2A/MAP3K12/DLG4/ENG/NPR2/C1QTNF2/MDFIC/CYP1B1/PRKD1/IL1R1/ZNF423/DACT1/NLGN2/PTGIS/FZD4/IGFBP5/SH2D3C/DAB2/LPAR1/TGFB3/DOK5/NFATC4/SH3BGRL/GREM1/TIMP3/AR/HGF/IGFBP4/PRRX1/LURAP1/SH3RF3/PEA15/FGF7/RSPO3/DAAM2/ACVRL1/NRP1/CREBRF/ANGPT1/CNTNAP1/GLIPR2/PDE5A/DYNC2H1/ROR…	BP
regulation of phosphorus metabolic process	879/7182	1673/17910	2.44756e-27	4.55331e-25	3.40438e-25	879	ZEB2/MAPK10/TEK/MAP3K3/TIMP2/IL6ST/HEG1/RAMP3/PECAM1/EMILIN1/PKD2/LDLRAD4/PDGFRB/KIRREL1/SLIT2/VEGFC/HTR2A/MAP3K12/DLG4/ENG/C1QTNF2/MDFIC/PRKD1/PLCL1/DDR2/DACT1/DLC1/FBLN1/FZD4/LDB2/DAB2/LPAR1/TGFB3/DOK5/GREM1/TIMP3/AR/HGF/MEF2C/IGFBP4/WWTR1/SH3RF3/CREBL2/PLPP3/PEA15/FAM20C/FGF7/ACVRL1/THY1/CLIP3/NRP1/TMEM119/ADARB1/RASIP1/ANGPT1/GLIPR2/PDE5A/PPM1F/ROR2/FZD1/NOTCH2/ADCY4/BCL2/MAGI2/IL34/ROBO1/THB…	BP
regulation of phosphate metabolic process	878/7182	1671/17910	2.57086e-27	4.70163e-25	3.51527e-25	878	ZEB2/MAPK10/TEK/MAP3K3/TIMP2/IL6ST/HEG1/RAMP3/PECAM1/EMILIN1/PKD2/LDLRAD4/PDGFRB/KIRREL1/SLIT2/VEGFC/HTR2A/MAP3K12/DLG4/ENG/C1QTNF2/MDFIC/PRKD1/PLCL1/DDR2/DACT1/DLC1/FBLN1/FZD4/LDB2/DAB2/LPAR1/TGFB3/DOK5/GREM1/TIMP3/AR/HGF/MEF2C/IGFBP4/WWTR1/SH3RF3/CREBL2/PLPP3/PEA15/FGF7/ACVRL1/THY1/CLIP3/NRP1/TMEM119/ADARB1/RASIP1/ANGPT1/GLIPR2/PDE5A/PPM1F/ROR2/FZD1/NOTCH2/ADCY4/BCL2/MAGI2/IL34/ROBO1/THBS4/CSF1…	BP
circulatory system development	626/7182	1128/17910	3.23544e-27	5.8184e-25	4.35025e-25	626	RECK/QKI/ADGRA2/TEK/S1PR1/MAP3K3/CLEC14A/MMRN2/JAM3/HEG1/DCN/COL8A1/CD34/ELN/BICC1/PECAM1/PTPRM/EMILIN1/PKD2/PDGFRB/LTBP1/AKT3/SLIT2/GLI1/TNFSF12/FBN1/COL8A2/VEGFC/TCF21/RHOJ/HEYL/DCHS1/ENG/POU6F1/RAMP2/PRICKLE1/FLRT2/LOXL1/CYP1B1/PRKD1/TIE1/EDNRA/ZFPM2/MEOX2/TBXA2R/DLC1/SERPINF1/PTGIS/FZD4/KCNJ8/ARHGEF15/CDH5/PLXDC1/NFATC4/GREM1/STAB1/ECSCR/SLIT3/HGF/MEF2C/GLI3/PRRX1/FAT4/GLI2/COL15A1/ANTXR1/RSP…	BP
macromolecule localization	1352/7182	2735/17910	4.33097e-27	7.66085e-25	5.72779e-25	1352	FBLN5/QKI/MAPK10/LRRC32/HEG1/CD34/RAMP3/RFTN2/PKD2/LTBP1/FBN1/ITPR1/VEGFC/HTR2A/DCHS1/DLG4/COPZ2/GPC6/RAMP2/PRICKLE1/MDFIC/SYNE1/CAVIN1/LTBP2/RAB31/CD200/NLGN2/SYT11/FZD4/DAB2/APBB1/TGFB3/MAP1A/EHD2/SSC5D/RHOQ/MCC/AR/GLIS2/GLI3/STOM/PALM/NRXN2/FGF7/STAT5B/SGCD/THY1/CLIP3/NRP1/SYNDIG1/CEP68/LEPROT/KLF7/ANGPT1/DZIP1/CNTNAP1/DYNC2H1/CC2D2A/MSN/PPM1F/RAB3IL1/ANK2/RILPL1/SLCO2A1/PKIG/TTC7B/EPHA3/BCL2/…	BP
small GTPase mediated signal transduction	300/7182	465/17910	4.78169e-27	8.32169e-25	6.22189e-25	300	A2M/SYDE1/ARHGAP31/TIMP2/HEG1/PECAM1/PREX2/PDGFRB/SLIT2/RHOJ/PRKD1/MRAS/STARD8/DLC1/ARHGEF17/SH2D3C/ARHGAP20/LPAR1/RASGRF2/ARHGEF15/CYTH3/RHOQ/RGL1/ARHGEF6/NRP1/RERG/KANK2/RASIP1/NOTCH2/FAM13B/ARHGEF25/ROBO1/ARHGAP22/FGD5/DOCK11/NISCH/F2R/FGF2/CDON/RIPOR1/MYO9A/ABL1/RASGRP4/ABCA1/ARHGAP15/SYNGAP1/ARHGEF40/IQSEC1/FGD1/ARHGAP10/CSF1/ARHGAP24/ELMO1/CGNL1/NGF/RHOB/WASF2/IGF1/COL1A2/COL3A1/RASA3/MAPRE…	BP
immune system process	1495/7182	3063/17910	4.88606e-27	8.36834e-25	6.25677e-25	1495	A2M/C1S/GYPC/C1R/MAPK10/TEK/S1PR1/TIMP2/LRRC32/IL6ST/JAM3/CD34/PECAM1/JAM2/EMILIN1/SLIT2/TNFSF12/FBN1/VEGFC/SELP/TCF21/SERPING1/PRKD1/IL1R1/SDC2/RAB31/CRISPLD2/CD200/ARSB/KCNJ8/CYSLTR1/PLEKHO2/TGFB3/COLEC12/SSC5D/GREM1/MEOX1/ABCC9/MEF2C/GLI3/ZEB1/STOM/GLI2/CAMK1D/FLI1/FAM20C/C1RL/STAT5B/RORA/CD93/THY1/LEPR/C4A/RBFOX2/CYP7B1/EML1/MFAP5/GAB3/ADARB1/MAFB/ATP1B2/GEM/ANGPT1/PDE5A/VIM/MSN/ROR2/CTSK/CH2…	BP
actin filament-based process	399/7182	661/17910	8.29259e-27	1.39808e-24	1.0453e-24	399	TEK/S1PR1/JAM3/ELN/PDGFRB/KIRREL1/SLIT2/SCN4B/RHOJ/MRAS/KCNE4/DLC1/ARHGEF17/KCNJ8/LPAR1/TGFB3/ARHGEF15/EHD2/RHOQ/MEF2C/LURAP1/PRKG1/ANTXR1/FGF7/DAAM2/SGCD/FMNL3/PARVA/NRP1/DPYSL3/VIM/PPM1F/ANK2/NOTCH2/CNN3/EPHA3/BCL2/CSF1R/MYH10/CXCL12/SHANK3/MYADM/FGD5/PDGFRA/CCN2/ADD1/GJA5/SCN2B/GSN/TLN1/LRP1/NISCH/FCHSD2/SH3PXD2B/GAB1/SUN2/TNXB/JMY/MEF2A/WIPF1/SCN1B/TGFB1/PDLIM3/EVL/SFRP1/PHLDB2/GJC1/TMOD2/PIP…	BP
nervous system development	1121/7182	2216/17910	9.41408e-27	1.56274e-24	1.16841e-24	1121	ZEB2/QKI/SEPTIN4/ADGRA2/S1PR1/TCF4/NDN/ZNF521/TIMP2/CNTN4/IL6ST/JAM3/NR2F1/LAMA2/BHLHE22/PTPRM/PKD2/PREX2/GNB4/PMP22/BOC/AKT3/SLIT2/GLI1/CDH11/VEGFC/HEYL/DCHS1/DLG4/ENG/POU6F1/DOK6/BEND6/PRICKLE1/FLRT2/PRKD1/DENND5A/EDNRA/ZNF423/DACT1/DLC1/SDC2/NLGN2/SERPINF1/PCDH18/FZD4/ARSB/LPAR1/APBB1/DHH/ARHGEF15/SPART/LZTS1/DOK5/PLXDC1/NFATC4/PCDHB4/SLIT3/HGF/MEF2C/GLI3/ZEB1/PRRX1/ISLR2/FAT4/GLI2/PALM/NRXN2/…	BP
regulation of organelle organization	633/7182	1147/17910	1.18233e-26	1.93293e-24	1.44519e-24	633	ZEB2/SYDE1/TEK/S1PR1/PHLDB1/JAM3/DCN/ELN/PDGFRB/KIRREL1/SLIT2/PRKD1/DLC1/SYT11/LPAR1/TGFB3/ARHGEF15/RHOQ/EID1/HGF/MEF2C/CLIC4/FEZ1/CLIP3/NRP1/NAV3/LEPROT/DZIP1/AFAP1/MSN/PPM1F/NOTCH2/EPHA3/BCL2/TTBK2/HDGFL3/SKI/MAP1B/CSF1R/CXCL12/SHANK3/PIP4K2A/MYADM/PDGFRA/CCN2/ADD1/GSN/LRP1/BMERB1/FCHSD2/SH3PXD2B/JMY/PKD1/TGFB1/EVL/NAP1L2/SFRP1/PHLDB2/ANKRD53/TMOD2/PRKN/PIK3R1/ABL1/PDE3A/TMOD1/FYCO1/PHF1/FAM107…	BP
positive regulation of cell communication	902/7182	1730/17910	1.24071e-26	1.9981e-24	1.49392e-24	902	RECK/ZEB2/SEPTIN4/MAPK10/ADGRA2/TEK/MAP3K3/TIMP2/HIC1/IL6ST/GUCY1A1/EVC/LAMA2/DCN/RAMP3/PECAM1/PKD2/PDGFRB/AKT3/GLI1/TNFSF12/SELP/HTR2A/MAP3K12/DLG4/ENG/NPR2/C1QTNF2/MDFIC/CYP1B1/PRKD1/IL1R1/ZNF423/DACT1/NLGN2/PTGIS/FZD4/IGFBP5/SH2D3C/DAB2/LPAR1/TGFB3/DOK5/NFATC4/SH3BGRL/GREM1/TIMP3/AR/HGF/IGFBP4/PRRX1/LURAP1/SH3RF3/PEA15/FGF7/RSPO3/DAAM2/ACVRL1/NRP1/CREBRF/ANGPT1/CNTNAP1/GLIPR2/PDE5A/DYNC2H1/ROR…	BP
tube development	607/7182	1093/17910	1.68998e-26	2.6816e-24	2.00495e-24	607	RECK/ZEB2/QKI/ADGRA2/TEK/S1PR1/MAP3K3/CLEC14A/MMRN2/JAM3/HEG1/DCN/COL8A1/CD34/PECAM1/PTPRM/EMILIN1/PKD2/PDGFRB/AKT3/SLIT2/GLI1/TNFSF12/COL8A2/TCF21/RHOJ/HEYL/DCHS1/ENG/RAMP2/PRICKLE1/CYP1B1/PRKD1/TIE1/EDNRA/ZFPM2/MEOX2/DACT1/TBXA2R/DLC1/CRISPLD2/SERPINF1/PTGIS/FZD4/IGFBP5/TGFB3/CDH5/PLXDC1/NFATC4/GREM1/STAB1/AR/ECSCR/HGF/MEF2C/GLI3/ZEB1/PRRX1/WWTR1/FAT4/GLI2/COL15A1/FGF7/RSPO3/CLIC4/SGCD/RORA/ACV…	BP
positive regulation of cellular component organization	652/7182	1189/17910	1.89357e-26	2.9611e-24	2.21393e-24	652	ZEB2/TEK/PHLDB1/DCN/EMILIN1/PDGFRB/KIRREL1/SLIT2/DLG4/FLRT2/PRKD1/DDR2/RAB31/NLGN2/SERPINF1/FZD4/ARSB/DAB2/LPAR1/APBB1/TGFB3/ARHGEF15/EHD2/GREM1/RHOQ/AR/HGF/ISLR2/PALM/CAMK1D/FEZ1/THY1/CLIP3/C4A/NRP1/SYNDIG1/DPYSL3/NAV3/LEPROT/TUB/RASIP1/MFGE8/ANGPT1/DZIP1/MSN/PPM1F/FZD1/EPHA3/BCL2/MAGI2/NLGN3/ROBO1/MAP1B/CXCL12/SHANK3/TRABD2B/BMPR2/PIP4K2A/MYADM/NEGR1/SGIP1/CCN2/ADD1/GSN/DOCK11/LRP1/FCHSD2/SH3PX…	BP
positive regulation of protein modification process	617/7182	1117/17910	4.05891e-26	6.25652e-24	4.67782e-24	617	ZEB2/SEPTIN4/MAPK10/TEK/MAP3K3/TIMP2/IL6ST/RAMP3/PECAM1/PKD2/PDGFRB/RNF180/VEGFC/HTR2A/MAP3K12/DLG4/ENG/C1QTNF2/PRICKLE1/MDFIC/PRKD1/DDR2/DLC1/FZD4/DAB2/LPAR1/TGFB3/DOK5/GREM1/AR/HGF/IGFBP4/SH3RF3/CREBL2/PEA15/FGF7/ACVRL1/CLIP3/NRP1/TMEM119/ANGPT1/GLIPR2/PDE5A/ROR2/FZD1/NOTCH2/ADCY4/BCL2/MAGI2/IL34/ROBO1/THBS4/CSF1R/APLNR/TRABD2B/BMPR2/NRK/TGFBR2/PDGFRA/NOD1/CCN2/ADCY9/GNAI2/PJA2/FLT4/GPR183/GHR/…	BP
cell development	1008/7182	1971/17910	5.3207e-26	8.08597e-24	6.04564e-24	1008	RECK/ZEB2/QKI/SEPTIN4/ADGRA2/TEK/TCF4/NDN/TIMP2/CNTN4/IL6ST/JAM3/NR2F1/LAMA2/HEG1/PECAM1/PTPRM/PREX2/PMP22/BOC/PDGFRB/SLIT2/FBN1/CDH11/VEGFC/HEYL/DLG4/ENG/NPR2/DOK6/RAMP2/BEND6/FLRT2/PRKD1/DENND5A/EDNRA/SDC2/FBLN1/SERPINF1/FZD4/ARSB/S1PR3/LPAR1/APBB1/DHH/SPART/LZTS1/CDH5/DOK5/FAM172A/NFATC4/MAF/AR/SLIT3/HGF/MEF2C/GLI3/ZEB1/PRRX1/ISLR2/FAT4/GLI2/CAMK1D/PRKG1/FLI1/FAM20C/ANTXR1/CLIC4/FEZ1/DAAM2/SGC…	BP
response to stress	1816/7182	3822/17910	6.19078e-26	9.27757e-24	6.93657e-24	1816	FBLN5/A2M/ZEB2/IGFBP7/FSTL1/C1S/RBMS3/C1R/MAPK10/TEK/MAP3K3/HIC1/GUCY1B1/IL6ST/JAM3/DCN/CD34/PECAM1/ENTPD1/PKD2/PDGFRB/AKT3/GLI1/ITPR1/SELP/MAP3K12/SERPING1/CPQ/RAMP2/MDFIC/CYP1B1/PRKD1/EDNRA/ZFPM2/IL1R1/DACT1/TBXA2R/CD200/CLEC1A/SYT11/FOXN3/FBLN1/SERPINF1/PTGIS/FZD4/KCNJ8/SH2D3C/S1PR3/ZBTB4/CYSLTR1/APBB1/RASGRF2/TGFB3/COLEC12/EHD2/CDH5/ACKR1/NFATC4/SSC5D/SOD3/CYGB/STAB1/ARHGEF6/ABCC9/HGF/MEF2C/G…	BP
vesicle-mediated transport	975/7182	1899/17910	7.41175e-26	1.09552e-23	8.19087e-24	975	A2M/MAPK10/TIMP2/RAMP3/PECAM1/VEGFC/SELP/HTR2A/SERPING1/DLG4/COPZ2/RAMP2/PRKD1/DENND5A/ISLR/CD302/RAB31/CRISPLD2/SYT11/ARSB/DAB2/PLEKHO2/TGFB3/COLEC12/EHD2/BACE1/SSC5D/CYTH3/GREM1/MARCHF2/STAB1/TIMP3/HGF/STOM/CAMK1D/MRC2/GPRASP1/CD93/LEPR/CLIP3/C4A/NRP1/PEAR1/F8/SCARA3/TUB/MFGE8/ANGPT1/MSN/SRPX/ANK2/EPHA3/FOXF1/CYB5R3/MAGI2/VWF/STING1/NLGN3/STON1/HSPG2/ATP8B4/MYH10/NCALD/SPARC/TGFBR2/NEURL1B/SGIP…	BP
locomotion	946/7182	1835/17910	8.08859e-26	1.1794e-23	8.81806e-24	946	RECK/ZEB2/PLPP1/GYPC/SYDE1/ADGRA2/TEK/S1PR1/MAP3K3/NDN/CLEC14A/PODN/MMRN2/CNTN4/JAM3/LAMA2/DCN/CD34/PECAM1/PTPRM/JAM2/EMILIN1/LDLRAD4/BOC/PDGFRB/AKT3/SLIT2/TNFSF12/VEGFC/SELP/RHOJ/DCHS1/ENG/LAMA4/DOK6/GPC6/FLRT2/CYP1B1/PRKD1/TIE1/IL1R1/CAVIN1/MEOX2/DDR2/TBXA2R/DLC1/SDC2/CD200/FBLN1/SERPINF1/FZD4/LDB2/ARSB/IGFBP5/DAB2/LPAR1/CYSLTR1/DOK5/GREM1/CYGB/MCC/ECSCR/SLIT3/HGF/MEF2C/GLI3/GLI2/LURAP1/PLPP3/C…	BP
neurogenesis	790/7182	1492/17910	8.22645e-26	1.18351e-23	8.84877e-24	790	ZEB2/S1PR1/TCF4/NDN/ZNF521/TIMP2/CNTN4/IL6ST/JAM3/NR2F1/LAMA2/BHLHE22/PTPRM/PREX2/PMP22/BOC/SLIT2/CDH11/VEGFC/HEYL/DCHS1/DLG4/DOK6/BEND6/FLRT2/PRKD1/DENND5A/SDC2/SERPINF1/FZD4/ARSB/LPAR1/APBB1/SPART/LZTS1/DOK5/NFATC4/SLIT3/HGF/MEF2C/GLI3/ZEB1/PRRX1/ISLR2/FAT4/GLI2/CAMK1D/PRKG1/FEZ1/DAAM2/RORA/LHX6/THY1/LEPR/RBFOX2/NRP1/EML1/TENM4/DPYSL3/NAV3/MXRA8/ADARB1/KLF7/CNTNAP1/VIM/DYNC2H1/ROR2/FZD1/EPHA3/B…	BP
actin cytoskeleton organization	345/7182	559/17910	1.02429e-25	1.45422e-23	1.08728e-23	345	TEK/S1PR1/JAM3/ELN/PDGFRB/KIRREL1/SLIT2/RHOJ/MRAS/DLC1/ARHGEF17/LPAR1/TGFB3/ARHGEF15/EHD2/RHOQ/MEF2C/LURAP1/PRKG1/ANTXR1/FGF7/DAAM2/FMNL3/NRP1/DPYSL3/PPM1F/NOTCH2/CNN3/EPHA3/BCL2/CSF1R/MYH10/CXCL12/SHANK3/MYADM/FGD5/PDGFRA/CCN2/ADD1/GSN/TLN1/LRP1/NISCH/FCHSD2/SH3PXD2B/GAB1/TNXB/JMY/MEF2A/WIPF1/TGFB1/PDLIM3/EVL/SFRP1/PHLDB2/TMOD2/PIP5K1C/SHROOM4/PRKN/PIK3R1/ABL1/TMOD1/CAVIN3/FAM107A/DIXDC1/FGD1/EL…	BP
movement of cell or subcellular component	1025/7182	2012/17910	1.065e-25	1.49239e-23	1.11581e-23	1025	RECK/ZEB2/PLPP1/GYPC/SYDE1/ADGRA2/TEK/S1PR1/MAP3K3/NDN/CLEC14A/PODN/MMRN2/CNTN4/JAM3/LAMA2/DCN/CD34/PECAM1/PTPRM/JAM2/EMILIN1/LDLRAD4/BOC/PDGFRB/AKT3/SLIT2/SCN4B/TNFSF12/VEGFC/SELP/RHOJ/DCHS1/ENG/LAMA4/DOK6/GPC6/FLRT2/CYP1B1/PRKD1/TIE1/KCNE4/IL1R1/CAVIN1/MEOX2/DDR2/TBXA2R/DLC1/SDC2/CD200/FBLN1/SERPINF1/LDB2/ARSB/IGFBP5/KCNJ8/DAB2/LPAR1/MAP1A/DOK5/GREM1/CYGB/MCC/SLIT3/HGF/MEF2C/GLI3/GLI2/LURAP1/PL…	BP
positive regulation of developmental process	736/7182	1378/17910	2.03375e-25	2.81336e-23	2.10347e-23	736	ZEB2/SYDE1/TEK/TCF4/MAP3K3/PHLDB1/TIMP2/IL6ST/DCN/CD34/BOC/PDGFRB/AKT3/SLIT2/GLI1/TNFSF12/VEGFC/HTR2A/RHOJ/HEYL/DLG4/ENG/RAMP2/BEND6/FLRT2/CYP1B1/PRKD1/ZFPM2/DDR2/TBXA2R/NLGN2/SERPINF1/PTGIS/FZD4/ARSB/DAB2/LPAR1/APBB1/TGFB3/EHD2/CDH5/GREM1/AR/HGF/MEF2C/GLI3/ZEB1/WWTR1/ISLR2/GLI2/CREBL2/CAMK1D/FAM20C/FGF7/STAT5B/FEZ1/ACVRL1/FRZB/NRP1/TENM4/SYNDIG1/DPYSL3/TMEM119/GLIPR2/PDE5A/ROR2/FZD1/EPHA3/LTBP3/…	BP
positive regulation of protein metabolic process	814/7182	1548/17910	2.0714e-25	2.82917e-23	2.11528e-23	814	ZEB2/RBMS3/SEPTIN4/MAPK10/TEK/MAP3K3/TIMP2/IL6ST/RAMP3/PECAM1/PKD2/PDGFRB/RNF180/TNFSF12/VEGFC/HTR2A/MAP3K12/DLG4/ENG/C1QTNF2/PRICKLE1/MDFIC/PRKD1/DDR2/DACT1/DLC1/SPON1/FBLN1/FZD4/DAB2/LPAR1/TGFB3/DOK5/GREM1/AR/ECSCR/HGF/IGFBP4/SH3RF3/CREBL2/PEA15/ANTXR1/FGF7/STAT5B/ACVRL1/CLIP3/NRP1/TMEM119/PCOLCE/ANGPT1/GLIPR2/PDE5A/VIM/MSN/PPM1F/ROR2/FZD1/NOTCH2/ADCY4/BCL2/MAGI2/IL34/ROBO1/THBS4/CSF1R/SOX17/AP…	BP
apoptotic process	976/7182	1907/17910	2.79136e-25	3.76485e-23	2.81487e-23	976	PDE1A/SEPTIN4/TEK/HIC1/NR3C1/IL6ST/MAGEH1/PDGFRB/SLIT2/TNFSF12/ITPR1/MAP3K12/GIMAP8/RAMP2/CYP1B1/PRKD1/DLC1/ARHGEF17/PTGIS/DAB2/LPAR1/APBB1/RASGRF2/TGFB3/BACE1/NFATC4/GREM1/ARHGEF6/TIMP3/AR/ECSCR/SLIT3/HGF/MEF2C/GLI3/GLI2/PTGFR/CAMK1D/PEA15/STAT5B/CLIP3/FRZB/RPS6KA2/NRP1/CALHM2/ADARB1/KANK2/RNF130/ANGPT1/PPM1F/SRPX/NOTCH2/BCL2/STING1/ROBO1/CSF1R/CXCL12/TWIST2/BMPR2/TGFBR2/NOD1/CCN2/GNAI2/PRMT2/FL…	BP
cellular response to stress	979/7182	1914/17910	3.00201e-25	3.99897e-23	2.98991e-23	979	FBLN5/ZEB2/MAPK10/MAP3K3/HIC1/GUCY1B1/JAM3/CD34/PKD2/AKT3/ITPR1/MAP3K12/MDFIC/CYP1B1/PRKD1/DACT1/FOXN3/PTGIS/FZD4/SH2D3C/ZBTB4/APBB1/RASGRF2/NFATC4/SOD3/ARHGEF6/HGF/MEF2C/PRRX1/SH3RF3/PEA15/LRRC8C/RORA/THY1/CREBRF/ROR2/SRPX/FZD1/SESN3/BCL2/VASH1/THBS4/MAP1B/CXCL12/BMPR2/NRK/PDGFRA/NOD1/CCN2/USP51/ADD1/EPAS1/PJA2/FLT4/LAMB2/FTO/TLN1/LRP1/FYN/NUAK1/UBE2E2/JMY/GDF6/FGF1/DYSF/CTDSP2/MARF1/RIPOR1/RGMA…	BP
regulation of localization	1321/7182	2688/17910	4.42601e-25	5.82399e-23	4.35443e-23	1321	RECK/SYDE1/ADGRA2/TEK/S1PR1/MAP3K3/CLIC2/PODN/MMRN2/LRRC32/JAM3/LAMA2/DCN/CD34/RAMP3/PECAM1/PTPRM/EMILIN1/PKD2/LDLRAD4/PDGFRB/AKT3/SLIT2/SCN4B/ITPR1/VEGFC/SELP/HTR2A/RHOJ/DLG4/ENG/LAMA4/C1QTNF2/GPC6/FLRT2/MDFIC/CYP1B1/PRKD1/TIE1/EDNRA/IL1R1/CAVIN1/MEOX2/DDR2/TBXA2R/DLC1/RAB31/CD200/NLGN2/SYT11/FBLN1/SERPINF1/LDB2/ARSB/IGFBP5/KCNJ8/DAB2/REM1/LPAR1/APBB1/KCND1/TGFB3/MAP1A/EHD2/BACE1/SSC5D/GREM1/RHO…	BP
cell activation	718/7182	1342/17910	4.59456e-25	5.97293e-23	4.46579e-23	718	TIMP2/LRRC32/IL6ST/PECAM1/EMILIN1/PDGFRB/ITPR1/SELP/RAB31/CRISPLD2/CD200/ARSB/PLEKHO2/CYGB/MEF2C/GLI3/ZEB1/STOM/GLI2/PRKG1/STAT5B/RORA/CD93/THY1/LEPR/PEAR1/F8/MAFB/PDE5A/MSN/NOTCH2/FOXF1/CYB5R3/BCL2/VWF/STING1/ATP8B4/TGFBR2/PDGFRA/PTPRB/CCN2/PJA2/GSN/GPR183/TLN1/DOCK11/LRP1/PRKCH/FYN/CD81/F2R/SMO/ADGRF5/HLX/TGFB1/TWSG1/DYSF/AP1M1/SFRP1/VPS35L/LOXL3/SH2B3/SOCS5/PIK3R1/ABL1/PRCP/GAS6/PURA/THBD/YPEL…	BP
regulation of cell adhesion	393/7182	659/17910	5.64299e-25	7.24855e-23	5.41953e-23	393	TEK/S1PR1/LRRC32/IL6ST/LAMA2/COL8A1/JAM2/CCDC80/LAMA4/CYP1B1/DLC1/FBLN1/FZD4/CYTH3/GREM1/GLI3/GLI2/NID1/ABI3BP/PLPP3/PRKG1/STAT5B/ACVRL1/THY1/NRP1/ANGPT1/PDE5A/PPM1F/EPHA3/FOXF1/BCL2/CXCL12/MYADM/TGFBR2/PEAK1/GSN/LRP1/FYN/NUAK1/CD81/HLX/PKD1/SMOC2/ADAM19/TGFB1/TWSG1/DYSF/MDGA1/SFRP1/PHLDB2/LOXL3/SH2B3/SOCS5/PIK3R1/ABL1/SFRP2/ETS1/THBS1/FAM107A/DUSP26/UTRN/FCGR2B/CCL2/CSF1/MACF1/ILK/DUSP3/ZMIZ1/AP…	BP
regulation of biological quality	1741/7182	3661/17910	6.62503e-25	8.40989e-23	6.28783e-23	1741	A2M/CYBRD1/MAPK10/TEK/S1PR1/NDN/CLIC2/SYNPO/PLSCR4/CNTN4/JAM3/GUCY1A1/TNS2/HEG1/DCN/CD34/RAMP3/ELN/ENTPD1/PTPRM/PKD2/LTBP1/AKT3/KIRREL1/SLIT2/SCN4B/FBN1/ITPR1/VEGFC/SELP/HTR2A/SERPING1/CPQ/DLG4/TXNDC15/NPR2/LAMA4/GPC6/RAMP2/FLRT2/CYP1B1/PRKD1/RGS7BP/EDNRA/KCNE4/ZFPM2/SYNE1/PLCL1/ZNF423/CRTAP/DACT1/TBXA2R/DLC1/NLGN2/SYT11/FBLN1/SERPINF1/PTGIS/FZD4/LDB2/IGFBP5/KCNJ8/S1PR3/LPAR1/CYSLTR1/ARHGEF15/MAP…	BP
tube morphogenesis	512/7182	905/17910	8.20926e-25	1.02998e-22	7.70083e-23	512	RECK/ZEB2/QKI/ADGRA2/TEK/S1PR1/MAP3K3/CLEC14A/MMRN2/JAM3/HEG1/DCN/COL8A1/CD34/PECAM1/PTPRM/EMILIN1/PKD2/PDGFRB/AKT3/SLIT2/GLI1/TNFSF12/COL8A2/TCF21/RHOJ/DCHS1/ENG/RAMP2/PRICKLE1/CYP1B1/PRKD1/TIE1/EDNRA/ZFPM2/MEOX2/DACT1/TBXA2R/DLC1/SERPINF1/PTGIS/FZD4/CDH5/PLXDC1/NFATC4/GREM1/STAB1/AR/ECSCR/HGF/MEF2C/GLI3/ZEB1/PRRX1/FAT4/GLI2/COL15A1/RSPO3/CLIC4/SGCD/RORA/ACVRL1/FMNL3/THY1/LEPR/PARVA/NRP1/MCAM/EL…	BP
neuron projection development	499/7182	879/17910	1.21377e-24	1.50536e-22	1.12551e-22	499	ZEB2/NDN/CNTN4/JAM3/NR2F1/LAMA2/PTPRM/PREX2/PMP22/BOC/SLIT2/CDH11/DLG4/DOK6/FLRT2/PRKD1/DENND5A/SDC2/SERPINF1/FZD4/ARSB/LPAR1/APBB1/SPART/LZTS1/DOK5/NFATC4/SLIT3/HGF/MEF2C/GLI3/PRRX1/ISLR2/FAT4/GLI2/CAMK1D/PRKG1/FEZ1/THY1/RBFOX2/NRP1/DPYSL3/ADARB1/KLF7/CNTNAP1/VIM/FZD1/EPHA3/BCL2/MAGI2/HDGFL3/NLGN3/ROBO1/MAP1B/CSF1R/MYH10/CXCL12/SHANK3/BMPR2/NEGR1/MAP6/LAMB2/LRP1/NUMBL/GNAO1/GAB1/FYN/MEF2A/SCN1B/…	BP
positive regulation of cellular protein metabolic process	769/7182	1458/17910	1.77344e-24	2.17448e-22	1.6258e-22	769	ZEB2/RBMS3/SEPTIN4/MAPK10/TEK/MAP3K3/TIMP2/IL6ST/RAMP3/PECAM1/PKD2/PDGFRB/RNF180/VEGFC/HTR2A/MAP3K12/DLG4/ENG/C1QTNF2/PRICKLE1/MDFIC/PRKD1/DDR2/DACT1/DLC1/SPON1/FBLN1/FZD4/DAB2/LPAR1/TGFB3/DOK5/GREM1/AR/ECSCR/HGF/IGFBP4/SH3RF3/CREBL2/PEA15/ANTXR1/FGF7/ACVRL1/CLIP3/NRP1/TMEM119/PCOLCE/ANGPT1/GLIPR2/PDE5A/VIM/MSN/PPM1F/ROR2/FZD1/NOTCH2/ADCY4/BCL2/MAGI2/IL34/ROBO1/THBS4/CSF1R/APLNR/TRABD2B/BMPR2/NRK…	BP
generation of neurons	741/7182	1398/17910	2.32934e-24	2.82399e-22	2.11142e-22	741	ZEB2/S1PR1/TCF4/NDN/ZNF521/TIMP2/CNTN4/IL6ST/JAM3/NR2F1/LAMA2/PTPRM/PREX2/PMP22/BOC/SLIT2/CDH11/VEGFC/HEYL/DLG4/DOK6/BEND6/FLRT2/PRKD1/DENND5A/SDC2/SERPINF1/FZD4/ARSB/LPAR1/APBB1/SPART/LZTS1/DOK5/NFATC4/SLIT3/HGF/MEF2C/GLI3/ZEB1/PRRX1/ISLR2/FAT4/GLI2/CAMK1D/PRKG1/FEZ1/DAAM2/RORA/LHX6/THY1/RBFOX2/NRP1/EML1/TENM4/DPYSL3/ADARB1/KLF7/CNTNAP1/VIM/DYNC2H1/FZD1/EPHA3/BCL2/MAGI2/IL34/HDGFL3/PBX1/NLGN3/RO…	BP
response to endogenous stimulus	815/7182	1560/17910	2.43043e-24	2.91381e-22	2.17857e-22	815	IGFBP7/FSTL1/PLPP1/TEK/NR3C1/LRRC32/NR2F1/RAMP3/EMILIN1/PKD2/LDLRAD4/PDGFRB/LTBP1/SLIT2/FBN1/TCF21/FIBIN/HEYL/ENG/RAMP2/FLRT2/ZNF423/TBXA2R/LTBP2/RAB31/SERPINF1/IGFBP5/DAB2/DHH/TGFB3/CDH5/BACE1/GREM1/RHOQ/AR/SLIT3/MEF2C/ZEB1/GLP2R/FAT4/PTGFR/FAM20C/FGF7/ZNF366/STAT5B/RORA/ACVRL1/LEPR/RBFOX2/CYP7B1/DKK3/RERG/PDE2A/LEPROT/KANK2/CREBRF/ASPN/TUB/VIM/COL4A2/MSN/ROR2/FZD1/CALCOCO1/ADCY4/KLF9/SESN3/BCL2…	BP
regulation of cell proliferation	862/7182	1664/17910	2.73499e-24	3.24292e-22	2.42464e-22	862	PDE1A/IGFBP7/PLPP1/TEK/S1PR1/MAP3K3/NDN/PODN/TIMP2/LRRC32/IL6ST/TNS2/ELN/PTPRM/PKD2/PTGIR/PMP22/PDGFRB/AKT3/GLI1/TNFSF12/VEGFC/HTR2A/CYP1B1/PRKD1/ZFPM2/DDR2/DLC1/CD200/FBLN1/SERPINF1/IGFBP5/S1PR3/TGFB3/CDH5/GREM1/MCC/AR/SLIT3/MEF2C/GLI3/ZEB1/PRRX1/WWTR1/GLP2R/GLI2/PTGFR/PRKG1/FGF7/STAT5B/OGN/ACVRL1/FRZB/RPS6KA2/RBFOX2/NRP1/CYP7B1/TMEM119/RERG/ADARB1/CLEC11A/KANK2/ANGPT1/PDE5A/ROR2/SRPX/P3H3/NOTCH…	BP
cell cycle	885/7182	1716/17910	3.58427e-24	4.20372e-22	3.143e-22	885	FBXL7/TTC28/GAS7/TIMP2/NR3C1/PKD2/PDGFRB/GLI1/NPR2/DACT1/MARVELD1/FOXN3/HMCN1/APBB1/LZTS1/EID1/HGF/CREBL2/PEA15/STAT5B/RPS6KA2/EML1/CEP68/ADARB1/KANK2/GEM/NOTCH2/BCL2/MAGI2/VASH1/PBX1/TUBA1A/MYH10/CCN2/USP51/STARD9/GNAI2/PRMT2/SMARCD3/PARD3B/PHC1/SUN2/UBE2E2/JMY/LATS2/PKD1/TXNIP/ADAMTS1/SMOC2/TGFB1/NR2F2/CTDSP2/MARF1/SPRY1/SFRP1/ANKRD53/TACC1/CCDC69/ABL1/PDE3A/GAS6/SNX18/THBS1/KLF11/GAS1/FAM107A/…	BP
cardiovascular system development	455/7182	792/17910	5.73724e-24	6.65643e-22	4.97682e-22	455	RECK/QKI/ADGRA2/TEK/S1PR1/MAP3K3/CLEC14A/MMRN2/JAM3/HEG1/DCN/COL8A1/CD34/PECAM1/PTPRM/EMILIN1/PKD2/PDGFRB/LTBP1/AKT3/SLIT2/TNFSF12/COL8A2/VEGFC/TCF21/RHOJ/ENG/RAMP2/PRICKLE1/LOXL1/CYP1B1/PRKD1/TIE1/EDNRA/ZFPM2/MEOX2/TBXA2R/SERPINF1/PTGIS/FZD4/ARHGEF15/CDH5/PLXDC1/NFATC4/GREM1/STAB1/ECSCR/HGF/MEF2C/GLI3/PRRX1/COL15A1/ANTXR1/RSPO3/CLIC4/GJA4/SGCD/RORA/ACVRL1/FMNL3/THY1/LEPR/PARVA/NRP1/MCAM/ELK3/PDE…	BP
vasculature development	451/7182	784/17910	6.33533e-24	7.27215e-22	5.43718e-22	451	RECK/QKI/ADGRA2/TEK/S1PR1/MAP3K3/CLEC14A/MMRN2/JAM3/HEG1/DCN/COL8A1/CD34/PECAM1/PTPRM/EMILIN1/PKD2/PDGFRB/LTBP1/AKT3/SLIT2/TNFSF12/COL8A2/VEGFC/TCF21/RHOJ/ENG/RAMP2/PRICKLE1/LOXL1/CYP1B1/PRKD1/TIE1/EDNRA/ZFPM2/MEOX2/TBXA2R/SERPINF1/PTGIS/FZD4/ARHGEF15/CDH5/PLXDC1/NFATC4/GREM1/STAB1/ECSCR/HGF/MEF2C/GLI3/PRRX1/COL15A1/ANTXR1/RSPO3/CLIC4/GJA4/SGCD/RORA/ACVRL1/FMNL3/THY1/LEPR/PARVA/NRP1/MCAM/ELK3/PDE…	BP
cellular component assembly	1348/7182	2765/17910	7.6063e-24	8.63915e-22	6.45924e-22	1348	FBLN5/FBXL7/EFEMP2/NAP1L3/SEPTIN4/TEK/S1PR1/TCF4/PHLDB1/HEG1/CD34/ELN/EMILIN1/PKD2/PMP22/LDLRAD4/PDGFRB/KIRREL1/SLIT2/SELP/MFAP4/DLG4/C1QTNF2/RAMP2/FLRT2/DACT1/DLC1/NLGN2/SYT11/KCTD12/LPAR1/KCTD10/COL6A2/KCND1/TGFB3/ARHGEF15/COLEC12/CDH5/GREM1/RHOQ/ARHGEF6/MAP7D3/PCDHB4/AR/MEF2C/STOM/WWTR1/TSPAN4/PALM/NRXN2/ANXA6/ANTXR1/CELF2/LRRC8C/FEZ1/GJA4/ACVRL1/THY1/CLIP3/PARVA/NRP1/TENM4/SYNDIG1/DPYSL3/F8/N…	BP
anatomical structure formation involved in morphogenesis	612/7182	1124/17910	8.19401e-24	9.20972e-22	6.88584e-22	612	RECK/ZEB2/ADGRA2/TEK/S1PR1/MAP3K3/PHLDB1/CLEC14A/MMRN2/JAM3/DCN/COL8A1/CD34/PECAM1/PTPRM/EMILIN1/PDGFRB/AKT3/SLIT2/TNFSF12/COL8A2/VEGFC/TCF21/RHOJ/HEYL/DCHS1/ENG/RAMP2/PRICKLE1/CYP1B1/PRKD1/TIE1/EDNRA/MEOX2/TBXA2R/DLC1/SERPINF1/PTGIS/THBS3/EHD2/CDH5/PLXDC1/NFATC4/GREM1/STAB1/MEOX1/AR/ECSCR/HGF/MEF2C/GLI3/GLI2/COL15A1/FAM20C/RSPO3/RORA/ACVRL1/FMNL3/THY1/LEPR/PARVA/NRP1/TENM4/MCAM/ELK3/MAFB/RASIP1/…	BP
positive regulation of multicellular organismal process	898/7182	1750/17910	1.18852e-23	1.32207e-21	9.88473e-22	898	ZEB2/SYDE1/ADGRA2/TEK/TCF4/MAP3K3/PHLDB1/TIMP2/IL6ST/HEG1/CD34/PDGFRB/AKT3/SLIT2/GLI1/TNFSF12/VEGFC/SELP/HTR2A/RHOJ/HEYL/DLG4/ENG/LUM/RAMP2/BEND6/FLRT2/CYP1B1/PRKD1/ZFPM2/IL1R1/DDR2/TBXA2R/CD200/NLGN2/SERPINF1/PTGIS/FZD4/ARSB/DAB2/LPAR1/APBB1/TGFB3/CDH5/NFATC4/GREM1/AR/HGF/MEF2C/GLI3/ZEB1/WWTR1/ISLR2/GLI2/LURAP1/PLPP3/CAMK1D/FAM20C/FGF7/STAT5B/FEZ1/RORA/ACVRL1/LEPR/NRP1/TENM4/SYNDIG1/DPYSL3/TMEM1…	BP
cellular macromolecule localization	807/7182	1550/17910	1.56309e-23	1.721e-21	1.28674e-21	807	FBLN5/MAPK10/RAMP3/HTR2A/DCHS1/DLG4/COPZ2/GPC6/RAMP2/PRICKLE1/MDFIC/SYNE1/LTBP2/RAB31/NLGN2/SYT11/DAB2/MAP1A/EHD2/RHOQ/AR/GLIS2/GLI3/STOM/PALM/NRXN2/FGF7/SGCD/THY1/CLIP3/NRP1/SYNDIG1/CEP68/LEPROT/ANGPT1/DZIP1/CNTNAP1/DYNC2H1/CC2D2A/MSN/PPM1F/ANK2/RILPL1/PKIG/TTC7B/EPHA3/BCL2/MAGI2/TTBK2/FERMT2/SHANK3/MYADM/NEURL1B/MID2/GSN/TLN1/LRP1/PRKCH/DCLK2/SH3PXD2B/FYN/SUN2/TOR1AIP1/CD81/SMO/GLRB/ARL2BP/PKD1…	BP
cellular component biogenesis	1427/7182	2951/17910	1.64142e-23	1.78898e-21	1.33757e-21	1427	FBLN5/FBXL7/EFEMP2/NAP1L3/SEPTIN4/TEK/S1PR1/TCF4/PHLDB1/HEG1/CD34/ELN/EMILIN1/PKD2/PMP22/LDLRAD4/PDGFRB/KIRREL1/SLIT2/SELP/MFAP4/DLG4/C1QTNF2/RAMP2/FLRT2/DACT1/DLC1/NLGN2/SYT11/LDB2/KCTD12/LPAR1/KCTD10/COL6A2/KCND1/TGFB3/ARHGEF15/COLEC12/CDH5/GREM1/RHOQ/ARHGEF6/MAP7D3/PCDHB4/AR/MEF2C/STOM/WWTR1/TSPAN4/PALM/NRXN2/ANXA6/ANTXR1/CELF2/LRRC8C/FEZ1/GJA4/ACVRL1/THY1/CLIP3/PARVA/NRP1/TENM4/SYNDIG1/DPYSL3…	BP
regulation of cell migration	508/7182	906/17910	1.85157e-23	1.99784e-21	1.49373e-21	508	RECK/SYDE1/ADGRA2/TEK/S1PR1/MAP3K3/PODN/MMRN2/JAM3/LAMA2/DCN/PECAM1/PTPRM/EMILIN1/LDLRAD4/PDGFRB/AKT3/SLIT2/VEGFC/SELP/RHOJ/ENG/LAMA4/FLRT2/CYP1B1/PRKD1/TIE1/IL1R1/MEOX2/DDR2/TBXA2R/DLC1/CD200/SERPINF1/LDB2/ARSB/IGFBP5/DAB2/LPAR1/GREM1/CYGB/MCC/HGF/MEF2C/PLPP3/CAMK1D/PRKG1/FGF7/CLIC4/ACVRL1/THY1/NRP1/DPYSL3/MCAM/NAV3/ADARB1/ANGPT1/GLIPR2/MSN/PPM1F/ROR2/FOXF1/BCL2/MAGI2/TTBK2/VASH1/ROBO1/THBS4/CSF…	BP
regulation of transferase activity	506/7182	902/17910	1.97777e-23	2.11289e-21	1.57974e-21	506	ZEB2/MAPK10/TEK/MAP3K3/HEG1/PKD2/PDGFRB/HTR2A/MAP3K12/DLG4/C1QTNF2/MDFIC/PRKD1/DDR2/CD200/FZD4/LDB2/LPAR1/TGFB3/GREM1/HGF/WWTR1/PEA15/THY1/ADARB1/RASIP1/ANGPT1/PDE5A/PPM1F/ROR2/ADCY4/SERINC1/ROBO1/CSF1R/NRK/TGFBR2/PDGFRA/NOD1/ADCY9/GHR/FYN/SMPD1/CD81/F2R/LATS2/ADCY5/PKD1/FGF2/TGFB1/NR2F2/PIK3IP1/FGF1/SFRP1/SH2B3/SOCS5/PRKN/PIK3R1/ABL1/SFRP2/PDGFC/GAS6/THBS1/ITGA1/DUSP26/LRRK2/PINK1/HIPK3/P2RX7/FG…	BP
immune system development	523/7182	938/17910	2.12371e-23	2.24655e-21	1.67968e-21	523	TEK/JAM3/CD34/FBN1/TCF21/MEOX1/MEF2C/GLI3/ZEB1/GLI2/FLI1/FAM20C/STAT5B/RORA/LEPR/RBFOX2/EML1/MFAP5/GAB3/MAFB/ANGPT1/ROR2/NOTCH2/BCL2/IL34/SNRK/PBX1/CSF1R/PIP4K2A/TGFBR2/LRRC17/MEIS1/ADD1/EPAS1/GPR183/DOCK11/CD81/ADGRF5/HLX/NOTCH4/PYGO1/TGFB1/TWSG1/SH3PXD2A/SFRP1/LOXL3/SH2B3/SOCS5/PDE1B/MITF/PIK3R1/ABL1/SFRP2/GAS6/ETS1/CD248/WNT2B/THBS1/RASGRP4/NRROS/ITM2A/HDAC5/PRKCB/TGFBR3/TSPAN2/FCGR2B/CSF1/TME…	BP
regulation of anatomical structure morphogenesis	600/7182	1102/17910	2.39521e-23	2.50915e-21	1.87602e-21	600	RECK/ZEB2/ADGRA2/TEK/MAP3K3/PHLDB1/MMRN2/DCN/CD34/PTPRM/EMILIN1/AKT3/SLIT2/GLI1/TNFSF12/VEGFC/RHOJ/DLG4/ENG/GPC6/RAMP2/PRICKLE1/ZNF135/CYP1B1/PRKD1/TIE1/MEOX2/DACT1/TBXA2R/DLC1/SDC2/FBLN1/SERPINF1/PTGIS/FZD4/DAB2/LPAR1/EHD2/SPART/LZTS1/CDH5/NFATC4/GREM1/STAB1/AR/ECSCR/HGF/MEF2C/ISLR2/PALM/FGF7/RSPO3/ACVRL1/FMNL3/THY1/PARVA/NRP1/TENM4/ASPN/COL4A2/MSN/ROR2/FZD1/ANKRD6/BCL2/MAGI2/VASH1/NLGN3/ROBO1/T…	BP
leukocyte activation	639/7182	1186/17910	2.58665e-23	2.68365e-21	2.00648e-21	639	TIMP2/LRRC32/IL6ST/PECAM1/RAB31/CRISPLD2/CD200/ARSB/PLEKHO2/MEF2C/GLI3/ZEB1/STOM/GLI2/STAT5B/RORA/CD93/THY1/LEPR/MAFB/PDE5A/MSN/NOTCH2/FOXF1/CYB5R3/BCL2/STING1/ATP8B4/TGFBR2/PTPRB/PJA2/GSN/GPR183/DOCK11/FYN/CD81/ADGRF5/HLX/TGFB1/TWSG1/DYSF/AP1M1/SFRP1/VPS35L/LOXL3/SOCS5/PIK3R1/ABL1/PRCP/GAS6/PURA/YPEL5/THBS1/ITM2A/CRTC3/HDAC5/LRRK2/PRKCB/VAMP2/P2RX7/FCGR2B/TNFSF8/CCL2/CSF1/DUSP3/ZMIZ1/CD1D/IGF1/T…	BP
cell motility	833/7182	1611/17910	3.77148e-23	3.83908e-21	2.87037e-21	833	RECK/ZEB2/PLPP1/GYPC/SYDE1/ADGRA2/TEK/S1PR1/MAP3K3/NDN/CLEC14A/PODN/MMRN2/JAM3/LAMA2/DCN/CD34/PECAM1/PTPRM/JAM2/EMILIN1/LDLRAD4/PDGFRB/AKT3/SLIT2/TNFSF12/VEGFC/SELP/RHOJ/DCHS1/ENG/LAMA4/GPC6/FLRT2/CYP1B1/PRKD1/TIE1/IL1R1/CAVIN1/MEOX2/DDR2/TBXA2R/DLC1/SDC2/CD200/FBLN1/SERPINF1/LDB2/ARSB/IGFBP5/DAB2/LPAR1/GREM1/CYGB/MCC/HGF/MEF2C/GLI3/LURAP1/PLPP3/CAMK1D/PRKG1/FGF7/STAT5B/CLIC4/ACVRL1/LHX6/FMNL3/TH…	BP
localization of cell	833/7182	1611/17910	3.77148e-23	3.83908e-21	2.87037e-21	833	RECK/ZEB2/PLPP1/GYPC/SYDE1/ADGRA2/TEK/S1PR1/MAP3K3/NDN/CLEC14A/PODN/MMRN2/JAM3/LAMA2/DCN/CD34/PECAM1/PTPRM/JAM2/EMILIN1/LDLRAD4/PDGFRB/AKT3/SLIT2/TNFSF12/VEGFC/SELP/RHOJ/DCHS1/ENG/LAMA4/GPC6/FLRT2/CYP1B1/PRKD1/TIE1/IL1R1/CAVIN1/MEOX2/DDR2/TBXA2R/DLC1/SDC2/CD200/FBLN1/SERPINF1/LDB2/ARSB/IGFBP5/DAB2/LPAR1/GREM1/CYGB/MCC/HGF/MEF2C/GLI3/LURAP1/PLPP3/CAMK1D/PRKG1/FGF7/STAT5B/CLIC4/ACVRL1/LHX6/FMNL3/TH…	BP
cellular protein localization	802/7182	1543/17910	4.12463e-23	4.15932e-21	3.10981e-21	802	FBLN5/MAPK10/RAMP3/HTR2A/DCHS1/DLG4/COPZ2/GPC6/RAMP2/PRICKLE1/MDFIC/SYNE1/LTBP2/RAB31/NLGN2/SYT11/DAB2/MAP1A/EHD2/RHOQ/AR/GLIS2/GLI3/STOM/PALM/NRXN2/FGF7/SGCD/THY1/CLIP3/NRP1/SYNDIG1/CEP68/LEPROT/ANGPT1/DZIP1/CNTNAP1/DYNC2H1/CC2D2A/MSN/PPM1F/ANK2/RILPL1/PKIG/TTC7B/EPHA3/BCL2/MAGI2/TTBK2/FERMT2/SHANK3/MYADM/NEURL1B/MID2/GSN/TLN1/LRP1/PRKCH/DCLK2/SH3PXD2B/FYN/SUN2/TOR1AIP1/CD81/SMO/GLRB/ARL2BP/PKD1…	BP
blood vessel development	432/7182	751/17910	6.05215e-23	6.04655e-21	4.52083e-21	432	RECK/QKI/ADGRA2/TEK/S1PR1/MAP3K3/CLEC14A/MMRN2/JAM3/HEG1/DCN/COL8A1/CD34/PECAM1/PTPRM/EMILIN1/PKD2/PDGFRB/LTBP1/AKT3/SLIT2/TNFSF12/COL8A2/TCF21/RHOJ/ENG/RAMP2/PRICKLE1/LOXL1/CYP1B1/PRKD1/TIE1/EDNRA/ZFPM2/MEOX2/TBXA2R/SERPINF1/PTGIS/FZD4/CDH5/PLXDC1/NFATC4/GREM1/STAB1/ECSCR/HGF/MEF2C/GLI3/PRRX1/COL15A1/ANTXR1/RSPO3/GJA4/SGCD/RORA/ACVRL1/FMNL3/THY1/LEPR/PARVA/NRP1/MCAM/ELK3/PDE2A/RASIP1/MFGE8/ANGPT…	BP
positive regulation of cell migration	316/7182	516/17910	7.46838e-23	7.39301e-21	5.52754e-21	316	SYDE1/ADGRA2/TEK/S1PR1/MAP3K3/PDGFRB/AKT3/VEGFC/SELP/RHOJ/PRKD1/IL1R1/DDR2/IGFBP5/DAB2/LPAR1/HGF/PLPP3/CAMK1D/FGF7/THY1/NRP1/MCAM/ANGPT1/GLIPR2/PPM1F/ROR2/FOXF1/BCL2/THBS4/CSF1R/CXCL12/TWIST2/BMPR2/SPARC/MYADM/TGFBR2/PDGFRA/GNAI2/FLT4/LRP1/AMOTL1/GAB1/SUN2/F2R/SMO/ADAMTS1/CD99L2/FGF2/SMOC2/TGFB1/RARRES2/FGF1/DYSF/RIPOR1/PIK3R1/ABL1/NRP2/GAS6/ETS1/PLVAP/THBS1/LAMB1/FAM107A/IQSEC1/SRPX2/FGFR1/CSF1/…	BP
positive regulation of phosphorylation	529/7182	955/17910	8.29505e-23	8.13669e-21	6.08356e-21	529	ZEB2/MAPK10/TEK/MAP3K3/TIMP2/IL6ST/RAMP3/PECAM1/PKD2/PDGFRB/VEGFC/HTR2A/MAP3K12/DLG4/ENG/C1QTNF2/MDFIC/PRKD1/DDR2/FZD4/DAB2/LPAR1/TGFB3/DOK5/GREM1/AR/HGF/IGFBP4/SH3RF3/CREBL2/PEA15/FGF7/ACVRL1/CLIP3/NRP1/TMEM119/ANGPT1/GLIPR2/PDE5A/ROR2/FZD1/NOTCH2/ADCY4/BCL2/IL34/ROBO1/THBS4/CSF1R/APLNR/BMPR2/NRK/TGFBR2/PDGFRA/NOD1/CCN2/ADCY9/GNAI2/PJA2/FLT4/GPR183/GHR/LRP1/FYN/CD81/F2R/GDF6/ARL2BP/ADCY5/PKD1/FG…	BP
extracellular matrix organization	222/7182	334/17910	8.73817e-23	8.49413e-21	6.35082e-21	222	FBLN5/A2M/EFEMP2/PHLDB1/TIMP2/JAM3/LAMA2/DCN/COL8A1/ELN/PECAM1/JAM2/EMILIN1/FBN1/COL8A2/CCDC80/MFAP4/ENG/COL14A1/LAMA4/LUM/RAMP2/FLRT2/LOXL1/CYP1B1/DDR2/CRISPLD2/FBLN1/COL6A2/AEBP1/GREM1/NID1/ABI3BP/ANTXR1/FBLN2/COL6A3/MFAP5/TLL1/COL4A2/CTSK/BGN/FOXF1/VWF/HSPG2/VCAN/SPARC/PDGFRA/CCN2/LAMB2/LRP1/SH3PXD2B/TNXB/ITGA9/FGF2/SMOC2/ADAM19/TGFB1/SH3PXD2A/ITGA7/COL5A1/PHLDB2/LOXL3/ABL1/NID2/SFRP2/GAS6/ETS…	BP
hematopoietic or lymphoid organ development	498/7182	890/17910	9.45994e-23	9.11364e-21	6.814e-21	498	TEK/JAM3/CD34/FBN1/TCF21/MEOX1/MEF2C/GLI3/ZEB1/GLI2/FLI1/FAM20C/STAT5B/RORA/LEPR/RBFOX2/EML1/MFAP5/GAB3/MAFB/ANGPT1/ROR2/NOTCH2/BCL2/IL34/SNRK/PBX1/CSF1R/PIP4K2A/TGFBR2/LRRC17/MEIS1/ADD1/EPAS1/GPR183/DOCK11/CD81/ADGRF5/HLX/NOTCH4/PYGO1/TGFB1/TWSG1/SH3PXD2A/SFRP1/LOXL3/SH2B3/SOCS5/PDE1B/MITF/PIK3R1/ABL1/SFRP2/GAS6/ETS1/CD248/WNT2B/THBS1/RASGRP4/NRROS/ITM2A/HDAC5/PRKCB/TGFBR3/TSPAN2/FCGR2B/CSF1/TME…	BP
positive regulation of protein phosphorylation	506/7182	907/17910	9.94951e-23	9.50046e-21	7.10321e-21	506	ZEB2/MAPK10/TEK/MAP3K3/TIMP2/IL6ST/RAMP3/PECAM1/PKD2/PDGFRB/VEGFC/HTR2A/MAP3K12/DLG4/ENG/C1QTNF2/MDFIC/PRKD1/DDR2/FZD4/DAB2/LPAR1/TGFB3/DOK5/GREM1/AR/HGF/IGFBP4/SH3RF3/CREBL2/PEA15/FGF7/ACVRL1/CLIP3/NRP1/TMEM119/ANGPT1/GLIPR2/PDE5A/ROR2/FZD1/NOTCH2/ADCY4/BCL2/IL34/ROBO1/THBS4/CSF1R/APLNR/BMPR2/NRK/TGFBR2/PDGFRA/NOD1/CCN2/ADCY9/GNAI2/PJA2/FLT4/GPR183/GHR/LRP1/FYN/CD81/F2R/GDF6/ARL2BP/ADCY5/PKD1/FG…	BP
neuron development	551/7182	1003/17910	1.23997e-22	1.17362e-20	8.7748e-21	551	ZEB2/NDN/CNTN4/JAM3/NR2F1/LAMA2/PTPRM/PREX2/PMP22/BOC/SLIT2/CDH11/DLG4/DOK6/FLRT2/PRKD1/DENND5A/SDC2/SERPINF1/FZD4/ARSB/LPAR1/APBB1/SPART/LZTS1/DOK5/NFATC4/SLIT3/HGF/MEF2C/GLI3/PRRX1/ISLR2/FAT4/GLI2/CAMK1D/PRKG1/FEZ1/LHX6/THY1/RBFOX2/NRP1/TENM4/DPYSL3/ADARB1/KLF7/CNTNAP1/VIM/FZD1/EPHA3/BCL2/MAGI2/HDGFL3/NLGN3/ROBO1/MAP1B/CSF1R/MYH10/CXCL12/SHANK3/BMPR2/NEGR1/LGI4/MAP6/PBX3/LAMB2/LRP1/NUMBL/GNAO1/…	BP
mitotic cell cycle	518/7182	934/17910	1.6846e-22	1.5806e-20	1.18177e-20	518	FBXL7/TTC28/TIMP2/PKD2/PDGFRB/DACT1/FOXN3/LZTS1/HGF/STAT5B/EML1/KANK2/GEM/BCL2/MAGI2/PBX1/TUBA1A/MYH10/PRMT2/SMARCD3/SUN2/UBE2E2/LATS2/PKD1/ADAMTS1/SMOC2/TGFB1/CTDSP2/SPRY1/ANKRD53/TACC1/ABL1/SNX18/KLF11/GAS1/FAM107A/MAP4/PRKCB/KLHDC8B/PRDM5/FGFR1/CCL2/SEPTIN7/DUSP3/FHL1/NEK9/RHOB/IGF1/CCDC8/FGF10/FLNA/MAP9/DAPK3/CKS2/FAP/FER/GNAI1/HSPA2/MECP2/GPNMB/ZWINT/RDX/PRKAR2B/CEP126/PPP1R12B/ITGB1/DUSP1/N…	BP
positive regulation of cell differentiation	531/7182	962/17910	1.94658e-22	1.81065e-20	1.35377e-20	531	ZEB2/TCF4/TIMP2/IL6ST/CD34/BOC/SLIT2/VEGFC/HTR2A/HEYL/DLG4/ENG/RAMP2/BEND6/PRKD1/DDR2/SERPINF1/FZD4/ARSB/DAB2/LPAR1/APBB1/TGFB3/EHD2/CDH5/GREM1/AR/HGF/MEF2C/GLI3/ZEB1/WWTR1/ISLR2/GLI2/CREBL2/CAMK1D/FAM20C/STAT5B/FEZ1/ACVRL1/FRZB/NRP1/TENM4/DPYSL3/TMEM119/GLIPR2/PDE5A/ROR2/FZD1/EPHA3/LTBP3/BCL2/MAGI2/IL34/ROBO1/MAP1B/SOX17/CXCL12/SHANK3/BMPR2/MYADM/NEGR1/TGFBR2/CCN2/ADD1/SMARCD3/LRP1/PRKCH/NUMBL/S…	BP
hemopoiesis	476/7182	847/17910	2.69101e-22	2.48171e-20	1.8555e-20	476	TEK/JAM3/CD34/FBN1/MEOX1/MEF2C/GLI3/ZEB1/GLI2/FLI1/FAM20C/STAT5B/RORA/LEPR/RBFOX2/EML1/MFAP5/GAB3/MAFB/ANGPT1/ROR2/NOTCH2/BCL2/IL34/SNRK/PBX1/CSF1R/PIP4K2A/TGFBR2/LRRC17/MEIS1/ADD1/EPAS1/GPR183/DOCK11/CD81/ADGRF5/HLX/NOTCH4/PYGO1/TGFB1/TWSG1/SH3PXD2A/SFRP1/LOXL3/SH2B3/SOCS5/PDE1B/MITF/PIK3R1/ABL1/SFRP2/GAS6/ETS1/WNT2B/THBS1/RASGRP4/NRROS/ITM2A/HDAC5/PRKCB/TGFBR3/TSPAN2/FCGR2B/CSF1/TMEM91/ZMIZ1/CD…	BP
positive regulation of macromolecule biosynthetic process	868/7182	1698/17910	3.29179e-22	3.01003e-20	2.25051e-20	868	ERG/ZEB2/RBMS3/S1PR1/TCF4/NDN/NR3C1/NR2F1/DCN/PKD2/PDGFRB/GLI1/TCF21/MAP3K12/HEYL/ENG/C1QTNF2/LUM/MDFIC/PRKD1/ZFPM2/MEOX2/ZNF423/FZD4/DAB2/APBB1/TGFB3/MAF/GREM1/RHOQ/EBF3/AR/GLIS2/HGF/MEF2C/GLI3/ZEB1/PRRX1/WWTR1/GLI2/CREBL2/FLI1/FGF7/STAT5B/RORA/ACVRL1/NFIA/ELK3/MAFB/CREBRF/KLF7/VIM/ROR2/FZD1/CALCOCO1/FOXF1/PBX1/STING1/SKI/SOX17/BMPR2/MEIS1/EPAS1/PRMT2/PBX3/MEF2D/HCFC2/NOTCH3/SMARCD3/MEIS3/TGFB1I…	BP
regulation of cell motility	532/7182	966/17910	3.45248e-22	3.13044e-20	2.34054e-20	532	RECK/SYDE1/ADGRA2/TEK/S1PR1/MAP3K3/PODN/MMRN2/JAM3/LAMA2/DCN/PECAM1/PTPRM/EMILIN1/LDLRAD4/PDGFRB/AKT3/SLIT2/VEGFC/SELP/RHOJ/ENG/LAMA4/FLRT2/CYP1B1/PRKD1/TIE1/IL1R1/CAVIN1/MEOX2/DDR2/TBXA2R/DLC1/CD200/FBLN1/SERPINF1/LDB2/ARSB/IGFBP5/DAB2/LPAR1/GREM1/CYGB/MCC/HGF/MEF2C/PLPP3/CAMK1D/PRKG1/FGF7/CLIC4/ACVRL1/THY1/NRP1/DPYSL3/MCAM/NAV3/ADARB1/ANGPT1/GLIPR2/MSN/PPM1F/ROR2/FOXF1/BCL2/MAGI2/TTBK2/VASH1/RO…	BP
neuron differentiation	661/7182	1244/17910	4.3755e-22	3.93431e-20	2.94157e-20	661	ZEB2/S1PR1/TCF4/NDN/ZNF521/TIMP2/CNTN4/JAM3/NR2F1/LAMA2/PTPRM/PREX2/PMP22/BOC/SLIT2/CDH11/HEYL/DLG4/DOK6/BEND6/FLRT2/PRKD1/DENND5A/SDC2/SERPINF1/FZD4/ARSB/LPAR1/APBB1/SPART/LZTS1/DOK5/NFATC4/SLIT3/HGF/MEF2C/GLI3/ZEB1/PRRX1/ISLR2/FAT4/GLI2/CAMK1D/PRKG1/FEZ1/RORA/LHX6/THY1/RBFOX2/NRP1/TENM4/DPYSL3/ADARB1/KLF7/CNTNAP1/VIM/DYNC2H1/FZD1/EPHA3/BCL2/MAGI2/HDGFL3/PBX1/NLGN3/ROBO1/MAP1B/CSF1R/MYH10/CXCL12…	BP
positive regulation of cell motility	325/7182	540/17910	1.01743e-21	9.07281e-20	6.78348e-20	325	SYDE1/ADGRA2/TEK/S1PR1/MAP3K3/PDGFRB/AKT3/VEGFC/SELP/RHOJ/PRKD1/IL1R1/CAVIN1/DDR2/IGFBP5/DAB2/LPAR1/HGF/PLPP3/CAMK1D/FGF7/THY1/NRP1/MCAM/ANGPT1/GLIPR2/PPM1F/ROR2/FOXF1/BCL2/THBS4/CSF1R/CXCL12/TWIST2/BMPR2/SPARC/MYADM/TGFBR2/PDGFRA/GNAI2/FLT4/LRP1/AMOTL1/GAB1/SUN2/F2R/SMO/ADAMTS1/CD99L2/FGF2/SMOC2/TGFB1/RARRES2/FGF1/DYSF/RIPOR1/PIK3R1/ABL1/NRP2/GAS6/ETS1/PLVAP/THBS1/LAMB1/FAM107A/IQSEC1/SRPX2/FGFR…	BP
response to oxygen-containing compound	798/7182	1551/17910	2.16956e-21	1.91882e-19	1.43464e-19	798	FBLN5/IGFBP7/MAPK10/TEK/NR3C1/PLSCR4/GUCY1B1/DCN/RAMP3/PKD2/PTGIR/PDGFRB/SLIT2/FBN1/SELP/HTR2A/FIBIN/RAMP2/LOXL1/CYP1B1/PRKD1/TIE1/TBXA2R/RAB31/SERPINF1/FZD4/IGFBP5/KCNJ8/LPAR1/COL6A2/DHH/TGFB3/COLEC12/BACE1/NFATC4/RHOQ/AR/SLIT3/HGF/MEF2C/ZEB1/GLP2R/PTGFR/STAT5B/RORA/PDE2A/LEPROT/KANK2/KLF7/VIM/MSN/ADCY4/KLF9/SESN3/EPHA3/BCL2/MAP1B/CXCL12/SPARC/CDO1/TGFBR2/PDGFRA/NOD1/CCN2/ADCY9/GNAI2/GSN/GHR/LRP…	BP
positive regulation of cellular component movement	331/7182	555/17910	3.39898e-21	2.94149e-19	2.19927e-19	331	SYDE1/ADGRA2/TEK/S1PR1/MAP3K3/PDGFRB/AKT3/VEGFC/SELP/RHOJ/PRKD1/IL1R1/CAVIN1/DDR2/IGFBP5/DAB2/LPAR1/HGF/PLPP3/CAMK1D/FGF7/FEZ1/THY1/NRP1/MCAM/ANGPT1/GLIPR2/PPM1F/ROR2/FOXF1/BCL2/THBS4/CSF1R/CXCL12/TWIST2/BMPR2/SPARC/MYADM/TGFBR2/PDGFRA/GNAI2/FLT4/LRP1/AMOTL1/GAB1/SUN2/F2R/SMO/ADAMTS1/CD99L2/FGF2/SMOC2/TGFB1/RARRES2/FGF1/DYSF/RIPOR1/PIK3R1/ABL1/NRP2/GAS6/ETS1/PLVAP/THBS1/LAMB1/FAM107A/IQSEC1/SRPX2…	BP
supramolecular fiber organization	330/7182	553/17910	3.42654e-21	2.94149e-19	2.19927e-19	330	FBLN5/EFEMP2/S1PR1/ELN/EMILIN1/PDGFRB/KIRREL1/SLIT2/MFAP4/COL14A1/LUM/CYP1B1/DDR2/DLC1/LTBP2/LPAR1/TGFB3/ARHGEF15/AEBP1/GREM1/MAP7D3/MEF2C/CLIP3/NRP1/MFAP5/DPYSL3/NAV3/VIM/PPM1F/BCL2/TTBK2/HDGFL3/NCKAP5L/MAP1B/MYH10/CXCL12/SHANK3/MYADM/PDGFRA/CCN2/ADD1/GSN/BMERB1/FCHSD2/SH3PXD2B/TNXB/JMY/MEF2A/WIPF1/PDLIM3/EVL/COL5A1/SFRP1/PHLDB2/ANKRD53/LOXL3/TMOD2/SHROOM4/PRKN/PIK3R1/ABL1/SFRP2/TMOD1/CRYAB/FAM1…	BP
positive regulation of phosphorus metabolic process	556/7182	1025/17910	3.43492e-21	2.94149e-19	2.19927e-19	556	ZEB2/MAPK10/TEK/MAP3K3/TIMP2/IL6ST/RAMP3/PECAM1/PKD2/PDGFRB/VEGFC/HTR2A/MAP3K12/DLG4/ENG/C1QTNF2/MDFIC/PRKD1/DDR2/DLC1/FZD4/DAB2/LPAR1/TGFB3/DOK5/GREM1/AR/HGF/MEF2C/IGFBP4/SH3RF3/CREBL2/PEA15/FGF7/ACVRL1/CLIP3/NRP1/TMEM119/ANGPT1/GLIPR2/PDE5A/ROR2/FZD1/NOTCH2/ADCY4/BCL2/MAGI2/IL34/ROBO1/THBS4/CSF1R/APLNR/BMPR2/NRK/TGFBR2/PDGFRA/NOD1/CCN2/ADCY9/GNAI2/PJA2/FLT4/GPR183/GHR/LRP1/FYN/SMPD1/CD81/F2R/AD…	BP
positive regulation of phosphate metabolic process	556/7182	1025/17910	3.43492e-21	2.94149e-19	2.19927e-19	556	ZEB2/MAPK10/TEK/MAP3K3/TIMP2/IL6ST/RAMP3/PECAM1/PKD2/PDGFRB/VEGFC/HTR2A/MAP3K12/DLG4/ENG/C1QTNF2/MDFIC/PRKD1/DDR2/DLC1/FZD4/DAB2/LPAR1/TGFB3/DOK5/GREM1/AR/HGF/MEF2C/IGFBP4/SH3RF3/CREBL2/PEA15/FGF7/ACVRL1/CLIP3/NRP1/TMEM119/ANGPT1/GLIPR2/PDE5A/ROR2/FZD1/NOTCH2/ADCY4/BCL2/MAGI2/IL34/ROBO1/THBS4/CSF1R/APLNR/BMPR2/NRK/TGFBR2/PDGFRA/NOD1/CCN2/ADCY9/GNAI2/PJA2/FLT4/GPR183/GHR/LRP1/FYN/SMPD1/CD81/F2R/AD…	BP
regulation of kinase activity	453/7182	807/17910	3.99905e-21	3.39762e-19	2.5403e-19	453	ZEB2/MAPK10/TEK/MAP3K3/HEG1/PKD2/PDGFRB/HTR2A/MAP3K12/DLG4/C1QTNF2/MDFIC/PRKD1/DDR2/FZD4/LDB2/LPAR1/TGFB3/GREM1/HGF/WWTR1/PEA15/THY1/ADARB1/RASIP1/ANGPT1/PDE5A/PPM1F/ROR2/ADCY4/ROBO1/CSF1R/NRK/TGFBR2/PDGFRA/NOD1/ADCY9/GHR/FYN/SMPD1/CD81/F2R/LATS2/ADCY5/PKD1/FGF2/TGFB1/NR2F2/PIK3IP1/FGF1/SFRP1/SH2B3/SOCS5/PRKN/PIK3R1/ABL1/SFRP2/PDGFC/GAS6/THBS1/ITGA1/DUSP26/LRRK2/PINK1/HIPK3/P2RX7/FGFR1/CSF1/ILK/D…	BP
regulation of protein kinase activity	417/7182	732/17910	4.26054e-21	3.5915e-19	2.68526e-19	417	ZEB2/MAPK10/MAP3K3/HEG1/PKD2/PDGFRB/HTR2A/MAP3K12/DLG4/C1QTNF2/MDFIC/DDR2/FZD4/LPAR1/TGFB3/GREM1/HGF/WWTR1/PEA15/THY1/ADARB1/RASIP1/ANGPT1/PDE5A/PPM1F/ROR2/ADCY4/ROBO1/CSF1R/NRK/TGFBR2/NOD1/ADCY9/GHR/FYN/SMPD1/CD81/F2R/LATS2/ADCY5/PKD1/FGF2/TGFB1/NR2F2/FGF1/SFRP1/SH2B3/SOCS5/ABL1/SFRP2/PDGFC/GAS6/THBS1/ITGA1/DUSP26/LRRK2/PINK1/HIPK3/P2RX7/FGFR1/CSF1/ILK/DUSP3/SASH1/NGF/IGF1/RASSF2/ATP2B4/FZD8/ITG…	BP
positive regulation of locomotion	338/7182	570/17910	4.75637e-21	3.97839e-19	2.97453e-19	338	SYDE1/ADGRA2/TEK/S1PR1/MAP3K3/PDGFRB/AKT3/SLIT2/VEGFC/SELP/RHOJ/PRKD1/IL1R1/CAVIN1/DDR2/IGFBP5/DAB2/LPAR1/HGF/PLPP3/CAMK1D/FGF7/THY1/NRP1/MCAM/ANGPT1/GLIPR2/PPM1F/ROR2/FOXF1/BCL2/THBS4/CSF1R/CXCL12/TWIST2/BMPR2/SPARC/MYADM/TGFBR2/PDGFRA/GNAI2/FLT4/LRP1/AMOTL1/GAB1/SUN2/F2R/SMO/ADAMTS1/CD99L2/FGF2/SMOC2/TGFB1/RARRES2/FGF1/DYSF/RIPOR1/PIK3R1/ABL1/NRP2/GAS6/ETS1/PLVAP/THBS1/LAMB1/FAM107A/IQSEC1/SRPX…	BP
regulation of locomotion	560/7182	1035/17910	5.14634e-21	4.27146e-19	3.19365e-19	560	RECK/SYDE1/ADGRA2/TEK/S1PR1/MAP3K3/PODN/MMRN2/JAM3/LAMA2/DCN/PECAM1/PTPRM/EMILIN1/LDLRAD4/PDGFRB/AKT3/SLIT2/VEGFC/SELP/RHOJ/ENG/LAMA4/FLRT2/CYP1B1/PRKD1/TIE1/IL1R1/CAVIN1/MEOX2/DDR2/TBXA2R/DLC1/CD200/FBLN1/SERPINF1/LDB2/ARSB/IGFBP5/DAB2/LPAR1/GREM1/CYGB/MCC/HGF/MEF2C/PLPP3/CAMK1D/PRKG1/FGF7/CLIC4/ACVRL1/THY1/NRP1/DPYSL3/MCAM/NAV3/ADARB1/ANGPT1/GLIPR2/MSN/PPM1F/ROR2/FOXF1/BCL2/MAGI2/TTBK2/VASH1/RO…	BP
cell morphogenesis involved in differentiation	368/7182	632/17910	6.53382e-21	5.38167e-19	4.02372e-19	368	ZEB2/TEK/NDN/CNTN4/LAMA2/HEG1/PECAM1/PTPRM/PREX2/BOC/SLIT2/CDH11/DLG4/DOK6/FLRT2/SDC2/FBLN1/FZD4/APBB1/SPART/LZTS1/DOK5/NFATC4/AR/SLIT3/MEF2C/GLI3/ISLR2/GLI2/ANTXR1/CLIC4/FEZ1/THY1/PARVA/RBFOX2/NRP1/ADARB1/KLF7/RILPL1/BCL2/NLGN3/ROBO1/FERMT2/MAP1B/CSF1R/SOX17/MYH10/CXCL12/SHANK3/BMPR2/MYADM/MAP6/PEAK1/LAMB2/LRP1/NUMBL/GAB1/FYN/MEF2A/NOTCH4/SCN1B/SEMA3G/ATL1/EVL/TRAK2/PIK3R1/ABL1/PLXNA4/DPYSL2/NRP…	BP
cellular response to endogenous stimulus	683/7182	1305/17910	1.21024e-20	9.89281e-19	7.39657e-19	683	IGFBP7/FSTL1/PLPP1/NR3C1/LRRC32/NR2F1/RAMP3/EMILIN1/PKD2/LDLRAD4/PDGFRB/LTBP1/SLIT2/FBN1/TCF21/HEYL/ENG/FLRT2/ZNF423/LTBP2/RAB31/SERPINF1/IGFBP5/DAB2/TGFB3/CDH5/BACE1/GREM1/RHOQ/AR/SLIT3/MEF2C/ZEB1/GLP2R/FAT4/PTGFR/FAM20C/FGF7/ZNF366/STAT5B/RORA/ACVRL1/LEPR/RBFOX2/CYP7B1/DKK3/PDE2A/LEPROT/KANK2/CREBRF/ASPN/VIM/COL4A2/MSN/ROR2/FZD1/CALCOCO1/ADCY4/KLF9/SESN3/MAGI2/SKI/FERMT2/MAP1B/BMPR2/TGFBR2/PDGF…	BP
positive regulation of nucleobase-containing compound metabolic process	868/7182	1715/17910	1.35311e-20	1.09775e-18	8.20756e-19	868	ERG/ZEB2/S1PR1/TCF4/NDN/NR3C1/NR2F1/DCN/PKD2/PDGFRB/GLI1/HTR2A/TCF21/MAP3K12/HEYL/ENG/LUM/MDFIC/PRKD1/ZFPM2/MEOX2/ZNF423/FZD4/DAB2/APBB1/TGFB3/MAF/GREM1/RHOQ/EBF3/AR/GLIS2/HGF/MEF2C/GLI3/ZEB1/PRRX1/WWTR1/GLI2/CREBL2/FLI1/FGF7/STAT5B/RORA/ACVRL1/NFIA/ELK3/MAFB/CREBRF/KLF7/ROR2/FZD1/CALCOCO1/FOXF1/PBX1/STING1/SKI/SOX17/BMPR2/MEIS1/EPAS1/PRMT2/PBX3/MEF2D/FTO/HCFC2/NOTCH3/SMARCD3/MEIS3/TGFB1I1/EZH1/C…	BP
macromolecule biosynthetic process	2197/7182	4806/17910	1.36538e-20	1.09943e-18	8.22014e-19	2197	ERG/ZEB2/FSTL1/QKI/RBMS3/MAN1C1/MAPK10/S1PR1/TCF4/NDN/GAS7/ZNF521/HIC1/NR3C1/ZBTB47/GGT5/JAZF1/NR2F1/DCN/BHLHE22/PKD2/PDGFRB/GLI1/FBN1/CSGALNACT2/TCF21/MAP3K12/SETBP1/HEYL/ENG/POU6F1/C1QTNF2/GPC6/LUM/PKNOX2/BEND6/BNC2/PRICKLE1/ZNF135/MDFIC/CYP1B1/PRKD1/RUNX1T1/ZFPM2/CAVIN1/MEOX2/ZNF423/DDR2/OMD/DACT1/SDC2/CD200/FOXN3/PTGIS/FZD4/IGFBP5/DAB2/TCEAL7/ZBTB4/ZNF25/GALNT16/APBB1/TGFB3/LZTS1/AEBP1/NFATC4…	BP
negative regulation of response to stimulus	825/7182	1620/17910	1.65349e-20	1.32157e-18	9.88099e-19	825	A2M/RBMS3/ADGRA2/TEK/MAP3K3/CLIC2/TIMP2/MMRN2/HIC1/HEG1/DCN/CD34/BICC1/EMILIN1/PKD2/PTGIR/LDLRAD4/LTBP1/AKT3/SLIT2/GLI1/FBN1/ITPR1/TCF21/SERPING1/HEYL/BEND6/PRICKLE1/RGS7BP/DACT1/DLC1/CD200/FBLN1/SERPINF1/PTGIS/IGFBP5/DAB2/LPAR1/TGFB3/CDH5/BACE1/NFATC4/GREM1/TIMP3/MCC/AR/GLIS2/SLIT3/HGF/GLI3/IGFBP4/WWTR1/PALM/PRKG1/PEA15/ZNF366/GPRASP1/RORA/THY1/FRZB/NRP1/WWC3/CYP7B1/DKK3/PDE2A/LEPROT/KANK2/CREBR…	BP
tissue development	978/7182	1964/17910	1.9853e-20	1.5751e-18	1.17766e-18	978	ZEB2/S1PR1/PHLDB1/MGP/EVC/HEG1/DCN/COL8A1/CD34/ELN/PECAM1/PKD2/LDLRAD4/PDGFRB/SLIT2/GLI1/VEGFC/TCF21/CPQ/HEYL/DCHS1/ENG/GPC6/LUM/BNC2/PRICKLE1/CYP1B1/TIE1/EDNRA/ZFPM2/MEOX2/DDR2/OMD/DACT1/DLC1/PTGIS/FZD4/LDB2/IGFBP5/DAB2/S1PR3/THBS3/TGFB3/SPART/CDH5/FAM172A/NFATC4/MAF/GREM1/EFEMP1/MEOX1/AR/HGF/MEF2C/GLI3/ZEB1/PRRX1/WWTR1/FAT4/GLI2/FAM20C/FGF7/STAT5B/RSPO3/CLIC4/GJA4/SGCD/ACVRL1/FRZB/NRP1/CYP7B1/T…	BP
regulation of cellular component biogenesis	490/7182	891/17910	2.52851e-20	1.99144e-18	1.48894e-18	490	TEK/S1PR1/PHLDB1/ELN/EMILIN1/LDLRAD4/KIRREL1/SLIT2/SELP/FLRT2/DACT1/DLC1/NLGN2/SYT11/LDB2/LPAR1/TGFB3/ARHGEF15/GREM1/RHOQ/MEF2C/PALM/ANTXR1/FEZ1/ACVRL1/THY1/CLIP3/NRP1/SYNDIG1/DPYSL3/NAV3/RASIP1/DZIP1/MSN/PPM1F/FZD1/EPHA3/NLGN3/MAP1B/SHANK3/TRABD2B/PIP4K2A/MYADM/CCN2/ADD1/PEAK1/GPBAR1/GSN/DOCK11/LRP1/PRKCH/CLSTN3/FCHSD2/SH3PXD2B/JMY/TGFB1/EVL/MDGA1/SFRP1/PHLDB2/ANKRD53/MITF/TMOD2/PRKN/PIK3R1/ABL1…	BP
positive regulation of transferase activity	355/7182	609/17910	2.55804e-20	2.00009e-18	1.49541e-18	355	ZEB2/MAPK10/TEK/MAP3K3/PKD2/PDGFRB/HTR2A/MAP3K12/DLG4/C1QTNF2/MDFIC/PRKD1/DDR2/CD200/FZD4/LPAR1/TGFB3/GREM1/HGF/PEA15/ANGPT1/PDE5A/ROR2/ADCY4/SERINC1/ROBO1/CSF1R/NRK/TGFBR2/PDGFRA/NOD1/ADCY9/GHR/FYN/CD81/F2R/ADCY5/PKD1/FGF2/TGFB1/FGF1/ABL1/PDGFC/GAS6/THBS1/ITGA1/LRRK2/PINK1/P2RX7/FGFR1/CSF1/ILK/SASH1/NGF/IGF1/P2RY12/RASSF2/ATP2B4/TNFAIP8L3/FZD8/ITGB3/PRKACB/FGF10/NOX4/ITSN1/CKS2/DSTYK/CCN1/CSPG4/…	BP
cell-substrate adhesion	210/7182	322/17910	4.03013e-20	3.1229e-18	2.3349e-18	210	FBLN5/TEK/JAM3/COL8A1/CD34/PECAM1/EMILIN1/ECM2/CCDC80/DLC1/FBLN1/FZD4/THBS3/GREM1/NID1/ABI3BP/ANTXR1/ACVRL1/THY1/PARVA/NRP1/ANGPT1/PPM1F/EPHA3/FOXF1/BCL2/VWF/FERMT2/MYADM/CCN2/PEAK1/LRP1/SNED1/SGCE/PKD1/SMOC2/ITGA7/SFRP1/PHLDB2/PIK3R1/ABL1/NID2/GAS6/THBS1/LAMB1/ITGA1/FAM107A/UTRN/CSF1/MACF1/ILK/DUSP3/APOD/PTN/KDR/COL16A1/COL3A1/ACTN1/LGALS1/RADIL/ITGB3/SORBS1/PREX1/FLNA/RSU1/DAPK3/ZYX/VCL/ITGAV/F…	BP
blood vessel morphogenesis	384/7182	670/17910	4.05196e-20	3.1229e-18	2.3349e-18	384	RECK/QKI/ADGRA2/TEK/S1PR1/MAP3K3/CLEC14A/MMRN2/JAM3/HEG1/DCN/COL8A1/CD34/PECAM1/PTPRM/EMILIN1/PKD2/PDGFRB/AKT3/SLIT2/TNFSF12/COL8A2/TCF21/RHOJ/ENG/RAMP2/CYP1B1/PRKD1/TIE1/EDNRA/ZFPM2/MEOX2/TBXA2R/SERPINF1/PTGIS/FZD4/CDH5/PLXDC1/NFATC4/GREM1/STAB1/ECSCR/HGF/PRRX1/COL15A1/RSPO3/SGCD/RORA/ACVRL1/FMNL3/THY1/LEPR/PARVA/NRP1/MCAM/ELK3/RASIP1/MFGE8/ANGPT1/COL4A2/FOXF1/VASH1/THSD7A/ROBO1/THBS4/HSPG2/SOX1…	BP
Ras protein signal transduction	211/7182	324/17910	4.24195e-20	3.24614e-18	2.42705e-18	211	TIMP2/HEG1/PECAM1/PREX2/PDGFRB/PRKD1/MRAS/DLC1/ARHGEF17/LPAR1/RASGRF2/ARHGEF15/CYTH3/ARHGEF6/NRP1/KANK2/RASIP1/NOTCH2/ARHGEF25/ROBO1/FGD5/NISCH/F2R/FGF2/RIPOR1/ABL1/RASGRP4/ABCA1/SYNGAP1/ARHGEF40/IQSEC1/FGD1/CSF1/ELMO1/NGF/RHOB/WASF2/IGF1/COL1A2/COL3A1/RASA3/MAPRE2/FGF10/PREX1/ARHGEF9/ITSN1/PLEKHG1/ARHGAP29/NTN1/ARHGAP1/ITPKB/KSR1/MYO9B/RAPGEF1/SHC2/RDX/ITGB1/MAPK11/ARHGAP6/NGFR/RAP1A/PLEKHG2/RRA…	BP
regulation of cytoskeleton organization	286/7182	471/17910	4.98512e-20	3.78799e-18	2.83217e-18	286	SYDE1/TEK/S1PR1/PHLDB1/JAM3/ELN/PDGFRB/KIRREL1/SLIT2/DLC1/LPAR1/TGFB3/ARHGEF15/RHOQ/MEF2C/CLIC4/CLIP3/NRP1/NAV3/AFAP1/PPM1F/NOTCH2/EPHA3/TTBK2/HDGFL3/MAP1B/CSF1R/CXCL12/SHANK3/MYADM/PDGFRA/CCN2/ADD1/GSN/LRP1/BMERB1/FCHSD2/SH3PXD2B/JMY/PKD1/TGFB1/EVL/SFRP1/PHLDB2/ANKRD53/TMOD2/PRKN/PIK3R1/ABL1/TMOD1/FAM107A/DIXDC1/P2RX7/ILK/WASF2/PAM/LMOD1/PREX1/NOX4/FLNA/MAP9/DAPK3/KAT2B/FER/GNAI1/MECP2/NEXN/ASAP…	BP
regulation of apoptotic process	774/7182	1512/17910	5.40723e-20	4.08e-18	3.0505e-18	774	PDE1A/SEPTIN4/TEK/IL6ST/PDGFRB/SLIT2/TNFSF12/MAP3K12/GIMAP8/RAMP2/CYP1B1/DLC1/ARHGEF17/PTGIS/DAB2/LPAR1/APBB1/RASGRF2/TGFB3/BACE1/NFATC4/GREM1/ARHGEF6/TIMP3/AR/ECSCR/HGF/MEF2C/GLI3/GLI2/PTGFR/CAMK1D/PEA15/STAT5B/CLIP3/FRZB/RPS6KA2/NRP1/CALHM2/ANGPT1/PPM1F/SRPX/NOTCH2/BCL2/ROBO1/CSF1R/CXCL12/TWIST2/NOD1/CCN2/GNAI2/PRMT2/FLT4/GSN/MEIS3/LRP1/PRKCH/FYN/SMPD1/F2R/SMO/JMY/ALDH1A3/SFRP4/TXNIP/TGFB1/EDNR…	BP
regulation of cellular component movement	561/7182	1046/17910	5.9895e-20	4.48797e-18	3.35552e-18	561	RECK/SYDE1/ADGRA2/TEK/S1PR1/MAP3K3/PODN/MMRN2/JAM3/LAMA2/DCN/PECAM1/PTPRM/EMILIN1/LDLRAD4/PDGFRB/AKT3/SLIT2/VEGFC/SELP/RHOJ/ENG/LAMA4/FLRT2/CYP1B1/PRKD1/TIE1/IL1R1/CAVIN1/MEOX2/DDR2/TBXA2R/DLC1/CD200/FBLN1/SERPINF1/LDB2/ARSB/IGFBP5/DAB2/LPAR1/GREM1/CYGB/MCC/HGF/MEF2C/PLPP3/CAMK1D/PRKG1/FGF7/CLIC4/FEZ1/ACVRL1/THY1/NRP1/DPYSL3/MCAM/NAV3/ADARB1/ANGPT1/GLIPR2/MSN/PPM1F/ROR2/ANK2/FOXF1/BCL2/MAGI2/TTBK…	BP
extracellular structure organization	243/7182	387/17910	7.80388e-20	5.80716e-18	4.34185e-18	243	FBLN5/A2M/EFEMP2/PHLDB1/TIMP2/JAM3/LAMA2/DCN/COL8A1/CD34/ELN/PECAM1/JAM2/EMILIN1/FBN1/COL8A2/CCDC80/MFAP4/ENG/COL14A1/LAMA4/LUM/RAMP2/FLRT2/LOXL1/CYP1B1/DDR2/CRISPLD2/FBLN1/COL6A2/AEBP1/GREM1/NID1/ABI3BP/ANTXR1/FBLN2/COL6A3/MFAP5/TLL1/COL4A2/CTSK/BGN/FOXF1/VWF/HSPG2/VCAN/SPARC/PDGFRA/CCN2/LAMB2/LRP1/SH3PXD2B/TNXB/ITGA9/FGF2/SMOC2/ADAM19/TGFB1/SH3PXD2A/ITGA7/COL5A1/PHLDB2/LOXL3/ABL1/NID2/SFRP2/GAS…	BP
positive regulation of cellular biosynthetic process	906/7182	1809/17910	8.4388e-20	6.19494e-18	4.63178e-18	906	ERG/ZEB2/RBMS3/S1PR1/TCF4/NDN/NR3C1/NR2F1/DCN/PKD2/PDGFRB/GLI1/HTR2A/TCF21/MAP3K12/HEYL/ENG/C1QTNF2/LUM/MDFIC/PRKD1/ZFPM2/MEOX2/ZNF423/FZD4/DAB2/APBB1/TGFB3/MAF/GREM1/RHOQ/EBF3/AR/GLIS2/HGF/MEF2C/GLI3/ZEB1/PRRX1/WWTR1/GLI2/CREBL2/FLI1/FGF7/STAT5B/RORA/ACVRL1/NFIA/ELK3/MAFB/CREBRF/KLF7/VIM/ROR2/FZD1/CALCOCO1/FOXF1/PBX1/STING1/SKI/SOX17/BMPR2/MEIS1/EPAS1/PRMT2/PBX3/MEF2D/HCFC2/NOTCH3/SMARCD3/MEIS3/…	BP
positive regulation of transcription, DNA-templated	708/7182	1368/17910	8.43982e-20	6.19494e-18	4.63178e-18	708	ERG/ZEB2/S1PR1/TCF4/NDN/NR3C1/NR2F1/DCN/PKD2/GLI1/TCF21/MAP3K12/HEYL/ENG/LUM/MDFIC/PRKD1/ZFPM2/MEOX2/ZNF423/FZD4/DAB2/APBB1/TGFB3/MAF/GREM1/RHOQ/EBF3/AR/GLIS2/HGF/MEF2C/GLI3/ZEB1/PRRX1/WWTR1/GLI2/CREBL2/FLI1/FGF7/STAT5B/RORA/ACVRL1/NFIA/ELK3/MAFB/CREBRF/KLF7/ROR2/FZD1/CALCOCO1/FOXF1/PBX1/STING1/SKI/SOX17/BMPR2/MEIS1/EPAS1/PRMT2/PBX3/MEF2D/NOTCH3/SMARCD3/MEIS3/TGFB1I1/EZH1/CD81/F2R/SMO/GDF6/PKD1/M…	BP
regulation of cell death	839/7182	1659/17910	8.80853e-20	6.4219e-18	4.80146e-18	839	PDE1A/SEPTIN4/TEK/IL6ST/CD34/RAMP3/PDGFRB/SLIT2/TNFSF12/MAP3K12/GIMAP8/RAMP2/CYP1B1/PRKD1/ZFPM2/DLC1/CD200/ARHGEF17/SERPINF1/PTGIS/DAB2/LPAR1/APBB1/RASGRF2/TGFB3/BACE1/NFATC4/GREM1/ARHGEF6/TIMP3/AR/ECSCR/HGF/MEF2C/GLI3/GLI2/PTGFR/CAMK1D/PEA15/STAT5B/CLIP3/FRZB/RPS6KA2/NRP1/CALHM2/KANK2/ANGPT1/PPM1F/SRPX/RILPL1/FZD1/NOTCH2/BCL2/ROBO1/CSF1R/CXCL12/TWIST2/NOD1/CCN2/GNAI2/PRMT2/FLT4/GSN/MEIS3/LRP1/PR…	BP
enzyme linked receptor protein signaling pathway	524/7182	968/17910	9.2264e-20	6.6814e-18	4.99549e-18	524	FSTL1/ADGRA2/TEK/NDN/MMRN2/LRRC32/IL6ST/DCN/EMILIN1/PTGIR/LDLRAD4/PDGFRB/LTBP1/FBN1/VEGFC/ENG/NPR2/FLRT2/PRKD1/ZNF423/DDR2/SDC2/LTBP2/FZD4/IGFBP5/DAB2/TGFB3/CDH5/DOK5/NFATC4/GREM1/EFEMP1/RHOQ/AR/HGF/ZEB1/IGFBP4/WWTR1/FAT4/FAM20C/FGF7/STAT5B/ACVRL1/RBFOX2/NRP1/DKK3/LEPROT/ASPN/ANGPT1/VIM/ROR2/FZD1/SESN3/EPHA3/MAGI2/ROBO1/SKI/FERMT2/CSF1R/BMPR2/TGFBR2/PDGFRA/CCN2/GNAI2/FLT4/LTBP4/GHR/LRP1/CHRDL1/NP…	BP
regulation of small GTPase mediated signal transduction	206/7182	316/17910	9.89703e-20	7.11926e-18	5.32287e-18	206	A2M/SYDE1/ARHGAP31/TIMP2/HEG1/PREX2/PDGFRB/SLIT2/RHOJ/STARD8/DLC1/ARHGEF17/ARHGAP20/LPAR1/RASGRF2/ARHGEF15/CYTH3/RHOQ/ARHGEF6/NRP1/KANK2/RASIP1/NOTCH2/FAM13B/ARHGEF25/ROBO1/ARHGAP22/FGD5/F2R/CDON/MYO9A/ABL1/RASGRP4/ABCA1/ARHGAP15/SYNGAP1/ARHGEF40/IQSEC1/FGD1/ARHGAP10/CSF1/ARHGAP24/CGNL1/NGF/RHOB/IGF1/COL3A1/RASA3/MAPRE2/FGF10/STARD13/PREX1/ARHGEF9/ITSN1/PLEKHG1/ARHGAP29/ARHGAP1/ITPKB/MYO9B/RAPGEF…	BP
response to growth factor	398/7182	704/17910	2.17249e-19	1.5524e-17	1.16068e-17	398	FSTL1/ADGRA2/NDN/MMRN2/NR3C1/LRRC32/DCN/EMILIN1/LDLRAD4/PDGFRB/LTBP1/SLIT2/FBN1/VEGFC/HEYL/ENG/LUM/RAMP2/FLRT2/PRKD1/ZNF423/LTBP2/FZD4/DAB2/TGFB3/CDH5/DOK5/GREM1/HGF/MEF2C/ZEB1/FAT4/FAM20C/FGF7/STAT5B/FEZ1/ACVRL1/RBFOX2/NRP1/DKK3/PDE2A/ASPN/COL4A2/ROR2/FZD1/MAGI2/ROBO1/SKI/FERMT2/MAP1B/BMPR2/SPARC/TGFBR2/PDGFRA/CCN2/FLT4/LTBP4/CHRDL1/TGFB1I1/GAB1/FYN/GDF6/SFRP4/FGF2/SMOC2/TGFB1/TWSG1/FGF1/SPRY1/S…	BP
regulation of programmed cell death	783/7182	1539/17910	2.52649e-19	1.79348e-17	1.34093e-17	783	PDE1A/SEPTIN4/TEK/IL6ST/PDGFRB/SLIT2/TNFSF12/MAP3K12/GIMAP8/RAMP2/CYP1B1/DLC1/ARHGEF17/PTGIS/DAB2/LPAR1/APBB1/RASGRF2/TGFB3/BACE1/NFATC4/GREM1/ARHGEF6/TIMP3/AR/ECSCR/HGF/MEF2C/GLI3/GLI2/PTGFR/CAMK1D/PEA15/STAT5B/CLIP3/FRZB/RPS6KA2/NRP1/CALHM2/KANK2/ANGPT1/PPM1F/SRPX/NOTCH2/BCL2/ROBO1/CSF1R/CXCL12/TWIST2/NOD1/CCN2/GNAI2/PRMT2/FLT4/GSN/MEIS3/LRP1/PRKCH/FYN/SMPD1/F2R/SMO/JMY/ALDH1A3/SFRP4/TXNIP/TGFB…	BP
regulation of hydrolase activity	611/7182	1160/17910	2.58991e-19	1.82648e-17	1.36561e-17	611	RECK/A2M/SYDE1/S1PR1/ARHGAP31/TIMP2/PREX2/PDGFRB/SLIT2/HTR2A/PRKD1/EDNRA/PAPLN/STARD8/DLC1/CD200/FBLN1/ARHGAP20/LPAR1/ARHGEF15/ARHGEF6/TIMP3/ITIH5/HGF/MEF2C/PRKG1/ANTXR1/THY1/LEPR/C4A/COL6A3/NRP1/PCOLCE/ATP1B2/RASIP1/ADAP2/PPM1F/CNN3/RGS5/FAM13B/EPHA3/MAGI2/ROBO1/TBC1D19/ARHGAP22/FGD5/PDGFRA/NOD1/CCN2/GNAI2/GSN/DOCK11/LRP1/GNAO1/FYN/NUAK1/TOR1AIP1/F2R/RIN3/NMUR1/CRIM1/FGF2/GIT2/C4B/MARF1/SPRY1/SF…	BP
positive regulation of biosynthetic process	918/7182	1842/17910	2.79403e-19	1.95764e-17	1.46367e-17	918	ERG/ZEB2/RBMS3/S1PR1/TCF4/NDN/NR3C1/NR2F1/DCN/PKD2/PDGFRB/GLI1/HTR2A/TCF21/MAP3K12/HEYL/ENG/C1QTNF2/LUM/MDFIC/PRKD1/ZFPM2/MEOX2/ZNF423/FZD4/DAB2/APBB1/TGFB3/MAF/GREM1/RHOQ/EBF3/AR/GLIS2/HGF/MEF2C/GLI3/ZEB1/PRRX1/WWTR1/GLI2/CREBL2/FLI1/FGF7/STAT5B/RORA/ACVRL1/NFIA/ELK3/MAFB/CREBRF/KLF7/VIM/ROR2/FZD1/CALCOCO1/FOXF1/PBX1/STING1/SKI/SOX17/BMPR2/MEIS1/CCN2/EPAS1/PRMT2/PBX3/MEF2D/HCFC2/NOTCH3/SMARCD3/M…	BP
cell death	1066/7182	2178/17910	3.00226e-19	2.08996e-17	1.5626e-17	1066	PDE1A/SEPTIN4/TEK/HIC1/NR3C1/IL6ST/CD34/RAMP3/MAGEH1/PMP22/PDGFRB/SLIT2/TNFSF12/ITPR1/HTR2A/MAP3K12/GIMAP8/RAMP2/CYP1B1/PRKD1/ZFPM2/DLC1/CD200/ARHGEF17/SERPINF1/PTGIS/DAB2/LPAR1/APBB1/RASGRF2/TGFB3/BACE1/NFATC4/GREM1/ARHGEF6/TIMP3/AR/ECSCR/SLIT3/HGF/MEF2C/GLI3/GLI2/PTGFR/CAMK1D/PEA15/STAT5B/SGCD/CLIP3/FRZB/RPS6KA2/NRP1/CALHM2/ADARB1/KANK2/RNF130/ANGPT1/PPM1F/SRPX/RILPL1/FZD1/NOTCH2/BCL2/PTGER3/ST…	BP
cellular response to growth factor stimulus	383/7182	674/17910	3.32444e-19	2.29941e-17	1.7192e-17	383	FSTL1/ADGRA2/NDN/MMRN2/NR3C1/LRRC32/DCN/EMILIN1/LDLRAD4/PDGFRB/LTBP1/SLIT2/FBN1/VEGFC/HEYL/ENG/RAMP2/FLRT2/PRKD1/ZNF423/LTBP2/FZD4/DAB2/TGFB3/CDH5/DOK5/GREM1/HGF/MEF2C/ZEB1/FAT4/FAM20C/FGF7/STAT5B/FEZ1/ACVRL1/RBFOX2/NRP1/DKK3/PDE2A/ASPN/COL4A2/ROR2/FZD1/MAGI2/ROBO1/SKI/FERMT2/MAP1B/BMPR2/SPARC/TGFBR2/PDGFRA/CCN2/FLT4/LTBP4/CHRDL1/TGFB1I1/GAB1/FYN/GDF6/SFRP4/FGF2/SMOC2/TGFB1/TWSG1/FGF1/SPRY1/SFRP1…	BP
taxis	324/7182	553/17910	4.20116e-19	2.88729e-17	2.15874e-17	324	ADGRA2/S1PR1/CNTN4/JAM3/LAMA2/PTPRM/BOC/PDGFRB/SLIT2/VEGFC/DOK6/FLRT2/PRKD1/LPAR1/CYSLTR1/DOK5/GREM1/ECSCR/SLIT3/HGF/GLI3/GLI2/CAMK1D/FGF7/FEZ1/PARVA/NRP1/CYP7B1/KLF7/ANGPT1/PPM1F/CH25H/CMTM3/ROBO1/THBS4/CSF1R/MYH10/CXCL12/SHANK3/BMPR2/PDGFRA/LAMB2/GPR183/LRP1/GAB1/FYN/ITGA9/SCN1B/VEGFB/FGF2/SMOC2/TGFB1/RARRES2/FGF1/EVL/DYSF/EDNRB/PIP5K1C/PIK3R1/PLXNA4/DPYSL2/NRP2/GAS6/SEMA6C/GFRA2/THBS1/ITGA1/FG…	BP
chemotaxis	323/7182	551/17910	4.26777e-19	2.91451e-17	2.1791e-17	323	ADGRA2/S1PR1/CNTN4/JAM3/LAMA2/PTPRM/BOC/PDGFRB/SLIT2/VEGFC/DOK6/FLRT2/PRKD1/LPAR1/CYSLTR1/DOK5/GREM1/ECSCR/SLIT3/HGF/GLI3/GLI2/CAMK1D/FGF7/FEZ1/PARVA/NRP1/CYP7B1/KLF7/ANGPT1/PPM1F/CH25H/CMTM3/ROBO1/THBS4/CSF1R/MYH10/CXCL12/SHANK3/BMPR2/PDGFRA/LAMB2/GPR183/LRP1/GAB1/FYN/ITGA9/SCN1B/VEGFB/FGF2/SMOC2/TGFB1/RARRES2/FGF1/EVL/DYSF/EDNRB/PIP5K1C/PIK3R1/PLXNA4/DPYSL2/NRP2/GAS6/SEMA6C/GFRA2/THBS1/ITGA1/FG…	BP
cellular macromolecule biosynthetic process	2113/7182	4634/17910	5.92903e-19	4.02354e-17	3.00828e-17	2113	ERG/ZEB2/FSTL1/QKI/RBMS3/MAN1C1/MAPK10/S1PR1/TCF4/NDN/GAS7/ZNF521/HIC1/NR3C1/ZBTB47/GGT5/JAZF1/NR2F1/DCN/BHLHE22/PKD2/PDGFRB/GLI1/FBN1/CSGALNACT2/TCF21/MAP3K12/SETBP1/HEYL/ENG/POU6F1/C1QTNF2/LUM/PKNOX2/BNC2/PRICKLE1/ZNF135/MDFIC/CYP1B1/PRKD1/RUNX1T1/ZFPM2/CAVIN1/MEOX2/ZNF423/DDR2/DACT1/CD200/FOXN3/PTGIS/FZD4/IGFBP5/DAB2/TCEAL7/ZBTB4/ZNF25/GALNT16/APBB1/TGFB3/LZTS1/AEBP1/NFATC4/MAF/GREM1/EFEMP1/RH…	BP
establishment of localization	2226/7182	4908/17910	9.29397e-19	6.26762e-17	4.68612e-17	2226	FBLN5/ATP8B2/A2M/QKI/MAPK10/CLIC2/TIMP2/LRRC32/CD34/RAMP3/RFTN2/PECAM1/PKD2/PDGFRB/ABCA6/SCN4B/ITPR1/VEGFC/SELP/SLC9A9/HTR2A/SERPING1/DLG4/ENG/COPZ2/C1QTNF2/RAMP2/PRICKLE1/MDFIC/PRKD1/KCNT2/DENND5A/EDNRA/KCNE4/CAVIN1/ISLR/CD302/LTBP2/RAB31/CRISPLD2/CD200/NLGN2/SYT11/FZD4/ARSB/KCNJ8/DAB2/REM1/CYSLTR1/PLEKHO2/APBB1/KCND1/SLC24A3/TGFB3/COLEC12/MAP1A/EHD2/BACE1/SSC5D/CYTH3/GREM1/MARCHF2/RHOQ/TRPC1/CY…	BP
MAPK cascade	480/7182	882/17910	9.45416e-19	6.33605e-17	4.73728e-17	480	ZEB2/MAPK10/TEK/MAP3K3/TIMP2/RAMP3/EMILIN1/PDGFRB/HTR2A/MAP3K12/DLG4/C1QTNF2/MDFIC/DACT1/FBLN1/FZD4/SH2D3C/LPAR1/IL3RA/RASGRF2/TGFB3/DOK5/ARHGEF6/TIMP3/AR/HGF/MEF2C/IGFBP4/SH3RF3/PEA15/FGF7/NRP1/ANGPT1/GLIPR2/PDE5A/ROR2/NOTCH2/ROBO1/CSF1R/SHANK3/NRK/PDGFRA/NOD1/CCN2/GNAI2/PJA2/FLT4/GPR183/GHR/LRP1/FYN/LMO3/SMPD1/CD81/F2R/GDF6/MEF2A/FGF2/LBH/CDON/TGFB1/FGF1/SPRY1/SFRP1/SH2B3/PRKN/ABL1/SFRP2/GAS6/C…	BP
positive regulation of RNA metabolic process	777/7182	1532/17910	9.95105e-19	6.62789e-17	4.95548e-17	777	ERG/ZEB2/S1PR1/TCF4/NDN/NR3C1/NR2F1/DCN/PKD2/GLI1/TCF21/MAP3K12/HEYL/ENG/LUM/MDFIC/PRKD1/ZFPM2/MEOX2/ZNF423/FZD4/DAB2/APBB1/TGFB3/MAF/GREM1/RHOQ/EBF3/AR/GLIS2/HGF/MEF2C/GLI3/ZEB1/PRRX1/WWTR1/GLI2/CREBL2/FLI1/FGF7/STAT5B/RORA/ACVRL1/NFIA/ELK3/MAFB/CREBRF/KLF7/ROR2/FZD1/CALCOCO1/FOXF1/PBX1/STING1/SKI/SOX17/BMPR2/MEIS1/EPAS1/PRMT2/PBX3/MEF2D/FTO/HCFC2/NOTCH3/SMARCD3/MEIS3/TGFB1I1/EZH1/CD81/F2R/SMO/J…	BP
heterocycle biosynthetic process	1882/7182	4089/17910	1.14363e-18	7.57039e-17	5.66016e-17	1882	PDE1A/ERG/ZEB2/FSTL1/MAPK10/S1PR1/TCF4/NDN/GAS7/ZNF521/HIC1/NR3C1/GUCY1B1/ZBTB47/GUCY1A1/JAZF1/NR2F1/DCN/BHLHE22/PKD2/PDGFRB/GLI1/FBN1/HTR2A/TCF21/MAP3K12/SETBP1/HEYL/ENG/POU6F1/NPR2/LUM/PKNOX2/BEND6/BNC2/PRICKLE1/ZNF135/MDFIC/CYP1B1/PRKD1/RUNX1T1/ZFPM2/CAVIN1/MEOX2/ZNF423/DDR2/DACT1/CD200/FOXN3/PTGIS/FZD4/DAB2/TCEAL7/ZBTB4/ZNF25/APBB1/TGFB3/LZTS1/AEBP1/NFATC4/MAF/GREM1/EFEMP1/RHOQ/ZNF362/EID1/EB…	BP
cell junction organization	183/7182	277/17910	1.37176e-18	9.02518e-17	6.74786e-17	183	TEK/HEG1/CDH11/RAMP2/DLC1/NLGN2/TGFB3/CDH5/GREM1/GJA4/ACVRL1/THY1/NRP1/CNTNAP1/PPM1F/ANK2/EPHA3/BCL2/FERMT2/CSF1R/TNS1/ADD1/GJA5/PEAK1/GPBAR1/TLN1/LRP1/PRKCH/NUMBL/CADM3/F2R/TGFB1/RAB8B/SFRP1/PHLDB2/GJC1/MYO9A/PIP5K1C/ABL1/THBS1/LIMS2/FAM107A/IQSEC1/MACF1/ILK/DUSP3/RASSF8/APOD/KDR/COL16A1/HDAC7/ACTN1/MAPRE2/SORBS1/EPB41L3/FLNA/DAPK3/VCL/LAMC1/RAPGEF1/NFASC/CLDN5/RDX/ARHGAP6/GPM6B/RAP1A/PRKACA/LDB…	BP
signal transduction by protein phosphorylation	481/7182	886/17910	1.61173e-18	1.05398e-16	7.88027e-17	481	ZEB2/MAPK10/TEK/MAP3K3/TIMP2/RAMP3/EMILIN1/PDGFRB/HTR2A/MAP3K12/DLG4/C1QTNF2/MDFIC/DACT1/FBLN1/FZD4/SH2D3C/LPAR1/IL3RA/RASGRF2/TGFB3/DOK5/ARHGEF6/TIMP3/AR/HGF/MEF2C/IGFBP4/SH3RF3/PEA15/FGF7/NRP1/ANGPT1/GLIPR2/PDE5A/ROR2/NOTCH2/ROBO1/CSF1R/SHANK3/NRK/PDGFRA/NOD1/CCN2/GNAI2/PJA2/FLT4/GPR183/GHR/LRP1/FYN/LMO3/SMPD1/CD81/F2R/GDF6/MEF2A/FGF2/LBH/CDON/TGFB1/FGF1/SPRY1/SFRP1/SH2B3/PRKN/ABL1/SFRP2/GAS6/C…	BP
mitotic cell cycle process	448/7182	816/17910	1.7845e-18	1.15993e-16	8.67244e-17	448	FBXL7/PKD2/PDGFRB/DACT1/FOXN3/LZTS1/EML1/KANK2/BCL2/PBX1/TUBA1A/MYH10/PRMT2/SMARCD3/SUN2/UBE2E2/LATS2/PKD1/ADAMTS1/TGFB1/CTDSP2/SPRY1/ANKRD53/TACC1/SNX18/KLF11/FAM107A/MAP4/PRKCB/KLHDC8B/FGFR1/CCL2/SEPTIN7/FHL1/NEK9/RHOB/IGF1/CCDC8/FGF10/FLNA/MAP9/DAPK3/CKS2/GNAI1/HSPA2/MECP2/GPNMB/ZWINT/RDX/PRKAR2B/CEP126/PPP1R12B/ITGB1/DUSP1/NACC2/PRKACA/ZFP36L1/WNT9A/FBXO31/POC1A/PAFAH1B1/CDK1/CD28/AIF1/MAP3K2…	BP
positive regulation of nucleic acid-templated transcription	740/7182	1453/17910	2.06169e-18	1.33207e-16	9.95952e-17	740	ERG/ZEB2/S1PR1/TCF4/NDN/NR3C1/NR2F1/DCN/PKD2/GLI1/TCF21/MAP3K12/HEYL/ENG/LUM/MDFIC/PRKD1/ZFPM2/MEOX2/ZNF423/FZD4/DAB2/APBB1/TGFB3/MAF/GREM1/RHOQ/EBF3/AR/GLIS2/HGF/MEF2C/GLI3/ZEB1/PRRX1/WWTR1/GLI2/CREBL2/FLI1/FGF7/STAT5B/RORA/ACVRL1/NFIA/ELK3/MAFB/CREBRF/KLF7/ROR2/FZD1/CALCOCO1/FOXF1/PBX1/STING1/SKI/SOX17/BMPR2/MEIS1/EPAS1/PRMT2/PBX3/MEF2D/HCFC2/NOTCH3/SMARCD3/MEIS3/TGFB1I1/EZH1/CD81/F2R/SMO/JMY/G…	BP
regulation of GTPase activity	251/7182	410/17910	2.27151e-18	1.4589e-16	1.09078e-16	251	SYDE1/S1PR1/ARHGAP31/PREX2/SLIT2/STARD8/DLC1/ARHGAP20/ARHGEF15/ARHGEF6/PRKG1/THY1/NRP1/RASIP1/ADAP2/RGS5/FAM13B/EPHA3/TBC1D19/ARHGAP22/FGD5/DOCK11/GNAO1/F2R/RIN3/GIT2/SPRY1/SFRP1/MYO9A/SNX18/LRRK2/ARHGAP15/SYNGAP1/IQSEC1/FGD1/ARHGAP10/ARHGAP24/RASA3/GNB5/MAPRE2/STARD13/PREX1/RSU1/DOCK4/ARHGAP29/ARHGAP1/DOCK10/ASAP3/MYO9B/RAPGEF1/RGS4/RDX/ASAP1/ITGB1/ARHGAP6/SEC23A/BVES/ADCYAP1/RAP1A/GPR65/RGS2/BN…	BP
aromatic compound biosynthetic process	1884/7182	4099/17910	2.30905e-18	1.47424e-16	1.10225e-16	1884	PDE1A/ERG/ZEB2/FSTL1/MAPK10/S1PR1/TCF4/NDN/GAS7/ZNF521/HIC1/NR3C1/GUCY1B1/ZBTB47/GUCY1A1/JAZF1/NR2F1/DCN/BHLHE22/PKD2/PDGFRB/GLI1/FBN1/HTR2A/TCF21/MAP3K12/SETBP1/HEYL/ENG/POU6F1/NPR2/LUM/PKNOX2/BEND6/BNC2/PRICKLE1/ZNF135/MDFIC/CYP1B1/PRKD1/RUNX1T1/ZFPM2/CAVIN1/MEOX2/ZNF423/DDR2/DACT1/CD200/FOXN3/PTGIS/FZD4/DAB2/TCEAL7/ZBTB4/ZNF25/APBB1/TGFB3/LZTS1/AEBP1/NFATC4/MAF/GREM1/EFEMP1/RHOQ/TRPC1/ZNF362/E…	BP
positive regulation of RNA biosynthetic process	740/7182	1454/17910	2.5611e-18	1.62317e-16	1.2136e-16	740	ERG/ZEB2/S1PR1/TCF4/NDN/NR3C1/NR2F1/DCN/PKD2/GLI1/TCF21/MAP3K12/HEYL/ENG/LUM/MDFIC/PRKD1/ZFPM2/MEOX2/ZNF423/FZD4/DAB2/APBB1/TGFB3/MAF/GREM1/RHOQ/EBF3/AR/GLIS2/HGF/MEF2C/GLI3/ZEB1/PRRX1/WWTR1/GLI2/CREBL2/FLI1/FGF7/STAT5B/RORA/ACVRL1/NFIA/ELK3/MAFB/CREBRF/KLF7/ROR2/FZD1/CALCOCO1/FOXF1/PBX1/STING1/SKI/SOX17/BMPR2/MEIS1/EPAS1/PRMT2/PBX3/MEF2D/HCFC2/NOTCH3/SMARCD3/MEIS3/TGFB1I1/EZH1/CD81/F2R/SMO/JMY/G…	BP
regulation of immune system process	792/7182	1570/17910	2.5724e-18	1.62317e-16	1.2136e-16	792	A2M/C1S/C1R/MAPK10/LRRC32/IL6ST/JAM3/CD34/EMILIN1/SLIT2/FBN1/VEGFC/SELP/SERPING1/IL1R1/CD200/TGFB3/COLEC12/GREM1/MEF2C/GLI3/ZEB1/GLI2/CAMK1D/C1RL/STAT5B/RORA/THY1/C4A/RBFOX2/MAFB/ANGPT1/PDE5A/MSN/ROR2/CTSK/NOTCH2/CMTM3/FOXF1/BCL2/IL34/C7/STING1/THBS4/CXCL12/TRIL/TGFBR2/NOD1/LRRC17/MEIS1/PJA2/GSN/GPR183/PRKCH/FYN/CD81/ADGRF5/HLX/WIPF1/CD99L2/TGFB1/RARRES2/TWSG1/DYSF/C4B/SFRP1/LOXL3/SOCS5/MITF/PIK3…	BP
regulation of plasma membrane bounded cell projection organization	356/7182	624/17910	2.6949e-18	1.68597e-16	1.26055e-16	356	ZEB2/NR2F1/PMP22/SLIT2/DLG4/PRKD1/DENND5A/SDC2/SERPINF1/FZD4/ARSB/LPAR1/APBB1/TGFB3/SPART/LZTS1/NFATC4/RHOQ/HGF/MEF2C/PRRX1/ISLR2/PALM/CAMK1D/FEZ1/THY1/NRP1/DPYSL3/NAV3/DZIP1/VIM/FZD1/EPHA3/MAGI2/NLGN3/ROBO1/MAP1B/CXCL12/SHANK3/BMPR2/NEGR1/DOCK11/LRP1/FYN/SCN1B/SEMA3G/EVL/TRAK2/RGMA/SFRP1/MYO9A/PRKN/ABL1/PLXNA4/SFRP2/DPYSL2/MAP4/LRRK2/SYNGAP1/P2RX7/FGFR1/FCGR2B/SEPTIN7/MACF1/ILK/CRMP1/CRTC1/PTN/N…	BP
nucleobase-containing compound biosynthetic process	1854/7182	4029/17910	2.70318e-18	1.68597e-16	1.26055e-16	1854	PDE1A/ERG/ZEB2/FSTL1/MAPK10/S1PR1/TCF4/NDN/GAS7/ZNF521/HIC1/NR3C1/GUCY1B1/ZBTB47/GUCY1A1/JAZF1/NR2F1/DCN/BHLHE22/PKD2/PDGFRB/GLI1/FBN1/HTR2A/TCF21/MAP3K12/SETBP1/HEYL/ENG/POU6F1/NPR2/LUM/PKNOX2/BEND6/BNC2/PRICKLE1/ZNF135/MDFIC/CYP1B1/PRKD1/RUNX1T1/ZFPM2/CAVIN1/MEOX2/ZNF423/DDR2/DACT1/CD200/FOXN3/PTGIS/FZD4/DAB2/TCEAL7/ZBTB4/ZNF25/APBB1/TGFB3/LZTS1/AEBP1/NFATC4/MAF/GREM1/EFEMP1/RHOQ/ZNF362/EID1/EB…	BP
growth	509/7182	948/17910	2.74138e-18	1.69997e-16	1.27102e-16	509	FBLN5/ZEB2/IGFBP7/S1PR1/NDN/TNS2/EVC/HEG1/PDGFRB/SLIT2/GLI1/CPQ/BNC2/ZFPM2/DDR2/IGFBP5/APBB1/THBS3/SPART/GREM1/AR/SLIT3/MEF2C/GLI3/IGFBP4/WWTR1/ISLR2/GLI2/FGF7/STAT5B/CLIC4/ACVRL1/LEPR/FRZB/NRP1/WWC3/TENM4/RERG/ADARB1/PPM1F/NOTCH2/BCL2/MAGI2/FOXS1/NLGN3/MAP1B/SOX17/CXCL12/BMPR2/NRK/TGFBR2/MEIS1/ADD1/PRMT2/LTBP4/LAMB2/GSN/FTO/GHR/LRP1/CLSTN3/SH3PXD2B/NPR1/SELENOM/CD81/SMO/HLX/SEMA3G/FGF2/TGFB1/FGF…	BP
organic cyclic compound biosynthetic process	1942/7182	4239/17910	3.07519e-18	1.89607e-16	1.41764e-16	1942	PDE1A/ERG/ZEB2/IGFBP7/FSTL1/MAPK10/S1PR1/TCF4/NDN/GAS7/ZNF521/HIC1/NR3C1/GUCY1B1/ZBTB47/GUCY1A1/JAZF1/NR2F1/DCN/BHLHE22/PKD2/PDGFRB/GLI1/FBN1/HTR2A/TCF21/MAP3K12/SETBP1/HEYL/ENG/POU6F1/NPR2/LUM/PKNOX2/BEND6/BNC2/PRICKLE1/ZNF135/MDFIC/CYP1B1/PRKD1/RUNX1T1/ZFPM2/CAVIN1/MEOX2/ZNF423/DDR2/DACT1/CD200/FOXN3/PTGIS/FZD4/DAB2/TCEAL7/ZBTB4/ZNF25/APBB1/DHH/TGFB3/LZTS1/AEBP1/NFATC4/MAF/GREM1/EFEMP1/RHOQ/TRP…	BP
cell division	332/7182	575/17910	3.35063e-18	2.05416e-16	1.53584e-16	332	FBXL7/TTC28/NR3C1/VEGFC/HMCN1/TGFB3/SPART/WWTR1/FGF7/THBS4/TUBA1A/SOX17/MYH10/GNAI2/PARD3B/NUMBL/LATS2/TXNIP/VEGFB/FGF2/LBH/TGFB1/FGF1/NAP1L2/ANKRD53/TACC1/SFRP2/PDGFC/SNX18/MAP4/DIXDC1/KLHDC8B/FGFR1/PTN/NEK9/RHOB/MAPRE2/MAP9/NEK1/SVIL/CKS2/GNAI1/ZBTB16/MYH9/ZWINT/KDF1/FZD7/PDGFD/UVRAG/EPB41L2/TAL1/RAB11FIP3/SOX5/KIT/SPECC1L/PAFAH1B1/CDK1/SNX33/PTTG1/HTR2B/CCNB1/KLHL13/MAD2L1/RBL2/SH3GLB1/LZTS2/C…	BP
regulation of nucleobase-containing compound metabolic process	1779/7182	3853/17910	3.37919e-18	2.05997e-16	1.54018e-16	1779	ERG/ZEB2/FSTL1/MAPK10/S1PR1/TCF4/NDN/GAS7/ZNF521/HIC1/NR3C1/ZBTB47/JAZF1/NR2F1/DCN/BHLHE22/PKD2/PDGFRB/GLI1/FBN1/HTR2A/TCF21/MAP3K12/SETBP1/HEYL/ENG/POU6F1/LUM/PKNOX2/BEND6/BNC2/PRICKLE1/ZNF135/MDFIC/CYP1B1/PRKD1/RUNX1T1/ZFPM2/MEOX2/ZNF423/DDR2/DACT1/CD200/FOXN3/PTGIS/FZD4/DAB2/TCEAL7/ZBTB4/ZNF25/APBB1/TGFB3/LZTS1/AEBP1/FAM172A/NFATC4/MAF/GREM1/EFEMP1/RHOQ/ZNF362/EID1/EBF3/ZNF333/AR/GLIS2/HGF/MEF…	BP
programmed cell death	1003/7182	2049/17910	4.20574e-18	2.54944e-16	1.90614e-16	1003	PDE1A/SEPTIN4/TEK/HIC1/NR3C1/IL6ST/MAGEH1/PDGFRB/SLIT2/TNFSF12/ITPR1/MAP3K12/GIMAP8/RAMP2/CYP1B1/PRKD1/DLC1/ARHGEF17/PTGIS/DAB2/LPAR1/APBB1/RASGRF2/TGFB3/BACE1/NFATC4/GREM1/ARHGEF6/TIMP3/AR/ECSCR/SLIT3/HGF/MEF2C/GLI3/GLI2/PTGFR/CAMK1D/PEA15/STAT5B/CLIP3/FRZB/RPS6KA2/NRP1/CALHM2/ADARB1/KANK2/RNF130/ANGPT1/PPM1F/SRPX/NOTCH2/BCL2/STING1/ROBO1/CSF1R/CXCL12/TWIST2/BMPR2/TGFBR2/NOD1/CCN2/GNAI2/PRMT2/FL…	BP
regulation of cell projection organization	360/7182	634/17910	4.80327e-18	2.89538e-16	2.16479e-16	360	ZEB2/NR2F1/PMP22/SLIT2/DLG4/PRKD1/DENND5A/SDC2/SERPINF1/FZD4/ARSB/LPAR1/APBB1/TGFB3/SPART/LZTS1/NFATC4/RHOQ/HGF/MEF2C/PRRX1/ISLR2/PALM/CAMK1D/FEZ1/THY1/NRP1/DPYSL3/NAV3/DZIP1/VIM/FZD1/EPHA3/MAGI2/NLGN3/ROBO1/MAP1B/CXCL12/SHANK3/BMPR2/NEGR1/DOCK11/LRP1/FYN/SCN1B/SEMA3G/EVL/TRAK2/RGMA/RAB8B/SFRP1/MYO9A/PRKN/ABL1/PLXNA4/SFRP2/DPYSL2/MAP4/LRRK2/SYNGAP1/P2RX7/FGFR1/FCGR2B/SEPTIN7/MACF1/ILK/CRMP1/CRTC1…	BP
protein-containing complex subunit organization	995/7182	2032/17910	5.2427e-18	3.14271e-16	2.34971e-16	995	FBXL7/NAP1L3/SEPTIN4/TEK/TCF4/ELN/EMILIN1/PKD2/LDLRAD4/KIRREL1/SLIT2/SELP/DLG4/COL14A1/C1QTNF2/LUM/CYP1B1/DDR2/DACT1/SYT11/KCTD12/KCTD10/COL6A2/KCND1/COLEC12/AEBP1/GREM1/MAP7D3/AR/STOM/TSPAN4/ANXA6/CELF2/LRRC8C/CLIP3/DPYSL3/F8/NAV3/RASIP1/ANGPT1/MSN/FZD1/MAGI2/TTBK2/HDGFL3/VWF/NCKAP5L/STING1/SKI/FERMT2/MAP1B/CXCL12/TRABD2B/MYADM/NOD1/ADD1/GJA5/GSN/TLN1/TLE4/SMARCD3/NAP1L5/BMERB1/FCHSD2/SH3PXD2B/T…	BP
establishment of localization in cell	945/7182	1919/17910	5.91323e-18	3.52507e-16	2.63559e-16	945	MAPK10/CLIC2/RAMP3/PKD2/ITPR1/HTR2A/COPZ2/RAMP2/PRICKLE1/MDFIC/DENND5A/LTBP2/NLGN2/SYT11/DAB2/MAP1A/EHD2/BACE1/TRPC1/MEF2C/GLI3/STOM/NRXN2/FEZ1/GPRASP1/THY1/SYNDIG1/F8/LEPROT/KLF7/GEM/TUB/ANGPT1/DYNC2H1/MSN/ANK2/RILPL1/PKIG/FOXF1/BCL2/MAGI2/NLGN3/ATXN1/MAP1B/TUBA1A/MYH10/APLNR/LRP1/FYN/SUN2/CD81/F2R/SMO/DENND2A/ADCY5/PKD1/TXNIP/FGF2/TGFB1/TRAK2/SPRY1/RIPOR1/AP1M1/RAB8B/VPS35L/ANKRD53/SNX1/PIP5K1C…	BP
regulation of cell development	482/7182	893/17910	6.32486e-18	3.74974e-16	2.80357e-16	482	RECK/ZEB2/ADGRA2/TCF4/TIMP2/CNTN4/IL6ST/NR2F1/PMP22/SLIT2/FBN1/VEGFC/HEYL/DLG4/NPR2/BEND6/FLRT2/PRKD1/DENND5A/SDC2/FBLN1/SERPINF1/FZD4/ARSB/S1PR3/LPAR1/APBB1/SPART/LZTS1/CDH5/NFATC4/HGF/MEF2C/GLI3/ZEB1/PRRX1/ISLR2/GLI2/CAMK1D/FEZ1/DAAM2/THY1/FRZB/NRP1/TENM4/DPYSL3/PDE5A/VIM/FZD1/NOTCH2/EPHA3/BCL2/MAGI2/IL34/PBX1/NLGN3/ROBO1/SKI/MAP1B/CXCL12/SHANK3/BMPR2/MYADM/NEGR1/MEIS1/ADD1/GPR183/NOTCH3/SMARCD…	BP
positive regulation of protein kinase activity	295/7182	501/17910	6.45457e-18	3.80573e-16	2.84543e-16	295	ZEB2/MAPK10/MAP3K3/PKD2/PDGFRB/HTR2A/MAP3K12/DLG4/C1QTNF2/MDFIC/DDR2/FZD4/LPAR1/TGFB3/GREM1/HGF/PEA15/ANGPT1/PDE5A/ROR2/ADCY4/ROBO1/CSF1R/NRK/TGFBR2/NOD1/ADCY9/GHR/FYN/CD81/F2R/ADCY5/PKD1/FGF2/TGFB1/FGF1/ABL1/PDGFC/GAS6/THBS1/ITGA1/LRRK2/PINK1/P2RX7/FGFR1/CSF1/ILK/SASH1/NGF/IGF1/RASSF2/ATP2B4/FZD8/ITGB3/PRKACB/FGF10/NOX4/CKS2/CCN1/CSPG4/RAPGEF1/SHC2/PRKAR2B/MAPK11/PIK3R5/PIK3R6/ADCYAP1/RAP1A/PRKA…	BP
positive regulation of intracellular signal transduction	540/7182	1019/17910	7.88539e-18	4.6241e-16	3.4573e-16	540	ZEB2/SEPTIN4/MAPK10/TEK/MAP3K3/TIMP2/HIC1/IL6ST/GUCY1A1/DCN/RAMP3/PECAM1/PKD2/PDGFRB/AKT3/SELP/HTR2A/MAP3K12/ENG/NPR2/C1QTNF2/MDFIC/CYP1B1/PRKD1/FZD4/IGFBP5/LPAR1/TGFB3/DOK5/GREM1/AR/HGF/IGFBP4/LURAP1/SH3RF3/PEA15/FGF7/NRP1/ANGPT1/GLIPR2/PDE5A/ROR2/NOTCH2/BCL2/ROBO1/CSF1R/NRK/MID2/PDGFRA/NOD1/CCN2/GNAI2/PJA2/FLT4/GPR183/GHR/MEIS3/LRP1/C1QTNF4/NPR1/GAB1/FYN/CD81/F2R/GDF6/ARL2BP/FGF2/CDON/TGFB1/GUC…	BP
positive regulation of hydrolase activity	383/7182	684/17910	9.10124e-18	5.30824e-16	3.96882e-16	383	SYDE1/S1PR1/ARHGAP31/PREX2/PDGFRB/HTR2A/PRKD1/EDNRA/STARD8/DLC1/CD200/FBLN1/ARHGAP20/LPAR1/ARHGEF15/ARHGEF6/MEF2C/ANTXR1/THY1/NRP1/PCOLCE/ATP1B2/ADAP2/PPM1F/RGS5/FAM13B/MAGI2/ROBO1/TBC1D19/ARHGAP22/PDGFRA/NOD1/CCN2/GSN/DOCK11/GNAO1/FYN/TOR1AIP1/F2R/RIN3/NMUR1/FGF2/GIT2/SFRP1/MYO9A/SFRP2/DNAJB4/SNX18/RASGRP4/HIP1/ITGA1/LRRK2/ARHGAP15/SYNGAP1/PINK1/IQSEC1/FGFR1/ARHGAP10/ARHGAP24/NLRP1/NGF/RASA3/P2R…	BP
cellular nitrogen compound biosynthetic process	2146/7182	4735/17910	9.59944e-18	5.56871e-16	4.16356e-16	2146	PDE1A/ERG/ZEB2/FSTL1/QKI/RBMS3/MAPK10/S1PR1/TCF4/NDN/GAS7/ZNF521/HIC1/NR3C1/GUCY1B1/ZBTB47/GGT5/GUCY1A1/JAZF1/NR2F1/DCN/BHLHE22/CD34/PKD2/PDGFRB/GLI1/FBN1/HTR2A/TCF21/MAP3K12/SETBP1/HEYL/ENG/POU6F1/NPR2/LUM/PKNOX2/BEND6/BNC2/PRICKLE1/ZNF135/MDFIC/CYP1B1/PRKD1/RUNX1T1/ZFPM2/CAVIN1/MEOX2/ZNF423/DDR2/DACT1/CD200/FOXN3/PTGIS/FZD4/IGFBP5/DAB2/TCEAL7/ZBTB4/ZNF25/APBB1/TGFB3/LZTS1/AEBP1/NFATC4/MAF/GREM1…	BP
angiogenesis	331/7182	576/17910	1.00244e-17	5.78416e-16	4.32465e-16	331	RECK/ADGRA2/TEK/S1PR1/MAP3K3/CLEC14A/MMRN2/JAM3/DCN/COL8A1/CD34/PECAM1/PTPRM/EMILIN1/PDGFRB/AKT3/SLIT2/TNFSF12/COL8A2/TCF21/RHOJ/ENG/RAMP2/CYP1B1/PRKD1/TIE1/EDNRA/MEOX2/TBXA2R/SERPINF1/PTGIS/CDH5/PLXDC1/NFATC4/GREM1/STAB1/ECSCR/HGF/COL15A1/RSPO3/RORA/ACVRL1/FMNL3/THY1/LEPR/PARVA/NRP1/MCAM/ELK3/RASIP1/MFGE8/ANGPT1/COL4A2/VASH1/THSD7A/ROBO1/THBS4/HSPG2/SOX17/APLNR/ARHGAP22/SPARC/TGFBR2/PDGFRA/PTPRB…	BP
cellular component disassembly	290/7182	492/17910	1.01655e-17	5.83432e-16	4.36215e-16	290	A2M/TIMP2/DDR2/TGFB3/TLL1/NAV3/CTSK/FZD1/TTBK2/HDGFL3/NCKAP5L/STING1/MAP1B/ADD1/GSN/SMARCD3/LRP1/BMERB1/SH3PXD2B/TGFB1/TMOD2/PRKN/TMOD1/ETS1/FYCO1/GABARAPL1/PRKCB/HTRA1/PINK1/DUSP3/MMP2/NEK9/LMOD1/ADAMTS5/C3/FAP/HSPA2/LAMC1/RDX/UVRAG/MAP1LC3C/PLEKHH2/ADRB2/TIMP1/MICAL2/PAFAH1B1/CDK1/SNAI2/CFL2/TGFBR1/PDPN/TPSAB1/AIFM1/ITGAM/DSTN/CCNB1/MMP19/STMN2/SWAP70/SYNJ1/NES/MRPL12/VPS13D/MAP1LC3B/CX3CR1/MMP…	BP
lymphocyte activation	357/7182	630/17910	1.02565e-17	5.85543e-16	4.37793e-16	357	LRRC32/IL6ST/MEF2C/GLI3/ZEB1/GLI2/STAT5B/RORA/THY1/LEPR/MAFB/PDE5A/MSN/NOTCH2/BCL2/TGFBR2/GSN/GPR183/DOCK11/FYN/CD81/HLX/TGFB1/TWSG1/SFRP1/LOXL3/SOCS5/PIK3R1/ABL1/GAS6/PURA/ITM2A/HDAC5/PRKCB/P2RX7/FCGR2B/TNFSF8/CCL2/DUSP3/ZMIZ1/CD1D/IGF1/FZD8/LGALS1/FGF10/PREX1/FGL2/ZBTB16/ITPKB/DOCK10/SATB1/MYH9/GPNMB/AXL/ITGB1/PIK3R6/FZD7/CD1C/ZFP36L1/FOXP1/CYLD/DUSP22/KIT/PIK3CA/CD4/VCAM1/TMEM131L/CD28/TACR1/J…	BP
tissue morphogenesis	359/7182	635/17910	1.3547e-17	7.69329e-16	5.75205e-16	359	ZEB2/S1PR1/HEG1/PKD2/SLIT2/VEGFC/TCF21/HEYL/DCHS1/ENG/GPC6/PRICKLE1/EDNRA/ZFPM2/DACT1/DLC1/FZD4/IGFBP5/DAB2/NFATC4/GREM1/AR/HGF/MEF2C/GLI3/FAT4/GLI2/FGF7/RSPO3/CLIC4/ACVRL1/FRZB/NRP1/CYP7B1/ADARB1/RASIP1/CC2D2A/MSN/ROR2/FZD1/ANKRD6/FOXF1/BCL2/MAGI2/PBX1/ROBO1/SKI/CSF1R/SOX17/BMPR2/TGFBR2/TGFB1I1/PRICKLE2/SMO/ALDH1A3/PKD1/NOTCH4/ACTA2/FGF2/TGFB1/TWSG1/FGF1/COL5A1/SPRY1/SFRP1/PHLDB2/MYO9A/ABL1/SFRP…	BP
transport	2165/7182	4785/17910	1.65988e-17	9.377e-16	7.01091e-16	2165	FBLN5/ATP8B2/A2M/QKI/MAPK10/CLIC2/TIMP2/LRRC32/CD34/RAMP3/RFTN2/PECAM1/PKD2/PDGFRB/ABCA6/SCN4B/ITPR1/VEGFC/SELP/SLC9A9/HTR2A/SERPING1/DLG4/ENG/COPZ2/C1QTNF2/RAMP2/PRICKLE1/MDFIC/PRKD1/KCNT2/DENND5A/EDNRA/KCNE4/CAVIN1/ISLR/CD302/LTBP2/RAB31/CRISPLD2/CD200/NLGN2/SYT11/FZD4/ARSB/KCNJ8/DAB2/REM1/CYSLTR1/PLEKHO2/APBB1/KCND1/SLC24A3/TGFB3/COLEC12/MAP1A/EHD2/BACE1/SSC5D/CYTH3/GREM1/MARCHF2/RHOQ/TRPC1/CY…	BP
regulation of cell morphogenesis	258/7182	429/17910	1.9859e-17	1.11603e-15	8.34425e-16	258	ZEB2/SLIT2/DLG4/ZNF135/DLC1/SDC2/FBLN1/FZD4/LPAR1/SPART/LZTS1/NFATC4/ISLR2/PALM/FMNL3/THY1/PARVA/NRP1/MSN/NLGN3/ROBO1/FERMT2/MAP1B/CSF1R/MYH10/CXCL12/SHANK3/BMPR2/SPARC/MYADM/FGD5/LRP1/WTIP/FYN/PLEKHO1/SEMA3G/TRAK2/ITGA7/MYO9A/PRKN/ABL1/PLXNA4/DPYSL2/GNA12/PALMD/LRRK2/ARHGAP15/SYNGAP1/FGD1/CCL2/SEPTIN7/MACF1/ILK/ATP10A/PTN/KDR/NGF/ULK2/EPB41L3/PREX1/FLNA/DAPK3/SARM1/NTN1/MYH9/RDX/MEGF8/NGFR/BVES/…	BP
negative regulation of signaling	697/7182	1368/17910	2.04367e-17	1.14255e-15	8.54251e-16	697	RBMS3/ADGRA2/CLIC2/TIMP2/MMRN2/HIC1/HEG1/DCN/BICC1/EMILIN1/PKD2/PTGIR/LDLRAD4/LTBP1/SLIT2/GLI1/FBN1/ITPR1/HTR2A/TCF21/HEYL/BEND6/PRICKLE1/RGS7BP/DACT1/DLC1/SYT11/FBLN1/IGFBP5/DAB2/LPAR1/TGFB3/NFATC4/GREM1/TIMP3/MCC/AR/GLIS2/SLIT3/HGF/GLI3/IGFBP4/WWTR1/PALM/PEA15/ZNF366/GPRASP1/RORA/THY1/FRZB/NRP1/WWC3/CYP7B1/DKK3/PDE2A/LEPROT/KANK2/CREBRF/KLF7/ASPN/RASIP1/ROR2/FZD1/RGS5/SESN3/BCL2/MAGI2/NLGN3/ROB…	BP
positive regulation of kinase activity	313/7182	541/17910	2.12803e-17	1.18358e-15	8.8493e-16	313	ZEB2/MAPK10/TEK/MAP3K3/PKD2/PDGFRB/HTR2A/MAP3K12/DLG4/C1QTNF2/MDFIC/PRKD1/DDR2/FZD4/LPAR1/TGFB3/GREM1/HGF/PEA15/ANGPT1/PDE5A/ROR2/ADCY4/ROBO1/CSF1R/NRK/TGFBR2/PDGFRA/NOD1/ADCY9/GHR/FYN/CD81/F2R/ADCY5/PKD1/FGF2/TGFB1/FGF1/ABL1/PDGFC/GAS6/THBS1/ITGA1/LRRK2/PINK1/P2RX7/FGFR1/CSF1/ILK/SASH1/NGF/IGF1/P2RY12/RASSF2/ATP2B4/TNFAIP8L3/FZD8/ITGB3/PRKACB/FGF10/NOX4/ITSN1/CKS2/DSTYK/CCN1/CSPG4/RAPGEF1/SHC2/P…	BP
response to organonitrogen compound	498/7182	932/17910	2.18945e-17	1.2115e-15	9.058e-16	498	TEK/RAMP3/PKD2/SLIT2/FBN1/HTR2A/RAB31/IGFBP5/BACE1/RHOQ/MEF2C/ZEB1/GLP2R/PEA15/STAT5B/PDE2A/LEPROT/VIM/ADCY4/SESN3/MAP1B/CXCL12/SPARC/CDO1/PDGFRA/NOD1/CCN2/ADCY9/GNAI2/GSN/GHR/LRP1/GNAO1/GAB1/FYN/SMPD1/CD81/ADCY5/TGFB1/RARRES2/EDNRB/SFRP1/SOCS5/PDE1B/PRKN/PIK3R1/ABL1/PDE3A/PDGFC/COL6A1/THBD/LDOC1/KLF11/FOLR2/HDAC5/LRRK2/ABCA1/PRKCB/ATP6V1G2/TGFBR3/VAMP2/P2RX7/FCGR2B/RRAGB/NLRP1/MMP2/PTN/COL16A1/S…	BP
positive regulation of cell adhesion	237/7182	388/17910	2.99411e-17	1.64829e-15	1.23238e-15	237	TEK/IL6ST/COL8A1/CCDC80/CYTH3/GLI3/GLI2/NID1/ABI3BP/PLPP3/STAT5B/THY1/NRP1/ANGPT1/PPM1F/FOXF1/CXCL12/MYADM/TGFBR2/FYN/CD81/HLX/SMOC2/ADAM19/TGFB1/DYSF/SFRP1/SOCS5/PIK3R1/ABL1/SFRP2/ETS1/DUSP26/UTRN/CCL2/CSF1/ILK/ZMIZ1/CD1D/PTN/KDR/COL16A1/IGF1/P2RY12/LGALS1/PREX1/FLNA/RSU1/ITGAV/ZBTB16/CITED2/CCN1/ITPKB/PIK3R6/TFE3/ZFHX3/LDB1/CYLD/EDIL3/PIK3CA/CD4/FN1/VCAM1/CD28/CCL19/AIF1/PDPN/EGFLAM/NLRP3/TPM1/…	BP
negative regulation of cell communication	694/7182	1364/17910	3.63653e-17	1.99178e-15	1.4892e-15	694	RBMS3/ADGRA2/CLIC2/TIMP2/MMRN2/HIC1/HEG1/DCN/BICC1/EMILIN1/PKD2/PTGIR/LDLRAD4/LTBP1/SLIT2/GLI1/FBN1/ITPR1/HTR2A/TCF21/HEYL/BEND6/PRICKLE1/RGS7BP/DACT1/DLC1/SYT11/FBLN1/IGFBP5/DAB2/LPAR1/TGFB3/NFATC4/GREM1/TIMP3/MCC/AR/GLIS2/SLIT3/HGF/GLI3/IGFBP4/WWTR1/PALM/PEA15/ZNF366/GPRASP1/RORA/THY1/FRZB/NRP1/WWC3/CYP7B1/DKK3/PDE2A/LEPROT/KANK2/CREBRF/KLF7/ASPN/RASIP1/ROR2/FZD1/RGS5/SESN3/BCL2/MAGI2/NLGN3/ROB…	BP
response to organic cyclic compound	472/7182	878/17910	3.77183e-17	2.05546e-15	1.5368e-15	472	IGFBP7/PLPP1/TEK/NR3C1/NR2F1/RAMP3/RFTN2/PKD2/PDGFRB/SLIT2/HTR2A/TCF21/FIBIN/HEYL/ENG/LUM/RAMP2/CYP1B1/TBXA2R/SERPINF1/IGFBP5/KCNJ8/DAB2/DHH/TGFB3/COLEC12/NFATC4/AR/SLIT3/MEF2C/GLI2/PTGFR/PEA15/ZNF366/STAT5B/RORA/RBFOX2/CYP7B1/PDE2A/KANK2/CREBRF/MSN/CALCOCO1/KLF9/FOXF1/BCL2/STING1/MAP1B/SPARC/CDO1/TGFBR2/CCN2/PRMT2/GSN/GNAO1/TGFB1I1/LMO3/SMPD1/SMO/ADCY5/TXNIP/LBH/TGFB1/NR2F2/EDNRB/SFRP1/PRKN/ABL1…	BP
negative regulation of signal transduction	649/7182	1266/17910	5.40089e-17	2.92842e-15	2.1895e-15	649	RBMS3/ADGRA2/CLIC2/TIMP2/MMRN2/HIC1/HEG1/DCN/BICC1/EMILIN1/PKD2/PTGIR/LDLRAD4/LTBP1/SLIT2/GLI1/FBN1/ITPR1/TCF21/HEYL/BEND6/PRICKLE1/RGS7BP/DACT1/DLC1/FBLN1/IGFBP5/DAB2/LPAR1/TGFB3/NFATC4/GREM1/TIMP3/MCC/AR/GLIS2/SLIT3/HGF/GLI3/IGFBP4/WWTR1/PALM/PEA15/ZNF366/GPRASP1/RORA/THY1/FRZB/NRP1/WWC3/CYP7B1/DKK3/PDE2A/LEPROT/KANK2/CREBRF/ASPN/RASIP1/ROR2/FZD1/RGS5/SESN3/BCL2/MAGI2/NLGN3/ROBO1/SKI/SOX17/APLN…	BP
positive regulation of cell projection organization	223/7182	362/17910	6.57469e-17	3.54704e-15	2.65202e-15	223	ZEB2/SLIT2/DLG4/PRKD1/SERPINF1/FZD4/ARSB/LPAR1/APBB1/TGFB3/RHOQ/HGF/ISLR2/PALM/CAMK1D/FEZ1/NRP1/DPYSL3/NAV3/DZIP1/FZD1/EPHA3/MAGI2/ROBO1/MAP1B/CXCL12/SHANK3/BMPR2/NEGR1/DOCK11/LRP1/FYN/SCN1B/RAB8B/PRKN/P2RX7/FGFR1/SEPTIN7/MACF1/ILK/CRTC1/PTN/NGF/WASF2/P2RY12/ITSN1/CREB3L2/NTN1/SCARF1/P3H1/PPP2R5B/RAPGEF1/NME1/MEGF8/MOB2/NGFR/ADCYAP1/RAP1A/CEP120/RGS2/AMIGO1/FBXO31/FES/KIT/FN1/PAFAH1B1/NIN/CCL19/T…	BP
regulation of cellular localization	464/7182	863/17910	6.87935e-17	3.69295e-15	2.76111e-15	464	CLIC2/RAMP3/PKD2/HTR2A/GPC6/MDFIC/NLGN2/SYT11/DAB2/MAP1A/EHD2/BACE1/RHOQ/TRPC1/AR/GLIS2/MEF2C/GLI3/STOM/FEZ1/THY1/CLIP3/LEPROT/KLF7/ANGPT1/MSN/PPM1F/ANK2/PKIG/EPHA3/FOXF1/BCL2/MAGI2/TTBK2/NLGN3/MAP1B/APLNR/GSN/LRP1/PRKCH/DCLK2/FYN/CD81/F2R/SMO/ADCY5/TGFB1/RIPOR1/PRKN/PIK3R1/ABL1/GAS6/PCDH17/GAS1/SUFU/CRYAB/LRRK2/PRKCB/PINK1/VAMP2/P2RX7/MCTP1/APOD/PTN/GRIK5/SSH1/SLC8A1/CACNB2/ITGB3/SORBS1/PID1/CAC…	BP
response to cytokine	603/7182	1167/17910	9.59561e-17	5.12557e-15	3.83224e-15	603	S1PR1/MAP3K3/NDN/IL6ST/SLIT2/TNFSF12/VEGFC/NPR2/MRAS/IL1R1/LRRC70/PTGIS/FZD4/IL3RA/ACKR1/SLIT3/HGF/ZEB1/STAT5B/RORA/LEPR/CLIP3/DPYSL3/PCOLCE/PDE2A/CREBRF/ANGPT1/VIM/MSN/MSC/FOXF1/BCL2/IL34/ROBO1/CSF1R/SOX17/CXCL12/SPARC/NOD1/GSN/TLE4/GHR/C1QTNF4/NUMBL/GNAO1/FYN/FGF2/TGFB1/PTPN5/EVL/SFRP1/SH2B3/SOCS5/PDE1B/PRKN/PIK3R1/KLHL20/NRP2/GAS6/ETS1/PLVAP/THBS1/IL11RA/RAB12/PRDM5/TNFSF8/CCL2/CSF1/ILK/MMP2/P…	BP
regulation of nervous system development	466/7182	870/17910	1.42734e-16	7.58671e-15	5.67236e-15	466	ZEB2/TCF4/TIMP2/CNTN4/IL6ST/NR2F1/PMP22/SLIT2/GLI1/VEGFC/HEYL/DLG4/BEND6/FLRT2/PRKD1/DENND5A/SDC2/NLGN2/SERPINF1/FZD4/ARSB/LPAR1/APBB1/ARHGEF15/SPART/LZTS1/NFATC4/HGF/MEF2C/GLI3/ZEB1/PRRX1/ISLR2/GLI2/CAMK1D/FEZ1/DAAM2/THY1/NRP1/TENM4/SYNDIG1/DPYSL3/VIM/FZD1/EPHA3/BCL2/MAGI2/IL34/PBX1/NLGN3/ROBO1/SKI/MAP1B/CXCL12/SHANK3/BMPR2/NEGR1/MEIS1/LGI4/GPR183/NOTCH3/SMARCD3/LRP1/PRKCH/NUMBL/CLSTN3/BMERB1/AS…	BP
regulation of supramolecular fiber organization	197/7182	313/17910	1.73719e-16	9.18838e-15	6.86988e-15	197	S1PR1/ELN/EMILIN1/KIRREL1/SLIT2/DLC1/LPAR1/TGFB3/ARHGEF15/AEBP1/MEF2C/CLIP3/NRP1/NAV3/PPM1F/TTBK2/HDGFL3/MAP1B/CXCL12/SHANK3/MYADM/CCN2/ADD1/GSN/BMERB1/FCHSD2/SH3PXD2B/JMY/EVL/SFRP1/PHLDB2/ANKRD53/TMOD2/PRKN/PIK3R1/ABL1/TMOD1/CRYAB/WASF2/LMOD1/PREX1/NOX4/FLNA/FER/MECP2/ASAP3/SORBS3/RGS4/RDX/ARHGAP6/PLEKHH2/GPR65/PLEKHG2/FES/NIN/TACR1/CFL2/TGFBR1/TPM1/TOGARAM1/ABI2/DSTN/STMN2/SWAP70/NCKAP1L/CLU/HC…	BP
morphogenesis of an epithelium	303/7182	527/17910	2.27741e-16	1.1987e-14	8.9623e-15	303	ZEB2/PKD2/SLIT2/VEGFC/TCF21/DCHS1/ENG/GPC6/PRICKLE1/EDNRA/DACT1/DLC1/FZD4/IGFBP5/DAB2/NFATC4/GREM1/AR/HGF/MEF2C/GLI3/FAT4/GLI2/FGF7/RSPO3/CLIC4/ACVRL1/FRZB/NRP1/CYP7B1/RASIP1/CC2D2A/MSN/ROR2/FZD1/ANKRD6/FOXF1/BCL2/MAGI2/PBX1/SKI/CSF1R/SOX17/TGFBR2/TGFB1I1/PRICKLE2/SMO/ALDH1A3/PKD1/NOTCH4/FGF2/TGFB1/FGF1/COL5A1/SPRY1/SFRP1/PHLDB2/MYO9A/ABL1/SFRP2/WNT2B/SUFU/PGR/FGFR1/CSF1/ROR1/ILK/RHOB/SOX18/SEMA4…	BP
regulation of transcription, DNA-templated	1517/7182	3266/17910	2.29716e-16	1.20322e-14	8.99612e-15	1517	ERG/ZEB2/FSTL1/MAPK10/S1PR1/TCF4/NDN/GAS7/ZNF521/HIC1/NR3C1/ZBTB47/JAZF1/NR2F1/DCN/BHLHE22/PKD2/GLI1/FBN1/TCF21/MAP3K12/SETBP1/HEYL/ENG/POU6F1/LUM/PKNOX2/BNC2/PRICKLE1/ZNF135/MDFIC/CYP1B1/PRKD1/RUNX1T1/ZFPM2/MEOX2/ZNF423/DDR2/DACT1/CD200/FOXN3/PTGIS/FZD4/DAB2/TCEAL7/ZBTB4/ZNF25/APBB1/TGFB3/LZTS1/AEBP1/NFATC4/MAF/GREM1/EFEMP1/RHOQ/ZNF362/EID1/EBF3/ZNF333/AR/GLIS2/HGF/MEF2C/GLI3/ZEB1/PRRX1/ZNF582/W…	BP
negative regulation of cellular metabolic process	1159/7182	2432/17910	2.72952e-16	1.42278e-14	1.06377e-14	1159	RECK/A2M/ZEB2/MAPK10/TIMP2/HIC1/NR3C1/JAZF1/NR2F1/HEG1/CD34/EMILIN1/LDLRAD4/KIRREL1/SLIT2/TCF21/SERPING1/HEYL/DLG4/ENG/POU6F1/BEND6/PRICKLE1/MDFIC/RUNX1T1/ZFPM2/ZNF423/CRTAP/PAPLN/DACT1/SPON1/FOXN3/FBLN1/PTGIS/IGFBP5/DAB2/TCEAL7/ZBTB4/APBB1/MAP1A/LZTS1/AEBP1/NFATC4/MAF/GREM1/TIMP3/EID1/AR/GLIS2/ITIH5/HGF/MEF2C/GLI3/FRY/ZEB1/PRRX1/WWTR1/GLI2/PLPP3/ZNF366/FEZ1/ACVRL1/THY1/LEPR/C4A/COL6A3/RBFOX2/WWC…	BP
regulation of neurogenesis	417/7182	768/17910	3.39792e-16	1.76267e-14	1.3179e-14	417	ZEB2/TCF4/TIMP2/CNTN4/IL6ST/NR2F1/PMP22/SLIT2/VEGFC/HEYL/DLG4/BEND6/FLRT2/PRKD1/DENND5A/SDC2/SERPINF1/FZD4/ARSB/LPAR1/APBB1/SPART/LZTS1/NFATC4/HGF/MEF2C/GLI3/ZEB1/PRRX1/ISLR2/GLI2/CAMK1D/FEZ1/DAAM2/THY1/NRP1/TENM4/DPYSL3/VIM/FZD1/EPHA3/BCL2/MAGI2/IL34/PBX1/NLGN3/ROBO1/SKI/MAP1B/CXCL12/SHANK3/BMPR2/NEGR1/MEIS1/GPR183/NOTCH3/SMARCD3/LRP1/PRKCH/NUMBL/BMERB1/ASPA/FYN/SMO/GDF6/SCN1B/SEMA3G/CDON/TGFB1/…	BP
regulation of RNA metabolic process	1637/7182	3552/17910	3.49749e-16	1.80564e-14	1.35003e-14	1637	ERG/ZEB2/FSTL1/MAPK10/S1PR1/TCF4/NDN/GAS7/ZNF521/HIC1/NR3C1/ZBTB47/JAZF1/NR2F1/DCN/BHLHE22/PKD2/GLI1/FBN1/TCF21/MAP3K12/SETBP1/HEYL/ENG/POU6F1/LUM/PKNOX2/BEND6/BNC2/PRICKLE1/ZNF135/MDFIC/CYP1B1/PRKD1/RUNX1T1/ZFPM2/MEOX2/ZNF423/DDR2/DACT1/CD200/FOXN3/PTGIS/FZD4/DAB2/TCEAL7/ZBTB4/ZNF25/APBB1/TGFB3/LZTS1/AEBP1/FAM172A/NFATC4/MAF/GREM1/EFEMP1/RHOQ/ZNF362/EID1/EBF3/ZNF333/AR/GLIS2/HGF/MEF2C/GLI3/ZEB1/…	BP
response to nitrogen compound	527/7182	1006/17910	3.65817e-16	1.8796e-14	1.40533e-14	527	TEK/GUCY1B1/RAMP3/RFTN2/PKD2/SLIT2/FBN1/HTR2A/RAB31/IGFBP5/KCNJ8/COLEC12/BACE1/RHOQ/MEF2C/ZEB1/GLP2R/PEA15/STAT5B/PDE2A/LEPROT/VIM/ADCY4/SESN3/STING1/MAP1B/CXCL12/SPARC/CDO1/PDGFRA/NOD1/CCN2/ADCY9/GNAI2/GSN/GHR/LRP1/GNAO1/GAB1/FYN/SMPD1/CD81/ADCY5/TGFB1/RARRES2/EDNRB/SFRP1/SOCS5/PDE1B/PRKN/PIK3R1/ABL1/PDE3A/PDGFC/COL6A1/THBD/LDOC1/MTR/KLF11/FOLR2/HDAC5/LRRK2/ABCA1/PRKCB/NSMCE3/ATP6V1G2/TGFBR3/VAM…	BP
positive regulation of gene expression	894/7182	1827/17910	4.54519e-16	2.32429e-14	1.73781e-14	894	ERG/ZEB2/QKI/RBMS3/S1PR1/TCF4/NDN/NR3C1/LRRC32/NR2F1/DCN/CD34/RAMP3/EMILIN1/PKD2/GLI1/TCF21/MAP3K12/HEYL/ENG/LUM/RAMP2/MDFIC/PRKD1/ZFPM2/MEOX2/ZNF423/SPON1/FZD4/DAB2/APBB1/TGFB3/MAF/GREM1/RHOQ/EBF3/AR/GLIS2/HGF/MEF2C/GLI3/ZEB1/PRRX1/WWTR1/GLI2/PTGFR/CREBL2/FLI1/FGF7/STAT5B/RORA/ACVRL1/NFIA/TMEM119/ELK3/MAFB/CREBRF/KLF7/VIM/MSN/PPM1F/ROR2/ANK2/FZD1/CALCOCO1/FOXF1/IL34/PBX1/STING1/ROBO1/SKI/SOX17/B…	BP
regulation of response to stress	790/7182	1592/17910	5.05293e-16	2.57175e-14	1.92282e-14	790	FBLN5/A2M/ZEB2/C1S/C1R/TEK/MAP3K3/HIC1/IL6ST/CD34/AKT3/SELP/MAP3K12/SERPING1/MDFIC/IL1R1/DACT1/TBXA2R/CD200/SYT11/SERPINF1/PTGIS/FZD4/APBB1/COLEC12/CDH5/HGF/MEF2C/PRRX1/SH3RF3/PLPP3/PRKG1/STAT5B/RORA/THY1/C4A/PDE2A/ROR2/CTSK/FZD1/SESN3/FOXF1/BCL2/PTGER3/VASH1/C7/STING1/CXCL12/TRIL/NRK/TGFBR2/PDGFRA/NOD1/CCN2/USP51/PJA2/FLT4/LRP1/FYN/NUAK1/CD81/F2R/GDF6/FGF2/SMOC2/CALCRL/C4B/EDNRB/RGMA/SFRP1/PHLDB…	BP
regulation of biosynthetic process	1881/7182	4135/17910	5.70923e-16	2.89214e-14	2.16237e-14	1881	ERG/ZEB2/IGFBP7/FSTL1/QKI/RBMS3/MAPK10/S1PR1/TCF4/NDN/GAS7/ZNF521/HIC1/NR3C1/ZBTB47/JAZF1/NR2F1/DCN/BHLHE22/CD34/EMILIN1/PKD2/PDGFRB/GLI1/FBN1/HTR2A/TCF21/MAP3K12/SETBP1/HEYL/ENG/POU6F1/C1QTNF2/LUM/PKNOX2/BEND6/BNC2/PRICKLE1/ZNF135/MDFIC/CYP1B1/PRKD1/RUNX1T1/ZFPM2/MEOX2/ZNF423/DDR2/DACT1/CD200/FOXN3/PTGIS/FZD4/IGFBP5/DAB2/TCEAL7/ZBTB4/ZNF25/APBB1/DHH/TGFB3/LZTS1/AEBP1/NFATC4/MAF/GREM1/EFEMP1/RHOQ…	BP
cell-matrix adhesion	144/7182	214/17910	6.01613e-16	3.01926e-14	2.25741e-14	144	FBLN5/TEK/JAM3/CD34/PECAM1/EMILIN1/ECM2/DLC1/THBS3/GREM1/NID1/ACVRL1/THY1/NRP1/PPM1F/EPHA3/BCL2/FERMT2/CCN2/PEAK1/LRP1/SNED1/SGCE/PKD1/ITGA7/SFRP1/PHLDB2/PIK3R1/ABL1/NID2/THBS1/ITGA1/FAM107A/UTRN/CSF1/MACF1/ILK/DUSP3/APOD/KDR/COL16A1/COL3A1/ACTN1/ITGB3/SORBS1/DAPK3/ZYX/VCL/ITGAV/FREM1/ITGB5/ITGB1/ARHGAP6/GPM6B/LDB1/DUSP22/FN1/VCAM1/BST1/SRF/LYVE1/TNN/BCL6/ITGA4/SIGLEC1/ITGA11/PTEN/ADAMTS9/EPDR1/C…	BP
cell junction assembly	144/7182	214/17910	6.01613e-16	3.01926e-14	2.25741e-14	144	TEK/HEG1/RAMP2/DLC1/CDH5/GREM1/GJA4/ACVRL1/THY1/NRP1/CNTNAP1/PPM1F/ANK2/EPHA3/BCL2/FERMT2/TNS1/GJA5/PEAK1/GPBAR1/TLN1/LRP1/PRKCH/SFRP1/PHLDB2/GJC1/MYO9A/PIP5K1C/ABL1/THBS1/LIMS2/FAM107A/MACF1/ILK/DUSP3/APOD/KDR/COL16A1/HDAC7/ACTN1/SORBS1/EPB41L3/FLNA/DAPK3/VCL/LAMC1/RAPGEF1/NFASC/CLDN5/ARHGAP6/GPM6B/RAP1A/PRKACA/LDB1/DUSP22/FN1/PKP3/SNAI2/SRF/FLNC/PTEN/GJA1/CORO1C/MMP14/FLCN/CORO2B/GRHL2/ITGA5/CL…	BP
cell cycle process	650/7182	1280/17910	7.00116e-16	3.49687e-14	2.61451e-14	650	FBXL7/GAS7/PKD2/PDGFRB/GLI1/DACT1/FOXN3/APBB1/LZTS1/EML1/CEP68/KANK2/GEM/NOTCH2/BCL2/MAGI2/VASH1/PBX1/TUBA1A/MYH10/CCN2/USP51/STARD9/PRMT2/SMARCD3/PHC1/SUN2/UBE2E2/JMY/LATS2/PKD1/ADAMTS1/TGFB1/CTDSP2/MARF1/SPRY1/SFRP1/ANKRD53/TACC1/CCDC69/ABL1/PDE3A/GAS6/SNX18/THBS1/KLF11/GAS1/FAM107A/MAP4/PRKCB/KLHDC8B/FGFR1/RRAGB/CCL2/SEPTIN7/ILK/FHL1/NEK9/RHOB/IGF1/CCDC8/ATP2B4/FGF10/FLNA/MAP9/DAPK3/KAT2B/SVIL…	BP
membrane organization	398/7182	730/17910	7.03264e-16	3.49687e-14	2.61451e-14	398	MAPK10/PLSCR4/DLG4/TIE1/RAB31/NLGN2/SYT11/FZD4/DAB2/EHD2/AR/FAT4/NRXN2/F8/MFGE8/ANK2/RILPL1/BCL2/MAGI2/NLGN3/MYH10/SHANK3/MYADM/SGIP1/TMEM43/GSN/FCHSD2/SUN2/TOR1AIP1/GLRB/ATL1/DYSF/COL5A1/PIP5K1C/PRKN/GAS6/AMPH/STX2/SNX18/THBS1/COLQ/HIP1/ABCA1/PRKCB/PINK1/VAMP2/P2RX7/FCGR2B/AZIN2/ELMO1/A4GALT/ATP10A/PTN/GRIK5/NEK9/SSH1/EPB41L3/ABCD2/C3/ITSN1/RFTN1/FNBP1/TRAM2/VPS39/SYPL2/MYH9/ANO6/NFASC/DMPK/TBC1…	BP
regulation of nucleic acid-templated transcription	1544/7182	3338/17910	7.19642e-16	3.5619e-14	2.66313e-14	1544	ERG/ZEB2/FSTL1/MAPK10/S1PR1/TCF4/NDN/GAS7/ZNF521/HIC1/NR3C1/ZBTB47/JAZF1/NR2F1/DCN/BHLHE22/PKD2/GLI1/FBN1/TCF21/MAP3K12/SETBP1/HEYL/ENG/POU6F1/LUM/PKNOX2/BEND6/BNC2/PRICKLE1/ZNF135/MDFIC/CYP1B1/PRKD1/RUNX1T1/ZFPM2/MEOX2/ZNF423/DDR2/DACT1/CD200/FOXN3/PTGIS/FZD4/DAB2/TCEAL7/ZBTB4/ZNF25/APBB1/TGFB3/LZTS1/AEBP1/NFATC4/MAF/GREM1/EFEMP1/RHOQ/ZNF362/EID1/EBF3/ZNF333/AR/GLIS2/HGF/MEF2C/GLI3/ZEB1/PRRX1/ZN…	BP
regulation of macromolecule biosynthetic process	1770/7182	3877/17910	1.22354e-15	6.02831e-14	4.50719e-14	1770	ERG/ZEB2/FSTL1/QKI/RBMS3/MAPK10/S1PR1/TCF4/NDN/GAS7/ZNF521/HIC1/NR3C1/ZBTB47/JAZF1/NR2F1/DCN/BHLHE22/PKD2/PDGFRB/GLI1/FBN1/TCF21/MAP3K12/SETBP1/HEYL/ENG/POU6F1/C1QTNF2/LUM/PKNOX2/BEND6/BNC2/PRICKLE1/ZNF135/MDFIC/CYP1B1/PRKD1/RUNX1T1/ZFPM2/MEOX2/ZNF423/DDR2/DACT1/CD200/FOXN3/PTGIS/FZD4/IGFBP5/DAB2/TCEAL7/ZBTB4/ZNF25/APBB1/TGFB3/LZTS1/AEBP1/NFATC4/MAF/GREM1/EFEMP1/RHOQ/ZNF362/EID1/EBF3/ZNF333/AR/GL…	BP
cellular response to cytokine stimulus	560/7182	1084/17910	1.3973e-15	6.85312e-14	5.12388e-14	560	S1PR1/MAP3K3/NDN/IL6ST/SLIT2/TNFSF12/VEGFC/NPR2/MRAS/IL1R1/PTGIS/FZD4/IL3RA/ACKR1/SLIT3/HGF/ZEB1/STAT5B/RORA/LEPR/CLIP3/DPYSL3/PCOLCE/PDE2A/CREBRF/ANGPT1/VIM/MSN/MSC/FOXF1/BCL2/IL34/ROBO1/CSF1R/SOX17/CXCL12/NOD1/GSN/TLE4/GHR/C1QTNF4/NUMBL/FYN/FGF2/TGFB1/PTPN5/EVL/SFRP1/SH2B3/SOCS5/PDE1B/PRKN/PIK3R1/NRP2/GAS6/PLVAP/THBS1/IL11RA/RAB12/PRDM5/TNFSF8/CCL2/CSF1/ILK/MMP2/PXDN/GFPT2/COL1A2/PID1/CCDC3/AKA…	BP
regulation of RNA biosynthetic process	1546/7182	3348/17910	1.44995e-15	7.07915e-14	5.29287e-14	1546	ERG/ZEB2/FSTL1/MAPK10/S1PR1/TCF4/NDN/GAS7/ZNF521/HIC1/NR3C1/ZBTB47/JAZF1/NR2F1/DCN/BHLHE22/PKD2/GLI1/FBN1/TCF21/MAP3K12/SETBP1/HEYL/ENG/POU6F1/LUM/PKNOX2/BEND6/BNC2/PRICKLE1/ZNF135/MDFIC/CYP1B1/PRKD1/RUNX1T1/ZFPM2/MEOX2/ZNF423/DDR2/DACT1/CD200/FOXN3/PTGIS/FZD4/DAB2/TCEAL7/ZBTB4/ZNF25/APBB1/TGFB3/LZTS1/AEBP1/NFATC4/MAF/GREM1/EFEMP1/RHOQ/ZNF362/EID1/EBF3/ZNF333/AR/GLIS2/HGF/MEF2C/GLI3/ZEB1/PRRX1/ZN…	BP
cell part morphogenesis	333/7182	595/17910	1.48561e-15	7.22058e-14	5.39862e-14	333	ZEB2/NDN/CNTN4/LAMA2/PTPRM/PREX2/BOC/SLIT2/CDH11/DLG4/DOK6/FLRT2/SDC2/FZD4/APBB1/SPART/LZTS1/DOK5/NFATC4/SLIT3/GLI3/ISLR2/GLI2/FEZ1/THY1/RBFOX2/NRP1/ADARB1/KLF7/CNTNAP1/BCL2/NLGN3/ROBO1/MAP1B/CSF1R/MYH10/CXCL12/SHANK3/BMPR2/MAP6/LAMB2/LRP1/NUMBL/GAB1/FYN/PLEKHO1/MEF2A/SCN1B/SEMA3G/ATL1/EVL/TRAK2/SNX1/MYO9A/PRKN/PIK3R1/ABL1/PLXNA4/DPYSL2/NRP2/SEMA6C/GFRA2/ITGA1/LRRK2/SYNGAP1/MATN2/GFRA1/MACF1/ILK/…	BP
regulation of cellular macromolecule biosynthetic process	1705/7182	3725/17910	1.63587e-15	7.91529e-14	5.91803e-14	1705	ERG/ZEB2/FSTL1/QKI/RBMS3/MAPK10/S1PR1/TCF4/NDN/GAS7/ZNF521/HIC1/NR3C1/ZBTB47/JAZF1/NR2F1/DCN/BHLHE22/PKD2/PDGFRB/GLI1/FBN1/TCF21/MAP3K12/SETBP1/HEYL/ENG/POU6F1/C1QTNF2/LUM/PKNOX2/BNC2/PRICKLE1/ZNF135/MDFIC/CYP1B1/PRKD1/RUNX1T1/ZFPM2/MEOX2/ZNF423/DDR2/DACT1/CD200/FOXN3/PTGIS/FZD4/IGFBP5/DAB2/TCEAL7/ZBTB4/ZNF25/APBB1/TGFB3/LZTS1/AEBP1/NFATC4/MAF/GREM1/EFEMP1/RHOQ/ZNF362/EID1/EBF3/ZNF333/AR/GLIS2/HG…	BP
transcription, DNA-templated	1585/7182	3444/17910	2.42392e-15	1.16759e-13	8.72974e-14	1585	ERG/ZEB2/FSTL1/MAPK10/S1PR1/TCF4/NDN/GAS7/ZNF521/HIC1/NR3C1/ZBTB47/JAZF1/NR2F1/DCN/BHLHE22/PKD2/GLI1/FBN1/TCF21/MAP3K12/SETBP1/HEYL/ENG/POU6F1/LUM/PKNOX2/BNC2/PRICKLE1/ZNF135/MDFIC/CYP1B1/PRKD1/RUNX1T1/ZFPM2/CAVIN1/MEOX2/ZNF423/DDR2/DACT1/CD200/FOXN3/PTGIS/FZD4/DAB2/TCEAL7/ZBTB4/ZNF25/APBB1/TGFB3/LZTS1/AEBP1/NFATC4/MAF/GREM1/EFEMP1/RHOQ/ZNF362/EID1/EBF3/ZNF333/AR/GLIS2/HGF/MEF2C/GLI3/ZEB1/PRRX1/Z…	BP
regulation of cell cycle	588/7182	1149/17910	2.87172e-15	1.37715e-13	1.02965e-13	588	FBXL7/TTC28/GAS7/TIMP2/PKD2/PDGFRB/GLI1/NPR2/DACT1/FOXN3/APBB1/PEA15/STAT5B/RPS6KA2/ADARB1/KANK2/NOTCH2/BCL2/MAGI2/VASH1/PBX1/TUBA1A/CCN2/USP51/PRMT2/SMARCD3/PHC1/UBE2E2/JMY/LATS2/PKD1/ADAMTS1/SMOC2/TGFB1/NR2F2/CTDSP2/SFRP1/ANKRD53/ABL1/PDE3A/GAS6/THBS1/GAS1/FAM107A/FGFR1/RRAGB/CCL2/SEPTIN7/ILK/DUSP3/FHL1/CDK17/RHOB/IGF1/CCDC8/ATP2B4/PRKACB/FGF10/MAP9/DAPK3/KAT2B/SVIL/CKS2/FAP/GNAI1/HSPA2/MECP2/C…	BP
nucleic acid-templated transcription	1608/7182	3500/17910	2.98745e-15	1.42631e-13	1.06641e-13	1608	ERG/ZEB2/FSTL1/MAPK10/S1PR1/TCF4/NDN/GAS7/ZNF521/HIC1/NR3C1/ZBTB47/JAZF1/NR2F1/DCN/BHLHE22/PKD2/GLI1/FBN1/TCF21/MAP3K12/SETBP1/HEYL/ENG/POU6F1/LUM/PKNOX2/BEND6/BNC2/PRICKLE1/ZNF135/MDFIC/CYP1B1/PRKD1/RUNX1T1/ZFPM2/CAVIN1/MEOX2/ZNF423/DDR2/DACT1/CD200/FOXN3/PTGIS/FZD4/DAB2/TCEAL7/ZBTB4/ZNF25/APBB1/TGFB3/LZTS1/AEBP1/NFATC4/MAF/GREM1/EFEMP1/RHOQ/ZNF362/EID1/EBF3/ZNF333/AR/GLIS2/HGF/MEF2C/GLI3/ZEB1/P…	BP
T cell activation	258/7182	443/17910	4.96748e-15	2.36119e-13	1.7654e-13	258	LRRC32/IL6ST/GLI3/ZEB1/GLI2/STAT5B/RORA/THY1/LEPR/MAFB/PDE5A/MSN/BCL2/TGFBR2/GSN/GPR183/FYN/CD81/HLX/TGFB1/TWSG1/LOXL3/SOCS5/PIK3R1/ABL1/P2RX7/FCGR2B/TNFSF8/CCL2/DUSP3/ZMIZ1/CD1D/IGF1/FZD8/LGALS1/PREX1/FGL2/ZBTB16/ITPKB/SATB1/MYH9/GPNMB/PIK3R6/FZD7/CD1C/ZFP36L1/FOXP1/CYLD/DUSP22/KIT/PIK3CA/CD4/VCAM1/TMEM131L/CD28/JAML/CCL19/AIF1/PRNP/NLRP3/SRF/PPP3CB/BCL6/PIK3CD/DTX1/PRKAR1A/CD209/GJA1/TESPA1/IL4…	BP
regulation of actin cytoskeleton organization	185/7182	297/17910	6.3155e-15	2.98878e-13	2.23463e-13	185	TEK/S1PR1/JAM3/ELN/PDGFRB/KIRREL1/SLIT2/DLC1/LPAR1/TGFB3/ARHGEF15/RHOQ/MEF2C/NRP1/PPM1F/NOTCH2/EPHA3/CSF1R/CXCL12/SHANK3/MYADM/PDGFRA/CCN2/ADD1/GSN/LRP1/FCHSD2/SH3PXD2B/JMY/TGFB1/EVL/SFRP1/PHLDB2/TMOD2/PRKN/PIK3R1/ABL1/TMOD1/FAM107A/DIXDC1/ILK/WASF2/PAM/LMOD1/PREX1/NOX4/FLNA/DAPK3/FER/ASAP3/SORBS3/RGS4/RDX/ARHGAP6/GPM6B/PLEKHH2/GPR65/PLEKHG2/FES/TACR1/BST1/CFL2/TGFBR1/TPM1/ABL2/GMFG/ABI2/DSTN/CCD…	BP
leukocyte differentiation	278/7182	485/17910	6.78007e-15	3.19463e-13	2.38853e-13	278	FBN1/MEF2C/GLI3/ZEB1/GLI2/FAM20C/STAT5B/RORA/LEPR/GAB3/MAFB/ROR2/NOTCH2/BCL2/IL34/CSF1R/TGFBR2/LRRC17/GPR183/DOCK11/CD81/HLX/TGFB1/SH3PXD2A/SFRP1/LOXL3/SOCS5/PDE1B/MITF/PIK3R1/ABL1/GAS6/NRROS/ITM2A/HDAC5/TSPAN2/FCGR2B/CSF1/ZMIZ1/CD1D/RASSF2/FZD8/LGALS1/KLF10/PREX1/L3MBTL3/OSTM1/ZBTB16/ITPKB/DOCK10/SATB1/MYH9/AXL/NME1/ITGB1/PIK3R6/TFE3/FZD7/ZFP36L1/TAL1/FES/FOXP1/CYLD/KIT/RRAS/CD4/PAFAH1B1/VCAM1/T…	BP
Rho protein signal transduction	112/7182	159/17910	7.49416e-15	3.51574e-13	2.62862e-13	112	HEG1/PECAM1/PREX2/PDGFRB/DLC1/ARHGEF17/LPAR1/RASGRF2/ARHGEF15/ARHGEF6/NRP1/KANK2/RASIP1/ARHGEF25/ROBO1/FGD5/F2R/RIPOR1/ABL1/ABCA1/ARHGEF40/FGD1/RHOB/COL1A2/COL3A1/PREX1/ARHGEF9/ITSN1/PLEKHG1/ARHGAP29/NTN1/ARHGAP1/MYO9B/ITGB1/ARHGAP6/NGFR/PLEKHG2/PDPN/ARHGEF26/BCL6/ABL2/FGD2/TRIO/ARHGEF16/CDH13/AGTR1/FLCN/TIAM1/SOS1/AKAP13/FGD3/CNKSR1/ARRB1/ROCK1/ARHGEF2/SOS2/EPS8L1/ARHGEF10/ARHGEF39/RIPOR2/ARHGEF…	BP
regulation of cellular response to stress	386/7182	713/17910	8.13737e-15	3.80096e-13	2.84187e-13	386	FBLN5/ZEB2/MAP3K3/HIC1/CD34/AKT3/MAP3K12/MDFIC/DACT1/FZD4/APBB1/HGF/PRRX1/SH3RF3/THY1/ROR2/FZD1/BCL2/VASH1/CXCL12/NRK/NOD1/CCN2/USP51/PJA2/FLT4/LRP1/FYN/NUAK1/GDF6/RGMA/SFRP1/PRKN/PIK3R1/ABL1/SFRP2/CRYAB/LRRK2/PINK1/HIPK3/FCGR2B/DUSP3/SASH1/PTN/FAM168A/RASSF2/SEMA4C/FZD8/FGF10/TERF2IP/SCARF1/CREBBP/RAPGEF1/PER1/DUSP1/NACC2/HSPB8/FZD7/HAND2/ACKR3/KCNK2/CYLD/PAFAH1B1/MAPKAP1/PBK/CCL19/BMPR1A/GADD45…	BP
RNA biosynthetic process	1611/7182	3516/17910	9.20348e-15	4.28041e-13	3.20034e-13	1611	ERG/ZEB2/FSTL1/MAPK10/S1PR1/TCF4/NDN/GAS7/ZNF521/HIC1/NR3C1/ZBTB47/JAZF1/NR2F1/DCN/BHLHE22/PKD2/GLI1/FBN1/TCF21/MAP3K12/SETBP1/HEYL/ENG/POU6F1/LUM/PKNOX2/BEND6/BNC2/PRICKLE1/ZNF135/MDFIC/CYP1B1/PRKD1/RUNX1T1/ZFPM2/CAVIN1/MEOX2/ZNF423/DDR2/DACT1/CD200/FOXN3/PTGIS/FZD4/DAB2/TCEAL7/ZBTB4/ZNF25/APBB1/TGFB3/LZTS1/AEBP1/NFATC4/MAF/GREM1/EFEMP1/RHOQ/ZNF362/EID1/EBF3/ZNF333/AR/GLIS2/HGF/MEF2C/GLI3/ZEB1/P…	BP
positive regulation of cell death	384/7182	710/17910	1.16286e-14	5.36656e-13	4.01242e-13	384	SEPTIN4/RAMP3/PDGFRB/SLIT2/TNFSF12/CYP1B1/DLC1/ARHGEF17/PTGIS/LPAR1/APBB1/RASGRF2/TGFB3/BACE1/NFATC4/ARHGEF6/TIMP3/ECSCR/MEF2C/CAMK1D/PEA15/CLIP3/FRZB/RPS6KA2/CALHM2/PPM1F/SRPX/BCL2/ROBO1/NOD1/CCN2/PRMT2/GSN/LRP1/FYN/SMPD1/F2R/JMY/ALDH1A3/SFRP4/TXNIP/TGFB1/SFRP1/ABL1/SFRP2/RNF122/CD248/THBS1/KLF11/HIP1/ITGA1/LRRK2/PINK1/FGD1/PHLDA3/P2RX7/FCGR2B/CCL2/SEPTIN7/NLRP1/PTN/GRIK5/NGF/SSH1/RHOB/RASSF2/KC…	BP
positive regulation of MAPK cascade	284/7182	499/17910	1.16745e-14	5.36656e-13	4.01242e-13	284	ZEB2/MAPK10/TEK/MAP3K3/TIMP2/RAMP3/PDGFRB/HTR2A/MAP3K12/C1QTNF2/MDFIC/FZD4/LPAR1/TGFB3/DOK5/AR/HGF/IGFBP4/SH3RF3/PEA15/NRP1/ANGPT1/GLIPR2/PDE5A/ROR2/NOTCH2/ROBO1/CSF1R/NRK/PDGFRA/NOD1/CCN2/GNAI2/PJA2/FLT4/GPR183/GHR/LRP1/CD81/F2R/GDF6/FGF2/CDON/TGFB1/FGF1/ABL1/GAS6/CAVIN3/THBS1/ITGA1/LRRK2/P2RX7/FGFR1/FCGR2B/PRXL2C/ILK/BMPER/SASH1/KDR/NGF/IGF1/RASSF2/SEMA4C/TNFAIP8L3/FZD8/FGF10/NOX4/AKAP12/DSTYK/…	BP
regulation of cellular biosynthetic process	1839/7182	4060/17910	1.16881e-14	5.36656e-13	4.01242e-13	1839	ERG/ZEB2/FSTL1/QKI/RBMS3/MAPK10/S1PR1/TCF4/NDN/GAS7/ZNF521/HIC1/NR3C1/ZBTB47/JAZF1/NR2F1/DCN/BHLHE22/CD34/PKD2/PDGFRB/GLI1/FBN1/HTR2A/TCF21/MAP3K12/SETBP1/HEYL/ENG/POU6F1/C1QTNF2/LUM/PKNOX2/BEND6/BNC2/PRICKLE1/ZNF135/MDFIC/CYP1B1/PRKD1/RUNX1T1/ZFPM2/MEOX2/ZNF423/DDR2/DACT1/CD200/FOXN3/PTGIS/FZD4/IGFBP5/DAB2/TCEAL7/ZBTB4/ZNF25/APBB1/TGFB3/LZTS1/AEBP1/NFATC4/MAF/GREM1/EFEMP1/RHOQ/ZNF362/EID1/EBF3/Z…	BP
regulation of MAPK cascade	374/7182	689/17910	1.29317e-14	5.91243e-13	4.42055e-13	374	ZEB2/MAPK10/TEK/MAP3K3/TIMP2/RAMP3/EMILIN1/PDGFRB/HTR2A/MAP3K12/C1QTNF2/MDFIC/DACT1/FBLN1/FZD4/LPAR1/TGFB3/DOK5/TIMP3/AR/HGF/IGFBP4/SH3RF3/PEA15/NRP1/ANGPT1/GLIPR2/PDE5A/ROR2/NOTCH2/ROBO1/CSF1R/NRK/PDGFRA/NOD1/CCN2/GNAI2/PJA2/FLT4/GPR183/GHR/LRP1/LMO3/SMPD1/CD81/F2R/GDF6/FGF2/LBH/CDON/TGFB1/FGF1/SPRY1/SFRP1/SH2B3/PRKN/ABL1/SFRP2/GAS6/CAVIN3/THBS1/ITGA1/DUSP26/LRRK2/SYNGAP1/PINK1/HIPK3/P2RX7/FGFR1…	BP
cell projection morphogenesis	321/7182	577/17910	1.44798e-14	6.59229e-13	4.92887e-13	321	ZEB2/NDN/CNTN4/LAMA2/PTPRM/PREX2/BOC/SLIT2/CDH11/DLG4/DOK6/FLRT2/SDC2/FZD4/APBB1/SPART/LZTS1/DOK5/NFATC4/SLIT3/GLI3/ISLR2/GLI2/FEZ1/THY1/RBFOX2/NRP1/ADARB1/KLF7/CNTNAP1/BCL2/NLGN3/ROBO1/MAP1B/CSF1R/MYH10/CXCL12/SHANK3/BMPR2/MAP6/LAMB2/LRP1/NUMBL/GAB1/FYN/PLEKHO1/MEF2A/SCN1B/SEMA3G/ATL1/EVL/TRAK2/SNX1/MYO9A/PRKN/PIK3R1/ABL1/PLXNA4/DPYSL2/NRP2/SEMA6C/GFRA2/ITGA1/LRRK2/SYNGAP1/MATN2/GFRA1/MACF1/ILK/…	BP
cell-cell adhesion	412/7182	771/17910	1.46706e-14	6.65107e-13	4.97281e-13	412	CNTN4/LRRC32/IL6ST/JAM3/CD34/PECAM1/PTPRM/JAM2/KIRREL1/COL8A2/SELP/DCHS1/COL14A1/CYP1B1/PCDHGB7/CD200/NLGN2/PCDH18/SCARF2/PCDHB4/GLI3/FAT4/GLI2/NRXN2/PLPP3/PRKG1/STAT5B/CD93/THY1/PARVA/PCDHGA12/SPARCL1/PCDHGC3/PEAR1/PDE5A/MSN/PPM1F/CNN3/FOXF1/BCL2/TRO/NLGN3/ROBO1/THBS4/CXCL12/MYADM/NEGR1/TGFBR2/PDGFRA/TLN1/CLSTN3/CADM3/FYN/CD81/HLX/PKD1/PCDHGB6/ADAM19/TGFB1/TWSG1/ITGA7/MDGA1/ESAM/PCDH12/LOXL3/SH2…	BP
regulation of protein serine/threonine kinase activity	274/7182	479/17910	1.49686e-14	6.75779e-13	5.05261e-13	274	ZEB2/MAPK10/MAP3K3/HEG1/PKD2/PDGFRB/HTR2A/MAP3K12/C1QTNF2/MDFIC/FZD4/LPAR1/TGFB3/HGF/PEA15/THY1/RASIP1/PDE5A/ROR2/ROBO1/CSF1R/NRK/NOD1/GHR/SMPD1/CD81/F2R/LATS2/PKD1/FGF2/TGFB1/NR2F2/FGF1/SFRP1/SH2B3/ABL1/SFRP2/THBS1/ITGA1/LRRK2/HIPK3/P2RX7/FGFR1/ILK/DUSP3/SASH1/NGF/IGF1/ATP2B4/FZD8/FGF10/NOX4/KAT2B/CKS2/INKA1/CSPG4/KSR1/RAPGEF1/SHC2/RGS4/PRKAR2B/DUSP1/MYOCD/MAPK11/PIK3R5/PIK3R6/UVRAG/ADRB2/RGS2/H…	BP
positive regulation of GTPase activity	205/7182	339/17910	1.82789e-14	8.18405e-13	6.11897e-13	205	SYDE1/S1PR1/ARHGAP31/PREX2/STARD8/DLC1/ARHGAP20/ARHGEF15/ARHGEF6/THY1/NRP1/ADAP2/RGS5/FAM13B/TBC1D19/ARHGAP22/DOCK11/GNAO1/F2R/RIN3/GIT2/SFRP1/MYO9A/SNX18/LRRK2/ARHGAP15/SYNGAP1/IQSEC1/ARHGAP10/ARHGAP24/RASA3/GNB5/MAPRE2/STARD13/PREX1/RSU1/DOCK4/ARHGAP29/ARHGAP1/DOCK10/ASAP3/MYO9B/RAPGEF1/RGS4/ASAP1/ITGB1/ARHGAP6/SEC23A/ADCYAP1/RAP1A/GPR65/RGS2/BNIP2/CHN1/SIPA1/CCL19/RASGRP2/RABEP1/RGS9/HTR2B/ARH…	BP
regulation of actin filament-based process	206/7182	341/17910	1.82795e-14	8.18405e-13	6.11897e-13	206	TEK/S1PR1/JAM3/ELN/PDGFRB/KIRREL1/SLIT2/DLC1/LPAR1/TGFB3/ARHGEF15/RHOQ/MEF2C/NRP1/PPM1F/ANK2/NOTCH2/EPHA3/CSF1R/CXCL12/SHANK3/MYADM/PDGFRA/CCN2/ADD1/GJA5/GSN/LRP1/FCHSD2/SH3PXD2B/JMY/TGFB1/EVL/SFRP1/PHLDB2/TMOD2/PRKN/PIK3R1/ABL1/TMOD1/FAM107A/DIXDC1/FRMD6/ILK/WASF2/PAM/LMOD1/CACNA1C/PREX1/NOX4/FLNA/DAPK3/FER/ASAP3/MYH9/PLN/SORBS3/RGS4/RDX/ARHGAP6/PDE4B/GPM6B/PLEKHH2/GPR65/PLEKHG2/FES/TACR1/BST1/A…	BP
negative regulation of multicellular organismal process	641/7182	1276/17910	1.93569e-14	8.63062e-13	6.45286e-13	641	TEK/MMRN2/CNTN4/LRRC32/GUCY1A1/NR2F1/DCN/CD34/PTPRM/EMILIN1/PMP22/LDLRAD4/SLIT2/FBN1/SERPING1/NPR2/LAMA4/PRICKLE1/TIE1/DENND5A/ZFPM2/PLCL1/MEOX2/ZNF423/TBXA2R/CD200/SYT11/SERPINF1/IGFBP5/LPAR1/TGFB3/ARHGEF15/SPART/NFATC4/SSC5D/GREM1/EFEMP1/STAB1/MCC/ECSCR/HGF/MEF2C/GLI3/GLI2/PRKG1/NOVA2/STAT5B/DAAM2/ACVRL1/THY1/FRZB/NRP1/WWC3/DPYSL3/TMEM119/NAV3/MAFB/KLF7/ASPN/ANGPT1/PDE5A/VIM/COL4A2/CTSK/BCL2/VA…	BP
peptidyl-amino acid modification	565/7182	1107/17910	2.00553e-14	8.90522e-13	6.65818e-13	565	TEK/IL6ST/DCN/RAMP3/PECAM1/FKBP7/PDGFRB/HTR2A/MAP3K12/DLG4/PRKD1/TIE1/PLCL1/CRTAP/DDR2/GALNT16/APBB1/GREM1/EFEMP1/EID1/HGF/CREBL2/FGF7/THY1/CLIP3/NRP1/ANGPT1/PPM1F/ROR2/P3H3/BGN/EPHA3/BCL2/TTBK2/THBS4/CSF1R/TGFBR2/PDGFRA/FLT4/PEAK1/GHR/PRDM6/DCLK2/EZH1/FYN/CD81/ARL2BP/PKD1/TGFB1/NAP1L2/SFRP1/LOXL3/SH2B3/SOCS5/ABL1/SFRP2/PDGFC/RASD2/GAS6/FKBP14/PHF1/LRRK2/PRKCB/PINK1/HIPK3/PRDM5/FGFR1/ROR1/ILK/KDR…	BP
regulation of cellular protein localization	288/7182	509/17910	2.0585e-14	9.10297e-13	6.80602e-13	288	RAMP3/GPC6/MDFIC/SYT11/DAB2/MAP1A/RHOQ/AR/GLIS2/GLI3/STOM/CLIP3/LEPROT/ANGPT1/MSN/PPM1F/PKIG/EPHA3/BCL2/TTBK2/GSN/LRP1/PRKCH/DCLK2/FYN/CD81/SMO/TGFB1/RIPOR1/PRKN/PIK3R1/GAS6/SUFU/LRRK2/PINK1/VAMP2/APOD/PTN/SSH1/SORBS1/PID1/FLNA/GNAI1/KCNB1/OAZ2/RDX/ITGB1/NGFR/GPM6B/RAP1A/RAB23/RTN4/PRKACA/EPB41L2/HYAL2/CYLD/CDK1/CNPY4/RAB11FIP5/PRNP/SNX33/TFDP2/PTPN14/RUFY3/CROCC/ITGAM/CCDC88A/NPTN/PKIA/SH3GLB1/L…	BP
response to lipid	463/7182	883/17910	2.11033e-14	9.29408e-13	6.94891e-13	463	IGFBP7/PLPP1/NR3C1/PLSCR4/NR2F1/DCN/RAMP3/PTGIR/PDGFRB/SLIT2/SELP/TCF21/FIBIN/HEYL/ENG/RAMP2/LOXL1/TIE1/TBXA2R/SERPINF1/FZD4/KCNJ8/DAB2/LPAR1/DHH/TGFB3/NFATC4/AR/SLIT3/MEF2C/PTGFR/ZNF366/STAT5B/RORA/RBFOX2/CYP7B1/KANK2/CREBRF/VIM/MSN/CALCOCO1/KLF9/EPHA3/BCL2/MAP1B/SPARC/CDO1/TGFBR2/CCN2/PRMT2/TGFB1I1/LMO3/F2R/SMO/ADCY5/TXNIP/LBH/TGFB1/NR2F2/EDNRB/SFRP1/ABL1/ETS1/THBD/LDOC1/THBS1/PTGER1/PGR/CRYAB/…	BP
cellular response to oxygen-containing compound	547/7182	1068/17910	2.40306e-14	1.05403e-12	7.88065e-13	547	FBLN5/NR3C1/PLSCR4/GUCY1B1/RAMP3/PKD2/SLIT2/FBN1/CYP1B1/PRKD1/TBXA2R/RAB31/SERPINF1/FZD4/IGFBP5/LPAR1/COLEC12/BACE1/NFATC4/RHOQ/AR/HGF/MEF2C/ZEB1/GLP2R/PTGFR/STAT5B/RORA/PDE2A/LEPROT/KANK2/KLF7/VIM/MSN/ADCY4/KLF9/SESN3/EPHA3/MAP1B/PDGFRA/NOD1/ADCY9/GNAI2/GHR/LRP1/GAB1/FYN/SMO/ADCY5/CALCRL/TGFB1/RARRES2/EDNRB/SFRP1/PRKN/PIK3R1/ABL1/PDE3A/PDGFC/GAS6/ETS1/COL6A1/LDOC1/MTR/KLF11/FOLR2/HDAC5/LRRK2/ABC…	BP
cell chemotaxis	161/7182	253/17910	2.46731e-14	1.07782e-12	8.05858e-13	161	S1PR1/JAM3/PDGFRB/SLIT2/VEGFC/PRKD1/LPAR1/GREM1/HGF/CAMK1D/PARVA/NRP1/CYP7B1/CH25H/THBS4/CXCL12/PDGFRA/GPR183/GAB1/ITGA9/FGF2/SMOC2/RARRES2/FGF1/DYSF/EDNRB/PIP5K1C/GAS6/THBS1/ITGA1/FGFR1/CCL2/CSF1/PTN/KDR/PREX1/DOCK4/ANO6/DUSP1/PDE4B/PDGFD/LYST/C3AR1/IL16/KIT/VCAM1/BST1/JAML/CCL19/AIF1/FLT1/LOX/PIK3CD/SWAP70/ARHGEF16/NCKAP1L/AGTR1/TIAM1/CXCR4/CCN3/ELMO2/PDE4D/CCR2/PDGFB/MPP1/TNFSF14/BIN2/ZNF580/L…	BP
heart development	310/7182	556/17910	2.82117e-14	1.22743e-12	9.17717e-13	310	TEK/S1PR1/HEG1/ELN/BICC1/EMILIN1/PKD2/PDGFRB/LTBP1/SLIT2/GLI1/FBN1/HEYL/DCHS1/ENG/POU6F1/RAMP2/PRICKLE1/FLRT2/EDNRA/ZFPM2/DLC1/KCNJ8/NFATC4/GREM1/SLIT3/MEF2C/GLI3/FAT4/GLI2/SGCD/ACVRL1/PARVA/NRP1/TENM4/PDE2A/DYNC2H1/CC2D2A/ADAP2/ANK2/FZD1/NOTCH2/FOXF1/ROBO1/SOX17/MYH10/APLNR/BMPR2/SPARC/TGFBR2/PDGFRA/MEIS1/GJA5/MEF2D/SMARCD3/SH3PXD2B/SMO/PKD1/MEF2A/ADAMTS1/VEGFB/FGF2/CALCRL/TGFB1/PDLIM3/COL5A1/SP…	BP
regulation of Ras protein signal transduction	141/7182	215/17910	2.96948e-14	1.28271e-12	9.59044e-13	141	TIMP2/HEG1/PREX2/PDGFRB/DLC1/ARHGEF17/LPAR1/RASGRF2/ARHGEF15/CYTH3/ARHGEF6/NRP1/KANK2/RASIP1/NOTCH2/ARHGEF25/ROBO1/FGD5/F2R/ABL1/RASGRP4/ABCA1/SYNGAP1/ARHGEF40/IQSEC1/FGD1/CSF1/NGF/IGF1/COL3A1/RASA3/MAPRE2/FGF10/PREX1/ARHGEF9/ITSN1/PLEKHG1/ITPKB/MYO9B/RAPGEF1/RDX/ITGB1/PLEKHG2/MAPKAP1/CYTH4/ARHGEF26/BCL6/ABL2/FGD2/TRIO/ARHGEF16/FLCN/SHC1/TIAM1/SOS1/AKAP13/PSD/IQSEC3/FGD3/ARRB1/ARHGEF2/SOS2/EPS8L1…	BP
plasma membrane bounded cell projection morphogenesis	318/7182	573/17910	2.97198e-14	1.28271e-12	9.59044e-13	318	ZEB2/NDN/CNTN4/LAMA2/PTPRM/PREX2/BOC/SLIT2/CDH11/DLG4/DOK6/FLRT2/SDC2/FZD4/APBB1/SPART/LZTS1/DOK5/NFATC4/SLIT3/GLI3/ISLR2/GLI2/FEZ1/THY1/RBFOX2/NRP1/ADARB1/KLF7/CNTNAP1/BCL2/NLGN3/ROBO1/MAP1B/CSF1R/MYH10/CXCL12/SHANK3/BMPR2/MAP6/LAMB2/LRP1/NUMBL/GAB1/FYN/PLEKHO1/MEF2A/SCN1B/SEMA3G/ATL1/EVL/TRAK2/SNX1/MYO9A/PRKN/PIK3R1/ABL1/PLXNA4/DPYSL2/NRP2/SEMA6C/GFRA2/ITGA1/LRRK2/SYNGAP1/MATN2/GFRA1/MACF1/ILK/…	BP
regulation of neuron differentiation	335/7182	609/17910	3.04878e-14	1.31061e-12	9.79907e-13	335	ZEB2/TCF4/TIMP2/CNTN4/NR2F1/PMP22/SLIT2/HEYL/DLG4/BEND6/PRKD1/DENND5A/SDC2/SERPINF1/FZD4/ARSB/LPAR1/APBB1/SPART/LZTS1/NFATC4/HGF/MEF2C/GLI3/ZEB1/PRRX1/ISLR2/GLI2/CAMK1D/FEZ1/THY1/NRP1/DPYSL3/VIM/FZD1/EPHA3/BCL2/MAGI2/PBX1/NLGN3/ROBO1/MAP1B/CXCL12/SHANK3/BMPR2/NEGR1/MEIS1/NOTCH3/LRP1/FYN/GDF6/SCN1B/SEMA3G/CDON/TRAK2/EDNRB/RGMA/NAP1L2/SFRP1/MYO9A/PRKN/ABL1/PLXNA4/SFRP2/DPYSL2/LRRK2/SYNGAP1/DIXDC1/F…	BP
negative regulation of nitrogen compound metabolic process	1076/7182	2271/17910	3.15537e-14	1.35105e-12	1.01014e-12	1076	RECK/A2M/ZEB2/MAPK10/TIMP2/HIC1/NR3C1/JAZF1/NR2F1/HEG1/CD34/EMILIN1/LDLRAD4/KIRREL1/SLIT2/TCF21/SERPING1/HEYL/ENG/POU6F1/BEND6/PRICKLE1/MDFIC/RUNX1T1/ZFPM2/ZNF423/CRTAP/PAPLN/DACT1/SPON1/FOXN3/FBLN1/PTGIS/IGFBP5/DAB2/TCEAL7/ZBTB4/APBB1/MAP1A/AEBP1/NFATC4/MAF/GREM1/TIMP3/EID1/AR/GLIS2/ITIH5/HGF/MEF2C/GLI3/FRY/ZEB1/PRRX1/WWTR1/GLI2/PLPP3/ZNF366/ACVRL1/THY1/C4A/COL6A3/RBFOX2/WWC3/DKK3/ELK3/PDE2A/ADA…	BP
regulation of protein localization	506/7182	979/17910	3.27627e-14	1.39727e-12	1.0447e-12	506	LRRC32/CD34/RAMP3/ITPR1/VEGFC/GPC6/MDFIC/CD200/NLGN2/SYT11/DAB2/APBB1/TGFB3/MAP1A/SSC5D/RHOQ/AR/GLIS2/GLI3/STOM/CLIP3/LEPROT/KLF7/ANGPT1/MSN/PPM1F/PKIG/EPHA3/BCL2/TTBK2/CSF1R/MYH10/GJA5/GSN/FRMD4A/LRP1/PRKCH/C1QTNF4/CLSTN3/DCLK2/FYN/CD81/F2R/SMO/ARL2BP/ADCY5/TGFB1/RIPOR1/SFRP1/PRKN/PIK3R1/ABL1/GAS6/WLS/SUFU/LRRK2/PINK1/VAMP2/P2RX7/FCGR2B/NLRP1/APOD/PTN/SSH1/ISL1/IGF1/PAM/SORBS1/PID1/CACNA1C/FLNA/…	BP
transmembrane receptor protein tyrosine kinase signaling pathway	363/7182	669/17910	3.46472e-14	1.47182e-12	1.10044e-12	363	ADGRA2/TEK/NDN/MMRN2/DCN/EMILIN1/PTGIR/PDGFRB/VEGFC/FLRT2/PRKD1/DDR2/SDC2/FZD4/IGFBP5/DOK5/NFATC4/GREM1/EFEMP1/RHOQ/AR/HGF/IGFBP4/FAT4/FAM20C/FGF7/STAT5B/RBFOX2/NRP1/LEPROT/ANGPT1/SESN3/EPHA3/ROBO1/CSF1R/PDGFRA/CCN2/GNAI2/FLT4/GHR/LRP1/GAB1/FYN/TXNIP/VEGFB/CRIM1/FGF2/SMOC2/TGFB1/RARRES2/FGF1/SPRY1/CILP/SH2B3/SOCS5/PIK3R1/ABL1/PDGFC/NRP2/GFRA2/THBS1/RASGRP4/HIP1/ITGA1/PRKCB/ATP6V1G2/PDGFRL/FGFR1/G…	BP
positive regulation of apoptotic process	355/7182	652/17910	3.53169e-14	1.49439e-12	1.11731e-12	355	SEPTIN4/PDGFRB/SLIT2/TNFSF12/CYP1B1/DLC1/ARHGEF17/PTGIS/LPAR1/APBB1/RASGRF2/TGFB3/BACE1/NFATC4/ARHGEF6/TIMP3/ECSCR/MEF2C/CAMK1D/PEA15/CLIP3/FRZB/RPS6KA2/CALHM2/PPM1F/SRPX/BCL2/ROBO1/NOD1/CCN2/PRMT2/GSN/SMPD1/F2R/JMY/ALDH1A3/SFRP4/TXNIP/TGFB1/SFRP1/ABL1/SFRP2/RNF122/CD248/THBS1/KLF11/HIP1/ITGA1/PINK1/FGD1/PHLDA3/P2RX7/CCL2/SEPTIN7/NLRP1/PTN/GRIK5/NGF/RHOB/RASSF2/KCNMA1/PREX1/NOX4/PNMA1/AKAP12/ARHG…	BP
import into cell	401/7182	751/17910	3.91438e-14	1.64985e-12	1.23354e-12	401	RAMP3/PECAM1/DLG4/RAMP2/PRKD1/CD302/RAB31/SYT11/KCNJ8/DAB2/COLEC12/EHD2/GREM1/MARCHF2/STAB1/ABCC9/CAMK1D/MRC2/CD93/LEPR/CLIP3/C4A/PEAR1/ATP1B2/TUB/MFGE8/ANGPT1/SRPX/ANK2/EPHA3/MAGI2/NLGN3/STON1/HSPG2/SPARC/TGFBR2/NEURL1B/SGIP1/GSN/GHR/LRP1/FCHSD2/FYN/CD81/SFRP4/RIN3/WIPF1/CALCRL/TGFB1/RSPO1/DYSF/C4B/ISCU/SNX1/PIP5K1C/PRKN/PIK3R1/ABL1/CLEC10A/DPYSL2/GAS6/AMPH/SNX18/THBS1/FOLR2/HIP1/LRRK2/ABCA1/P2R…	BP
actin filament organization	197/7182	325/17910	4.2626e-14	1.78963e-12	1.33805e-12	197	S1PR1/ELN/KIRREL1/SLIT2/DLC1/LPAR1/TGFB3/ARHGEF15/NRP1/DPYSL3/PPM1F/BCL2/CXCL12/SHANK3/MYADM/CCN2/ADD1/GSN/FCHSD2/SH3PXD2B/JMY/WIPF1/PDLIM3/EVL/SFRP1/PHLDB2/TMOD2/SHROOM4/PRKN/PIK3R1/ABL1/TMOD1/FAM107A/CGNL1/WASF2/ACTN1/LMOD1/SORBS1/PREX1/NOX4/FLNA/ZYX/FER/ASAP3/SORBS3/RGS4/ITGB5/RDX/ARHGAP6/PLEKHH2/GPR65/PLEKHG2/MICAL2/MARCKS/TACR1/PHACTR1/AIF1/CFL2/TGFBR1/TPM1/SRF/RUFY3/ABI2/DSTN/SWAP70/SORBS2/…	BP
positive regulation of programmed cell death	358/7182	660/17910	5.55973e-14	2.32517e-12	1.73846e-12	358	SEPTIN4/PDGFRB/SLIT2/TNFSF12/CYP1B1/DLC1/ARHGEF17/PTGIS/LPAR1/APBB1/RASGRF2/TGFB3/BACE1/NFATC4/ARHGEF6/TIMP3/ECSCR/MEF2C/CAMK1D/PEA15/CLIP3/FRZB/RPS6KA2/CALHM2/PPM1F/SRPX/BCL2/ROBO1/NOD1/CCN2/PRMT2/GSN/SMPD1/F2R/JMY/ALDH1A3/SFRP4/TXNIP/TGFB1/SFRP1/ABL1/SFRP2/RNF122/CD248/THBS1/KLF11/HIP1/ITGA1/LRRK2/PINK1/FGD1/PHLDA3/P2RX7/CCL2/SEPTIN7/NLRP1/PTN/GRIK5/NGF/RHOB/RASSF2/KCNMA1/PREX1/NOX4/PNMA1/AKAP1…	BP
regulation of neuron projection development	262/7182	458/17910	5.64983e-14	2.35373e-12	1.75982e-12	262	ZEB2/NR2F1/PMP22/SLIT2/DLG4/PRKD1/DENND5A/SDC2/SERPINF1/FZD4/ARSB/LPAR1/APBB1/SPART/LZTS1/NFATC4/HGF/MEF2C/PRRX1/ISLR2/CAMK1D/FEZ1/THY1/NRP1/DPYSL3/VIM/FZD1/EPHA3/MAGI2/NLGN3/ROBO1/MAP1B/CXCL12/SHANK3/BMPR2/NEGR1/LRP1/FYN/SCN1B/SEMA3G/TRAK2/RGMA/SFRP1/MYO9A/PRKN/ABL1/PLXNA4/SFRP2/DPYSL2/LRRK2/SYNGAP1/FGFR1/MACF1/ILK/CRMP1/CRTC1/PTN/NGF/ULK2/LGALS1/PREX1/ITSN1/CREB3L2/SARM1/NTN1/SCARF1/P3H1/MYLIP/…	BP
catabolic process	1095/7182	2320/17910	6.53829e-14	2.71339e-12	2.02872e-12	1095	PDE1A/FBXL7/GGT5/DCN/ENTPD1/TNFSF12/ITPR1/HTR2A/CPQ/GPC6/LUM/PRICKLE1/CYP1B1/PRKD1/OMD/DACT1/SDC2/ARSB/DAB2/KCTD10/MAP1A/LZTS1/PRELP/TIMP3/ECSCR/HGF/WWTR1/COL15A1/MRC2/FEZ1/GPRASP1/OGN/LEPR/RNF217/SPSB1/PDE2A/RASIP1/PDE5A/VIM/MSN/SRPX/CTSK/BGN/PDE7B/BCL2/STING1/HSPG2/SOX17/VCAN/PIP4K2A/CDO1/MID2/NOD1/USP51/FTO/LRP1/ASPA/TGFB1I1/FYN/SMPD1/CD81/PKD1/FGF2/TGFB1/RARRES2/DYSF/TECPR2/SOCS5/SNX1/PRKN/AB…	BP
response to wounding	360/7182	665/17910	6.81425e-14	2.81708e-12	2.10625e-12	360	A2M/JAM3/DCN/CD34/PECAM1/ENTPD1/PDGFRB/GLI1/ITPR1/SELP/SERPING1/CPQ/ZFPM2/TBXA2R/SYT11/FBLN1/TGFB3/EHD2/GLI3/PRKG1/FGF7/ACVRL1/NRP1/DPYSL3/PEAR1/F8/MCAM/ELK3/FOXF1/BCL2/VASH1/VWF/MAP1B/MYH10/PHF21A/SPARC/TGFBR2/PDGFRA/CCN2/LAMB2/GSN/TLN1/DOCK11/LRP1/PRKCH/MMRN1/FYN/CD81/F2R/NOTCH4/ITGA9/FGF2/SMOC2/TGFB1/DYSF/COL5A1/RIPOR1/RGMA/PHLDB2/SH2B3/PIK3R1/PRCP/GAS6/ETS1/THBD/GNA12/PLAT/MTR/THBS1/PRKCB/SGC…	BP
positive regulation of transcription by RNA polymerase II	528/7182	1031/17910	7.18873e-14	2.96055e-12	2.21352e-12	528	ERG/ZEB2/S1PR1/TCF4/NDN/NR3C1/NR2F1/DCN/PKD2/GLI1/TCF21/HEYL/ENG/LUM/PRKD1/ZFPM2/MEOX2/APBB1/TGFB3/MAF/GREM1/RHOQ/AR/GLIS2/HGF/MEF2C/GLI3/ZEB1/PRRX1/WWTR1/GLI2/FLI1/STAT5B/RORA/ACVRL1/NFIA/ELK3/MAFB/CREBRF/KLF7/CALCOCO1/FOXF1/PBX1/STING1/SKI/SOX17/BMPR2/MEIS1/EPAS1/PBX3/MEF2D/NOTCH3/MEIS3/EZH1/CD81/SMO/PKD1/MEF2A/NOTCH4/PYGO1/FGF2/CDON/TGFB1/FGF1/IRF2BPL/RGMA/MITF/PRKN/PIK3R1/ABL1/SFRP2/NFIC/NFIX…	BP
establishment of protein localization	870/7182	1803/17910	8.75201e-14	3.59065e-12	2.68463e-12	870	MAPK10/LRRC32/CD34/RAMP3/ITPR1/VEGFC/DLG4/COPZ2/RAMP2/PRICKLE1/MDFIC/CAVIN1/LTBP2/RAB31/CD200/NLGN2/SYT11/DAB2/APBB1/TGFB3/MAP1A/SSC5D/MCC/GLI3/STOM/CLIP3/SYNDIG1/LEPROT/KLF7/ANGPT1/DZIP1/PPM1F/RAB3IL1/ANK2/RILPL1/PKIG/BCL2/CSF1R/MYH10/NEURL1B/GJA5/FRMD4A/LRP1/C1QTNF4/NACAD/FCHSD2/FYN/CD81/F2R/SMO/DENND2A/ARL2BP/ADCY5/PKD1/TXNIP/CALCRL/TGFB1/DYSF/RIPOR1/AP1M1/RAB8B/SFRP1/PHLDB2/VPS35L/SNX1/PRKN/P…	BP
intracellular transport	757/7182	1546/17910	9.73965e-14	3.98071e-12	2.97626e-12	757	MAPK10/RAMP3/HTR2A/COPZ2/RAMP2/PRICKLE1/MDFIC/DENND5A/LTBP2/DAB2/MAP1A/EHD2/BACE1/GLI3/STOM/FEZ1/GPRASP1/SYNDIG1/F8/LEPROT/TUB/ANGPT1/DYNC2H1/MSN/ANK2/RILPL1/PKIG/FOXF1/ATXN1/MAP1B/TUBA1A/MYH10/FYN/SUN2/CD81/SMO/DENND2A/PKD1/TXNIP/TGFB1/TRAK2/RIPOR1/AP1M1/RAB8B/VPS35L/SNX1/PIP5K1C/PRKN/PIK3R1/KLHL20/GAS6/PURA/FYCO1/WLS/SNX18/GAS1/SUFU/HIP1/CRYAB/LRRK2/ABCA1/PRKCB/HOOK3/RAB12/PINK1/VAMP2/P2RX7/DLG…	BP
endocytosis	364/7182	675/17910	1.01447e-13	4.13063e-12	3.08835e-12	364	RAMP3/PECAM1/DLG4/RAMP2/PRKD1/CD302/RAB31/SYT11/DAB2/COLEC12/EHD2/GREM1/MARCHF2/STAB1/CAMK1D/MRC2/CD93/LEPR/CLIP3/C4A/PEAR1/TUB/MFGE8/ANGPT1/SRPX/ANK2/EPHA3/MAGI2/NLGN3/STON1/HSPG2/SPARC/TGFBR2/NEURL1B/SGIP1/GSN/GHR/LRP1/FCHSD2/FYN/CD81/SFRP4/RIN3/WIPF1/CALCRL/TGFB1/RSPO1/DYSF/C4B/SNX1/PIP5K1C/PIK3R1/ABL1/CLEC10A/DPYSL2/GAS6/AMPH/SNX18/THBS1/FOLR2/HIP1/LRRK2/ABCA1/P2RX7/FCGR2B/CCL2/ELMO1/MCTP1/WA…	BP
negative regulation of nucleic acid-templated transcription	575/7182	1137/17910	1.04171e-13	4.22559e-12	3.15935e-12	575	ZEB2/MAPK10/HIC1/NR3C1/JAZF1/NR2F1/TCF21/HEYL/POU6F1/BEND6/PRICKLE1/MDFIC/RUNX1T1/ZFPM2/ZNF423/DACT1/FOXN3/DAB2/TCEAL7/ZBTB4/APBB1/AEBP1/NFATC4/MAF/GREM1/EID1/AR/GLIS2/MEF2C/GLI3/ZEB1/PRRX1/WWTR1/GLI2/ZNF366/RBFOX2/WWC3/DKK3/ELK3/PDE2A/KANK2/KLF7/PPM1F/CBX7/FZD1/PKIG/MSC/BCL6B/PBXIP1/FOXF1/FOXS1/ATXN1/SKI/TWIST2/BEND5/PRMT2/CBX6/HCFC2/TLE4/NOTCH3/ARID5A/WTIP/SFMBT2/EZH1/SMO/MEF2A/TXNIP/LBH/TGFB1/…	BP
secretion by cell	714/7182	1449/17910	1.04744e-13	4.23291e-12	3.16482e-12	714	A2M/TIMP2/LRRC32/CD34/PECAM1/ITPR1/VEGFC/SELP/HTR2A/SERPING1/ENG/CAVIN1/ISLR/LTBP2/RAB31/CRISPLD2/CD200/NLGN2/SYT11/FZD4/ARSB/PLEKHO2/APBB1/TGFB3/BACE1/SSC5D/TIMP3/HGF/MEF2C/STOM/NRXN2/FGF7/CD93/F8/KLF7/ANGPT1/FOXF1/CYB5R3/VWF/STING1/CSF1R/ATP8B4/MYH10/CXCL12/SPARC/PTPRB/CCN2/GJA5/GNAI2/LTBP4/GSN/TLN1/FRMD4A/LRP1/C1QTNF4/NISCH/MMRN1/SELENOM/F2R/LHFPL2/ARL2BP/ADCY5/VEGFB/TGFB1/RARRES2/DYSF/AP1M1/R…	BP
animal organ morphogenesis	508/7182	989/17910	1.15702e-13	4.6583e-12	3.48288e-12	508	TEK/S1PR1/MGP/HEG1/DCN/COL8A1/CD34/ELN/PTPRM/PKD2/PDGFRB/AKT3/SLIT2/GLI1/FBN1/COL8A2/VEGFC/TCF21/HEYL/DCHS1/ENG/GPC6/PRICKLE1/FLRT2/ZFPM2/DACT1/DLC1/FOXN3/FZD4/IGFBP5/DAB2/THBS3/TGFB3/GREM1/EFEMP1/AR/SLIT3/HGF/MEF2C/GLI3/ZEB1/PRRX1/WWTR1/FAT4/GLI2/FLI1/FAM20C/FGF7/RSPO3/ACVRL1/THY1/FRZB/PARVA/NRP1/CYP7B1/TMEM119/ADARB1/MAFB/ASPN/MSN/ROR2/FZD1/NOTCH2/ANKRD6/FOXF1/BCL2/MAGI2/PBX1/ROBO1/SKI/CSF1R/SO…	BP
cell morphogenesis involved in neuron differentiation	281/7182	500/17910	1.29934e-13	5.21186e-12	3.89676e-12	281	ZEB2/NDN/CNTN4/LAMA2/PTPRM/PREX2/BOC/SLIT2/CDH11/DLG4/DOK6/FLRT2/SDC2/APBB1/SPART/LZTS1/DOK5/NFATC4/SLIT3/MEF2C/GLI3/ISLR2/GLI2/FEZ1/THY1/RBFOX2/NRP1/ADARB1/KLF7/BCL2/NLGN3/ROBO1/MAP1B/CSF1R/MYH10/CXCL12/SHANK3/BMPR2/MAP6/LAMB2/LRP1/NUMBL/GAB1/FYN/MEF2A/SCN1B/SEMA3G/ATL1/EVL/TRAK2/PIK3R1/ABL1/PLXNA4/DPYSL2/NRP2/SEMA6C/GFRA2/LRRK2/SYNGAP1/MATN2/GFRA1/MACF1/ILK/CRMP1/PTN/NGF/ULK2/ISL1/PDLIM7/SARM1/…	BP
negative regulation of RNA biosynthetic process	575/7182	1139/17910	1.57194e-13	6.28196e-12	4.69684e-12	575	ZEB2/MAPK10/HIC1/NR3C1/JAZF1/NR2F1/TCF21/HEYL/POU6F1/BEND6/PRICKLE1/MDFIC/RUNX1T1/ZFPM2/ZNF423/DACT1/FOXN3/DAB2/TCEAL7/ZBTB4/APBB1/AEBP1/NFATC4/MAF/GREM1/EID1/AR/GLIS2/MEF2C/GLI3/ZEB1/PRRX1/WWTR1/GLI2/ZNF366/RBFOX2/WWC3/DKK3/ELK3/PDE2A/KANK2/KLF7/PPM1F/CBX7/FZD1/PKIG/MSC/BCL6B/PBXIP1/FOXF1/FOXS1/ATXN1/SKI/TWIST2/BEND5/PRMT2/CBX6/HCFC2/TLE4/NOTCH3/ARID5A/WTIP/SFMBT2/EZH1/SMO/MEF2A/TXNIP/LBH/TGFB1/…	BP
regulation of actin filament organization	146/7182	228/17910	1.8954e-13	7.51979e-12	5.62233e-12	146	S1PR1/ELN/KIRREL1/SLIT2/DLC1/LPAR1/TGFB3/ARHGEF15/NRP1/PPM1F/CXCL12/SHANK3/MYADM/CCN2/ADD1/GSN/FCHSD2/SH3PXD2B/JMY/EVL/SFRP1/PHLDB2/TMOD2/PRKN/PIK3R1/ABL1/TMOD1/WASF2/LMOD1/PREX1/NOX4/FLNA/FER/ASAP3/SORBS3/RGS4/RDX/ARHGAP6/PLEKHH2/GPR65/PLEKHG2/TACR1/CFL2/TGFBR1/TPM1/ABI2/DSTN/SWAP70/NCKAP1L/HCLS1/TRIOBP/CORO2B/CLASP1/MAGEL2/INPP5K/PAK3/ARAP1/FHOD3/WASF1/ARPIN/ROCK1/BBS4/PRKCE/WASHC2C/MYO1C/CCR7/…	BP
negative regulation of cellular component organization	362/7182	673/17910	1.89563e-13	7.51979e-12	5.62233e-12	362	S1PR1/NR2F1/EMILIN1/PMP22/LDLRAD4/SLIT2/DLG4/PRKD1/DENND5A/DACT1/DLC1/SYT11/FBLN1/LPAR1/ARHGEF15/SPART/NFATC4/AR/HGF/ANTXR1/FEZ1/ACVRL1/THY1/CLIP3/NRP1/DPYSL3/NAV3/VIM/EPHA3/TTBK2/HDGFL3/NLGN3/SKI/MAP1B/SHANK3/MYADM/ADD1/GSN/LRP1/BMERB1/FYN/SEMA3G/TGFB1/EVL/DYSF/TRAK2/RGMA/PHLDB2/TMOD2/PRKN/TMOD1/THBS1/PHF1/CRYAB/FAM107A/MAP4/LRRK2/SYNGAP1/PINK1/FCGR2B/CRMP1/TINF2/MCTP1/APOD/PTN/ULK2/WASF2/IGF1/L…	BP
regulation of cell activation	297/7182	535/17910	2.03942e-13	8.06058e-12	6.02666e-12	297	LRRC32/IL6ST/EMILIN1/PDGFRB/SELP/CD200/CYGB/MEF2C/GLI3/ZEB1/GLI2/PRKG1/STAT5B/RORA/THY1/PDE5A/FOXF1/BCL2/TGFBR2/PDGFRA/CCN2/PJA2/GSN/GPR183/FYN/CD81/ADGRF5/HLX/TGFB1/TWSG1/SFRP1/LOXL3/SH2B3/SOCS5/PIK3R1/ABL1/GAS6/THBD/THBS1/LRRK2/FCGR2B/TNFSF8/CCL2/DUSP3/ZMIZ1/CD1D/IGF1/LGALS1/FGF10/IL33/FER/MILR1/ZBTB16/ITPKB/C1QTNF1/GPNMB/AXL/PIK3R6/ZFP36L1/FES/CYLD/DUSP22/PIK3CA/CD4/VCAM1/TMEM131L/CD28/TACR1/S…	BP
small molecule metabolic process	958/7182	2012/17910	2.52202e-13	9.9316e-12	7.42557e-12	958	PDE1A/CYP2U1/QKI/HACD4/GUCY1B1/GGT5/GUCY1A1/DCN/ENTPD1/CSGALNACT2/HTR2A/NPR2/C1QTNF2/LUM/CYP1B1/CRTAP/OMD/PTGIS/ARSB/IGFBP5/PRELP/RHOQ/BHMT2/CYGB/ITIH5/HGF/IGFBP4/FAM20C/STAT5B/RORA/OGN/LEPR/CYP7B1/DKK3/CHST7/PDE2A/ANGPT1/PDE5A/CH25H/ADCY4/BGN/PDE7B/CYB5R3/CHSY3/VCAN/CDO1/ADCY9/DSEL/GIMAP7/GHR/NISCH/DSE/ASPA/NPR1/SMPD1/NDST1/ALDH1A3/ADCY5/FGF2/TGFB1/GUCY1A2/FGF1/DYSF/ISCU/ST3GAL3/PRKN/PTH1R/CHST1…	BP
positive regulation of organelle organization	323/7182	591/17910	2.73671e-13	1.07378e-11	8.02837e-12	323	TEK/DCN/PDGFRB/KIRREL1/PRKD1/LPAR1/TGFB3/ARHGEF15/NRP1/NAV3/LEPROT/DZIP1/MSN/PPM1F/BCL2/MAP1B/PIP4K2A/CCN2/GSN/FCHSD2/SH3PXD2B/JMY/TGFB1/EVL/NAP1L2/SFRP1/ANKRD53/PRKN/ABL1/FYCO1/PHF1/LRRK2/PINK1/P2RX7/JDP2/SEPTIN7/KDR/ISL1/IGF1/LMOD1/NOX4/FLNA/FER/MECP2/SORBS3/ATL3/UVRAG/CEP120/GPR65/ADRB2/TAL1/FES/POC1A/NIN/CD28/TACR1/SNAI2/CFL2/TGFBR1/TPM1/TFDP2/TOGARAM1/BCL6/WDR35/CROCC/ABI2/DSTN/CCNB1/ATM/CCD…	BP
regulation of leukocyte activation	276/7182	492/17910	2.87441e-13	1.12373e-11	8.40177e-12	276	LRRC32/IL6ST/CD200/MEF2C/GLI3/ZEB1/GLI2/STAT5B/RORA/THY1/PDE5A/FOXF1/BCL2/TGFBR2/PJA2/GSN/GPR183/FYN/CD81/ADGRF5/HLX/TGFB1/TWSG1/SFRP1/LOXL3/SOCS5/PIK3R1/ABL1/GAS6/THBS1/LRRK2/FCGR2B/TNFSF8/CCL2/DUSP3/ZMIZ1/CD1D/IGF1/LGALS1/FGF10/IL33/FER/MILR1/ZBTB16/ITPKB/GPNMB/AXL/PIK3R6/ZFP36L1/FES/CYLD/DUSP22/PIK3CA/CD4/VCAM1/TMEM131L/CD28/TACR1/MERTK/CCL19/AIF1/PRNP/NLRP3/GATA2/TLR4/BCL6/PRAM1/ITGAM/ATM/DTX…	BP
protein localization to cell periphery	170/7182	276/17910	3.28418e-13	1.27929e-11	9.56488e-12	170	MAPK10/RAMP3/DCHS1/GPC6/RAMP2/RAB31/DAB2/EHD2/RHOQ/AR/PALM/CLIP3/ANK2/RILPL1/TTC7B/EPHA3/MYADM/LRP1/PRKCH/CD81/TGFB1/PIK3R1/GAS6/TMEM88/VAMP2/MACF1/DLG2/CACNB2/SORBS1/EPB41L3/PID1/FLNA/MYO5A/GNAI1/KCNB1/NFASC/PACS1/RDX/ITGB1/SEC23A/RAP1A/FAM126A/EPB41L2/ARL6/PKP3/CNPY4/RABEP1/RILPL2/RAB34/ARHGEF16/CNST/KRT18/RAB29/MMP14/SAPCD2/PICALM/INPP5K/EZR/KCNIP3/TREM2/GRIN2A/VTI1B/DPP6/EHD3/SLMAP/F11R/ROCK1…	BP
negative regulation of transcription by RNA polymerase II	389/7182	735/17910	5.1046e-13	1.98125e-11	1.48132e-11	389	ZEB2/MAPK10/HIC1/NR3C1/JAZF1/NR2F1/TCF21/HEYL/POU6F1/DACT1/ZBTB4/APBB1/AEBP1/NFATC4/MAF/EID1/AR/GLIS2/MEF2C/GLI3/ZEB1/PRRX1/WWTR1/GLI2/ZNF366/WWC3/ELK3/PDE2A/KANK2/KLF7/CBX7/PKIG/MSC/BCL6B/FOXF1/FOXS1/SKI/CBX6/HCFC2/TLE4/NOTCH3/ARID5A/EZH1/SMO/MEF2A/TXNIP/TGFB1/NR2F2/IRF2BPL/EDNRB/MITF/PRKN/NFIC/NFIX/PURA/KLF11/SUFU/DUSP26/HDAC5/PRDM5/CRY2/FGFR1/JDP2/LMCD1/HOXD8/PCBP3/ISL1/SOX18/MXD4/HDAC7/ZBTB20…	BP
muscle structure development	348/7182	647/17910	5.67922e-13	2.18983e-11	1.63727e-11	348	QKI/S1PR1/EVC/LAMA2/HEG1/DCN/ELN/BOC/PDGFRB/GLI1/TCF21/HEYL/ENG/POU6F1/RAMP2/PRICKLE1/MRAS/ZFPM2/SYNE1/MEOX2/IGFBP5/PLPP7/EHD2/NFATC4/GREM1/MEF2C/ZEB1/SGCD/RORA/COL6A3/TMEM119/ADARB1/ANK2/FZD1/MSC/FOXF1/BCL2/SKI/SOX17/MYH10/TGFBR2/PDGFRA/MEIS1/EPAS1/MEF2D/SMARCD3/PRDM6/SGCE/CD81/PLEKHO1/SMO/HLX/MEF2A/FGF2/MBNL1/CDON/TGFB1/NR2F2/DYSF/FHL3/ITGA7/EDNRB/ABL1/SGCB/CRYAB/HDAC5/SGCA/TGFBR3/CACNA1H/UTRN/…	BP
response to hormone	473/7182	919/17910	5.68259e-13	2.18983e-11	1.63727e-11	473	IGFBP7/PLPP1/TEK/NR3C1/NR2F1/RAMP3/PDGFRB/SLIT2/FBN1/TCF21/FIBIN/HEYL/ENG/RAMP2/TBXA2R/RAB31/SERPINF1/IGFBP5/DAB2/DHH/TGFB3/RHOQ/AR/SLIT3/MEF2C/GLP2R/PTGFR/ZNF366/STAT5B/RORA/LEPR/RBFOX2/CYP7B1/RERG/LEPROT/KANK2/CREBRF/TUB/MSN/CALCOCO1/ADCY4/KLF9/SESN3/BCL2/MAP1B/CXCL12/SPARC/CDO1/TGFBR2/CCN2/ADCY9/GNAI2/PRMT2/GHR/TGFB1I1/GAB1/FYN/LMO3/SFRP4/LATS2/ADCY5/TXNIP/LBH/TGFB1/RARRES2/NR2F2/SNRPN/EDNRB/S…	BP
negative regulation of transcription, DNA-templated	547/7182	1083/17910	5.79763e-13	2.22621e-11	1.66447e-11	547	ZEB2/MAPK10/HIC1/NR3C1/JAZF1/NR2F1/TCF21/HEYL/POU6F1/PRICKLE1/MDFIC/RUNX1T1/ZFPM2/ZNF423/DACT1/FOXN3/DAB2/TCEAL7/ZBTB4/APBB1/AEBP1/NFATC4/MAF/GREM1/EID1/AR/GLIS2/MEF2C/GLI3/ZEB1/PRRX1/WWTR1/GLI2/ZNF366/RBFOX2/WWC3/DKK3/ELK3/PDE2A/KANK2/KLF7/PPM1F/CBX7/FZD1/PKIG/MSC/BCL6B/PBXIP1/FOXF1/FOXS1/ATXN1/SKI/TWIST2/BEND5/PRMT2/CBX6/HCFC2/TLE4/NOTCH3/ARID5A/EZH1/SMO/MEF2A/TXNIP/LBH/TGFB1/NR2F2/IRF2BPL/EDNR…	BP
cell activation involved in immune response	367/7182	688/17910	5.88067e-13	2.25008e-11	1.68232e-11	367	TIMP2/PECAM1/RAB31/CRISPLD2/ARSB/PLEKHO2/STOM/RORA/CD93/NOTCH2/FOXF1/CYB5R3/STING1/ATP8B4/PTPRB/GSN/GPR183/DOCK11/LRP1/CD81/HLX/TGFB1/DYSF/AP1M1/VPS35L/LOXL3/SOCS5/ABL1/PRCP/YPEL5/ITM2A/VAMP2/FCGR2B/LGALS1/C3/LAIR1/FGL2/IL33/DEGS1/VCL/ITGAV/FER/MILR1/DOCK10/ANO6/NFASC/RAB9B/STK10/RAP1A/CD1C/GLIPR1/FES/FOXP1/C3AR1/KIT/CD14/CD28/BST1/CCL19/VAT1/METTL7A/GYG1/NLRP3/GATA2/TLR4/BCL6/HGSNAT/GMFG/PRSS3/P…	BP
axon development	249/7182	438/17910	6.09932e-13	2.3255e-11	1.73871e-11	249	ZEB2/NDN/CNTN4/JAM3/LAMA2/PTPRM/BOC/SLIT2/CDH11/DOK6/FLRT2/APBB1/SPART/DOK5/SLIT3/GLI3/ISLR2/GLI2/FEZ1/THY1/NRP1/ADARB1/KLF7/EPHA3/BCL2/NLGN3/ROBO1/MAP1B/CSF1R/MYH10/CXCL12/SHANK3/BMPR2/LAMB2/LRP1/NUMBL/GAB1/FYN/SCN1B/SEMA3G/ATL1/EVL/TRAK2/RGMA/PIK3R1/ABL1/PLXNA4/DPYSL2/NRP2/SEMA6C/GFRA2/MTR/SYNGAP1/TSPAN2/MATN2/GFRA1/MACF1/ILK/CRMP1/APOD/PTN/NGF/ULK2/ISL1/PDLIM7/NCAM2/VCL/NTN1/SCARF1/UNC5C/TCTN1…	BP
response to abiotic stimulus	595/7182	1191/17910	6.7473e-13	2.5635e-11	1.91665e-11	595	IGFBP7/MAPK10/TEK/SYNPO/DCN/CD34/PKD2/PDGFRB/ITPR1/HTR2A/MFAP4/ENG/RAMP2/EDNRA/SERPINF1/PTGIS/ARSB/LPAR1/TGFB3/BACE1/NFATC4/SOD3/CYGB/PALM/NRXN2/LRRC8C/RORA/ACVRL1/PDE2A/SCARA3/BCL2/NLGN3/MAP1B/CXCL12/SHANK3/SPARC/TGFBR2/CCN2/EPAS1/WTIP/TGFB1I1/FYN/PKD1/TXNIP/TGFB1/FGF1/DYSF/SFRP1/PDE1B/PIK3R1/SFRP2/ETS1/THBD/DNAJB4/PLAT/THBS1/CRYAB/SYNGAP1/NSMCE3/PINK1/TGFBR3/CRY2/P2RX7/COX4I2/TMEM109/POLK/CIRBP…	BP
negative regulation of RNA metabolic process	605/7182	1214/17910	7.53532e-13	2.85285e-11	2.13299e-11	605	ZEB2/MAPK10/HIC1/NR3C1/JAZF1/NR2F1/TCF21/HEYL/POU6F1/BEND6/PRICKLE1/MDFIC/RUNX1T1/ZFPM2/ZNF423/DACT1/FOXN3/DAB2/TCEAL7/ZBTB4/APBB1/AEBP1/NFATC4/MAF/GREM1/EID1/AR/GLIS2/MEF2C/GLI3/ZEB1/PRRX1/WWTR1/GLI2/ZNF366/RBFOX2/WWC3/DKK3/ELK3/PDE2A/KANK2/KLF7/PPM1F/CBX7/FZD1/PKIG/MSC/BCL6B/PBXIP1/FOXF1/FOXS1/ATXN1/SKI/TWIST2/BEND5/PRMT2/CBX6/HCFC2/TLE4/NOTCH3/ARID5A/WTIP/SFMBT2/EZH1/SMO/MEF2A/TXNIP/LBH/TGFB1/…	BP
positive regulation of protein serine/threonine kinase activity	192/7182	322/17910	7.97234e-13	3.00774e-11	2.2488e-11	192	ZEB2/MAPK10/MAP3K3/PKD2/PDGFRB/HTR2A/MAP3K12/C1QTNF2/MDFIC/FZD4/LPAR1/TGFB3/HGF/PEA15/PDE5A/ROR2/ROBO1/CSF1R/NRK/NOD1/GHR/CD81/F2R/PKD1/FGF2/TGFB1/FGF1/THBS1/ITGA1/LRRK2/P2RX7/FGFR1/ILK/SASH1/NGF/IGF1/ATP2B4/FZD8/FGF10/NOX4/CKS2/CSPG4/RAPGEF1/SHC2/MAPK11/PIK3R5/PIK3R6/ADRB2/KIT/CDK1/CCL19/GADD45B/TGFBR1/MAP3K20/FLT1/TLR4/MAP3K14/HTR2B/CCNB1/FAM20A/FGD2/KIDINS220/PKN1/SHC1/TIAM1/CXCR4/AKAP13/MST1R…	BP
homeostatic process	832/7182	1730/17910	8.50802e-13	3.19866e-11	2.39154e-11	832	CYBRD1/S1PR1/NDN/CLIC2/SYNPO/JAM3/TNS2/DCN/CD34/RAMP3/PKD2/AKT3/ITPR1/HTR2A/DLG4/TXNDC15/LAMA4/EDNRA/PLCL1/ZNF423/SERPINF1/LDB2/IGFBP5/S1PR3/LPAR1/CYSLTR1/MAP1A/TRPC1/MEF2C/WWTR1/NOVA2/LRRC8C/STAT5B/CLIC4/SGCD/RORA/THY1/LEPR/RBFOX2/TMEM119/MAFB/ATP1B2/KLF7/TUB/CTSK/ANK2/ADCY4/SESN3/BCL2/PTGER3/C7/CSF1R/APLNR/CXCL12/SHANK3/SGIP1/PDGFRA/CCN2/ADCY9/ADD1/GJA5/EPAS1/GNAI2/SCN2B/GPR183/FTO/DOCK11/SLC39…	BP
neuron projection morphogenesis	306/7182	559/17910	9.05793e-13	3.38184e-11	2.5285e-11	306	ZEB2/NDN/CNTN4/LAMA2/PTPRM/PREX2/BOC/SLIT2/CDH11/DLG4/DOK6/FLRT2/SDC2/FZD4/APBB1/SPART/LZTS1/DOK5/NFATC4/SLIT3/GLI3/ISLR2/GLI2/FEZ1/THY1/RBFOX2/NRP1/ADARB1/KLF7/CNTNAP1/BCL2/NLGN3/ROBO1/MAP1B/CSF1R/MYH10/CXCL12/SHANK3/BMPR2/MAP6/LAMB2/LRP1/NUMBL/GAB1/FYN/MEF2A/SCN1B/SEMA3G/ATL1/EVL/TRAK2/MYO9A/PRKN/PIK3R1/ABL1/PLXNA4/DPYSL2/NRP2/SEMA6C/GFRA2/ITGA1/LRRK2/SYNGAP1/MATN2/GFRA1/MACF1/ILK/CRMP1/PTN/NGF…	BP
cellular response to organonitrogen compound	306/7182	559/17910	9.05793e-13	3.38184e-11	2.5285e-11	306	PKD2/SLIT2/FBN1/RAB31/IGFBP5/BACE1/RHOQ/MEF2C/ZEB1/GLP2R/STAT5B/PDE2A/LEPROT/VIM/ADCY4/SESN3/MAP1B/PDGFRA/NOD1/ADCY9/GNAI2/GHR/LRP1/GAB1/FYN/ADCY5/TGFB1/RARRES2/SFRP1/PRKN/PIK3R1/ABL1/PDE3A/PDGFC/COL6A1/LDOC1/KLF11/FOLR2/HDAC5/LRRK2/PRKCB/ATP6V1G2/VAMP2/P2RX7/FCGR2B/RRAGB/MMP2/COL16A1/SSH1/IGF1/COL1A2/COL3A1/P2RY12/SLC8A1/ATP2B4/PRKACB/SORBS1/KLF10/PID1/NOX4/KAT2B/MYO5A/FER/COL4A1/RAPGEF1/PRKAR2B…	BP
embryo development	494/7182	968/17910	1.01356e-12	3.77113e-11	2.81957e-11	494	RECK/ZEB2/PHLDB1/LAMA2/HEG1/COL8A1/PKD2/GLI1/RAI2/FBN1/VEGFC/TCF21/DCHS1/ENG/LAMA4/PRICKLE1/TIE1/EDNRA/ZFPM2/MEOX2/DACT1/DLC1/TGFB3/GREM1/EFEMP1/MEOX1/AR/MEF2C/GLI3/ZEB1/PRRX1/GLI2/RSPO3/ACVRL1/FRZB/NRP1/TENM4/MAFB/ANGPT1/DYNC2H1/CC2D2A/COL4A2/ROR2/FZD1/CMTM3/FOXF1/VASH1/PBX1/SKI/SOX17/MYH10/APLNR/BMPR2/MYADM/NRK/TGFBR2/PDGFRA/ADD1/GJA5/EPAS1/TGFB1I1/SOBP/SMO/ADGRF5/HLX/ALDH1A3/PKD1/FGF2/MBNL1/CD…	BP
leukocyte activation involved in immune response	364/7182	684/17910	1.12013e-12	4.15332e-11	3.10532e-11	364	TIMP2/PECAM1/RAB31/CRISPLD2/ARSB/PLEKHO2/STOM/RORA/CD93/NOTCH2/FOXF1/CYB5R3/STING1/ATP8B4/PTPRB/GSN/GPR183/DOCK11/CD81/HLX/TGFB1/DYSF/AP1M1/VPS35L/LOXL3/SOCS5/ABL1/PRCP/YPEL5/ITM2A/VAMP2/FCGR2B/LGALS1/C3/LAIR1/FGL2/IL33/DEGS1/VCL/ITGAV/FER/MILR1/DOCK10/ANO6/NFASC/RAB9B/STK10/RAP1A/CD1C/GLIPR1/FES/FOXP1/C3AR1/KIT/CD14/CD28/BST1/CCL19/VAT1/METTL7A/GYG1/NLRP3/GATA2/TLR4/BCL6/HGSNAT/GMFG/PRSS3/PRAM1/…	BP
secretion	767/7182	1584/17910	1.31799e-12	4.87025e-11	3.64135e-11	767	FBLN5/A2M/TIMP2/LRRC32/CD34/PECAM1/ITPR1/VEGFC/SELP/HTR2A/SERPING1/ENG/CAVIN1/ISLR/LTBP2/RAB31/CRISPLD2/CD200/NLGN2/SYT11/FZD4/ARSB/PLEKHO2/APBB1/TGFB3/BACE1/SSC5D/TIMP3/HGF/MEF2C/STOM/NRXN2/FGF7/STAT5B/CD93/F8/KLF7/ANGPT1/FOXF1/CYB5R3/VWF/STING1/CSF1R/ATP8B4/MYH10/CXCL12/SPARC/CDO1/PTPRB/CCN2/GJA5/GNAI2/LTBP4/GSN/TLN1/FRMD4A/LRP1/C1QTNF4/NISCH/MMRN1/NPR1/SELENOM/F2R/LHFPL2/ARL2BP/ADCY5/VEGFB/TGF…	BP
regulation of cell junction assembly	69/7182	90/17910	1.64024e-12	6.04035e-11	4.51619e-11	69	TEK/DLC1/GREM1/ACVRL1/THY1/NRP1/PPM1F/EPHA3/PEAK1/GPBAR1/LRP1/PRKCH/SFRP1/PHLDB2/ABL1/THBS1/FAM107A/MACF1/DUSP3/APOD/KDR/COL16A1/DAPK3/RAPGEF1/CLDN5/ARHGAP6/GPM6B/RAP1A/PRKACA/LDB1/DUSP22/SNAI2/PTEN/GJA1/CORO1C/MMP14/CLASP1/ROCK1/MYO1C/CAV1/LIMCH1/RAPGEF2/LIMS1/TJP1/SNAI1/CLASP2/MYOC/RAP1B/AGT/FLOT1/MAP4K4/ITGB1BP1/EPHA2/IKBKB/RUNX1/SLC9A1/CAMSAP3/FZD5/IQGAP1/EFNA5/RHOA/S100A10/OCLN/RAC1/TSC1/ROC…	BP
response to chemical	2012/7182	4520/17910	1.70274e-12	6.24917e-11	4.67232e-11	2012	FBLN5/IGFBP7/FSTL1/PLPP1/CYBRD1/MAPK10/ADGRA2/TEK/S1PR1/MAP3K3/NDN/CLIC2/TIMP2/MMRN2/NR3C1/PLSCR4/GUCY1B1/CNTN4/LRRC32/IL6ST/JAM3/NR2F1/LAMA2/DCN/CD34/RAMP3/RFTN2/PTPRM/EMILIN1/PKD2/PTGIR/LDLRAD4/BOC/PDGFRB/INMT/LTBP1/SLIT2/TNFSF12/FBN1/VEGFC/SELP/HTR2A/TCF21/FIBIN/HEYL/DLG4/ENG/NPR2/DOK6/LUM/RAMP2/FLRT2/LOXL1/CYP1B1/PRKD1/TIE1/MRAS/IL1R1/ZNF423/TBXA2R/LTBP2/RAB31/LRRC70/SERPINF1/PTGIS/FZD4/ARSB/…	BP
cytokine production	400/7182	765/17910	2.28934e-12	8.37354e-11	6.26065e-11	400	LRRC32/IL6ST/HEG1/CD34/LTBP1/LUM/CYP1B1/IL1R1/CD200/SYT11/S1PR3/TGFB3/NFATC4/SSC5D/MAF/HGF/LURAP1/STAT5B/RORA/NAV3/ANGPT1/LTBP3/STING1/CSF1R/TRIL/NOD1/FLT4/LRP1/C1QTNF4/CD81/F2R/TGFB1/TWSG1/DYSF/SOCS5/PIK3R1/ABL1/GAS6/THBS1/NRROS/LRRK2/ABCA1/P2RX7/FGFR1/FCGR2B/NLRP1/ZNF287/APOD/ISL1/IGF1/ARNT/HDAC7/TLR7/ZBTB20/MR1/ABCD2/C3/AKAP12/RFTN1/SPON2/IL33/ITGAV/LY96/SULF1/CREBBP/CCM2L/GPNMB/IL17D/AXL/CARD…	BP
protein transport	811/7182	1689/17910	2.65032e-12	9.66114e-11	7.22335e-11	811	MAPK10/LRRC32/CD34/RAMP3/ITPR1/VEGFC/COPZ2/RAMP2/PRICKLE1/MDFIC/CAVIN1/LTBP2/RAB31/CD200/NLGN2/SYT11/DAB2/APBB1/TGFB3/MAP1A/SSC5D/GLI3/STOM/CLIP3/SYNDIG1/LEPROT/KLF7/ANGPT1/PPM1F/RAB3IL1/ANK2/RILPL1/PKIG/CSF1R/MYH10/NEURL1B/GJA5/FRMD4A/LRP1/C1QTNF4/NACAD/FCHSD2/FYN/CD81/F2R/SMO/DENND2A/ARL2BP/ADCY5/PKD1/TXNIP/CALCRL/TGFB1/DYSF/RIPOR1/AP1M1/RAB8B/SFRP1/VPS35L/SNX1/PRKN/PIK3R1/ABL1/KLHL20/GAS6/PURA…	BP
establishment or maintenance of cell polarity	114/7182	172/17910	2.98766e-12	1.08541e-10	8.11533e-11	114	TEK/JAM3/CDH5/CYTH3/CLIC4/FEZ1/PARVA/MSN/FOXF1/MAP1B/GSN/FRMD4A/PKD1/SPRY1/MYO9A/MAP4/ILK/FGF10/MYH9/AQP1/PAFAH1B1/CCL19/RUFY3/MAD2L1/BRSK1/NCKAP1L/SAPCD2/CENPA/DST/CLASP1/MAP2/TCF15/DOCK8/MARK1/RNF41/DCTN1/ROCK1/PLK1/ARHGEF2/CCR7/KIF2C/NUMA1/PARVB/MAP7/SPINT2/SPN/RIPOR2/LLGL2/UST/DOCK2/CLASP2/GATA3/FAM89B/CYTH1/DLG5/KIF20B/RAP1B/CD3G/NDC80/PARD6B/WWC1/KANK1/SLC9A3R1/ARHGAP35/SNX27/HSP90AA1/FERMT…	BP
peptide transport	825/7182	1722/17910	3.03801e-12	1.10001e-10	8.22442e-11	825	MAPK10/LRRC32/CD34/RAMP3/ITPR1/VEGFC/COPZ2/RAMP2/PRICKLE1/MDFIC/CAVIN1/LTBP2/RAB31/CD200/NLGN2/SYT11/DAB2/APBB1/TGFB3/MAP1A/SSC5D/GLI3/STOM/CLIP3/SYNDIG1/LEPROT/KLF7/ANGPT1/PPM1F/RAB3IL1/ANK2/RILPL1/PKIG/CSF1R/MYH10/NEURL1B/GJA5/LTBP4/FRMD4A/LRP1/C1QTNF4/NACAD/FCHSD2/FYN/CD81/F2R/SMO/DENND2A/ARL2BP/ADCY5/PKD1/TXNIP/CALCRL/TGFB1/DYSF/RIPOR1/AP1M1/RAB8B/SFRP1/VPS35L/SNX1/PRKN/PIK3R1/ABL1/KLHL20/GAS…	BP
amide transport	838/7182	1752/17910	3.10051e-12	1.11888e-10	8.36553e-11	838	MAPK10/LRRC32/CD34/RAMP3/ITPR1/VEGFC/COPZ2/RAMP2/PRICKLE1/MDFIC/CAVIN1/LTBP2/RAB31/CD200/NLGN2/SYT11/DAB2/APBB1/TGFB3/MAP1A/SSC5D/GLI3/STOM/CLIP3/SYNDIG1/LEPROT/KLF7/ANGPT1/PPM1F/RAB3IL1/ANK2/RILPL1/PKIG/CSF1R/MYH10/NEURL1B/GJA5/LTBP4/FRMD4A/LRP1/C1QTNF4/NACAD/FCHSD2/FYN/CD81/F2R/SMO/DENND2A/ARL2BP/ADCY5/PKD1/TXNIP/CALCRL/TGFB1/DYSF/RIPOR1/AP1M1/RAB8B/SFRP1/VPS35L/SNX1/PRKN/PIK3R1/ABL1/KLHL20/GAS…	BP
skeletal system development	266/7182	479/17910	3.56562e-12	1.28244e-10	9.5884e-11	266	TEK/MGP/EVC/FBN1/CDH11/DCHS1/ENG/NPR2/LUM/FOXN3/THBS3/TGFB3/MAF/GREM1/PRELP/EFEMP1/MEF2C/GLI3/ZEB1/PRRX1/FAT4/GLI2/FLI1/FAM20C/ACVRL1/FRZB/TMEM119/TLL1/ROR2/CTSK/NOTCH2/PBX1/SKI/BMPR2/PIP4K2A/SPARC/TGFBR2/PDGFRA/LRRC17/MEIS1/CCN2/GJA5/MEF2D/SH3PXD2B/GDF6/SFRP4/PKD1/FGF2/TGFB1/SFRP1/SH2B3/SFRP2/PDGFC/PTH1R/WNT2B/SUFU/P2RX7/FGFR1/HOXD8/MMP2/WASF2/CHRDL2/IGF1/COL1A2/COL3A1/RASSF2/CREB3L2/SULF1/P3H1/…	BP
actin filament bundle organization	95/7182	137/17910	3.59883e-12	1.29008e-10	9.64556e-11	95	S1PR1/ELN/DLC1/LPAR1/TGFB3/ARHGEF15/NRP1/DPYSL3/PPM1F/SHANK3/CCN2/ADD1/SH3PXD2B/EVL/SFRP1/PHLDB2/PRKN/PIK3R1/ABL1/FAM107A/WASF2/ACTN1/SORBS1/NOX4/FLNA/ZYX/ASAP3/SORBS3/ITGB5/RDX/ARHGAP6/GPR65/MARCKS/TACR1/PHACTR1/AIF1/TGFBR1/TPM1/SRF/SWAP70/CORO2B/CLASP1/INPP5K/EZR/ARAP1/ARRB1/ROCK1/BBS4/ID1/ARHGEF10/LIMCH1/TAC1/SPIRE1/RGCC/ARHGEF5/NEDD9/CLASP2/SPIRE2/RAPGEF3/MYOC/USH1C/ITGB1BP1/CARMIL1/HSP90B1/P…	BP
ameboidal-type cell migration	250/7182	446/17910	4.28195e-12	1.52988e-10	1.14384e-10	250	ZEB2/SYDE1/ADGRA2/TEK/MAP3K3/CLEC14A/MMRN2/DCN/PECAM1/PTPRM/AKT3/SLIT2/TNFSF12/VEGFC/RHOJ/CYP1B1/PRKD1/MEOX2/DDR2/TBXA2R/SERPINF1/ARSB/GREM1/CYGB/MCC/MEF2C/FGF7/ACVRL1/NRP1/KANK2/ANGPT1/GLIPR2/PPM1F/VASH1/ROBO1/SOX17/TNS1/BMPR2/SPARC/TGFBR2/FLT4/AMOTL1/SMO/FGF2/SMOC2/TGFB1/NR2F2/FGF1/EVL/EDNRB/ABL1/NRP2/ETS1/GNA12/THBS1/HDAC5/IQSEC1/SRPX2/FGFR1/MACF1/ILK/BMPER/SASH1/PTN/KDR/RHOB/ISL1/WASF2/SOX18/…	BP
cytokine-mediated signaling pathway	398/7182	764/17910	5.09793e-12	1.8154e-10	1.35732e-10	398	S1PR1/MAP3K3/NDN/IL6ST/SLIT2/TNFSF12/IL1R1/FZD4/IL3RA/ACKR1/SLIT3/HGF/ZEB1/STAT5B/RORA/LEPR/CLIP3/CREBRF/ANGPT1/VIM/MSN/BCL2/IL34/ROBO1/CSF1R/CXCL12/NOD1/GHR/C1QTNF4/NUMBL/FYN/FGF2/TGFB1/SH2B3/SOCS5/PRKN/PIK3R1/GAS6/PLVAP/IL11RA/TNFSF8/CCL2/CSF1/ILK/MMP2/PXDN/COL1A2/CCDC3/IL33/FER/GREM2/RAPGEF1/AXL/CARD8/ITGB1/ACKR3/PRKACA/TRIM6/CCR4/CYLD/IL16/KIT/TIMP1/PIK3CA/TXNDC17/CD4/FN1/PAFAH1B1/VCAM1/CCL19…	BP
negative regulation of nucleobase-containing compound metabolic process	657/7182	1342/17910	5.3426e-12	1.89627e-10	1.41779e-10	657	ZEB2/MAPK10/HIC1/NR3C1/JAZF1/NR2F1/TCF21/HEYL/POU6F1/BEND6/PRICKLE1/MDFIC/RUNX1T1/ZFPM2/ZNF423/DACT1/FOXN3/DAB2/TCEAL7/ZBTB4/APBB1/AEBP1/NFATC4/MAF/GREM1/EID1/AR/GLIS2/MEF2C/GLI3/ZEB1/PRRX1/WWTR1/GLI2/ZNF366/ACVRL1/RBFOX2/WWC3/DKK3/ELK3/PDE2A/KANK2/KLF7/PPM1F/CBX7/FZD1/PKIG/MSC/BCL6B/PBXIP1/FOXF1/FOXS1/ATXN1/SKI/TWIST2/BMPR2/BEND5/PRMT2/CBX6/HCFC2/TLE4/NOTCH3/ARID5A/WTIP/SFMBT2/EZH1/SMO/MEF2A/TXN…	BP
response to external stimulus	1086/7182	2331/17910	5.60876e-12	1.98421e-10	1.48354e-10	1086	A2M/FSTL1/C1S/C1R/ADGRA2/TEK/S1PR1/PLSCR4/CNTN4/IL6ST/JAM3/GUCY1A1/LAMA2/DCN/CD34/PTPRM/PKD2/PTGIR/BOC/PDGFRB/SLIT2/CCDC80/VEGFC/SELP/HTR2A/SERPING1/ENG/DOK6/FLRT2/LOXL1/PRKD1/IL1R1/TBXA2R/CD200/SYT11/SERPINF1/PTGIS/ARSB/KCNJ8/HMCN1/LPAR1/CYSLTR1/CDH5/DOK5/BACE1/SSC5D/GREM1/STAB1/ABCC9/ECSCR/SLIT3/HGF/MEF2C/GLI3/GLI2/NRXN2/PTGFR/CAMK1D/PRKG1/FGF7/STAT5B/FEZ1/RORA/C4A/PARVA/NRP1/CYP7B1/PDE2A/ADARB…	BP
regulation of lymphocyte activation	228/7182	401/17910	5.66774e-12	1.99853e-10	1.49424e-10	228	LRRC32/IL6ST/MEF2C/GLI3/ZEB1/GLI2/STAT5B/THY1/PDE5A/BCL2/TGFBR2/GSN/GPR183/FYN/CD81/HLX/TGFB1/TWSG1/SFRP1/LOXL3/SOCS5/PIK3R1/ABL1/GAS6/FCGR2B/TNFSF8/CCL2/DUSP3/ZMIZ1/CD1D/IGF1/LGALS1/FGF10/ZBTB16/ITPKB/GPNMB/AXL/PIK3R6/ZFP36L1/CYLD/DUSP22/PIK3CA/CD4/VCAM1/TMEM131L/CD28/TACR1/MERTK/CCL19/AIF1/PRNP/NLRP3/TLR4/BCL6/ATM/DTX1/PRKAR1A/CD209/PKN1/TESPA1/IL4R/NCKAP1L/MMP14/NFATC2/IL7R/SOS1/CR1/VSIR/PAK3/…	BP
regulation of transcription by RNA polymerase II	1124/7182	2420/17910	5.74349e-12	2.01864e-10	1.50928e-10	1124	ERG/ZEB2/FSTL1/MAPK10/S1PR1/TCF4/NDN/ZNF521/HIC1/NR3C1/ZBTB47/JAZF1/NR2F1/DCN/BHLHE22/PKD2/GLI1/FBN1/TCF21/SETBP1/HEYL/ENG/POU6F1/LUM/PKNOX2/BNC2/ZNF135/PRKD1/ZFPM2/MEOX2/ZNF423/DACT1/FOXN3/ZBTB4/ZNF25/APBB1/TGFB3/AEBP1/NFATC4/MAF/GREM1/RHOQ/ZNF362/EID1/ZNF333/AR/GLIS2/HGF/MEF2C/GLI3/ZEB1/PRRX1/ZNF582/WWTR1/GLI2/CREBL2/FLI1/ZNF366/STAT5B/RORA/ACVRL1/ZNF354C/WWC3/NFIA/ZNF781/ELK3/PDE2A/MAFB/KANK2/…	BP
regulation of hemopoiesis	260/7182	468/17910	5.89334e-12	2.06458e-10	1.54363e-10	260	FBN1/MEF2C/GLI3/ZEB1/GLI2/STAT5B/RBFOX2/MAFB/ROR2/NOTCH2/IL34/TGFBR2/LRRC17/MEIS1/HLX/TGFB1/SFRP1/LOXL3/SOCS5/MITF/PIK3R1/ABL1/GAS6/ETS1/THBS1/PRKCB/FCGR2B/CSF1/ZMIZ1/PTN/ARNT/RASSF2/KLF10/KAT2B/AGO3/MYL9/ZBTB16/ITPKB/CREBBP/IL17D/AXL/NME1/PIK3R6/TFE3/ZFP36L1/TAL1/LDB1/FES/FOXP1/CYLD/TNRC6C/CD4/TNRC6A/TMEM131L/CD28/ZBTB46/CCL19/NLRP3/AGO4/GATA2/LOX/TLR4/BCL6/TNRC6B/DTX1/ATXN1L/TESPA1/GABPA/IL4R/N…	BP
actin filament bundle assembly	94/7182	136/17910	6.28417e-12	2.19437e-10	1.64067e-10	94	S1PR1/ELN/DLC1/LPAR1/TGFB3/ARHGEF15/NRP1/DPYSL3/PPM1F/SHANK3/CCN2/ADD1/SH3PXD2B/EVL/SFRP1/PHLDB2/PRKN/PIK3R1/ABL1/FAM107A/WASF2/ACTN1/SORBS1/NOX4/FLNA/ZYX/ASAP3/SORBS3/ITGB5/RDX/ARHGAP6/GPR65/MARCKS/TACR1/PHACTR1/AIF1/TGFBR1/TPM1/SRF/SWAP70/CORO2B/CLASP1/INPP5K/EZR/ARAP1/ARRB1/ROCK1/BBS4/ID1/ARHGEF10/LIMCH1/TAC1/SPIRE1/RGCC/ARHGEF5/NEDD9/CLASP2/SPIRE2/RAPGEF3/MYOC/USH1C/ITGB1BP1/CARMIL1/HSP90B1/P…	BP
exocytosis	442/7182	862/17910	6.97666e-12	2.42833e-10	1.81559e-10	442	A2M/TIMP2/PECAM1/VEGFC/SELP/HTR2A/SERPING1/ISLR/RAB31/CRISPLD2/SYT11/ARSB/PLEKHO2/TGFB3/BACE1/TIMP3/HGF/STOM/CD93/F8/FOXF1/CYB5R3/VWF/STING1/ATP8B4/MYH10/SPARC/PTPRB/GNAI2/GSN/TLN1/MMRN1/LHFPL2/VEGFB/TGFB1/RARRES2/AP1M1/VPS35L/PIP5K1C/PRKN/PRCP/GAS6/YPEL5/THBS1/LRRK2/PRKCB/ITIH3/VAMP2/P2RX7/FCGR2B/GRIK5/IGF1/ACTN1/CACNB2/ITGB3/FLNA/C3/ITSN1/LAIR1/FGL2/DEGS1/VCL/ITGAV/MYO5A/MILR1/MAGED2/KCNB1/MYH9…	BP
positive regulation of cell development	288/7182	528/17910	7.38588e-12	2.5625e-10	1.9159e-10	288	ZEB2/TCF4/TIMP2/IL6ST/SLIT2/VEGFC/HEYL/DLG4/BEND6/PRKD1/SERPINF1/FZD4/ARSB/LPAR1/APBB1/CDH5/HGF/MEF2C/GLI3/ZEB1/ISLR2/GLI2/CAMK1D/FEZ1/NRP1/TENM4/DPYSL3/PDE5A/FZD1/EPHA3/BCL2/MAGI2/IL34/ROBO1/MAP1B/CXCL12/SHANK3/BMPR2/MYADM/NEGR1/ADD1/SMARCD3/LRP1/PRKCH/NUMBL/ASPA/FYN/SMO/GDF6/SCN1B/CDON/TGFB1/NAP1L2/PRKN/ABL1/FGFR1/CSF1/MACF1/ILK/CRTC1/PTN/NGF/IGF1/P2RY12/PREX1/FLNA/ITSN1/CREB3L2/NTN1/NCOA1/SCAR…	BP
immune effector process	592/7182	1197/17910	7.50434e-12	2.59525e-10	1.94039e-10	592	A2M/C1S/C1R/TIMP2/PECAM1/SERPING1/IL1R1/RAB31/CRISPLD2/ARSB/KCNJ8/PLEKHO2/TGFB3/ABCC9/STOM/C1RL/STAT5B/RORA/CD93/C4A/ADARB1/ANGPT1/NOTCH2/FOXF1/CYB5R3/BCL2/C7/STING1/ATP8B4/TRIL/PTPRB/GSN/GPR183/DOCK11/LRP1/FYN/CD81/HLX/WIPF1/TGFB1/DYSF/C4B/AP1M1/VPS35L/LOXL3/SOCS5/PIK3R1/ABL1/PRCP/CFH/YPEL5/ITM2A/RNASE6/HTRA1/VAMP2/P2RX7/FCGR2B/ELMO1/WASF2/TLR7/LGALS1/FLNA/C3/LAIR1/RFTN1/SPON2/FGL2/IL33/DEGS1/VC…	BP
regulated exocytosis	399/7182	768/17910	7.79499e-12	2.68716e-10	2.00911e-10	399	A2M/TIMP2/PECAM1/VEGFC/SELP/HTR2A/SERPING1/ISLR/RAB31/CRISPLD2/SYT11/ARSB/PLEKHO2/TGFB3/BACE1/TIMP3/HGF/STOM/CD93/F8/FOXF1/CYB5R3/VWF/STING1/ATP8B4/SPARC/PTPRB/GNAI2/GSN/TLN1/MMRN1/LHFPL2/VEGFB/TGFB1/RARRES2/AP1M1/VPS35L/PIP5K1C/PRCP/GAS6/YPEL5/THBS1/LRRK2/PRKCB/ITIH3/VAMP2/P2RX7/FCGR2B/GRIK5/IGF1/ACTN1/CACNB2/ITGB3/FLNA/C3/LAIR1/FGL2/DEGS1/VCL/ITGAV/MILR1/MAGED2/KCNB1/MYH9/PROS1/ANO6/NCS1/NFASC/…	BP
positive regulation of MAP kinase activity	153/7182	250/17910	1.01717e-11	3.49532e-10	2.61335e-10	153	ZEB2/MAPK10/MAP3K3/PDGFRB/HTR2A/MAP3K12/C1QTNF2/MDFIC/FZD4/LPAR1/TGFB3/HGF/PEA15/PDE5A/ROR2/ROBO1/NRK/NOD1/GHR/CD81/F2R/FGF2/TGFB1/FGF1/THBS1/ITGA1/LRRK2/P2RX7/FGFR1/ILK/SASH1/NGF/IGF1/FZD8/FGF10/NOX4/CSPG4/RAPGEF1/SHC2/MAPK11/PIK3R5/PIK3R6/KIT/CDK1/CCL19/GADD45B/TGFBR1/MAP3K20/FLT1/TLR4/MAP3K14/HTR2B/FGD2/KIDINS220/PKN1/SHC1/TIAM1/CXCR4/AKAP13/MST1R/PAK3/TAB2/PDGFB/MAP3K21/ADORA1/MAP2K5/ARRB1/EZ…	BP
positive regulation of cell proliferation	472/7182	931/17910	1.21706e-11	4.1689e-10	3.11696e-10	472	TEK/S1PR1/MAP3K3/IL6ST/PDGFRB/AKT3/GLI1/TNFSF12/VEGFC/HTR2A/PRKD1/ZFPM2/DDR2/IGFBP5/S1PR3/TGFB3/GREM1/AR/MEF2C/GLI3/PRRX1/WWTR1/GLP2R/GLI2/PTGFR/FGF7/STAT5B/ACVRL1/NRP1/CYP7B1/TMEM119/CLEC11A/NOTCH2/FOXF1/LTBP3/BCL2/IL34/PBX1/THBS4/CSF1R/APLNR/CXCL12/BMPR2/TGFBR2/PDGFRA/CCN2/GNAI2/FLT4/MEF2D/GPR183/NOTCH3/SMARCD3/PRKCH/CD81/F2R/SMO/HLX/ADAMTS1/FGF2/LBH/CALCRL/CDON/TGFB1/FGF1/DYSF/EDNRB/SFRP1/ABL1…	BP
regulation of cytokine production	366/7182	698/17910	1.26407e-11	4.31623e-10	3.22712e-10	366	LRRC32/IL6ST/HEG1/CD34/LTBP1/LUM/CYP1B1/IL1R1/CD200/SYT11/S1PR3/TGFB3/NFATC4/SSC5D/HGF/LURAP1/STAT5B/RORA/NAV3/ANGPT1/STING1/CSF1R/TRIL/NOD1/FLT4/LRP1/C1QTNF4/CD81/F2R/TGFB1/TWSG1/SOCS5/PIK3R1/ABL1/GAS6/THBS1/LRRK2/P2RX7/FGFR1/FCGR2B/NLRP1/ZNF287/APOD/ISL1/IGF1/ARNT/HDAC7/TLR7/ZBTB20/ABCD2/C3/AKAP12/SPON2/IL33/ITGAV/LY96/SULF1/CREBBP/CCM2L/GPNMB/IL17D/AXL/CARD8/PER1/MAPK11/PDE4B/ADCYAP1/TRIM6/HYA…	BP
organophosphate metabolic process	543/7182	1090/17910	1.35373e-11	4.60781e-10	3.44513e-10	543	PDE1A/TEK/GUCY1B1/GUCY1A1/PDGFRB/HTR2A/NPR2/PRKD1/PTGIS/RHOQ/FAM20C/RORA/PDE2A/PDE5A/ADCY4/TTC7B/PDE7B/SERINC1/CSF1R/PIP4K2A/PDGFRA/ADCY9/GIMAP7/NPR1/SMPD1/CD81/ADGRF5/ADCY5/FGF2/TGFB1/PIK3IP1/GUCY1A2/ISCU/SOCS5/PIP5K1C/PIK3R1/PTH1R/AASS/INPP4A/LRRK2/PINK1/PIP4P2/P2RX7/DLG2/PRXL2C/NUDT10/PLA2G4C/IGF1/TPST1/P2RY12/ARNT/ZBTB20/TNFAIP8L3/FMO1/PID1/H6PD/PDE8B/MECP2/ITPKB/ACACB/OSBPL5/INPP5B/COX5A/NUD…	BP
stress-activated MAPK cascade	163/7182	271/17910	1.60107e-11	5.43255e-10	4.06176e-10	163	ZEB2/MAPK10/MAP3K3/MAP3K12/MDFIC/DACT1/FZD4/SH2D3C/ARHGEF6/HGF/SH3RF3/ROR2/NRK/NOD1/CCN2/PJA2/FLT4/GDF6/SFRP1/PRKN/SFRP2/CRYAB/PINK1/HIPK3/FCGR2B/DUSP3/SASH1/RASSF2/SEMA4C/FZD8/RAPGEF1/PER1/DUSP1/MAPK11/FZD7/HAND2/ZFP36L1/CYLD/PAFAH1B1/PBK/CCL19/GADD45B/MAP3K20/ARL6IP5/TLR4/EDA2R/FOXO1/FGD2/PKN1/AIDA/TIAM1/ZMYND11/EZR/TAB2/MAP3K21/SIRPA/MAPK13/TRAF4/CCR7/MAP3K6/ZFP36/EPHA4/MAP2K7/TAOK1/ARHGEF5/DU…	BP
positive regulation of neuron projection development	160/7182	265/17910	1.60637e-11	5.43347e-10	4.06245e-10	160	ZEB2/SLIT2/DLG4/PRKD1/SERPINF1/FZD4/ARSB/LPAR1/APBB1/HGF/ISLR2/CAMK1D/FEZ1/NRP1/DPYSL3/FZD1/EPHA3/MAGI2/ROBO1/MAP1B/CXCL12/SHANK3/BMPR2/NEGR1/LRP1/FYN/SCN1B/PRKN/FGFR1/MACF1/ILK/CRTC1/PTN/NGF/ITSN1/CREB3L2/NTN1/SCARF1/P3H1/PPP2R5B/RAPGEF1/NME1/MEGF8/MOB2/NGFR/ADCYAP1/RAP1A/RGS2/AMIGO1/FBXO31/FES/FN1/PAFAH1B1/NIN/SRF/ABL2/RUFY3/STMN2/NPTN/KIDINS220/CFLAR/TIAM1/CXCR4/MAPT/CNR1/PAK3/C21orf91/BHLHB9/…	BP
developmental growth	331/7182	624/17910	2.04304e-11	6.88888e-10	5.15061e-10	331	ZEB2/S1PR1/NDN/TNS2/EVC/HEG1/PDGFRB/SLIT2/GLI1/CPQ/BNC2/ZFPM2/DDR2/THBS3/SPART/AR/SLIT3/MEF2C/GLI3/WWTR1/ISLR2/GLI2/FGF7/STAT5B/CLIC4/LEPR/NRP1/WWC3/TENM4/ADARB1/BCL2/MAGI2/FOXS1/NLGN3/MAP1B/CXCL12/BMPR2/NRK/TGFBR2/MEIS1/ADD1/PRMT2/LAMB2/GSN/FTO/GHR/LRP1/SH3PXD2B/SELENOM/CD81/SMO/HLX/SEMA3G/FGF2/TGFB1/FGF1/DYSF/SPRY1/SFRP1/PRKN/ABL1/PLXNA4/SFRP2/DPYSL2/NRP2/GAS1/COLQ/SGCA/TGFBR3/FGFR1/CSF1/MACF1/…	BP
regulation of catabolic process	464/7182	916/17910	2.15742e-11	7.25189e-10	5.42202e-10	464	DCN/TNFSF12/ITPR1/HTR2A/PRICKLE1/PRKD1/DACT1/DAB2/MAP1A/LZTS1/TIMP3/ECSCR/HGF/FEZ1/LEPR/RASIP1/VIM/MSN/BCL2/STING1/SOX17/PIP4K2A/MID2/NOD1/FTO/LRP1/FYN/CD81/PKD1/RARRES2/DYSF/SOCS5/SNX1/PRKN/ABL1/FYCO1/GNA12/SUFU/CRTC3/LRRK2/RAB12/PINK1/ATP6V1G2/P2RX7/AZIN2/RRAGB/HERC1/PRXL2C/FBXL5/CIRBP/KDR/IGF1/EPM2A/ARNT/ZBTB20/ATP2B4/DEPP1/ABCD2/FLNA/DAPK3/IL33/FAP/MYLIP/ACACB/OAZ2/RDX/SOGA1/ITGB1/HSPB8/UVRAG…	BP
stress-activated protein kinase signaling cascade	166/7182	278/17910	2.38783e-11	8.00146e-10	5.98246e-10	166	ZEB2/MAPK10/MAP3K3/MAP3K12/MDFIC/DACT1/FZD4/SH2D3C/ARHGEF6/HGF/SH3RF3/ROR2/NRK/NOD1/CCN2/PJA2/FLT4/GDF6/SFRP1/PRKN/SFRP2/CRYAB/PINK1/HIPK3/FCGR2B/DUSP3/SASH1/RASSF2/SEMA4C/FZD8/RAPGEF1/PER1/DUSP1/MAPK11/FZD7/HAND2/ZFP36L1/CYLD/PAFAH1B1/PBK/CCL19/GADD45B/MAP3K20/ARL6IP5/TLR4/EDA2R/FOXO1/FGD2/PKN1/AKR1B1/AIDA/TIAM1/ZMYND11/EZR/TAB2/MAP3K21/SIRPA/MAPK13/TRAF4/CCR7/MAP3K6/ZFP36/EPHA4/MAP2K7/TAOK1/ARH…	BP
lymphocyte differentiation	189/7182	325/17910	2.67249e-11	8.9276e-10	6.6749e-10	189	GLI3/ZEB1/GLI2/STAT5B/RORA/LEPR/MAFB/NOTCH2/BCL2/TGFBR2/GPR183/DOCK11/HLX/TGFB1/SFRP1/LOXL3/SOCS5/PIK3R1/ABL1/GAS6/ITM2A/HDAC5/FCGR2B/ZMIZ1/CD1D/FZD8/LGALS1/PREX1/ZBTB16/ITPKB/DOCK10/SATB1/AXL/ITGB1/PIK3R6/FZD7/ZFP36L1/FOXP1/CYLD/KIT/CD4/VCAM1/TMEM131L/CD28/MERTK/CCL19/NLRP3/SRF/PPP3CB/BCL6/ITGA4/ATM/PIK3CD/DTX1/PLCL2/TESPA1/IL4R/NCKAP1L/MMP14/NFATC2/LYL1/IL7R/SOS1/CR1/VSIR/IKZF1/MFNG/CCR2/RNF41/…	BP
regulation of cell-substrate adhesion	127/7182	201/17910	2.69188e-11	8.96464e-10	6.7026e-10	127	TEK/COL8A1/CCDC80/DLC1/FBLN1/FZD4/GREM1/NID1/ABI3BP/ACVRL1/THY1/NRP1/PPM1F/EPHA3/FOXF1/BCL2/MYADM/PEAK1/LRP1/SMOC2/SFRP1/PHLDB2/PIK3R1/ABL1/THBS1/FAM107A/UTRN/CSF1/MACF1/ILK/DUSP3/APOD/PTN/KDR/COL16A1/LGALS1/PREX1/FLNA/RSU1/DAPK3/CCN1/ARHGAP6/FZD7/GPM6B/LDB1/DUSP22/EDIL3/FN1/SPOCK1/BST1/PDPN/EGFLAM/BCL6/COL1A1/PTEN/CORO1C/CDH13/DOCK1/MMP14/TRIOBP/CORO2B/ITGA5/CD36/CLASP1/CASS4/PLEKHA2/ROCK1/PRKCE…	BP
cellular catabolic process	962/7182	2054/17910	2.81629e-11	9.35008e-10	6.99078e-10	962	PDE1A/FBXL7/GGT5/DCN/ENTPD1/ITPR1/HTR2A/CPQ/LUM/PRICKLE1/CYP1B1/PRKD1/OMD/DACT1/ARSB/DAB2/KCTD10/MAP1A/LZTS1/PRELP/TIMP3/ECSCR/HGF/WWTR1/FEZ1/GPRASP1/OGN/LEPR/RNF217/SPSB1/PDE2A/RASIP1/PDE5A/VIM/MSN/SRPX/CTSK/BGN/PDE7B/BCL2/STING1/VCAN/PIP4K2A/CDO1/MID2/NOD1/USP51/FTO/LRP1/ASPA/TGFB1I1/SMPD1/CD81/PKD1/FGF2/TGFB1/TECPR2/SOCS5/PRKN/ABL1/KLHL20/RNF146/RNF122/ZFYVE1/FYCO1/AASS/GNA12/GABARAPL1/COLQ/SU…	BP
actomyosin structure organization	107/7182	163/17910	3.37337e-11	1.11652e-09	8.34791e-10	107	S1PR1/ELN/PDGFRB/DLC1/LPAR1/TGFB3/ARHGEF15/MEF2C/LURAP1/NRP1/PPM1F/CNN3/MYH10/PDGFRA/CCN2/SH3PXD2B/MEF2A/EVL/SFRP1/PHLDB2/PIK3R1/ABL1/WASF2/SORBS1/NOX4/ZYX/ASAP3/MYH9/SORBS3/ITGB5/ITGB1/ARHGAP6/GPR65/TACR1/PHACTR1/CFL2/TGFBR1/MYH11/TPM1/SRF/LDB3/PRKAR1A/KRT8/CNN1/CFLAR/CORO2B/CASQ2/AKAP13/CLASP1/INPP5K/ARAP1/FHOD3/CASQ1/KRT19/ARRB1/F11R/ROCK1/BBS4/EPB41L4B/ARHGEF10/ACTC1/LIMCH1/TAC1/CDC42BPA/RGCC…	BP
protein localization to plasma membrane	145/7182	237/17910	3.62657e-11	1.19666e-09	8.94705e-10	145	RAMP3/DCHS1/RAMP2/RAB31/DAB2/EHD2/RHOQ/AR/PALM/CLIP3/ANK2/RILPL1/TTC7B/EPHA3/MYADM/LRP1/PRKCH/CD81/TGFB1/PIK3R1/GAS6/TMEM88/VAMP2/MACF1/CACNB2/SORBS1/EPB41L3/PID1/FLNA/MYO5A/KCNB1/NFASC/PACS1/RDX/ITGB1/SEC23A/RAP1A/FAM126A/ARL6/PKP3/CNPY4/RILPL2/RAB34/ARHGEF16/CNST/KRT18/MMP14/PICALM/INPP5K/EZR/KCNIP3/TREM2/VTI1B/DPP6/EHD3/SLMAP/F11R/ROCK1/ATP1B1/PRKCE/CRB3/PTCH1/TNFRSF1A/CDH1/VAMP8/RAPGEF2/MAP7/…	BP
response to transforming growth factor beta	146/7182	239/17910	3.65102e-11	1.20105e-09	8.97992e-10	146	NR3C1/LRRC32/EMILIN1/LDLRAD4/LTBP1/FBN1/ENG/LTBP2/DAB2/TGFB3/CDH5/MEF2C/ZEB1/ACVRL1/DKK3/PDE2A/ASPN/COL4A2/SKI/FERMT2/TGFBR2/LTBP4/TGFB1I1/FYN/TGFB1/TWSG1/SFRP1/CILP/PDE3A/THBS1/NRROS/HTRA1/TGFBR3/HTRA3/COL1A2/COL3A1/NOX4/ZYX/CITED2/CREBBP/CLDN5/ITGB5/MYOCD/PDGFD/ZFHX3/SMAD9/ZFP36L1/CLEC3B/HYAL2/SOX5/TGFBR1/VASN/LOX/GDF10/COL1A1/GOT1/CFLAR/OVOL2/GLG1/CX3CR1/FLCN/SMAD5/CREB1/PPM1A/FNDC4/ZFYVE9/F11…	BP
connective tissue development	148/7182	243/17910	3.69098e-11	1.21051e-09	9.05061e-10	148	MGP/EVC/CD34/PDGFRB/LUM/THBS3/SPART/MAF/GREM1/EFEMP1/MEF2C/GLI3/ZEB1/PRRX1/GLI2/ACVRL1/FRZB/KLF7/ROR2/CTSK/BMPR2/TGFBR2/CCN2/MEF2D/FTO/SLC39A13/SH3PXD2B/SELENOM/GDF6/PKD1/ACTA2/FGF2/TGFB1/COL5A1/SFRP2/PTH1R/WNT2B/FGFR1/CSF1/EBF2/CHRDL2/CREB3L2/SULF1/ZBTB16/CCN1/NFIB/RARB/TRPS1/ARID5B/PDGFD/HAND2/WNT9A/HYAL2/SOX5/POC1A/ARRDC3/TIMP1/PIK3CA/GPR4/BMPR1A/SNAI2/TGFBR1/CCN4/SRF/BMP6/LOX/CYTL1/COL1A1/TGF…	BP
regulation of Rho protein signal transduction	86/7182	124/17910	3.70736e-11	1.21219e-09	9.06322e-10	86	HEG1/PREX2/PDGFRB/DLC1/ARHGEF17/LPAR1/RASGRF2/ARHGEF15/ARHGEF6/NRP1/KANK2/RASIP1/ARHGEF25/ROBO1/FGD5/F2R/ABL1/ABCA1/ARHGEF40/FGD1/COL3A1/PREX1/ARHGEF9/ITSN1/PLEKHG1/MYO9B/ITGB1/PLEKHG2/ARHGEF26/BCL6/ABL2/FGD2/TRIO/ARHGEF16/FLCN/TIAM1/SOS1/AKAP13/FGD3/ARRB1/ARHGEF2/SOS2/EPS8L1/ARHGEF10/ARHGEF39/RIPOR2/ARHGEF5/EPS8L2/F2RL1/ARHGEF3/MYOC/ECT2/KANK1/ARHGAP35/ARHGEF7/FLOT1/ARHGDIB/ARHGEF38/NGEF/ITSN2/K…	BP
transcription by RNA polymerase II	1186/7182	2581/17910	4.06013e-11	1.31845e-09	9.85767e-10	1186	ERG/ZEB2/FSTL1/MAPK10/S1PR1/TCF4/NDN/ZNF521/HIC1/NR3C1/ZBTB47/JAZF1/NR2F1/DCN/BHLHE22/PKD2/GLI1/FBN1/TCF21/SETBP1/HEYL/ENG/POU6F1/LUM/PKNOX2/BNC2/ZNF135/PRKD1/ZFPM2/MEOX2/ZNF423/DACT1/FOXN3/ZBTB4/ZNF25/APBB1/TGFB3/AEBP1/NFATC4/MAF/GREM1/RHOQ/ZNF362/EID1/ZNF333/AR/GLIS2/HGF/MEF2C/GLI3/ZEB1/PRRX1/ZNF582/WWTR1/GLI2/CREBL2/FLI1/ZNF366/STAT5B/RORA/ACVRL1/ZNF354C/WWC3/NFIA/ZNF781/ELK3/PDE2A/MAFB/KANK2/…	BP
cellular response to external stimulus	186/7182	320/17910	4.06761e-11	1.31845e-09	9.85767e-10	186	ENG/PRKD1/PDE2A/KANK2/SESN3/BCL2/BMPR2/FYN/TGFB1/RIPOR1/SFRP1/SFRP2/ZFYVE1/GAS6/WNT2B/FOLR2/FAM107A/LRRK2/P2RX7/RRAGB/PTN/SSH1/P2RY12/TLR7/KLF10/NCOA1/KCNB1/AVPR1A/AXL/MYOCD/MAP1LC3C/AMIGO1/AQP1/FES/TNRC6A/VCAM1/SIPA1/TLR5/AIF1/SNAI2/ATP1A2/SRF/BMP6/TNC/TLR4/AIFM1/ITGA4/BMT2/MAP3K14/COL1A1/RRAGA/FOXO1/RNF152/SH3GLB1/GOT1/GJA1/MAP1LC3B/IFI16/TNFSF14/ATG14/TNFRSF1A/ULK1/HABP4/PDK4/PRKAA2/MIR125B1/S…	BP
regulation of growth	350/7182	668/17910	4.06899e-11	1.31845e-09	9.85767e-10	350	FBLN5/IGFBP7/NDN/SLIT2/GLI1/ZFPM2/IGFBP5/APBB1/SPART/GREM1/AR/SLIT3/MEF2C/IGFBP4/ISLR2/STAT5B/ACVRL1/FRZB/NRP1/WWC3/RERG/PPM1F/NOTCH2/BCL2/FOXS1/MAP1B/SOX17/CXCL12/BMPR2/NRK/TGFBR2/MEIS1/LTBP4/FTO/GHR/LRP1/CLSTN3/SH3PXD2B/NPR1/SMO/HLX/SEMA3G/FGF2/TGFB1/SFRP1/SOCS5/PRKN/ABL1/PLXNA4/DACT3/SFRP2/DPYSL2/GAS6/MEG3/COLQ/CRYAB/FAM107A/NSMCE3/TGFBR3/FGFR1/PTCH2/CSF1/MACF1/ILK/FHL1/ULK2/IGF1/LRP12/EPB41L3…	BP
establishment of cell polarity	87/7182	126/17910	4.15114e-11	1.34104e-09	1.00266e-09	87	JAM3/CDH5/CYTH3/FEZ1/MSN/FOXF1/MAP1B/GSN/FRMD4A/PKD1/SPRY1/MYO9A/MAP4/FGF10/MYH9/PAFAH1B1/CCL19/RUFY3/MAD2L1/BRSK1/SAPCD2/CENPA/CLASP1/MAP2/TCF15/DOCK8/MARK1/RNF41/DCTN1/ROCK1/PLK1/ARHGEF2/CCR7/NUMA1/RIPOR2/UST/DOCK2/GATA3/FAM89B/CYTH1/KIF20B/RAP1B/NDC80/WWC1/KANK1/SLC9A3R1/SNX27/HSP90AA1/FERMT1/HES1/SYNE4/FLOT2/EPHB1/PRKCZ/SCRIB/MPP7/NDE1/CCL21/MARK4/MISP/SPDL1/FOXJ1/SHTN1/CAMSAP3/FRMD4B/SH3BP1/…	BP
protein-containing complex disassembly	175/7182	298/17910	4.81532e-11	1.55096e-09	1.15961e-09	175	NAV3/FZD1/TTBK2/HDGFL3/NCKAP5L/MAP1B/ADD1/GSN/SMARCD3/BMERB1/TMOD2/TMOD1/FYCO1/GABARAPL1/LMOD1/RDX/UVRAG/MAP1LC3C/PLEKHH2/ADRB2/MICAL2/CFL2/DSTN/STMN2/SWAP70/SYNJ1/NES/MRPL12/MAP1LC3B/KLC1/TRIOBP/CLASP1/TBC1D25/APC/GABARAPL2/MTIF2/MICAL3/DYRK3/ATG14/ARHGEF2/WASHC2C/MRPL23/FZD2/HMGA1/CAV1/KIF2C/MCOLN1/MRPL52/VAMP8/APEH/MRPL48/SNAPIN/RUBCN/MRPS5/MRPL27/MAP1LC3A/MRPL3/TAOK1/SEMA5A/EIF5A/KIF18B/KIF18…	BP
negative regulation of developmental process	507/7182	1017/17910	5.88853e-11	1.89099e-09	1.41384e-09	507	TEK/MAP3K3/MMRN2/CNTN4/NR2F1/DCN/PTPRM/EMILIN1/PMP22/LDLRAD4/AKT3/SLIT2/FBN1/NPR2/PRICKLE1/TIE1/RUNX1T1/DENND5A/ZFPM2/MEOX2/TBXA2R/FBLN1/SERPINF1/IGFBP5/PLPP7/S1PR3/LPAR1/ARHGEF15/SPART/NFATC4/GREM1/EFEMP1/STAB1/ECSCR/GLI3/ZEB1/WWTR1/GLI2/STAT5B/DAAM2/RORA/ACVRL1/THY1/FRZB/NRP1/WWC3/DPYSL3/TMEM119/MAFB/KLF7/ASPN/VIM/COL4A2/CTSK/BCL2/VASH1/PBX1/NLGN3/ROBO1/THBS4/HSPG2/SKI/SOX17/TWIST2/BMPR2/SPARC/…	BP
protein-containing complex assembly	825/7182	1742/17910	6.14868e-11	1.96867e-09	1.47192e-09	825	FBXL7/NAP1L3/SEPTIN4/TEK/TCF4/ELN/EMILIN1/PKD2/LDLRAD4/KIRREL1/SLIT2/SELP/DLG4/C1QTNF2/DACT1/SYT11/KCTD12/KCTD10/COL6A2/KCND1/COLEC12/GREM1/MAP7D3/AR/STOM/TSPAN4/ANXA6/CELF2/LRRC8C/CLIP3/DPYSL3/F8/NAV3/RASIP1/ANGPT1/MSN/MAGI2/HDGFL3/VWF/STING1/SKI/FERMT2/MAP1B/CXCL12/TRABD2B/MYADM/NOD1/ADD1/GJA5/GSN/TLN1/TLE4/NAP1L5/FCHSD2/SH3PXD2B/JMY/GLRB/ALDH1A3/PKD1/WIPF1/PYGO1/KCTD7/TGFB1/ATL1/EVL/NAP1L2/ANK…	BP
regulation of mitotic cell cycle	328/7182	622/17910	6.33412e-11	2.02205e-09	1.51183e-09	328	FBXL7/TTC28/TIMP2/PKD2/PDGFRB/DACT1/FOXN3/STAT5B/KANK2/BCL2/MAGI2/PBX1/TUBA1A/PRMT2/SMARCD3/UBE2E2/PKD1/ADAMTS1/SMOC2/TGFB1/CTDSP2/ANKRD53/ABL1/GAS1/FAM107A/FGFR1/CCL2/SEPTIN7/DUSP3/FHL1/IGF1/CCDC8/FGF10/MAP9/DAPK3/FAP/GNAI1/HSPA2/MECP2/GPNMB/ZWINT/RDX/PRKAR2B/DUSP1/NACC2/PRKACA/ZFP36L1/WNT9A/TAL1/FBXO31/CYLD/PAFAH1B1/CDK1/CD28/HECA/AIF1/MAP3K20/TFDP2/SETMAR/BCL6/HMMR/PTEN/CCNB1/ATM/HECW2/MAD2L1/…	BP
regulation of cell shape	85/7182	123/17910	6.47394e-11	2.06059e-09	1.54064e-09	85	DLC1/LPAR1/PALM/FMNL3/PARVA/MSN/FERMT2/CSF1R/MYH10/FGD5/FYN/PLEKHO1/ITGA7/GNA12/PALMD/ARHGAP15/FGD1/CCL2/SEPTIN7/ATP10A/PTN/KDR/EPB41L3/DAPK3/MYH9/RDX/BVES/SYNE3/FES/KIT/FN1/PDPN/TPM1/FGD2/FMNL1/EZR/S100B/ARAP1/FGD3/PARVB/LST1/FGR/WASF3/CDC42EP1/RASA1/HCK/FBLIM1/ALDOA/CFAP410/CCL11/ITGB2/SLC9A3R1/ARHGAP35/RHOU/TAOK2/MYH14/FGD6/GNA13/STRIP2/CDC42EP5/SHROOM3/CDC42SE1/BAMBI/CCL13/MKLN1/BRWD1/DIAPH1/…	BP
cell-substrate junction assembly	70/7182	96/17910	6.54348e-11	2.07659e-09	1.55261e-09	70	TEK/DLC1/GREM1/ACVRL1/THY1/NRP1/PPM1F/EPHA3/BCL2/FERMT2/TNS1/PEAK1/TLN1/LRP1/SFRP1/PHLDB2/ABL1/THBS1/FAM107A/MACF1/DUSP3/APOD/KDR/COL16A1/ACTN1/SORBS1/DAPK3/LAMC1/ARHGAP6/GPM6B/LDB1/DUSP22/FN1/PTEN/CORO1C/MMP14/CORO2B/ITGA5/CLASP1/ROCK1/LIMCH1/LIMS1/CLASP2/ACTN2/MYOC/ARHGEF7/MAP4K4/CD151/ITGB4/ITGB1BP1/TAOK2/LAMB3/LAMA5/ITGA6/PDPK1/WHAMM/SLC9A1/CAMSAP3/IQGAP1/EFNA5/RHOA/S100A10/RAC1/LAMC2/TSC1/RO…	BP
positive regulation of neurogenesis	250/7182	455/17910	6.83483e-11	2.16269e-09	1.61698e-09	250	ZEB2/TCF4/TIMP2/IL6ST/SLIT2/VEGFC/HEYL/DLG4/BEND6/PRKD1/SERPINF1/FZD4/ARSB/LPAR1/APBB1/HGF/MEF2C/GLI3/ZEB1/ISLR2/GLI2/CAMK1D/FEZ1/NRP1/TENM4/DPYSL3/FZD1/EPHA3/BCL2/MAGI2/IL34/ROBO1/MAP1B/CXCL12/SHANK3/BMPR2/NEGR1/SMARCD3/LRP1/PRKCH/NUMBL/ASPA/FYN/SMO/GDF6/SCN1B/CDON/TGFB1/NAP1L2/PRKN/FGFR1/CSF1/MACF1/ILK/CRTC1/PTN/NGF/P2RY12/FLNA/ITSN1/CREB3L2/NTN1/NCOA1/SCARF1/P3H1/PPP2R5B/RAPGEF1/NME1/MEGF8/RAR…	BP
nitrogen compound transport	951/7182	2035/17910	6.86607e-11	2.16623e-09	1.61962e-09	951	QKI/MAPK10/LRRC32/CD34/RAMP3/RFTN2/ITPR1/VEGFC/HTR2A/COPZ2/RAMP2/PRICKLE1/MDFIC/CAVIN1/LTBP2/RAB31/CD200/NLGN2/SYT11/DAB2/APBB1/TGFB3/MAP1A/SSC5D/GLI3/STOM/LRRC8C/CLIP3/SYNDIG1/LEPROT/KLF7/ANGPT1/PPM1F/RAB3IL1/ANK2/RILPL1/PKIG/CSF1R/MYH10/CXCL12/TGFBR2/NEURL1B/GJA5/LTBP4/FRMD4A/LRP1/C1QTNF4/NISCH/NACAD/FCHSD2/FYN/CD81/F2R/SMO/DENND2A/ARL2BP/ADCY5/PKD1/TXNIP/CALCRL/TGFB1/DYSF/RIPOR1/AP1M1/RAB8B/SF…	BP
cellular response to organic cyclic compound	286/7182	532/17910	7.38888e-11	2.32437e-09	1.73787e-09	286	PLPP1/NR3C1/NR2F1/RAMP3/PKD2/TCF21/HEYL/CYP1B1/SERPINF1/IGFBP5/DAB2/COLEC12/NFATC4/AR/MEF2C/GLI2/ZNF366/RORA/RBFOX2/CYP7B1/PDE2A/KANK2/CREBRF/MSN/CALCOCO1/KLF9/FOXF1/STING1/PRMT2/TGFB1I1/LMO3/SMO/ADCY5/LBH/TGFB1/NR2F2/SFRP1/PRKN/ABL1/PDE3A/FOLR2/PGR/FAM107A/LRRK2/ABCA1/CRY2/P2RX7/CCL2/PTN/SSH1/ISL1/P2RY12/SLC8A1/ATP2B4/LGALS1/FBXO32/NOX4/NCOA1/GNAI1/KCNMB1/RAPGEF1/PER1/RARB/PDE4B/ADCYAP1/RAP1A/PR…	BP
leukocyte migration	255/7182	467/17910	1.02679e-10	3.22067e-09	2.408e-09	255	GYPC/TEK/S1PR1/JAM3/CD34/PECAM1/JAM2/EMILIN1/SLIT2/VEGFC/SELP/IL1R1/SDC2/CD200/GREM1/CAMK1D/STAT5B/THY1/CYP7B1/ATP1B2/ANGPT1/MSN/ROR2/CH25H/THBS4/CXCL12/GPR183/FYN/CD81/ITGA9/CD99L2/TGFB1/RARRES2/DYSF/EDNRB/ESAM/PIP5K1C/PIK3R1/GAS6/THBD/PLVAP/THBS1/ITGA1/CCL2/CSF1/SDC3/APOD/PTN/COL1A2/P2RY12/ITGB3/PREX1/IL33/ITGAV/EPCAM/FER/MYH9/PROS1/ANO6/STK10/ITGB1/DUSP1/PDE4B/PDGFD/LYST/C3AR1/IL16/KIT/PIK3CA/…	BP
response to oxygen levels	218/7182	389/17910	1.03907e-10	3.24973e-09	2.42973e-09	218	TEK/CD34/PDGFRB/ITPR1/RAMP2/EDNRA/PTGIS/LPAR1/TGFB3/SOD3/CYGB/RORA/ACVRL1/BCL2/CXCL12/TGFBR2/CCN2/EPAS1/WTIP/TGFB1/SFRP1/ETS1/PLAT/THBS1/CRYAB/PINK1/TGFBR3/COX4I2/PTN/ARNT/SLC8A1/PAM/KCNMA1/NOX4/MECP2/CITED2/CREBBP/KCNMB1/MYOCD/TRPC6/ZFP36L1/AQP1/KCNK2/VCAM1/VASN/SRF/AIFM1/COL1A1/PTEN/CCNB1/ATM/FOXO1/PLOD2/CCNA2/CFLAR/SLC2A4/MMP14/CBFA2T3/APOLD1/CXCR4/CREB1/ERO1A/S100B/CDKN1B/KCNK3/ADORA1/KCNA5/A…	BP
epithelial cell proliferation	235/7182	425/17910	1.13567e-10	3.54157e-09	2.64793e-09	235	TEK/COL8A1/CD34/PTPRM/AKT3/GLI1/TNFSF12/COL8A2/PRKD1/SERPINF1/IGFBP5/MCC/AR/HGF/MEF2C/IGFBP4/FGF7/ACVRL1/NRP1/CYP7B1/NOTCH2/KLF9/VASH1/ROBO1/THBS4/APLNR/CXCL12/BMPR2/SPARC/FLT4/SMO/FGF2/TGFB1/NR2F2/FGF1/DYSF/EDNRB/SFRP1/SFRP2/NRP2/PURA/THBS1/PGR/LAMB1/LIMS2/HTRA1/TGFBR3/FGFR1/CCL2/BMPER/TINF2/PTN/KDR/ISL1/IGF1/ARNT/ITGB3/FOXP2/FGF10/ATOH8/FAP/SULF1/LAMC1/NFIB/NME1/KDF1/NGFR/FZD7/RTN4/ZFP36L1/PPP1…	BP
leukocyte proliferation	160/7182	270/17910	1.23909e-10	3.85297e-09	2.88075e-09	160	LRRC32/IL6ST/GREM1/MEF2C/STAT5B/PDE5A/MSN/BCL2/IL34/CSF1R/TGFBR2/GPR183/FYN/CD81/TGFB1/TWSG1/ABL1/PURA/P2RX7/FCGR2B/TNFSF8/CSF1/CD1D/IGF1/FGF10/IL33/SATB1/GPNMB/KIT/CD4/VCAM1/TMEM131L/CD28/TACR1/CCL19/AIF1/PRNP/PPP3CB/TLR4/BCL6/ATM/PRKAR1A/CD209/GJA1/PKN1/PLCL2/NCKAP1L/CLU/NFATC2/IL7R/SOS1/VSIR/DOCK8/CCR2/AZI2/TNFSF4/VSIG4/TNFSF14/HSPD1/TYROBP/LMO1/LILRB1/SPN/TAC1/LST1/TNFSF18/HPRT1/LILRB2/DOCK2/…	BP
regulation of stress-activated MAPK cascade	135/7182	220/17910	1.27206e-10	3.94411e-09	2.94889e-09	135	ZEB2/MAP3K3/MAP3K12/MDFIC/DACT1/FZD4/HGF/SH3RF3/ROR2/NRK/NOD1/CCN2/PJA2/FLT4/GDF6/SFRP1/PRKN/SFRP2/PINK1/HIPK3/FCGR2B/DUSP3/SASH1/RASSF2/SEMA4C/FZD8/RAPGEF1/PER1/DUSP1/FZD7/HAND2/CYLD/PAFAH1B1/PBK/CCL19/GADD45B/MAP3K20/ARL6IP5/TLR4/EDA2R/FOXO1/FGD2/PKN1/AIDA/TIAM1/ZMYND11/EZR/MAP3K21/SIRPA/TRAF4/CCR7/MAP3K6/EPHA4/MAP2K7/TAOK1/ARHGEF5/DUSP19/PRDX1/TRAF6/F2RL1/MAP3K2/SLAMF1/TLR6/MAP4K5/DVL2/ZC3H12A…	BP
mesenchyme development	154/7182	258/17910	1.29602e-10	4.00688e-09	2.99583e-09	154	ZEB2/PHLDB1/PKD2/LDLRAD4/PDGFRB/TCF21/HEYL/DCHS1/ENG/BNC2/EDNRA/ZFPM2/DAB2/TGFB3/FAM172A/GREM1/MEOX1/HGF/MEF2C/WWTR1/ACVRL1/FRZB/NRP1/GLIPR2/EPHA3/FOXF1/BCL2/ROBO1/BMPR2/TGFBR2/TGFB1I1/SMO/ACTA2/TGFB1/EDNRB/SPRY1/SFRP1/PHLDB2/LOXL3/DACT3/SFRP2/NRP2/TGFBR3/FGFR1/RFLNB/ISL1/FGF10/CITED2/TMEM100/HAND2/FBXL17/RTN4/ZFP36L1/OLFM1/FN1/BMPR1A/SNAI2/TGFBR1/VASN/PDPN/NOS3/MCRIP1/COL1A1/HTR2B/PTEN/HEY2/RBM2…	BP
adherens junction assembly	66/7182	90/17910	1.51793e-10	4.67957e-09	3.49878e-09	66	TEK/RAMP2/DLC1/GREM1/ACVRL1/THY1/NRP1/PPM1F/EPHA3/BCL2/FERMT2/PEAK1/LRP1/SFRP1/PHLDB2/PIP5K1C/ABL1/THBS1/FAM107A/MACF1/DUSP3/APOD/KDR/COL16A1/ACTN1/SORBS1/DAPK3/VCL/ARHGAP6/GPM6B/LDB1/DUSP22/PTEN/CORO1C/MMP14/CORO2B/CLASP1/ROCK1/LIMCH1/LIMS1/CLASP2/ACTN2/MYOC/DLG5/SMAD7/ARHGEF7/MAP4K4/ITGB1BP1/TAOK2/LAMA5/PDPK1/HIPK1/WHAMM/SLC9A1/CAMSAP3/IQGAP1/EFNA5/RHOA/S100A10/RAC1/TSC1/ROCK2/SRC/RHOD/RCC2/TBCD	BP
embryo development ending in birth or egg hatching	316/7182	600/17910	1.71902e-10	5.28438e-09	3.95098e-09	316	ZEB2/HEG1/PKD2/RAI2/DCHS1/PRICKLE1/TIE1/EDNRA/ZFPM2/MEOX2/DACT1/DLC1/TGFB3/MEOX1/AR/MEF2C/GLI3/ZEB1/PRRX1/GLI2/RSPO3/ACVRL1/ANGPT1/CC2D2A/ROR2/FZD1/CMTM3/FOXF1/VASH1/PBX1/SKI/SOX17/MYH10/BMPR2/NRK/TGFBR2/PDGFRA/ADD1/EPAS1/SMO/ADGRF5/PKD1/MBNL1/TGFB1/NR2F2/SFRP1/PCDH12/ABL1/SFRP2/SALL2/GNA12/SUFU/FGFR1/ZMIZ1/ISL1/SOX18/IGF1/ARNT/SEMA4C/PRKACB/NCOA1/SULF1/CCN1/ZNF358/MYH9/TMEM100/TCTN1/INPP5B/ITGB1…	BP
epithelial cell development	124/7182	199/17910	1.7378e-10	5.32696e-09	3.98281e-09	124	HEG1/PECAM1/ENG/S1PR3/CDH5/AR/CLIC4/PDE2A/VIM/MSN/RILPL1/MAGI2/MYADM/ADD1/LAMB2/SMO/NOTCH4/ACTA2/TMOD1/PGR/FGFR1/FRMD6/PALLD/SOX18/FLNA/COL18A1/RAB25/RAPGEF1/CLDN5/RDX/KDF1/RARB/RAP1A/PPP1R16B/PAFAH1B1/GPR4/ADAMTSL4/ARHGEF26/BMP6/RILPL2/PTPRS/ABI2/FEM1B/GJA1/TRIOBP/GRHL2/PODXL/VEZF1/CXCR4/HOXA5/EZR/ST14/PDE4D/TBC1D20/PDGFB/ARID4A/F11R/ROCK1/TNFRSF1A/FOXC2/ID1/RAPGEF2/KLF5/SPINT2/SOX9/RIPOR2/SFN/D…	BP
cell cycle phase transition	320/7182	609/17910	1.85684e-10	5.67573e-09	4.24358e-09	320	FBXL7/PKD2/GLI1/DACT1/FOXN3/LZTS1/KANK2/BCL2/PBX1/TUBA1A/PRMT2/SMARCD3/UBE2E2/LATS2/PKD1/ADAMTS1/TGFB1/CTDSP2/KLF11/FAM107A/CCL2/SEPTIN7/FHL1/ATP2B4/FGF10/CKS2/HSPA2/MECP2/GPNMB/RDX/PRKAR2B/PPP1R12B/ITGB1/DUSP1/NACC2/PRKACA/ZFP36L1/FBXO31/PAFAH1B1/CDK1/AIF1/TFDP2/HMMR/PTEN/CCNB1/ATM/HECW2/PPP1R12A/MAD2L1/RBL2/PKIA/NES/SLFN11/XPC/CCNA2/CDC25A/CHMP4C/BRSK1/ORC6/ID4/ACTR1A/CCNB2/PLK4/MELK/CLASP1/PCN…	BP
myeloid leukocyte migration	109/7182	170/17910	1.88322e-10	5.7401e-09	4.2917e-09	109	JAM3/PECAM1/EMILIN1/SLIT2/VEGFC/IL1R1/CD200/GREM1/CAMK1D/STAT5B/ROR2/THBS4/CXCL12/CD81/ITGA9/CD99L2/RARRES2/DYSF/EDNRB/PIP5K1C/THBS1/ITGA1/CCL2/CSF1/P2RY12/PREX1/ANO6/DUSP1/PDE4B/PDGFD/C3AR1/KIT/BST1/JAML/CCL19/AIF1/FLT1/PIK3CD/SWAP70/CX3CR1/NCKAP1L/MMP14/CCN3/TREM2/PDE4D/CCR2/PDGFB/MPP1/SIRPA/CCR7/CMKLR1/C5AR1/RIPOR2/TAFA4/ARHGEF5/CXCL3/CCR1/IL6R/IRAK4/DDT/CXADR/C1QBP/IL17RA/TGFB2/CCL11/ITGB2/PL…	BP
cellular response to nitrogen compound	325/7182	620/17910	1.91545e-10	5.8219e-09	4.35286e-09	325	GUCY1B1/PKD2/SLIT2/FBN1/RAB31/IGFBP5/COLEC12/BACE1/RHOQ/MEF2C/ZEB1/GLP2R/STAT5B/PDE2A/LEPROT/VIM/ADCY4/SESN3/STING1/MAP1B/PDGFRA/NOD1/ADCY9/GNAI2/GHR/LRP1/GAB1/FYN/ADCY5/TGFB1/RARRES2/SFRP1/PRKN/PIK3R1/ABL1/PDE3A/PDGFC/COL6A1/LDOC1/MTR/KLF11/FOLR2/HDAC5/LRRK2/PRKCB/NSMCE3/ATP6V1G2/VAMP2/P2RX7/FCGR2B/RRAGB/MMP2/COL16A1/SSH1/IGF1/COL1A2/COL3A1/P2RY12/SLC8A1/ATP2B4/PRKACB/SORBS1/KLF10/PID1/NOX4/KAT2…	BP
chordate embryonic development	307/7182	581/17910	1.95197e-10	5.91622e-09	4.42338e-09	307	ZEB2/HEG1/PKD2/DCHS1/PRICKLE1/TIE1/EDNRA/ZFPM2/MEOX2/DACT1/DLC1/TGFB3/MEOX1/AR/MEF2C/GLI3/ZEB1/PRRX1/GLI2/RSPO3/ACVRL1/ANGPT1/CC2D2A/ROR2/FZD1/CMTM3/FOXF1/VASH1/PBX1/SKI/SOX17/MYH10/BMPR2/NRK/TGFBR2/PDGFRA/ADD1/EPAS1/SMO/ADGRF5/PKD1/MBNL1/TGFB1/NR2F2/SFRP1/PCDH12/ABL1/SFRP2/SALL2/GNA12/SUFU/FGFR1/ZMIZ1/ISL1/SOX18/IGF1/ARNT/SEMA4C/PRKACB/NCOA1/SULF1/CCN1/ZNF358/MYH9/TMEM100/TCTN1/INPP5B/ITGB1/MEGF…	BP
adherens junction organization	90/7182	134/17910	1.96401e-10	5.93605e-09	4.43821e-09	90	TEK/CDH11/RAMP2/DLC1/CDH5/GREM1/ACVRL1/THY1/NRP1/PPM1F/EPHA3/BCL2/FERMT2/ADD1/PEAK1/LRP1/NUMBL/CADM3/RAB8B/SFRP1/PHLDB2/PIP5K1C/ABL1/THBS1/FAM107A/IQSEC1/MACF1/DUSP3/RASSF8/APOD/KDR/COL16A1/ACTN1/MAPRE2/SORBS1/DAPK3/VCL/RDX/ARHGAP6/GPM6B/LDB1/DUSP22/CDH6/PTEN/CORO1C/CDH13/MMP14/CORO2B/CLASP1/ROCK1/CDH1/LIMCH1/LIMS1/DSP/CLASP2/ACTN2/MYOC/DLG5/NECTIN4/INAVA/SMAD7/ARHGEF7/MAP4K4/ITGB1BP1/TAOK2/LAMA5…	BP
response to oxidative stress	242/7182	442/17910	2.17909e-10	6.5677e-09	4.91048e-09	242	FBLN5/GUCY1B1/PKD2/PDGFRB/CYP1B1/PRKD1/SOD3/CYGB/HGF/SCARA3/FZD1/SESN3/BCL2/PDGFRA/EPAS1/GNAO1/FYN/TXNIP/GPX8/PRKN/ABL1/ETS1/STX2/MTR/CRYAB/LRRK2/PINK1/MMP2/PXDN/RBPMS/MCTP1/APOD/RHOB/ARNT/SLC8A1/ANGPTL7/NOX4/FER/GPX7/AXL/DUSP1/TRPC6/PDGFD/CYCS/HYAL2/AQP1/MAPKAP1/CDK1/TACR1/CCL19/AIF1/PTGS1/PRNP/SELENOP/TPM1/ARL6IP5/NOS3/TPO/TLR4/AIFM1/COL1A1/FOXO1/CCNA2/TXN/ACOX2/CFLAR/NFE2L1/MMP14/SLC23A2/GPX2/…	BP
positive regulation of nervous system development	278/7182	519/17910	2.2578e-10	6.78598e-09	5.07368e-09	278	ZEB2/TCF4/TIMP2/IL6ST/SLIT2/GLI1/VEGFC/HEYL/DLG4/BEND6/FLRT2/PRKD1/NLGN2/SERPINF1/FZD4/ARSB/LPAR1/APBB1/HGF/MEF2C/GLI3/ZEB1/ISLR2/GLI2/CAMK1D/FEZ1/NRP1/TENM4/SYNDIG1/DPYSL3/FZD1/EPHA3/BCL2/MAGI2/IL34/NLGN3/ROBO1/MAP1B/CXCL12/SHANK3/BMPR2/NEGR1/SMARCD3/LRP1/PRKCH/NUMBL/ASPA/FYN/SMO/GDF6/SCN1B/CDON/TGFB1/NAP1L2/PRKN/SRPX2/FGFR1/CSF1/MACF1/ILK/CRTC1/PTN/NGF/P2RY12/FLNA/ITSN1/CREB3L2/NTN1/NCOA1/SCARF…	BP
regulation of leukocyte migration	117/7182	186/17910	2.41741e-10	7.24552e-09	5.41727e-09	117	JAM3/EMILIN1/SLIT2/VEGFC/SELP/IL1R1/CD200/GREM1/CAMK1D/THY1/MSN/THBS4/CXCL12/CD81/CD99L2/TGFB1/RARRES2/DYSF/GAS6/PLVAP/THBS1/CCL2/CSF1/APOD/PTN/P2RY12/IL33/ANO6/STK10/DUSP1/PDGFD/C3AR1/TACR1/BST1/CCL19/AIF1/ITGA4/BDKRB1/SWAP70/CX3CR1/NCKAP1L/MMP14/CCN3/TREM2/DOCK8/CCR2/MPP1/ADORA1/TNFSF14/ZNF580/CCR7/CMKLR1/GPSM3/C5AR1/WNK1/SPN/RIPOR2/TNFSF18/CCR1/IL6R/CCL20/F2RL1/LRCH1/DDT/C1QBP/SMPD3/PLCB1/NBL1…	BP
Wnt signaling pathway	268/7182	498/17910	2.55203e-10	7.61198e-09	5.69126e-09	268	RECK/ZEB2/RBMS3/ADGRA2/HIC1/BICC1/PKD2/GLI1/GPC6/PRICKLE1/MDFIC/DACT1/FZD4/DAB2/NFATC4/GREM1/MCC/GLI3/IGFBP4/WWTR1/PLPP3/RSPO3/DAAM2/FRZB/DKK3/ROR2/FZD1/CALCOCO1/ANKRD6/MAGI2/SKI/FERMT2/SOX17/TRABD2B/TLE4/LRP1/AMOTL1/GNAO1/TGFB1I1/PRICKLE2/SFRP4/LATS2/PKD1/PYGO1/CMAHP/RSPO1/SFRP1/MITF/PRKN/ABL1/DACT3/SFRP2/RNF146/TCF7L1/WLS/WNT2B/TMEM88/LRRK2/DIXDC1/NXN/MACF1/ROR1/ILK/ISL1/FZD8/FGF10/TMEM170B/DAP…	BP
chromosome organization	539/7182	1097/17910	2.55379e-10	7.61198e-09	5.69126e-09	539	NAP1L3/NR3C1/MAP3K12/PRKD1/APBB1/EID1/GEM/PPM1F/CBX7/SKI/PHF21A/USP51/PRMT2/CBX6/SMARCD3/NAP1L5/PRDM6/PHC1/EZH1/TGFB1/NAP1L2/ANKRD53/ABL1/PURA/TCF7L1/PHF1/HDAC5/LRRK2/PRKCB/PINK1/SAP30L/PRDM5/JDP2/TINF2/PRDM2/ISL1/HDAC7/SCMH1/TERF2IP/DAPK3/L3MBTL3/KAT2B/NCOA1/HSPA2/MECP2/SATB1/CREBBP/TSPYL2/CHD3/EPC2/ZWINT/PER1/DUSP1/NACC2/MYOCD/SMG6/TAL1/LDB1/CDK1/TSPYL4/CHD9/SNAI2/AGO4/ING4/SETMAR/GATA2/PTTG1/A…	BP
myeloid cell differentiation	227/7182	411/17910	2.71059e-10	8.05709e-09	6.02405e-09	227	FBN1/MEF2C/FLI1/FAM20C/STAT5B/RBFOX2/GAB3/MAFB/ROR2/NOTCH2/IL34/SNRK/CSF1R/PIP4K2A/TGFBR2/LRRC17/MEIS1/ADD1/EPAS1/GPR183/CD81/ADGRF5/TGFB1/SH3PXD2A/SFRP1/SH2B3/PDE1B/MITF/PIK3R1/ETS1/THBS1/RASGRP4/NRROS/PRKCB/TGFBR3/TSPAN2/CSF1/WASF2/ARNT/RASSF2/ACTN1/KLF10/L3MBTL3/KAT2B/AGO3/OSTM1/MYL9/ZBTB16/ITPKB/CREBBP/MYH9/NME1/TFE3/ZFP36L1/TAL1/LDB1/FES/FOXP1/TNRC6C/KIT/CD4/PAFAH1B1/TNRC6A/ZBTB46/CCL19/CCN4…	BP
epithelial tube morphogenesis	180/7182	313/17910	2.77129e-10	8.2149e-09	6.14204e-09	180	ZEB2/PKD2/SLIT2/TCF21/DCHS1/ENG/PRICKLE1/EDNRA/DLC1/NFATC4/GREM1/AR/MEF2C/GLI3/FAT4/GLI2/CLIC4/ACVRL1/NRP1/RASIP1/CC2D2A/FZD1/FOXF1/BCL2/PBX1/SKI/CSF1R/SOX17/TGFBR2/SMO/PKD1/NOTCH4/FGF2/TGFB1/FGF1/SPRY1/SFRP1/ABL1/SFRP2/WNT2B/SUFU/PGR/CSF1/ILK/RHOB/SOX18/SEMA4C/PRKACB/FGF10/STARD13/NTN1/COL4A1/TCTN1/MEGF8/HAND2/PRKACA/FOXP1/PLXND1/MICAL2/SRF/ESRP2/TNC/LZTS2/PGF/GJA1/SPINT1/OVOL2/SIX2/MMP14/OSR1/A…	BP
positive regulation of cellular component biogenesis	272/7182	507/17910	2.85856e-10	8.45038e-09	6.31811e-09	272	TEK/PHLDB1/EMILIN1/KIRREL1/FLRT2/NLGN2/LDB2/LPAR1/TGFB3/ARHGEF15/RHOQ/PALM/THY1/NRP1/SYNDIG1/DPYSL3/NAV3/RASIP1/DZIP1/MSN/PPM1F/NLGN3/MAP1B/TRABD2B/PIP4K2A/CCN2/GSN/DOCK11/FCHSD2/SH3PXD2B/JMY/TGFB1/EVL/SFRP1/PHLDB2/ANKRD53/MITF/ABL1/PINK1/SRPX2/P2RX7/SEPTIN7/KDR/COL16A1/WASF2/P2RY12/LMOD1/NOX4/FLNA/FER/MECP2/THBS2/PPP2R5B/SORBS3/CEP120/GPR65/TAL1/AMIGO1/FES/KIT/NIN/TACR1/CCL19/TGFBR1/LRRC4B/TPM1/…	BP
tissue migration	204/7182	363/17910	2.97008e-10	8.75605e-09	6.54665e-09	204	ZEB2/ADGRA2/TEK/MAP3K3/CLEC14A/MMRN2/DCN/PECAM1/PTPRM/AKT3/SLIT2/TNFSF12/VEGFC/RHOJ/CYP1B1/PRKD1/MEOX2/TBXA2R/SERPINF1/ARSB/GREM1/MCC/MEF2C/FGF7/ACVRL1/NRP1/KANK2/ANGPT1/GLIPR2/PPM1F/FOXF1/VASH1/ROBO1/BMPR2/SPARC/TGFBR2/FLT4/AMOTL1/ACTA2/FGF2/SMOC2/TGFB1/NR2F2/FGF1/EVL/ABL1/NRP2/ETS1/THBS1/HDAC5/IQSEC1/SRPX2/FGFR1/MACF1/BMPER/SASH1/PTN/KDR/RHOB/SOX18/HDAC7/MAPRE2/ITGB3/FGF10/STARD13/RAB25/ATOH8/F…	BP
regulation of JNK cascade	108/7182	169/17910	3.04396e-10	8.9494e-09	6.69121e-09	108	ZEB2/MAP3K12/MDFIC/DACT1/FZD4/SH3RF3/ROR2/NRK/NOD1/CCN2/PJA2/FLT4/SFRP1/PRKN/SFRP2/PINK1/HIPK3/FCGR2B/DUSP3/SASH1/RASSF2/FZD8/RAPGEF1/PER1/FZD7/CYLD/PAFAH1B1/CCL19/GADD45B/MAP3K20/TLR4/EDA2R/FGD2/PKN1/AIDA/TIAM1/ZMYND11/MAP3K21/SIRPA/TRAF4/CCR7/MAP3K6/EPHA4/MAP2K7/TAOK1/ARHGEF5/DUSP19/TRAF6/F2RL1/MAP3K2/SLAMF1/TLR6/MAP4K5/DVL2/CD40LG/MAP3K7/MAPK8IP1/MAP3K9/PLCB1/MARVELD3/MAP4K4/DVL3/APP/TIRAP/DTN…	BP
regulation of stress-activated protein kinase signaling cascade	135/7182	222/17910	3.06876e-10	8.99782e-09	6.7274e-09	135	ZEB2/MAP3K3/MAP3K12/MDFIC/DACT1/FZD4/HGF/SH3RF3/ROR2/NRK/NOD1/CCN2/PJA2/FLT4/GDF6/SFRP1/PRKN/SFRP2/PINK1/HIPK3/FCGR2B/DUSP3/SASH1/RASSF2/SEMA4C/FZD8/RAPGEF1/PER1/DUSP1/FZD7/HAND2/CYLD/PAFAH1B1/PBK/CCL19/GADD45B/MAP3K20/ARL6IP5/TLR4/EDA2R/FOXO1/FGD2/PKN1/AIDA/TIAM1/ZMYND11/EZR/MAP3K21/SIRPA/TRAF4/CCR7/MAP3K6/EPHA4/MAP2K7/TAOK1/ARHGEF5/DUSP19/PRDX1/TRAF6/F2RL1/MAP3K2/SLAMF1/TLR6/MAP4K5/DVL2/ZC3H12A…	BP
apoptotic signaling pathway	305/7182	579/17910	3.48831e-10	1.01946e-08	7.62222e-09	305	SEPTIN4/HIC1/TNFSF12/ITPR1/CYP1B1/PTGIS/NFATC4/TIMP3/AR/HGF/PEA15/NRP1/PPM1F/SRPX/BCL2/CXCL12/GNAI2/GSN/MEIS3/FYN/TGFB1/SFRP1/PRKN/PIK3R1/ABL1/SFRP2/THBS1/HIP1/LRRK2/PINK1/PHLDA3/P2RX7/FGFR1/NGF/IGF1/FGF10/DAPK3/IL33/ITGAV/LY96/NACC2/ACKR3/HYAL2/CYLD/CD14/CD28/SNAI2/TGFBR1/ARL6IP5/TFDP2/NOS3/TLR4/AIFM1/EDA2R/WDR35/ITGAM/PTEN/MOAP1/PELI3/FEM1B/KRT18/BEX3/ITPRIP/KRT8/SLC25A5/UACA/CFLAR/CX3CR1/CLU/F…	BP
carbohydrate derivative metabolic process	570/7182	1169/17910	3.49584e-10	1.01946e-08	7.62222e-09	570	PDE1A/MAN1C1/GUCY1B1/GUCY1A1/DCN/PDGFRB/CSGALNACT2/HTR2A/NPR2/GPC6/LUM/OMD/SDC2/ARSB/GALNT16/PRELP/RHOQ/GALNT17/ITIH5/HGF/FAM20C/RORA/OGN/CHST7/PDE2A/ANGPT1/PDE5A/ADCY4/BGN/ST6GALNAC5/PDE7B/BCL2/CHSY3/HSPG2/GXYLT2/VCAN/BMPR2/ADCY9/DSEL/GIMAP7/DSE/NPR1/SMPD1/NDST1/ADCY5/ST6GALNAC6/VEGFB/FGF2/TGFB1/GUCY1A2/TRAK2/ISCU/ST3GAL3/CHST12/AASS/EOGT/LRRK2/CHST14/ITIH3/PINK1/P2RX7/SDC3/FUT11/DLG2/PRXL2C/A4G…	BP
regulation of MAP kinase activity	184/7182	322/17910	3.59281e-10	1.04492e-08	7.81254e-09	184	ZEB2/MAPK10/MAP3K3/PDGFRB/HTR2A/MAP3K12/C1QTNF2/MDFIC/FZD4/LPAR1/TGFB3/HGF/PEA15/PDE5A/ROR2/ROBO1/NRK/NOD1/GHR/SMPD1/CD81/F2R/FGF2/TGFB1/FGF1/SFRP1/SH2B3/SFRP2/THBS1/ITGA1/LRRK2/HIPK3/P2RX7/FGFR1/ILK/DUSP3/SASH1/NGF/IGF1/FZD8/FGF10/NOX4/CSPG4/KSR1/RAPGEF1/SHC2/RGS4/DUSP1/MAPK11/PIK3R5/PIK3R6/RGS2/HYAL2/KIT/CDK1/CCL19/GADD45B/TGFBR1/MAP3K20/FLT1/TLR4/MAP3K14/HTR2B/FGD2/KIDINS220/PKN1/AIDA/SHC1/TIA…	BP
axonogenesis	218/7182	393/17910	3.63848e-10	1.05535e-08	7.89057e-09	218	ZEB2/NDN/CNTN4/LAMA2/PTPRM/BOC/SLIT2/CDH11/DOK6/FLRT2/APBB1/SPART/DOK5/SLIT3/GLI3/ISLR2/GLI2/FEZ1/THY1/NRP1/ADARB1/KLF7/BCL2/NLGN3/ROBO1/MAP1B/CSF1R/MYH10/CXCL12/SHANK3/BMPR2/LAMB2/LRP1/NUMBL/GAB1/FYN/SCN1B/SEMA3G/ATL1/EVL/TRAK2/PIK3R1/ABL1/PLXNA4/DPYSL2/NRP2/SEMA6C/GFRA2/SYNGAP1/MATN2/GFRA1/MACF1/ILK/CRMP1/NGF/ULK2/ISL1/PDLIM7/VCL/NTN1/UNC5C/TCTN1/NFIB/NFASC/MYOT/ITGB1/MEGF8/NGFR/RTN4/NRXN3/ANOS…	BP
positive regulation of supramolecular fiber organization	116/7182	185/17910	3.83456e-10	1.10925e-08	8.29351e-09	116	KIRREL1/LPAR1/TGFB3/ARHGEF15/NRP1/NAV3/PPM1F/MAP1B/CCN2/GSN/FCHSD2/SH3PXD2B/JMY/EVL/SFRP1/ANKRD53/ABL1/LMOD1/NOX4/FLNA/FER/MECP2/SORBS3/GPR65/FES/NIN/TACR1/CFL2/TGFBR1/TPM1/TOGARAM1/ABI2/DSTN/STMN2/SWAP70/NCKAP1L/CLU/MAPT/CLASP1/MAGEL2/CDKN1B/WASF1/ARPIN/DCTN1/SLAIN2/PRKCE/WASHC2C/MYO1C/CCR7/ID1/NUMA1/ARHGEF10/SNX9/LIMCH1/TAC1/SPIRE1/RGCC/CLIP1/ARHGEF5/SEMA5A/SPIRE2/F2RL1/RAPGEF3/HCK/ARL2/ACTN2/M…	BP
regulation of cell-cell adhesion	216/7182	389/17910	3.87912e-10	1.11914e-08	8.36745e-09	216	LRRC32/IL6ST/GLI3/GLI2/PLPP3/PRKG1/STAT5B/THY1/PDE5A/PPM1F/CXCL12/MYADM/TGFBR2/FYN/CD81/HLX/ADAM19/TGFB1/TWSG1/MDGA1/LOXL3/SH2B3/SOCS5/PIK3R1/ABL1/ETS1/FCGR2B/CCL2/DUSP3/ZMIZ1/CD1D/IGF1/LGALS1/EPCAM/ZBTB16/CITED2/ITPKB/C1QTNF1/CCM2L/GPNMB/RDX/PIK3R6/CYLD/DUSP22/PIK3CA/CD4/VCAM1/TMEM131L/CD28/SERPINE2/CCL19/AIF1/SNAI2/PRNP/PDPN/NLRP3/BCL6/ITGA4/DTX1/SWAP70/PRKAR1A/CD209/TESPA1/IL4R/NCKAP1L/PODXL/I…	BP
endothelium development	84/7182	124/17910	4.06525e-10	1.16971e-08	8.74558e-09	84	S1PR1/HEG1/CD34/PECAM1/ENG/S1PR3/CDH5/ZEB1/CLIC4/GJA4/ACVRL1/NRP1/PDE2A/MSN/SOX17/BMPR2/MYADM/ADD1/GJA5/NOTCH4/NR2F2/FGF1/PTN/KDR/RHOB/SOX18/STARD13/COL18A1/ATOH8/FOXJ2/TMEM100/RAPGEF1/CLDN5/RDX/RAP1A/PPP1R16B/FOXP1/PDPN/ARHGEF26/BMP6/PTPRS/HEY2/GJA1/ADAMTS12/VEZF1/CXCR4/EZR/PDE4D/SCUBE1/F11R/ROCK1/DLL4/TNFRSF1A/FOXC2/ID1/RAPGEF2/RBPJ/DLL1/TJP1/F2RL1/SMAD4/RAPGEF3/S1PR2/BTG1/ITGAX/RAP1B/ACVR1/STC…	BP
regulation of adherens junction organization	52/7182	67/17910	4.18558e-10	1.20113e-08	8.98049e-09	52	TEK/DLC1/GREM1/ACVRL1/THY1/NRP1/PPM1F/EPHA3/ADD1/PEAK1/LRP1/SFRP1/PHLDB2/ABL1/THBS1/FAM107A/IQSEC1/MACF1/DUSP3/APOD/KDR/COL16A1/MAPRE2/DAPK3/RDX/ARHGAP6/GPM6B/LDB1/DUSP22/PTEN/CORO1C/MMP14/CLASP1/ROCK1/LIMCH1/LIMS1/CLASP2/MYOC/MAP4K4/ITGB1BP1/SLC9A1/CAMSAP3/IQGAP1/EFNA5/RHOA/S100A10/RAC1/TSC1/ROCK2/SRC/RHOD/RCC2	BP
substrate adhesion-dependent cell spreading	63/7182	86/17910	4.26632e-10	1.22105e-08	9.12943e-09	63	TEK/FBLN1/FZD4/ANTXR1/PARVA/NRP1/FERMT2/MYADM/PEAK1/ABL1/LAMB1/ILK/RADIL/ITGB3/PREX1/FLNA/ITGAV/FER/LAMC1/AXL/BVES/FZD7/FN1/MERTK/PDPN/ITGA4/CORO1C/DOCK1/TRIOBP/CASS4/WASHC2C/KIF14/ITGA8/POSTN/LIMS1/NEDD9/C1QBP/MYOC/HAS2/KANK1/ARHGEF7/ITGB1BP1/SRGAP2/CARMIL1/LAMA5/CIB1/AP1AR/TACSTD2/DNM2/DOCK5/EFNA5/S100A10/EFNA1/ITGB7/EPHB3/RAC1/RAC3/CALR/SRC/MDK/EPHA1/RCC2/CRK	BP
cell-cell signaling by wnt	268/7182	500/17910	4.36676e-10	1.24649e-08	9.31966e-09	268	RECK/ZEB2/RBMS3/ADGRA2/HIC1/BICC1/PKD2/GLI1/GPC6/PRICKLE1/MDFIC/DACT1/FZD4/DAB2/NFATC4/GREM1/MCC/GLI3/IGFBP4/WWTR1/PLPP3/RSPO3/DAAM2/FRZB/DKK3/ROR2/FZD1/CALCOCO1/ANKRD6/MAGI2/SKI/FERMT2/SOX17/TRABD2B/TLE4/LRP1/AMOTL1/GNAO1/TGFB1I1/PRICKLE2/SFRP4/LATS2/PKD1/PYGO1/CMAHP/RSPO1/SFRP1/MITF/PRKN/ABL1/DACT3/SFRP2/RNF146/TCF7L1/WLS/WNT2B/TMEM88/LRRK2/DIXDC1/NXN/MACF1/ROR1/ILK/ISL1/FZD8/FGF10/TMEM170B/DAP…	BP
myeloid leukocyte activation	338/7182	652/17910	4.49662e-10	1.28017e-08	9.57148e-09	338	TIMP2/PECAM1/RAB31/CRISPLD2/CD200/ARSB/PLEKHO2/STOM/RORA/CD93/FOXF1/CYB5R3/STING1/ATP8B4/TGFBR2/PTPRB/PJA2/GSN/ADGRF5/TGFB1/DYSF/AP1M1/VPS35L/PRCP/YPEL5/THBS1/CRTC3/LRRK2/VAMP2/FCGR2B/CSF1/TLR7/PREX1/C3/LAIR1/FGL2/IL33/DEGS1/VCL/ITGAV/FER/MILR1/ANO6/NFASC/RAB9B/STK10/RAP1A/GLIPR1/HYAL2/FES/FOXP1/C3AR1/KIT/CD14/BST1/TLR1/AIF1/VAT1/METTL7A/GYG1/GATA2/TLR4/HGSNAT/GMFG/PRSS3/PRAM1/ITGAM/ATM/PIK3CD/MA…	BP
cellular response to transforming growth factor beta stimulus	140/7182	233/17910	4.70334e-10	1.3355e-08	9.98516e-09	140	NR3C1/LRRC32/EMILIN1/LDLRAD4/LTBP1/FBN1/ENG/LTBP2/DAB2/TGFB3/CDH5/MEF2C/ZEB1/ACVRL1/DKK3/PDE2A/ASPN/COL4A2/SKI/FERMT2/TGFBR2/LTBP4/TGFB1I1/FYN/TGFB1/TWSG1/SFRP1/CILP/PDE3A/THBS1/NRROS/HTRA1/TGFBR3/HTRA3/COL1A2/COL3A1/NOX4/ZYX/CITED2/CREBBP/CLDN5/ITGB5/MYOCD/PDGFD/SMAD9/ZFP36L1/CLEC3B/HYAL2/SOX5/TGFBR1/VASN/LOX/GDF10/COL1A1/GOT1/CFLAR/OVOL2/GLG1/CX3CR1/FLCN/SMAD5/CREB1/PPM1A/ZFYVE9/F11R/FMOD/CAV1/…	BP
response to decreased oxygen levels	204/7182	365/17910	5.6298e-10	1.59437e-08	1.19207e-08	204	TEK/CD34/ITPR1/RAMP2/EDNRA/PTGIS/TGFB3/SOD3/CYGB/RORA/ACVRL1/BCL2/CXCL12/TGFBR2/CCN2/EPAS1/WTIP/TGFB1/SFRP1/ETS1/PLAT/THBS1/CRYAB/PINK1/TGFBR3/COX4I2/PTN/ARNT/SLC8A1/PAM/KCNMA1/NOX4/MECP2/CITED2/CREBBP/KCNMB1/MYOCD/TRPC6/ZFP36L1/AQP1/KCNK2/VCAM1/VASN/SRF/AIFM1/PTEN/CCNB1/ATM/PLOD2/CCNA2/CFLAR/SLC2A4/MMP14/CBFA2T3/APOLD1/CXCR4/CREB1/ERO1A/S100B/CDKN1B/KCNK3/ADORA1/KCNA5/ATP1B1/PRKCE/SIRT2/TWIST1/R…	BP
immune response	992/7182	2148/17910	6.3193e-10	1.78495e-08	1.33456e-08	992	A2M/C1S/C1R/MAPK10/TIMP2/IL6ST/JAM3/CD34/PECAM1/TNFSF12/SERPING1/PRKD1/IL1R1/RAB31/CRISPLD2/CD200/ARSB/CYSLTR1/PLEKHO2/TGFB3/COLEC12/SSC5D/MEF2C/STOM/C1RL/STAT5B/RORA/CD93/THY1/C4A/ADARB1/GEM/ANGPT1/VIM/CTSK/NOTCH2/CMTM3/FOXF1/CYB5R3/BCL2/IL34/C7/STING1/CSF1R/ATP8B4/CXCL12/TRIL/MID2/NOD1/PTPRB/PJA2/GSN/GPR183/DOCK11/LRP1/PRKCH/ARID5A/FYN/CD81/HLX/WIPF1/TGFB1/RARRES2/EVL/DYSF/C4B/AP1M1/VPS35L/LOXL…	BP
activation of protein kinase activity	174/7182	303/17910	6.37698e-10	1.79654e-08	1.34322e-08	174	MAPK10/MAP3K3/MAP3K12/C1QTNF2/MDFIC/LPAR1/TGFB3/GREM1/HGF/PEA15/ANGPT1/ADCY4/NRK/TGFBR2/NOD1/ADCY9/GHR/CD81/F2R/ADCY5/FGF2/FGF1/ABL1/PDGFC/GAS6/THBS1/ITGA1/LRRK2/PINK1/P2RX7/NGF/IGF1/ITGB3/PRKACB/FGF10/CSPG4/RAPGEF1/SHC2/PRKAR2B/MAPK11/PRKACA/ADRB2/KIT/PIK3CA/MAPKAP1/CDK1/CCL19/GADD45B/TGFBR1/CHRNA3/MAP3K20/PRKAG2/TLR4/ADCY2/MAP3K14/PPP2R3C/CCDC88A/KIDINS220/PRKAR1A/PKN1/TXN/NCKAP1L/SHC1/CXCR4/CO…	BP
response to drug	475/7182	958/17910	6.51773e-10	1.83141e-08	1.36929e-08	475	IGFBP7/TIMP2/NR3C1/GUCY1B1/PTPRM/PDGFRB/SLIT2/VEGFC/HTR2A/FIBIN/ENG/RAMP2/CYP1B1/TBXA2R/SERPINF1/FZD4/TGFB3/CYGB/SLIT3/HGF/MEF2C/PEA15/PDE2A/VIM/PPM1F/FZD1/KLF9/BCL2/MAP1B/CXCL12/SPARC/CDO1/TGFBR2/NOD1/GNAI2/GSN/GNAO1/FYN/SMPD1/ADCY5/TXNIP/VEGFB/TGFB1/SFRP1/PDE1B/PRKN/ABL1/SFRP2/PDE3A/GAS6/ETS1/GNA12/LDOC1/MTR/THBS1/FOLR2/CRYAB/HDAC5/LRRK2/ABCA1/NSMCE3/PINK1/P2RX7/NLRP1/APOD/PPP1R14A/PTN/KDR/SSH1…	BP
regulation of cell cycle process	388/7182	764/17910	6.73357e-10	1.88715e-08	1.41097e-08	388	FBXL7/PKD2/PDGFRB/GLI1/DACT1/FOXN3/KANK2/BCL2/PBX1/TUBA1A/CCN2/USP51/PRMT2/SMARCD3/PHC1/UBE2E2/PKD1/ADAMTS1/TGFB1/CTDSP2/SFRP1/ANKRD53/PDE3A/FAM107A/FGFR1/CCL2/SEPTIN7/FHL1/IGF1/CCDC8/ATP2B4/FGF10/MAP9/DAPK3/KAT2B/SVIL/FAP/GNAI1/HSPA2/MECP2/PPP2R5B/GPNMB/RDX/PRKAR2B/DUSP1/NACC2/UVRAG/PRKACA/CEP120/ZFP36L1/FBXO31/RAB11FIP3/POC1A/PAFAH1B1/CDK1/CD28/AIF1/TFDP2/SETMAR/BCL6/HMMR/PHC3/PTEN/CCNB1/ATM/KL…	BP
mononuclear cell proliferation	146/7182	246/17910	6.82882e-10	1.90889e-08	1.42722e-08	146	LRRC32/IL6ST/MEF2C/STAT5B/PDE5A/MSN/BCL2/TGFBR2/GPR183/FYN/CD81/TGFB1/TWSG1/ABL1/PURA/P2RX7/FCGR2B/TNFSF8/CSF1/CD1D/IGF1/FGF10/SATB1/GPNMB/CD4/VCAM1/TMEM131L/CD28/TACR1/CCL19/AIF1/PRNP/PPP3CB/TLR4/BCL6/ATM/PRKAR1A/CD209/GJA1/PKN1/PLCL2/NCKAP1L/NFATC2/IL7R/SOS1/VSIR/DOCK8/CCR2/AZI2/TNFSF4/VSIG4/TNFSF14/HSPD1/TYROBP/LMO1/LILRB1/SPN/TAC1/LST1/TNFSF18/HPRT1/LILRB2/DOCK2/PDCD1LG2/AHR/CD276/TRAF6/BTK/C…	BP
lymphocyte proliferation	145/7182	244/17910	6.88425e-10	1.91941e-08	1.43508e-08	145	LRRC32/IL6ST/MEF2C/STAT5B/PDE5A/MSN/BCL2/TGFBR2/GPR183/FYN/CD81/TGFB1/TWSG1/ABL1/PURA/P2RX7/FCGR2B/TNFSF8/CD1D/IGF1/FGF10/SATB1/GPNMB/CD4/VCAM1/TMEM131L/CD28/TACR1/CCL19/AIF1/PRNP/PPP3CB/TLR4/BCL6/ATM/PRKAR1A/CD209/GJA1/PKN1/PLCL2/NCKAP1L/NFATC2/IL7R/SOS1/VSIR/DOCK8/CCR2/AZI2/TNFSF4/VSIG4/TNFSF14/HSPD1/TYROBP/LMO1/LILRB1/SPN/TAC1/LST1/TNFSF18/HPRT1/LILRB2/DOCK2/PDCD1LG2/AHR/CD276/TRAF6/BTK/CD6/CD…	BP
positive regulation of immune system process	532/7182	1087/17910	7.067e-10	1.96528e-08	1.46938e-08	532	A2M/C1S/C1R/IL6ST/VEGFC/SELP/SERPING1/IL1R1/COLEC12/MEF2C/GLI3/GLI2/CAMK1D/C1RL/STAT5B/THY1/C4A/ROR2/CTSK/CMTM3/FOXF1/BCL2/IL34/C7/STING1/THBS4/CXCL12/TRIL/TGFBR2/NOD1/PJA2/GPR183/PRKCH/FYN/CD81/HLX/WIPF1/CD99L2/TGFB1/RARRES2/DYSF/C4B/SOCS5/PIK3R1/ABL1/CFH/CLEC10A/GAS6/ETS1/PLVAP/THBS1/LRRK2/PRKCB/P2RX7/FCGR2B/CCL2/CSF1/ELMO1/DUSP3/ZMIZ1/CD1D/PTN/WASF2/IGF1/P2RY12/ARNT/TLR7/LGALS1/PRKACB/KLF10/FG…	BP
cell growth	251/7182	466/17910	8.45093e-10	2.33946e-08	1.74915e-08	251	FBLN5/ZEB2/IGFBP7/NDN/SLIT2/IGFBP5/APBB1/SPART/GREM1/SLIT3/IGFBP4/ISLR2/ACVRL1/FRZB/NRP1/RERG/BCL2/NLGN3/MAP1B/SOX17/CXCL12/BMPR2/TGFBR2/PRMT2/LTBP4/LAMB2/LRP1/CLSTN3/NPR1/SEMA3G/TGFB1/SFRP1/PRKN/ABL1/PLXNA4/DACT3/SFRP2/DPYSL2/NRP2/MEG3/CRYAB/FAM107A/PTCH2/MACF1/ILK/FHL1/ULK2/IGF1/EPB41L3/PI16/VCL/NTN1/TSPYL2/AVPR1A/RGS4/ITGB1/MEGF8/MYOCD/RTN4/PRDM11/RGS2/OLFM1/HYAL2/AKAP6/SEMA5B/FN1/PAFAH1B1/NIN…	BP
regulation of actin filament bundle assembly	67/7182	94/17910	8.45588e-10	2.33946e-08	1.74915e-08	67	S1PR1/DLC1/LPAR1/TGFB3/ARHGEF15/NRP1/PPM1F/SHANK3/CCN2/SH3PXD2B/EVL/SFRP1/PHLDB2/PRKN/PIK3R1/ABL1/WASF2/NOX4/FLNA/ASAP3/SORBS3/RDX/ARHGAP6/GPR65/TACR1/TGFBR1/TPM1/SWAP70/CORO2B/CLASP1/INPP5K/ARAP1/ROCK1/BBS4/ID1/ARHGEF10/LIMCH1/TAC1/RGCC/ARHGEF5/CLASP2/RAPGEF3/MYOC/ITGB1BP1/CARMIL1/PTGER4/TACSTD2/WAS/SLC9A1/STMN1/TESK1/RHOA/S100A10/RAC1/PAK1/TSC1/FHOD1/ROCK2/PLEK/PXN/PPP1R9A/ARHGEF10L/VIL1/EPHA1/…	BP
regulation of focal adhesion assembly	48/7182	61/17910	8.52135e-10	2.34554e-08	1.75369e-08	48	TEK/DLC1/GREM1/ACVRL1/THY1/NRP1/PPM1F/EPHA3/PEAK1/LRP1/SFRP1/PHLDB2/ABL1/THBS1/FAM107A/MACF1/DUSP3/APOD/KDR/COL16A1/DAPK3/ARHGAP6/GPM6B/LDB1/DUSP22/PTEN/CORO1C/MMP14/CLASP1/ROCK1/LIMCH1/LIMS1/CLASP2/MYOC/MAP4K4/ITGB1BP1/SLC9A1/CAMSAP3/IQGAP1/EFNA5/RHOA/S100A10/RAC1/TSC1/ROCK2/SRC/RHOD/RCC2	BP
regulation of cell-substrate junction assembly	48/7182	61/17910	8.52135e-10	2.34554e-08	1.75369e-08	48	TEK/DLC1/GREM1/ACVRL1/THY1/NRP1/PPM1F/EPHA3/PEAK1/LRP1/SFRP1/PHLDB2/ABL1/THBS1/FAM107A/MACF1/DUSP3/APOD/KDR/COL16A1/DAPK3/ARHGAP6/GPM6B/LDB1/DUSP22/PTEN/CORO1C/MMP14/CLASP1/ROCK1/LIMCH1/LIMS1/CLASP2/MYOC/MAP4K4/ITGB1BP1/SLC9A1/CAMSAP3/IQGAP1/EFNA5/RHOA/S100A10/RAC1/TSC1/ROCK2/SRC/RHOD/RCC2	BP
positive regulation of epithelial cell migration	109/7182	173/17910	8.57042e-10	2.35305e-08	1.75931e-08	109	ADGRA2/TEK/MAP3K3/AKT3/VEGFC/RHOJ/PRKD1/PLPP3/FGF7/NRP1/ANGPT1/GLIPR2/PPM1F/BMPR2/SPARC/TGFBR2/FLT4/AMOTL1/FGF2/SMOC2/TGFB1/FGF1/ABL1/NRP2/ETS1/THBS1/IQSEC1/SRPX2/FGFR1/SASH1/KDR/RHOB/HDAC7/MAPRE2/ITGB3/FGF10/RAB25/ATOH8/RTN4/FOXP1/TACR1/NOS3/GATA2/STAT5A/DOCK1/ENPP2/CLASP1/PLCG1/PDGFB/PRKCE/ZNF580/EPB41L4B/FOXC2/TAC1/SOX9/ATP5F1B/JUN/SEMA5A/SIRT1/JCAD/CLASP2/GATA3/PDCD6/AAMP/ZC3H12A/TGFB2/HAS2/A…	BP
epithelial cell migration	198/7182	354/17910	9.25248e-10	2.53387e-08	1.8945e-08	198	ZEB2/ADGRA2/TEK/MAP3K3/CLEC14A/MMRN2/DCN/PECAM1/PTPRM/AKT3/SLIT2/TNFSF12/VEGFC/RHOJ/CYP1B1/PRKD1/MEOX2/TBXA2R/SERPINF1/ARSB/GREM1/MCC/MEF2C/FGF7/ACVRL1/NRP1/KANK2/ANGPT1/GLIPR2/PPM1F/VASH1/ROBO1/BMPR2/SPARC/TGFBR2/FLT4/AMOTL1/FGF2/SMOC2/TGFB1/NR2F2/FGF1/EVL/ABL1/NRP2/ETS1/THBS1/HDAC5/IQSEC1/SRPX2/FGFR1/MACF1/BMPER/SASH1/PTN/KDR/RHOB/SOX18/HDAC7/MAPRE2/ITGB3/FGF10/STARD13/RAB25/ATOH8/FAP/MECP2/MYH…	BP
autophagy	253/7182	471/17910	1.02499e-09	2.79284e-08	2.08813e-08	253	DCN/ITPR1/PRKD1/ARSB/LZTS1/HGF/FEZ1/LEPR/RASIP1/SRPX/CTSK/BCL2/STING1/PIP4K2A/MID2/NOD1/TECPR2/PRKN/ABL1/ZFYVE1/FYCO1/GABARAPL1/LRRK2/RAB12/PINK1/ATP6V1G2/RRAGB/HERC1/KDR/ULK2/EPM2A/DEPP1/DAPK3/VPS39/SOGA1/HSPB8/UVRAG/MAP1LC3C/RAB23/PRKACA/ADRB2/PIK3CA/WDR81/PRKAG2/ABL2/HTR2B/ATM/RRAGA/SYNPO2/FOXO1/RNF152/SH3GLB1/TBC1D17/RNF185/FEZ2/VPS13D/CHMP4C/MAP1LC3B/WDFY3/CD84/TRIM22/CLU/ATG4C/TPCN1/FLCN/RA…	BP
process utilizing autophagic mechanism	253/7182	471/17910	1.02499e-09	2.79284e-08	2.08813e-08	253	DCN/ITPR1/PRKD1/ARSB/LZTS1/HGF/FEZ1/LEPR/RASIP1/SRPX/CTSK/BCL2/STING1/PIP4K2A/MID2/NOD1/TECPR2/PRKN/ABL1/ZFYVE1/FYCO1/GABARAPL1/LRRK2/RAB12/PINK1/ATP6V1G2/RRAGB/HERC1/KDR/ULK2/EPM2A/DEPP1/DAPK3/VPS39/SOGA1/HSPB8/UVRAG/MAP1LC3C/RAB23/PRKACA/ADRB2/PIK3CA/WDR81/PRKAG2/ABL2/HTR2B/ATM/RRAGA/SYNPO2/FOXO1/RNF152/SH3GLB1/TBC1D17/RNF185/FEZ2/VPS13D/CHMP4C/MAP1LC3B/WDFY3/CD84/TRIM22/CLU/ATG4C/TPCN1/FLCN/RA…	BP
cellular protein complex disassembly	120/7182	195/17910	1.04082e-09	2.82884e-08	2.11504e-08	120	NAV3/TTBK2/HDGFL3/NCKAP5L/MAP1B/ADD1/GSN/BMERB1/TMOD2/TMOD1/LMOD1/RDX/PLEKHH2/MICAL2/CFL2/DSTN/STMN2/SWAP70/SYNJ1/NES/MRPL12/TRIOBP/CLASP1/APC/MICAL3/ARHGEF2/WASHC2C/MRPL23/KIF2C/MRPL52/APEH/MRPL48/MRPS5/MRPL27/MRPL3/TAOK1/SEMA5A/EIF5A/KIF18B/KIF18A/CLASP2/F2RL1/MRPL15/MRPS34/ACTN2/MRPL13/MRPS2/AURKAIP1/MRPL37/PTCD3/MRPS12/MRPL58/MRPL50/MRPL44/SPTAN1/CARMIL1/KIF24/EIF5AL1/MRPL17/CHCHD1/MRPL16/MRP…	BP
epithelium migration	199/7182	357/17910	1.22999e-09	3.33457e-08	2.49316e-08	199	ZEB2/ADGRA2/TEK/MAP3K3/CLEC14A/MMRN2/DCN/PECAM1/PTPRM/AKT3/SLIT2/TNFSF12/VEGFC/RHOJ/CYP1B1/PRKD1/MEOX2/TBXA2R/SERPINF1/ARSB/GREM1/MCC/MEF2C/FGF7/ACVRL1/NRP1/KANK2/ANGPT1/GLIPR2/PPM1F/VASH1/ROBO1/BMPR2/SPARC/TGFBR2/FLT4/AMOTL1/FGF2/SMOC2/TGFB1/NR2F2/FGF1/EVL/ABL1/NRP2/ETS1/THBS1/HDAC5/IQSEC1/SRPX2/FGFR1/MACF1/BMPER/SASH1/PTN/KDR/RHOB/SOX18/HDAC7/MAPRE2/ITGB3/FGF10/STARD13/RAB25/ATOH8/FAP/MECP2/MYH…	BP
regulation of transport	829/7182	1773/17910	1.25543e-09	3.39502e-08	2.53836e-08	829	CLIC2/LRRC32/CD34/RAMP3/PKD2/PDGFRB/SCN4B/ITPR1/VEGFC/HTR2A/DLG4/C1QTNF2/MDFIC/PRKD1/EDNRA/RAB31/CD200/NLGN2/SYT11/KCNJ8/DAB2/REM1/APBB1/KCND1/TGFB3/EHD2/BACE1/SSC5D/GREM1/RHOQ/TRPC1/MEF2C/GLI3/STOM/CREBL2/CAMK1D/PEA15/CLIC4/FEZ1/THY1/CLIP3/C4A/NRP1/LEPROT/ATP1B2/KLF7/GEM/TUB/MFGE8/ANGPT1/MSN/PPM1F/ANK2/PKIG/EPHA3/FOXF1/BCL2/MAGI2/NLGN3/STON1/MAP1B/CSF1R/MYH10/APLNR/CXCL12/SHANK3/SGIP1/GJA5/GNAI2…	BP
positive regulation of JNK cascade	83/7182	124/17910	1.2748e-09	3.43877e-08	2.57106e-08	83	ZEB2/MAP3K12/MDFIC/FZD4/SH3RF3/ROR2/NRK/NOD1/CCN2/PJA2/FLT4/FCGR2B/SASH1/RASSF2/FZD8/FZD7/CCL19/GADD45B/MAP3K20/TLR4/EDA2R/FGD2/PKN1/TIAM1/MAP3K21/TRAF4/CCR7/MAP3K6/EPHA4/MAP2K7/TAOK1/ARHGEF5/DUSP19/TRAF6/F2RL1/MAP3K2/SLAMF1/TLR6/MAP4K5/DVL2/CD40LG/MAP3K7/MAPK8IP1/MAP3K9/PLCB1/DVL3/APP/TIRAP/SH3RF2/TNFRSF11A/TAOK2/SH3RF1/TNFSF11/MUL1/RIPK1/MAP3K10/GADD45A/PTPN1/HACD3/SDCBP/MAPK8IP3/MAP3K4/CCL21/M…	BP
regulation of cellular catabolic process	409/7182	814/17910	1.32316e-09	3.56032e-08	2.66195e-08	409	DCN/ITPR1/HTR2A/PRICKLE1/PRKD1/DACT1/DAB2/MAP1A/LZTS1/TIMP3/ECSCR/HGF/FEZ1/LEPR/RASIP1/VIM/MSN/BCL2/STING1/PIP4K2A/MID2/NOD1/FTO/LRP1/CD81/PKD1/SOCS5/PRKN/ABL1/FYCO1/GNA12/SUFU/LRRK2/RAB12/PINK1/ATP6V1G2/P2RX7/RRAGB/HERC1/PRXL2C/FBXL5/CIRBP/KDR/IGF1/EPM2A/ARNT/ZBTB20/ATP2B4/DEPP1/ABCD2/DAPK3/IL33/MYLIP/ACACB/RDX/SOGA1/HSPB8/UVRAG/PRKACA/ADRB2/ZFP36L1/TNRC6C/TIMP1/PIK3CA/PKP3/SH3D19/PBK/SNX33/PRKA…	BP
mitotic cell cycle phase transition	296/7182	565/17910	1.35092e-09	3.62598e-08	2.71104e-08	296	FBXL7/PKD2/DACT1/FOXN3/LZTS1/KANK2/BCL2/PBX1/TUBA1A/PRMT2/SMARCD3/UBE2E2/LATS2/PKD1/ADAMTS1/TGFB1/CTDSP2/KLF11/FAM107A/CCL2/SEPTIN7/FHL1/FGF10/CKS2/HSPA2/MECP2/GPNMB/RDX/PRKAR2B/PPP1R12B/ITGB1/DUSP1/NACC2/PRKACA/ZFP36L1/FBXO31/PAFAH1B1/CDK1/AIF1/TFDP2/HMMR/PTEN/CCNB1/ATM/HECW2/PPP1R12A/MAD2L1/RBL2/PKIA/NES/SLFN11/XPC/CCNA2/CDC25A/CHMP4C/BRSK1/ORC6/ID4/ACTR1A/CCNB2/PLK4/MELK/CLASP1/PCNA/CDC20/TUBB…	BP
organic substance catabolic process	894/7182	1925/17910	1.3608e-09	3.64344e-08	2.72409e-08	894	PDE1A/FBXL7/GGT5/DCN/ENTPD1/TNFSF12/HTR2A/CPQ/GPC6/LUM/PRICKLE1/CYP1B1/OMD/DACT1/SDC2/ARSB/DAB2/KCTD10/MAP1A/PRELP/TIMP3/ECSCR/WWTR1/GPRASP1/OGN/RNF217/SPSB1/PDE2A/PDE5A/VIM/MSN/CTSK/BGN/PDE7B/HSPG2/SOX17/VCAN/CDO1/USP51/FTO/LRP1/ASPA/TGFB1I1/FYN/SMPD1/CD81/PKD1/FGF2/TGFB1/RARRES2/DYSF/SOCS5/SNX1/PRKN/KLHL20/RNF146/RNF122/AASS/GNA12/COLQ/SUFU/PPM1K/RNASE6/CRTC3/LRRK2/RAB12/PINK1/P2RX7/AZIN2/SDC3/…	BP
cartilage development	113/7182	182/17910	1.5014e-09	4.00991e-08	2.9981e-08	113	MGP/EVC/LUM/THBS3/MAF/GREM1/EFEMP1/MEF2C/GLI3/ZEB1/PRRX1/GLI2/ACVRL1/FRZB/ROR2/CTSK/BMPR2/TGFBR2/CCN2/MEF2D/GDF6/PKD1/FGF2/TGFB1/SFRP2/PTH1R/WNT2B/FGFR1/CHRDL2/CREB3L2/SULF1/ZBTB16/CCN1/NFIB/RARB/TRPS1/HAND2/WNT9A/HYAL2/SOX5/POC1A/TIMP1/BMPR1A/SNAI2/TGFBR1/CCN4/SRF/BMP6/CYTL1/COL1A1/TGFBI/CHSY1/SNX19/GLG1/SIX2/OSR1/ADAMTS12/SMAD5/HOXA5/CCN3/BMP1/NOG/SERPINH1/ADAMTS7/BMP8A/ESRRA/SOX9/SMAD1/CSGALNA…	BP
microtubule cytoskeleton organization	247/7182	460/17910	1.69223e-09	4.50844e-08	3.37083e-08	247	PHLDB1/PKD2/MAP1A/MAP7D3/CLIP3/EML1/CEP68/NAV3/CC2D2A/EPHA3/TTBK2/HDGFL3/NCKAP5L/MAP1B/STARD9/MAP6/BMERB1/SUN2/PKD1/KATNAL1/SPRY1/PHLDB2/ANKRD53/TACC1/CCDC69/ABL1/CCSER2/CRYAB/FAM107A/MAP4/HOOK3/DIXDC1/CRMP1/CCDC8/FGF10/TTLL11/FLNA/MAP9/KAT2B/FER/GNAI1/MECP2/MYH9/CHD3/CEP126/JHY/UVRAG/SRGAP2C/CEP120/FES/CYLD/POC1A/PCLAF/PAFAH1B1/NIN/CDK1/DNAL1/TUBG2/VAMP4/CNTLN/TOGARAM1/RASSF7/CROCC/CCNB1/PPP1R12…	BP
positive regulation of stress-activated MAPK cascade	99/7182	155/17910	1.72521e-09	4.58499e-08	3.42806e-08	99	ZEB2/MAP3K3/MAP3K12/MDFIC/FZD4/SH3RF3/ROR2/NRK/NOD1/CCN2/PJA2/FLT4/GDF6/FCGR2B/SASH1/RASSF2/SEMA4C/FZD8/FZD7/HAND2/CCL19/GADD45B/MAP3K20/ARL6IP5/TLR4/EDA2R/FGD2/PKN1/TIAM1/MAP3K21/TRAF4/CCR7/MAP3K6/EPHA4/MAP2K7/TAOK1/ARHGEF5/DUSP19/TRAF6/F2RL1/MAP3K2/SLAMF1/TLR6/MAP4K5/DVL2/ZC3H12A/CD40LG/HMGCR/TGFB2/MAP3K7/MAPK8IP1/MAP3K9/PLCB1/INAVA/DVL3/APP/TIRAP/SH3RF2/TNFRSF11A/TAOK2/SH3RF1/TNFSF11/MUL1/RIPK…	BP
myeloid leukocyte mediated immunity	288/7182	549/17910	1.89375e-09	5.02054e-08	3.75371e-08	288	TIMP2/PECAM1/RAB31/CRISPLD2/ARSB/PLEKHO2/STOM/CD93/FOXF1/CYB5R3/STING1/ATP8B4/PTPRB/GSN/AP1M1/VPS35L/PRCP/YPEL5/VAMP2/FCGR2B/C3/LAIR1/SPON2/FGL2/DEGS1/VCL/ITGAV/MILR1/ANO6/NFASC/RAB9B/STK10/RAP1A/GLIPR1/FES/C3AR1/KIT/CD14/BST1/VAT1/METTL7A/GYG1/GATA2/HGSNAT/GMFG/PRSS3/PRAM1/ITGAM/PIK3CD/MAN2B1/IL4R/CD84/ADA2/NCKAP1L/CD36/FCN1/HVCN1/CR1/CFP/FCGR2A/TUBB4B/CCR2/PPIA/SIRPA/SIGLEC9/SYNGR1/ROCK1/TYROBP…	BP
contractile actin filament bundle assembly	68/7182	97/17910	1.99262e-09	5.2568e-08	3.93036e-08	68	S1PR1/ELN/DLC1/LPAR1/TGFB3/ARHGEF15/NRP1/PPM1F/CCN2/SH3PXD2B/EVL/SFRP1/PHLDB2/PIK3R1/ABL1/WASF2/SORBS1/NOX4/ZYX/ASAP3/SORBS3/ITGB5/ARHGAP6/GPR65/TACR1/PHACTR1/TGFBR1/TPM1/SRF/CORO2B/CLASP1/INPP5K/ARAP1/ARRB1/ROCK1/BBS4/ARHGEF10/LIMCH1/TAC1/RGCC/ARHGEF5/CLASP2/RAPGEF3/MYOC/ITGB1BP1/CARMIL1/PTGER4/TACSTD2/TNFAIP1/WAS/SLC9A1/STMN1/TESK1/FHDC1/RHOA/S100A10/RAC1/PAK1/TSC1/FHOD1/ROCK2/PXN/PPP1R9A/SRC/A…	BP
stress fiber assembly	68/7182	97/17910	1.99262e-09	5.2568e-08	3.93036e-08	68	S1PR1/ELN/DLC1/LPAR1/TGFB3/ARHGEF15/NRP1/PPM1F/CCN2/SH3PXD2B/EVL/SFRP1/PHLDB2/PIK3R1/ABL1/WASF2/SORBS1/NOX4/ZYX/ASAP3/SORBS3/ITGB5/ARHGAP6/GPR65/TACR1/PHACTR1/TGFBR1/TPM1/SRF/CORO2B/CLASP1/INPP5K/ARAP1/ARRB1/ROCK1/BBS4/ARHGEF10/LIMCH1/TAC1/RGCC/ARHGEF5/CLASP2/RAPGEF3/MYOC/ITGB1BP1/CARMIL1/PTGER4/TACSTD2/TNFAIP1/WAS/SLC9A1/STMN1/TESK1/FHDC1/RHOA/S100A10/RAC1/PAK1/TSC1/FHOD1/ROCK2/PXN/PPP1R9A/SRC/A…	BP
response to peptide	261/7182	491/17910	2.13356e-09	5.60455e-08	4.19036e-08	261	TEK/RAMP3/FBN1/RAB31/IGFBP5/BACE1/RHOQ/GLP2R/STAT5B/LEPROT/VIM/ADCY4/SESN3/MAP1B/CXCL12/SPARC/CDO1/NOD1/CCN2/ADCY9/GNAI2/GHR/LRP1/GAB1/FYN/ADCY5/TGFB1/RARRES2/EDNRB/PIK3R1/LDOC1/KLF11/HDAC5/PRKCB/ATP6V1G2/TGFBR3/VAMP2/FCGR2B/NLRP1/MMP2/IGF1/PRKACB/SORBS1/KLF10/PID1/KAT2B/MYO5A/FER/GNAI1/PLN/PRKAR2B/SOGA1/NGFR/PRKACA/ADRB2/ZFP36L1/KL/MBD5/BCL2L2/TIMP1/PIK3CA/VCAM1/GPR173/PRNP/CACNA2D1/TLR4/ITGA4/A…	BP
negative regulation of biosynthetic process	719/7182	1522/17910	2.13527e-09	5.60455e-08	4.19036e-08	719	ZEB2/MAPK10/HIC1/NR3C1/JAZF1/NR2F1/CD34/EMILIN1/TCF21/HEYL/POU6F1/BEND6/PRICKLE1/MDFIC/RUNX1T1/ZFPM2/ZNF423/DACT1/FOXN3/PTGIS/IGFBP5/DAB2/TCEAL7/ZBTB4/APBB1/AEBP1/NFATC4/MAF/GREM1/CYGB/EID1/AR/GLIS2/MEF2C/GLI3/ZEB1/PRRX1/WWTR1/GLI2/ZNF366/ACVRL1/LEPR/RBFOX2/WWC3/DKK3/ELK3/PDE2A/KANK2/KLF7/PPM1F/CBX7/FZD1/PKIG/MSC/BCL6B/PBXIP1/FOXF1/FOXS1/ATXN1/SKI/TWIST2/BMPR2/BEND5/PRMT2/FTO/CBX6/HCFC2/TLE4/NOTC…	BP
positive regulation of cell activation	180/7182	319/17910	2.14001e-09	5.60455e-08	4.19036e-08	180	IL6ST/PDGFRB/SELP/MEF2C/GLI3/GLI2/STAT5B/THY1/BCL2/TGFBR2/CCN2/GPR183/FYN/CD81/HLX/TGFB1/SOCS5/PIK3R1/GAS6/THBS1/LRRK2/CCL2/ZMIZ1/CD1D/IGF1/LGALS1/FGF10/IL33/ZBTB16/ITPKB/AXL/PIK3R6/CYLD/PIK3CA/CD4/VCAM1/CD28/TACR1/CCL19/AIF1/PDPN/NLRP3/GATA2/TLR4/BCL6/ITGAM/CD209/TESPA1/IL4R/NCKAP1L/MMP14/NFATC2/IL7R/VSIR/TREM2/PAK3/DOCK8/CCR2/TNFSF4/TNFSF14/HSPD1/TYROBP/CD83/CCR7/LILRB1/CAV1/NR4A3/GRAP2/EGR3/CD…	BP
in utero embryonic development	191/7182	342/17910	2.14953e-09	5.61584e-08	4.1988e-08	191	HEG1/PKD2/TIE1/EDNRA/ZFPM2/TGFB3/AR/GLI3/GLI2/RSPO3/ACVRL1/ANGPT1/CMTM3/FOXF1/VASH1/SOX17/MYH10/NRK/TGFBR2/PDGFRA/ADD1/EPAS1/SMO/PKD1/MBNL1/NR2F2/PCDH12/GNA12/FGFR1/ZMIZ1/SOX18/IGF1/ARNT/NCOA1/CCN1/MYH9/TMEM100/TCTN1/INPP5B/ITGB1/MGAT1/HAND2/RTN4/ZFP36L1/BMPR1A/TGFBR1/TPM1/SRF/NOS3/GATA2/CERT1/LPAR6/CCNB1/HEY2/ELF3/KIDINS220/KRT8/NECAB1/GJA1/GABPA/SPINT1/ASF1B/OVOL2/CCNB2/FLCN/GRHL2/PLK4/INPP5K/S…	BP
protein stabilization	107/7182	171/17910	2.15584e-09	5.61872e-08	4.20095e-08	107	CRTAP/CREBL2/PLPP3/ATP1B2/ANK2/SOX17/SMO/PRKN/PIK3R1/TMEM88/HIP1/CRYAB/PINK1/IGF1/RASSF2/FLNA/P3H1/RTN4/GPIHBP1/WDR81/AAK1/CAMLG/PTEN/BAG2/ATF7IP/CLU/MTMR9/CREB1/GNAQ/TAF9B/HSPD1/TYROBP/ATP1B1/IFT46/TRIM44/EPHA4/WIZ/USP2/USP27X/TBRG1/MORC3/CHP1/USP13/NOP53/PHB/TSPAN1/TBL1X/PIN1/PYHIN1/PIM1/SAV1/TAF1/PEX19/SMAD7/ZSWIM7/FLOT1/GTSE1/DVL3/HSP90AA1/ZBED3/MDM4/CCT8/CCT6A/PER3/FLOT2/USP19/CCT3/MARCHF7/M…	BP
cell-substrate adherens junction assembly	59/7182	81/17910	2.20791e-09	5.72676e-08	4.28174e-08	59	TEK/DLC1/GREM1/ACVRL1/THY1/NRP1/PPM1F/EPHA3/BCL2/FERMT2/PEAK1/LRP1/SFRP1/PHLDB2/ABL1/THBS1/FAM107A/MACF1/DUSP3/APOD/KDR/COL16A1/ACTN1/SORBS1/DAPK3/ARHGAP6/GPM6B/LDB1/DUSP22/PTEN/CORO1C/MMP14/CORO2B/CLASP1/ROCK1/LIMCH1/LIMS1/CLASP2/ACTN2/MYOC/ARHGEF7/MAP4K4/ITGB1BP1/TAOK2/LAMA5/PDPK1/WHAMM/SLC9A1/CAMSAP3/IQGAP1/EFNA5/RHOA/S100A10/RAC1/TSC1/ROCK2/SRC/RHOD/RCC2	BP
focal adhesion assembly	59/7182	81/17910	2.20791e-09	5.72676e-08	4.28174e-08	59	TEK/DLC1/GREM1/ACVRL1/THY1/NRP1/PPM1F/EPHA3/BCL2/FERMT2/PEAK1/LRP1/SFRP1/PHLDB2/ABL1/THBS1/FAM107A/MACF1/DUSP3/APOD/KDR/COL16A1/ACTN1/SORBS1/DAPK3/ARHGAP6/GPM6B/LDB1/DUSP22/PTEN/CORO1C/MMP14/CORO2B/CLASP1/ROCK1/LIMCH1/LIMS1/CLASP2/ACTN2/MYOC/ARHGEF7/MAP4K4/ITGB1BP1/TAOK2/LAMA5/PDPK1/WHAMM/SLC9A1/CAMSAP3/IQGAP1/EFNA5/RHOA/S100A10/RAC1/TSC1/ROCK2/SRC/RHOD/RCC2	BP
protein localization to nucleus	133/7182	223/17910	2.49622e-09	6.45903e-08	4.82923e-08	133	PRICKLE1/MDFIC/SYNE1/GLIS2/GLI3/ANGPT1/PKIG/DCLK2/FYN/SUN2/TOR1AIP1/SMO/ARL2BP/TXNIP/PYGO1/TGFB1/PIK3R1/SUFU/LRRK2/APOD/FLNA/ZBTB16/NGFR/RAB23/HYAL2/CDK1/COL1A1/PKIA/LZTS2/TXN/SIX2/HCLS1/FLCN/MBTPS1/DKC1/TRIM8/CD36/TSC2/OSBPL8/BBS4/PLK1/CDH1/NFKBIA/STAT3/SOX9/TBRG1/MORC3/CHP1/SKP1/DNAJB6/KPNA2/NOP53/DCLK1/GBP2/PIN1/ARNTL/PYHIN1/OTUD7B/CD2AP/ARL2/IPO13/ZC3H12A/CHCHD10/PIKFYVE/YWHAE/ECT2/PPP3CA/CBL…	BP
regulation of T cell activation	174/7182	307/17910	2.51105e-09	6.48187e-08	4.84631e-08	174	LRRC32/IL6ST/GLI3/ZEB1/GLI2/STAT5B/THY1/PDE5A/TGFBR2/GSN/FYN/CD81/HLX/TGFB1/TWSG1/LOXL3/SOCS5/PIK3R1/ABL1/FCGR2B/TNFSF8/CCL2/DUSP3/ZMIZ1/CD1D/IGF1/LGALS1/ZBTB16/ITPKB/GPNMB/PIK3R6/CYLD/DUSP22/PIK3CA/CD4/VCAM1/TMEM131L/CD28/CCL19/AIF1/PRNP/NLRP3/BCL6/DTX1/PRKAR1A/CD209/TESPA1/IL4R/NCKAP1L/NFATC2/IL7R/SOS1/CR1/VSIR/PAK3/DOCK8/CCR2/TNFSF4/VSIG4/TNFSF14/HSPD1/LMO1/CD83/CCR7/LILRB1/CAV1/GRAP2/EGR3/CD8…	BP
mesenchymal cell differentiation	121/7182	199/17910	2.53967e-09	6.54011e-08	4.88985e-08	121	ZEB2/PHLDB1/LDLRAD4/TCF21/HEYL/ENG/EDNRA/DAB2/TGFB3/FAM172A/GREM1/HGF/MEF2C/WWTR1/FRZB/NRP1/GLIPR2/EPHA3/BCL2/TGFBR2/TGFB1I1/SMO/TGFB1/EDNRB/SPRY1/SFRP1/PHLDB2/LOXL3/DACT3/SFRP2/NRP2/TGFBR3/FGFR1/RFLNB/ISL1/FGF10/TMEM100/HAND2/FBXL17/RTN4/OLFM1/FN1/BMPR1A/SNAI2/TGFBR1/VASN/PDPN/MCRIP1/COL1A1/HTR2B/PTEN/HEY2/CORO1C/OVOL2/SIX2/FOXF2/OSR1/TIAM1/CLASP1/NOG/DDX17/TWIST1/LEF1/EZH2/FOXC2/AKNA/SOX9/BCL9L…	BP
positive regulation of leukocyte activation	173/7182	305/17910	2.57676e-09	6.61982e-08	4.94945e-08	173	IL6ST/MEF2C/GLI3/GLI2/STAT5B/THY1/BCL2/TGFBR2/GPR183/FYN/CD81/HLX/TGFB1/SOCS5/PIK3R1/GAS6/THBS1/LRRK2/CCL2/ZMIZ1/CD1D/IGF1/LGALS1/FGF10/IL33/ZBTB16/ITPKB/AXL/PIK3R6/CYLD/PIK3CA/CD4/VCAM1/CD28/TACR1/CCL19/AIF1/NLRP3/GATA2/TLR4/BCL6/ITGAM/CD209/TESPA1/IL4R/NCKAP1L/MMP14/NFATC2/IL7R/VSIR/TREM2/PAK3/DOCK8/CCR2/TNFSF4/TNFSF14/HSPD1/TYROBP/CD83/CCR7/LILRB1/CAV1/NR4A3/GRAP2/EGR3/CD86/VAMP8/ZBTB1/TAC1/FG…	BP
leukocyte cell-cell adhesion	184/7182	328/17910	2.64506e-09	6.77914e-08	5.06856e-08	184	LRRC32/IL6ST/PECAM1/SELP/GLI3/GLI2/STAT5B/THY1/PDE5A/MSN/CXCL12/TGFBR2/FYN/CD81/HLX/TGFB1/TWSG1/LOXL3/SOCS5/PIK3R1/ETS1/CERCAM/FCGR2B/CCL2/DUSP3/ZMIZ1/CD1D/IGF1/LGALS1/ZBTB16/ITPKB/GPNMB/STK10/ITGB1/PIK3R6/CYLD/DUSP22/PIK3CA/CD4/VCAM1/TMEM131L/CD28/CCL19/AIF1/PRNP/NLRP3/SELPLG/BCL6/ITGA4/DTX1/PRKAR1A/CD209/TESPA1/IL4R/CX3CR1/NCKAP1L/ITGA5/IL7R/VSIR/EZR/PAK3/DOCK8/CCR2/SELE/TNFSF4/VSIG4/TNFSF14/RO…	BP
positive regulation of stress-activated protein kinase signaling cascade	99/7182	156/17910	2.86732e-09	7.33136e-08	5.48144e-08	99	ZEB2/MAP3K3/MAP3K12/MDFIC/FZD4/SH3RF3/ROR2/NRK/NOD1/CCN2/PJA2/FLT4/GDF6/FCGR2B/SASH1/RASSF2/SEMA4C/FZD8/FZD7/HAND2/CCL19/GADD45B/MAP3K20/ARL6IP5/TLR4/EDA2R/FGD2/PKN1/TIAM1/MAP3K21/TRAF4/CCR7/MAP3K6/EPHA4/MAP2K7/TAOK1/ARHGEF5/DUSP19/TRAF6/F2RL1/MAP3K2/SLAMF1/TLR6/MAP4K5/DVL2/ZC3H12A/CD40LG/HMGCR/TGFB2/MAP3K7/MAPK8IP1/MAP3K9/PLCB1/INAVA/DVL3/APP/TIRAP/SH3RF2/TNFRSF11A/TAOK2/SH3RF1/TNFSF11/MUL1/RIPK…	BP
negative regulation of macromolecule biosynthetic process	679/7182	1432/17910	2.95489e-09	7.53742e-08	5.63551e-08	679	ZEB2/MAPK10/HIC1/NR3C1/JAZF1/NR2F1/TCF21/HEYL/POU6F1/BEND6/PRICKLE1/MDFIC/RUNX1T1/ZFPM2/ZNF423/DACT1/FOXN3/IGFBP5/DAB2/TCEAL7/ZBTB4/APBB1/AEBP1/NFATC4/MAF/GREM1/EID1/AR/GLIS2/MEF2C/GLI3/ZEB1/PRRX1/WWTR1/GLI2/ZNF366/ACVRL1/RBFOX2/WWC3/DKK3/ELK3/PDE2A/KANK2/KLF7/PPM1F/CBX7/FZD1/PKIG/MSC/BCL6B/PBXIP1/FOXF1/FOXS1/ATXN1/SKI/TWIST2/BMPR2/BEND5/PRMT2/FTO/CBX6/HCFC2/TLE4/NOTCH3/ARID5A/WTIP/SFMBT2/EZH1/SM…	BP
organonitrogen compound catabolic process	544/7182	1123/17910	3.07186e-09	7.81731e-08	5.84478e-08	544	PDE1A/FBXL7/GGT5/DCN/TNFSF12/CPQ/GPC6/LUM/PRICKLE1/OMD/DACT1/SDC2/ARSB/DAB2/KCTD10/MAP1A/PRELP/TIMP3/ECSCR/WWTR1/OGN/RNF217/SPSB1/PDE2A/PDE5A/MSN/CTSK/BGN/PDE7B/HSPG2/SOX17/VCAN/CDO1/USP51/LRP1/ASPA/TGFB1I1/FYN/SMPD1/CD81/PKD1/FGF2/TGFB1/DYSF/SOCS5/SNX1/PRKN/KLHL20/RNF146/RNF122/AASS/GNA12/SUFU/PPM1K/LRRK2/RAB12/PINK1/P2RX7/AZIN2/SDC3/FBXL5/RNF11/ATP2B4/FLNA/IL33/PDE8B/FAP/MYLIP/CSPG4/OAZ2/USP11/…	BP
positive regulation of transport	464/7182	942/17910	3.19195e-09	8.10381e-08	6.05898e-08	464	CD34/RAMP3/PKD2/PDGFRB/SCN4B/VEGFC/C1QTNF2/RAB31/NLGN2/DAB2/APBB1/TGFB3/EHD2/GREM1/RHOQ/TRPC1/GLI3/STOM/CREBL2/CAMK1D/FEZ1/THY1/CLIP3/C4A/LEPROT/ATP1B2/TUB/MFGE8/ANGPT1/MSN/ANK2/BCL2/MAGI2/NLGN3/CSF1R/MYH10/APLNR/CXCL12/SHANK3/SGIP1/GNAI2/FRMD4A/LRP1/C1QTNF4/NPR1/FYN/CD81/F2R/SMO/SFRP4/MEF2A/SCN1B/KCTD7/TGFB1/C4B/EDNRB/RIPOR1/RAB8B/PRKN/PIK3R1/ABL1/GAS6/WLS/FXYD1/HIP1/LRRK2/ABCA1/PINK1/VAMP2/P2RX…	BP
regulation of vesicle-mediated transport	255/7182	480/17910	3.51339e-09	8.89894e-08	6.65348e-08	255	HTR2A/DLG4/PRKD1/RAB31/SYT11/DAB2/EHD2/BACE1/GREM1/CAMK1D/CLIP3/C4A/NRP1/TUB/MFGE8/ANGPT1/MSN/EPHA3/FOXF1/MAGI2/STON1/SGIP1/GNAI2/LRP1/SFRP4/TGFB1/RSPO1/DYSF/C4B/PRKN/ABL1/GAS6/GAS1/HIP1/LRRK2/PRKCB/PINK1/VAMP2/FCGR2B/CCL2/MCTP1/GRIK5/CACNB2/ITGB3/C3/ITSN1/RAB25/ITGAV/ARHGAP1/KCNB1/ANO6/RAPGEF1/NCS1/AXL/RDX/BVES/RAP1A/CHRM2/FES/CD14/RAB2B/VAMP4/MERTK/CCL19/SNX33/GATA2/PPP3CB/RUFY2/AAK1/ABL2/PRAM1…	BP
protein polymerization	137/7182	232/17910	3.59032e-09	9.07249e-08	6.78324e-08	137	ELN/KIRREL1/SLIT2/MAP7D3/CLIP3/NAV3/HDGFL3/MAP1B/MYADM/ADD1/GSN/FCHSD2/JMY/EVL/ANKRD53/TMOD2/PRKN/ABL1/TMOD1/FAM107A/PINK1/LMOD1/PREX1/FER/MECP2/RDX/ARHGAP6/PLEKHG2/TRIM6/FES/ARL6/NIN/AIF1/TOGARAM1/ABI2/STMN2/NCKAP1L/HCLS1/TRIOBP/CASQ2/MAPT/CLASP1/MAGEL2/MAP2/PAK3/CDKN1B/FHOD3/WASF1/CASQ1/ARPIN/DCTN1/SLAIN2/BBS4/PRKCE/WASHC2C/MYO1C/CCR7/UBE2C/NUMA1/SNX9/SPIRE1/DYRK1A/CLIP1/SNCA/WASF3/CLASP2/RASA1…	BP
morphogenesis of a branching epithelium	110/7182	178/17910	3.62384e-09	9.13579e-08	6.83056e-08	110	PKD2/SLIT2/TCF21/DCHS1/ENG/EDNRA/NFATC4/GREM1/AR/HGF/GLI3/FAT4/GLI2/FGF7/RSPO3/CLIC4/NRP1/RASIP1/FOXF1/BCL2/PBX1/TGFBR2/SMO/PKD1/NOTCH4/FGF2/TGFB1/FGF1/SPRY1/SFRP1/ABL1/SFRP2/WNT2B/PGR/FGFR1/CSF1/ILK/FGF10/SULF1/COL4A1/PLXND1/SNAI2/SRF/ESRP2/TNC/FEM1B/PGF/SPINT1/SIX2/MMP14/GRHL2/HOXA5/ST14/SOCS3/NOG/DLL4/PTCH1/FOXC2/SPINT2/SOX9/SOX10/RXRA/RSPO2/HHIP/SMAD4/TGM2/DLG5/SEMA3C/CCL11/YAP1/BTRC/ACVR1/AG…	BP
negative regulation of cell cycle	316/7182	613/17910	3.6446e-09	9.16671e-08	6.85368e-08	316	FBXL7/GAS7/TIMP2/PKD2/NPR2/DACT1/FOXN3/APBB1/PEA15/RPS6KA2/KANK2/NOTCH2/BCL2/MAGI2/VASH1/PRMT2/PHC1/JMY/LATS2/PKD1/TGFB1/NR2F2/CTDSP2/ABL1/GAS6/THBS1/GAS1/FAM107A/RRAGB/CCL2/SEPTIN7/ILK/FHL1/RHOB/PRKACB/FGF10/KAT2B/FAP/PPP2R5B/TSPYL2/GPNMB/ZWINT/DUSP1/NACC2/MYOCD/ZFHX3/ADCYAP1/PRKACA/ZFP36L1/WNT9A/FBXO31/CDK1/SIPA1/HECA/PRNP/TGFBR1/MAP3K20/TFDP2/PRKAG2/ING4/SETMAR/BCL6/PHC3/PTEN/CCNB1/ATM/RRAGA/H…	BP
muscle organ development	219/7182	403/17910	3.7026e-09	9.29096e-08	6.94658e-08	219	S1PR1/EVC/LAMA2/HEG1/DCN/ELN/GLI1/TCF21/HEYL/ENG/POU6F1/MRAS/ZFPM2/MEOX2/GREM1/MEF2C/SGCD/COL6A3/ADARB1/FZD1/MSC/BCL2/SKI/SOX17/TGFBR2/MEIS1/MEF2D/SGCE/SMO/HLX/MEF2A/FGF2/CDON/TGFB1/NR2F2/FHL3/ITGA7/SGCB/CRYAB/SGCA/TGFBR3/CACNA1H/UTRN/FGFR1/FHL1/TAGLN/MRTFB/ISL1/IGF1/COL3A1/FOXP2/PI16/DMD/SVIL/VAMP5/ASB2/JPH2/CCM2L/RGS4/EID2B/MYOCD/MAPK11/ARID5B/BVES/FZD7/ZFHX3/SPEG/KCNAB1/MYLK/RGS2/AKAP6/KCNK2/C…	BP
leukocyte chemotaxis	115/7182	188/17910	3.80961e-09	9.53728e-08	7.13074e-08	115	S1PR1/JAM3/SLIT2/VEGFC/GREM1/CAMK1D/CYP7B1/CH25H/THBS4/CXCL12/GPR183/ITGA9/RARRES2/DYSF/EDNRB/PIP5K1C/GAS6/THBS1/ITGA1/CCL2/CSF1/PTN/PREX1/ANO6/DUSP1/PDE4B/LYST/C3AR1/IL16/KIT/BST1/JAML/CCL19/AIF1/FLT1/PIK3CD/SWAP70/NCKAP1L/CXCR4/CCN3/PDE4D/CCR2/PDGFB/MPP1/TNFSF14/ZNF580/CCR7/CMKLR1/GPSM3/C5AR1/WNK1/RIPOR2/TAFA4/ARHGEF5/CXCL3/CCR1/CCR5/IL6R/F2RL1/DDT/CXADR/C1QBP/IL17RA/TGFB2/CCL11/ITGB2/HRH1/NBL1…	BP
morphogenesis of a branching structure	117/7182	192/17910	3.85567e-09	9.63025e-08	7.20026e-08	117	PKD2/SLIT2/TCF21/DCHS1/ENG/EDNRA/NFATC4/GREM1/AR/HGF/GLI3/FAT4/GLI2/FGF7/RSPO3/CLIC4/NRP1/RASIP1/FOXF1/BCL2/PBX1/TGFBR2/SMO/PKD1/NOTCH4/FGF2/TGFB1/FGF1/SPRY1/SFRP1/ABL1/SFRP2/WNT2B/PGR/LRRK2/FGFR1/CSF1/ILK/FGF10/SULF1/COL4A1/RTN4/PLXND1/SNAI2/SRF/ESRP2/TNC/FEM1B/PGF/SPINT1/SIX2/MMP14/GRHL2/HOXA5/ST14/SOCS3/NOG/DLL4/PTCH1/FOXC2/SPINT2/SOX9/SOX10/RXRA/RSPO2/EPHA7/HHIP/SMAD4/TGM2/DLG5/SEMA3C/CCL11/Y…	BP
endomembrane system organization	201/7182	365/17910	3.91088e-09	9.74559e-08	7.2865e-08	201	PLSCR4/PRKD1/SYNE1/SYT11/EHD2/AR/FAT4/DYNC2H1/ANK2/MYH10/TMEM43/GSN/SUN2/TOR1AIP1/F2R/ATL1/DYSF/COL5A1/PRKN/STX2/LRRK2/ABCA1/PRKCB/HOOK3/P2RX7/A4GALT/NEK9/EPB41L3/ABCD2/TRAM2/RBSN/SYPL2/MYH9/ANO6/DMPK/PDE4DIP/ATL3/RTN4/LYST/PLEKHM2/PAFAH1B1/CDK1/REEP1/CAVIN2/SERPINE2/VAMP4/REEP2/SNX33/RAB30/CERT1/F2RL3/PTEN/CCNB1/SYNJ1/PARP11/SH3GLB1/SNX19/CHMP4C/CORO1C/RAB29/HOOK1/CCNB2/CLU/PHETA2/RAB3GAP1/CXCR4…	BP
wound healing	287/7182	550/17910	4.0491e-09	1.00668e-07	7.52664e-08	287	A2M/DCN/CD34/PECAM1/ENTPD1/PDGFRB/ITPR1/SELP/SERPING1/CPQ/ZFPM2/TBXA2R/SYT11/FBLN1/TGFB3/EHD2/GLI3/PRKG1/ACVRL1/PEAR1/F8/MCAM/ELK3/VWF/MYH10/PHF21A/SPARC/TGFBR2/PDGFRA/GSN/TLN1/DOCK11/PRKCH/MMRN1/FYN/CD81/F2R/NOTCH4/ITGA9/FGF2/SMOC2/TGFB1/DYSF/COL5A1/PHLDB2/SH2B3/PIK3R1/PRCP/GAS6/ETS1/THBD/GNA12/PLAT/THBS1/PRKCB/SGCA/P2RX7/MACF1/ILK/APOD/PTN/IGF1/COL1A2/COL3A1/P2RY12/F2RL2/ITGB3/PRKACB/FGF10/FLNA…	BP
regulation of apoptotic signaling pathway	216/7182	397/17910	4.13042e-09	1.02453e-07	7.66014e-08	216	SEPTIN4/TNFSF12/NFATC4/TIMP3/AR/HGF/PEA15/NRP1/SRPX/BCL2/CXCL12/GNAI2/GSN/MEIS3/FYN/SFRP1/PRKN/SFRP2/THBS1/LRRK2/PINK1/FGFR1/IGF1/FGF10/DAPK3/ITGAV/NACC2/ACKR3/HYAL2/CYLD/SNAI2/TGFBR1/TFDP2/NOS3/WDR35/PTEN/MOAP1/PELI3/FEM1B/ITPRIP/SLC25A5/CFLAR/CX3CR1/CLU/FLCN/ZMYND11/PPP3CC/ATP5IF1/TRAF1/TAF9B/NOG/MAP2K5/ARHGEF2/CAV1/IL20RA/BIK/EEF1E1/NDUFS3/NUPR1/ARRB2/BDKRB2/SFN/MLLT11/YBX3/SIRT1/PRR7/INHBA/SN…	BP
negative regulation of cell proliferation	378/7182	751/17910	4.39138e-09	1.08677e-07	8.12543e-08	378	IGFBP7/PLPP1/NDN/PODN/TIMP2/LRRC32/TNS2/PTPRM/PKD2/PTGIR/PMP22/CYP1B1/DLC1/CD200/FBLN1/SERPINF1/IGFBP5/TGFB3/CDH5/GREM1/MCC/AR/SLIT3/MEF2C/GLI3/ZEB1/PRKG1/OGN/ACVRL1/FRZB/RPS6KA2/RERG/ADARB1/KANK2/PDE5A/ROR2/SRPX/P3H3/KLF9/BCL2/MAGI2/VASH1/ROBO1/SKI/CSF1R/BMPR2/SPARC/NRK/TGFBR2/MEIS1/NPR1/TGFB1I1/F2R/SFRP4/ADAMTS1/TGFB1/NR2F2/TWSG1/SPRY1/SFRP1/SH2B3/SFRP2/PTH1R/ETS1/VIPR2/LDOC1/THBS1/KLF11/LIMS2/…	BP
positive regulation of neuron differentiation	196/7182	355/17910	4.62207e-09	1.14124e-07	8.5327e-08	196	ZEB2/TCF4/TIMP2/SLIT2/HEYL/DLG4/BEND6/PRKD1/SERPINF1/FZD4/ARSB/LPAR1/APBB1/HGF/MEF2C/ZEB1/ISLR2/GLI2/CAMK1D/FEZ1/NRP1/DPYSL3/FZD1/EPHA3/BCL2/MAGI2/ROBO1/MAP1B/CXCL12/SHANK3/BMPR2/NEGR1/LRP1/FYN/GDF6/SCN1B/CDON/NAP1L2/PRKN/FGFR1/MACF1/ILK/CRTC1/PTN/NGF/ITSN1/CREB3L2/NTN1/NCOA1/SCARF1/P3H1/PPP2R5B/RAPGEF1/NME1/MEGF8/RARB/MOB2/NGFR/TRPC6/ADCYAP1/RAP1A/RGS2/AMIGO1/FBXO31/FES/FN1/PAFAH1B1/NIN/SRF/GATA…	BP
maintenance of location	163/7182	286/17910	4.63754e-09	1.14244e-07	8.54171e-08	163	CLIC2/PKD2/LTBP1/FBN1/ITPR1/HTR2A/SYNE1/TRPC1/STAT5B/THY1/DZIP1/ANK2/APLNR/GSN/FTO/TLN1/SUN2/F2R/ARL2BP/PKD1/FGF2/TGFB1/DYSF/ABL1/NRROS/ABCA1/PINK1/P2RX7/GRIK5/RASA3/SLC8A1/ITGB3/EPB41L3/CACNA1C/DMD/FLNA/C3/ITGAV/MYO5A/ACACB/JPH2/PLN/UVRAG/SYNE3/PRKACA/AKAP6/CD4/PAFAH1B1/CCL19/ATP1A2/F2RL3/HTR2B/BDKRB1/MSR1/GSTM2/TXN/TPCN1/CASQ2/CD36/SELENON/ERO1A/EZR/TSPO/PDE4D/NR1H2/PLCG1/OSBPL8/CASQ1/SLC30A4/B…	BP
inositol lipid-mediated signaling	102/7182	163/17910	5.05826e-09	1.24325e-07	9.29541e-08	102	TEK/DCN/PREX2/PDGFRB/SELP/HTR2A/HGF/PEAR1/ANGPT1/CSF1R/PIP4K2A/PDGFRA/GSN/GAB1/FYN/F2R/PIK3IP1/PIP5K1C/PIK3R1/FGFR1/KDR/NGF/IGF1/TNFAIP8L3/DIPK2A/PPP2R5B/NCS1/PIK3R5/ZFP36L1/PPP1R16B/KIT/PIK3CA/CD28/SERPINE2/FLT1/HTR2B/PTEN/PIK3CD/INPP5F/PTPN13/HCLS1/TSC2/NEDD4/EZR/PITPNM2/PDGFB/CEP55/SIRT2/TWIST1/PIP4K2B/FBXL2/HCST/PLD2/SOX9/PIP5K1B/IRS1/FGR/SIRT1/NLRC3/NOP53/GATA3/NPR3/F2RL1/CAT/C1QBP/ERBB3/MYO…	BP
peptidyl-tyrosine modification	193/7182	349/17910	5.10162e-09	1.25106e-07	9.35378e-08	193	TEK/IL6ST/PECAM1/PDGFRB/HTR2A/DLG4/TIE1/DDR2/GREM1/EFEMP1/HGF/FGF7/THY1/NRP1/ANGPT1/ROR2/EPHA3/THBS4/CSF1R/PDGFRA/FLT4/PEAK1/GHR/FYN/CD81/ARL2BP/TGFB1/SFRP1/SH2B3/SOCS5/ABL1/SFRP2/PDGFC/GAS6/FGFR1/ROR1/KDR/ISL1/IGF1/TPST1/ITGB3/FGF10/NOX4/NEK1/FER/DSTYK/PPP2R5B/CSPG4/AXL/PDGFD/TAL1/HYAL2/FES/DUSP22/KIT/CD4/BST1/MERTK/PRNP/FLT1/JAK1/ABL2/ABI2/MATK/INPP5F/CLK4/HCLS1/SHC1/ITGA5/CD36/ENPP2/MELK/MST1R…	BP
mitotic nuclear division	139/7182	237/17910	5.15087e-09	1.26027e-07	9.42267e-08	139	PDGFRB/TGFB1/ANKRD53/KLHDC8B/IGF1/CCDC8/FLNA/MAP9/DAPK3/ZWINT/DUSP1/CD28/CCNB1/ATM/HECW2/MAD2L1/CDCA8/CHMP4C/NFE2L1/NCAPG/MAU2/CLASP1/CDC20/DLGAP5/CDKN1B/PDGFB/APC/PLK1/RCC1/AURKB/SIRT2/ANLN/CDC25C/SIRT7/KIF2C/PKMYT1/UBE2C/NUMA1/ARHGEF10/NCAPH/KIF14/BUB1B/NUSAP1/CDT1/KIF11/KNSTRN/SGO1/KIF4A/PPP1R9B/RGCC/MKI67/TOM1L2/TTK/ATRX/KLHL22/CDCA5/POGZ/SPAG5/TRIP13/NEK2/KIF18A/KIF23/ESPL1/TPX2/CLASP2/INSR/…	BP
positive regulation of cytoskeleton organization	123/7182	205/17910	5.92164e-09	1.44558e-07	1.08082e-07	123	TEK/KIRREL1/LPAR1/TGFB3/ARHGEF15/NRP1/NAV3/PPM1F/MAP1B/CCN2/GSN/FCHSD2/SH3PXD2B/JMY/EVL/SFRP1/ANKRD53/ABL1/P2RX7/LMOD1/NOX4/FLNA/FER/MECP2/SORBS3/CEP120/GPR65/FES/POC1A/NIN/TACR1/CFL2/TGFBR1/TPM1/TOGARAM1/ABI2/DSTN/STMN2/SWAP70/NES/NCKAP1L/HCLS1/PLK4/MAPT/CLASP1/MAGEL2/CDKN1B/WASF1/ARPIN/DCTN1/SLAIN2/PRKCE/WASHC2C/MYO1C/CCR7/ID1/NUMA1/ARHGEF10/SNX9/LIMCH1/DYNC1H1/TAC1/SPIRE1/RGCC/CLIP1/ARHGEF5/SE…	BP
leukocyte degranulation	278/7182	532/17910	5.93655e-09	1.44595e-07	1.08109e-07	278	TIMP2/PECAM1/RAB31/CRISPLD2/ARSB/PLEKHO2/STOM/CD93/FOXF1/CYB5R3/STING1/ATP8B4/PTPRB/GSN/AP1M1/VPS35L/PRCP/YPEL5/VAMP2/FCGR2B/C3/LAIR1/FGL2/DEGS1/VCL/ITGAV/MILR1/ANO6/NFASC/RAB9B/STK10/RAP1A/GLIPR1/FES/C3AR1/KIT/CD14/BST1/VAT1/METTL7A/GYG1/GATA2/HGSNAT/GMFG/PRSS3/PRAM1/ITGAM/PIK3CD/MAN2B1/IL4R/CD84/ADA2/NCKAP1L/CD36/FCN1/HVCN1/CR1/CFP/FCGR2A/TUBB4B/CCR2/PPIA/SIRPA/SIGLEC9/SYNGR1/ROCK1/TYROBP/BIN2/…	BP
positive regulation of cellular protein localization	178/7182	318/17910	5.97391e-09	1.45177e-07	1.08544e-07	178	RAMP3/SYT11/MAP1A/GLIS2/GLI3/STOM/CLIP3/LEPROT/MSN/EPHA3/BCL2/LRP1/PRKCH/FYN/CD81/SMO/TGFB1/RIPOR1/PRKN/PIK3R1/GAS6/PINK1/VAMP2/PTN/SSH1/SORBS1/FLNA/GNAI1/KCNB1/OAZ2/RDX/ITGB1/NGFR/RTN4/PRKACA/EPB41L2/HYAL2/CYLD/CDK1/CNPY4/PRNP/SNX33/TFDP2/RUFY3/CROCC/ITGAM/CCDC88A/NPTN/SH3GLB1/ARHGEF16/CNST/RAB29/HCLS1/DKC1/TRIM8/ABHD17C/MAPT/EZR/PPP3CC/PPM1A/TREM2/APC/TYROBP/PLK1/PRKCE/CDH1/MYO1C/NUMA1/GNL3/CEP…	BP
regulation of cell morphogenesis involved in differentiation	150/7182	260/17910	6.18418e-09	1.49949e-07	1.12113e-07	150	ZEB2/SLIT2/SDC2/FBLN1/SPART/LZTS1/NFATC4/ISLR2/THY1/NRP1/NLGN3/ROBO1/MAP1B/CXCL12/SHANK3/BMPR2/MYADM/LRP1/SEMA3G/TRAK2/ABL1/PLXNA4/DPYSL2/LRRK2/SYNGAP1/MACF1/ILK/NGF/ULK2/PREX1/FLNA/SARM1/NTN1/MEGF8/NGFR/TRPC6/RTN4/AMIGO1/OLFM1/FBXO31/FN1/PAFAH1B1/NIN/CHN1/CHRNA3/PDPN/SRF/RUFY3/PTPRS/ABI2/PTEN/BRSK1/CORO1C/ADGRB3/DOCK1/TRIOBP/TIAM1/MYCBP2/NEDD4/MAPT/MAP2/PDLIM5/CASS4/PAK3/BHLHB9/DBN1/WASHC2C/ID1/…	BP
embryonic morphogenesis	293/7182	565/17910	6.29545e-09	1.52254e-07	1.13836e-07	293	RECK/ZEB2/PHLDB1/COL8A1/PKD2/GLI1/FBN1/VEGFC/TCF21/ENG/PRICKLE1/DACT1/DLC1/TGFB3/GREM1/EFEMP1/AR/MEF2C/GLI3/ZEB1/PRRX1/GLI2/RSPO3/FRZB/TENM4/MAFB/DYNC2H1/CC2D2A/COL4A2/ROR2/FZD1/FOXF1/PBX1/SKI/SOX17/APLNR/BMPR2/MYADM/TGFBR2/PDGFRA/GJA5/TGFB1I1/SOBP/SMO/HLX/ALDH1A3/FGF2/MBNL1/CDON/TGFB1/TWSG1/ITGA7/COL5A1/SFRP1/PHLDB2/ABL1/SFRP2/WLS/COL6A1/WNT2B/GNA12/SUFU/LAMB1/FGFR1/MMP2/SOX18/SEMA4C/TSHZ1/ITGB3…	BP
positive regulation of lymphocyte activation	149/7182	258/17910	6.30747e-09	1.52254e-07	1.13836e-07	149	IL6ST/MEF2C/GLI3/GLI2/STAT5B/THY1/BCL2/TGFBR2/GPR183/FYN/CD81/HLX/TGFB1/SOCS5/PIK3R1/GAS6/CCL2/ZMIZ1/CD1D/IGF1/LGALS1/FGF10/ZBTB16/ITPKB/AXL/PIK3R6/CYLD/PIK3CA/CD4/VCAM1/CD28/TACR1/CCL19/AIF1/NLRP3/TLR4/BCL6/CD209/TESPA1/IL4R/NCKAP1L/MMP14/NFATC2/IL7R/VSIR/PAK3/DOCK8/CCR2/TNFSF4/TNFSF14/HSPD1/TYROBP/CD83/CCR7/LILRB1/CAV1/GRAP2/EGR3/CD86/ZBTB1/TAC1/ATP11C/EFNB3/LILRB2/PDCD1LG2/GATA3/CD276/TRAF6/BT…	BP
response to hypoxia	195/7182	354/17910	6.44861e-09	1.55314e-07	1.16124e-07	195	TEK/CD34/ITPR1/RAMP2/EDNRA/PTGIS/TGFB3/SOD3/CYGB/RORA/ACVRL1/BCL2/CXCL12/TGFBR2/EPAS1/WTIP/TGFB1/SFRP1/ETS1/PLAT/THBS1/CRYAB/PINK1/TGFBR3/COX4I2/PTN/ARNT/SLC8A1/PAM/KCNMA1/NOX4/MECP2/CITED2/CREBBP/KCNMB1/MYOCD/TRPC6/ZFP36L1/AQP1/KCNK2/VCAM1/VASN/SRF/PTEN/CCNB1/ATM/PLOD2/CCNA2/CFLAR/SLC2A4/MMP14/CBFA2T3/APOLD1/CXCR4/CREB1/ERO1A/S100B/CDKN1B/KCNK3/ADORA1/KCNA5/ATP1B1/PRKCE/SIRT2/TWIST1/RYR2/CAV1/PS…	BP
ossification	211/7182	388/17910	6.57505e-09	1.58006e-07	1.18137e-07	211	TEK/S1PR1/MGP/IL6ST/GLI1/CDH11/DCHS1/NPR2/PRKD1/DDR2/OMD/IGFBP5/DHH/THBS3/TGFB3/GREM1/HGF/MEF2C/GLI3/WWTR1/FAT4/GLI2/FAM20C/MRC2/MN1/TMEM119/ASPN/ROR2/CTSK/FZD1/BCL2/PBX1/SKI/TWIST2/VCAN/BMPR2/SPARC/CCN2/MEF2D/CHRDL1/SH3PXD2B/SMO/TGFB1/TWSG1/SFRP1/SFRP2/PTH1R/COL6A1/SUFU/P2RX7/CSF1/ILK/MMP2/PTN/CHRDL2/IGF1/COL1A2/HDAC7/RASSF2/SLC8A1/KLF10/PDLIM7/ZHX3/ZBTB16/CCN1/ANO6/GPNMB/GPM6B/HAND2/PRKACA/ADRB…	BP
central nervous system development	459/7182	935/17910	6.79281e-09	1.62876e-07	1.21778e-07	459	ZEB2/SEPTIN4/ADGRA2/S1PR1/NDN/TIMP2/CNTN4/IL6ST/PKD2/GNB4/AKT3/SLIT2/GLI1/CDH11/ENG/POU6F1/DLC1/PCDH18/FZD4/ARSB/LPAR1/PLXDC1/GLI3/ZEB1/FAT4/GLI2/PRKG1/FEZ1/DAAM2/RORA/LHX6/RBFOX2/NRP1/EML1/TENM4/ADARB1/MAFB/CNTNAP1/VIM/DYNC2H1/ROR2/FZD1/BCL2/IL34/TTBK2/NLGN3/ROBO1/ATXN1/HSPG2/SKI/CSF1R/MYH10/CXCL12/SHANK3/BMPR2/TGFBR2/PBX3/LAMB2/GSN/NOTCH3/LRP1/NUMBL/GNAO1/BMERB1/DCLK2/ASPA/EZH1/FYN/SUN2/SMO/ALD…	BP
head development	371/7182	738/17910	7.33424e-09	1.75469e-07	1.31193e-07	371	ZEB2/SEPTIN4/S1PR1/CNTN4/GNB4/AKT3/SLIT2/GLI1/POU6F1/EDNRA/DLC1/CRISPLD2/PCDH18/FZD4/LPAR1/TGFB3/CRISPLD1/GLI3/FAT4/GLI2/PRKG1/FEZ1/RORA/LHX6/RBFOX2/NRP1/EML1/MAFB/DYNC2H1/FZD1/BCL2/TTBK2/ROBO1/ATXN1/HSPG2/SKI/CSF1R/MYH10/CXCL12/SHANK3/BMPR2/TGFBR2/PDGFRA/NOTCH3/LRP1/NUMBL/GNAO1/BMERB1/DCLK2/EZH1/FYN/SUN2/SMO/ALDH1A3/CDON/TGFB1/NR2F2/TWSG1/MDGA1/SFRP1/SHROOM4/ABL1/PLXNA4/SFRP2/DPYSL2/NRP2/ETS1/WL…	BP
phosphatidylinositol-mediated signaling	100/7182	160/17910	7.82915e-09	1.86895e-07	1.39736e-07	100	TEK/DCN/PREX2/PDGFRB/SELP/HTR2A/HGF/PEAR1/ANGPT1/CSF1R/PIP4K2A/PDGFRA/GSN/GAB1/FYN/F2R/PIK3IP1/PIP5K1C/PIK3R1/FGFR1/KDR/NGF/IGF1/DIPK2A/PPP2R5B/NCS1/PIK3R5/ZFP36L1/PPP1R16B/KIT/PIK3CA/CD28/SERPINE2/FLT1/HTR2B/PTEN/PIK3CD/INPP5F/PTPN13/HCLS1/TSC2/NEDD4/EZR/PITPNM2/PDGFB/CEP55/SIRT2/TWIST1/PIP4K2B/FBXL2/HCST/SOX9/PIP5K1B/IRS1/FGR/SIRT1/NLRC3/NOP53/GATA3/NPR3/F2RL1/CAT/C1QBP/ERBB3/MYOC/TGFB2/AGT/SLC…	BP
myeloid cell activation involved in immune response	282/7182	542/17910	8.0159e-09	1.90931e-07	1.42753e-07	282	TIMP2/PECAM1/RAB31/CRISPLD2/ARSB/PLEKHO2/STOM/CD93/FOXF1/CYB5R3/STING1/ATP8B4/PTPRB/GSN/DYSF/AP1M1/VPS35L/PRCP/YPEL5/VAMP2/C3/LAIR1/FGL2/IL33/DEGS1/VCL/ITGAV/FER/MILR1/ANO6/NFASC/RAB9B/STK10/RAP1A/GLIPR1/FES/C3AR1/KIT/CD14/BST1/VAT1/METTL7A/GYG1/GATA2/HGSNAT/GMFG/PRSS3/PRAM1/ITGAM/PIK3CD/MAN2B1/IL4R/CD84/ADA2/NCKAP1L/CD36/FCN1/HVCN1/CR1/CFP/FCGR2A/TUBB4B/CCR2/PPIA/SIRPA/SIGLEC9/SYNGR1/ROCK1/TYROB…	BP
regulation of protein polymerization	110/7182	180/17910	8.90951e-09	2.11748e-07	1.58318e-07	110	ELN/KIRREL1/SLIT2/CLIP3/NAV3/MAP1B/MYADM/ADD1/GSN/FCHSD2/JMY/EVL/ANKRD53/TMOD2/ABL1/TMOD1/PINK1/LMOD1/PREX1/FER/MECP2/RDX/PLEKHG2/FES/NIN/TOGARAM1/ABI2/STMN2/NCKAP1L/HCLS1/TRIOBP/MAPT/CLASP1/MAGEL2/MAP2/PAK3/CDKN1B/FHOD3/WASF1/ARPIN/DCTN1/SLAIN2/BBS4/PRKCE/WASHC2C/MYO1C/CCR7/NUMA1/SNX9/SPIRE1/DYRK1A/CLIP1/SNCA/RASA1/CAMSAP2/SPIRE2/HCK/ARL2/FKBP4/CCL11/BRK1/KANK1/LATS1/HSP90AA1/SPTAN1/PICK1/NCK1/C…	BP
epithelium development	597/7182	1251/17910	8.95481e-09	2.12357e-07	1.58773e-07	597	ZEB2/S1PR1/HEG1/CD34/PECAM1/PKD2/SLIT2/GLI1/VEGFC/TCF21/HEYL/DCHS1/ENG/GPC6/PRICKLE1/EDNRA/MEOX2/DACT1/DLC1/FZD4/LDB2/IGFBP5/DAB2/S1PR3/CDH5/NFATC4/GREM1/MEOX1/AR/HGF/MEF2C/GLI3/ZEB1/WWTR1/FAT4/GLI2/FAM20C/FGF7/STAT5B/RSPO3/CLIC4/GJA4/ACVRL1/FRZB/NRP1/CYP7B1/PDE2A/KANK2/KLF7/RASIP1/VIM/CC2D2A/MSN/ROR2/CTSK/RILPL1/FZD1/ANKRD6/CNN3/FOXF1/BCL2/MAGI2/PBX1/ROBO1/SKI/CSF1R/SOX17/BMPR2/MYADM/TGFBR2/ADD1…	BP
negative regulation of cellular macromolecule biosynthetic process	637/7182	1343/17910	9.0162e-09	2.13344e-07	1.59511e-07	637	ZEB2/MAPK10/HIC1/NR3C1/JAZF1/NR2F1/TCF21/HEYL/POU6F1/PRICKLE1/MDFIC/RUNX1T1/ZFPM2/ZNF423/DACT1/FOXN3/IGFBP5/DAB2/TCEAL7/ZBTB4/APBB1/AEBP1/NFATC4/MAF/GREM1/EID1/AR/GLIS2/MEF2C/GLI3/ZEB1/PRRX1/WWTR1/GLI2/ZNF366/ACVRL1/RBFOX2/WWC3/DKK3/ELK3/PDE2A/KANK2/KLF7/PPM1F/CBX7/FZD1/PKIG/MSC/BCL6B/PBXIP1/FOXF1/FOXS1/ATXN1/SKI/TWIST2/BMPR2/BEND5/PRMT2/FTO/CBX6/HCFC2/TLE4/NOTCH3/ARID5A/EZH1/SMO/MEF2A/TXNIP/NOTC…	BP
regulation of binding	201/7182	368/17910	9.41792e-09	2.22362e-07	1.66253e-07	201	CLIC2/PLCL1/DACT1/SPON1/DAB2/NFATC4/MEF2C/NRP1/ANGPT1/DZIP1/BCL2/TTBK2/STING1/SKI/ADD1/SMARCD3/LRP1/SMO/PKD1/CDON/TGFB1/PRKN/ABL1/LDOC1/HDAC5/LRRK2/TGFBR3/EBF2/CRMP1/NGF/ISL1/IGF1/GREM2/PLN/CCM2L/NME1/LARP6/MYOCD/HAND2/PRKACA/ADRB2/TRIM6/PLXND1/CYLD/CRBN/ZFP90/TGFBR1/LOX/ITGA4/CRTAC1/HEY2/CCPG1/NES/PLCL2/BAG2/TXN/AIDA/TIAM1/CD36/MAU2/HJURP/MAP2/AKTIP/IFI16/MFNG/PDGFB/NOG/GPSM1/ARRB1/ROCK1/PLK1/ZN…	BP
positive regulation of cell-cell adhesion	145/7182	251/17910	9.7661e-09	2.30079e-07	1.72023e-07	145	IL6ST/GLI3/GLI2/PLPP3/STAT5B/THY1/TGFBR2/FYN/CD81/HLX/ADAM19/TGFB1/SOCS5/PIK3R1/ETS1/CCL2/ZMIZ1/CD1D/IGF1/LGALS1/ZBTB16/CITED2/ITPKB/PIK3R6/CYLD/PIK3CA/CD4/VCAM1/CD28/CCL19/AIF1/PDPN/NLRP3/BCL6/ITGA4/CD209/TESPA1/IL4R/NCKAP1L/PODXL/IL7R/DENND6A/VSIR/PAK3/DOCK8/CCR2/TNFSF4/TNFSF14/HSPD1/CD83/CCR7/LILRB1/CAV1/NR4A3/GRAP2/EGR3/CD86/ZBTB1/FSTL3/EFNB3/KIFAP3/LILRB2/PDCD1LG2/GATA3/CD276/TRAF6/CD6/CD40L…	BP
negative regulation of cellular biosynthetic process	704/7182	1499/17910	1.07502e-08	2.52315e-07	1.88648e-07	704	ZEB2/MAPK10/HIC1/NR3C1/JAZF1/NR2F1/CD34/TCF21/HEYL/POU6F1/BEND6/PRICKLE1/MDFIC/RUNX1T1/ZFPM2/ZNF423/DACT1/FOXN3/PTGIS/IGFBP5/DAB2/TCEAL7/ZBTB4/APBB1/AEBP1/NFATC4/MAF/GREM1/EID1/AR/GLIS2/MEF2C/GLI3/ZEB1/PRRX1/WWTR1/GLI2/ZNF366/ACVRL1/LEPR/RBFOX2/WWC3/DKK3/ELK3/PDE2A/KANK2/KLF7/PPM1F/CBX7/FZD1/PKIG/MSC/BCL6B/PBXIP1/FOXF1/FOXS1/ATXN1/SKI/TWIST2/BMPR2/BEND5/PRMT2/FTO/CBX6/HCFC2/TLE4/NOTCH3/ARID5A/WTI…	BP
regulation of protein complex assembly	220/7182	409/17910	1.07567e-08	2.52315e-07	1.88648e-07	220	ELN/LDLRAD4/KIRREL1/SLIT2/SELP/DACT1/CLIP3/NAV3/RASIP1/MSN/MAP1B/TRABD2B/MYADM/ADD1/GSN/FCHSD2/JMY/TGFB1/EVL/ANKRD53/MITF/TMOD2/ABL1/TMOD1/CRYAB/ABCA1/PINK1/P2RY12/LMOD1/PREX1/FER/MECP2/PPP2R5B/RDX/PLEKHG2/TAL1/FES/CRBN/NIN/SRF/TLR4/TOGARAM1/ABI2/ATM/HEY2/STMN2/SH3GLB1/LCAT/ATF7IP/NCKAP1L/CLU/HCLS1/TRIOBP/BBS10/SEPTIN8/CD36/MAPT/CLASP1/MAGEL2/CREB1/HJURP/MAP2/PPM1A/PAK3/RPA3/CDKN1B/FHOD3/WASF1/AR…	BP
regulation of Wnt signaling pathway	188/7182	341/17910	1.09918e-08	2.57271e-07	1.92354e-07	188	RECK/ZEB2/RBMS3/ADGRA2/HIC1/BICC1/GLI1/PRICKLE1/MDFIC/DACT1/DAB2/NFATC4/GREM1/MCC/GLI3/IGFBP4/WWTR1/PLPP3/RSPO3/DAAM2/FRZB/DKK3/ROR2/FZD1/ANKRD6/SKI/SOX17/TRABD2B/LRP1/SFRP4/LATS2/CMAHP/RSPO1/SFRP1/PRKN/ABL1/DACT3/SFRP2/RNF146/TCF7L1/WLS/TMEM88/LRRK2/DIXDC1/NXN/MACF1/ILK/ISL1/FGF10/TMEM170B/DAPK3/BARX1/SULF1/RAPGEF1/FZD7/CYLD/TMEM131L/IGFBP6/SNAI2/CCN4/TNN/COL1A1/FOXO1/LZTS2/NFATC1/SPIN1/TIAM1/GS…	BP
organic substance transport	1095/7182	2416/17910	1.19638e-08	2.79413e-07	2.08909e-07	1095	QKI/MAPK10/LRRC32/CD34/RAMP3/RFTN2/ITPR1/VEGFC/HTR2A/COPZ2/C1QTNF2/RAMP2/PRICKLE1/MDFIC/EDNRA/CAVIN1/LTBP2/RAB31/CD200/NLGN2/SYT11/FZD4/DAB2/APBB1/TGFB3/MAP1A/SSC5D/RHOQ/GLI3/STOM/CREBL2/PEA15/LRRC8C/CLIP3/SYNDIG1/SLC45A1/LEPROT/KLF7/ANGPT1/PPM1F/RAB3IL1/ANK2/RILPL1/SLCO2A1/PKIG/CSF1R/MYH10/CXCL12/TGFBR2/NEURL1B/GJA5/LTBP4/FRMD4A/LRP1/C1QTNF4/NISCH/NACAD/FCHSD2/SELENOM/FYN/CD81/F2R/SMO/DENND2A/AR…	BP
cell-cell junction organization	83/7182	128/17910	1.24584e-08	2.90338e-07	2.17077e-07	83	HEG1/RAMP2/NLGN2/TGFB3/CDH5/GJA4/CNTNAP1/ANK2/CSF1R/GJA5/GPBAR1/TLN1/PRKCH/F2R/TGFB1/GJC1/LIMS2/HDAC7/EPB41L3/VCL/NFASC/CLDN5/PRKACA/PKP3/SNAI2/TGFBR1/SRF/GJA1/FLCN/GRHL2/DSG2/APC/F11R/ROCK1/CRB3/PARD6G/MYO1C/UGT8/CAV1/SDK1/DSP/TJP1/SNAI1/NLGN4X/F2RL1/CXADR/ARL2/DLG5/TGFB2/ECT2/PARD6B/AGT/POF1B/PATJ/MARVELD3/LSR/PKP2/CCM2/MARVELD2/EPHA2/WHRN/GRHL1/IKBKB/RUNX1/MPP7/GJB1/PRKCA/PLEKHA7/CAMSAP3/FZD5/…	BP
regulation of epithelial cell proliferation	201/7182	369/17910	1.25413e-08	2.9164e-07	2.18051e-07	201	TEK/PTPRM/AKT3/GLI1/TNFSF12/PRKD1/SERPINF1/MCC/AR/MEF2C/FGF7/ACVRL1/NRP1/CYP7B1/NOTCH2/KLF9/VASH1/ROBO1/THBS4/APLNR/CXCL12/BMPR2/SPARC/FLT4/SMO/FGF2/TGFB1/NR2F2/FGF1/DYSF/EDNRB/SFRP1/SFRP2/NRP2/THBS1/PGR/LAMB1/LIMS2/HTRA1/TGFBR3/FGFR1/CCL2/TINF2/PTN/KDR/ISL1/IGF1/ARNT/ITGB3/FOXP2/FGF10/ATOH8/SULF1/LAMC1/NFIB/NME1/KDF1/NGFR/FZD7/RTN4/ZFP36L1/PPP1R16B/WFDC1/TACR1/JAML/BMPR1A/SNAI2/TGFBR1/FLT1/ESRP2…	BP
extrinsic apoptotic signaling pathway	126/7182	213/17910	1.29911e-08	3.0145e-07	2.25386e-07	126	TNFSF12/TIMP3/AR/HGF/PEA15/NRP1/SRPX/BCL2/FYN/TGFB1/SFRP1/PIK3R1/SFRP2/THBS1/P2RX7/FGFR1/NGF/IGF1/FGF10/DAPK3/IL33/ITGAV/HYAL2/CYLD/SNAI2/TGFBR1/NOS3/PTEN/MOAP1/PELI3/FEM1B/KRT18/BEX3/ITPRIP/KRT8/CFLAR/ZMYND11/RNF41/TRAF1/MAP2K5/ARHGEF2/TNFRSF1A/CAV1/SGPP1/MLLT11/DELE1/INHBA/TNFAIP3/HMGB2/IL6R/GABARAP/FOXO3/IFI27/MAPK7/ERBB3/PTPRC/TGFB2/TNFRSF1B/MCL1/YAP1/PDIA3/ACVR1/AGT/BMPR1B/PMAIP1/FAIM2/WWOX/…	BP
macromolecule catabolic process	585/7182	1226/17910	1.30658e-08	3.02532e-07	2.26194e-07	585	FBXL7/DCN/TNFSF12/GPC6/LUM/PRICKLE1/OMD/DACT1/SDC2/ARSB/DAB2/KCTD10/MAP1A/PRELP/TIMP3/ECSCR/WWTR1/GPRASP1/OGN/RNF217/SPSB1/VIM/MSN/CTSK/BGN/HSPG2/SOX17/VCAN/USP51/FTO/LRP1/TGFB1I1/FYN/CD81/PKD1/FGF2/TGFB1/DYSF/SOCS5/SNX1/PRKN/KLHL20/RNF146/RNF122/GNA12/SUFU/RNASE6/LRRK2/RAB12/PINK1/P2RX7/AZIN2/SDC3/FBXL5/CIRBP/RNF11/FLNA/CTIF/IL33/PYGM/AGO3/FAP/MYLIP/CSPG4/OAZ2/USP11/RDX/UVRAG/FBXL17/ZSWIM9/PRKAC…	BP
peptidyl-tyrosine phosphorylation	190/7182	346/17910	1.38234e-08	3.1939e-07	2.38798e-07	190	TEK/IL6ST/PECAM1/PDGFRB/HTR2A/DLG4/TIE1/DDR2/GREM1/EFEMP1/HGF/FGF7/THY1/NRP1/ANGPT1/ROR2/EPHA3/THBS4/CSF1R/PDGFRA/FLT4/PEAK1/GHR/FYN/CD81/ARL2BP/TGFB1/SFRP1/SH2B3/SOCS5/ABL1/SFRP2/PDGFC/GAS6/FGFR1/ROR1/KDR/ISL1/IGF1/ITGB3/FGF10/NOX4/NEK1/FER/DSTYK/PPP2R5B/CSPG4/AXL/PDGFD/TAL1/HYAL2/FES/DUSP22/KIT/CD4/BST1/MERTK/PRNP/FLT1/JAK1/ABL2/ABI2/MATK/INPP5F/CLK4/HCLS1/SHC1/ITGA5/CD36/ENPP2/MELK/MST1R/TREM2…	BP
negative regulation of immune system process	239/7182	451/17910	1.44209e-08	3.32482e-07	2.48587e-07	239	A2M/LRRC32/EMILIN1/SLIT2/FBN1/SERPING1/CD200/TGFB3/GREM1/GLI3/STAT5B/THY1/MAFB/ANGPT1/PDE5A/FOXF1/CXCL12/LRRC17/MEIS1/ADGRF5/HLX/TGFB1/TWSG1/SFRP1/LOXL3/SOCS5/PIK3R1/THBS1/HTRA1/FCGR2B/CCL2/DUSP3/APOD/COL3A1/FGL2/SARM1/IL33/TSC22D3/LY96/FER/MILR1/ZBTB16/ITPKB/GPNMB/IL17D/AXL/NME1/DUSP1/ADCYAP1/ZFP36L1/TAL1/LDB1/DUSP22/CD14/TMEM131L/ZBTB46/MERTK/PRNP/GATA2/PPP3CB/TLR4/BCL6/PTPRS/ATM/DTX1/PRKAR1A/P…	BP
regulation of cell-matrix adhesion	77/7182	117/17910	1.57535e-08	3.62431e-07	2.70979e-07	77	TEK/DLC1/GREM1/ACVRL1/THY1/NRP1/PPM1F/EPHA3/BCL2/PEAK1/LRP1/SFRP1/PHLDB2/PIK3R1/ABL1/THBS1/FAM107A/UTRN/CSF1/MACF1/ILK/DUSP3/APOD/KDR/COL16A1/DAPK3/ARHGAP6/GPM6B/LDB1/DUSP22/BST1/BCL6/PTEN/CORO1C/CDH13/MMP14/CD36/CLASP1/PLEKHA2/ROCK1/NINJ1/CCR7/LIMCH1/POSTN/LIMS1/CLASP2/RASA1/MYOC/CCL28/MAP4K4/CD3E/FERMT1/ITGB1BP1/CIB1/PRKCZ/SERPINE1/MMP12/CCL21/SLC9A1/CAMSAP3/IQGAP1/EFNA5/RHOA/S100A10/CDKN2A/RAC…	BP
regulation of immune response	500/7182	1033/17910	1.58809e-08	3.64585e-07	2.72589e-07	500	A2M/C1S/C1R/MAPK10/IL6ST/CD34/SERPING1/IL1R1/CD200/TGFB3/COLEC12/MEF2C/C1RL/STAT5B/THY1/C4A/ANGPT1/CTSK/CMTM3/FOXF1/BCL2/C7/STING1/TRIL/NOD1/PJA2/PRKCH/FYN/CD81/HLX/WIPF1/TGFB1/C4B/LOXL3/SOCS5/PIK3R1/ABL1/CFH/CLEC10A/CLEC2B/PRKCB/P2RX7/FCGR2B/ELMO1/DUSP3/CD1D/WASF2/COL1A2/COL3A1/TLR7/MS4A2/PRKACB/FCER1A/CD99/C3/LAIR1/RFTN1/SPON2/SARM1/IL33/LY96/FER/CREBBP/PROS1/RAPGEF1/CD300LB/ITGB1/PIK3R6/PDE4B/…	BP
protein localization to membrane	282/7182	545/17910	1.59852e-08	3.662e-07	2.73797e-07	282	MAPK10/RAMP3/DCHS1/DLG4/GPC6/RAMP2/RAB31/NLGN2/DAB2/EHD2/RHOQ/AR/STOM/PALM/NRXN2/THY1/CLIP3/ANK2/RILPL1/TTC7B/EPHA3/BCL2/MAGI2/FERMT2/SHANK3/MYADM/GSN/LRP1/PRKCH/SH3PXD2B/FYN/CD81/GLRB/TGFB1/RAB8B/PRKN/PIK3R1/GAS6/TMEM88/COLQ/SYNGAP1/VAMP2/MACF1/DLG2/TRAM1L1/PTN/GRIK5/SSH1/CACNB2/SORBS1/EPB41L3/PID1/FLNA/RFTN1/MYO5A/TRAM2/KCNB1/NFASC/PACS1/RDX/ITGB1/SEC23A/SYNE3/RAP1A/FAM126A/ARL6/PKP3/REEP1/CNPY…	BP
cellular extravasation	45/7182	59/17910	1.6723e-08	3.82291e-07	2.85828e-07	45	PECAM1/SELP/IL1R1/THY1/CXCL12/CD99L2/PLVAP/ITGA1/CCL2/FER/ITGB1/PDGFD/VCAM1/BST1/JAML/SELPLG/ITGA4/PIK3CD/CX3CR1/CCR2/SELE/SIRPA/ROCK1/SELL/SPN/RIPOR2/ITGB2/PLCB1/CCL28/PODXL2/PTGER4/PIK3CG/CCL21/PTAFR/GCNT1/MADCAM1/AGER/ITGB7/ABR/LEP/MDK/IL27RA/CRK/CX3CL1/ELANE	BP
regulation of cellular component size	175/7182	315/17910	1.67656e-08	3.82453e-07	2.85949e-07	175	ELN/AKT3/KIRREL1/SLIT2/SPART/ISLR2/LRRC8C/NRP1/MSN/MAP1B/CXCL12/SHANK3/BMPR2/MYADM/ADD1/GSN/LRP1/FCHSD2/JMY/SEMA3G/EVL/TMOD2/ABL1/PLXNA4/DPYSL2/TMOD1/P2RX7/MACF1/ILK/ULK2/LMOD1/KCNMA1/PREX1/NTN1/FER/ANO6/RDX/MEGF8/RTN4/PLEKHH2/PLEKHG2/OLFM1/AQP1/FN1/PAFAH1B1/CFL2/SRF/RUFY3/PTPRS/ABI2/PTEN/DSTN/SWAP70/CLCN6/NCKAP1L/PICALM/HCLS1/TRIOBP/IL7R/MAPT/MAGEL2/CREB1/MAP2/EZR/PAK3/FHOD3/WASF1/ARPIN/BBS4/PRK…	BP
response to reactive oxygen species	134/7182	230/17910	1.71266e-08	3.89864e-07	2.9149e-07	134	FBLN5/GUCY1B1/PKD2/PDGFRB/CYP1B1/HGF/SESN3/BCL2/PDGFRA/GNAO1/FYN/TXNIP/ABL1/ETS1/MTR/CRYAB/LRRK2/PINK1/MMP2/APOD/RHOB/SLC8A1/FER/AXL/DUSP1/TRPC6/PDGFD/HYAL2/AQP1/CDK1/TACR1/CCL19/TPM1/NOS3/AIFM1/COL1A1/FOXO1/CCNA2/TXN/CFLAR/CD36/MAPT/PYCR1/PCNA/CAMKK2/KCNA5/SIRPA/ZNF580/MAPK13/CCR7/EZH2/NR4A3/JUN/MAP1LC3A/SIRT1/NUDT15/SZT2/PDK2/TNFAIP3/PSAP/BTK/FOXO3/PPIF/ERCC6L2/CAT/MAPK7/SMPD3/EEF2/MYB/ENDOG/EC…	BP
cell surface receptor signaling pathway involved in cell-cell signaling	305/7182	596/17910	1.76939e-08	4.01931e-07	3.00512e-07	305	RECK/ZEB2/RBMS3/ADGRA2/HIC1/BICC1/PKD2/GLI1/DLG4/GPC6/PRICKLE1/MDFIC/DACT1/NLGN2/FZD4/DAB2/NFATC4/GREM1/MCC/MEF2C/GLI3/IGFBP4/WWTR1/GLI2/PLPP3/RSPO3/DAAM2/FRZB/DKK3/ROR2/FZD1/CALCOCO1/ANKRD6/MAGI2/NLGN3/SKI/FERMT2/SOX17/SHANK3/TRABD2B/TLE4/LRP1/AMOTL1/GNAO1/TGFB1I1/PRICKLE2/SMO/GLRB/SFRP4/LATS2/PKD1/PYGO1/CMAHP/RSPO1/SFRP1/MITF/PRKN/ABL1/DACT3/SFRP2/RNF146/TCF7L1/WLS/WNT2B/TMEM88/LRRK2/INSYN1/DIX…	BP
negative regulation of intracellular signal transduction	284/7182	550/17910	1.83761e-08	4.1655e-07	3.11442e-07	284	CLIC2/TIMP2/HEG1/EMILIN1/PKD2/SLIT2/ITPR1/DACT1/DLC1/FBLN1/LPAR1/TIMP3/RORA/WWC3/PDE2A/LEPROT/RASIP1/SESN3/BCL2/MAGI2/APLNR/CXCL12/MYADM/GNAI2/WTIP/LMO3/SMPD1/PIK3IP1/SPRY1/SFRP1/SH2B3/PRKN/ABL1/SFRP2/PDE3A/CAVIN3/THBS1/CRTC3/DUSP26/LRRK2/SYNGAP1/PINK1/HIPK3/PHLDA3/P2RX7/DUSP3/CGNL1/EPM2A/RASA3/HDAC7/RASSF2/ATP2B4/PPP2R5B/RAPGEF1/RGS4/CARD8/PER1/ITGB1/DUSP1/ACKR3/RGS2/HYAL2/CYLD/ARRDC3/PAFAH1B1/M…	BP
regulation of cell growth	213/7182	396/17910	1.84302e-08	4.16901e-07	3.11705e-07	213	FBLN5/IGFBP7/SLIT2/IGFBP5/APBB1/SPART/GREM1/SLIT3/IGFBP4/ISLR2/ACVRL1/FRZB/NRP1/RERG/BCL2/MAP1B/SOX17/CXCL12/BMPR2/LTBP4/LRP1/CLSTN3/NPR1/SEMA3G/TGFB1/SFRP1/PRKN/ABL1/PLXNA4/DACT3/SFRP2/DPYSL2/MEG3/CRYAB/FAM107A/PTCH2/MACF1/ILK/FHL1/ULK2/IGF1/EPB41L3/PI16/NTN1/TSPYL2/AVPR1A/RGS4/MEGF8/MYOCD/RTN4/PRDM11/RGS2/OLFM1/HYAL2/AKAP6/FN1/PAFAH1B1/SPOCK1/WFDC1/SIPA1/SERPINE2/TGFBR1/RASGRP2/SRF/BCL6/RUFY3/P…	BP
negative regulation of phosphate metabolic process	294/7182	572/17910	1.85476e-08	4.18679e-07	3.13034e-07	294	HEG1/EMILIN1/LDLRAD4/KIRREL1/SLIT2/ENG/DACT1/FBLN1/GREM1/TIMP3/HGF/WWTR1/PLPP3/THY1/ADARB1/RASIP1/ANGPT1/PPM1F/MYADM/GNAI2/LMO3/SMPD1/LATS2/TGFB1/NR2F2/PIK3IP1/CTDSP2/MARF1/SPRY1/SFRP1/SH2B3/SOCS5/PRKN/ABL1/SFRP2/ZFYVE1/GFRA2/DUSP26/LRRK2/PINK1/HIPK3/CRY2/P2RX7/DLG2/ILK/DUSP3/PPP1R14A/PTN/NIBAN1/CCDC8/RASSF2/PID1/DMD/TERF2IP/KAT2B/INKA1/RAPGEF1/RGS4/PRKAR2B/PER1/DUSP1/MYOCD/RGS2/HYAL2/PPP1R16B/CY…	BP
vascular endothelial growth factor receptor signaling pathway	64/7182	93/17910	1.88238e-08	4.24027e-07	3.17033e-07	64	MMRN2/EMILIN1/VEGFC/PRKD1/FZD4/NRP1/FLT4/FYN/VEGFB/PIK3R1/NRP2/PRKCB/ELMO1/KDR/WASF2/ARNT/ITGB3/FGF10/ITGAV/SULF1/SHC2/AXL/MAPK11/PIK3CA/EPN2/FLT1/PGF/DOCK1/NCKAP1L/ITGA5/NEDD4/ELMO2/ROCK1/FOXC2/CYBB/PDCD6/BRK1/MIR10B/HSP90AA1/MYOF/MAPKAPK2/NCK1/FGF18/PTPN1/NCK2/MAPK14/GRB10/MAPKAPK3/NCF4/HIF1A/VAV1/HHEX/NCF1/RHOA/CYFIP2/RAC1/CADM4/NCF2/ROCK2/PXN/HSPB1/SRC/CYFIP1/CRK	BP
positive regulation of leukocyte cell-cell adhesion	126/7182	214/17910	1.91726e-08	4.30984e-07	3.22234e-07	126	IL6ST/GLI3/GLI2/STAT5B/THY1/TGFBR2/FYN/CD81/HLX/TGFB1/SOCS5/PIK3R1/ETS1/CCL2/ZMIZ1/CD1D/IGF1/LGALS1/ZBTB16/ITPKB/PIK3R6/CYLD/PIK3CA/CD4/VCAM1/CD28/CCL19/AIF1/NLRP3/BCL6/ITGA4/CD209/TESPA1/IL4R/NCKAP1L/IL7R/VSIR/PAK3/DOCK8/CCR2/TNFSF4/TNFSF14/HSPD1/CD83/CCR7/LILRB1/CAV1/NR4A3/GRAP2/EGR3/CD86/ZBTB1/EFNB3/LILRB2/PDCD1LG2/GATA3/CD276/TRAF6/CD6/CD40LG/MYB/PTPRC/RASAL3/ITGB2/HAS2/PNP/FOXP3/TFRC/CD3E/BT…	BP
gland development	225/7182	422/17910	1.95897e-08	4.39445e-07	3.2856e-07	225	PKD2/GLI1/TCF21/SERPINF1/IGFBP5/TGFB3/AR/HGF/GLI3/GLI2/FGF7/STAT5B/FRZB/NRP1/CYP7B1/DKK3/MAFB/MSN/FOXF1/BCL2/PBX1/ROBO1/CSF1R/CDO1/TGFBR2/PDGFRA/SMO/HLX/ALDH1A3/PKD1/NOTCH4/LBH/TGFB1/TWSG1/SFRP1/ABL1/ETS1/WLS/PGR/LIMS2/TGFBR3/FGFR1/CSF1/PTN/ISL1/PAM/FGF10/NTN1/NCOA1/SULF1/CITED2/NFIB/NME1/ARID5B/ADCYAP1/HAND2/RAP1A/RTN4/PLXND1/PIK3CA/SERPINE2/BMPR1A/SNAI2/TGFBR1/SRF/ESRP2/GATA2/TNC/WDR35/PTEN/ATM…	BP
negative regulation of protein modification process	307/7182	601/17910	2.0079e-08	4.49487e-07	3.36068e-07	307	HEG1/EMILIN1/LDLRAD4/KIRREL1/SLIT2/ENG/CRTAP/DACT1/FBLN1/GREM1/TIMP3/HGF/FRY/WWTR1/PLPP3/THY1/ADARB1/RASIP1/ANGPT1/PPM1F/SKI/MYADM/GNAI2/FYN/LMO3/SMPD1/LATS2/TGFB1/NR2F2/BEX4/DYSF/CTDSP2/SPRY1/SFRP1/SH2B3/SOCS5/PRKN/ABL1/SFRP2/RASD2/GFRA2/PHF1/FXYD1/DUSP26/LRRK2/PINK1/HIPK3/CRY2/NXN/P2RX7/ILK/DUSP3/TINF2/PPP1R14A/PTN/NIBAN1/RASSF2/ATP2B4/PID1/DMD/TERF2IP/KAT2B/INKA1/P3H1/RAPGEF1/RGS4/PRKAR2B/PER1…	BP
JNK cascade	119/7182	200/17910	2.05055e-08	4.57137e-07	3.41788e-07	119	ZEB2/MAPK10/MAP3K12/MDFIC/DACT1/FZD4/SH2D3C/ARHGEF6/SH3RF3/ROR2/NRK/NOD1/CCN2/PJA2/FLT4/SFRP1/PRKN/SFRP2/PINK1/HIPK3/FCGR2B/DUSP3/SASH1/RASSF2/FZD8/RAPGEF1/PER1/FZD7/CYLD/PAFAH1B1/CCL19/GADD45B/MAP3K20/TLR4/EDA2R/FGD2/PKN1/AIDA/TIAM1/ZMYND11/TAB2/MAP3K21/SIRPA/TRAF4/CCR7/MAP3K6/EPHA4/MAP2K7/TAOK1/ARHGEF5/DUSP19/IRAK4/TRAF6/F2RL1/MAP3K2/SLAMF1/TLR6/MAP4K5/SH2D3A/DVL2/CD40LG/MAP3K7/MAPK8IP1/MAP3K9/…	BP
regulation of mononuclear cell proliferation	119/7182	200/17910	2.05055e-08	4.57137e-07	3.41788e-07	119	LRRC32/IL6ST/MEF2C/STAT5B/PDE5A/BCL2/TGFBR2/GPR183/CD81/TGFB1/TWSG1/FCGR2B/TNFSF8/CSF1/CD1D/IGF1/FGF10/GPNMB/CD4/VCAM1/TMEM131L/CD28/TACR1/CCL19/AIF1/PRNP/TLR4/BCL6/ATM/PRKAR1A/CD209/PKN1/NCKAP1L/NFATC2/SOS1/VSIR/CCR2/TNFSF4/VSIG4/TYROBP/LMO1/LILRB1/SPN/TAC1/LST1/TNFSF18/LILRB2/PDCD1LG2/AHR/CD276/TRAF6/BTK/CD6/CD40LG/PTPRC/DLG5/MNDA/TNFRSF1B/MAPK8IP1/RASAL3/PNP/FOXP3/TFRC/CD3E/TIRAP/ZAP70/HAVCR2/…	BP
regulation of leukocyte cell-cell adhesion	165/7182	295/17910	2.27737e-08	5.06657e-07	3.78813e-07	165	LRRC32/IL6ST/GLI3/GLI2/STAT5B/THY1/PDE5A/CXCL12/TGFBR2/FYN/CD81/HLX/TGFB1/TWSG1/LOXL3/SOCS5/PIK3R1/ETS1/FCGR2B/CCL2/DUSP3/ZMIZ1/CD1D/IGF1/LGALS1/ZBTB16/ITPKB/GPNMB/PIK3R6/CYLD/DUSP22/PIK3CA/CD4/VCAM1/TMEM131L/CD28/CCL19/AIF1/PRNP/NLRP3/BCL6/ITGA4/DTX1/PRKAR1A/CD209/TESPA1/IL4R/NCKAP1L/IL7R/VSIR/PAK3/DOCK8/CCR2/TNFSF4/VSIG4/TNFSF14/HSPD1/CD83/CCR7/LILRB1/CAV1/NR4A3/GRAP2/EGR3/CD86/WNK1/ZBTB1/SPN/J…	BP
negative regulation of organelle organization	192/7182	352/17910	2.304e-08	5.11525e-07	3.82452e-07	192	S1PR1/SLIT2/DLC1/HGF/FEZ1/CLIP3/NAV3/TTBK2/HDGFL3/SKI/MAP1B/SHANK3/MYADM/ADD1/GSN/BMERB1/PHLDB2/TMOD2/PRKN/TMOD1/PHF1/MAP4/LRRK2/PINK1/TINF2/WASF2/IGF1/LMOD1/TERF2IP/KAT2B/RDX/DUSP1/ARHGAP6/SMG6/PLEKHH2/VAT1/SETMAR/CCNB1/ATM/MAD2L1/STMN2/SWAP70/PRKAR1A/PHF2/FEZ2/SLC25A5/CLU/FLCN/TRIOBP/CORO2B/EVI5L/TSC2/MAPT/CLASP1/INPP5K/MAP2/CDC20/TSPO/RNF41/ARAP1/FHOD3/APC/ARPIN/BBS4/PLK1/ARHGEF2/WASHC2C/AURKB…	BP
negative regulation of phosphorus metabolic process	294/7182	573/17910	2.30919e-08	5.11626e-07	3.82528e-07	294	HEG1/EMILIN1/LDLRAD4/KIRREL1/SLIT2/ENG/DACT1/FBLN1/GREM1/TIMP3/HGF/WWTR1/PLPP3/THY1/ADARB1/RASIP1/ANGPT1/PPM1F/MYADM/GNAI2/LMO3/SMPD1/LATS2/TGFB1/NR2F2/PIK3IP1/CTDSP2/MARF1/SPRY1/SFRP1/SH2B3/SOCS5/PRKN/ABL1/SFRP2/ZFYVE1/GFRA2/DUSP26/LRRK2/PINK1/HIPK3/CRY2/P2RX7/DLG2/ILK/DUSP3/PPP1R14A/PTN/NIBAN1/CCDC8/RASSF2/PID1/DMD/TERF2IP/KAT2B/INKA1/RAPGEF1/RGS4/PRKAR2B/PER1/DUSP1/MYOCD/RGS2/HYAL2/PPP1R16B/CY…	BP
cellular homeostasis	402/7182	814/17910	2.55011e-08	5.63846e-07	4.21571e-07	402	CYBRD1/S1PR1/CLIC2/SYNPO/TNS2/RAMP3/PKD2/ITPR1/HTR2A/DLG4/TXNDC15/EDNRA/SERPINF1/S1PR3/LPAR1/CYSLTR1/MAP1A/TRPC1/LRRC8C/CLIC4/THY1/ATP1B2/KLF7/ANK2/BCL2/C7/APLNR/CXCL12/SHANK3/PDGFRA/ADD1/SLC39A13/LRP1/SLC22A17/FYN/F2R/ADCY5/PKD1/FGF2/KCTD7/TGFB1/EDNRB/PRKN/PIK3R1/ABL1/GAS6/PTH1R/CCL14/LRRK2/PRKCB/PINK1/ATP6V1G2/NXN/P2RX7/CCL2/FBXL5/GRIK5/RASA3/ZBTB20/SLC8A1/ATP2B4/LGALS1/CACNB2/KCNMA1/CACNA1C/DM…	BP
T cell activation involved in immune response	61/7182	88/17910	2.63768e-08	5.82016e-07	4.35156e-07	61	RORA/GPR183/CD81/HLX/LOXL3/SOCS5/FCGR2B/FGL2/CD1C/FOXP1/CCL19/NLRP3/BCL6/IL4R/TNFSF4/LEF1/LILRB1/CD86/STAT3/SPN/JAK3/EOMES/SLAMF6/TNFSF18/GATA3/F2RL1/LY9/ITGAL/ZC3H12A/MYB/SMAD7/FOXP3/HAVCR2/CD46/CEACAM1/STAT6/PRKCZ/APBB1IP/PTGER4/LGALS3/IL6/RELB/EIF2AK4/IL18R1/ATP7A/NFKBID/RORC/TMEM98/ZBTB7B/LCP1/IL12RB1/TSC1/HLA-DMB/HMGB1/IRF4/RC3H1/RIPK2/ANXA1/MDK/SLC11A1/RAB27A	BP
negative regulation of cell differentiation	362/7182	725/17910	2.90048e-08	6.38698e-07	4.77536e-07	362	CNTN4/NR2F1/PMP22/LDLRAD4/SLIT2/FBN1/NPR2/PRICKLE1/RUNX1T1/DENND5A/ZFPM2/FBLN1/IGFBP5/PLPP7/S1PR3/LPAR1/SPART/NFATC4/GREM1/EFEMP1/GLI3/ZEB1/WWTR1/GLI2/STAT5B/DAAM2/RORA/ACVRL1/THY1/FRZB/NRP1/DPYSL3/TMEM119/MAFB/VIM/BCL2/PBX1/NLGN3/SKI/SOX17/TWIST2/LRRC17/MEIS1/NOTCH3/LRP1/PRDM6/BMERB1/TGFB1I1/SMO/HLX/NOTCH4/SEMA3G/LBH/TGFB1/TWSG1/TRAK2/COL5A1/EDNRB/RGMA/SFRP1/LOXL3/SOCS5/PIK3R1/DACT3/SFRP2/SUFU/H…	BP
protein catabolic process	395/7182	799/17910	2.91466e-08	6.40513e-07	4.78893e-07	395	FBXL7/TNFSF12/PRICKLE1/DACT1/DAB2/KCTD10/MAP1A/TIMP3/ECSCR/WWTR1/RNF217/SPSB1/MSN/CTSK/SOX17/USP51/LRP1/TGFB1I1/FYN/CD81/PKD1/DYSF/SOCS5/SNX1/PRKN/KLHL20/RNF146/RNF122/GNA12/SUFU/LRRK2/RAB12/PINK1/P2RX7/AZIN2/FBXL5/RNF11/FLNA/IL33/FAP/MYLIP/OAZ2/USP11/RDX/FBXL17/ZSWIM9/PRKACA/FBXO31/LNPEP/CYLD/CRBN/TIMP1/RNF216/CDK1/NTAN1/SH3D19/RCN3/PBK/SERPINE2/WDR81/SNX33/FBXL22/UCHL3/USP20/PTTG1/CAMLG/PTEN/CC…	BP
purine nucleotide metabolic process	273/7182	528/17910	2.95895e-08	6.48923e-07	4.85181e-07	273	PDE1A/GUCY1B1/GUCY1A1/HTR2A/NPR2/RHOQ/FAM20C/RORA/PDE2A/PDE5A/ADCY4/PDE7B/ADCY9/GIMAP7/NPR1/ADCY5/TGFB1/GUCY1A2/ISCU/AASS/LRRK2/PINK1/P2RX7/DLG2/PRXL2C/IGF1/TPST1/ARNT/ZBTB20/PID1/PDE8B/MECP2/ACACB/COX5A/NME1/PDE4B/ADCYAP1/RAB23/CDK1/MOCS1/ATP5MC1/ATP1A2/COX6A1/PRKAG2/NOS3/ADCY2/ATP5MC3/CCNB1/PDPR/UQCRH/SLC25A12/OXSM/ELOVL5/FLCN/PDE9A/COX5B/CBFA2T3/ELOVL6/UQCRC1/COA6/TREM2/TSPO/PDE4D/ELOVL4/HACD1…	BP
negative regulation of apoptotic process	437/7182	894/17910	3.06073e-08	6.69885e-07	5.00853e-07	437	TEK/IL6ST/PDGFRB/MAP3K12/RAMP2/DAB2/TGFB3/NFATC4/GREM1/AR/HGF/MEF2C/GLI3/GLI2/PTGFR/CAMK1D/PEA15/STAT5B/NRP1/ANGPT1/NOTCH2/BCL2/CSF1R/CXCL12/TWIST2/GNAI2/FLT4/MEIS3/LRP1/PRKCH/FYN/F2R/SMO/EDNRB/SFRP1/MITF/PRKN/PIK3R1/ABL1/SFRP2/PDE3A/KLHL20/GAS6/THBS1/CRYAB/LIMS2/LRRK2/SYNGAP1/PINK1/HIPK3/CCL2/ILK/KDR/NGF/ISL1/IGF1/FGF10/FLNA/DIPK2A/ITSN1/TSC22D3/ITGAV/EPCAM/DSTYK/MECP2/CITED2/CCN1/ITPKB/HSPB6/AX…	BP
regulation of lymphocyte proliferation	118/7182	199/17910	3.07906e-08	6.71173e-07	5.01816e-07	118	LRRC32/IL6ST/MEF2C/STAT5B/PDE5A/BCL2/TGFBR2/GPR183/CD81/TGFB1/TWSG1/FCGR2B/TNFSF8/CD1D/IGF1/FGF10/GPNMB/CD4/VCAM1/TMEM131L/CD28/TACR1/CCL19/AIF1/PRNP/TLR4/BCL6/ATM/PRKAR1A/CD209/PKN1/NCKAP1L/NFATC2/SOS1/VSIR/CCR2/TNFSF4/VSIG4/TYROBP/LMO1/LILRB1/SPN/TAC1/LST1/TNFSF18/LILRB2/PDCD1LG2/AHR/CD276/TRAF6/BTK/CD6/CD40LG/PTPRC/DLG5/MNDA/TNFRSF1B/MAPK8IP1/RASAL3/PNP/FOXP3/TFRC/CD3E/TIRAP/ZAP70/HAVCR2/HHLA2…	BP
positive regulation of epithelial cell proliferation	118/7182	199/17910	3.07906e-08	6.71173e-07	5.01816e-07	118	TEK/AKT3/TNFSF12/PRKD1/AR/FGF7/ACVRL1/NRP1/CYP7B1/NOTCH2/THBS4/APLNR/CXCL12/BMPR2/FLT4/SMO/FGF2/TGFB1/FGF1/DYSF/SFRP1/NRP2/LAMB1/HTRA1/FGFR1/PTN/KDR/IGF1/ARNT/ITGB3/FOXP2/FGF10/LAMC1/NME1/FZD7/RTN4/PPP1R16B/TACR1/JAML/BMPR1A/TGFBR1/ESRP2/GATA2/BMP6/ITGA4/HTR2B/CFLAR/CDH13/STAT5A/OSR1/AGTR1/PLCG1/PDGFB/NOG/MAP2K5/EGFL7/ZNF304/TWIST1/ZNF580/NR4A3/ID1/EGR3/STAT3/C5AR1/SOX9/JUN/LRG1/SEMA5A/SIRT1/JCAD…	BP
bone development	113/7182	189/17910	3.18688e-08	6.92174e-07	5.17518e-07	113	TEK/FBN1/DCHS1/ENG/NPR2/FOXN3/THBS3/TGFB3/GREM1/MEF2C/GLI3/FAT4/FLI1/FAM20C/TMEM119/NOTCH2/SKI/BMPR2/PIP4K2A/SPARC/TGFBR2/LRRC17/MEIS1/MEF2D/SH3PXD2B/SFRP4/TGFB1/SH2B3/SFRP2/PDGFC/WASF2/IGF1/SULF1/P3H1/FREM1/ANO6/MEGF8/RARB/RAB23/TAL1/FOXP1/POC1A/KIT/PAFAH1B1/CCN4/XYLT1/SRF/BMP6/LOX/COL1A1/BBX/CHSY1/GJA1/HOXB4/GLG1/MMP14/SMAD5/AKAP13/PEX7/SERPINH1/TULP3/TYROBP/MMP16/TWIST1/LILRB1/CTC1/SOX9/LRRK1/…	BP
viral process	405/7182	822/17910	3.18823e-08	6.92174e-07	5.17518e-07	405	IL6ST/MPDZ/HTR2A/MDFIC/FBLN1/STOM/CD93/NFIA/MXRA8/ADARB1/VIM/BCL2/STING1/CXCL12/MID2/PDGFRA/GSN/TLN1/HCFC2/ATF7/FYN/CD81/TGFB1/AP1M1/PRKN/PIK3R1/CFH/NRP2/GAS6/CRTC3/TRIM23/FCGR2B/CCL2/NLRP1/ELMO1/CRTC1/KDR/WASF2/LGALS1/ITGB3/ITSN1/KAT2B/ZYX/ITGAV/SATB1/CREBBP/AXL/ITGB5/PACS1/ITGB1/TSPAN7/UVRAG/ACKR3/TBKBP1/TRIM6/HYAL2/IL16/CD4/KPNA5/RNF216/CDK1/CD28/SELPLG/CAMLG/EPS15/ABI2/AP1M2/RRAGA/RNASEL/KRT1…	BP
positive regulation of actin filament bundle assembly	44/7182	58/17910	3.20715e-08	6.94883e-07	5.19543e-07	44	LPAR1/TGFB3/ARHGEF15/NRP1/PPM1F/CCN2/SH3PXD2B/EVL/SFRP1/ABL1/NOX4/FLNA/SORBS3/GPR65/TACR1/TGFBR1/TPM1/SWAP70/ID1/ARHGEF10/LIMCH1/TAC1/RGCC/ARHGEF5/RAPGEF3/MYOC/ITGB1BP1/CARMIL1/TESK1/RHOA/S100A10/RAC1/PAK1/TSC1/FHOD1/ROCK2/PLEK/PXN/ARHGEF10L/VIL1/EPHA1/NF2/CX3CL1/RHOC	BP
positive regulation of catabolic process	210/7182	392/17910	3.53498e-08	7.62848e-07	5.7036e-07	210	DCN/TNFSF12/HTR2A/PRICKLE1/PRKD1/DACT1/DAB2/ECSCR/MSN/STING1/SOX17/PIP4K2A/MID2/NOD1/FTO/LRP1/CD81/SOCS5/SNX1/PRKN/FYCO1/LRRK2/RAB12/PINK1/P2RX7/PRXL2C/FBXL5/KDR/IGF1/EPM2A/ARNT/ZBTB20/ABCD2/IL33/MYLIP/OAZ2/RDX/HSPB8/UVRAG/ADRB2/ZFP36L1/TNRC6C/SH3D19/SNX33/TNRC6B/PTEN/ATM/FOXO1/RNF152/SH3GLB1/RNF185/GJA1/RBM24/VPS13D/BAG2/TRIM22/CLU/TPCN1/FLCN/RAB3GAP1/RNF128/TRIM8/UBQLN2/TSC2/CBFA2T3/NEDD4/VSIR/…	BP
muscle tissue development	210/7182	392/17910	3.53498e-08	7.62848e-07	5.7036e-07	210	S1PR1/HEG1/DCN/ELN/PKD2/PDGFRB/GLI1/TCF21/HEYL/ENG/ZFPM2/MEOX2/IGFBP5/GREM1/MEF2C/SGCD/TENM4/MSC/BCL2/SKI/SOX17/MYH10/TGFBR2/PDGFRA/MEIS1/GJA5/MEF2D/SMO/HLX/MEF2A/FGF2/CDON/TGFB1/NR2F2/GJC1/SGCB/TGFBR3/FGFR1/MRTFB/ISL1/IGF1/COL3A1/SLC8A1/FOXP2/PI16/NOX4/DIPK2A/SVIL/VAMP5/ASB2/JPH2/PLN/CCM2L/RGS4/ITGB1/MYOCD/RARB/MAPK11/BVES/FZD7/KCNAB1/MYLK/RGS2/AKAP6/KCNK2/CDK1/BMPR1A/CFL2/TGFBR1/MYH11/TPM1/SRF/…	BP
positive regulation of chemotaxis	83/7182	130/17910	3.57219e-08	7.6934e-07	5.75213e-07	83	S1PR1/PDGFRB/SLIT2/VEGFC/PRKD1/LPAR1/CAMK1D/NRP1/PPM1F/THBS4/CXCL12/BMPR2/FGF2/SMOC2/TGFB1/RARRES2/DYSF/GAS6/THBS1/FGFR1/CSF1/PTN/KDR/P2RY12/FGF10/ANO6/MEGF8/PDGFD/CCR4/C3AR1/IL16/CCL19/AIF1/SWAP70/CDH13/NCKAP1L/TIAM1/CXCR4/TREM2/CCR2/PDGFB/TNFSF14/ZNF580/CCR7/CMKLR1/GPSM3/C5AR1/WNK1/RIPOR2/SEMA5A/CCR1/IL6R/F2RL1/C1QBP/S100A14/TIRAP/TMEM102/FGF18/LGMN/AKIRIN1/SCG2/SERPINE1/MAPK14/IL6/CXCL17/CCL21…	BP
positive regulation of cytokine production	235/7182	446/17910	3.59549e-08	7.72816e-07	5.77812e-07	235	IL6ST/HEG1/CD34/LUM/CYP1B1/IL1R1/CD200/NFATC4/HGF/LURAP1/STAT5B/RORA/STING1/CSF1R/NOD1/FLT4/LRP1/C1QTNF4/CD81/F2R/TGFB1/PIK3R1/ABL1/THBS1/LRRK2/P2RX7/NLRP1/ISL1/ARNT/TLR7/ZBTB20/C3/AKAP12/SPON2/IL33/LY96/SULF1/CREBBP/CCM2L/IL17D/CARD8/MAPK11/PDE4B/ADCYAP1/TRIM6/HYAL2/C3AR1/CD14/CD4/CD28/TLR5/TLR1/CCL19/AIF1/NLRP3/TLR4/HTR2B/RNF135/TRIM15/IL4R/CLU/CD36/FCN1/CREB1/TREM2/RAB7B/IFI16/PDE4D/CCR2/RNF12…	BP
regulation of stress fiber assembly	58/7182	83/17910	3.65762e-08	7.84606e-07	5.86627e-07	58	S1PR1/DLC1/LPAR1/TGFB3/ARHGEF15/NRP1/PPM1F/CCN2/SH3PXD2B/EVL/SFRP1/PHLDB2/PIK3R1/ABL1/WASF2/NOX4/ASAP3/SORBS3/ARHGAP6/GPR65/TACR1/TGFBR1/TPM1/CORO2B/CLASP1/INPP5K/ARAP1/ROCK1/BBS4/ARHGEF10/LIMCH1/TAC1/RGCC/ARHGEF5/CLASP2/RAPGEF3/MYOC/ITGB1BP1/CARMIL1/PTGER4/TACSTD2/WAS/SLC9A1/STMN1/TESK1/RHOA/S100A10/RAC1/PAK1/TSC1/FHOD1/ROCK2/PXN/PPP1R9A/ARHGEF10L/EPHA1/NF2/RHOC	BP
reproductive system development	227/7182	429/17910	3.89171e-08	8.33166e-07	6.22934e-07	227	DCN/PKD2/PDGFRB/SLIT2/GLI1/TCF21/ZFPM2/SERPINF1/PTGIS/FZD4/DHH/AR/SLIT3/GLI3/GLI2/STAT5B/RSPO3/CYP7B1/ROR2/BCL2/VASH1/BMPR2/NRK/PDGFRA/EPAS1/PKD1/ADAMTS1/ADAM19/NR2F2/SFRP1/PCDH12/SFRP2/WNT2B/LDOC1/PGR/HTRA1/PTN/ARNT/FGF10/FLNA/NCOA1/SULF1/CITED2/CCN1/AXL/MYOCD/ARID5B/ADCYAP1/ZFP36L1/MAMLD1/BCL2L2/KIT/RNF38/SERPINE2/MERTK/TGFBR1/AGO4/NOS3/GATA2/BMP6/TNC/PTEN/ATM/MMP19/HEY2/CSDE1/FEM1B/KRT8/GJA1/T…	BP
cellular response to extracellular stimulus	143/7182	251/17910	4.14038e-08	8.84648e-07	6.61425e-07	143	PRKD1/KANK2/SESN3/BCL2/BMPR2/FYN/RIPOR1/SFRP1/SFRP2/ZFYVE1/GAS6/WNT2B/FOLR2/FAM107A/LRRK2/P2RX7/RRAGB/PTN/SSH1/P2RY12/KLF10/NCOA1/KCNB1/AVPR1A/AXL/MYOCD/MAP1LC3C/AMIGO1/FES/TNRC6A/VCAM1/SIPA1/AIF1/SNAI2/SRF/TNC/AIFM1/ITGA4/BMT2/COL1A1/RRAGA/FOXO1/RNF152/SH3GLB1/MAP1LC3B/IFI16/ATG14/ULK1/PDK4/PRKAA2/MIR125B1/POSTN/PPP1R9B/JUN/MAP1LC3A/HSPA5/DSC2/RYR3/SIRT1/CARTPT/NUDT15/RRAGC/CYBB/FADS1/SZT2/PDK2/…	BP
positive regulation of T cell activation	117/7182	198/17910	4.60792e-08	9.82598e-07	7.3466e-07	117	IL6ST/GLI3/GLI2/STAT5B/THY1/TGFBR2/FYN/CD81/HLX/TGFB1/SOCS5/PIK3R1/CCL2/ZMIZ1/CD1D/IGF1/LGALS1/ZBTB16/ITPKB/PIK3R6/CYLD/PIK3CA/CD4/VCAM1/CD28/CCL19/AIF1/NLRP3/BCL6/CD209/TESPA1/IL4R/NCKAP1L/IL7R/VSIR/PAK3/DOCK8/CCR2/TNFSF4/TNFSF14/HSPD1/CD83/CCR7/LILRB1/CAV1/GRAP2/EGR3/CD86/ZBTB1/EFNB3/LILRB2/PDCD1LG2/GATA3/CD276/TRAF6/CD6/CD40LG/MYB/PTPRC/RASAL3/PNP/FOXP3/TFRC/CD3E/BTLA/ZAP70/HAVCR2/HHLA2/CD46/H…	BP
regulation of establishment of protein localization	360/7182	723/17910	4.6326e-08	9.85913e-07	7.37138e-07	360	LRRC32/CD34/ITPR1/VEGFC/MDFIC/CD200/NLGN2/SYT11/APBB1/TGFB3/SSC5D/GLI3/STOM/LEPROT/KLF7/ANGPT1/PPM1F/PKIG/BCL2/CSF1R/MYH10/GJA5/FRMD4A/LRP1/C1QTNF4/FYN/CD81/F2R/SMO/ARL2BP/ADCY5/TGFB1/RIPOR1/SFRP1/PRKN/PIK3R1/ABL1/GAS6/WLS/SUFU/LRRK2/PINK1/VAMP2/P2RX7/FCGR2B/NLRP1/APOD/ISL1/IGF1/PAM/CACNA1C/FLNA/AKAP12/IL33/P3H1/KCNB1/OAZ2/CARD8/MAPK11/RAP1A/RAB23/PRKACA/CEP120/TRIM6/HYAL2/RAB11FIP3/FOXP1/CD14/FN…	BP
regulation of chemotaxis	111/7182	186/17910	4.83831e-08	1.02766e-06	7.68354e-07	111	ADGRA2/S1PR1/JAM3/PDGFRB/SLIT2/VEGFC/PRKD1/LPAR1/GREM1/CAMK1D/NRP1/PPM1F/ROBO1/THBS4/CXCL12/BMPR2/PDGFRA/GPR183/FGF2/SMOC2/TGFB1/RARRES2/FGF1/DYSF/PLXNA4/GAS6/THBS1/FGFR1/CCL2/CSF1/DUSP3/PTN/KDR/P2RY12/FGF10/ANO6/MEGF8/DUSP1/PDGFD/CCR4/C3AR1/IL16/BST1/CCL19/AIF1/SWAP70/CDH13/NCKAP1L/TIAM1/MYCBP2/CXCR4/CCN3/TREM2/CCR2/PDGFB/MPP1/TNFSF14/ZNF580/CCR7/CMKLR1/GPSM3/C5AR1/WNK1/RIPOR2/SEMA5A/CCR1/IL6R/F…	BP
regulation of microtubule cytoskeleton organization	103/7182	170/17910	4.92402e-08	1.04381e-06	7.8043e-07	103	PHLDB1/CLIP3/NAV3/EPHA3/TTBK2/HDGFL3/MAP1B/BMERB1/PKD1/PHLDB2/ANKRD53/ABL1/FAM107A/DIXDC1/MAP9/KAT2B/GNAI1/MECP2/CEP120/FES/CYLD/POC1A/PAFAH1B1/NIN/TOGARAM1/RASSF7/STMN2/CHMP4C/SKA3/PLK4/MAPT/CLASP1/MAP2/CDKN1B/APC/BICD2/DCTN1/SLAIN2/PLK1/ARHGEF2/NUMA1/DYNC1H1/PRKAA2/KIF11/DYRK1A/CLIP1/TAOK1/SNCA/SPAG5/NEK2/KIF18A/TPX2/CLASP2/CAMSAP2/SENP6/AURKA/STIL/SKA1/ARL2/FKBP4/BICD1/MDM1/STAG1/CHEK1/BRCA1/E…	BP
regulation of endocytosis	148/7182	262/17910	5.0954e-08	1.07803e-06	8.06009e-07	148	DLG4/PRKD1/RAB31/SYT11/DAB2/GREM1/CAMK1D/CLIP3/C4A/TUB/MFGE8/ANGPT1/EPHA3/MAGI2/STON1/SGIP1/LRP1/SFRP4/TGFB1/RSPO1/DYSF/C4B/ABL1/GAS6/HIP1/LRRK2/FCGR2B/CCL2/MCTP1/ITGB3/C3/ITSN1/ITGAV/ANO6/RAPGEF1/AXL/RAP1A/CD14/VAMP4/MERTK/CCL19/SNX33/GATA2/PPP3CB/RUFY2/AAK1/ABL2/PTEN/ANKRD13A/CDH13/SLC2A4/NCKAP1L/PICALM/CLU/UBQLN2/CD36/TSC2/PPP3CC/NR1H2/SELE/SIRPA/ARRB1/ROCK1/LILRB1/CAV1/ZFYVE16/SNX17/RUBCN/ARR…	BP
generation of precursor metabolites and energy	260/7182	502/17910	5.18347e-08	1.09451e-06	8.18336e-07	260	IL6ST/HTR2A/C1QTNF2/RUNX1T1/NFATC4/COX7A1/LEPR/ADGRF5/PCDH12/ISCU/CAVIN3/PINK1/P2RX7/COX4I2/PRXL2C/AOX1/GFPT2/IGF1/ARNT/ZBTB20/SORBS1/PID1/ADH1B/NOX4/DEGS1/PYGM/MECP2/AVPR1A/COX5A/PPP1R3F/CYCS/STEAP4/KL/PIK3CA/HSD17B6/CDK1/ATP5MC1/GYG1/COX6A1/PRKAG2/PHKG1/ATP5MC3/CCNB1/UQCRH/COX7A2/AKR1B1/SLC25A12/ACSS3/FLCN/COX5B/GPX2/CBFA2T3/INPP5K/UQCRC1/ALDH1B1/PPP1R1A/COA6/BDH2/PPP1R3C/ATP5IF1/IDH1/MTFR1/TYR…	BP
transmembrane receptor protein serine/threonine kinase signaling pathway	177/7182	323/17910	5.21543e-08	1.09911e-06	8.21773e-07	177	FSTL1/LRRC32/EMILIN1/LDLRAD4/LTBP1/FBN1/ENG/ZNF423/LTBP2/DAB2/TGFB3/CDH5/GREM1/ZEB1/WWTR1/ACVRL1/DKK3/ASPN/VIM/ROR2/FZD1/MAGI2/SKI/FERMT2/BMPR2/TGFBR2/LTBP4/CHRDL1/TGFB1I1/GDF6/SFRP4/TGFB1/TWSG1/SFRP1/CILP/ABL1/SFRP2/THBS1/NRROS/HTRA1/TGFBR3/HTRA3/ILK/BMPER/RBPMS/COL1A2/COL3A1/FGF10/ZYX/ATOH8/SULF1/CITED2/CCN1/CREBBP/GREM2/TMEM100/CLDN5/RBPMS2/ITGB5/MEGF8/MYOCD/SMAD9/LNPEP/BMPR1A/TGFBR1/VASN/BMP6…	BP
purine ribonucleotide metabolic process	259/7182	500/17910	5.41131e-08	1.13817e-06	8.50975e-07	259	PDE1A/GUCY1B1/GUCY1A1/HTR2A/NPR2/RHOQ/FAM20C/RORA/PDE2A/PDE5A/ADCY4/PDE7B/ADCY9/GIMAP7/NPR1/ADCY5/TGFB1/GUCY1A2/ISCU/AASS/LRRK2/PINK1/P2RX7/DLG2/PRXL2C/IGF1/TPST1/ARNT/ZBTB20/PID1/PDE8B/MECP2/ACACB/COX5A/NME1/PDE4B/ADCYAP1/RAB23/CDK1/MOCS1/ATP5MC1/ATP1A2/COX6A1/PRKAG2/ADCY2/ATP5MC3/CCNB1/PDPR/UQCRH/SLC25A12/OXSM/ELOVL5/FLCN/PDE9A/COX5B/CBFA2T3/ELOVL6/UQCRC1/COA6/TREM2/TSPO/PDE4D/ELOVL4/HACD1/ADCY…	BP
reproductive structure development	225/7182	426/17910	5.42449e-08	1.13872e-06	8.51388e-07	225	DCN/PKD2/PDGFRB/SLIT2/GLI1/TCF21/ZFPM2/SERPINF1/PTGIS/FZD4/DHH/AR/SLIT3/GLI3/GLI2/STAT5B/RSPO3/CYP7B1/ROR2/BCL2/VASH1/BMPR2/NRK/PDGFRA/EPAS1/PKD1/ADAMTS1/ADAM19/NR2F2/SFRP1/PCDH12/SFRP2/WNT2B/LDOC1/PGR/HTRA1/PTN/ARNT/FGF10/FLNA/NCOA1/SULF1/CITED2/CCN1/AXL/MYOCD/ARID5B/ADCYAP1/ZFP36L1/MAMLD1/BCL2L2/KIT/RNF38/SERPINE2/MERTK/TGFBR1/AGO4/NOS3/GATA2/BMP6/TNC/PTEN/ATM/MMP19/HEY2/CSDE1/FEM1B/KRT8/GJA1/T…	BP
cellular response to lipid	293/7182	575/17910	5.6933e-08	1.19283e-06	8.91844e-07	293	PLPP1/NR3C1/PLSCR4/NR2F1/RAMP3/TCF21/HEYL/TBXA2R/SERPINF1/FZD4/DAB2/LPAR1/NFATC4/AR/MEF2C/PTGFR/ZNF366/RORA/RBFOX2/CYP7B1/KANK2/CREBRF/VIM/MSN/CALCOCO1/KLF9/EPHA3/PRMT2/TGFB1I1/LMO3/SMO/ADCY5/LBH/TGFB1/NR2F2/EDNRB/SFRP1/ABL1/LDOC1/PGR/FAM107A/HDAC5/ABCA1/CRY2/CCL2/SASH1/PTN/ISL1/FBXO32/PID1/SPON2/LY86/LY96/NCOA1/GNAI1/KCNMB1/AXL/NME1/CARD8/PER1/RARB/PDE4B/FZD7/ADCYAP1/ZFP36L1/WNT9A/AQP1/GNG2/FES/…	BP
cellular response to oxidative stress	164/7182	296/17910	5.97701e-08	1.24914e-06	9.33943e-07	164	FBLN5/GUCY1B1/PKD2/CYP1B1/PRKD1/SOD3/HGF/FZD1/BCL2/PDGFRA/EPAS1/FYN/GPX8/PRKN/ABL1/ETS1/MTR/LRRK2/PINK1/MMP2/RHOB/ARNT/NOX4/FER/GPX7/AXL/TRPC6/PDGFD/CYCS/AQP1/MAPKAP1/CDK1/AIF1/TPM1/ARL6IP5/NOS3/TLR4/AIFM1/FOXO1/CCNA2/TXN/CFLAR/NFE2L1/GPX2/CD36/GSKIP/MAPT/MELK/ERO1A/PYCR1/PCNA/CHD6/CAMKK2/SIRPA/GPX3/SIRT2/ZNF580/MAPK13/PLA2R1/EZH2/NR4A3/RWDD1/PRKAA2/JUN/MAP1LC3A/SNCA/SIRT1/CPEB2/CYBB/SZT2/PDK2/TN…	BP
positive regulation of response to external stimulus	173/7182	315/17910	5.98521e-08	1.24914e-06	9.33943e-07	173	S1PR1/IL6ST/PDGFRB/SLIT2/VEGFC/PRKD1/LPAR1/CAMK1D/STAT5B/NRP1/PDE2A/PPM1F/PTGER3/THBS4/CXCL12/BMPR2/NOD1/LRP1/CD81/FGF2/SMOC2/TGFB1/RARRES2/DYSF/GAS6/ETS1/THBD/THBS1/LRRK2/FGFR1/CSF1/SASH1/PTN/KDR/P2RY12/TLR7/FGF10/C3/IL33/LY86/LY96/SCARF1/ANO6/IL17D/MEGF8/PDGFD/HYAL2/CCR4/C3AR1/IL16/CD28/CCL19/AIF1/CCN4/BMP6/TLR4/ITGAM/SWAP70/TRIM15/CDH13/NCKAP1L/AGTR1/TIAM1/CXCR4/CNR1/TREM2/CCR2/PDGFB/TNFSF4/TN…	BP
response to antibiotic	179/7182	328/17910	6.49453e-08	1.35282e-06	1.01146e-06	179	PDGFRB/CYP1B1/TBXA2R/HGF/MEF2C/AOC3/BCL2/SPARC/CDO1/GSN/GNAO1/FYN/ADCY5/TXNIP/ABL1/ETS1/CRYAB/LRRK2/PINK1/RHOB/SLC8A1/GNAI1/KCNMB1/RGS4/AXL/DUSP1/TRPC6/PDGFD/ADCYAP1/RGS2/HYAL2/CCR4/AQP1/CD14/CDK1/VCAM1/TACR1/ADCYAP1R1/TNC/AIFM1/JAK1/ADCY2/COL1A1/PTEN/SETD7/FOXO1/TXN/SLC2A4/CLU/CNR1/PYCR1/PCNA/GRIN2A/CDKN1B/ADCY3/PDGFB/KCNA5/SIRPA/PRKCE/ZNF580/MAPK13/EZH2/NR4A3/ID1/ACTC1/STAT3/CLDN7/JUN/GOT2/MAP1…	BP
regulation of leukocyte differentiation	150/7182	267/17910	6.68188e-08	1.38916e-06	1.03864e-06	150	FBN1/GLI3/ZEB1/GLI2/STAT5B/MAFB/ROR2/NOTCH2/IL34/TGFBR2/LRRC17/HLX/TGFB1/SFRP1/LOXL3/SOCS5/MITF/PIK3R1/ABL1/GAS6/FCGR2B/CSF1/ZMIZ1/RASSF2/KLF10/ZBTB16/ITPKB/AXL/NME1/PIK3R6/TFE3/ZFP36L1/TAL1/FES/FOXP1/CYLD/CD4/TMEM131L/CD28/ZBTB46/CCL19/NLRP3/GATA2/TLR4/BCL6/DTX1/TESPA1/IL4R/NCKAP1L/MMP14/HCLS1/NFATC2/EVI2B/IL7R/SOS1/CR1/VSIR/CREB1/TREM2/CCR2/RNF41/TNFSF4/TYROBP/CD83/ESRRA/LEF1/LILRB1/EGR3/CD86/Z…	BP
positive regulation of cellular catabolic process	185/7182	341/17910	6.94329e-08	1.44073e-06	1.07719e-06	185	DCN/HTR2A/PRICKLE1/PRKD1/DACT1/DAB2/ECSCR/MSN/STING1/PIP4K2A/MID2/NOD1/FTO/LRP1/CD81/SOCS5/PRKN/FYCO1/LRRK2/RAB12/PINK1/P2RX7/PRXL2C/FBXL5/KDR/IGF1/EPM2A/ARNT/ZBTB20/ABCD2/IL33/RDX/HSPB8/UVRAG/ADRB2/ZFP36L1/TNRC6C/SH3D19/SNX33/TNRC6B/PTEN/ATM/FOXO1/RNF152/SH3GLB1/RNF185/RBM24/VPS13D/BAG2/TRIM22/CLU/TPCN1/FLCN/RAB3GAP1/RNF128/TRIM8/UBQLN2/TSC2/CBFA2T3/EZR/NANOS1/TREM2/ATP5IF1/CHFR/CAMKK2/GPSM1/TP5…	BP
microtubule-based process	316/7182	627/17910	7.03454e-08	1.45687e-06	1.08926e-06	316	PHLDB1/PKD2/MAP1A/MAP7D3/FEZ1/CLIP3/EML1/CEP68/NAV3/TUB/DYNC2H1/CC2D2A/EPHA3/TTBK2/HDGFL3/NCKAP5L/MAP1B/TUBA1A/STARD9/MAP6/BMERB1/SUN2/PKD1/KATNAL1/TRAK2/SPRY1/PHLDB2/ANKRD53/TACC1/CCDC69/ABL1/PURA/FYCO1/CCSER2/CRYAB/FAM107A/MAP4/HOOK3/DIXDC1/MACF1/DLG2/CRMP1/CCDC8/FGF10/TTLL11/FLNA/MAP9/KAT2B/FER/GNAI1/MECP2/MYH9/CHD3/CEP126/JHY/UVRAG/SRGAP2C/CEP120/FES/CYLD/POC1A/PCLAF/PAFAH1B1/NIN/CDK1/DNAL1/T…	BP
neutrophil mediated immunity	258/7182	499/17910	7.09048e-08	1.46564e-06	1.09581e-06	258	TIMP2/PECAM1/RAB31/CRISPLD2/ARSB/PLEKHO2/STOM/CD93/CYB5R3/STING1/ATP8B4/PTPRB/GSN/AP1M1/VPS35L/PRCP/YPEL5/C3/LAIR1/FGL2/DEGS1/VCL/ITGAV/ANO6/NFASC/RAB9B/STK10/RAP1A/GLIPR1/C3AR1/CD14/BST1/VAT1/METTL7A/GYG1/HGSNAT/GMFG/PRSS3/PRAM1/ITGAM/MAN2B1/ADA2/NCKAP1L/CD36/FCN1/HVCN1/CR1/CFP/FCGR2A/TUBB4B/PPIA/SIRPA/SIGLEC9/SYNGR1/ROCK1/TYROBP/BIN2/IDH1/AMPD3/NAPRT/CD59/CFD/CEP290/STBD1/VAMP8/SELL/C5AR1/SIGLE…	BP
T cell differentiation	134/7182	234/17910	7.21026e-08	1.48755e-06	1.1122e-06	134	GLI3/ZEB1/GLI2/STAT5B/RORA/LEPR/MAFB/BCL2/TGFBR2/GPR183/HLX/TGFB1/LOXL3/SOCS5/ABL1/ZMIZ1/CD1D/FZD8/PREX1/ZBTB16/ITPKB/SATB1/PIK3R6/FZD7/ZFP36L1/FOXP1/CYLD/KIT/CD4/TMEM131L/CD28/CCL19/NLRP3/SRF/PPP3CB/BCL6/PIK3CD/DTX1/TESPA1/IL4R/NCKAP1L/NFATC2/IL7R/SOS1/CR1/VSIR/CCR2/TNFSF4/CD83/DLL4/LEF1/CCR7/EGR3/CD86/STAT3/ZBTB1/SPN/JAK3/EOMES/SLAMF6/PRR7/LILRB2/DOCK2/GATA3/PKNOX1/EGR1/LY9/ZC3H12A/MYB/PTPRC/TH…	BP
chondrocyte differentiation	65/7182	97/17910	7.2564e-08	1.49421e-06	1.11718e-06	65	MAF/GREM1/EFEMP1/MEF2C/GLI3/GLI2/ACVRL1/BMPR2/TGFBR2/CCN2/MEF2D/GDF6/TGFB1/SFRP2/PTH1R/WNT2B/FGFR1/CREB3L2/SULF1/ZBTB16/NFIB/RARB/TRPS1/WNT9A/SOX5/POC1A/BMPR1A/SNAI2/TGFBR1/CCN4/BMP6/CYTL1/TGFBI/CHSY1/SNX19/GLG1/SIX2/OSR1/ADAMTS12/CCN3/SERPINH1/ADAMTS7/SOX9/SULF2/PKDCC/NKX3-2/NPPC/SMPD3/BMPR1B/ZNF219/FGF18/RELA/OSR2/MAPK14/HOXA11/CHADL/LOXL2/MSX2/PTHLH/CHST11/SCIN/ECM1/AXIN2/SCX/MDK	BP
positive regulation of vasculature development	133/7182	232/17910	7.37295e-08	1.51532e-06	1.13296e-06	133	TEK/MAP3K3/CD34/AKT3/TNFSF12/VEGFC/RHOJ/ENG/RAMP2/CYP1B1/PRKD1/TBXA2R/PTGIS/CDH5/GREM1/HGF/ACVRL1/NRP1/APLNR/TGFBR2/GAB1/FGF2/SMOC2/FGF1/ABL1/SFRP2/ETS1/THBS1/PRKCB/SRPX2/BMPER/SASH1/KDR/RHOB/ISL1/HDAC7/C3/HSPB6/TMEM100/ITGB1/MYOCD/PIK3R6/PDGFD/RAP1A/AQP1/PPP1R16B/C3AR1/KIT/RRAS/FLT1/NOS3/GATA2/JAK1/CFLAR/CX3CR1/CMA1/AGTR1/ITGA5/CXCR4/PLCG1/PDGFB/ZNF304/TWIST1/STIM1/FOXC2/STAT3/RAPGEF2/C5AR1/MIR1…	BP
gland morphogenesis	75/7182	116/17910	7.42797e-08	1.52372e-06	1.13924e-06	75	GLI1/IGFBP5/TGFB3/AR/HGF/GLI3/GLI2/FGF7/NRP1/CYP7B1/MSN/BCL2/CSF1R/TGFBR2/TGFB1/TWSG1/SFRP1/PGR/LIMS2/FGFR1/CSF1/PTN/FGF10/NTN1/SULF1/NFIB/PLXND1/SNAI2/ESRP2/TNC/ELF3/FEM1B/CFLAR/ID4/NOG/PTCH1/CAV1/SOX9/TBX2/RXRA/SULF2/TNFAIP3/TGM2/TGFB2/SEMA3C/CCL11/BTRC/RPS6KA1/DDR1/SLC9A3R1/SERPINB5/BTBD7/EPHA2/FOXA1/CEACAM1/LAMA5/STAT6/NKX2-3/NTN4/SCRIB/FRS2/PML/CEBPB/POLB/MSX2/EDAR/HOXB13/WNT5A/SEMA3A/AREG/S…	BP
regulation of cartilage development	48/7182	66/17910	7.52752e-08	1.54121e-06	1.15232e-06	48	MAF/GREM1/EFEMP1/GLI3/GLI2/ACVRL1/FRZB/CTSK/BMPR2/CCN2/GDF6/TGFB1/ZBTB16/CCN1/RARB/TRPS1/WNT9A/SOX5/SNAI2/TGFBR1/CCN4/BMP6/GLG1/SIX2/ADAMTS12/BMP1/NOG/ADAMTS7/SOX9/SMAD1/PKDCC/NKX3-2/SMPD3/TAPT1/BMPR1B/ZNF219/FGF18/RELA/HOXA11/CHADL/LOXL2/PTHLH/SCIN/WNT5A/AXIN2/LEP/SCX/MDK	BP
antigen receptor-mediated signaling pathway	129/7182	224/17910	8.0301e-08	1.641e-06	1.22693e-06	129	MEF2C/THY1/CMTM3/BCL2/PRKCH/FYN/CD81/PIK3R1/ABL1/PRKCB/FCGR2B/DUSP3/RFTN1/PDE4B/FOXP1/CYLD/DUSP22/PIK3CA/CD4/PRNP/THEMIS2/PIK3CD/PLCL2/TESPA1/RAB29/NCKAP1L/ELF2/NFATC2/EZR/PAK3/PDE4D/TAB2/PLCG1/CCR7/FYB1/PSME2/GRAP2/WNK1/PSMA5/TRAT1/TRAV29DV5/PSMD14/SKP1/GATA3/FBXW11/TRAC/TRAF6/BTK/PSMB3/TRBV12-3/LCP2/PSMB8/ZC3H12A/LAT2/PTPRC/THEMIS/MNDA/CD3G/MAP3K7/NFAM1/ITK/BTRC/TRBV7-9/TRAV8-4/CACNB3/CD247/FOX…	BP
symbiont process	430/7182	884/17910	8.18626e-08	1.66975e-06	1.24842e-06	430	IL6ST/GUCY1A1/MPDZ/HTR2A/MDFIC/FBLN1/STOM/CD93/NFIA/MXRA8/ADARB1/VIM/BCL2/STING1/CXCL12/MID2/PDGFRA/GSN/TLN1/HCFC2/ATF7/FYN/CD81/TGFB1/AP1M1/PRKN/PIK3R1/CFH/NRP2/GAS6/CRTC3/TRIM23/FCGR2B/CCL2/NLRP1/ELMO1/CRTC1/KDR/ULK2/WASF2/LGALS1/ITGB3/ITSN1/KAT2B/ZYX/ITGAV/SATB1/CREBBP/AXL/ITGB5/PACS1/ITGB1/TSPAN7/UVRAG/ACKR3/TBKBP1/TRIM6/HYAL2/AQP1/IL16/CD4/FN1/KPNA5/RNF216/CDK1/CD28/SELPLG/CAMLG/EPS15/ABI2/A…	BP
regulation of protein stability	152/7182	272/17910	8.67605e-08	1.76631e-06	1.32062e-06	152	PRKD1/CRTAP/DACT1/CREBL2/PLPP3/ATP1B2/ANK2/BCL2/SOX17/GSN/CD81/SMO/PRKN/PIK3R1/TMEM88/HIP1/CRYAB/FAM107A/LRRK2/PINK1/IGF1/RASSF2/FLNA/MOSMO/P3H1/MYLIP/CREBBP/RTN4/GPIHBP1/PRNP/WDR81/AAK1/CAMLG/PTEN/SH3GLB1/BAG2/ATF7IP/CLU/RNF128/MTMR9/CREB1/GNAQ/CHFR/TAF9B/HSPD1/TYROBP/PLK1/ATP1B1/FBXL3/IFT46/USP4/ID1/TRIM44/VPS11/EPHA4/WIZ/USP2/USP27X/TBRG1/SNCA/MORC3/SIRT1/CHP1/USP13/NOP53/PHB/FBXW11/TSPAN1/TBL…	BP
regulation of leukocyte proliferation	124/7182	214/17910	8.84987e-08	1.79831e-06	1.34454e-06	124	LRRC32/IL6ST/GREM1/MEF2C/STAT5B/PDE5A/BCL2/TGFBR2/GPR183/CD81/TGFB1/TWSG1/FCGR2B/TNFSF8/CSF1/CD1D/IGF1/FGF10/GPNMB/CD4/VCAM1/TMEM131L/CD28/TACR1/CCL19/AIF1/PRNP/TLR4/BCL6/ATM/PRKAR1A/CD209/PKN1/NCKAP1L/NFATC2/SOS1/VSIR/CCR2/TNFSF4/VSIG4/TYROBP/LMO1/LILRB1/SPN/TAC1/LST1/TNFSF18/LILRB2/TNFAIP3/PDCD1LG2/AHR/CD276/TRAF6/BTK/CD6/CD40LG/PTPRC/DLG5/MNDA/TNFRSF1B/MAPK8IP1/RASAL3/PNP/FOXP3/TFRC/CD3E/TIRAP…	BP
negative regulation of protein phosphorylation	219/7182	415/17910	8.89717e-08	1.80419e-06	1.34894e-06	219	HEG1/EMILIN1/LDLRAD4/KIRREL1/SLIT2/ENG/DACT1/FBLN1/GREM1/TIMP3/HGF/WWTR1/PLPP3/THY1/ADARB1/RASIP1/ANGPT1/PPM1F/MYADM/LMO3/SMPD1/LATS2/TGFB1/NR2F2/CTDSP2/SPRY1/SFRP1/SH2B3/SOCS5/PRKN/ABL1/SFRP2/GFRA2/DUSP26/LRRK2/PINK1/HIPK3/P2RX7/ILK/DUSP3/NIBAN1/RASSF2/PID1/DMD/TERF2IP/KAT2B/INKA1/RAPGEF1/RGS4/PRKAR2B/PER1/DUSP1/MYOCD/RGS2/HYAL2/CYLD/DUSP22/PAFAH1B1/PBK/GADD45B/PRNP/PRKAG2/TLR4/GMFG/BDKRB1/PTEN/…	BP
nucleobase-containing small molecule metabolic process	366/7182	740/17910	8.91224e-08	1.80419e-06	1.34894e-06	366	PDE1A/GUCY1B1/GUCY1A1/ENTPD1/HTR2A/NPR2/PTGIS/RHOQ/FAM20C/RORA/PDE2A/PDE5A/ADCY4/PDE7B/ADCY9/GIMAP7/NPR1/ADCY5/TGFB1/GUCY1A2/ISCU/AASS/LRRK2/PINK1/P2RX7/DLG2/PRXL2C/GFPT2/IGF1/TPST1/ARNT/ZBTB20/FMO1/PID1/H6PD/PDE8B/MECP2/ACACB/COX5A/NME1/NAGK/PDE4B/AGPAT4/MGAT1/ADCYAP1/RAB23/RNLS/CDK1/NNMT/EXTL2/BST1/CDS2/MOCS1/ATP5MC1/ATP1A2/COX6A1/PRKAG2/NOS3/ADCY2/CDS1/ATP5MC3/CCNB1/PDPR/UQCRH/SLC25A12/ADA2/AD…	BP
neuron projection guidance	123/7182	212/17910	9.01108e-08	1.82078e-06	1.36134e-06	123	CNTN4/LAMA2/PTPRM/BOC/SLIT2/DOK6/FLRT2/DOK5/SLIT3/GLI3/GLI2/FEZ1/NRP1/KLF7/ROBO1/CSF1R/MYH10/CXCL12/SHANK3/BMPR2/LAMB2/LRP1/GAB1/FYN/SCN1B/EVL/PIK3R1/PLXNA4/DPYSL2/NRP2/SEMA6C/GFRA2/MATN2/GFRA1/CRMP1/ISL1/PDLIM7/NTN1/UNC5C/NFIB/NFASC/MYOT/MEGF8/NRXN3/ANOS1/SEMA5B/PIK3CA/CHN1/PIK3CD/DOK2/FEZ2/APBB2/CHL1/SHC1/MYCBP2/CXCR4/SOS1/EZR/PLCG1/NOG/ISL2/NCAM1/PTCH1/ENAH/NR4A3/EPHA4/SEMA5A/EFNB3/SHC3/EPHA7/…	BP
negative regulation of cell death	482/7182	1003/17910	9.07972e-08	1.83122e-06	1.36915e-06	482	TEK/IL6ST/CD34/PDGFRB/MAP3K12/RAMP2/PRKD1/ZFPM2/CD200/SERPINF1/DAB2/TGFB3/NFATC4/GREM1/AR/HGF/MEF2C/GLI3/GLI2/PTGFR/CAMK1D/PEA15/STAT5B/NRP1/KANK2/ANGPT1/FZD1/NOTCH2/BCL2/CSF1R/CXCL12/TWIST2/GNAI2/FLT4/MEIS3/LRP1/PRKCH/FYN/F2R/SMO/FGF2/EDNRB/SFRP1/MITF/PRKN/PIK3R1/ABL1/SFRP2/PDE3A/KLHL20/GAS6/THBS1/CRYAB/LIMS2/LRRK2/SYNGAP1/PINK1/HIPK3/CCL2/CSF1/TMEM109/ILK/KDR/NGF/ISL1/IGF1/FGF10/FLNA/DIPK2A/ITS…	BP
negative regulation of cytoskeleton organization	81/7182	128/17910	9.21816e-08	1.85567e-06	1.38743e-06	81	S1PR1/SLIT2/DLC1/CLIP3/NAV3/TTBK2/HDGFL3/MAP1B/SHANK3/MYADM/ADD1/GSN/BMERB1/PHLDB2/TMOD2/PRKN/TMOD1/WASF2/LMOD1/KAT2B/RDX/ARHGAP6/PLEKHH2/STMN2/SWAP70/TRIOBP/CORO2B/CLASP1/INPP5K/MAP2/ARAP1/FHOD3/APC/ARPIN/BBS4/ARHGEF2/WASHC2C/DYRK1A/TAOK1/SNCA/NEK2/CLASP2/SMAD4/FKBP4/MYOC/KANK1/MDM1/SPTAN1/PICK1/BRCA1/CARMIL1/EML2/CCNF/CIB1/VILL/CKAP2/TACSTD2/PRKCD/HIP1R/TWF2/MTPN/WAS/TMSB4X/TUBB4A/NPM1/SPTBN1/S…	BP
endothelial cell differentiation	69/7182	105/17910	9.48058e-08	1.90494e-06	1.42427e-06	69	S1PR1/HEG1/PECAM1/ENG/S1PR3/CDH5/ZEB1/CLIC4/ACVRL1/NRP1/PDE2A/MSN/SOX17/BMPR2/MYADM/ADD1/NOTCH4/NR2F2/PTN/SOX18/COL18A1/ATOH8/FOXJ2/TMEM100/RAPGEF1/CLDN5/RDX/RAP1A/PPP1R16B/PDPN/ARHGEF26/BMP6/PTPRS/HEY2/VEZF1/CXCR4/EZR/PDE4D/SCUBE1/F11R/ROCK1/TNFRSF1A/ID1/RAPGEF2/RBPJ/DLL1/TJP1/F2RL1/SMAD4/RAPGEF3/S1PR2/BTG1/RAP1B/ACVR1/STC1/CCM2/MARVELD2/CEACAM1/LAMA5/HEY1/IKBKB/KDM6B/EDF1/XDH/NOTCH1/GPX1/TJP2/R…	BP
glomerulus development	45/7182	61/17910	9.51937e-08	1.90918e-06	1.42744e-06	45	TEK/CD34/PECAM1/PDGFRB/TCF21/HEYL/MEF2C/WWTR1/NID1/ANGPT1/BCL2/MAGI2/PDGFRA/LAMB2/NOTCH3/ACTA2/SULF1/PDGFD/GPR4/CFLAR/COL4A4/OSR1/PODXL/PDGFB/NOG/BASP1/FOXC2/COL4A3/SULF2/MTSS1/EGR1/IL6R/MPV17/PLCE1/KLF15/HES1/WT1/ENPEP/ADIPOQ/RET/FOXJ1/IQGAP1/CD24/VANGL2/JAG1	BP
regulation of actomyosin structure organization	63/7182	94/17910	1.13826e-07	2.27863e-06	1.70366e-06	63	S1PR1/DLC1/LPAR1/TGFB3/ARHGEF15/MEF2C/NRP1/PPM1F/CCN2/SH3PXD2B/EVL/SFRP1/PHLDB2/PIK3R1/ABL1/WASF2/NOX4/ASAP3/SORBS3/ARHGAP6/GPR65/TACR1/TGFBR1/TPM1/CORO2B/AKAP13/CLASP1/INPP5K/ARAP1/ROCK1/BBS4/ARHGEF10/LIMCH1/TAC1/RGCC/ARHGEF5/CLASP2/SMAD4/RAPGEF3/MYOC/ECT2/ITGB1BP1/CARMIL1/PTGER4/TACSTD2/WAS/SLC9A1/STMN1/TESK1/RHOA/S100A10/RAC1/PAK1/TSC1/FHOD1/ROCK2/PXN/PPP1R9A/EDN1/ARHGEF10L/EPHA1/NF2/RHOC	BP
cell projection assembly	267/7182	521/17910	1.16298e-07	2.3238e-06	1.73744e-06	267	S1PR1/PMP22/SLIT2/LPAR1/TGFB3/RHOQ/ARHGEF6/WWTR1/PALM/PARVA/NRP1/DPYSL3/DZIP1/DYNC2H1/CC2D2A/TTBK2/TUBA1A/MYH10/FGD5/GSN/DOCK11/EVL/ABL1/ARMC9/MAP4/FGD1/P2RX7/BBS9/SEPTIN7/WASF2/P2RY12/BBOF1/FLNA/NEK1/VCL/NTN1/FER/GALNT11/ANO6/TCTN1/RDX/ASAP1/PRKAR2B/CEP126/JHY/ITGB1/RAB23/PRKACA/SRGAP2C/CEP120/MYLK/PPP1R16B/CYLD/POC1A/ARL6/KIT/PAFAH1B1/CDK1/DNAL1/CCL19/AIF1/GAP43/TGFBR1/ARHGEF26/SRF/TOGARAM1/WDR…	BP
protein localization to organelle	391/7182	798/17910	1.20053e-07	2.39441e-06	1.79023e-06	391	HTR2A/GPC6/PRICKLE1/MDFIC/SYNE1/SYT11/MAP1A/GLIS2/GLI3/NRP1/CEP68/LEPROT/ANGPT1/DZIP1/DYNC2H1/CC2D2A/MSN/ANK2/PKIG/BCL2/TTBK2/NEURL1B/MID2/DCLK2/FYN/SUN2/TOR1AIP1/CD81/SMO/ARL2BP/TXNIP/PYGO1/TGFB1/RIPOR1/RAB8B/PRKN/PIK3R1/SUFU/LRRK2/HOOK3/PINK1/BBS9/DLG2/TINF2/TRAM1L1/APOD/GRIK5/FLNA/TERF2IP/TRAM2/ZBTB16/TCTN1/PACS1/RDX/NGFR/RAP1A/RAB23/RTN4/HYAL2/RAB11FIP3/ARL6/CDK1/CNTLN/RABEP1/TFDP2/CPE/COL1A1…	BP
negative regulation of programmed cell death	443/7182	916/17910	1.22394e-07	2.4366e-06	1.82177e-06	443	TEK/IL6ST/PDGFRB/MAP3K12/RAMP2/DAB2/TGFB3/NFATC4/GREM1/AR/HGF/MEF2C/GLI3/GLI2/PTGFR/CAMK1D/PEA15/STAT5B/NRP1/KANK2/ANGPT1/NOTCH2/BCL2/CSF1R/CXCL12/TWIST2/GNAI2/FLT4/MEIS3/LRP1/PRKCH/FYN/F2R/SMO/EDNRB/SFRP1/MITF/PRKN/PIK3R1/ABL1/SFRP2/PDE3A/KLHL20/GAS6/THBS1/CRYAB/LIMS2/LRRK2/SYNGAP1/PINK1/HIPK3/CCL2/ILK/KDR/NGF/ISL1/IGF1/FGF10/FLNA/DIPK2A/ITSN1/TSC22D3/ITGAV/EPCAM/DSTYK/MECP2/CITED2/CCN1/ITPKB/HS…	BP
regulation of protein binding	125/7182	217/17910	1.24388e-07	2.47172e-06	1.84803e-06	125	PLCL1/DACT1/SPON1/DAB2/NFATC4/MEF2C/NRP1/ANGPT1/DZIP1/BCL2/TTBK2/STING1/ADD1/SMARCD3/LRP1/PKD1/CDON/PRKN/ABL1/LDOC1/HDAC5/LRRK2/TGFBR3/CRMP1/ISL1/GREM2/CCM2L/PRKACA/ADRB2/PLXND1/CYLD/CRBN/TGFBR1/LOX/ITGA4/CRTAC1/CCPG1/NES/PLCL2/BAG2/AIDA/TIAM1/CD36/MAP2/AKTIP/MFNG/PDGFB/NOG/GPSM1/ARRB1/ROCK1/PLK1/AURKB/LEF1/TRAF4/CAV1/ID1/RAPGEF2/CTHRC1/EPHA4/SNAPIN/RIPOR2/ARRB2/HSPA5/HDAC4/CAMK1/PHLDA2/AMFR/PIN1…	BP
urogenital system development	176/7182	324/17910	1.27763e-07	2.53412e-06	1.89469e-06	176	TEK/TNS2/DCN/CD34/PECAM1/PKD2/PDGFRB/SLIT2/GLI1/FBN1/TCF21/HEYL/DCHS1/SERPINF1/KCNJ8/GREM1/AR/GLIS2/MEF2C/GLI3/WWTR1/FAT4/GLI2/NID1/NRP1/CYP7B1/NFIA/KANK2/ANGPT1/FOXF1/BCL2/MAGI2/PBX1/SOX17/PDGFRA/LAMB2/NOTCH3/SMO/PKD1/ADAMTS1/ACTA2/FGF2/TGFB1/FGF1/SPRY1/SFRP1/WNT2B/LRRK2/FGFR1/ILK/BMPER/FGF10/EPCAM/SULF1/COL4A1/ZBTB16/MYOCD/RARB/ARID5B/PDGFD/HYAL2/GPR4/TGFBR1/GATA2/BMP6/TNC/PTEN/LZTS2/FEM1B/PGF/…	BP
positive regulation of leukocyte migration	77/7182	121/17910	1.35032e-07	2.67338e-06	1.99881e-06	77	VEGFC/SELP/IL1R1/CAMK1D/THY1/THBS4/CXCL12/CD99L2/TGFB1/RARRES2/DYSF/GAS6/PLVAP/THBS1/CSF1/PTN/P2RY12/ANO6/PDGFD/C3AR1/TACR1/CCL19/AIF1/ITGA4/BDKRB1/SWAP70/NCKAP1L/MMP14/TREM2/DOCK8/CCR2/TNFSF14/ZNF580/CCR7/CMKLR1/GPSM3/C5AR1/WNK1/SPN/RIPOR2/TNFSF18/CCR1/IL6R/CCL20/F2RL1/C1QBP/S100A14/APP/TIRAP/TMEM102/LGMN/AKIRIN1/SERPINE1/MAPK14/LGALS3/IL6/CXCL17/CCL21/KARS1/PTAFR/STK39/ADAM17/CXCL13/WNT5A/RHOA/…	BP
negative regulation of phosphorylation	236/7182	454/17910	1.44864e-07	2.86279e-06	2.14042e-06	236	HEG1/EMILIN1/LDLRAD4/KIRREL1/SLIT2/ENG/DACT1/FBLN1/GREM1/TIMP3/HGF/WWTR1/PLPP3/THY1/ADARB1/RASIP1/ANGPT1/PPM1F/MYADM/LMO3/SMPD1/LATS2/TGFB1/NR2F2/PIK3IP1/CTDSP2/SPRY1/SFRP1/SH2B3/SOCS5/PRKN/ABL1/SFRP2/GFRA2/DUSP26/LRRK2/PINK1/HIPK3/P2RX7/ILK/DUSP3/NIBAN1/RASSF2/PID1/DMD/TERF2IP/KAT2B/INKA1/RAPGEF1/RGS4/PRKAR2B/PER1/DUSP1/MYOCD/RGS2/HYAL2/CYLD/DUSP22/PAFAH1B1/PBK/GADD45B/PRNP/PRKAG2/TLR4/GMFG/BDKR…	BP
striated muscle tissue development	200/7182	376/17910	1.4919e-07	2.94289e-06	2.20031e-06	200	S1PR1/HEG1/DCN/ELN/PDGFRB/GLI1/TCF21/HEYL/ENG/ZFPM2/MEOX2/GREM1/MEF2C/SGCD/TENM4/MSC/BCL2/SKI/SOX17/MYH10/TGFBR2/PDGFRA/MEIS1/GJA5/MEF2D/SMO/HLX/MEF2A/FGF2/CDON/TGFB1/NR2F2/GJC1/SGCB/TGFBR3/FGFR1/MRTFB/ISL1/IGF1/SLC8A1/FOXP2/PI16/NOX4/DIPK2A/SVIL/VAMP5/ASB2/JPH2/PLN/CCM2L/RGS4/ITGB1/MYOCD/RARB/MAPK11/BVES/FZD7/KCNAB1/RGS2/AKAP6/KCNK2/CDK1/BMPR1A/CFL2/TGFBR1/MYH11/TPM1/SRF/LOX/PTEN/CCNB1/HEY2/COL1…	BP
cell cycle G2/M phase transition	144/7182	257/17910	1.51019e-07	2.97353e-06	2.22322e-06	144	FBXL7/FOXN3/PBX1/TUBA1A/SMARCD3/FHL1/HSPA2/MECP2/PRKAR2B/PPP1R12B/PRKACA/PAFAH1B1/CDK1/HMMR/CCNB1/ATM/PPP1R12A/PKIA/NES/CCNA2/CDC25A/CHMP4C/BRSK1/ACTR1A/CCNB2/PLK4/MELK/CLASP1/TUBB4B/DCTN1/CDK14/DYRK3/PLK1/AURKB/CDC25C/PKMYT1/PSME2/CTC1/CEP290/KIF14/FOXO4/DYNC1H1/PSMA5/TAOK1/PSMD14/ABCB1/SKP1/NEK2/TPX2/NOP53/FBXW11/USP47/DTL/CENPF/CLSPN/MRNIP/PSMB3/AURKA/CCNY/PSMB8/USH1C/YWHAE/BTRC/PLCB1/TUBG1/LA…	BP
regulation of cellular response to growth factor stimulus	153/7182	276/17910	1.5674e-07	3.07994e-06	2.30278e-06	153	ADGRA2/MMRN2/DCN/EMILIN1/LDLRAD4/LTBP1/SLIT2/FBN1/VEGFC/ENG/ZNF423/FZD4/DAB2/TGFB3/DOK5/GREM1/ZEB1/FAM20C/ACVRL1/DKK3/ASPN/FZD1/ROBO1/SKI/BMPR2/TGFBR2/LTBP4/CHRDL1/TGFB1I1/SFRP4/FGF2/SMOC2/TGFB1/TWSG1/FGF1/SPRY1/SFRP1/ABL1/SFRP2/THBS1/NRROS/PRKCB/HTRA1/TGFBR3/FGFR1/HTRA3/ILK/BMPER/ARNT/ITGB3/FGF10/DSTYK/SULF1/CITED2/CCN1/CREBBP/GREM2/PPP2R5B/RBPMS2/MYOCD/TGFBR1/VASN/EPN2/FLT1/LOX/NPTN/GOT1/CFLAR/…	BP
neutrophil degranulation	250/7182	485/17910	1.56994e-07	3.07994e-06	2.30278e-06	250	TIMP2/PECAM1/RAB31/CRISPLD2/ARSB/PLEKHO2/STOM/CD93/CYB5R3/STING1/ATP8B4/PTPRB/GSN/AP1M1/VPS35L/PRCP/YPEL5/C3/LAIR1/FGL2/DEGS1/VCL/ITGAV/ANO6/NFASC/RAB9B/STK10/RAP1A/GLIPR1/C3AR1/CD14/BST1/VAT1/METTL7A/GYG1/HGSNAT/GMFG/PRSS3/PRAM1/ITGAM/MAN2B1/ADA2/NCKAP1L/CD36/FCN1/HVCN1/CR1/CFP/FCGR2A/TUBB4B/PPIA/SIRPA/SIGLEC9/SYNGR1/ROCK1/TYROBP/BIN2/IDH1/AMPD3/NAPRT/CD59/CFD/CEP290/STBD1/VAMP8/SELL/C5AR1/SIGLE…	BP
purine-containing compound metabolic process	284/7182	560/17910	1.58375e-07	3.1014e-06	2.31883e-06	284	PDE1A/GUCY1B1/GUCY1A1/HTR2A/NPR2/RHOQ/FAM20C/RORA/PDE2A/PDE5A/ADCY4/PDE7B/ADCY9/GIMAP7/NPR1/ADCY5/TGFB1/GUCY1A2/ISCU/AASS/LRRK2/PINK1/P2RX7/DLG2/PRXL2C/IGF1/TPST1/ARNT/ZBTB20/PID1/PDE8B/MECP2/ACACB/COX5A/NME1/PDE4B/ADCYAP1/RAB23/CDK1/MOCS1/ATP5MC1/ATP1A2/COX6A1/PRKAG2/NOS3/ADCY2/ATP5MC3/CCNB1/PDPR/UQCRH/SLC25A12/ADA2/OXSM/ELOVL5/FLCN/PDE9A/COX5B/CBFA2T3/ELOVL6/UQCRC1/COA6/TREM2/TSPO/PDE4D/ELOVL4/…	BP
brain development	344/7182	694/17910	1.65333e-07	3.23179e-06	2.41632e-06	344	ZEB2/SEPTIN4/S1PR1/CNTN4/GNB4/AKT3/SLIT2/GLI1/POU6F1/DLC1/PCDH18/FZD4/LPAR1/GLI3/FAT4/GLI2/PRKG1/FEZ1/RORA/LHX6/RBFOX2/NRP1/EML1/MAFB/DYNC2H1/FZD1/BCL2/TTBK2/ROBO1/ATXN1/HSPG2/SKI/CSF1R/MYH10/CXCL12/SHANK3/BMPR2/TGFBR2/NOTCH3/LRP1/NUMBL/GNAO1/BMERB1/DCLK2/EZH1/FYN/SUN2/SMO/ALDH1A3/CDON/NR2F2/TWSG1/MDGA1/SFRP1/SHROOM4/ABL1/PLXNA4/SFRP2/DPYSL2/NRP2/ETS1/WLS/WNT2B/LAMB1/LRRK2/HOOK3/DIXDC1/FGFR1/TSPA…	BP
T cell proliferation	105/7182	177/17910	1.68381e-07	3.28541e-06	2.4564e-06	105	LRRC32/IL6ST/STAT5B/PDE5A/MSN/TGFBR2/FYN/CD81/TGFB1/TWSG1/ABL1/P2RX7/TNFSF8/CD1D/IGF1/SATB1/GPNMB/CD4/VCAM1/TMEM131L/CD28/CCL19/AIF1/PRNP/PPP3CB/PRKAR1A/CD209/GJA1/NCKAP1L/SOS1/VSIR/DOCK8/CCR2/TNFSF4/VSIG4/TNFSF14/LMO1/LILRB1/SPN/TNFSF18/LILRB2/DOCK2/PDCD1LG2/CD276/TRAF6/CD6/CD40LG/PTPRC/DLG5/TNFRSF1B/MAPK8IP1/RASAL3/PNP/FOXP3/TFRC/CD3E/ZAP70/HAVCR2/CD151/HHLA2/CD46/HES1/NCK1/SH3RF1/TNFSF13B/SASH…	BP
negative regulation of mitotic cell cycle	168/7182	308/17910	1.70419e-07	3.31917e-06	2.48164e-06	168	FBXL7/TIMP2/PKD2/DACT1/FOXN3/KANK2/BCL2/MAGI2/PRMT2/TGFB1/CTDSP2/ABL1/GAS1/FAM107A/CCL2/SEPTIN7/FHL1/FAP/GPNMB/ZWINT/DUSP1/NACC2/ZFP36L1/WNT9A/FBXO31/CDK1/HECA/MAP3K20/TFDP2/SETMAR/BCL6/PTEN/CCNB1/ATM/MAD2L1/RBL2/SLFN11/XPC/CHMP4C/BRSK1/PCNA/CDC20/CDKN1B/APC/CHFR/ANGEL2/PLK1/BUB1/AURKB/CDC25C/EZH2/PSME2/BUB1B/FOXO4/CDT1/CTDSP1/PSMA5/BTG2/RGCC/E2F8/SFN/TAOK1/PSMD14/TOM1L2/TTK/TNKS1BP1/ATRX/CNOT6L/…	BP
ribonucleotide metabolic process	263/7182	514/17910	1.71939e-07	3.34275e-06	2.49927e-06	263	PDE1A/GUCY1B1/GUCY1A1/HTR2A/NPR2/RHOQ/FAM20C/RORA/PDE2A/PDE5A/ADCY4/PDE7B/ADCY9/GIMAP7/NPR1/ADCY5/TGFB1/GUCY1A2/ISCU/AASS/LRRK2/PINK1/P2RX7/DLG2/PRXL2C/IGF1/TPST1/ARNT/ZBTB20/PID1/PDE8B/MECP2/ACACB/COX5A/NME1/PDE4B/ADCYAP1/RAB23/CDK1/MOCS1/ATP5MC1/ATP1A2/COX6A1/PRKAG2/ADCY2/ATP5MC3/CCNB1/PDPR/UQCRH/SLC25A12/OXSM/ELOVL5/FLCN/PDE9A/COX5B/CBFA2T3/ELOVL6/UQCRC1/COA6/TREM2/TSPO/PDE4D/ELOVL4/HACD1/ADCY…	BP
regulation of extrinsic apoptotic signaling pathway	92/7182	151/17910	1.73976e-07	3.37626e-06	2.52433e-06	92	TNFSF12/TIMP3/AR/HGF/PEA15/NRP1/SRPX/BCL2/FYN/SFRP1/SFRP2/THBS1/FGFR1/IGF1/FGF10/DAPK3/ITGAV/HYAL2/CYLD/SNAI2/TGFBR1/NOS3/PTEN/PELI3/FEM1B/ITPRIP/CFLAR/ZMYND11/TRAF1/MAP2K5/ARHGEF2/CAV1/INHBA/TNFAIP3/HMGB2/MAPK7/PTPRC/MCL1/YAP1/PDIA3/ACVR1/AGT/BMPR1B/PMAIP1/FAIM2/WWOX/TMC8/ITM2C/BRCA1/SH3RF1/SP100/ITGA6/FAS/RELA/PPP1CA/RIPK1/SCG2/SERPINE1/BID/MADD/LGALS3/TMBIM1/RET/BCL10/PML/HTRA2/SKIL/GPX1/RB1CC…	BP
nucleotide metabolic process	326/7182	654/17910	1.75398e-07	3.39775e-06	2.5404e-06	326	PDE1A/GUCY1B1/GUCY1A1/HTR2A/NPR2/PTGIS/RHOQ/FAM20C/RORA/PDE2A/PDE5A/ADCY4/PDE7B/ADCY9/GIMAP7/NPR1/ADCY5/TGFB1/GUCY1A2/ISCU/AASS/LRRK2/PINK1/P2RX7/DLG2/PRXL2C/IGF1/TPST1/ARNT/ZBTB20/FMO1/PID1/H6PD/PDE8B/MECP2/ACACB/COX5A/NME1/PDE4B/AGPAT4/ADCYAP1/RAB23/RNLS/CDK1/NNMT/BST1/CDS2/MOCS1/ATP5MC1/ATP1A2/COX6A1/PRKAG2/NOS3/ADCY2/CDS1/ATP5MC3/CCNB1/PDPR/UQCRH/SLC25A12/OXSM/ELOVL5/FLCN/PDE9A/COX5B/CBFA2T3/…	BP
nucleoside phosphate metabolic process	330/7182	663/17910	1.77098e-07	3.42453e-06	2.56042e-06	330	PDE1A/GUCY1B1/GUCY1A1/HTR2A/NPR2/PTGIS/RHOQ/FAM20C/RORA/PDE2A/PDE5A/ADCY4/PDE7B/ADCY9/GIMAP7/NPR1/ADCY5/TGFB1/GUCY1A2/ISCU/AASS/LRRK2/PINK1/P2RX7/DLG2/PRXL2C/IGF1/TPST1/ARNT/ZBTB20/FMO1/PID1/H6PD/PDE8B/MECP2/ACACB/COX5A/NME1/PDE4B/AGPAT4/ADCYAP1/RAB23/RNLS/CDK1/NNMT/BST1/CDS2/MOCS1/ATP5MC1/ATP1A2/COX6A1/PRKAG2/NOS3/ADCY2/CDS1/ATP5MC3/CCNB1/PDPR/UQCRH/SLC25A12/OXSM/ELOVL5/FLCN/PDE9A/COX5B/CBFA2T3/…	BP
organelle localization	312/7182	623/17910	1.84557e-07	3.56237e-06	2.66348e-06	312	HTR2A/NLGN2/BACE1/FEZ1/SYNDIG1/F8/GEM/CC2D2A/FOXF1/MAGI2/TTBK2/NLGN3/MAP1B/TUBA1A/MYH10/MAP6/SUN2/MEF2A/TRAK2/SPRY1/RIPOR1/ANKRD53/PIP5K1C/PRKN/PCDH17/FYCO1/MAP4/LRRK2/PRKCB/HOOK3/PINK1/VAMP2/P2RX7/GRIK5/CACNB2/FGF10/MYO5A/NTN1/MILR1/KCNB1/MYH9/TCTN1/NCS1/PRKAR2B/SEC23A/BVES/UVRAG/RAP1A/PRKACA/CEP120/CHRM2/FES/ARL6/PLEKHM2/KIT/PAFAH1B1/NIN/CDK1/SEC31A/GATA2/SV2A/ITGA4/CROCC/PTEN/CCNB1/AP1M2/ATM/P…	BP
cellular response to peptide	194/7182	364/17910	1.8941e-07	3.64953e-06	2.72865e-06	194	FBN1/RAB31/BACE1/RHOQ/GLP2R/STAT5B/LEPROT/VIM/ADCY4/SESN3/MAP1B/NOD1/ADCY9/GNAI2/GHR/LRP1/GAB1/FYN/ADCY5/TGFB1/RARRES2/PIK3R1/LDOC1/KLF11/HDAC5/PRKCB/ATP6V1G2/VAMP2/FCGR2B/IGF1/PRKACB/SORBS1/KLF10/PID1/KAT2B/MYO5A/FER/PRKAR2B/SOGA1/NGFR/PRKACA/ADRB2/ZFP36L1/KL/MBD5/BCL2L2/PIK3CA/VCAM1/GPR173/PRNP/CACNA2D1/TLR4/ITGA4/ADCY2/PTEN/FOXO1/PRKAR1A/GOT1/CCNA2/CFLAR/AKR1B1/SLC2A4/STAT5A/AGTR1/SHC1/CD36/TS…	BP
axon guidance	121/7182	210/17910	1.92695e-07	3.70621e-06	2.77103e-06	121	CNTN4/LAMA2/PTPRM/BOC/SLIT2/DOK6/FLRT2/DOK5/SLIT3/GLI3/GLI2/FEZ1/NRP1/KLF7/ROBO1/CSF1R/MYH10/CXCL12/SHANK3/BMPR2/LAMB2/LRP1/GAB1/FYN/SCN1B/EVL/PIK3R1/PLXNA4/DPYSL2/NRP2/SEMA6C/GFRA2/MATN2/GFRA1/CRMP1/ISL1/PDLIM7/NTN1/UNC5C/NFIB/NFASC/MYOT/MEGF8/NRXN3/ANOS1/PIK3CA/CHN1/PIK3CD/DOK2/FEZ2/APBB2/CHL1/SHC1/MYCBP2/CXCR4/SOS1/EZR/PLCG1/NOG/ISL2/NCAM1/PTCH1/ENAH/NR4A3/EPHA4/SEMA5A/EFNB3/SHC3/EPHA7/GATA3/R…	BP
microtubule cytoskeleton organization involved in mitosis	74/7182	116/17910	2.03558e-07	3.90818e-06	2.92203e-06	74	EML1/SUN2/PKD1/SPRY1/ANKRD53/TACC1/MAP4/FGF10/FLNA/MAP9/GNAI1/MECP2/CEP126/POC1A/PAFAH1B1/CCNB1/MAD2L1/CHMP4C/SAPCD2/CENPA/SPC25/CLASP1/CDC20/DCTN1/PLK1/RCC1/ARHGEF2/AURKB/NUMA1/ARHGEF10/NUSAP1/DYNC1H1/KIF11/KIF4A/TTK/KIF23/ESPL1/TPX2/CLASP2/RACGAP1/STIL/MYBL2/KIFC1/CENPE/NDC80/STAG1/BCCIP/WDR62/PRC1/RAN/TACC3/BORA/CHMP1B/NDE1/PSRC1/RAB11A/SETD2/TNKS/CHEK2/TACC2/MISP/SPDL1/SBDS/STMN1/RHOA/CHMP5/C…	BP
granulocyte activation	259/7182	506/17910	2.04819e-07	3.9254e-06	2.93491e-06	259	TIMP2/PECAM1/RAB31/CRISPLD2/ARSB/PLEKHO2/STOM/CD93/CYB5R3/STING1/ATP8B4/PTPRB/GSN/AP1M1/VPS35L/PRCP/YPEL5/VAMP2/FCGR2B/PREX1/C3/LAIR1/FGL2/DEGS1/VCL/ITGAV/ANO6/NFASC/RAB9B/STK10/RAP1A/GLIPR1/C3AR1/CD14/BST1/VAT1/METTL7A/GYG1/HGSNAT/GMFG/PRSS3/PRAM1/ITGAM/MAN2B1/ADA2/NCKAP1L/CD36/FCN1/HVCN1/CR1/CFP/FCGR2A/TUBB4B/CCR2/PPIA/SIRPA/SIGLEC9/SYNGR1/ROCK1/TYROBP/BIN2/IDH1/AMPD3/NAPRT/CD59/CFD/CEP290/STBD…	BP
plasma membrane bounded cell projection assembly	263/7182	515/17910	2.13009e-07	4.07511e-06	3.04684e-06	263	S1PR1/PMP22/SLIT2/LPAR1/TGFB3/RHOQ/ARHGEF6/WWTR1/PALM/PARVA/NRP1/DPYSL3/DZIP1/DYNC2H1/CC2D2A/TTBK2/TUBA1A/MYH10/FGD5/GSN/DOCK11/EVL/ABL1/ARMC9/MAP4/FGD1/P2RX7/BBS9/SEPTIN7/WASF2/P2RY12/BBOF1/FLNA/NEK1/VCL/NTN1/FER/GALNT11/ANO6/TCTN1/RDX/ASAP1/PRKAR2B/CEP126/JHY/ITGB1/RAB23/PRKACA/SRGAP2C/CEP120/MYLK/PPP1R16B/CYLD/POC1A/ARL6/KIT/PAFAH1B1/CDK1/DNAL1/CCL19/AIF1/GAP43/TGFBR1/ARHGEF26/SRF/TOGARAM1/WDR…	BP
positive regulation of JUN kinase activity	50/7182	71/17910	2.16088e-07	4.1267e-06	3.08542e-06	50	ZEB2/MAP3K12/MDFIC/FZD4/ROR2/NRK/SASH1/FZD8/CCL19/MAP3K20/FGD2/PKN1/TIAM1/MAP3K21/MAP3K6/EPHA4/MAP2K7/TAOK1/ARHGEF5/DUSP19/TRAF6/MAP3K2/TLR6/MAP4K5/DVL2/CD40LG/MAP3K7/MAP3K9/DVL3/TNFRSF11A/TNFSF11/MUL1/RIPK1/MAP3K10/PTPN1/HACD3/MAPK8IP3/MAP3K4/MAP3K13/MAP4K2/FZD5/WNT5A/AGER/DBNL/PAK1/TRAF2/RIPK2/EDN1/ERN2/VANGL2	BP
negative regulation of supramolecular fiber organization	77/7182	122/17910	2.22774e-07	4.24687e-06	3.17526e-06	77	S1PR1/EMILIN1/SLIT2/DLC1/CLIP3/NAV3/TTBK2/HDGFL3/MAP1B/SHANK3/MYADM/ADD1/GSN/BMERB1/PHLDB2/TMOD2/PRKN/TMOD1/CRYAB/WASF2/LMOD1/RDX/ARHGAP6/PLEKHH2/STMN2/SWAP70/CLU/TRIOBP/CORO2B/CLASP1/INPP5K/MAP2/ARAP1/FHOD3/APC/ARPIN/BBS4/ARHGEF2/WASHC2C/DYRK1A/TAOK1/SNCA/CLASP2/SMAD4/FKBP4/MYOC/KANK1/SPTAN1/PICK1/CARMIL1/EML2/CIB1/CHADL/VILL/CKAP2/TACSTD2/PRKCD/HIP1R/TWF2/MTPN/WAS/TMSB4X/TUBB4A/SPTBN1/APOE/STMN…	BP
negative regulation of cell adhesion	150/7182	271/17910	2.34237e-07	4.45753e-06	3.33277e-06	150	LRRC32/JAM2/CYP1B1/DLC1/FBLN1/FZD4/GLI3/PRKG1/ACVRL1/ANGPT1/PDE5A/PPM1F/CXCL12/MYADM/LRP1/HLX/TGFB1/TWSG1/PHLDB2/LOXL3/SH2B3/SOCS5/PIK3R1/ABL1/THBS1/FAM107A/FCGR2B/DUSP3/APOD/LGALS1/EPCAM/C1QTNF1/CCM2L/GPNMB/RDX/DUSP1/ARHGAP6/FZD7/DUSP22/SPOCK1/TMEM131L/SIPA1/SERPINE2/SNAI2/PRNP/TNC/BCL6/COL1A1/PTEN/DTX1/TGFBI/SWAP70/PRKAR1A/CORO1C/IL4R/CDH13/MMP14/CORO2B/PODXL/VSIR/TNFSF4/VSIG4/MAP2K5/CDH1/LILRB…	BP
transforming growth factor beta receptor signaling pathway	108/7182	184/17910	2.40471e-07	4.5681e-06	3.41543e-06	108	LRRC32/EMILIN1/LDLRAD4/LTBP1/FBN1/ENG/LTBP2/DAB2/TGFB3/CDH5/ZEB1/ACVRL1/DKK3/ASPN/SKI/FERMT2/TGFBR2/LTBP4/TGFB1I1/TGFB1/TWSG1/THBS1/NRROS/HTRA1/TGFBR3/HTRA3/COL1A2/COL3A1/ZYX/CITED2/CREBBP/CLDN5/ITGB5/MYOCD/SMAD9/TGFBR1/VASN/LOX/GDF10/GOT1/GLG1/FLCN/SMAD5/CREB1/PPM1A/ZFYVE9/F11R/FMOD/CAV1/ID1/ITGA8/ADAMTSL2/BCL9L/ARRB2/JUN/HSPA5/LRG1/SMAD1/SIRT1/FAM89B/SMAD4/PIN1/CDKN1C/TGFB2/GIPC1/SMURF2/MAP3K7/…	BP
positive regulation of cell morphogenesis involved in differentiation	85/7182	138/17910	2.57445e-07	4.87338e-06	3.64369e-06	85	ZEB2/SLIT2/ISLR2/NRP1/ROBO1/MAP1B/CXCL12/BMPR2/MYADM/LRP1/ABL1/MACF1/ILK/NGF/PREX1/FLNA/NTN1/MEGF8/NGFR/AMIGO1/FBXO31/FN1/PAFAH1B1/NIN/SRF/RUFY3/DOCK1/TRIOBP/TIAM1/MAPT/CASS4/PAK3/BHLHB9/DBN1/PTPRD/EPHA4/RAB21/LIMS1/SEMA5A/NEDD9/ITPKA/FBXW8/NDEL1/C1QBP/MYOC/OBSL1/HAS2/TRPV2/ARHGEF7/EEF2K/NEFL/RND2/CARMIL1/CIB1/KALRN/TWF2/CUX1/CAPRIN2/RAB11A/MAP3K13/PARP6/DHX36/LRP8/SKIL/SHTN1/DNM2/DOCK5/RELN/EFNA…	BP
phosphatidylinositol 3-kinase signaling	85/7182	138/17910	2.57445e-07	4.87338e-06	3.64369e-06	85	TEK/DCN/PREX2/PDGFRB/SELP/HTR2A/HGF/PEAR1/ANGPT1/PIP4K2A/PDGFRA/GAB1/FYN/F2R/PIK3IP1/PIP5K1C/PIK3R1/FGFR1/KDR/IGF1/DIPK2A/PPP2R5B/PIK3R5/ZFP36L1/PPP1R16B/KIT/PIK3CA/CD28/SERPINE2/FLT1/HTR2B/PTEN/PIK3CD/PTPN13/HCLS1/TSC2/NEDD4/PDGFB/CEP55/SIRT2/TWIST1/PIP4K2B/FBXL2/HCST/SOX9/PIP5K1B/IRS1/FGR/SIRT1/NLRC3/NOP53/GATA3/F2RL1/CAT/C1QBP/ERBB3/MYOC/TGFB2/AGT/SLC9A3R1/CBL/MAPK1/CEACAM1/PIK3CG/MIR126/PPP2R…	BP
epithelial to mesenchymal transition	86/7182	140/17910	2.60033e-07	4.91376e-06	3.67388e-06	86	PHLDB1/LDLRAD4/HEYL/ENG/DAB2/TGFB3/GREM1/HGF/WWTR1/GLIPR2/EPHA3/TGFBR2/TGFB1I1/TGFB1/SPRY1/SFRP1/PHLDB2/LOXL3/DACT3/SFRP2/TGFBR3/RFLNB/ISL1/TMEM100/RTN4/OLFM1/SNAI2/TGFBR1/VASN/PDPN/MCRIP1/COL1A1/PTEN/HEY2/OVOL2/FOXF2/TIAM1/CLASP1/NOG/DDX17/TWIST1/LEF1/EZH2/AKNA/SOX9/BCL9L/EOMES/RGCC/RBPJ/FUZ/POFUT2/SNAI1/DDX5/CLASP2/SMAD4/PDCD6/FAM83D/DLG5/TGFB2/ACVR1/HAS2/SMAD7/WNT2/TRIM62/PEF1/FOXA1/HEY1/LOXL2…	BP
cell-cell signaling	698/7182	1510/17910	2.62883e-07	4.95892e-06	3.70764e-06	698	RECK/ZEB2/RBMS3/ADGRA2/TEK/SYNPO/HIC1/CNTN4/GUCY1A1/LAMA2/CD34/BICC1/PKD2/PTGIR/PMP22/GLI1/SCN4B/ITPR1/CDH11/HTR2A/DLG4/GPC6/PRICKLE1/MDFIC/PLCL1/DACT1/NLGN2/SYT11/FZD4/DAB2/DHH/MAP1A/LZTS1/BACE1/NFATC4/GREM1/STAB1/MCC/PCDHB4/AR/HGF/MEF2C/GLI3/IGFBP4/WWTR1/GLI2/NRXN2/PLPP3/FGF7/RSPO3/GJA4/DAAM2/THY1/FRZB/NRP1/DKK3/ADARB1/KLF7/ROR2/ANK2/FZD1/CALCOCO1/ANKRD6/PDE7B/MAGI2/NLGN3/SKI/FERMT2/MAP1B/SOX17…	BP
leukocyte mediated immunity	396/7182	814/17910	2.64892e-07	4.9881e-06	3.72946e-06	396	C1S/C1R/TIMP2/PECAM1/SERPING1/IL1R1/RAB31/CRISPLD2/ARSB/PLEKHO2/STOM/C1RL/STAT5B/CD93/C4A/FOXF1/CYB5R3/C7/STING1/ATP8B4/PTPRB/GSN/CD81/TGFB1/C4B/AP1M1/VPS35L/PRCP/YPEL5/VAMP2/P2RX7/FCGR2B/C3/LAIR1/RFTN1/SPON2/FGL2/DEGS1/VCL/ITGAV/MILR1/ANO6/NFASC/RAB9B/STK10/PIK3R6/RAP1A/GLIPR1/FES/LYST/C3AR1/DUSP22/KIT/CD14/CD28/BST1/VAT1/METTL7A/GYG1/NLRP3/GATA2/PPP3CB/TLR4/BCL6/HGSNAT/GMFG/PRSS3/PRAM1/ITGAM/PI…	BP
establishment of organelle localization	232/7182	448/17910	2.72219e-07	5.11714e-06	3.82594e-06	232	HTR2A/BACE1/FEZ1/F8/GEM/FOXF1/MAP1B/MYH10/SUN2/TRAK2/SPRY1/RIPOR1/ANKRD53/PIP5K1C/PRKN/FYCO1/MAP4/LRRK2/PRKCB/HOOK3/PINK1/VAMP2/P2RX7/GRIK5/CACNB2/FGF10/MYO5A/NTN1/MILR1/MYH9/NCS1/SEC23A/RAP1A/CEP120/CHRM2/FES/ARL6/KIT/PAFAH1B1/SEC31A/GATA2/SV2A/ITGA4/CROCC/CCNB1/AP1M2/ATM/PIK3CD/MAD2L1/KIF3C/SYNJ1/DYNC1I1/CDCA8/CHMP4C/IL4R/CD84/SLC2A4/SAPCD2/RAB3GAP1/CENPA/MAPT/CLASP1/CNR1/MAP2/EZR/DLGAP5/MARK1/…	BP
G2/M transition of mitotic cell cycle	134/7182	238/17910	2.77336e-07	5.20427e-06	3.89108e-06	134	FBXL7/FOXN3/PBX1/TUBA1A/SMARCD3/FHL1/HSPA2/MECP2/PRKAR2B/PPP1R12B/PRKACA/PAFAH1B1/CDK1/HMMR/CCNB1/ATM/PPP1R12A/PKIA/NES/CCNA2/CDC25A/CHMP4C/BRSK1/ACTR1A/CCNB2/PLK4/MELK/CLASP1/TUBB4B/DCTN1/CDK14/PLK1/AURKB/CDC25C/PKMYT1/PSME2/CTC1/CEP290/KIF14/FOXO4/DYNC1H1/PSMA5/TAOK1/PSMD14/ABCB1/SKP1/NEK2/TPX2/NOP53/FBXW11/USP47/DTL/CENPF/CLSPN/MRNIP/PSMB3/AURKA/CCNY/PSMB8/USH1C/YWHAE/BTRC/PLCB1/TUBG1/LATS1/AR…	BP
chromatin organization	355/7182	722/17910	2.97071e-07	5.56492e-06	4.16073e-06	355	NAP1L3/NR3C1/MAP3K12/PRKD1/APBB1/EID1/PPM1F/CBX7/SKI/PHF21A/USP51/PRMT2/CBX6/SMARCD3/NAP1L5/PRDM6/PHC1/EZH1/TGFB1/NAP1L2/TCF7L1/PHF1/HDAC5/LRRK2/PRKCB/PINK1/SAP30L/PRDM5/JDP2/PRDM2/ISL1/HDAC7/SCMH1/DAPK3/L3MBTL3/KAT2B/NCOA1/MECP2/SATB1/CREBBP/TSPYL2/CHD3/EPC2/PER1/NACC2/MYOCD/TAL1/LDB1/CDK1/TSPYL4/CHD9/SNAI2/ING4/SETMAR/GATA2/BCL6/SMARCA1/CCNB1/ATM/SETD7/RBL2/PHF2/PKN1/CCNA2/TSPY26P/CENPX/ATF7IP/…	BP
neutrophil activation involved in immune response	250/7182	488/17910	3.03473e-07	5.67499e-06	4.24302e-06	250	TIMP2/PECAM1/RAB31/CRISPLD2/ARSB/PLEKHO2/STOM/CD93/CYB5R3/STING1/ATP8B4/PTPRB/GSN/AP1M1/VPS35L/PRCP/YPEL5/C3/LAIR1/FGL2/DEGS1/VCL/ITGAV/ANO6/NFASC/RAB9B/STK10/RAP1A/GLIPR1/C3AR1/CD14/BST1/VAT1/METTL7A/GYG1/HGSNAT/GMFG/PRSS3/PRAM1/ITGAM/MAN2B1/ADA2/NCKAP1L/CD36/FCN1/HVCN1/CR1/CFP/FCGR2A/TUBB4B/PPIA/SIRPA/SIGLEC9/SYNGR1/ROCK1/TYROBP/BIN2/IDH1/AMPD3/NAPRT/CD59/CFD/CEP290/STBD1/VAMP8/SELL/C5AR1/SIGLE…	BP
I-kappaB kinase/NF-kappaB signaling	141/7182	253/17910	3.10987e-07	5.80545e-06	4.34056e-06	141	MAP3K3/PRKD1/LPAR1/LURAP1/RORA/ANGPT1/MID2/NOD1/FYN/F2R/PRKN/ABL1/WLS/PRKCB/PINK1/ROR1/TLR7/LGALS1/FLNA/TERF2IP/ZDHHC17/LY96/CARD8/PER1/CD14/CD4/CCL19/MAPKBP1/TLR4/MAP3K14/HTR2B/ERC1/NKIRAS1/GJA1/CFLAR/TRIM22/CX3CR1/TRIM8/CD36/ZMYND11/AKAP13/PPM1A/S100B/TAB2/TRIM38/AZI2/LITAF/SIRPA/ROCK1/PRKCE/TNFRSF1A/CCR7/NFKBIA/ASH1L/APOL3/SNIP1/SIRT1/NDFIP2/NLRC3/TNFAIP3/JMJD8/AVPR2/IRAK4/TRAF6/F2RL1/BTK/TMEM…	BP
cellular response to hormone stimulus	321/7182	646/17910	3.18725e-07	5.93962e-06	4.44088e-06	321	IGFBP7/PLPP1/NR3C1/NR2F1/RAMP3/SLIT2/FBN1/TCF21/HEYL/RAB31/SERPINF1/DAB2/RHOQ/AR/SLIT3/MEF2C/GLP2R/PTGFR/ZNF366/STAT5B/RORA/LEPR/RBFOX2/CYP7B1/LEPROT/KANK2/CREBRF/MSN/CALCOCO1/ADCY4/KLF9/SESN3/MAP1B/ADCY9/GNAI2/PRMT2/GHR/TGFB1I1/GAB1/FYN/LMO3/LATS2/ADCY5/LBH/TGFB1/RARRES2/NR2F2/SFRP1/PIK3R1/PRCP/PGR/FAM107A/HDAC5/PRKCB/ATP6V1G2/VAMP2/CACNA1H/CRY2/ISL1/ATP2B4/FBXO32/PRKACB/SORBS1/PID1/KAT2B/MYO5A/…	BP
regulation of canonical Wnt signaling pathway	146/7182	264/17910	3.61387e-07	6.72304e-06	5.02662e-06	146	RECK/RBMS3/ADGRA2/BICC1/GLI1/PRICKLE1/DACT1/DAB2/GREM1/MCC/GLI3/IGFBP4/WWTR1/DAAM2/FRZB/DKK3/ROR2/FZD1/SOX17/SFRP4/LATS2/RSPO1/SFRP1/PRKN/DACT3/SFRP2/RNF146/WLS/TMEM88/LRRK2/ILK/ISL1/FGF10/TMEM170B/DAPK3/RAPGEF1/FZD7/CYLD/TMEM131L/IGFBP6/SNAI2/TNN/COL1A1/FOXO1/LZTS2/GSKIP/PPM1A/GNAQ/APC/NOG/CDK14/TLE2/CAV1/PSME2/WNK1/SOX9/CTHRC1/USP34/PSMA5/TNKS2/LRRK1/RBPJ/FUZ/SOX10/PSMD14/SEMA5A/SOX7/SULF2/EGR1…	BP
homeostasis of number of cells	135/7182	241/17910	3.72182e-07	6.91194e-06	5.16786e-06	135	JAM3/AKT3/MEF2C/STAT5B/RBFOX2/MAFB/BCL2/ADD1/EPAS1/GPR183/DOCK11/F2R/SMO/ADGRF5/TGFB1/SH2B3/ABL1/ETS1/TGFBR3/P2RX7/CSF1/ARNT/RASSF2/L3MBTL3/TSC22D3/ITPKB/DOCK10/AXL/PDE4B/ZFP36L1/TAL1/CCR4/LDB1/CYLD/KIT/MERTK/SRF/NOS3/GATA2/PPP3CB/BCL6/PIK3CD/PKN1/NFE2L1/NCKAP1L/CCNB2/HCLS1/SMAD5/IL7R/SOS1/HOXA5/ACVR2A/CCN3/IKZF1/CCR2/KLF13/ATP5IF1/ARID4A/TNFSF14/DYRK3/LMO1/AMPD3/CCR7/EZH2/STAT3/ZFP36/JAK3/SOX9/S…	BP
ribose phosphate metabolic process	269/7182	531/17910	3.77359e-07	6.99606e-06	5.23075e-06	269	PDE1A/GUCY1B1/GUCY1A1/HTR2A/NPR2/RHOQ/FAM20C/RORA/PDE2A/PDE5A/ADCY4/PDE7B/ADCY9/GIMAP7/NPR1/ADCY5/TGFB1/GUCY1A2/ISCU/AASS/LRRK2/PINK1/P2RX7/DLG2/PRXL2C/IGF1/TPST1/ARNT/ZBTB20/PID1/H6PD/PDE8B/MECP2/ACACB/COX5A/NME1/PDE4B/ADCYAP1/RAB23/CDK1/MOCS1/ATP5MC1/ATP1A2/COX6A1/PRKAG2/ADCY2/ATP5MC3/CCNB1/PDPR/UQCRH/SLC25A12/OXSM/ELOVL5/FLCN/PDE9A/COX5B/CBFA2T3/ELOVL6/UQCRC1/TALDO1/COA6/TREM2/TSPO/PDE4D/ELOVL…	BP
positive regulation of endothelial cell migration	80/7182	129/17910	3.82351e-07	7.07645e-06	5.29086e-06	80	ADGRA2/TEK/MAP3K3/AKT3/VEGFC/RHOJ/PRKD1/PLPP3/NRP1/ANGPT1/BMPR2/SPARC/FLT4/AMOTL1/FGF2/SMOC2/TGFB1/FGF1/ABL1/NRP2/ETS1/THBS1/SRPX2/FGFR1/SASH1/KDR/RHOB/HDAC7/ITGB3/ATOH8/FOXP1/NOS3/GATA2/STAT5A/PLCG1/PDGFB/ZNF580/FOXC2/ATP5F1B/SEMA5A/SIRT1/JCAD/GATA3/PDCD6/AAMP/ZC3H12A/AGT/ANXA3/MIR10B/PIK3C2A/ITGB1BP1/FGF18/LGMN/CIB1/ATP5F1A/PDPK1/MIR132/MIR126/PRKCA/FGFBP1/TMSB4X/HIF1A/MIR27B/GPI/MIR23B/ADAM17/…	BP
canonical Wnt signaling pathway	168/7182	311/17910	3.95761e-07	7.3121e-06	5.46704e-06	168	RECK/RBMS3/ADGRA2/BICC1/GLI1/PRICKLE1/DACT1/FZD4/DAB2/GREM1/MCC/GLI3/IGFBP4/WWTR1/PLPP3/DAAM2/FRZB/DKK3/ROR2/FZD1/SOX17/SFRP4/LATS2/PYGO1/RSPO1/SFRP1/MITF/PRKN/DACT3/SFRP2/RNF146/WLS/WNT2B/TMEM88/LRRK2/DIXDC1/ILK/ISL1/FZD8/FGF10/TMEM170B/DAPK3/RAPGEF1/FZD7/WNT9A/CYLD/TMEM131L/IGFBP6/SNAI2/TNN/COL1A1/PTEN/FOXO1/LZTS2/GSKIP/PPM1A/GNAQ/APC/NOG/CDK14/TLE2/LEF1/FZD2/RYR2/CAV1/PSME2/WNK1/SOX9/CTHRC1/US…	BP
organelle assembly	344/7182	699/17910	4.06211e-07	7.49234e-06	5.60181e-06	344	CD34/PDGFRB/NLGN2/MEF2C/WWTR1/NRXN2/FEZ1/PARVA/DZIP1/DYNC2H1/CC2D2A/MSN/SRPX/TTBK2/STING1/TUBA1A/MYH10/SHANK3/PIP4K2A/PDGFRA/STARD9/GSN/SH3PXD2B/MEF2A/CCDC69/ARMC9/MAP4/LRRK2/PINK1/P2RX7/BBS9/SEPTIN7/CIRBP/BBOF1/FLNA/MAP9/NEK1/KAT2B/GALNT11/TCTN1/RDX/ASAP1/PRKAR2B/CEP126/JHY/ITGB1/RAB23/PRKACA/CEP120/CYLD/POC1A/ARL6/PAFAH1B1/CDK1/DNAL1/GAP43/CFL2/MYH11/TPM1/SRF/TOGARAM1/WDR35/CROCC/PTPRS/PTEN/LDB…	BP
endothelial cell migration	151/7182	275/17910	4.12459e-07	7.59459e-06	5.67825e-06	151	ADGRA2/TEK/MAP3K3/CLEC14A/MMRN2/DCN/PECAM1/PTPRM/AKT3/SLIT2/TNFSF12/VEGFC/RHOJ/CYP1B1/PRKD1/MEOX2/TBXA2R/SERPINF1/GREM1/MEF2C/ACVRL1/NRP1/ANGPT1/VASH1/ROBO1/BMPR2/SPARC/FLT4/AMOTL1/FGF2/SMOC2/TGFB1/NR2F2/FGF1/ABL1/NRP2/ETS1/THBS1/HDAC5/SRPX2/FGFR1/BMPER/SASH1/PTN/KDR/RHOB/SOX18/HDAC7/ITGB3/STARD13/ATOH8/FAP/MECP2/MYH9/ITGB1/FOXP1/PLXND1/PIK3CA/TGFBR1/SRF/NOS3/GATA2/PRSS3/PTEN/ADAMTS9/CDH13/STAT5A…	BP
regulation of JUN kinase activity	57/7182	85/17910	4.40208e-07	8.09172e-06	6.04995e-06	57	ZEB2/MAP3K12/MDFIC/FZD4/ROR2/NRK/SFRP1/SFRP2/HIPK3/SASH1/FZD8/CCL19/MAP3K20/FGD2/PKN1/AIDA/TIAM1/MAP3K21/MAP3K6/EPHA4/MAP2K7/TAOK1/ARHGEF5/DUSP19/TRAF6/MAP3K2/TLR6/MAP4K5/DVL2/CD40LG/MAP3K7/MAPK8IP1/MAP3K9/DVL3/DTNBP1/TNFRSF11A/TNFSF11/MUL1/RIPK1/MAP3K10/PTPN1/HACD3/MAPK8IP3/MAP3K4/MAP3K13/MAP4K2/FZD5/GSTP1/WNT5A/AGER/DBNL/PAK1/TRAF2/RIPK2/EDN1/ERN2/VANGL2	BP
response to mechanical stimulus	115/7182	200/17910	4.43886e-07	8.14546e-06	6.09012e-06	115	DCN/PKD2/HTR2A/ENG/BACE1/NRXN2/PDE2A/MAP1B/CXCL12/SHANK3/TGFBR2/FYN/PKD1/TXNIP/TGFB1/ETS1/THBS1/P2RX7/PTN/COL3A1/TLR7/SLC8A1/FOXP2/DMD/AQP1/KCNK2/KIT/TACR1/SERPINE2/TLR5/ATP1A2/BMP6/TNC/TLR4/MAP3K14/COL1A1/BDKRB1/CCNB1/GOT1/CLCN6/GJA1/XPC/MMP14/PIEZO2/CXCR4/TNFSF14/KCNA5/PTCH1/TNFRSF1A/RYR2/HABP4/NFKBIA/SOX9/RIPOR2/POSTN/JUN/BTG2/FOSB/HDAC4/MAP3K2/STRBP/TMEM150C/SLC38A2/ENDOG/SMPD2/AGT/CACNB3/CHE…	BP
neutrophil activation	254/7182	499/17910	4.82709e-07	8.84283e-06	6.61153e-06	254	TIMP2/PECAM1/RAB31/CRISPLD2/ARSB/PLEKHO2/STOM/CD93/CYB5R3/STING1/ATP8B4/PTPRB/GSN/AP1M1/VPS35L/PRCP/YPEL5/FCGR2B/PREX1/C3/LAIR1/FGL2/DEGS1/VCL/ITGAV/ANO6/NFASC/RAB9B/STK10/RAP1A/GLIPR1/C3AR1/CD14/BST1/VAT1/METTL7A/GYG1/HGSNAT/GMFG/PRSS3/PRAM1/ITGAM/MAN2B1/ADA2/NCKAP1L/CD36/FCN1/HVCN1/CR1/CFP/FCGR2A/TUBB4B/PPIA/SIRPA/SIGLEC9/SYNGR1/ROCK1/TYROBP/BIN2/IDH1/AMPD3/NAPRT/CD59/CFD/CEP290/STBD1/VAMP8/SEL…	BP
regulation of autophagy	169/7182	314/17910	5.00772e-07	9.15818e-06	6.84731e-06	169	DCN/ITPR1/PRKD1/LZTS1/HGF/FEZ1/LEPR/RASIP1/BCL2/STING1/PIP4K2A/MID2/NOD1/PRKN/ABL1/FYCO1/LRRK2/RAB12/PINK1/ATP6V1G2/RRAGB/HERC1/KDR/EPM2A/DEPP1/DAPK3/SOGA1/HSPB8/UVRAG/PRKACA/ADRB2/PIK3CA/PRKAG2/ABL2/HTR2B/ATM/RRAGA/FOXO1/RNF152/SH3GLB1/FEZ2/VPS13D/TRIM22/TPCN1/FLCN/RAB3GAP1/TRIM8/EXOC7/UBQLN2/TSC2/MTMR9/NEDD4/MAPT/TREM2/TSPO/IFI16/TAB2/RNF41/TBC1D25/ATP5IF1/CAMKK2/GPSM1/TP53INP2/ROCK1/SIRT2/PIP4…	BP
regulation of anatomical structure size	228/7182	442/17910	5.07904e-07	9.2729e-06	6.93307e-06	228	GUCY1A1/ELN/PTPRM/AKT3/KIRREL1/SLIT2/HTR2A/EDNRA/SPART/ISLR2/PRKG1/LRRC8C/NRP1/MSN/MAP1B/CXCL12/SHANK3/BMPR2/MYADM/ADD1/GJA5/GSN/LRP1/FCHSD2/NPR1/F2R/JMY/SEMA3G/ACTA2/EVL/EDNRB/TMOD2/ABL1/PLXNA4/DPYSL2/TMOD1/ITGA1/LRRK2/P2RX7/MACF1/ILK/ULK2/SLC8A1/LMOD1/KCNMA1/PREX1/DOCK4/NTN1/FER/ANO6/KCNMB1/RDX/MEGF8/ADCYAP1/RTN4/PLEKHH2/PLEKHG2/RGS2/OLFM1/AQP1/FN1/PAFAH1B1/TACR1/ATP1A2/CFL2/SRF/NOS3/ECE1/RUFY3…	BP
negative regulation of protein metabolic process	526/7182	1116/17910	5.18966e-07	9.45886e-06	7.07212e-06	526	RECK/A2M/TIMP2/HEG1/EMILIN1/LDLRAD4/KIRREL1/SLIT2/SERPING1/ENG/CRTAP/PAPLN/DACT1/SPON1/FBLN1/IGFBP5/APBB1/MAP1A/GREM1/TIMP3/ITIH5/HGF/FRY/WWTR1/PLPP3/THY1/C4A/COL6A3/ADARB1/RASIP1/ANGPT1/PPM1F/SKI/MYADM/GNAI2/FTO/FYN/LMO3/SMPD1/LATS2/NOTCH4/CRIM1/TGFB1/NR2F2/BEX4/DYSF/C4B/CTDSP2/EDNRB/SPRY1/SFRP1/SH2B3/SOCS5/PRKN/ABL1/SFRP2/RASD2/GAS6/PURA/GFRA2/PLAT/THBS1/PHF1/GAS1/FXYD1/SUFU/CRYAB/DUSP26/LRRK2/…	BP
T cell receptor signaling pathway	105/7182	180/17910	5.34607e-07	9.7275e-06	7.27297e-06	105	THY1/FYN/CD81/PIK3R1/ABL1/DUSP3/RFTN1/PDE4B/CYLD/DUSP22/PIK3CA/CD4/PRNP/THEMIS2/PIK3CD/TESPA1/RAB29/EZR/PAK3/PDE4D/TAB2/PLCG1/CCR7/FYB1/PSME2/GRAP2/WNK1/PSMA5/TRAT1/TRAV29DV5/PSMD14/SKP1/GATA3/FBXW11/TRAC/TRAF6/PSMB3/TRBV12-3/LCP2/PSMB8/ZC3H12A/PTPRC/THEMIS/CD3G/MAP3K7/ITK/BTRC/TRBV7-9/TRAV8-4/CACNB3/CD247/FOXP3/CD3E/ZAP70/PSMA4/NCK1/MAPK1/PSMA3/TRAV19/CEACAM1/PSMA2/SPPL3/RELA/IKBKB/STOML2/PDPK1/…	BP
actin polymerization or depolymerization	100/7182	170/17910	5.73759e-07	1.04223e-05	7.79247e-06	100	ELN/KIRREL1/SLIT2/CXCL12/MYADM/ADD1/GSN/FCHSD2/JMY/WIPF1/EVL/TMOD2/TMOD1/FAM107A/LMOD1/PREX1/FER/RDX/ARHGAP6/PLEKHH2/PLEKHG2/MICAL2/AIF1/CFL2/ABI2/DSTN/SWAP70/NCKAP1L/HCLS1/TRIOBP/MAGEL2/PAK3/FHOD3/WASF1/ARPIN/BBS4/MICAL3/PRKCE/WASHC2C/MYO1C/CCR7/SNX9/SPIRE1/SEMA5A/WASF3/RASA1/DIAPH3/SPIRE2/F2RL1/HCK/ACTN2/CCL11/BRK1/KANK1/ARHGAP35/LATS1/SPTAN1/PICK1/NCK1/CARMIL1/BAIAP2L1/AP1AR/CDC42EP5/FCHSD1/NC…	BP
cellular response to drug	191/7182	362/17910	5.90285e-07	1.07045e-05	8.00344e-06	191	NR3C1/GUCY1B1/SLIT2/CYP1B1/SERPINF1/HGF/MEF2C/PDE2A/VIM/PPM1F/KLF9/NOD1/GNAI2/FYN/ADCY5/TGFB1/SFRP1/PRKN/ABL1/GAS6/ETS1/LDOC1/MTR/FOLR2/LRRK2/NSMCE3/PINK1/P2RX7/PPP1R14A/KDR/SSH1/RHOB/P2RY12/SLC8A1/ATP2B4/FBXO32/NCOA1/GNAI1/KCNMB1/AXL/NME1/PDE4B/TRPC6/PDGFD/RAP1A/CHRM2/AMIGO1/AQP1/CDK1/AIF1/PRNP/CHRNA3/PPP3CB/AIFM1/ADCY2/WDR35/PTEN/PPP1R12A/FOXO1/GSTM2/CCNA2/GABPA/TXN/CFLAR/CASQ2/CXCR4/CD69/PYCR1…	BP
positive regulation of angiogenesis	116/7182	203/17910	6.15795e-07	1.11484e-05	8.3353e-06	116	TEK/MAP3K3/CD34/AKT3/TNFSF12/RHOJ/ENG/RAMP2/CYP1B1/PRKD1/TBXA2R/PTGIS/CDH5/GREM1/HGF/ACVRL1/NRP1/APLNR/TGFBR2/GAB1/FGF2/SMOC2/FGF1/ABL1/SFRP2/ETS1/THBS1/PRKCB/SRPX2/BMPER/SASH1/KDR/RHOB/ISL1/HDAC7/C3/HSPB6/ITGB1/PIK3R6/AQP1/PPP1R16B/C3AR1/RRAS/FLT1/NOS3/GATA2/JAK1/CX3CR1/CMA1/AGTR1/ITGA5/CXCR4/PLCG1/ZNF304/TWIST1/STIM1/FOXC2/STAT3/C5AR1/LRG1/DDAH1/SMAD1/SEMA5A/DLL1/SIRT1/JCAD/CYBB/JMJD8/RAPGEF3/P…	BP
positive regulation of stress fiber assembly	38/7182	51/17910	6.23896e-07	1.12761e-05	8.43082e-06	38	LPAR1/TGFB3/ARHGEF15/NRP1/PPM1F/CCN2/SH3PXD2B/EVL/SFRP1/ABL1/NOX4/SORBS3/GPR65/TACR1/TGFBR1/TPM1/ARHGEF10/LIMCH1/TAC1/RGCC/ARHGEF5/RAPGEF3/MYOC/ITGB1BP1/CARMIL1/TESK1/RHOA/S100A10/RAC1/PAK1/TSC1/FHOD1/ROCK2/PXN/ARHGEF10L/EPHA1/NF2/RHOC	BP
regulation of protein transport	333/7182	677/17910	6.61871e-07	1.19424e-05	8.92902e-06	333	LRRC32/CD34/ITPR1/VEGFC/MDFIC/CD200/NLGN2/SYT11/APBB1/TGFB3/SSC5D/GLI3/STOM/LEPROT/KLF7/ANGPT1/PPM1F/PKIG/CSF1R/MYH10/GJA5/FRMD4A/LRP1/C1QTNF4/FYN/CD81/F2R/SMO/ARL2BP/ADCY5/TGFB1/RIPOR1/SFRP1/PRKN/PIK3R1/ABL1/GAS6/WLS/SUFU/LRRK2/PINK1/VAMP2/P2RX7/FCGR2B/NLRP1/APOD/ISL1/IGF1/PAM/CACNA1C/FLNA/AKAP12/IL33/P3H1/KCNB1/OAZ2/CARD8/MAPK11/RAP1A/RAB23/PRKACA/TRIM6/HYAL2/RAB11FIP3/FOXP1/CD14/FN1/TLR5/TLR1/…	BP
carbohydrate derivative biosynthetic process	348/7182	711/17910	6.8137e-07	1.22738e-05	9.17674e-06	348	MAN1C1/GUCY1B1/GUCY1A1/DCN/PDGFRB/CSGALNACT2/HTR2A/NPR2/GPC6/LUM/OMD/SDC2/GALNT16/PRELP/GALNT17/OGN/CHST7/ANGPT1/ADCY4/BGN/ST6GALNAC5/BCL2/CHSY3/HSPG2/GXYLT2/VCAN/BMPR2/ADCY9/DSEL/DSE/NPR1/NDST1/ADCY5/ST6GALNAC6/VEGFB/TGFB1/GUCY1A2/TRAK2/ST3GAL3/CHST12/EOGT/CHST14/PINK1/P2RX7/SDC3/FUT11/PRXL2C/A4GALT/GFPT2/CHST1/IGF1/ARNT/ZBTB20/PID1/ST3GAL5/GAL3ST4/ACACB/GALNT15/CSPG4/GALNT11/NME1/NAGK/POGLUT3/M…	BP
organonitrogen compound biosynthetic process	826/7182	1819/17910	7.05185e-07	1.26816e-05	9.48165e-06	826	PLPP1/QKI/RBMS3/MAN1C1/GUCY1B1/GGT5/GUCY1A1/DCN/PDGFRB/CSGALNACT2/HTR2A/NPR2/GPC6/LUM/PRKD1/OMD/SDC2/PTGIS/IGFBP5/GALNT16/APBB1/PRELP/BHMT2/GALNT17/GSTM5/PLPP3/STAT5B/OGN/CLIP3/CHST7/ANGPT1/VIM/ADCY4/BGN/ST6GALNAC5/BCL2/CHSY3/HSPG2/GXYLT2/VCAN/BMPR2/CDO1/NOD1/ADCY9/DSEL/FTO/DSE/ASPA/NPR1/SMPD1/NDST1/ADCY5/ST6GALNAC6/NOTCH4/VEGFB/TGFB1/GUCY1A2/TRAK2/DIO2/ST3GAL3/PURA/CHST12/EOGT/MTR/THBS1/FOLR2/AB…	BP
regulation of chondrocyte differentiation	35/7182	46/17910	7.4106e-07	1.33041e-05	9.94709e-06	35	MAF/GREM1/EFEMP1/GLI3/GLI2/ACVRL1/CCN2/GDF6/ZBTB16/RARB/TRPS1/WNT9A/SOX5/SNAI2/TGFBR1/CCN4/BMP6/GLG1/SIX2/ADAMTS12/ADAMTS7/SOX9/PKDCC/NKX3-2/BMPR1B/ZNF219/FGF18/RELA/HOXA11/CHADL/LOXL2/PTHLH/SCIN/AXIN2/MDK	BP
dendrite development	122/7182	216/17910	7.42268e-07	1.33041e-05	9.94709e-06	122	PREX2/DLG4/SDC2/LPAR1/LZTS1/NFATC4/MEF2C/CAMK1D/PRKG1/RBFOX2/NRP1/KLF7/NLGN3/SHANK3/MAP6/FYN/MEF2A/TRAK2/LRRK2/SYNGAP1/MATN2/ILK/CRTC1/PTN/PREX1/ITSN1/SARM1/SCARF1/MECP2/DOCK10/ASAP1/ITGB1/TRPC6/SRGAP2C/FBXO31/PAFAH1B1/CHRNA3/PTPRS/ABI2/PTEN/KIDINS220/ADGRB3/PICALM/TIAM1/NEDD4/MAP2/PDLIM5/CDC20/PAK3/ARID1B/C21orf91/MARK1/BHLHB9/BBS4/DBN1/EZH2/ID1/RAB17/SDK1/RAPGEF2/PTPRD/FLRT1/EPHA4/RAB21/LST1/CA…	BP
response to toxic substance	253/7182	499/17910	7.64312e-07	1.36601e-05	1.02133e-05	253	FBLN5/CLIC2/PDGFRB/INMT/CYP1B1/TBXA2R/CYGB/HGF/BCL2/MAP1B/SPARC/CDO1/SCN2B/GSN/GNAO1/FYN/TXNIP/SCN1B/GPX8/PDE1B/PRKN/ABL1/ETS1/CRYAB/LRRK2/PINK1/NXN/PRXL2C/PXDN/KDR/RHOB/SLC8A1/KCNMA1/KCNMB1/GPX7/RGS4/AXL/SNN/DUSP1/TRPC6/PDGFD/ADCYAP1/RGS2/AQP1/LTC4S/CD14/TXNDC17/CDK1/VCAM1/TACR1/PTGS1/ATP1A2/CHRNA3/ADCYAP1R1/SRF/NOS3/TPO/TNC/AIFM1/COL1A1/WDR35/RGS9/GSTO2/PTEN/CCNB1/SETD7/FOXO1/GSTM2/TXN/SLC2A4/G…	BP
regulation of response to external stimulus	419/7182	873/17910	7.64664e-07	1.36601e-05	1.02133e-05	419	A2M/C1S/C1R/ADGRA2/TEK/S1PR1/IL6ST/JAM3/CD34/PDGFRB/SLIT2/VEGFC/SELP/SERPING1/PRKD1/IL1R1/TBXA2R/CD200/SYT11/SERPINF1/PTGIS/LPAR1/CDH5/BACE1/GREM1/HGF/CAMK1D/PRKG1/STAT5B/RORA/C4A/NRP1/PDE2A/KANK2/PPM1F/FOXF1/PTGER3/C7/STING1/ROBO1/THBS4/CXCL12/BMPR2/TGFBR2/PDGFRA/NOD1/GPR183/LRP1/CD81/F2R/FGF2/SMOC2/CALCRL/TGFB1/RARRES2/FGF1/DYSF/C4B/EDNRB/RGMA/PHLDB2/SH2B3/SOCS5/CFH/PLXNA4/GAS6/ETS1/THBD/PLAT/T…	BP
mitochondrial translational elongation	57/7182	86/17910	7.96464e-07	1.42047e-05	1.06204e-05	57	MRPL12/MRPL23/MRPL52/MRPL48/MRPS5/MRPL27/MRPL3/MRPL15/MRPS34/MRPL13/MRPS2/AURKAIP1/MRPL37/PTCD3/MRPS12/MRPL58/MRPL50/MRPL44/MRPL17/CHCHD1/MRPL16/MRPL35/MRPL36/MRPL22/MRPL14/MRPL41/MRPS28/MRPL21/MRPS9/MRPS25/MRPS15/MRPS26/MRPL18/MRPS14/MRPL32/MRPS33/MRPL2/MRPL57/MRPS17/MRPS23/MRPS35/MRPL19/MRPS30/ERAL1/MRPS7/MRPL11/MRPS18B/MRPL4/MRPL45/MRPL20/MRPL39/MRPL51/MRPS22/MRPS18A/MRPL10/MRPS16/MRPL30	BP
negative regulation of cell cycle phase transition	140/7182	254/17910	8.04635e-07	1.43267e-05	1.07117e-05	140	FBXL7/PKD2/DACT1/FOXN3/KANK2/BCL2/PRMT2/CTDSP2/FAM107A/CCL2/SEPTIN7/FHL1/GPNMB/DUSP1/NACC2/ZFP36L1/FBXO31/CDK1/TFDP2/PTEN/CCNB1/ATM/MAD2L1/RBL2/SLFN11/CHMP4C/BRSK1/PCNA/CDC20/CDKN1B/APC/PLK1/AURKB/CDC25C/EZH2/PSME2/FOXO4/CDT1/CTDSP1/PSMA5/BTG2/RGCC/E2F8/SFN/TAOK1/PSMD14/TTK/TNKS1BP1/CNOT6L/KLHL22/SKP1/TRIP13/CNOT4/NOP53/ZNF655/MUC1/USP47/DTL/CENPF/CLSPN/MRNIP/PSMB3/CNOT11/AURKA/PLAGL1/PSMB8/GJC2/…	BP
regulation of extracellular matrix organization	32/7182	41/17910	8.22194e-07	1.46153e-05	1.09274e-05	32	PHLDB1/EMILIN1/DDR2/AEBP1/ANTXR1/LRP1/TGFB1/PHLDB2/ABL1/ETS1/FAP/PDPN/CFLAR/CLASP1/TCF15/TNFRSF1A/SOX9/RGCC/CLASP2/TNFRSF1B/HAS2/AGT/DDR1/CST3/CHADL/IL6/ADTRP/NOTCH1/COLGALT1/FGFR4/CARMIL2/FSCN1	BP
cyclic nucleotide metabolic process	29/7182	36/17910	8.23917e-07	1.46218e-05	1.09323e-05	29	PDE1A/GUCY1B1/GUCY1A1/NPR2/RORA/PDE2A/PDE5A/ADCY4/PDE7B/ADCY9/NPR1/ADCY5/GUCY1A2/PDE8B/PDE4B/ADCY2/PDE9A/PDE4D/ADCY3/PDE4A/ADCY1/NPPC/ADCY7/PDE10A/EPHA2/AMPD2/PTHLH/ADCY6/PDE8A	BP
respiratory tube development	101/7182	173/17910	8.27304e-07	1.46578e-05	1.09592e-05	101	HEG1/PDGFRB/GLI1/TCF21/ZFPM2/CRISPLD2/IGFBP5/TGFB3/GLI3/GLI2/FGF7/FOXF1/BMPR2/SPARC/TGFBR2/PDGFRA/CCN2/EPAS1/FLT4/PKD1/FGF1/SPRY1/LOXL3/WNT2B/PGR/FGFR1/PTN/FOXP2/FGF10/NFIB/MYOCD/HSD11B1/RCN3/HECA/ADAMTS2/BMPR1A/PDPN/SRF/NOS3/ESRP2/LOX/TNC/ATXN1L/MMP14/GRHL2/HOXA5/CREB1/CIC/NOG/TULP3/TRAF4/STK40/ID1/SIM2/ADAMTSL2/MAN1A2/SOX9/AGR2/FSTL3/RBPJ/RIDA/RSPO2/PKDCC/HHIP/SMPD3/SAV1/DLG5/YAP1/KLF2/AARD/WNT…	BP
positive regulation of autophagy	71/7182	113/17910	8.35779e-07	1.47837e-05	1.10533e-05	71	DCN/PRKD1/STING1/PIP4K2A/MID2/NOD1/PRKN/FYCO1/LRRK2/RAB12/PINK1/KDR/EPM2A/HSPB8/UVRAG/ADRB2/FOXO1/RNF152/SH3GLB1/VPS13D/TRIM22/TPCN1/FLCN/RAB3GAP1/TRIM8/TSC2/ATP5IF1/CAMKK2/GPSM1/TP53INP2/ROCK1/PIP4K2B/ULK1/PRKAA2/SIRT1/VPS13C/FOXO3/KAT5/ZC3H12A/BNIP3L/HK2/MAP3K7/ATG7/TP53INP1/TFEB/MUL1/OPTN/MFN2/EIF2AK4/SMCR8/WAC/TRIM13/PLK3/FBXO7/HIF1A/SVIP/BECN1/PIP4K2C/BAG3/HMOX1/PLEKHF1/LRSAM1/TRIM65/TOMM7/T…	BP
mitochondrial translational termination	58/7182	88/17910	8.47867e-07	1.4973e-05	1.11949e-05	58	MRPL12/MRPL23/MRPL52/MRPL48/MRPS5/MRPL27/MRPL3/MRPL15/MRPS34/MRPL13/MRPS2/AURKAIP1/MRPL37/PTCD3/MRPS12/MRPL58/MRPL50/MRPL44/MRPL17/CHCHD1/MRPL16/MRPL35/MRPL36/MRPL22/MRPL14/MRPL41/MRPS28/MRPL21/MRPS9/MRPS25/MRPS15/MRPS26/MRPL18/MRPS14/MRRF/MRPL32/MRPS33/MRPL2/MRPL57/MRPS17/MRPS23/MRPS35/MRPL19/MRPS30/ERAL1/MRPS7/MRPL11/MRPS18B/MRPL4/MRPL45/MRPL20/MRPL39/MRPL51/MRPS22/MRPS18A/MRPL10/MRPS16/MRPL30	BP
negative regulation of cell cycle process	182/7182	344/17910	8.51859e-07	1.50189e-05	1.12292e-05	182	FBXL7/PKD2/DACT1/FOXN3/KANK2/BCL2/PRMT2/PHC1/CTDSP2/FAM107A/CCL2/SEPTIN7/FHL1/FGF10/KAT2B/PPP2R5B/GPNMB/DUSP1/NACC2/ZFP36L1/FBXO31/CDK1/TFDP2/SETMAR/BCL6/PHC3/PTEN/CCNB1/ATM/MAD2L1/RBL2/SLFN11/PRKAR1A/CHMP4C/BRSK1/EVI2B/PCNA/CDC20/EPC1/CDKN1B/APC/PLK1/AURKB/CDC25C/EZH2/RRM2/PSME2/FOXO4/CDT1/CTDSP1/PSMA5/BTG2/RGCC/E2F8/SFN/TAOK1/PSMD14/TOM1L2/TTK/TNKS1BP1/ATRX/CNOT6L/KLHL22/SKP1/RYBP/TRIP13/CNOT4/…	BP
regulation of phosphatidylinositol 3-kinase signaling	73/7182	117/17910	8.71154e-07	1.5309e-05	1.14461e-05	73	TEK/DCN/PDGFRB/SELP/HGF/ANGPT1/PIP4K2A/PDGFRA/GAB1/FYN/F2R/PIK3IP1/PIP5K1C/PIK3R1/FGFR1/KDR/IGF1/DIPK2A/PPP2R5B/PIK3R5/PPP1R16B/KIT/PIK3CA/CD28/SERPINE2/FLT1/PTEN/PIK3CD/PTPN13/HCLS1/TSC2/NEDD4/PDGFB/CEP55/TWIST1/PIP4K2B/FBXL2/HCST/SOX9/PIP5K1B/FGR/SIRT1/NLRC3/NOP53/F2RL1/CAT/ERBB3/MYOC/TGFB2/AGT/SLC9A3R1/CBL/MAPK1/CEACAM1/PIK3CG/MIR126/PPP2R5C/RGL2/NCF1/BECN1/PIP4K2C/RELN/RASGRP1/BTN2A2/PRR5L/IE…	BP
regulation of protein localization to nucleus	73/7182	117/17910	8.71154e-07	1.5309e-05	1.14461e-05	73	MDFIC/GLIS2/GLI3/ANGPT1/PKIG/DCLK2/FYN/SMO/TGFB1/PIK3R1/SUFU/APOD/FLNA/NGFR/RAB23/HYAL2/CDK1/PKIA/LZTS2/HCLS1/FLCN/DKC1/TRIM8/CD36/PLK1/CDH1/CHP1/DCLK1/PIN1/PYHIN1/OTUD7B/CD2AP/ZC3H12A/ECT2/GTSE1/FERMT1/CDK5RAP3/RASSF5/CCT8/MAPK1/CCT6A/KAT7/CCT3/DMAP1/GLUL/CCT5/RAN/MAPK14/TRIM40/PRKCD/SIN3A/LILRB4/TMEM98/NOLC1/CCT7/CCT4/LMNA/BAG3/TCP1/ILRUN/HDAC3/BYSL/CLDN18/LEP/AKT1/JUP/MFHAS1/RBM22/SRC/CARD10/N…	BP
regulation of peptide transport	345/7182	706/17910	9.22328e-07	1.61648e-05	1.20859e-05	345	LRRC32/CD34/ITPR1/VEGFC/MDFIC/CD200/NLGN2/SYT11/APBB1/TGFB3/SSC5D/GLI3/STOM/LEPROT/KLF7/ANGPT1/PPM1F/PKIG/CSF1R/MYH10/GJA5/FRMD4A/LRP1/C1QTNF4/FYN/CD81/F2R/SMO/ARL2BP/ADCY5/TGFB1/RIPOR1/RAB8B/SFRP1/PRKN/PIK3R1/ABL1/GAS6/WLS/SUFU/LRRK2/PINK1/VAMP2/P2RX7/FCGR2B/NLRP1/APOD/ISL1/IGF1/PAM/CACNA1C/FLNA/AKAP12/ITSN1/IL33/P3H1/KCNB1/OAZ2/CARD8/MAPK11/ADCYAP1/RAP1A/RAB23/PRKACA/TRIM6/HYAL2/RAB11FIP3/FOXP1…	BP
endothelial cell development	40/7182	55/17910	9.22844e-07	1.61648e-05	1.20859e-05	40	HEG1/PECAM1/ENG/S1PR3/CDH5/CLIC4/PDE2A/MSN/MYADM/ADD1/NOTCH4/SOX18/COL18A1/RAPGEF1/CLDN5/RDX/RAP1A/PPP1R16B/ARHGEF26/PTPRS/VEZF1/EZR/PDE4D/F11R/ROCK1/TNFRSF1A/ID1/RAPGEF2/TJP1/F2RL1/RAPGEF3/S1PR2/RAP1B/STC1/CCM2/MARVELD2/IKBKB/GPX1/TJP2/ROCK2	BP
mitotic cell cycle checkpoint	88/7182	147/17910	9.47925e-07	1.65503e-05	1.23742e-05	88	FOXN3/TGFB1/ZWINT/DUSP1/WNT9A/FBXO31/CDK1/MAP3K20/TFDP2/SETMAR/CCNB1/ATM/MAD2L1/RBL2/XPC/CHMP4C/BRSK1/PCNA/CDC20/CDKN1B/APC/CHFR/PLK1/BUB1/AURKB/CDC25C/BUB1B/FOXO4/CDT1/BTG2/RGCC/E2F8/SFN/TAOK1/TTK/TNKS1BP1/CNOT6L/KLHL22/TRIP13/CNOT4/NOP53/MUC1/CENPF/CLSPN/MRNIP/CNOT11/AURKA/PLAGL1/ZNF385A/NDC80/ZWILCH/GTSE1/CDK5RAP3/TIPIN/TAOK2/BRCA1/MDM4/ATF2/E2F1/TICRR/GADD45A/KNTC1/IK/CNOT8/DONSON/E2F7/PLK3/C…	BP
regulation of actin polymerization or depolymerization	88/7182	147/17910	9.47925e-07	1.65503e-05	1.23742e-05	88	ELN/KIRREL1/SLIT2/CXCL12/MYADM/ADD1/GSN/FCHSD2/JMY/EVL/TMOD2/TMOD1/LMOD1/PREX1/FER/RDX/PLEKHH2/PLEKHG2/CFL2/ABI2/DSTN/SWAP70/NCKAP1L/HCLS1/TRIOBP/MAGEL2/PAK3/FHOD3/WASF1/ARPIN/BBS4/PRKCE/WASHC2C/MYO1C/CCR7/SNX9/SPIRE1/SEMA5A/RASA1/SPIRE2/F2RL1/HCK/ACTN2/CCL11/BRK1/KANK1/ARHGAP35/LATS1/SPTAN1/PICK1/NCK1/CARMIL1/BAIAP2L1/AP1AR/CDC42EP5/FCHSD1/NCK2/VILL/PRKCD/HIP1R/TWF2/MTPN/CIT/CCL21/WAS/WHAMM/TMSB…	BP
negative regulation of cellular protein metabolic process	495/7182	1049/17910	9.62616e-07	1.67797e-05	1.25457e-05	495	RECK/A2M/TIMP2/HEG1/EMILIN1/LDLRAD4/KIRREL1/SLIT2/SERPING1/ENG/CRTAP/PAPLN/DACT1/FBLN1/IGFBP5/MAP1A/GREM1/TIMP3/ITIH5/HGF/FRY/WWTR1/PLPP3/THY1/C4A/COL6A3/ADARB1/RASIP1/ANGPT1/PPM1F/SKI/MYADM/GNAI2/FTO/FYN/LMO3/SMPD1/LATS2/NOTCH4/CRIM1/TGFB1/NR2F2/BEX4/DYSF/C4B/CTDSP2/EDNRB/SPRY1/SFRP1/SH2B3/SOCS5/PRKN/ABL1/SFRP2/RASD2/GAS6/PURA/GFRA2/PLAT/THBS1/PHF1/GAS1/FXYD1/SUFU/CRYAB/DUSP26/LRRK2/ITIH3/PINK1/…	BP
immune response-regulating cell surface receptor signaling pathway	223/7182	434/17910	9.82378e-07	1.70965e-05	1.27826e-05	223	MAPK10/MEF2C/THY1/CMTM3/BCL2/PRKCH/FYN/CD81/WIPF1/PIK3R1/ABL1/CLEC10A/PRKCB/FCGR2B/ELMO1/DUSP3/WASF2/MS4A2/PRKACB/FCER1A/RFTN1/FER/CREBBP/RAPGEF1/PDE4B/RAP1A/PRKACA/FOXP1/CYLD/C3AR1/DUSP22/KIT/PIK3CA/CD4/PRNP/THEMIS2/PPP3CB/PIK3CD/CD209/NFATC1/PLCL2/TESPA1/RAB29/DOCK1/NCKAP1L/ELF2/LILRA4/NFATC2/SHC1/FCN1/SOS1/CR1/EZR/ELMO2/FCGR2A/PAK3/PDE4D/TAB2/PLCG1/PRKCE/MYO1C/CCR7/LILRB1/FYB1/NR4A3/PSME2/GRAP…	BP
integrin-mediated signaling pathway	61/7182	94/17910	9.94531e-07	1.72802e-05	1.29199e-05	61	PRKD1/THY1/NRP1/FERMT2/CCN2/TLN1/ITGA9/ADAMTS1/ITGA7/LOXL3/ABL1/LIMS2/ITGA1/ILK/PTN/COL16A1/COL3A1/ITGB3/FLNA/ZYX/ITGAV/MYH9/ITGB5/ITGB1/PLP1/TIMP1/BST1/ITGA4/ITGA11/ITGAM/DOCK1/ITGA5/DST/TYROBP/ZNF304/ITGA8/FGR/NEDD9/ITGAL/HCK/ITGAX/ITGB2/CD63/FERMT1/CCM2/ITGB1BP1/ERBIN/CEACAM1/LAMA5/ITGA6/FCER1G/PTPN11/CDH17/VAV1/NME2/MADCAM1/ITGB7/PLEK/SRC/ADAM9/RCC2	BP
DNA replication	142/7182	259/17910	1.01113e-06	1.75404e-05	1.31144e-05	142	GLI1/RBMS1/GLI2/ACVRL1/NFIA/NFIC/NFIX/PURA/FGFR1/POLK/FGF10/TSPYL2/NFIB/PCLAF/CDK1/REV3L/ING4/SETMAR/BCL6/ATM/CCDC88A/SLFN11/ZBTB38/CCNA2/CENPX/ORC6/ESCO2/PCNA/RPA3/SAMHD1/BOD1L1/POLE2/CDC45/RECQL4/HMGA1/RRM2/CTC1/MCM4/GINS1/CDT1/POLD2/FEN1/GMNN/JUN/WIZ/NAP1L1/REV1/MCM10/E2F8/CENPS/POLI/TBRG1/RFC3/ATRX/DBF4/TONSL/ORC1/RAD51/DTL/CLSPN/EXO1/KAT5/BRIP1/RFC4/FBH1/GINS2/RMI1/ID3/DNA2/ATG7/CHAF1B/CHAF1…	BP
immune response-regulating signaling pathway	299/7182	603/17910	1.01947e-06	1.76567e-05	1.32014e-05	299	MAPK10/COLEC12/MEF2C/THY1/CTSK/CMTM3/BCL2/TRIL/NOD1/PJA2/PRKCH/FYN/CD81/WIPF1/PIK3R1/ABL1/CLEC10A/PRKCB/FCGR2B/ELMO1/DUSP3/WASF2/TLR7/MS4A2/PRKACB/FCER1A/RFTN1/SARM1/LY96/FER/CREBBP/RAPGEF1/PDE4B/RAP1A/RTN4/PRKACA/FOXP1/CYLD/C3AR1/DUSP22/KIT/PIK3CA/CD14/CD4/TLR5/TLR1/PRNP/THEMIS2/PPP3CB/TLR4/PTPRS/ITGAM/PIK3CD/TRIM15/CD209/NFATC1/PLCL2/TESPA1/RAB29/DOCK1/NCKAP1L/ELF2/LILRA4/NFATC2/SHC1/CD36/FCN1/…	BP
renal system development	157/7182	291/17910	1.03542e-06	1.79041e-05	1.33864e-05	157	TEK/TNS2/DCN/CD34/PECAM1/PKD2/PDGFRB/SLIT2/FBN1/TCF21/HEYL/DCHS1/SERPINF1/KCNJ8/GREM1/GLIS2/MEF2C/GLI3/WWTR1/FAT4/GLI2/NID1/NRP1/NFIA/KANK2/ANGPT1/FOXF1/BCL2/MAGI2/PBX1/SOX17/PDGFRA/LAMB2/NOTCH3/SMO/PKD1/ADAMTS1/ACTA2/FGF2/TGFB1/FGF1/SPRY1/SFRP1/WNT2B/LRRK2/FGFR1/ILK/BMPER/FGF10/EPCAM/SULF1/COL4A1/ZBTB16/MYOCD/RARB/ARID5B/PDGFD/HYAL2/GPR4/TGFBR1/BMP6/LZTS2/PGF/CFLAR/AKR1B1/COL4A4/SIX2/OSR1/AGTR1/…	BP
cellular response to nerve growth factor stimulus	33/7182	43/17910	1.09856e-06	1.89655e-05	1.418e-05	33	MAGI2/RAPGEF1/RAP1A/PTEN/STMN2/KIDINS220/DYNC1LI2/MAPT/CREB1/WASF1/ID1/RAPGEF2/TAC1/HSPA5/KIF1B/FOXO3/EEF2/EEF2K/APP/CBL/E2F1/CIB1/PDPK1/RPL8/RAB35/ACAP2/ARPC3/CORO1A/MICALL1/EHD1/SORT1/AKT1/CRK	BP
positive regulation of hemopoiesis	105/7182	182/17910	1.11137e-06	1.91561e-05	1.43224e-05	105	GLI3/GLI2/STAT5B/ROR2/IL34/TGFBR2/HLX/TGFB1/SOCS5/GAS6/ETS1/CSF1/ZMIZ1/ARNT/KLF10/ZBTB16/ITPKB/AXL/PIK3R6/ZFP36L1/TAL1/FES/CYLD/CD4/ZBTB46/CCL19/NLRP3/GATA2/BCL6/ATXN1L/TESPA1/IL4R/NCKAP1L/MMP14/HCLS1/EVI2B/IL7R/VSIR/HOXA5/ACVR2A/CREB1/TREM2/RAB7B/TNFSF4/TYROBP/CD83/LEF1/EGR3/CD86/STAT3/ZBTB1/JUN/ATP11C/CCR1/INHBA/LILRB2/HMGB2/GATA3/N4BP2L2/TRAF6/BTK/FOXO3/MYB/PTPRC/PNP/FOXP3/RHEX/ZAP70/CD46/SASH…	BP
granulocyte migration	64/7182	100/17910	1.12539e-06	1.93668e-05	1.448e-05	64	JAM3/PECAM1/SLIT2/IL1R1/CAMK1D/THBS4/ITGA9/CD99L2/RARRES2/DYSF/PIP5K1C/THBS1/ITGA1/CSF1/PREX1/PDE4B/C3AR1/BST1/JAML/CCL19/PIK3CD/NCKAP1L/PDE4D/MPP1/CCR7/CMKLR1/C5AR1/RIPOR2/CXCL3/IRAK4/CXADR/C1QBP/IL17RA/TGFB2/CCL11/ITGB2/HRH1/S100A14/TIRAP/AKIRIN1/SCG2/MAPK14/CD300A/JAGN1/PTGER4/LGALS3/PIK3CG/CXCL17/IL17RC/CCL21/KARS1/CCL13/VAV1/GBF1/WDR1/RAC1/SLAMF8/MOSPD2/CKLF/ANXA1/MDK/EDN1/PLA2G1B/CSF3R	BP
response to peptide hormone	209/7182	404/17910	1.15001e-06	1.97589e-05	1.47732e-05	209	TEK/FBN1/RAB31/IGFBP5/RHOQ/GLP2R/STAT5B/LEPROT/ADCY4/SESN3/MAP1B/CXCL12/SPARC/CDO1/CCN2/ADCY9/GNAI2/GHR/GAB1/FYN/ADCY5/TGFB1/RARRES2/EDNRB/PIK3R1/HDAC5/PRKCB/ATP6V1G2/TGFBR3/VAMP2/PRKACB/SORBS1/PID1/KAT2B/MYO5A/FER/GNAI1/PLN/PRKAR2B/SOGA1/PRKACA/ZFP36L1/KL/MBD5/TIMP1/PIK3CA/GPR173/ADCY2/COL1A1/PTEN/FOXO1/PRKAR1A/GOT1/GJA1/CCNA2/CFLAR/SLC2A4/STAT5A/AGTR1/SHC1/TSC2/SOS1/SIK2/INPP5K/CREB1/ARID1B/CDK…	BP
plasma membrane invagination	37/7182	50/17910	1.17021e-06	2.00741e-05	1.50088e-05	37	RAB31/MFGE8/GSN/SNX18/THBS1/ABCA1/FCGR2B/ELMO1/C3/MYH9/ANO6/AIF1/SNX33/GATA2/ITGAM/MSR1/DOCK1/NCKAP1L/CD36/TREM2/BIN2/AURKB/SNX9/SPIRE1/SPIRE2/F2RL1/ARHGAP25/ITGB2/CD300A/FCER1G/ARHGAP12/PPARG/FCGR1A/SH3BP1/BECN1/RHOA/XKR8	BP
regulation of cyclin-dependent protein serine/threonine kinase activity	55/7182	83/17910	1.25121e-06	2.14295e-05	1.60222e-05	55	PKD2/LATS2/PKD1/NR2F2/KAT2B/CKS2/MYOCD/PTEN/CCNB1/CDC25A/CDKN3/CDKN1B/PDGFB/APC/PLK1/CDC25C/DIRAS3/PKMYT1/CKS1B/RGCC/SFN/TNFAIP3/CCNY/CDKN1C/ACTB/HEXIM1/CCND2/LATS1/BCCIP/HERC5/CDK5RAP3/MAPRE3/INCA1/CDKN2C/CCNC/CASP3/GADD45A/PSRC1/CDKN2D/FBXO7/HHEX/ADAM17/CDK7/CDKN2A/BLM/GTPBP4/MEN1/AKT1/SERTAD1/CCND1/SRC/CDKN2B/CCND3/CDKN1A/CDC6	BP
positive regulation of cell-substrate adhesion	69/7182	110/17910	1.29814e-06	2.2198e-05	1.65968e-05	69	TEK/COL8A1/CCDC80/NID1/ABI3BP/THY1/NRP1/PPM1F/FOXF1/MYADM/SMOC2/SFRP1/ABL1/UTRN/CSF1/ILK/PTN/KDR/COL16A1/PREX1/FLNA/RSU1/CCN1/EDIL3/FN1/EGFLAM/CDH13/DOCK1/TRIOBP/ITGA5/CD36/CASS4/PLEKHA2/ROCK1/PRKCE/NINJ1/CCR7/AGR2/LIMS1/NEDD9/ARL2/C1QBP/MYOC/HAS2/CCL28/ARHGEF7/MAP4K4/CD3E/FERMT1/ITGB1BP1/CARMIL1/NDNF/ITGA6/CIB1/PRKCZ/CCL21/DNM2/DOCK5/IQGAP1/S100A10/RAC1/RAC3/TSC1/CALR/JUP/MDK/EPHA1/CRK/CX3CL1	BP
regulation of cell cycle phase transition	236/7182	464/17910	1.31201e-06	2.23996e-05	1.67475e-05	236	FBXL7/PKD2/GLI1/DACT1/FOXN3/KANK2/BCL2/PBX1/TUBA1A/PRMT2/SMARCD3/UBE2E2/PKD1/ADAMTS1/TGFB1/CTDSP2/FAM107A/CCL2/SEPTIN7/FHL1/ATP2B4/FGF10/HSPA2/MECP2/GPNMB/RDX/PRKAR2B/DUSP1/NACC2/PRKACA/ZFP36L1/FBXO31/PAFAH1B1/CDK1/AIF1/TFDP2/HMMR/PTEN/CCNB1/ATM/HECW2/MAD2L1/RBL2/PKIA/SLFN11/XPC/CHMP4C/BRSK1/ACTR1A/PLK4/CLASP1/PCNA/CDC20/TUBB4B/DLGAP5/CDKN1B/APC/KCNA5/DCTN1/DYRK3/PLK1/AURKB/SIRT2/ANLN/CDC25C/EZH2…	BP
actin cytoskeleton reorganization	56/7182	85/17910	1.33135e-06	2.26939e-05	1.69676e-05	56	TEK/S1PR1/ANTXR1/FGF7/NRP1/NOTCH2/CSF1R/PDGFRA/GSN/GAB1/TGFB1/ABL1/FGF10/FLNA/DAPK3/FER/MYH9/PDLIM4/GPR65/FES/KIT/PHACTR1/ABL2/GMFG/HCLS1/SHC1/EZR/CDC42BPG/ARAP1/F11R/PARVB/CDC42BPA/AUTS2/RAPGEF3/S1PR2/HCK/CD2AP/CXADR/ARHGDIB/DTNBP1/BAIAP2L1/RALA/RAP2A/PTPN1/MKLN1/WHAMM/FARP2/RHOA/PAK1/CDC42BPB/PLEK/ANXA1/RHOD/MDK/RICTOR/SEMA3E	BP
lymphocyte activation involved in immune response	93/7182	158/17910	1.35266e-06	2.30209e-05	1.7212e-05	93	RORA/NOTCH2/GPR183/DOCK11/CD81/HLX/TGFB1/LOXL3/SOCS5/ABL1/ITM2A/FCGR2B/LGALS1/FGL2/DOCK10/CD1C/FOXP1/CD28/CCL19/NLRP3/TLR4/BCL6/SWAP70/PLCL2/IL4R/MFNG/TNFSF4/HSPD1/LEF1/LILRB1/CD86/STAT3/SPN/JAK3/EOMES/DLL1/SLAMF6/TNFSF18/GATA3/F2RL1/LY9/EXO1/ITGAL/ERCC1/ZC3H12A/CD40LG/MYB/PTPRC/TP53BP1/SMAD7/FOXP3/TFRC/ITFG2/HAVCR2/CD46/SUPT6H/CEACAM1/MLH1/STAT6/NKX2-3/PRKCZ/APBB1IP/PTGER4/LGALS3/IL6/RELB/EIF2AK…	BP
antigen processing and presentation	123/7182	220/17910	1.37865e-06	2.34261e-05	1.7515e-05	123	NOD1/AP1M1/RAB8B/THBS1/FCGR2B/CD1D/MR1/RFTN1/CTSF/FGL2/ITGAV/ITGB5/SEC23A/LNPEP/CCL19/MARCHF1/SEC31A/AP1M2/KIF3C/RAB34/DYNC1I1/CD209/DYNC1LI2/RAB32/ACTR1A/KLC1/CD36/OSBPL1A/TREM2/DCTN1/AP1S1/CCR7/KIF2C/PSME2/VAMP8/DYNC1H1/KIF11/KIF15/PSMA5/KIF4A/CTSL/AP1S2/PSMD14/AP1S3/KIFAP3/LILRB2/CYBB/KIF18A/KIF23/TRAF6/RAB3C/RACGAP1/PSMB3/PSMB8/RAB5B/CENPE/ACTR10/KIF22/PDIA3/CAPZB/BCAP31/KIF3A/CLEC4A/PSMA4/AP…	BP
respiratory system development	110/7182	193/17910	1.4121e-06	2.39568e-05	1.79118e-05	110	HEG1/PDGFRB/GLI1/TCF21/ZFPM2/CRISPLD2/IGFBP5/TGFB3/GLI3/GLI2/FGF7/MSC/FOXF1/SKI/BMPR2/SPARC/TGFBR2/PDGFRA/CCN2/EPAS1/FLT4/ALDH1A3/PKD1/FGF1/SPRY1/LOXL3/WNT2B/PGR/FGFR1/PTN/FOXP2/FGF10/NFIB/MYOCD/KCNAB1/HSD11B1/RCN3/ADAMTS2/BMPR1A/PDPN/SRF/NOS3/ESRP2/LOX/TNC/ATXN1L/MMP14/GRHL2/HOXA5/CREB1/CIC/GNG8/NOG/TULP3/DISP1/BASP1/STK40/ID1/SIM2/ADAMTSL2/MAN1A2/SOX9/AGR2/FSTL3/RBPJ/RIDA/RSPO2/PKDCC/HHIP/SMPD3…	BP
heart valve morphogenesis	38/7182	52/17910	1.42011e-06	2.4055e-05	1.79852e-05	38	ELN/EMILIN1/SLIT2/HEYL/DCHS1/SLIT3/MEF2C/NOTCH2/ROBO1/BMPR2/TGFBR2/GJA5/TGFB1/CCN1/OLFM1/BMPR1A/SNAI2/NOS3/HEY2/ADAMTS9/NFATC1/ROCK1/DLL4/TWIST1/SOX9/SNAI1/GATA3/SMAD4/TGFB2/ACVR1/MDM4/HEY1/NOTCH1/FGFRL1/EFNA1/ROCK2/SCX/JAG1	BP
regulation of actin filament length	88/7182	148/17910	1.42242e-06	2.40562e-05	1.79861e-05	88	ELN/KIRREL1/SLIT2/CXCL12/MYADM/ADD1/GSN/FCHSD2/JMY/EVL/TMOD2/TMOD1/LMOD1/PREX1/FER/RDX/PLEKHH2/PLEKHG2/CFL2/ABI2/DSTN/SWAP70/NCKAP1L/HCLS1/TRIOBP/MAGEL2/PAK3/FHOD3/WASF1/ARPIN/BBS4/PRKCE/WASHC2C/MYO1C/CCR7/SNX9/SPIRE1/SEMA5A/RASA1/SPIRE2/F2RL1/HCK/ACTN2/CCL11/BRK1/KANK1/ARHGAP35/LATS1/SPTAN1/PICK1/NCK1/CARMIL1/BAIAP2L1/AP1AR/CDC42EP5/FCHSD1/NCK2/VILL/PRKCD/HIP1R/TWF2/MTPN/CIT/CCL21/WAS/WHAMM/TMSB…	BP
chemical homeostasis	479/7182	1015/17910	1.43168e-06	2.4175e-05	1.8075e-05	479	CYBRD1/S1PR1/CLIC2/SYNPO/DCN/RAMP3/PKD2/ITPR1/HTR2A/DLG4/EDNRA/SERPINF1/IGFBP5/S1PR3/LPAR1/CYSLTR1/TRPC1/CLIC4/SGCD/RORA/THY1/LEPR/ATP1B2/KLF7/ANK2/ADCY4/SESN3/BCL2/C7/APLNR/CXCL12/PDGFRA/ADCY9/GJA5/EPAS1/GNAI2/SCN2B/SLC39A13/LRP1/SLC22A17/NPR1/FYN/F2R/ADGRF5/SFRP4/ADCY5/PKD1/SCN1B/FGF2/KCTD7/TGFB1/EDNRB/PRKN/PIK3R1/ABL1/PRCP/GAS6/PTH1R/CCL14/LRRK2/ABCA1/PRKCB/ATP6V1G2/CRY2/P2RX7/FHL1/FBXL5/KDR/G…	BP
response to estradiol	78/7182	128/17910	1.45256e-06	2.44892e-05	1.83098e-05	78	RAMP3/PDGFRB/RAMP2/DHH/PTGFR/STAT5B/MAP1B/CCN2/TXNIP/TGFB1/NR2F2/SFRP1/ETS1/CRYAB/PTN/PAM/FGF10/NCOA1/DUSP1/BCL2L2/CD4/WFDC1/TACR1/ADCYAP1R1/AIFM1/COL1A1/RGS9/PTEN/GJA1/CCNA2/CFLAR/PCNA/CDKN1B/H2AZ1/SOCS2/PTCH1/ESRRA/EZH2/STAT3/NRIP1/MMP15/POSTN/KIF18A/NCOR2/CAT/KAT5/STRN3/EEF2/PENK/ENDOG/OXTR/NQO1/AGT/FOXA1/RUVBL2/CASP3/CST3/TFPI/NCOA3/DNMT3A/STXBP1/OPRL1/MSX2/GPX4/RBBP8/GSTP1/SRD5A1/FAM210B/GPE…	BP
heart valve development	43/7182	61/17910	1.46074e-06	2.45597e-05	1.83626e-05	43	ELN/EMILIN1/SLIT2/HEYL/DCHS1/SLIT3/MEF2C/PDE2A/NOTCH2/ROBO1/BMPR2/TGFBR2/GJA5/TGFB1/CCN1/OLFM1/BMPR1A/SNAI2/NOS3/HEY2/ADAMTS9/NFATC1/ROCK1/DLL4/TNFRSF1A/TWIST1/SOX9/ZBTB14/RBPJ/SNAI1/GATA3/SMAD4/TGFB2/TNFRSF1B/ACVR1/MDM4/HEY1/NOTCH1/FGFRL1/EFNA1/ROCK2/SCX/JAG1	BP
mitotic sister chromatid segregation	80/7182	132/17910	1.46129e-06	2.45597e-05	1.83626e-05	80	ANKRD53/ZWINT/DUSP1/CCNB1/ATM/HECW2/MAD2L1/CDCA8/CHMP4C/NCAPG/MAU2/CDC20/DLGAP5/APC/PLK1/AURKB/KIF2C/NUMA1/NCAPH/KIF14/BUB1B/NUSAP1/CDT1/KNSTRN/SGO1/KIF4A/TTK/ATRX/KLHL22/CDCA5/POGZ/SPAG5/TRIP13/NEK2/KIF18A/KIF23/ESPL1/CENPF/RACGAP1/HASPIN/SLF2/KIFC1/CENPE/NDC80/KIF22/SMC2/PHF13/PRC1/CHMP7/IK/MACROH2A1/RAN/PDS5B/TACC3/DSCC1/BUB3/CHMP1B/NAA10/CHMP6/INCENP/SMC4/NCAPD3/PSRC1/RAB11A/AKAP8L/TNKS/RRS1/…	BP
protein modification by small protein conjugation or removal	494/7182	1050/17910	1.51134e-06	2.53325e-05	1.89404e-05	494	FBXL7/SEPTIN4/RNF180/PRICKLE1/KCTD10/MARCHF2/AR/WWTR1/SH3RF3/RNF217/SPSB1/HECTD2/RNF130/ANGPT1/BCL2/RNF144A/PDZRN3/NEURL1B/MID2/USP51/EPAS1/PJA2/PHC1/FYN/UBE2E2/RNF150/IRF2BPL/DYSF/SOCS5/PRKN/ABL1/KLHL20/RNF146/RNF122/RASD2/FAM107A/LRRK2/NSMCE3/PINK1/TRIM23/NXN/HERC1/FBXL5/SASH1/RNF11/ARNT/FBXO32/DTX3/KAT2B/IL33/UBE2T/ZBTB16/MYLIP/ASB2/MARCHF8/USP11/DCAF5/UNKL/FBXL17/ADRB2/TRIM6/FBXO31/LNPEP/MBD5…	BP
negative regulation of mitotic cell cycle phase transition	130/7182	235/17910	1.51197e-06	2.53325e-05	1.89404e-05	130	FBXL7/PKD2/DACT1/FOXN3/KANK2/BCL2/PRMT2/CTDSP2/FAM107A/CCL2/SEPTIN7/FHL1/GPNMB/DUSP1/NACC2/ZFP36L1/FBXO31/CDK1/TFDP2/PTEN/CCNB1/ATM/MAD2L1/RBL2/SLFN11/CHMP4C/BRSK1/PCNA/CDC20/CDKN1B/APC/PLK1/AURKB/CDC25C/EZH2/PSME2/FOXO4/CDT1/CTDSP1/PSMA5/BTG2/RGCC/E2F8/SFN/TAOK1/PSMD14/TTK/TNKS1BP1/CNOT6L/KLHL22/SKP1/TRIP13/CNOT4/NOP53/ZNF655/MUC1/USP47/CENPF/CLSPN/MRNIP/PSMB3/CNOT11/AURKA/PLAGL1/PSMB8/GJC2/ZNF3…	BP
regulation of vasculature development	218/7182	425/17910	1.51897e-06	2.54103e-05	1.89986e-05	218	RECK/ADGRA2/TEK/MAP3K3/MMRN2/DCN/CD34/PTPRM/EMILIN1/AKT3/TNFSF12/VEGFC/RHOJ/ENG/RAMP2/CYP1B1/PRKD1/TIE1/MEOX2/TBXA2R/SERPINF1/PTGIS/CDH5/GREM1/STAB1/ECSCR/HGF/ACVRL1/NRP1/COL4A2/VASH1/THBS4/HSPG2/APLNR/SPARC/TGFBR2/NPR1/GAB1/FGF2/SMOC2/FGF1/SFRP1/ABL1/SFRP2/ETS1/THBS1/HDAC5/PRKCB/SRPX2/BMPER/SASH1/PTN/KDR/RHOB/ISL1/HDAC7/STARD13/C3/FOXJ2/SULF1/MECP2/THBS2/HSPB6/TMEM100/GPNMB/ITGB1/MYOCD/PIK3R6/NG…	BP
inflammatory response	378/7182	784/17910	1.53439e-06	2.56286e-05	1.91618e-05	378	A2M/C1S/C1R/TEK/IL6ST/JAM3/SELP/SERPING1/PRKD1/IL1R1/CD200/SERPINF1/PTGIS/S1PR3/CYSLTR1/CDH5/NFATC4/STAB1/HGF/IGFBP4/AOC3/CAMK1D/STAT5B/RORA/C4A/F8/PDE2A/FOXF1/IL34/PTGER3/C7/HSPG2/CSF1R/TRIL/CDO1/NOD1/PJA2/LRP1/NDST1/CD81/F2R/SMO/CALCRL/TGFB1/RARRES2/C4B/EDNRB/LOXL3/SOCS5/PRCP/CFH/ETS1/THBS1/FOLR2/NRROS/KLRG1/HDAC5/LRRK2/P2RX7/TSPAN2/FCGR2B/CCL2/CSF1/NLRP1/CHST1/PLA2G4C/APOD/PTN/ISL1/IGF1/TPST1/…	BP
peptidyl-serine modification	138/7182	252/17910	1.55575e-06	2.59452e-05	1.93985e-05	138	DCN/RAMP3/MAP3K12/PRKD1/PLCL1/GALNT16/HGF/CREBL2/ANGPT1/PPM1F/BGN/BCL2/TTBK2/TGFBR2/DCLK2/PKD1/TGFB1/SFRP2/GAS6/LRRK2/PINK1/HIPK3/ILK/RASSF2/ATP2B4/DMD/TERF2IP/POGLUT3/PRKACA/TRIM6/PIK3CA/MAPKAP1/CDK1/TGFBR1/POGLUT2/EGFLAM/CCNB1/ATM/PLCL2/INPP5F/TXN/HCLS1/MKNK1/INPP5K/VRK1/PDE4D/MARK1/PDGFB/ARRB1/ROCK1/PLK1/PRKCE/AURKB/MAPK13/ULK1/CAV1/WNK1/PRKAA2/GALNT3/ARRB2/DYRK1A/BDKRB2/TTK/TNKS1BP1/SNCA/MORC…	BP
regulation of animal organ morphogenesis	137/7182	250/17910	1.61064e-06	2.68191e-05	2.00519e-05	137	CD34/GLI1/ENG/GPC6/PRICKLE1/DACT1/FZD4/DAB2/GREM1/AR/HGF/FGF7/RSPO3/ASPN/ROR2/FZD1/ANKRD6/BCL2/MAGI2/ROBO1/SOX17/BMPR2/TGFBR2/PRICKLE2/SMO/TGFB1/FGF1/SPRY1/SFRP1/ABL1/SFRP2/WNT2B/LIMS2/FGFR1/CSF1/ROR1/PTN/ISL1/FOXP2/FGF10/SULF1/CITED2/NFIB/FZD7/HAND2/BMPR1A/SNAI2/TGFBR1/DAAM1/CFLAR/SIX2/SAPCD2/TIAM1/NOG/BASP1/TWIST1/FZD2/FOXC2/PSME2/SOX9/CTHRC1/PSMA5/TBX2/ARRB2/RBPJ/PSMD14/TFAP2A/RXRA/SULF2/RSPO2…	BP
cation homeostasis	291/7182	588/17910	1.74486e-06	2.90093e-05	2.16894e-05	291	CYBRD1/S1PR1/CLIC2/SYNPO/RAMP3/PKD2/ITPR1/HTR2A/DLG4/EDNRA/S1PR3/LPAR1/CYSLTR1/TRPC1/CLIC4/SGCD/THY1/ATP1B2/ANK2/BCL2/C7/APLNR/CXCL12/PDGFRA/EPAS1/GNAI2/SLC39A13/LRP1/SLC22A17/NPR1/FYN/F2R/ADCY5/PKD1/FGF2/KCTD7/TGFB1/EDNRB/PRKN/ABL1/PTH1R/CCL14/LRRK2/PRKCB/ATP6V1G2/P2RX7/FBXL5/RASA3/SLC8A1/ATP2B4/CACNB2/KCNMA1/CACNA1C/DMD/CDH23/ITGAV/SCN7A/MYO5A/SYPL2/JPH2/PLN/AVPR1A/NCS1/C1QTNF1/DMPK/TRPC6/ADCYA…	BP
lung development	98/7182	169/17910	1.82451e-06	3.02869e-05	2.26446e-05	98	HEG1/PDGFRB/GLI1/TCF21/ZFPM2/CRISPLD2/IGFBP5/TGFB3/GLI3/GLI2/FGF7/FOXF1/BMPR2/SPARC/TGFBR2/PDGFRA/CCN2/EPAS1/FLT4/PKD1/FGF1/SPRY1/LOXL3/WNT2B/PGR/FGFR1/PTN/FOXP2/FGF10/NFIB/MYOCD/HSD11B1/RCN3/ADAMTS2/BMPR1A/PDPN/SRF/NOS3/ESRP2/LOX/TNC/ATXN1L/MMP14/GRHL2/HOXA5/CREB1/CIC/NOG/STK40/ID1/SIM2/ADAMTSL2/MAN1A2/SOX9/AGR2/FSTL3/RBPJ/RIDA/RSPO2/PKDCC/HHIP/SMPD3/SAV1/DLG5/YAP1/KLF2/AARD/WNT2/HS6ST1/SLC7A11/…	BP
vasculogenesis	52/7182	78/17910	1.83869e-06	3.04753e-05	2.27855e-05	52	QKI/HEG1/CD34/PDGFRB/ENG/RAMP2/TIE1/ZFPM2/FZD4/RASIP1/FOXF1/SOX17/APLNR/TGFBR2/SMO/TGFB1/GJC1/TGFBR3/ZMIZ1/KDR/SOX18/HDAC7/ITGAV/TMEM100/MYOCD/RAP1A/ACKR3/ZFP36L1/HEY2/EGFL7/CAV1/RAPGEF2/TEAD2/SPRED1/RASA1/JUNB/YAP1/HAS2/CCM2/EPHA2/WT1/CEACAM1/HIF1AN/HEY1/SETD2/XDH/NOTCH1/AGGF1/WARS2/NTRK2/NKX2-5/ITGB8	BP
regulation of leukocyte chemotaxis	66/7182	105/17910	1.97229e-06	3.26397e-05	2.44037e-05	66	JAM3/SLIT2/VEGFC/GREM1/CAMK1D/THBS4/CXCL12/RARRES2/DYSF/GAS6/THBS1/CCL2/CSF1/PTN/ANO6/DUSP1/C3AR1/BST1/CCL19/AIF1/SWAP70/NCKAP1L/CCN3/CCR2/MPP1/TNFSF14/ZNF580/CCR7/CMKLR1/GPSM3/C5AR1/WNK1/RIPOR2/CCR1/IL6R/F2RL1/DDT/C1QBP/NBL1/S100A14/TIRAP/TMEM102/LGMN/AKIRIN1/MIF/SERPINE1/MAPK14/GPR18/IL6/CXCL17/CCL21/KARS1/STK39/ADAM17/CXCL13/WNT5A/RAC1/SLAMF8/CCL4/MOSPD2/CALR/HMGB1/MDK/EDN1/MMP28/SLC8B1	BP
mitochondrion organization	236/7182	466/17910	1.98424e-06	3.27871e-05	2.45139e-05	236	SEPTIN4/DCN/AKT3/HGF/FEZ1/LEPROT/CTSK/BCL2/EPAS1/MEF2A/PRKN/LRRK2/PINK1/P2RX7/KDR/IGF1/PID1/CYCS/ATP5MC1/VAT1/WDR81/TFDP2/NOS3/CERT1/WDR35/ATP5MC3/MOAP1/SH3GLB1/SLC25A5/VPS13D/GABPA/MAP1LC3B/RAB29/RAB32/CLU/FLCN/TSC2/MAPT/PPP3CC/MTFP1/TREM2/TSPO/RNF41/ATP5IF1/CAMKK2/GGCT/APOO/MYO19/ATG14/MTFR1/ESRRA/NDUFB3/ATP5F1C/BIK/ATP5MF/USP30/ABLIM3/NDUFS3/STAT3/COA3/STAT2/MTFR2/ATP5F1B/VPS11/ARRB2/JUN/NRF1/…	BP
positive regulation of endothelial cell proliferation	67/7182	107/17910	2.01584e-06	3.32582e-05	2.48662e-05	67	TEK/AKT3/TNFSF12/PRKD1/ACVRL1/NRP1/THBS4/APLNR/CXCL12/BMPR2/FLT4/FGF2/DYSF/NRP2/FGFR1/KDR/ARNT/ITGB3/PPP1R16B/TGFBR1/GATA2/BMP6/ITGA4/HTR2B/CDH13/STAT5A/AGTR1/PLCG1/PDGFB/EGFL7/ZNF580/EGR3/STAT3/JUN/LRG1/SEMA5A/SIRT1/JCAD/HMGB2/PDCD6/CCL11/WNT2/MIR10B/NR4A1/PDPK1/SCG2/MIR132/MIR126/PRKCA/ANG/RPTOR/FGFBP1/HIF1A/CAV2/MIR27B/MIR23B/AGGF1/ADAM17/HMOX1/WNT5A/ECM1/AKT1/HMGB1/MYDGF/MDK/RICTOR/PLXNB3	BP
covalent chromatin modification	221/7182	433/17910	2.04993e-06	3.37691e-05	2.52482e-05	221	MAP3K12/PRKD1/APBB1/EID1/PPM1F/SKI/USP51/PRMT2/PRDM6/PHC1/EZH1/TGFB1/NAP1L2/PHF1/HDAC5/LRRK2/PRKCB/PINK1/SAP30L/PRDM5/JDP2/PRDM2/ISL1/HDAC7/KAT2B/NCOA1/MECP2/SATB1/CREBBP/EPC2/PER1/NACC2/MYOCD/LDB1/CDK1/SNAI2/ING4/SETMAR/GATA2/BCL6/CCNB1/ATM/SETD7/PHF2/PKN1/CCNA2/ATF7IP/ELK4/FLCN/VRK1/MORF4L1/KMT2A/EPC1/ARID4A/ARRB1/JADE2/ZNF304/AURKB/SIRT2/TWIST1/LEF1/SIRT7/EZH2/ASH1L/C6orf89/PRKAA2/SMYD1/AUTS2/…	BP
oxidation-reduction process	447/7182	944/17910	2.07922e-06	3.41994e-05	2.55699e-05	447	CYBRD1/IL6ST/C1QTNF2/LOXL1/CYP1B1/PTGIS/NFATC4/SOD3/CYGB/STAB1/AOC3/COX7A1/LEPR/CYP7B1/F8/CH25H/P3H3/ENOX1/SESN3/CYB5R3/TRABD2B/CDO1/FTO/ADGRF5/ALDH1A3/MSRB3/CMAHP/GPX8/PCDH12/DIO2/ISCU/LOXL3/CAVIN3/FAXDC2/AASS/PINK1/NXN/COX4I2/P4HA3/AOX1/PXDN/GFPT2/APOD/IGF1/PAM/FMO1/SORBS1/PID1/ADH1B/ABCD2/NOX4/DEGS1/PYGM/P3H1/MECP2/ACACB/GPX7/COX5A/SLC25A10/PPP1R3F/KCNAB1/CYCS/RNLS/STEAP4/KL/HSD11B1/PIK3CA/TXN…	BP
interspecies interaction between organisms	440/7182	928/17910	2.10737e-06	3.46097e-05	2.58766e-05	440	IL6ST/GUCY1A1/MPDZ/HTR2A/MDFIC/FBLN1/STOM/CD93/NFIA/MXRA8/ADARB1/VIM/BCL2/STING1/CXCL12/MID2/PDGFRA/GSN/TLN1/HCFC2/ATF7/FYN/CD81/TGFB1/AP1M1/PRKN/PIK3R1/CFH/NRP2/GAS6/CRTC3/TRIM23/P2RX7/FCGR2B/CCL2/NLRP1/ELMO1/CRTC1/KDR/ULK2/WASF2/LGALS1/ITGB3/ITSN1/KAT2B/ZYX/ITGAV/MECP2/SATB1/CREBBP/AXL/ITGB5/PACS1/ITGB1/TSPAN7/UVRAG/ACKR3/TBKBP1/TRIM6/HYAL2/AQP1/IL16/CD4/FN1/KPNA5/RNF216/CDK1/CD28/SELPLG/CAMLG/…	BP
activation of MAPK activity	87/7182	147/17910	2.13586e-06	3.48652e-05	2.60677e-05	87	MAPK10/MAP3K12/C1QTNF2/MDFIC/LPAR1/TGFB3/HGF/PEA15/NOD1/GHR/CD81/FGF2/FGF1/THBS1/ITGA1/LRRK2/P2RX7/IGF1/FGF10/CSPG4/SHC2/MAPK11/KIT/CDK1/CCL19/MAP3K20/TLR4/PKN1/SHC1/CXCR4/PAK3/TAB2/MAP3K21/MAP2K5/ARRB1/MAP3K6/C5AR1/MAP2K7/TAOK1/IQGAP3/INSR/TRAF6/MAP3K2/S1PR2/MAP4K5/CD40LG/PTPRC/MAP3K7/MAP3K9/INAVA/FPR1/PLCE1/TAOK2/MAPKAPK2/MAPK1/TGFA/TNFSF11/MUL1/RIPK1/MAP3K10/PTPN1/HACD3/MAPK14/MADD/FRS2/TAB1/E…	BP
cytokinesis	87/7182	147/17910	2.13586e-06	3.48652e-05	2.60677e-05	87	MYH10/ANKRD53/SNX18/KLHDC8B/RHOB/MAP9/SVIL/MYH9/UVRAG/RAB11FIP3/SNX33/KLHL13/SH3GLB1/LZTS2/CHMP4C/FLCN/CENPA/CENPV/APC/BBS4/MYO19/PLK1/PRKCE/CEP55/AURKB/ANLN/SNX9/KLHL21/KIF14/NUSAP1/ARL3/SPIRE1/KIF4A/E2F8/KIF13A/KIF23/ESPL1/RASA1/SPIRE2/RACGAP1/PIN1/CALM1/KIF20B/GIPC1/ECT2/KLHL9/SEPTIN6/RAB11FIP4/SON/PRC1/CHMP7/ZFYVE26/PIK3C3/CKAP2/CHMP3/BRCA2/CHMP1B/KIF20A/CHMP6/INCENP/RAB35/CIT/RAB11A/SETD2/E2…	BP
spindle organization	87/7182	147/17910	2.13586e-06	3.48652e-05	2.60677e-05	87	EML1/STARD9/SUN2/PKD1/ANKRD53/TACC1/CCDC69/MAP4/FLNA/MAP9/GNAI1/MECP2/MYH9/CHD3/CEP126/UVRAG/CEP120/POC1A/CCNB1/LZTS2/NEK7/CHMP4C/SPC25/CLASP1/EZR/CDC20/DCTN1/PLK1/RCC1/AURKB/NUMA1/ARHGEF10/DYNC1H1/KIF11/KNSTRN/KIF4A/TTK/ATRX/SPAG5/NEK2/KIF23/ESPL1/TPX2/CLASP2/AUNIP/ASPM/RACGAP1/SENP6/AURKA/STIL/MYBL2/KIFC1/CENPE/NDC80/TUBG1/STAG1/BCCIP/WDR62/PRC1/MLH1/RAN/TACC3/BORA/CHMP1B/PSRC1/RAB11A/TNKS/CHEK…	BP
cellular response to antibiotic	87/7182	147/17910	2.13586e-06	3.48652e-05	2.60677e-05	87	CYP1B1/HGF/MEF2C/ADCY5/ABL1/ETS1/LRRK2/PINK1/RHOB/GNAI1/KCNMB1/AXL/TRPC6/PDGFD/AQP1/CDK1/AIFM1/ADCY2/PTEN/FOXO1/TXN/CLU/PYCR1/PCNA/CDKN1B/ADCY3/PDGFB/SIRPA/PRKCE/ZNF580/MAPK13/EZH2/NR4A3/MAP1LC3A/HSPA5/SPI1/ADCY1/SIRT1/CYBB/TNFAIP3/PSAP/FDX1/AHR/EGR1/FOXO3/PPIF/ADCY7/MAPK7/SMPD3/ZC3H12A/MYB/ENDOG/ID3/ECT2/NQO1/KLF2/TP53INP1/SETX/PLA2G4F/STK26/STAT6/RELA/RIPK1/CST3/LCN2/KDM6B/JAGN1/NET1/TRAP1/PRKC…	BP
epidermal growth factor receptor signaling pathway	71/7182	115/17910	2.14939e-06	3.50331e-05	2.61932e-05	71	EFEMP1/GAB1/TGFB1/SPRY1/SOCS5/PIK3R1/ABL1/HIP1/ITGA1/DUSP3/RASSF2/FER/PIK3CA/CAMLG/EPS15/RNF115/CDH13/SHC1/SOS1/ARAP1/PLCG1/ADORA1/MVB12B/SOX9/AGR2/SHC3/PTPN3/PTK6/CBLC/AGT/FAM83B/ARHGEF7/PLCE1/APP/DOK1/PIK3C2A/CBL/ERBIN/VPS25/CEACAM1/BTC/TGFA/PIGR/NCK2/PDPK1/EPS15L1/STAM2/RNF126/GPRC5A/HIP1R/CHMP6/PTPN11/GAREM1/NCF1/ADRA2A/ADAM17/ERRFI1/CNOT9/IQGAP1/EPN1/GRB7/SNX5/SH3KBP1/GPER1/SNX6/AKT1/AREG/SR…	BP
DNA integrity checkpoint	84/7182	141/17910	2.1907e-06	3.56526e-05	2.66564e-05	84	FOXN3/PEA15/FBXO31/CDK1/MAP3K20/TFDP2/SETMAR/CCNB1/ATM/RBL2/FEM1B/XPC/BRSK1/PCNA/CDKN1B/CDC45/PLK1/CDC25C/FOXO4/CDT1/BTG2/RGCC/E2F8/SFN/TAOK1/TNKS1BP1/CNOT6L/CNOT4/NOP53/MUC1/DTL/CLSPN/MRNIP/CNOT11/AURKA/BRIP1/PLAGL1/ZNF385A/DNA2/GTSE1/CHEK1/CDK5RAP3/TIPIN/TAOK2/BRCA1/MDM4/ATF2/THOC5/H2AX/E2F1/CRY1/TICRR/GADD45A/CNOT8/MAPK14/DONSON/EIF2AK4/BRCC3/PTPN11/WAC/E2F7/PLK3/CHEK2/EP300/PML/ETAA1/GIGYF2/T…	BP
granulocyte chemotaxis	55/7182	84/17910	2.21271e-06	3.59565e-05	2.68836e-05	55	JAM3/SLIT2/CAMK1D/THBS4/ITGA9/RARRES2/DYSF/PIP5K1C/THBS1/ITGA1/CSF1/PREX1/PDE4B/C3AR1/BST1/JAML/CCL19/PIK3CD/NCKAP1L/PDE4D/MPP1/CCR7/CMKLR1/C5AR1/RIPOR2/CXCL3/CXADR/C1QBP/IL17RA/TGFB2/CCL11/ITGB2/HRH1/S100A14/TIRAP/AKIRIN1/SCG2/MAPK14/LGALS3/PIK3CG/CXCL17/IL17RC/CCL21/KARS1/CCL13/VAV1/GBF1/RAC1/MOSPD2/CKLF/ANXA1/MDK/EDN1/PLA2G1B/CSF3R	BP
regulation of DNA-binding transcription factor activity	219/7182	429/17910	2.23716e-06	3.62993e-05	2.71399e-05	219	MAPK10/PKD2/HEYL/CYP1B1/PRKD1/DDR2/CD200/PTGIS/FZD4/TCEAL7/GREM1/AR/GLIS2/PLPP3/CAMK1D/FZD1/FOXS1/STING1/MID2/NOD1/PRMT2/PRKCH/SMO/JMY/SFRP4/PKD1/TGFB1/GAS6/SUFU/HDAC5/PRKCB/PINK1/ROR1/CRTC1/FLNA/TERF2IP/FER/PPP2R5B/CARD8/MYOCD/MAPK11/ARID5B/HAND2/CYLD/KIT/PRNP/NLRP3/SRF/TLR4/EDA2R/CYTL1/PTEN/ERC1/TRIM15/CFLAR/TRIM22/CX3CR1/CLU/HCLS1/TRIM8/CD36/RAB7B/TAB2/RNF41/TRIM38/TRAF1/TNFSF4/MAP2K5/ARRB1/AR…	BP
mitotic cytokinesis	47/7182	69/17910	2.2731e-06	3.68269e-05	2.75344e-05	47	MYH10/ANKRD53/SNX18/KLHDC8B/RHOB/MAP9/SNX33/LZTS2/CHMP4C/CENPA/APC/BBS4/PLK1/CEP55/ANLN/SNX9/NUSAP1/ARL3/KIF4A/KIF23/ESPL1/RASA1/RACGAP1/KIF20B/ECT2/SEPTIN6/SON/CHMP7/ZFYVE26/CKAP2/CHMP3/BRCA2/CHMP1B/KIF20A/CHMP6/INCENP/RAB35/CIT/SPTBN1/STMN1/RHOA/JTB/CHMP5/UNC119/CHMP2B/CFL1/RHOC	BP
membrane invagination	41/7182	58/17910	2.28111e-06	3.69014e-05	2.75901e-05	41	RAB31/SYT11/MFGE8/GSN/SNX18/THBS1/ABCA1/FCGR2B/ELMO1/C3/MYH9/ANO6/AIF1/SNX33/GATA2/ITGAM/MSR1/DOCK1/NCKAP1L/CD36/TREM2/BIN2/AURKB/SNX9/SPIRE1/SPIRE2/F2RL1/ARHGAP25/ITGB2/SNX3/CD300A/FCER1G/FNBP1L/ARHGAP12/PPARG/FCGR1A/SH3BP1/BECN1/FCHO2/RHOA/XKR8	BP
regulation of epithelial cell migration	157/7182	294/17910	2.31384e-06	3.73747e-05	2.7944e-05	157	ADGRA2/TEK/MAP3K3/MMRN2/DCN/PTPRM/AKT3/SLIT2/VEGFC/RHOJ/PRKD1/MEOX2/TBXA2R/SERPINF1/ARSB/MCC/MEF2C/PLPP3/FGF7/ACVRL1/NRP1/ANGPT1/GLIPR2/PPM1F/VASH1/BMPR2/SPARC/TGFBR2/FLT4/AMOTL1/FGF2/SMOC2/TGFB1/NR2F2/FGF1/EVL/ABL1/NRP2/ETS1/THBS1/HDAC5/IQSEC1/SRPX2/FGFR1/MACF1/BMPER/SASH1/PTN/KDR/RHOB/HDAC7/MAPRE2/ITGB3/FGF10/STARD13/RAB25/ATOH8/MECP2/RTN4/FOXP1/TACR1/NOS3/GATA2/PTEN/ADAMTS9/CORO1C/STAT5A/DOCK1…	BP
semi-lunar valve development	29/7182	37/17910	2.34463e-06	3.78155e-05	2.82735e-05	29	ELN/EMILIN1/SLIT2/HEYL/SLIT3/NOTCH2/ROBO1/BMPR2/GJA5/TGFB1/SNAI2/NOS3/HEY2/NFATC1/ROCK1/DLL4/TNFRSF1A/TWIST1/SOX9/RBPJ/SNAI1/GATA3/TGFB2/TNFRSF1B/HEY1/NOTCH1/EFNA1/ROCK2/JAG1	BP
regulation of DNA metabolic process	207/7182	403/17910	2.44832e-06	3.9429e-05	2.94799e-05	207	PDGFRB/GLI1/APBB1/GREM1/HGF/GLI2/ACVRL1/BMPR2/USP51/FGF2/SMOC2/TGFB1/FGFR1/TINF2/FAM168A/FGF10/NOX4/TERF2IP/MECP2/TSPYL2/DUSP1/SMG6/KCNK2/PIK3CA/CDK1/CD28/SETMAR/AIFM1/BCL6/ATM/CCDC88A/SLFN11/NEK7/ZBTB38/GJA1/CCNA2/ATF7IP/ESCO2/FLCN/GRHL2/DKC1/IL7R/PCNA/PAK3/MIS18A/KMT2A/PARM1/PDGFB/TNFSF4/ZNF304/AURKB/TWIST1/RAD51AP1/CTC1/GNL3/POLQ/KLHL15/CDT1/SPIRE1/GMNN/PARPBP/ARRB2/TNKS2/JUN/WIZ/MAP2K7/RGCC/E…	BP
negative regulation of cytokine production	155/7182	290/17910	2.50258e-06	4.02427e-05	3.00883e-05	155	LRRC32/CD34/CD200/SYT11/TGFB3/SSC5D/HGF/NAV3/ANGPT1/TGFB1/TWSG1/SOCS5/GAS6/THBS1/FGFR1/FCGR2B/APOD/IGF1/HDAC7/ABCD2/IL33/GPNMB/AXL/CARD8/CYLD/FN1/RNF216/MERTK/PRNP/NLRP3/MAPKBP1/TLR4/BCL6/PTPRS/NPTN/RNF135/HOMER3/CD84/CX3CR1/NCKAP1L/LILRA4/RNF128/VSIR/EZR/TREM2/TSPO/RNF125/TNFSF4/VSIG4/SIRPA/MAP2K5/ARRB1/TYROBP/ASB1/CD83/TWIST1/LEF1/NDRG2/LILRB1/CMKLR1/ZFP36/MIR125B1/JAK3/ARRB2/RGCC/DLL1/OTUD5/TR…	BP
ion homeostasis	326/7182	669/17910	2.51875e-06	4.04425e-05	3.02377e-05	326	CYBRD1/S1PR1/CLIC2/SYNPO/DCN/RAMP3/PKD2/ITPR1/HTR2A/DLG4/EDNRA/S1PR3/LPAR1/CYSLTR1/TRPC1/CLIC4/SGCD/THY1/ATP1B2/ANK2/BCL2/C7/APLNR/CXCL12/PDGFRA/GJA5/EPAS1/GNAI2/SCN2B/SLC39A13/LRP1/SLC22A17/NPR1/FYN/F2R/SFRP4/ADCY5/PKD1/SCN1B/FGF2/KCTD7/TGFB1/EDNRB/PRKN/ABL1/PTH1R/CCL14/LRRK2/ABCA1/PRKCB/ATP6V1G2/P2RX7/FHL1/FBXL5/KDR/RASA3/SLC8A1/ATP2B4/CACNB2/KCNMA1/CACNA1C/DMD/CDH23/ITGAV/SCN7A/MYO5A/SYPL2/JPH…	BP
calcium ion homeostasis	200/7182	388/17910	2.65585e-06	4.25804e-05	3.18361e-05	200	S1PR1/CLIC2/SYNPO/RAMP3/PKD2/ITPR1/HTR2A/DLG4/EDNRA/S1PR3/LPAR1/CYSLTR1/TRPC1/SGCD/THY1/ANK2/BCL2/APLNR/CXCL12/PDGFRA/LRP1/FYN/F2R/ADCY5/PKD1/FGF2/TGFB1/EDNRB/ABL1/PTH1R/CCL14/PRKCB/P2RX7/RASA3/SLC8A1/ATP2B4/CACNB2/CACNA1C/DMD/CDH23/ITGAV/MYO5A/SYPL2/JPH2/PLN/AVPR1A/NCS1/C1QTNF1/DMPK/TRPC6/ADCYAP1/PRKACA/AKAP6/KL/RIC3/C3AR1/CD4/TACR1/CCL19/ATP1A2/PRNP/CACNA2D1/ADCYAP1R1/GATA2/SV2A/ABL2/F2RL3/HTR2…	BP
cell cycle checkpoint	111/7182	197/17910	2.68801e-06	4.30321e-05	3.21738e-05	111	FOXN3/PEA15/TGFB1/ZWINT/DUSP1/WNT9A/FBXO31/CDK1/MAP3K20/TFDP2/SETMAR/CCNB1/ATM/MAD2L1/RBL2/FEM1B/XPC/CHMP4C/BRSK1/PCNA/CDC20/CDKN1B/APC/CHFR/CDC45/PLK1/BUB1/AURKB/CDC25C/BUB1B/FOXO4/CDT1/BTG2/RGCC/E2F8/SFN/TAOK1/TTK/TNKS1BP1/CNOT6L/KLHL22/TRIP13/CNOT4/NOP53/MUC1/DTL/CENPF/CLSPN/MRNIP/CNOT11/AURKA/BRIP1/PLAGL1/ZNF385A/DNA2/NDC80/ZWILCH/GTSE1/CHEK1/CDK5RAP3/TIPIN/TAOK2/BRCA1/MDM4/ATF2/THOC5/H2AX/E2…	BP
stem cell differentiation	130/7182	237/17910	2.74958e-06	4.38875e-05	3.28134e-05	130	A2M/ZEB2/PRICKLE1/EDNRA/FAM172A/GREM1/MEOX1/MEF2C/FRZB/NRP1/FZD1/LTBP3/SOX17/PDGFRA/SMO/LBH/EDNRB/SFRP1/ABL1/NRP2/PTN/ISL1/SOX18/EPCAM/MYOCD/HAND2/FBXL17/TRIM6/TAL1/LDB1/SOX5/KIT/FN1/BMPR1A/SNAI2/SRF/GATA2/HTR2B/RBM24/HOXB4/CORO1C/OVOL2/OSR1/KMT2A/LMO1/TWIST1/FOXC2/PSME2/STAT3/FOXO4/TEAD2/SOX9/PSMA5/TBX2/EOMES/RBPJ/PSMD14/LMO2/GATA3/N4BP2L2/SMAD4/PSMB3/PDCD6/PSMB8/MYB/PTPRC/TAPT1/TGFB2/SEMA3C/YAP…	BP
cellular response to oxygen levels	130/7182	237/17910	2.74958e-06	4.38875e-05	3.28134e-05	130	CD34/PTGIS/LPAR1/RORA/BCL2/EPAS1/SFRP1/PINK1/COX4I2/PTN/ARNT/SLC8A1/CITED2/CREBBP/KCNMB1/TRPC6/ZFP36L1/AQP1/KCNK2/VASN/AIFM1/PTEN/CCNB1/FOXO1/CCNA2/CFLAR/SLC2A4/ERO1A/S100B/KCNK3/PRKCE/SIRT2/TWIST1/CAV1/PSME2/PSMA5/RGCC/RBPJ/DDAH1/PSMD14/SIRT1/CPEB2/CYBB/NOP53/EGR1/FOXO3/PSMB3/CHCHD2/BRIP1/PSMB8/BNIP3L/ENDOG/ATG7/SUV39H1/STC1/CACNB3/PMAIP1/EEF2K/HP1BP3/HIF3A/EGLN1/PICK1/PSMA4/EIF4EBP1/MDM4/CBL/CP…	BP
regulation of lymphocyte differentiation	95/7182	164/17910	2.77724e-06	4.42635e-05	3.30945e-05	95	GLI3/ZEB1/GLI2/STAT5B/TGFBR2/HLX/TGFB1/SFRP1/LOXL3/SOCS5/ABL1/GAS6/ZMIZ1/ZBTB16/ITPKB/AXL/PIK3R6/ZFP36L1/CYLD/TMEM131L/CD28/CCL19/NLRP3/BCL6/DTX1/TESPA1/IL4R/NCKAP1L/MMP14/NFATC2/IL7R/SOS1/CR1/VSIR/CCR2/RNF41/TNFSF4/CD83/EGR3/CD86/ZBTB1/JAK3/ATP11C/INHBA/LILRB2/GATA3/BTK/ZC3H12A/MYB/PTPRC/NFAM1/ZFP36L2/SMAD7/PNP/HMGB3/FOXP3/FANCA/FANCD2/ZAP70/CD46/SH3RF1/SASH3/FCRL3/CD2/PRKCZ/RUNX1/INPP5D/PRELID1…	BP
regulation of cell division	94/7182	162/17910	2.82851e-06	4.50141e-05	3.36558e-05	94	VEGFC/TGFB3/FGF7/THBS4/SOX17/TXNIP/VEGFB/FGF2/LBH/TGFB1/FGF1/NAP1L2/ANKRD53/SFRP2/PDGFC/PTN/MAP9/SVIL/KDF1/PDGFD/UVRAG/TAL1/RAB11FIP3/HTR2B/KLHL13/RBL2/SH3GLB1/PGF/CHMP4C/ORC6/FLCN/EVI2B/PDGFB/CENPV/BBS4/MYO19/PLK1/PRKCE/PTCH1/AURKB/SIRT2/KLHL21/KIF14/E2F8/SFN/DLL1/KIF13A/KIF18B/KIF23/ASPM/RACGAP1/CAT/PIN1/CALM1/KIF20B/TGFB2/GIPC1/ECT2/KLHL9/ITGB1BP1/SUSD2/RAB11FIP4/PRC1/BTC/TGFA/ZFYVE26/CIB1/PIK…	BP
response to inorganic substance	263/7182	528/17910	2.88301e-06	4.5814e-05	3.42538e-05	263	FBLN5/CYBRD1/MAPK10/GUCY1B1/PKD2/PDGFRB/FIBIN/DLG4/CYP1B1/SERPINF1/APBB1/BACE1/NFATC4/SOD3/TRPC1/HGF/MEF2C/CLIC4/BCL2/MAP1B/SPARC/ADD1/GSN/SLC39A13/GNAO1/SELENOM/FYN/MEF2A/TXNIP/PRKN/ABL1/ETS1/MTR/THBS1/CRYAB/LRRK2/NSMCE3/PINK1/CACNA1H/P2RX7/DLG2/KDR/RHOB/SLC8A1/ATP2B4/PAM/KCNMA1/COL18A1/ITPKB/PLN/AVPR1A/AXL/DUSP1/TRPC6/PDGFD/AQP1/KIT/CD14/CDK1/VCAM1/TACR1/SIPA1/CCL19/PRNP/RASGRP2/SEC31A/NOS3/BMP…	BP
regulation of mitotic cell cycle phase transition	218/7182	428/17910	2.8884e-06	4.58321e-05	3.42673e-05	218	FBXL7/PKD2/DACT1/FOXN3/KANK2/BCL2/PBX1/TUBA1A/PRMT2/SMARCD3/UBE2E2/PKD1/ADAMTS1/TGFB1/CTDSP2/FAM107A/CCL2/SEPTIN7/FHL1/FGF10/HSPA2/MECP2/GPNMB/RDX/PRKAR2B/DUSP1/NACC2/PRKACA/ZFP36L1/FBXO31/PAFAH1B1/CDK1/AIF1/TFDP2/HMMR/PTEN/CCNB1/ATM/HECW2/MAD2L1/RBL2/PKIA/SLFN11/XPC/CHMP4C/BRSK1/ACTR1A/PLK4/CLASP1/PCNA/CDC20/TUBB4B/DLGAP5/CDKN1B/APC/KCNA5/DCTN1/PLK1/AURKB/SIRT2/ANLN/CDC25C/EZH2/PSME2/UBE2C/CTC1/…	BP
protein acylation	128/7182	233/17910	2.94453e-06	4.66542e-05	3.4882e-05	128	APBB1/EID1/CLIP3/TGFB1/NAP1L2/ISL1/TERF2IP/KAT2B/ZDHHC17/NCOA1/MECP2/CREBBP/EPC2/PER1/MYOCD/LDB1/SNAI2/ING4/GATA2/FOXO1/ESCO2/FLCN/ABHD17C/MAPT/PPM1A/MORF4L1/ZDHHC12/KMT2A/EPC1/ARRB1/JADE2/TWIST1/LEF1/NUPR1/PRKAA2/TAOK1/AUTS2/SNCA/SPI1/PHF10/SGF29/SIRT1/KAT8/CAMK1/USP22/GATA3/MUC1/SMAD4/RAPGEF3/KAT5/ARNTL/ABHD17A/KANSL3/NMT2/PHF20/TADA2B/MAP3K7/TAF1/MSL2/MDH2/DPF2/FOXP3/KANSL1L/KLF15/ZDHHC8/ZDHHC…	BP
regulation of myeloid cell differentiation	136/7182	250/17910	2.97007e-06	4.69897e-05	3.51329e-05	136	FBN1/MEF2C/STAT5B/RBFOX2/MAFB/ROR2/NOTCH2/IL34/LRRC17/MEIS1/TGFB1/SFRP1/MITF/PIK3R1/ETS1/THBS1/PRKCB/CSF1/ARNT/RASSF2/KLF10/KAT2B/AGO3/MYL9/ZBTB16/ITPKB/CREBBP/NME1/TFE3/ZFP36L1/TAL1/LDB1/FES/FOXP1/TNRC6C/CD4/TNRC6A/ZBTB46/AGO4/GATA2/LOX/TLR4/TNRC6B/GABPA/NCKAP1L/HCLS1/EVI2B/HOXA5/ACVR2A/CREB1/TREM2/RAB7B/KMT2A/RNF41/KLF13/TYROBP/ESRRA/LEF1/LILRB1/NR4A3/NFKBIA/STAT3/ZFP36/MIR125B1/JUN/FSTL3/DLL1/…	BP
inorganic ion homeostasis	295/7182	600/17910	2.98406e-06	4.7142e-05	3.52467e-05	295	CYBRD1/S1PR1/CLIC2/SYNPO/RAMP3/PKD2/ITPR1/HTR2A/DLG4/EDNRA/S1PR3/LPAR1/CYSLTR1/TRPC1/CLIC4/SGCD/THY1/ATP1B2/ANK2/BCL2/C7/APLNR/CXCL12/PDGFRA/EPAS1/GNAI2/SLC39A13/LRP1/SLC22A17/NPR1/FYN/F2R/SFRP4/ADCY5/PKD1/FGF2/KCTD7/TGFB1/EDNRB/PRKN/ABL1/PTH1R/CCL14/LRRK2/PRKCB/ATP6V1G2/P2RX7/FBXL5/RASA3/SLC8A1/ATP2B4/CACNB2/KCNMA1/CACNA1C/DMD/CDH23/ITGAV/SCN7A/MYO5A/SYPL2/JPH2/PLN/AVPR1A/NCS1/C1QTNF1/DMPK/TRPC6…	BP
translational termination	63/7182	100/17910	2.99584e-06	4.7259e-05	3.53342e-05	63	MRPL12/MRPL23/MRPL52/APEH/MRPL48/MRPS5/MRPL27/MRPL3/EIF5A/MRPL15/MRPS34/MRPL13/MRPS2/AURKAIP1/MRPL37/PTCD3/MRPS12/MRPL58/MRPL50/MRPL44/EIF5AL1/MRPL17/CHCHD1/MRPL16/MRPL35/MRPL36/MRPL22/MRPL14/MRPL41/MRPS28/MRPL21/MRPS9/MRPS25/MTRF1/MRPS15/MRPS26/MRPL18/MRPS14/MRRF/MRPL32/MRPS33/MRPL2/MRPL57/MRPS17/MRPS23/MRPS35/MRPL19/MRPS30/ERAL1/MRPS7/MRPL11/MRPS18B/MRPL4/MRPL45/MRPL20/MRPL39/MRPL51/MRPS22/MRPS…	BP
purine nucleoside triphosphate metabolic process	169/7182	321/17910	3.05716e-06	4.81559e-05	3.60048e-05	169	HTR2A/RHOQ/FAM20C/GIMAP7/TGFB1/ISCU/LRRK2/PINK1/P2RX7/PRXL2C/IGF1/ARNT/ZBTB20/PID1/MECP2/COX5A/NME1/ADCYAP1/RAB23/CDK1/MOCS1/ATP5MC1/ATP1A2/COX6A1/PRKAG2/ATP5MC3/CCNB1/UQCRH/SLC25A12/FLCN/COX5B/CBFA2T3/UQCRC1/COA6/TREM2/TSPO/SAMHD1/ATP5IF1/ATP1B1/AMPD3/NDUFB3/ATP5F1C/CYC1/ATP5MF/NDUFS3/STAT3/NUPR1/PRKAA2/ATP5F1B/COX8A/UQCRQ/TPI1/UQCC3/ITPA/NUP37/SHMT2/SNCA/COX6B1/MOCOS/HDAC4/ATP5ME/NUDT15/JMJD8/E…	BP
branching morphogenesis of an epithelial tube	86/7182	146/17910	3.19282e-06	5.02195e-05	3.75476e-05	86	PKD2/SLIT2/TCF21/DCHS1/ENG/EDNRA/NFATC4/GREM1/AR/GLI3/FAT4/GLI2/CLIC4/NRP1/RASIP1/FOXF1/BCL2/PBX1/TGFBR2/SMO/PKD1/NOTCH4/FGF2/TGFB1/FGF1/SPRY1/ABL1/SFRP2/WNT2B/PGR/CSF1/ILK/FGF10/COL4A1/PLXND1/SRF/ESRP2/TNC/PGF/SIX2/MMP14/HOXA5/NOG/DLL4/PTCH1/FOXC2/SOX9/RSPO2/HHIP/SMAD4/DLG5/CCL11/YAP1/BTRC/ACVR1/AGT/DDR1/WNT2/ADAMTS16/EPHA2/WT1/FOXA1/LAMA5/PPP1CA/GNA13/HOXB7/HOXA11/TACSTD2/PML/TIMELESS/FKBPL/MSX…	BP
lamellipodium organization	52/7182	79/17910	3.28687e-06	5.16234e-05	3.85973e-05	52	S1PR1/SLIT2/ARHGEF6/PLEKHO1/SNX1/WASF2/P2RY12/VCL/FER/ITGB1/KIT/PDPN/CCDC88A/CORO1C/CDH13/SNX2/ENPP2/WASF1/ARPIN/MTSS2/ABLIM3/PARVB/ARFIP2/AUTS2/WASF3/HDAC4/BRK1/KANK1/ARHGEF7/SRGAP2/NCK1/EPHA2/SH2B1/CARMIL1/AKIRIN1/NCK2/TWF2/ATP7A/WAS/WHAMM/DNM2/CARMIL2/NUP85/RAC1/FSCN1/CORO1B/SRC/RHOD/CYFIP1/VIL1/PLXNB3/ARHGEF4	BP
regulation of intracellular transport	205/7182	400/17910	3.32162e-06	5.20009e-05	3.88796e-05	205	HTR2A/MDFIC/DAB2/EHD2/BACE1/GLI3/STOM/FEZ1/LEPROT/ANGPT1/MSN/PKIG/FOXF1/MAP1B/FYN/CD81/SMO/TGFB1/RIPOR1/PRKN/PIK3R1/GAS6/GAS1/SUFU/CRYAB/LRRK2/PRKCB/PINK1/VAMP2/APOD/GRIK5/CACNB2/FLNA/ARHGAP1/KCNB1/PLN/OAZ2/NCS1/RDX/BVES/RAP1A/RAB23/PRKACA/CHRM2/HYAL2/FES/REEP1/REEP2/PRNP/PTPN14/GATA2/RUFY3/ITGAM/PPP1R12A/PKIA/SH3GLB1/DNAJC27/INPP5F/TXN/IL4R/RAB29/CD84/SLC2A4/HCLS1/RAB3GAP1/CD36/NEDD4/CNR1/INPP5K…	BP
ERBB signaling pathway	82/7182	138/17910	3.32511e-06	5.20009e-05	3.88796e-05	82	EFEMP1/GAB1/TGFB1/SPRY1/SOCS5/PIK3R1/ABL1/HIP1/ITGA1/DUSP3/RASSF2/FER/RTN4/PIK3CA/CAMLG/EPS15/MATK/RNF115/CDH13/SHC1/SOS1/ARAP1/PLCG1/ADORA1/MVB12B/SOX9/AGR2/RBPJ/SHC3/PTPN3/PTK6/ERBB3/MYOC/CBLC/AGT/FAM83B/ARHGEF7/PLCE1/APP/HSP90AA1/DOK1/PIK3C2A/CBL/ERBIN/MAPK1/VPS25/CEACAM1/BTC/TGFA/LGMN/PIGR/NCK2/PDPK1/EPS15L1/STAM2/RNF126/GPRC5A/HIP1R/CHMP6/PTPN11/PRKCA/GAREM1/NCF1/STUB1/ADRA2A/ADAM17/ERRFI1/C…	BP
metal ion homeostasis	264/7182	531/17910	3.32536e-06	5.20009e-05	3.88796e-05	264	CYBRD1/S1PR1/CLIC2/SYNPO/RAMP3/PKD2/ITPR1/HTR2A/DLG4/EDNRA/S1PR3/LPAR1/CYSLTR1/TRPC1/SGCD/THY1/ATP1B2/ANK2/BCL2/C7/APLNR/CXCL12/PDGFRA/EPAS1/GNAI2/SLC39A13/LRP1/SLC22A17/NPR1/FYN/F2R/ADCY5/PKD1/FGF2/KCTD7/TGFB1/EDNRB/PRKN/ABL1/PTH1R/CCL14/PRKCB/P2RX7/FBXL5/RASA3/SLC8A1/ATP2B4/CACNB2/KCNMA1/CACNA1C/DMD/CDH23/ITGAV/SCN7A/MYO5A/SYPL2/JPH2/PLN/AVPR1A/NCS1/C1QTNF1/DMPK/TRPC6/ADCYAP1/PRKACA/STEAP4/HYAL…	BP
response to nerve growth factor	34/7182	46/17910	3.33948e-06	5.21462e-05	3.89882e-05	34	MAGI2/PTN/RAPGEF1/RAP1A/PTEN/STMN2/KIDINS220/DYNC1LI2/MAPT/CREB1/WASF1/ID1/RAPGEF2/TAC1/HSPA5/KIF1B/FOXO3/EEF2/EEF2K/APP/CBL/E2F1/CIB1/PDPK1/RPL8/RAB35/ACAP2/ARPC3/CORO1A/MICALL1/EHD1/SORT1/AKT1/CRK	BP
negative regulation of immune effector process	71/7182	116/17910	3.37625e-06	5.26442e-05	3.93605e-05	71	A2M/SERPING1/TGFB3/ANGPT1/FOXF1/HLX/TGFB1/LOXL3/SOCS5/HTRA1/FCGR2B/FGL2/IL33/FER/DUSP22/PPP3CB/BCL6/IL4R/CD84/IL7R/CR1/CCR2/TRIM38/RNF125/TNFSF4/VSIG4/CD59/LILRB1/JAK3/ARRB2/SEC14L1/C1QBP/ZC3H12A/NLRX1/PTPRC/TGFB2/CUEDC2/SMAD7/FOXP3/CD96/HAVCR2/CEACAM1/FCRL3/MUL1/TSPAN6/CD300A/LGALS3/TMBIM6/FOXJ1/IRAK3/HLA-E/C4BPB/TKFC/CLEC4G/GRN/ZBTB7B/DHX58/HMOX1/ILRUN/SLAMF8/RPS19/GPATCH3/ABR/APPL1/TRAF3IP1/RC…	BP
platelet degranulation	77/7182	128/17910	3.41599e-06	5.3187e-05	3.97663e-05	77	A2M/PECAM1/VEGFC/SELP/SERPING1/ISLR/TGFB3/TIMP3/HGF/F8/VWF/SPARC/TLN1/MMRN1/LHFPL2/VEGFB/TGFB1/RARRES2/GAS6/THBS1/ITIH3/IGF1/ACTN1/ITGB3/FLNA/VCL/MAGED2/PROS1/CLEC3B/TIMP1/FN1/SELENOP/F13A1/PCDH7/PHACTR2/CLU/CD36/PDGFB/VTI1B/MANF/HABP4/CFD/ANXA5/STXBP2/PSAP/ENDOD1/SRGN/CALM1/ACTN2/ALDOA/TGFB2/OLA1/APP/TMX3/CD63/CD109/RAB27B/LEFTY2/TOR4A/TUBA4A/TAGLN2/CTSW/SERPINE1/FCER1G/ORM2/STXBP1/SOD1/TMSB4X/T…	BP
oxoacid metabolic process	509/7182	1091/17910	3.45204e-06	5.36708e-05	4.01281e-05	509	CYP2U1/QKI/HACD4/GGT5/DCN/CSGALNACT2/HTR2A/C1QTNF2/LUM/CYP1B1/CRTAP/OMD/PTGIS/ARSB/PRELP/BHMT2/CYGB/ITIH5/HGF/OGN/CYP7B1/CHST7/ANGPT1/CH25H/BGN/CYB5R3/CHSY3/VCAN/CDO1/DSEL/DSE/ASPA/NDST1/ALDH1A3/FGF2/TGFB1/ST3GAL3/CHST12/AASS/MTR/FOLR2/PPM1K/CHST14/ITIH3/P2RX7/PRXL2C/GFPT2/CHST1/PLA2G4C/IGF1/TPST1/ARNT/ZBTB20/ATP2B4/PAM/ABCD2/NOX4/C3/DEGS1/MYO5A/MECP2/ACACB/CSPG4/OAZ2/AVPR1A/CREM/PRKAR2B/NAGK/HYA…	BP
interleukin-12 production	39/7182	55/17910	3.56153e-06	5.52933e-05	4.13412e-05	39	THBS1/ISL1/MAPK11/FOXP1/CCL19/TLR4/CD36/TNFSF4/HSPD1/CCR7/LILRB1/CMKLR1/JAK3/ARRB2/TRAF6/LILRA5/SLAMF1/C1QBP/CD40LG/PLCB1/TIRAP/TIGIT/TLR2/IRF5/LTB/RELA/MAPK14/NFKB1/PRKCD/IRAK3/IRF1/AGER/CD40/MAST2/LEP/HMGB1/RIPK2/IDO1/MDK	BP
response to steroid hormone	193/7182	374/17910	3.59023e-06	5.56588e-05	4.16145e-05	193	IGFBP7/PLPP1/NR3C1/NR2F1/SLIT2/TCF21/FIBIN/HEYL/ENG/RAMP2/SERPINF1/DAB2/TGFB3/AR/SLIT3/ZNF366/RORA/RBFOX2/CYP7B1/KANK2/CREBRF/CALCOCO1/KLF9/BCL2/SPARC/CDO1/TGFBR2/CCN2/PRMT2/TGFB1I1/LMO3/TXNIP/LBH/TGFB1/NR2F2/SFRP1/THBS1/PGR/FAM107A/CRY2/PTN/ISL1/PAM/FBXO32/NCOA1/AVPR1A/PER1/DUSP1/RARB/ADCYAP1/ZFP36L1/AQP1/FOXP1/TACR1/AIF1/ATP1A2/BMP6/LOX/AIFM1/COL1A1/UFSP2/FOXO1/GOT1/CFLAR/AKAP13/RXRG/RNF14/NEDD…	BP
negative regulation of molecular function	511/7182	1096/17910	3.61453e-06	5.59553e-05	4.18361e-05	511	RECK/A2M/CLIC2/TIMP2/HEG1/RAMP3/PKD2/SLIT2/HEYL/CYP1B1/PAPLN/DACT1/CD200/PTGIS/DAB2/REM1/TCEAL7/NFATC4/TIMP3/GLIS2/ITIH5/HGF/FRY/WWTR1/AOC3/THY1/LEPR/C4A/COL6A3/DKK3/ADARB1/GEM/RASIP1/PPM1F/CNN3/TTBK2/FOXS1/GNAI2/PRMT2/SMPD1/SMO/SFRP4/LATS2/PKD1/TXNIP/CRIM1/NR2F2/PIK3IP1/DYSF/C4B/MARF1/EDNRB/SPRY1/SFRP1/SH2B3/SOCS5/PRKN/ABL1/SFRP2/ZFYVE1/GAS6/THBS1/SUFU/CRYAB/DUSP26/LRRK2/ITIH3/HIPK3/CRY2/DLG2/IL…	BP
positive regulation of cytosolic calcium ion concentration	138/7182	255/17910	3.65567e-06	5.65111e-05	4.22517e-05	138	S1PR1/CLIC2/SYNPO/RAMP3/PKD2/ITPR1/HTR2A/DLG4/EDNRA/S1PR3/LPAR1/CYSLTR1/TRPC1/THY1/ANK2/BCL2/APLNR/PDGFRA/LRP1/FYN/F2R/ADCY5/PKD1/FGF2/TGFB1/EDNRB/ABL1/PTH1R/P2RX7/RASA3/SLC8A1/ATP2B4/CACNB2/CACNA1C/DMD/ITGAV/MYO5A/JPH2/PLN/AVPR1A/C1QTNF1/TRPC6/ADCYAP1/PRKACA/AKAP6/RIC3/C3AR1/CD4/TACR1/CCL19/ATP1A2/PRNP/CACNA2D1/ADCYAP1R1/GATA2/ABL2/F2RL3/HTR2B/BDKRB1/SWAP70/NPTN/GJA1/GSTM2/AGTR1/TPCN1/CASQ2/CD36…	BP
nucleoside triphosphate metabolic process	176/7182	337/17910	3.70518e-06	5.71944e-05	4.27626e-05	176	HTR2A/RHOQ/FAM20C/GIMAP7/TGFB1/ISCU/LRRK2/PINK1/P2RX7/PRXL2C/IGF1/ARNT/ZBTB20/PID1/MECP2/COX5A/NME1/ADCYAP1/RAB23/CDK1/MOCS1/ATP5MC1/ATP1A2/COX6A1/PRKAG2/ATP5MC3/CCNB1/UQCRH/SLC25A12/FLCN/COX5B/CBFA2T3/UQCRC1/COA6/DTYMK/TREM2/TSPO/SAMHD1/ATP5IF1/ATP1B1/AMPD3/NDUFB3/ATP5F1C/CYC1/ATP5MF/NDUFS3/STAT3/NUPR1/PRKAA2/ATP5F1B/COX8A/UQCRQ/TPI1/UQCC3/ITPA/NUP37/SHMT2/SNCA/COX6B1/MOCOS/HDAC4/ATP5ME/NUDT15/J…	BP
regulation of angiogenesis	197/7182	383/17910	3.77476e-06	5.81853e-05	4.35034e-05	197	RECK/ADGRA2/TEK/MAP3K3/MMRN2/DCN/CD34/PTPRM/EMILIN1/AKT3/TNFSF12/RHOJ/ENG/RAMP2/CYP1B1/PRKD1/TIE1/MEOX2/TBXA2R/SERPINF1/PTGIS/CDH5/GREM1/STAB1/ECSCR/HGF/ACVRL1/NRP1/COL4A2/VASH1/THBS4/HSPG2/APLNR/SPARC/TGFBR2/NPR1/GAB1/FGF2/SMOC2/FGF1/SFRP1/ABL1/SFRP2/ETS1/THBS1/HDAC5/PRKCB/SRPX2/BMPER/SASH1/PTN/KDR/RHOB/ISL1/HDAC7/STARD13/C3/FOXJ2/SULF1/MECP2/THBS2/HSPB6/GPNMB/ITGB1/PIK3R6/NGFR/AQP1/PPP1R16B/PLX…	BP
regeneration	109/7182	194/17910	3.93849e-06	6.06225e-05	4.53256e-05	109	JAM3/GLI1/CPQ/HGF/GLI3/PRRX1/THY1/BCL2/MAP1B/CXCL12/TGFBR2/LAMB2/GSN/LRP1/CD81/TGFB1/DYSF/RGMA/GAS6/MTR/SGCA/TGFBR3/MATN2/APOD/PTN/ISL1/IGF1/FGF10/SCARF1/AXL/FZD7/RAP1A/CDK1/NNMT/PTGFRN/TNC/WDR35/PTPRS/PTEN/CCNB1/PGF/GJA1/CCNA2/INPP5F/CFLAR/LARGE1/CCN3/PCNA/TSPO/CDKN1B/PTCH1/SRSF5/NINJ1/ULK1/EZH2/NR4A3/KLF5/C5AR1/EPHA4/POSTN/JUN/ATIC/SULF2/PTPN3/PHB/BCL9/AURKA/NDEL1/PPAT/MYMX/PPP3CA/TYMS/YAP1/ANX…	BP
B cell activation	119/7182	215/17910	3.97252e-06	6.10592e-05	4.56522e-05	119	MEF2C/STAT5B/NOTCH2/BCL2/GPR183/DOCK11/CD81/TGFB1/SFRP1/PIK3R1/ABL1/ITM2A/HDAC5/PRKCB/FCGR2B/LGALS1/DOCK10/ITGB1/ZFP36L1/CYLD/KIT/VCAM1/CD28/TLR4/BCL6/ITGA4/ATM/PIK3CD/SWAP70/PKN1/PLCL2/NCKAP1L/MMP14/NFATC2/LYL1/IL7R/MFNG/TNFSF4/HSPD1/TYROBP/ZBTB1/JAK3/SKAP2/RBPJ/TPD52/DLL1/ATP11C/HDAC4/INHBA/TNFAIP3/AHR/GON4L/BTK/EXO1/ERCC1/CD40LG/LAT2/PTPRC/TP53BP1/MNDA/KLF6/NFAM1/ZFP36L2/SAMSN1/FNIP1/HMGB3/FOX…	BP
circulatory system process	264/7182	532/17910	4.00192e-06	6.14235e-05	4.59246e-05	264	TEK/CLIC2/GUCY1B1/GUCY1A1/HEG1/CD34/RAMP3/ELN/PTPRM/SLIT2/SCN4B/ITPR1/VEGFC/HTR2A/SERPING1/NPR2/RAMP2/EDNRA/KCNE4/MEOX2/KCNJ8/KCND1/TRPC1/AR/ABCC9/WWTR1/FXYD6/PRKG1/FLI1/CELF2/SGCD/ACVRL1/PDE2A/ATP1B2/ANGPT1/PDE5A/ANK2/CYB5R3/CXCL12/BMPR2/NCALD/CCN2/GJA5/EPAS1/GNAI2/SCN2B/GNAO1/NISCH/NPR1/FYN/F2R/MEF2A/SCN1B/VEGFB/ACTA2/TGFB1/NR2F2/KCNIP1/EDNRB/GJC1/PDE3A/GAS6/FXYD1/ITGA1/CACNA1H/CACNA2D3/COL1A2/…	BP
energy derivation by oxidation of organic compounds	142/7182	264/17910	4.13717e-06	6.34092e-05	4.74092e-05	142	IL6ST/C1QTNF2/NFATC4/LEPR/ADGRF5/PCDH12/ISCU/CAVIN3/PINK1/COX4I2/GFPT2/IGF1/SORBS1/PID1/PYGM/MECP2/COX5A/PPP1R3F/CYCS/KL/PIK3CA/CDK1/GYG1/COX6A1/PRKAG2/PHKG1/CCNB1/UQCRH/SLC25A12/FLCN/COX5B/CBFA2T3/INPP5K/UQCRC1/PPP1R1A/COA6/PPP1R3C/IDH1/MTFR1/PPP1R3G/NDUFB3/CYC1/STK40/NR4A3/TBRG4/ADRB3/STBD1/NDUFS3/MTFR2/COX8A/IRS1/UQCRQ/UQCC3/SHMT2/SNCA/COX6B1/FH/SDHA/PHLDA2/NOP53/PDHA1/ENPP1/INSR/GAA/CAT/LYRM7…	BP
plasma membrane organization	58/7182	91/17910	4.29113e-06	6.56755e-05	4.91037e-05	58	PLSCR4/SYT11/EHD2/AR/FAT4/ANK2/MYH10/GSN/DYSF/COL5A1/STX2/P2RX7/A4GALT/EPB41L3/ABCD2/SYPL2/MYH9/ANO6/PLEKHM2/CAVIN2/SNX33/PTEN/SH3GLB1/CLU/CXCR4/BIN2/CAV1/MTSS2/SNX9/PSAP/MTSS1/FA2H/TLCD1/BAIAP2L2/PTPRC/TGFB2/FLOT1/AKT2/MYOF/BAIAP2L1/MYRF/PRKCD/FNBP1L/SOD1/WHAMM/ANO9/CAV2/SPTBN1/DNM2/SERP1/MICALL1/XKR8/NOX1/PACSIN2/UGCG/AKT1/BIN1/TLCD2	BP
organic acid metabolic process	516/7182	1109/17910	4.30994e-06	6.587e-05	4.92491e-05	516	CYP2U1/QKI/HACD4/GGT5/DCN/CSGALNACT2/HTR2A/C1QTNF2/LUM/CYP1B1/CRTAP/OMD/PTGIS/ARSB/PRELP/BHMT2/CYGB/ITIH5/HGF/STAT5B/OGN/CYP7B1/CHST7/ANGPT1/CH25H/BGN/CYB5R3/CHSY3/VCAN/CDO1/DSEL/GHR/DSE/ASPA/NDST1/ALDH1A3/FGF2/TGFB1/ST3GAL3/CHST12/AASS/MTR/FOLR2/PPM1K/CHST14/ITIH3/P2RX7/PRXL2C/GFPT2/CHST1/PLA2G4C/IGF1/TPST1/ARNT/ZBTB20/ATP2B4/PAM/FMO1/ABCD2/NOX4/C3/DEGS1/MYO5A/MECP2/ACACB/CSPG4/OAZ2/AVPR1A/CREM/…	BP
tumor necrosis factor production	90/7182	155/17910	4.38635e-06	6.69431e-05	5.00514e-05	90	CD34/SYT11/NFATC4/ANGPT1/NOD1/C1QTNF4/PIK3R1/GAS6/THBS1/LRRK2/ISL1/IGF1/ZBTB20/AKAP12/SPON2/LY96/GPNMB/AXL/FOXP1/CD14/TLR1/CCL19/TLR4/CX3CR1/CLU/LILRA4/CD36/VSIR/TREM2/TSPO/CCR2/AZI2/SIRPA/TYROBP/ARHGEF2/TWIST1/LILRB1/ZFP36/MIR125B1/SPN/ARRB2/NLRC3/CYBB/TNFAIP3/TMEM106A/LILRA5/SLAMF1/DDT/ZC3H12A/PTPRC/FOXP3/APP/TIRAP/LPL/HAVCR2/CLEC4A/TLR2/MAPKAPK2/POMC/SASH3/ADIPOQ/RIPK1/CD2/MIF/CACTIN/GPR18/FCE…	BP
regulation of body fluid levels	249/7182	499/17910	4.43684e-06	6.7618e-05	5.0556e-05	249	A2M/HEG1/CD34/ENTPD1/ITPR1/SELP/SERPING1/ZFPM2/TBXA2R/FBLN1/EHD2/PRKG1/FLI1/STAT5B/PEAR1/F8/ADCY4/VWF/APLNR/PHF21A/CDO1/PDGFRA/ADCY9/GJA5/GNAI2/TLN1/DOCK11/PRKCH/MMRN1/NPR1/FYN/F2R/ADCY5/EDNRB/SH2B3/PIK3R1/PRCP/GAS6/THBD/GNA12/PLAT/THBS1/PRKCB/P2RX7/ILK/COL1A2/COL3A1/P2RY12/F2RL2/PAM/ITGB3/PRKACB/FGF10/FLNA/VCL/FAP/RBSN/NCOA1/MYL9/MYH9/PROS1/ANO6/C1QTNF1/NME1/PRKAR2B/JHY/KDF1/PIK3R5/PIK3R6/TRPC6/…	BP
positive regulation of plasma membrane bounded cell projection assembly	60/7182	95/17910	4.54927e-06	6.92336e-05	5.17639e-05	60	TGFB3/RHOQ/PALM/NRP1/DPYSL3/DZIP1/DOCK11/P2RX7/SEPTIN7/WASF2/P2RY12/CEP120/KIT/CCL19/TGFBR1/SRF/CROCC/CCDC88A/ARAP1/APC/PLEK2/BBS4/ANLN/EPS8L1/CCR7/RIPOR2/FUZ/AUTS2/HDAC4/CDC42EP1/EPS8L2/F2RL1/NDEL1/TENM2/TAPT1/DEF8/BRK1/ARHGAP35/KCTD17/RALA/AKIRIN1/CDC42EP5/PLEKHM1/TWF2/FNBP1L/ATP7A/CCL21/MARK4/DNM2/ATMIN/ENTR1/CARMIL2/RAC1/FSCN1/SEPTIN9/CYFIP1/HTT/MIEN1/CDC42EP4/ZMYND8	BP
regulation of T cell proliferation	87/7182	149/17910	4.61209e-06	7.00908e-05	5.24048e-05	87	LRRC32/IL6ST/STAT5B/PDE5A/TGFBR2/CD81/TGFB1/TWSG1/TNFSF8/CD1D/IGF1/GPNMB/CD4/VCAM1/TMEM131L/CD28/CCL19/AIF1/PRNP/PRKAR1A/CD209/NCKAP1L/SOS1/VSIR/CCR2/TNFSF4/VSIG4/LMO1/LILRB1/SPN/TNFSF18/LILRB2/PDCD1LG2/CD276/TRAF6/CD6/CD40LG/PTPRC/DLG5/TNFRSF1B/MAPK8IP1/RASAL3/PNP/FOXP3/TFRC/CD3E/ZAP70/HAVCR2/HHLA2/CD46/HES1/NCK1/SH3RF1/TNFSF13B/SASH3/CASP3/MARCHF7/NCK2/HLA-DPB1/LGALS3/IL6/FOXJ1/CEBPB/HLA-DPA1/H…	BP
regulation of I-kappaB kinase/NF-kappaB signaling	123/7182	224/17910	4.69414e-06	7.12374e-05	5.32621e-05	123	MAP3K3/PRKD1/LPAR1/LURAP1/RORA/ANGPT1/MID2/NOD1/FYN/F2R/PRKN/ABL1/WLS/PRKCB/PINK1/ROR1/LGALS1/FLNA/TERF2IP/ZDHHC17/CARD8/PER1/CD4/CCL19/MAPKBP1/TLR4/MAP3K14/HTR2B/GJA1/CFLAR/TRIM22/CX3CR1/TRIM8/CD36/ZMYND11/AKAP13/PPM1A/S100B/TAB2/TRIM38/LITAF/SIRPA/PRKCE/TNFRSF1A/CCR7/ASH1L/APOL3/SIRT1/NDFIP2/NLRC3/TNFAIP3/JMJD8/IRAK4/TRAF6/F2RL1/TMEM106A/OTUD7B/TLR6/TGM2/ZC3H12A/MIER1/TRAF5/ECT2/MAP3K7/HDAC1/BT…	BP
cellular chemical homeostasis	323/7182	666/17910	4.70485e-06	7.12997e-05	5.33087e-05	323	CYBRD1/S1PR1/CLIC2/SYNPO/RAMP3/PKD2/ITPR1/HTR2A/DLG4/EDNRA/SERPINF1/S1PR3/LPAR1/CYSLTR1/TRPC1/CLIC4/THY1/ATP1B2/KLF7/ANK2/BCL2/C7/APLNR/CXCL12/PDGFRA/SLC39A13/LRP1/SLC22A17/FYN/F2R/ADCY5/PKD1/FGF2/KCTD7/TGFB1/EDNRB/PIK3R1/ABL1/GAS6/PTH1R/CCL14/LRRK2/PRKCB/ATP6V1G2/P2RX7/FBXL5/GRIK5/RASA3/ZBTB20/SLC8A1/ATP2B4/LGALS1/CACNB2/KCNMA1/CACNA1C/DMD/NOX4/CDH23/ITGAV/MYO5A/KCNB1/SYPL2/JPH2/PLN/AVPR1A/NCS1/…	BP
positive regulation of leukocyte differentiation	84/7182	143/17910	4.81647e-06	7.28887e-05	5.44968e-05	84	GLI3/GLI2/STAT5B/ROR2/IL34/TGFBR2/HLX/TGFB1/SOCS5/GAS6/CSF1/ZMIZ1/KLF10/ZBTB16/ITPKB/AXL/PIK3R6/ZFP36L1/FES/CYLD/CD4/ZBTB46/CCL19/NLRP3/BCL6/TESPA1/IL4R/NCKAP1L/MMP14/HCLS1/EVI2B/IL7R/VSIR/CREB1/TREM2/TNFSF4/TYROBP/CD83/LEF1/EGR3/CD86/ZBTB1/JUN/ATP11C/CCR1/LILRB2/GATA3/TRAF6/BTK/MYB/PTPRC/PNP/FOXP3/ZAP70/CD46/SASH3/TNFSF11/RIPK1/PRKCZ/RUNX1/INPP5D/TOX/TESC/VNN1/PRKCA/NFKBID/FOS/LILRB4/ZBTB7B/RASG…	BP
fat cell differentiation	122/7182	222/17910	4.85709e-06	7.34005e-05	5.48794e-05	122	HTR2A/RUNX1T1/ZFPM2/WWTR1/CREBL2/LRRC8C/RORA/CLIP3/FRZB/FTO/SH3PXD2B/TGFB1I1/LMO3/ADGRF5/GDF6/TGFB1/RARRES2/DYSF/SFRP1/SFRP2/BBS9/JDP2/EBF2/FGF10/CCDC3/ZBTB16/ARID5B/ADRB2/ZFP36L1/STEAP4/RGS2/ARL6/MEDAG/FNDC5/CCDC71L/SNAI2/CCN4/GATA2/GDF10/RNASEL/FOXO1/TRIO/ZNF516/ID4/SLC2A4/CEBPD/GRK5/CREB1/ERO1A/OSBPL8/BBS4/SIRT2/NR4A3/CMKLR1/KLF5/ZFP36/LRG1/SIRT1/GATA3/ENPP1/C1QTNF3/PLAC8/OSBPL11/ARNTL/PSMB8/Z…	BP
morphogenesis of a polarized epithelium	82/7182	139/17910	4.93679e-06	7.45007e-05	5.5702e-05	82	GPC6/PRICKLE1/DACT1/FZD4/DAB2/RSPO3/MSN/ROR2/FZD1/ANKRD6/FOXF1/MAGI2/PRICKLE2/SFRP1/MYO9A/ABL1/SFRP2/ROR1/FZD7/PAFAH1B1/DAAM1/BRSK1/FOXF2/SAPCD2/TIAM1/TCF15/DLG3/FZD2/PSME2/CTHRC1/PSMA5/ARRB2/FUZ/PSMD14/CPLANE1/PSMB3/EXOC5/DVL2/PSMB8/DLG5/SMURF2/RYK/SLC9A3R1/DVL3/PSMA4/AP2A1/AP2A2/PSMA3/SYNE4/PSMA2/LAMA5/SEC24B/MED12/AP2M1/PSMB2/PSMA1/CAMSAP3/PSMB9/DVL1/GRHL3/SH3BP1/PSMD13/PSMB7/PSMD1/PSMB10/PSME…	BP
myeloid leukocyte differentiation	112/7182	201/17910	4.95595e-06	7.46853e-05	5.58401e-05	112	FBN1/MEF2C/FAM20C/GAB3/MAFB/ROR2/NOTCH2/IL34/CSF1R/TGFBR2/LRRC17/GPR183/CD81/TGFB1/SH3PXD2A/SFRP1/PDE1B/MITF/PIK3R1/NRROS/TSPAN2/CSF1/RASSF2/KLF10/L3MBTL3/OSTM1/MYH9/NME1/TFE3/ZFP36L1/TAL1/FES/FOXP1/KIT/CD4/PAFAH1B1/ZBTB46/CCL19/CCN4/GATA2/TLR4/PIK3CD/HCLS1/EVI2B/CBFA2T3/CREB1/TREM2/IFI16/TYROBP/ESRRA/LEF1/CCR7/LILRB1/MIR125B1/JUN/FSTL3/LRRK1/RBPJ/SPI1/SIRT1/C1QC/CARTPT/BATF3/CCR1/INHBA/GATA3/JUN…	BP
cellular response to abiotic stimulus	163/7182	310/17910	5.00491e-06	7.52131e-05	5.62346e-05	163	MAPK10/PKD2/MFAP4/ENG/NFATC4/PALM/LRRC8C/PDE2A/TGFB1/DYSF/SFRP1/PIK3R1/SFRP2/CRYAB/NSMCE3/CRY2/TMEM109/POLK/PTN/RHOB/TLR7/NOX4/CREBBP/AVPR1A/ZFP36L1/MYLK/RCSD1/HYAL2/AQP1/SIPA1/PBK/TLR5/RAB11FIP5/SNAI2/ATP1A2/MAP3K20/BMP6/TLR4/MAP3K14/COL1A1/PTEN/ATM/GOT1/GJA1/XPC/CDC25A/AKR1B1/SLC2A4/HVCN1/NEDD4/PCNA/TSPO/IFI16/EFHD1/TNFSF14/ARHGEF2/TNFRSF1A/AURKB/MAPK13/RAD51AP1/HABP4/MCOLN1/ZBTB1/SOX9/RIPOR2/B…	BP
cellular response to environmental stimulus	163/7182	310/17910	5.00491e-06	7.52131e-05	5.62346e-05	163	MAPK10/PKD2/MFAP4/ENG/NFATC4/PALM/LRRC8C/PDE2A/TGFB1/DYSF/SFRP1/PIK3R1/SFRP2/CRYAB/NSMCE3/CRY2/TMEM109/POLK/PTN/RHOB/TLR7/NOX4/CREBBP/AVPR1A/ZFP36L1/MYLK/RCSD1/HYAL2/AQP1/SIPA1/PBK/TLR5/RAB11FIP5/SNAI2/ATP1A2/MAP3K20/BMP6/TLR4/MAP3K14/COL1A1/PTEN/ATM/GOT1/GJA1/XPC/CDC25A/AKR1B1/SLC2A4/HVCN1/NEDD4/PCNA/TSPO/IFI16/EFHD1/TNFSF14/ARHGEF2/TNFRSF1A/AURKB/MAPK13/RAD51AP1/HABP4/MCOLN1/ZBTB1/SOX9/RIPOR2/B…	BP
cellular response to nutrient levels	121/7182	220/17910	5.02481e-06	7.53024e-05	5.63014e-05	121	PRKD1/KANK2/SESN3/BCL2/BMPR2/FYN/RIPOR1/SFRP1/ZFYVE1/GAS6/WNT2B/FOLR2/FAM107A/LRRK2/P2RX7/RRAGB/PTN/SSH1/P2RY12/KLF10/NCOA1/KCNB1/MAP1LC3C/AMIGO1/FES/TNRC6A/SNAI2/SRF/TNC/AIFM1/BMT2/COL1A1/RRAGA/FOXO1/RNF152/SH3GLB1/MAP1LC3B/IFI16/ATG14/ULK1/PDK4/PRKAA2/MIR125B1/POSTN/JUN/MAP1LC3A/HSPA5/DSC2/RYR3/SIRT1/CARTPT/RRAGC/CYBB/FADS1/SZT2/PDK2/BRIP1/SLC38A2/ZC3H12A/PIM1/USF2/PENK/RRAGD/FOXA3/ATG7/TAF1/FN…	BP
cellular response to decreased oxygen levels	121/7182	220/17910	5.02481e-06	7.53024e-05	5.63014e-05	121	CD34/PTGIS/RORA/BCL2/EPAS1/SFRP1/PINK1/COX4I2/PTN/ARNT/SLC8A1/CITED2/CREBBP/KCNMB1/TRPC6/ZFP36L1/AQP1/KCNK2/VASN/AIFM1/PTEN/CCNB1/CCNA2/CFLAR/SLC2A4/ERO1A/S100B/KCNK3/PRKCE/SIRT2/TWIST1/PSME2/PSMA5/RGCC/RBPJ/DDAH1/PSMD14/SIRT1/CPEB2/CYBB/NOP53/EGR1/FOXO3/PSMB3/CHCHD2/BRIP1/PSMB8/BNIP3L/ENDOG/SUV39H1/STC1/CACNB3/PMAIP1/EEF2K/HP1BP3/HIF3A/EGLN1/PICK1/PSMA4/EIF4EBP1/MDM4/CBL/CPEB4/PSMA3/PSMA2/E2F1/U…	BP
alpha-beta T cell activation	79/7182	133/17910	5.08659e-06	7.61225e-05	5.69146e-05	79	GLI3/RORA/BCL2/TGFBR2/GPR183/CD81/HLX/TWSG1/LOXL3/SOCS5/ABL1/ZBTB16/ITPKB/SATB1/FOXP1/CD28/CCL19/NLRP3/BCL6/IL4R/NCKAP1L/VSIR/CCR2/TNFSF4/CD83/LEF1/LILRB1/CD86/STAT3/SPN/JAK3/EOMES/SLAMF6/DOCK2/GATA3/LY9/ZC3H12A/MYB/PTPRC/MAPK8IP1/RASAL3/SMAD7/PNP/FOXP3/CD3E/ZAP70/CLEC4A/SH3RF1/STAT6/SASH3/NKX2-3/PRKCZ/STOML2/CD300A/GPR18/RUNX1/PTGER4/IL6/RELB/IL18R1/ATP7A/NFKBID/RORC/TMEM98/HLA-E/EBI3/BCL11B/ZBT…	BP
phospholipid metabolic process	205/7182	402/17910	5.10112e-06	7.61566e-05	5.69401e-05	205	TEK/PDGFRB/HTR2A/PRKD1/TTC7B/SERINC1/CSF1R/PIP4K2A/PDGFRA/SMPD1/CD81/ADGRF5/FGF2/TGFB1/PIK3IP1/SOCS5/PIP5K1C/PIK3R1/INPP4A/PIP4P2/PLA2G4C/P2RY12/TNFAIP8L3/MECP2/OSBPL5/INPP5B/PIK3R5/PIK3R6/AGPAT4/FAM126A/INPP5A/KIT/PIK3CA/PAFAH1B1/CDS2/CCL19/WDR81/FLT1/PLEKHA4/CDS1/HTR2B/PTEN/ATM/PIK3CD/SYNJ1/BMX/INPP5F/LCAT/PTPN13/MTMR9/ENPP2/INPP5K/PITPNM2/PLEKHA3/CDIPT/SOCS3/PLCG1/PDGFB/SLC27A1/DBI/PLEKHA2/SH3…	BP
regulation of ossification	111/7182	199/17910	5.11005e-06	7.61566e-05	5.69401e-05	111	S1PR1/MGP/IL6ST/GLI1/PRKD1/DDR2/OMD/IGFBP5/TGFB3/GREM1/HGF/MEF2C/GLI3/FAM20C/TMEM119/BCL2/PBX1/SKI/TWIST2/BMPR2/TGFB1/TWSG1/SFRP1/SFRP2/SUFU/P2RX7/CSF1/ILK/PTN/IGF1/HDAC7/RASSF2/SLC8A1/PDLIM7/ZHX3/ZBTB16/CCN1/ANO6/GPM6B/HAND2/PRKACA/ADRB2/KL/TACR1/BMPR1A/SNAI2/CCN4/BMP6/TNN/GDF10/CHSY1/GJA1/ID4/SIX2/OSR1/CEBPD/SMAD5/ACVR2A/NOG/PTCH1/ESRRA/TWIST1/CHRD/ID1/ANKH/TAC1/SOX9/CTHRC1/RBPJ/SMAD1/TFAP2A/HD…	BP
regulation of microtubule-based process	111/7182	199/17910	5.11005e-06	7.61566e-05	5.69401e-05	111	PHLDB1/FEZ1/CLIP3/NAV3/EPHA3/TTBK2/HDGFL3/MAP1B/BMERB1/PKD1/PHLDB2/ANKRD53/ABL1/FAM107A/DIXDC1/MACF1/MAP9/KAT2B/GNAI1/MECP2/CEP120/FES/CYLD/POC1A/PAFAH1B1/NIN/TOGARAM1/RASSF7/STMN2/CHMP4C/SKA3/PLK4/MAPT/CLASP1/MAP2/KLHL42/CDKN1B/APC/BICD2/DCTN1/SLAIN2/BBS4/PLK1/ARHGEF2/NUMA1/DYNC1H1/PRKAA2/KIF11/DYRK1A/CLIP1/TAOK1/SNCA/SPAG5/NEK2/KIF18A/TPX2/CLASP2/CAMSAP2/SENP6/AURKA/STIL/SKA1/ARL2/FKBP4/BICD1/M…	BP
epithelial cell apoptotic process	68/7182	111/17910	5.16378e-06	7.68513e-05	5.74594e-05	68	TEK/RAMP2/ECSCR/ANGPT1/BMPR2/TGFBR2/GSN/SFRP4/ABL1/GAS6/CD248/THBS1/CCL2/KDR/COL18A1/ANO6/ZFP36L1/GATA2/ITGA4/KRT18/KRT8/CFLAR/PLCG1/RYR2/COL4A3/NUPR1/ZFP36/ARRB2/RGCC/SEMA5A/TNFAIP3/GATA3/FOXO3/MAPK7/EXOC5/CD40LG/E2F2/CAST/E2F1/NDNF/PDPK1/SCG2/SERPINE1/BID/HIPK1/MIR132/PIK3CG/MIR126/PDX1/IL6/DNMT3A/PIAS4/AKR1C3/BOK/PAK4/BCL2L1/JAG2/HMOX1/CD40/ANGPTL4/SORT1/STK4/GPER1/BAD/MDK/TNIP2/WFS1/MIR590	BP
positive regulation of I-kappaB kinase/NF-kappaB signaling	98/7182	172/17910	5.27505e-06	7.83992e-05	5.86168e-05	98	MAP3K3/PRKD1/LPAR1/LURAP1/MID2/NOD1/FYN/F2R/PRKN/ABL1/WLS/PRKCB/PINK1/ROR1/LGALS1/FLNA/TERF2IP/ZDHHC17/CD4/CCL19/TLR4/MAP3K14/HTR2B/GJA1/CFLAR/TRIM22/CX3CR1/TRIM8/CD36/AKAP13/PPM1A/S100B/TAB2/TRIM38/LITAF/PRKCE/TNFRSF1A/CCR7/APOL3/NDFIP2/JMJD8/IRAK4/TRAF6/F2RL1/TMEM106A/TLR6/TGM2/MIER1/TRAF5/ECT2/MAP3K7/INAVA/TIRAP/ZDHHC13/TRIM32/REL/TRIM62/CASP10/RELA/TNFSF11/ADIPOQ/MUL1/RIPK1/TSPAN6/IKBKB/IFIT5…	BP
histone modification	213/7182	420/17910	5.45685e-06	8.09895e-05	6.05535e-05	213	MAP3K12/PRKD1/APBB1/EID1/PPM1F/SKI/USP51/PRMT2/PRDM6/PHC1/EZH1/TGFB1/NAP1L2/PHF1/HDAC5/LRRK2/PRKCB/PINK1/SAP30L/PRDM5/JDP2/PRDM2/ISL1/HDAC7/KAT2B/NCOA1/MECP2/SATB1/CREBBP/EPC2/PER1/NACC2/MYOCD/LDB1/CDK1/SNAI2/ING4/SETMAR/GATA2/BCL6/CCNB1/ATM/SETD7/PHF2/PKN1/CCNA2/ELK4/FLCN/VRK1/MORF4L1/KMT2A/EPC1/ARID4A/ARRB1/JADE2/ZNF304/AURKB/SIRT2/TWIST1/LEF1/SIRT7/EZH2/ASH1L/C6orf89/PRKAA2/SMYD1/AUTS2/ATRX/SN…	BP
regulation of cell projection assembly	96/7182	168/17910	5.53335e-06	8.20122e-05	6.13181e-05	96	SLIT2/TGFB3/RHOQ/PALM/NRP1/DPYSL3/DZIP1/DOCK11/EVL/MAP4/P2RX7/SEPTIN7/WASF2/P2RY12/FER/RDX/SRGAP2C/CEP120/PPP1R16B/CYLD/KIT/CCL19/GAP43/TGFBR1/SRF/CROCC/CCDC88A/CORO1C/EVI5L/PODXL/ARAP1/APC/PLEK2/BBS4/ANLN/EPS8L1/CCR7/CAV1/RAB17/KLF5/RIPOR2/FUZ/AUTS2/HDAC4/CDC42EP1/EPS8L2/F2RL1/IFT140/NDEL1/TENM2/TAPT1/DEF8/BRK1/ATP8B1/KANK1/ARHGAP35/KCTD17/ADAMTS16/ODF2L/EPHA2/RALA/AKIRIN1/CDC42EP5/TBC1D30/PLEKH…	BP
peptidyl-serine phosphorylation	126/7182	231/17910	5.65715e-06	8.3732e-05	6.2604e-05	126	RAMP3/MAP3K12/PRKD1/PLCL1/HGF/CREBL2/ANGPT1/PPM1F/BCL2/TTBK2/TGFBR2/DCLK2/PKD1/TGFB1/SFRP2/GAS6/LRRK2/PINK1/HIPK3/ILK/RASSF2/ATP2B4/DMD/TERF2IP/PRKACA/TRIM6/PIK3CA/MAPKAP1/CDK1/TGFBR1/CCNB1/ATM/PLCL2/INPP5F/TXN/HCLS1/MKNK1/INPP5K/VRK1/PDE4D/MARK1/PDGFB/ARRB1/ROCK1/PLK1/PRKCE/AURKB/MAPK13/ULK1/CAV1/WNK1/PRKAA2/ARRB2/DYRK1A/BDKRB2/TTK/TNKS1BP1/SNCA/MORC3/CAMK1/DCLK1/RAPGEF3/CLSPN/AURKA/MAPK7/CSNK1A…	BP
cofactor metabolic process	268/7182	543/17910	5.78174e-06	8.53969e-05	6.38488e-05	268	GGT5/HTR2A/PTGIS/BHMT2/GSTM5/CYB5R3/FYN/ISCU/AASS/MTR/FOLR2/PINK1/P2RX7/PRXL2C/PXDN/IGF1/ARNT/ZBTB20/FMO1/H6PD/ACACB/RNLS/TCN2/NNMT/BST1/MOCS1/BLVRA/ADHFE1/PRKAG2/NOS3/TPO/PRSS3/GSTO2/PDPR/UROD/GOT1/GSTM2/AKR1B1/SLC25A12/NFE2L1/CBR3/OXSM/ELOVL5/SLC23A2/CBFA2T3/SPR/ELOVL6/CHAC2/TALDO1/SLC25A39/CRYZL1/BDH2/TSPO/ELOVL4/HACD1/ATP5IF1/DBI/DCXR/GGCT/IDH1/HMBS/GPX3/NAPRT/ACOT2/PSAT1/CNDP2/PDSS1/SRRD/STA…	BP
kidney development	147/7182	276/17910	5.78546e-06	8.53969e-05	6.38488e-05	147	TEK/TNS2/DCN/CD34/PECAM1/PKD2/PDGFRB/SLIT2/FBN1/TCF21/HEYL/DCHS1/SERPINF1/KCNJ8/GREM1/GLIS2/MEF2C/GLI3/WWTR1/FAT4/GLI2/NID1/NRP1/KANK2/ANGPT1/BCL2/MAGI2/PBX1/PDGFRA/LAMB2/NOTCH3/SMO/PKD1/ADAMTS1/ACTA2/FGF2/TGFB1/FGF1/SPRY1/SFRP1/WNT2B/LRRK2/FGFR1/ILK/BMPER/FGF10/EPCAM/SULF1/ZBTB16/RARB/ARID5B/PDGFD/HYAL2/GPR4/TGFBR1/BMP6/LZTS2/PGF/CFLAR/AKR1B1/COL4A4/SIX2/OSR1/AGTR1/MMP17/FLCN/PODXL/SMAD5/PDGFB/N…	BP
regulation of cytosolic calcium ion concentration	153/7182	289/17910	5.87563e-06	8.66094e-05	6.47553e-05	153	S1PR1/CLIC2/SYNPO/RAMP3/PKD2/ITPR1/HTR2A/DLG4/EDNRA/S1PR3/LPAR1/CYSLTR1/TRPC1/THY1/ANK2/BCL2/APLNR/PDGFRA/LRP1/FYN/F2R/ADCY5/PKD1/FGF2/TGFB1/EDNRB/ABL1/PTH1R/P2RX7/RASA3/SLC8A1/ATP2B4/CACNB2/CACNA1C/DMD/CDH23/ITGAV/MYO5A/JPH2/PLN/AVPR1A/NCS1/C1QTNF1/TRPC6/ADCYAP1/PRKACA/AKAP6/RIC3/C3AR1/CD4/TACR1/CCL19/ATP1A2/PRNP/CACNA2D1/ADCYAP1R1/GATA2/ABL2/F2RL3/HTR2B/BDKRB1/SWAP70/NPTN/GOT1/GJA1/GSTM2/AGTR1/…	BP
cytoskeleton-dependent cytokinesis	53/7182	82/17910	6.00383e-06	8.83784e-05	6.60779e-05	53	MYH10/ANKRD53/SNX18/KLHDC8B/RHOB/MAP9/SNX33/LZTS2/CHMP4C/CENPA/APC/BBS4/PLK1/CEP55/AURKB/ANLN/SNX9/NUSAP1/ARL3/SPIRE1/KIF4A/KIF23/ESPL1/RASA1/SPIRE2/RACGAP1/KIF20B/ECT2/SEPTIN6/SON/CHMP7/ZFYVE26/CKAP2/CHMP3/BRCA2/CHMP1B/KIF20A/CHMP6/INCENP/RAB35/CIT/SPTBN1/STMN1/RHOA/JTB/WASHC5/CHMP5/UNC119/DCTN3/IST1/CHMP2B/CFL1/RHOC	BP
endocardial cushion development	33/7182	45/17910	6.21832e-06	9.14111e-05	6.83454e-05	33	HEYL/DCHS1/ENG/ACVRL1/FOXF1/ROBO1/BMPR2/TGFBR2/ISL1/TMEM100/BMPR1A/SNAI2/TGFBR1/NOS3/HEY2/RBM24/NEDD4/NOG/TWIST1/CRELD1/SOX9/TBX2/RBPJ/SNAI1/SMAD4/ERBB3/TGFB2/ACVR1/MDM4/HEY1/NOTCH1/MSX2/JAG1	BP
extracellular matrix assembly	23/7182	28/17910	6.42848e-06	9.43719e-05	7.05591e-05	23	FBLN5/EFEMP2/EMILIN1/MFAP4/ANTXR1/TNXB/TGFB1/GAS6/COL1A2/GPM6B/MYH11/LOX/SOX9/RGCC/HAS1/THSD4/SMPD3/HAS2/AGT/ATP7A/NOTCH1/HAS3/QSOX1	BP
divalent inorganic cation homeostasis	209/7182	412/17910	6.50513e-06	9.53673e-05	7.13034e-05	209	S1PR1/CLIC2/SYNPO/RAMP3/PKD2/ITPR1/HTR2A/DLG4/EDNRA/S1PR3/LPAR1/CYSLTR1/TRPC1/SGCD/THY1/ANK2/BCL2/APLNR/CXCL12/PDGFRA/SLC39A13/LRP1/FYN/F2R/ADCY5/PKD1/FGF2/TGFB1/EDNRB/PRKN/ABL1/PTH1R/CCL14/PRKCB/P2RX7/RASA3/SLC8A1/ATP2B4/CACNB2/CACNA1C/DMD/CDH23/ITGAV/MYO5A/SYPL2/JPH2/PLN/AVPR1A/NCS1/C1QTNF1/DMPK/TRPC6/ADCYAP1/PRKACA/AKAP6/KL/RIC3/C3AR1/CD4/TACR1/CCL19/ATP1A2/PRNP/CACNA2D1/ADCYAP1R1/GATA2/SV2A/A…	BP
response to molecule of bacterial origin	162/7182	309/17910	6.65416e-06	9.74198e-05	7.2838e-05	162	PLSCR4/DCN/PTGIR/SELP/LOXL1/TBXA2R/KCNJ8/SSC5D/MEF2C/PTGFR/VIM/SPARC/F2R/TGFB1/C4B/EDNRB/ABL1/THBD/LDOC1/PTGER1/HDAC5/ABCA1/P2RX7/FCGR2B/CCL2/SASH1/FMO1/FGF10/AKAP12/SPON2/LY86/LY96/FER/AXL/CARD8/PDE4B/TRIM6/FOXP1/CD14/VCAM1/TLR1/GNG12/NLRP3/NOS3/BMP6/TLR4/WDR35/BDKRB1/GJA1/SRR/CX3CR1/CD36/CNR1/TREM2/TSPO/MRC1/PDE4D/TAB2/SELE/LITAF/TNFSF4/SIRPA/PRKCE/SIRT2/CCR7/LILRB1/NFKBIA/ADH5/C5AR1/ZFP36/IL10…	BP
mitotic DNA integrity checkpoint	57/7182	90/17910	6.90571e-06	0.000100966	7.5489e-05	57	FOXN3/FBXO31/CDK1/TFDP2/SETMAR/CCNB1/ATM/RBL2/XPC/BRSK1/PCNA/CDKN1B/CDC25C/FOXO4/BTG2/RGCC/E2F8/SFN/TAOK1/TNKS1BP1/CNOT6L/CNOT4/NOP53/MUC1/CLSPN/MRNIP/CNOT11/AURKA/PLAGL1/ZNF385A/GTSE1/CDK5RAP3/TIPIN/TAOK2/MDM4/ATF2/E2F1/TICRR/GADD45A/CNOT8/DONSON/E2F7/PLK3/CHEK2/EP300/PML/GIGYF2/TFDP1/CNOT9/RINT1/TRIAP1/BLM/RFWD3/SYF2/CCND1/NAE1/CDKN1A	BP
response to hydrogen peroxide	84/7182	144/17910	7.03761e-06	0.000102755	7.68268e-05	84	PDGFRB/CYP1B1/HGF/BCL2/GNAO1/FYN/TXNIP/ABL1/ETS1/CRYAB/LRRK2/PINK1/RHOB/SLC8A1/AXL/DUSP1/TRPC6/PDGFD/AQP1/CDK1/AIFM1/COL1A1/FOXO1/TXN/PYCR1/PCNA/KCNA5/SIRPA/ZNF580/MAPK13/EZH2/NR4A3/JUN/MAP1LC3A/SIRT1/TNFAIP3/PSAP/FOXO3/PPIF/MAPK7/SMPD3/EEF2/MYB/ENDOG/ECT2/NQO1/KLF2/SETX/STK26/BAK1/STAT6/CASP3/RELA/RIPK1/CST3/LCN2/KDM6B/NET1/TRAP1/PRKCD/IL6/APTX/SOD1/SDC1/KPNA4/GPX1/BECN1/HMOX1/SIGMAR1/FABP1/GLRX…	BP
intrinsic apoptotic signaling pathway in response to DNA damage	58/7182	92/17910	7.08924e-06	0.000103369	7.72859e-05	58	HIC1/NFATC4/BCL2/CXCL12/PIK3R1/ABL1/SFRP2/PHLDA3/NACC2/ACKR3/SNAI2/MOAP1/CLU/CDIP1/IFI16/TAF9B/TNFRSF1A/NUPR1/SFN/SIRT1/SNAI1/MUC1/USP47/ZNF385A/FBH1/TNFRSF1B/TRIM32/DDIAS/BRCA1/EPHA2/MLH1/E2F1/MARCHF7/MIF/BID/BRCA2/HIPK1/BCL2L12/PIAS4/CDKN2D/CHEK2/EP300/PML/POLB/HTRA2/SKIL/IKBKE/BCL2L1/FNIP2/HMOX1/XPA/TRIAP1/ING2/TAF9/BAD/BCL2L11/SHISA5/CDKN1A	BP
regulation of microtubule polymerization or depolymerization	46/7182	69/17910	7.1693e-06	0.000104395	7.80532e-05	46	CLIP3/NAV3/TTBK2/HDGFL3/MAP1B/BMERB1/ANKRD53/ABL1/MECP2/FES/NIN/TOGARAM1/STMN2/SKA3/MAPT/CLASP1/MAP2/CDKN1B/APC/DCTN1/SLAIN2/ARHGEF2/NUMA1/DYRK1A/CLIP1/TAOK1/SNCA/CLASP2/CAMSAP2/SKA1/ARL2/FKBP4/EML2/CIB1/CKAP2/PRUNE1/PSRC1/TUBB4A/CAMSAP3/STMN1/RAC1/PAK1/CDK5RAP2/MID1/TBCD/HSPA1B	BP
muscle system process	225/7182	448/17910	7.18943e-06	0.000104547	7.81668e-05	225	CLIC2/IL6ST/GUCY1A1/SCN4B/HTR2A/EDNRA/KCNE4/TBXA2R/SSPN/IGFBP5/KCNJ8/MEF2C/PRKG1/SGCD/PDE5A/VIM/ANK2/CCN2/GJA5/SCN2B/GSN/TLN1/GNAO1/F2R/NMUR1/MEF2A/SCN1B/VEGFB/ACTA2/CALCRL/DYSF/EDNRB/GJC1/TMOD1/FXYD1/CRYAB/ITGA1/SGCA/CALD1/CACNA1H/UTRN/LMCD1/IGF1/SLC8A1/ATP2B4/LMOD1/CACNB2/SORBS1/PI16/KCNMA1/CACNA1C/DMD/FLNA/DAPK3/DOCK4/VCL/SCN7A/SULF1/MYL9/HSPB6/PLN/DMPK/SORBS3/RGS4/MYOT/ITGB5/PPP1R12B/MYOCD/PD…	BP
mammary gland development	81/7182	138/17910	7.35874e-06	0.000106746	7.98112e-05	81	IGFBP5/TGFB3/AR/GLI3/GLI2/STAT5B/FOXF1/ROBO1/CSF1R/CDO1/TGFBR2/SMO/NOTCH4/LBH/TGFB1/PGR/CSF1/PAM/FGF10/NTN1/NCOA1/NME1/RTN4/ELF3/GJA1/STAT5A/HOXA5/CREB1/SOCS2/PTCH1/IRF6/CAV1/SOX9/TBX2/GOT2/IQGAP3/GATA3/NCOR2/PPAT/HK2/USF2/OXTR/CCL11/BTRC/DDR1/WNT2/ARHGAP35/LATS1/AKT2/TNFRSF11A/EPHA2/MAPK1/STAT6/TNFSF11/KALRN/SCRIB/BRCA2/HOXB9/ATP7A/APRT/HIF1A/PML/CEBPB/XDH/UMPS/MSX2/ZBTB7B/GPX1/HOXA9/WNT5A/TDGF1…	BP
heart morphogenesis	134/7182	249/17910	7.36046e-06	0.000106746	7.98112e-05	134	TEK/S1PR1/HEG1/ELN/PKD2/SLIT2/HEYL/DCHS1/ENG/FLRT2/ZFPM2/DLC1/SLIT3/MEF2C/FAT4/ACVRL1/PARVA/NRP1/FZD1/NOTCH2/FOXF1/ROBO1/SOX17/BMPR2/TGFBR2/GJA5/SMARCD3/SMO/ADAMTS1/TGFB1/COL5A1/SPRY1/SFRP2/NRP2/SUFU/TGFBR3/ILK/ZMIZ1/ISL1/SOX18/CITED2/CCN1/TMEM100/CLDN5/CCM2L/MEGF8/RARB/HAND2/RTN4/OLFM1/PLXND1/MICAL2/BMPR1A/SNAI2/TGFBR1/TPM1/SRF/NOS3/CERT1/CPE/HTR2B/HEY2/GJA1/OVOL2/GRHL2/SOS1/NEDD4/NOG/BBS4/BBS5/…	BP
regulation of microtubule polymerization	34/7182	47/17910	7.41609e-06	0.000107409	8.03065e-05	34	CLIP3/NAV3/MAP1B/ANKRD53/ABL1/MECP2/FES/NIN/TOGARAM1/STMN2/MAPT/CLASP1/MAP2/CDKN1B/DCTN1/SLAIN2/NUMA1/DYRK1A/CLIP1/SNCA/CAMSAP2/ARL2/FKBP4/EML2/PRUNE1/PSRC1/TUBB4A/CAMSAP3/STMN1/RAC1/PAK1/CDK5RAP2/TBCD/HSPA1B	BP
intrinsic apoptotic signaling pathway	147/7182	277/17910	7.48438e-06	0.000108253	8.09373e-05	147	SEPTIN4/HIC1/ITPR1/CYP1B1/NFATC4/PPM1F/BCL2/CXCL12/PRKN/PIK3R1/ABL1/SFRP2/LRRK2/PINK1/PHLDA3/NACC2/ACKR3/CYLD/SNAI2/ARL6IP5/AIFM1/EDA2R/MOAP1/CLU/FLCN/GSKIP/CDIP1/MELK/ERO1A/IFI16/TAF9B/PERP/ARHGEF2/TNFRSF1A/CAV1/IL20RA/SGPP1/NDUFS3/NUPR1/BDKRB2/SFN/MLLT11/YBX3/SIRT1/SNAI1/DDX5/PDK2/MUC1/USP47/PPIF/MAPK7/BMF/ZNF385A/FBH1/TNFRSF1B/MCL1/HDAC1/MAPK8IP1/RNF183/BCAP31/SLC9A3R1/TRIB3/PMAIP1/CHAC1/E2F2/…	BP
cell-cell junction assembly	61/7182	98/17910	7.53683e-06	0.000108865	8.13954e-05	61	HEG1/RAMP2/CDH5/GJA4/CNTNAP1/ANK2/GJA5/GPBAR1/TLN1/PRKCH/GJC1/HDAC7/EPB41L3/VCL/NFASC/CLDN5/PRKACA/PKP3/SNAI2/SRF/GJA1/FLCN/GRHL2/APC/F11R/ROCK1/CRB3/PARD6G/MYO1C/UGT8/CAV1/TJP1/SNAI1/ARL2/DLG5/ECT2/PARD6B/AGT/POF1B/PATJ/MARVELD3/LSR/PKP2/MARVELD2/EPHA2/IKBKB/RUNX1/MPP7/GJB1/PRKCA/FZD5/CLDN3/RHOA/WDR1/OCLN/FSCN1/ROCK2/JUP/PARD3/TBCD/RHOC	BP
positive regulation of protein modification by small protein conjugation or removal	76/7182	128/17910	7.78446e-06	0.000112292	8.39573e-05	76	SEPTIN4/RNF180/PRICKLE1/ANGPT1/PRKN/RASD2/FAM107A/LRRK2/NSMCE3/PINK1/ARNT/ADRB2/ARRDC3/PTEN/CENPX/MYCBP2/CDC20/CHFR/ARRB1/PLK1/CAV1/UBE2C/GNL3/ARRB2/HSPA5/CENPS/HDAC4/ARRDC4/NDFIP2/FANCI/AVPR2/NOP53/TRAF6/PIN1/PDCD6/TSPYL5/ZC3H12A/PIAS1/INAVA/SMAD7/TRIB3/CDK5RAP3/RASSF5/BRCA1/PEF1/MARCHF7/CRY1/MUL1/CDK9/UBE2S/NDFIP1/PIAS3/RNF111/PIAS4/BCL10/MASTL/STUB1/TANK/AIMP2/GORASP1/HDAC3/UBE2D1/NMI/UBE2I/TO…	BP
localization within membrane	75/7182	126/17910	7.84804e-06	0.000113058	8.45301e-05	75	MAPK10/DLG4/GPC6/NRXN2/THY1/RILPL1/MAGI2/SHANK3/GSN/CEP112/CD81/GLRB/TGFB1/COLQ/HIP1/SYNGAP1/DLG2/PTN/GRIK5/SSH1/ITGB3/FLNA/RFTN1/SEC23A/RAP1A/ARL6/REEP2/SEC31A/ITGA4/RILPL2/EPS15/NPTN/CDH13/TBC1D20/MUSK/TYROBP/ATP1B1/DBN1/CLIP1/DOCK2/WDR19/IQSEC2/NDC1/STX7/ITGAL/PTPRC/SAR1A/SNAP47/ITGB2/PICK1/ITGB1BP1/SLC7A11/RALA/INSIG1/CD2/PRKCZ/PIGR/SCRIB/SEC24B/SNAP25/ZDHHC3/SSNA1/DVL1/APOE/CLSTN1/DNAJA3/REL…	BP
second-messenger-mediated signaling	185/7182	360/17910	7.90945e-06	0.000113791	8.50779e-05	185	CLIC2/GUCY1B1/GUCY1A1/RAMP3/PKD2/PTGIR/ITPR1/SELP/NPR2/RAMP2/LPAR1/ADGRD1/PTGFR/PRKG1/SGCD/PDE2A/PDE5A/ANK2/ADCY4/APLNR/NCALD/ADCY9/GNAI2/NPR1/NMUR1/ADCY5/GNAL/CALCRL/GUCY1A2/EDNRB/PDE3A/RASD2/PTH1R/THBS1/PTGER1/CRTC3/LRRK2/ABCA1/P2RX7/LMCD1/MCTP1/RCAN2/KDR/IGF1/P2RY12/SLC8A1/ATP2B4/CACNA1C/DMD/MYO5A/GNAI1/JPH2/TMEM100/PLN/KSR1/AVPR1A/ADCYAP1/PRKACA/GPR65/RGS2/AQP1/AKAP6/GNG2/ARRDC3/CD4/VCAM1/BST…	BP
negative regulation of cellular protein localization	68/7182	112/17910	8.01487e-06	0.000115154	8.60971e-05	68	MDFIC/DAB2/MAP1A/RHOQ/LEPROT/ANGPT1/PKIG/TTBK2/DCLK2/TGFB1/SUFU/LRRK2/APOD/PID1/GPM6B/RAB23/SNX33/PKIA/LZTS2/TXN/ANKRD13A/SAPCD2/PICALM/FLCN/CD36/ABHD17C/MAPT/INPP5K/TP53INP2/CDT1/RIPOR2/CHP1/PKDCC/UBE2G2/DCLK1/OTUD7B/ABHD17A/ACTN2/LYPLA1/LZTFL1/GOPC/FERMT1/ITGB1BP1/YOD1/SP100/RANGAP1/INSIG1/ADIPOQ/MACROH2A1/TRIM40/SIN3A/AP2M1/TMBIM1/LILRB4/TMEM98/NEDD4L/SVIP/BCL2L1/BAG3/ILRUN/MRAP2/OS9/INPP5E/GD…	BP
T-helper cell differentiation	40/7182	58/17910	8.02851e-06	0.000115196	8.61289e-05	40	RORA/GPR183/HLX/LOXL3/SOCS5/FOXP1/CCL19/NLRP3/BCL6/IL4R/TNFSF4/LEF1/CD86/STAT3/SPN/JAK3/SLAMF6/GATA3/LY9/ZC3H12A/MYB/SMAD7/FOXP3/STAT6/PRKCZ/PTGER4/IL6/RELB/IL18R1/ATP7A/NFKBID/RORC/TMEM98/ZBTB7B/IL12RB1/HMGB1/IRF4/RC3H1/RIPK2/ANXA1	BP
cellular response to reactive oxygen species	94/7182	165/17910	8.19108e-06	0.000117373	8.77563e-05	94	FBLN5/GUCY1B1/PKD2/CYP1B1/HGF/PDGFRA/ABL1/ETS1/MTR/LRRK2/PINK1/MMP2/RHOB/FER/AXL/TRPC6/PDGFD/AQP1/CDK1/TPM1/NOS3/AIFM1/FOXO1/CCNA2/TXN/CFLAR/CD36/MAPT/PYCR1/PCNA/CAMKK2/SIRPA/ZNF580/MAPK13/EZH2/NR4A3/JUN/MAP1LC3A/SIRT1/SZT2/PDK2/TNFAIP3/PSAP/BTK/FOXO3/PPIF/ERCC6L2/MAPK7/SMPD3/MYB/ENDOG/ECT2/MPV17/NQO1/KLF2/SETX/ROMO1/STK26/MAPK1/STAT6/PRDX5/RELA/RIPK1/CST3/LCN2/KDM6B/NET1/TRAP1/PRKCD/DHFR/IL6/ATP…	BP
leukocyte tethering or rolling	21/7182	25/17910	8.43955e-06	0.000120773	9.02984e-05	21	SELP/CXCL12/ITGB1/VCAM1/SELPLG/ITGA4/CX3CR1/CCR2/SELE/ROCK1/SELL/SPN/CCL28/PODXL2/CCL21/PTAFR/GCNT1/MADCAM1/ITGB7/LEP/ELANE	BP
tumor necrosis factor superfamily cytokine production	92/7182	161/17910	8.59352e-06	0.000122813	9.18239e-05	92	CD34/SYT11/NFATC4/ANGPT1/NOD1/C1QTNF4/PIK3R1/GAS6/THBS1/LRRK2/ISL1/IGF1/ZBTB20/AKAP12/SPON2/LY96/GPNMB/AXL/FOXP1/CD14/TLR1/CCL19/TLR4/CX3CR1/CLU/LILRA4/CD36/VSIR/TREM2/TSPO/CCR2/AZI2/SIRPA/TYROBP/ARHGEF2/TWIST1/LILRB1/CD86/ZFP36/MIR125B1/SPN/ARRB2/NLRC3/CYBB/TNFAIP3/TMEM106A/LILRA5/SLAMF1/DDT/ZC3H12A/PTPRC/FOXP3/APP/TIRAP/LPL/HAVCR2/CLEC4A/TLR2/MAPKAPK2/POMC/SASH3/ADIPOQ/RIPK1/CD2/MIF/CACTIN/GPR1…	BP
regulation of tumor necrosis factor production	87/7182	151/17910	9.59981e-06	0.000137013	0.000102441	87	CD34/SYT11/NFATC4/ANGPT1/NOD1/C1QTNF4/PIK3R1/GAS6/THBS1/LRRK2/ISL1/IGF1/ZBTB20/AKAP12/SPON2/LY96/GPNMB/AXL/FOXP1/CD14/TLR1/CCL19/TLR4/CX3CR1/CLU/LILRA4/CD36/VSIR/TREM2/TSPO/CCR2/SIRPA/TYROBP/ARHGEF2/TWIST1/LILRB1/ZFP36/MIR125B1/SPN/ARRB2/NLRC3/CYBB/TNFAIP3/LILRA5/SLAMF1/DDT/ZC3H12A/PTPRC/FOXP3/APP/TIRAP/LPL/HAVCR2/CLEC4A/TLR2/MAPKAPK2/POMC/SASH3/ADIPOQ/RIPK1/CD2/MIF/CACTIN/GPR18/FCER1G/MIR132/ORM…	BP
mesenchyme morphogenesis	36/7182	51/17910	9.97419e-06	0.000142168	0.000106295	36	HEYL/DCHS1/ENG/ACVRL1/FOXF1/ROBO1/TGFBR2/ACTA2/FGFR1/ISL1/TMEM100/BMPR1A/SNAI2/TGFBR1/NOS3/HEY2/OSR1/ACTG2/NOG/TWIST1/FOXC2/ACTC1/SOX9/TBX2/RBPJ/SNAI1/SMAD4/TGFB2/ACVR1/MDM4/HEY1/ACTA1/NOTCH1/MSX2/WNT5A/EXOC4	BP
non-canonical Wnt signaling pathway	84/7182	145/17910	1.01861e-05	0.000144998	0.00010841	84	GPC6/PRICKLE1/DACT1/FZD4/DAB2/RSPO3/DAAM2/ROR2/FZD1/ANKRD6/MAGI2/GNAO1/PRICKLE2/SFRP4/SFRP1/ABL1/SFRP2/ROR1/AGO3/FZD7/GNG2/TNRC6C/TNRC6A/AGO4/PPP3CB/TNRC6B/DAAM1/NFATC1/TIAM1/PLCB2/LEF1/FZD2/PSME2/CTHRC1/PSMA5/ARRB2/PSMD14/PSMB3/CALM1/DVL2/PSMB8/MYOC/SMURF2/MAP3K7/PPP3CA/RYK/PLCB1/DVL3/PSMA4/AP2A1/AP2A2/PSMA3/PSMA2/GNB1/MED12/AP2M1/PSMB2/PSMA1/PLCB3/PSMB9/DVL1/GRHL3/PSMD13/PSMB7/PSMD1/PSMB10/PSME…	BP
cell cycle arrest	125/7182	231/17910	1.03287e-05	0.000146833	0.000109783	125	GAS7/PKD2/APBB1/NOTCH2/MAGI2/VASH1/JMY/PKD1/TGFB1/ABL1/GAS6/THBS1/GAS1/RRAGB/ILK/FGF10/KAT2B/FAP/PPP2R5B/DUSP1/ZFHX3/PRKACA/CDK1/PRNP/TGFBR1/MAP3K20/TFDP2/PRKAG2/ING4/SETMAR/CCNB1/ATM/RRAGA/HBP1/RBL2/APBB2/CGRRF1/EVI2B/PPM1A/PCNA/DHCR24/CDKN3/CDKN1B/APC/CDC25C/IRF6/TBRG4/FOXO4/PRKAA2/CAB39L/PPP1R9B/BTG2/RGCC/E2F8/SFN/TBRG1/PRKAB2/TNKS1BP1/CNOT6L/CNOT4/INHBA/RRAGC/MUC1/CNOT11/AURKA/PLAGL1/CDKN1C/Z…	BP
integrin activation	19/7182	22/17910	1.04427e-05	0.000148197	0.000110803	19	SELP/RASIP1/FERMT2/CXCL12/TLN1/COL16A1/P2RY12/FN1/KIF14/FBLIM1/ITGB1BP1/PTGER4/PIEZO1/CDH17/FARP2/CXCL13/PLEK/SRC/CX3CL1	BP
protein acetylation	108/7182	195/17910	1.04521e-05	0.000148197	0.000110803	108	APBB1/EID1/TGFB1/NAP1L2/ISL1/TERF2IP/KAT2B/NCOA1/MECP2/CREBBP/EPC2/PER1/MYOCD/LDB1/SNAI2/ING4/GATA2/FOXO1/ESCO2/FLCN/MAPT/MORF4L1/KMT2A/EPC1/ARRB1/JADE2/TWIST1/LEF1/NUPR1/PRKAA2/TAOK1/AUTS2/SNCA/SPI1/PHF10/SGF29/SIRT1/KAT8/CAMK1/USP22/GATA3/MUC1/SMAD4/RAPGEF3/KAT5/ARNTL/KANSL3/PHF20/TADA2B/MAP3K7/TAF1/MSL2/MDH2/DPF2/FOXP3/KANSL1L/KLF15/CHEK1/JADE1/MEAF6/RSF1/BRCA1/ATF2/KANSL1/RUVBL2/KAT7/MSL3/BRD…	BP
embryonic placenta development	55/7182	87/17910	1.07763e-05	0.000152194	0.000113791	55	PKD2/RSPO3/VASH1/NRK/EPAS1/PKD1/NR2F2/PCDH12/ARNT/NCOA1/CCN1/ZFP36L1/GATA2/HEY2/KRT8/SPINT1/OVOL2/GRHL2/PLK4/ST14/SOCS3/PDGFB/KRT19/SPINT2/NSDHL/EOMES/E2F8/RBPJ/PLCD1/DNAJB6/PHLDA2/SNAI1/JUNB/CDKN1C/WNT2/HS6ST1/EGLN1/HES1/MAPK1/TFEB/HEY1/SETD2/E2F7/HIF1A/CEBPB/FZD5/ASCL2/TMED2/BPTF/STK4/BIRC6/SP3/AKT1/CASP8/TTPA	BP
tube closure	55/7182	87/17910	1.07763e-05	0.000152194	0.000113791	55	ZEB2/PRICKLE1/DLC1/CC2D2A/FZD1/SKI/TGFB1/SFRP1/ABL1/SFRP2/SUFU/SEMA4C/PRKACB/FGF10/PRKACA/SPINT1/GRHL2/TSC2/ST14/NOG/TULP3/BBS4/PTCH1/TWIST1/FZD2/SPINT2/TEAD2/CTHRC1/FUZ/TRAF6/STIL/DVL2/KIF20B/TGFB2/ARID1A/ARHGAP35/RALA/SHROOM3/SCRIB/MTHFD1/KDM2B/SEC24B/MED12/SETD2/BCL10/IFT57/RPS7/GRHL3/PLXNB2/WNT5A/TMED2/MTHFR/TSC1/FOLR1/VANGL2	BP
regulation of cyclin-dependent protein kinase activity	55/7182	87/17910	1.07763e-05	0.000152194	0.000113791	55	PKD2/LATS2/PKD1/NR2F2/KAT2B/CKS2/MYOCD/PTEN/CCNB1/CDC25A/CDKN3/CDKN1B/PDGFB/APC/PLK1/CDC25C/DIRAS3/PKMYT1/CKS1B/RGCC/SFN/TNFAIP3/CCNY/CDKN1C/ACTB/HEXIM1/CCND2/LATS1/BCCIP/HERC5/CDK5RAP3/MAPRE3/INCA1/CDKN2C/CCNC/CASP3/GADD45A/PSRC1/CDKN2D/FBXO7/HHEX/ADAM17/CDK7/CDKN2A/BLM/GTPBP4/MEN1/AKT1/SERTAD1/CCND1/SRC/CDKN2B/CCND3/CDKN1A/CDC6	BP
cardiac chamber development	96/7182	170/17910	1.08921e-05	0.000153629	0.000114864	96	TEK/HEG1/LTBP1/SLIT2/HEYL/ENG/ZFPM2/SLIT3/MEF2C/PARVA/NRP1/PDE2A/ANK2/FZD1/NOTCH2/FOXF1/ROBO1/MYH10/BMPR2/TGFBR2/GJA5/SMARCD3/SMO/ADAMTS1/TGFB1/SFRP2/NRP2/SUFU/TGFBR3/ISL1/CITED2/CCN1/CCM2L/MYOCD/RARB/HAND2/KCNK2/PLXND1/BMPR1A/TGFBR1/TPM1/SRF/NOS3/CPE/LUZP1/HEY2/OVOL2/GRHL2/SOS1/NOG/DLL4/CRELD1/FZD2/RYR2/FOXC2/SNX17/TBX2/ZBTB14/DSP/RBPJ/RXRA/MAML1/GATA3/CPLANE1/SMAD4/SAV1/TGFB2/SEMA3C/ARID1A/ACVR…	BP
gliogenesis	150/7182	285/17910	1.0939e-05	0.000154088	0.000115207	150	NDN/IL6ST/LAMA2/LPAR1/GLI3/DAAM2/LEPR/TENM4/MXRA8/CNTNAP1/VIM/ROR2/IL34/NLGN3/SKI/CSF1R/LGI4/LAMB2/GSN/GPR183/LRP1/PRKCH/BMERB1/ASPA/SUN2/SMO/TGFB1/ABL1/NRROS/LAMB1/TSPAN2/MATN2/CCL2/CSF1/ROR1/ILK/PTN/P2RY12/FGF10/IL33/CSPG4/NFIB/ADCYAP1/RTN4/SRGAP2C/TAL1/PLP1/PAFAH1B1/CDK1/TRPC4/SERPINE2/GAP43/TLR4/PTEN/DTX1/SPINT1/NFE2L1/ID4/CX3CR1/MMP14/CLU/TIAM1/GPR17/CXCR4/MAPT/CREB1/TREM2/TSPO/S100B/CCR2/NO…	BP
regulation of adaptive immune response based on somatic recombination of immune receptors built from immunoglobulin superfamily domains	79/7182	135/17910	1.10848e-05	0.000155939	0.000116591	79	IL1R1/MEF2C/CD81/HLX/TGFB1/LOXL3/SOCS5/P2RX7/FCGR2B/C3/IL33/DUSP22/CD4/CD28/CCL19/NLRP3/PPP3CB/BCL6/PKN1/IL4R/IL7R/CR1/CCR2/TNFSF4/HSPD1/LILRB1/ZBTB1/JAK3/FBXO38/TNFAIP3/GATA3/TRAF6/BTK/STX7/ZC3H12A/PTPRC/TP53BP1/TNFRSF1B/MAP3K7/SMAD7/FOXP3/TFRC/HAVCR2/IL1RL1/SUPT6H/CEACAM1/MLH1/STAT6/TNFSF13B/SASH3/PRKCZ/FCER1G/IL6/IL18R1/NFKBID/FCER2/WAS/EXOSC6/CLCF1/FOXJ1/HLA-E/C4BPB/CLEC4G/ZBTB7B/FZD5/NSD2/IL…	BP
positive regulation of DNA biosynthetic process	44/7182	66/17910	1.12991e-05	0.000158566	0.000118555	44	PDGFRB/GREM1/HGF/FGF2/SMOC2/NOX4/ATM/NEK7/GRHL2/DKC1/PAK3/PARM1/PDGFB/AURKB/ARRB2/TNKS2/MAP2K7/RGCC/RFC3/NEK2/HMBOX1/RFC4/HNRNPA2B1/HSP90AA1/CCT8/MAPK1/CCT6A/CCT3/CHTF18/CCT5/PARN/DSCC1/RFC5/MAP3K4/RFC2/TNKS/MAPK15/PTGES3/CCT7/CCT4/FGFR4/TCP1/PRKCQ/SRC	BP
regulation of interleukin-12 production	37/7182	53/17910	1.1301e-05	0.000158566	0.000118555	37	THBS1/ISL1/MAPK11/FOXP1/CCL19/TLR4/CD36/TNFSF4/HSPD1/CCR7/LILRB1/CMKLR1/JAK3/ARRB2/TRAF6/LILRA5/SLAMF1/C1QBP/CD40LG/PLCB1/TIRAP/TIGIT/TLR2/IRF5/LTB/RELA/MAPK14/NFKB1/IRAK3/IRF1/AGER/CD40/MAST2/HMGB1/RIPK2/IDO1/MDK	BP
dendrite morphogenesis	77/7182	131/17910	1.14003e-05	0.000159753	0.000119442	77	PREX2/DLG4/SDC2/LZTS1/NFATC4/RBFOX2/NRP1/KLF7/NLGN3/SHANK3/MAP6/FYN/MEF2A/TRAK2/LRRK2/ILK/PTN/SARM1/DOCK10/ITGB1/TRPC6/FBXO31/PAFAH1B1/CHRNA3/ABI2/PTEN/KIDINS220/ADGRB3/PICALM/TIAM1/NEDD4/MAP2/PDLIM5/PAK3/BHLHB9/DBN1/ID1/RAPGEF2/PTPRD/EPHA4/RAB21/ITPKA/HPRT1/FBXW8/DCLK1/VLDLR/PPP3CA/OBSL1/EEF2K/NGEF/DTNBP1/TAOK2/KALRN/EPHB1/RAP2A/LZTS3/RERE/FARP1/CUX1/CAPRIN2/YWHAH/PARP6/DHX36/LRP8/DVL1/ABITRAM/R…	BP
regulation of plasma membrane bounded cell projection assembly	94/7182	166/17910	1.14915e-05	0.000160821	0.000120241	94	SLIT2/TGFB3/RHOQ/PALM/NRP1/DPYSL3/DZIP1/DOCK11/EVL/MAP4/P2RX7/SEPTIN7/WASF2/P2RY12/FER/RDX/SRGAP2C/CEP120/PPP1R16B/CYLD/KIT/CCL19/GAP43/TGFBR1/SRF/CROCC/CCDC88A/CORO1C/EVI5L/PODXL/ARAP1/APC/PLEK2/BBS4/ANLN/EPS8L1/CCR7/CAV1/RAB17/KLF5/RIPOR2/FUZ/AUTS2/HDAC4/CDC42EP1/EPS8L2/F2RL1/IFT140/NDEL1/TENM2/TAPT1/DEF8/BRK1/ATP8B1/KANK1/ARHGAP35/KCTD17/ADAMTS16/ODF2L/EPHA2/RALA/AKIRIN1/CDC42EP5/TBC1D30/PLEKH…	BP
cellular calcium ion homeostasis	191/7182	375/17910	1.16248e-05	0.000162476	0.000121479	191	S1PR1/CLIC2/SYNPO/RAMP3/PKD2/ITPR1/HTR2A/DLG4/EDNRA/S1PR3/LPAR1/CYSLTR1/TRPC1/THY1/ANK2/BCL2/APLNR/CXCL12/PDGFRA/LRP1/FYN/F2R/ADCY5/PKD1/FGF2/TGFB1/EDNRB/ABL1/PTH1R/CCL14/PRKCB/P2RX7/RASA3/SLC8A1/ATP2B4/CACNB2/CACNA1C/DMD/CDH23/ITGAV/MYO5A/SYPL2/JPH2/PLN/AVPR1A/NCS1/C1QTNF1/DMPK/TRPC6/ADCYAP1/PRKACA/AKAP6/RIC3/C3AR1/CD4/TACR1/CCL19/ATP1A2/PRNP/CACNA2D1/ADCYAP1R1/GATA2/SV2A/ABL2/F2RL3/HTR2B/BDKRB1…	BP
negative regulation of transport	248/7182	502/17910	1.16874e-05	0.000162978	0.000121854	248	CLIC2/LRRC32/CD34/PKD2/HTR2A/DLG4/MDFIC/PRKD1/CD200/SYT11/REM1/SSC5D/PEA15/KLF7/GEM/ANGPT1/PPM1F/PKIG/EPHA3/FOXF1/BCL2/MAP1B/GNAI2/FRMD4A/GNAO1/F2R/SFRP4/TGFB1/DYSF/SFRP1/ISCU/PRKN/GAS6/THBS1/SUFU/CRYAB/LRRK2/PRKCB/FCGR2B/MCTP1/APOD/P2RY12/GNB5/ITGB3/PID1/IL33/ITGAV/ARHGAP1/KCNB1/PLN/OAZ2/RGS4/CARD8/ADCYAP1/GPM6B/RAP1A/RAB23/KCNAB1/RGS2/RAB11FIP3/CRBN/FN1/SERPINE2/RAB11FIP5/ATP1A2/SNX33/NLRP3/ARL…	BP
mitotic spindle organization	59/7182	95/17910	1.16909e-05	0.000162978	0.000121854	59	EML1/SUN2/PKD1/ANKRD53/TACC1/MAP4/FLNA/MAP9/GNAI1/MECP2/CEP126/POC1A/CCNB1/CHMP4C/SPC25/CLASP1/CDC20/DCTN1/PLK1/RCC1/AURKB/NUMA1/ARHGEF10/DYNC1H1/KIF11/KIF4A/TTK/KIF23/TPX2/CLASP2/RACGAP1/STIL/MYBL2/KIFC1/CENPE/NDC80/STAG1/BCCIP/WDR62/PRC1/RAN/TACC3/BORA/CHMP1B/PSRC1/RAB11A/TNKS/CHEK2/TACC2/MISP/SBDS/STMN1/RHOA/CHMP5/CHMP2B/GOLGA2/RAE1/GPSM2/HSPA1B	BP
negative regulation of adherens junction organization	17/7182	19/17910	1.17331e-05	0.000163354	0.000122135	17	DLC1/ACVRL1/LRP1/PHLDB2/THBS1/FAM107A/APOD/RDX/ARHGAP6/DUSP22/PTEN/CORO1C/MMP14/CLASP2/ITGB1BP1/SRC/RCC2	BP
negative regulation of apoptotic signaling pathway	121/7182	223/17910	1.19727e-05	0.000166446	0.000124447	121	AR/HGF/PEA15/NRP1/BCL2/CXCL12/GNAI2/MEIS3/FYN/PRKN/SFRP2/THBS1/LRRK2/PINK1/IGF1/FGF10/ITGAV/ACKR3/SNAI2/TGFBR1/NOS3/PELI3/ITPRIP/SLC25A5/CFLAR/CX3CR1/CLU/ZMYND11/TAF9B/NOG/MAP2K5/ARHGEF2/NDUFS3/ARRB2/BDKRB2/YBX3/SIRT1/SNAI1/TNFAIP3/HMGB2/MUC1/USP47/PPIF/MAPK7/ZNF385A/MCL1/HDAC1/MAPK8IP1/YAP1/ACVR1/MNT/FAIM2/TRIM32/DDIAS/BRCA1/SH3RF1/ITGA6/MARCHF7/FAS/RELA/RIPK1/FIGNL1/MIF/PTPN1/SCG2/SERPINE1/ENO1…	BP
alpha-beta T cell differentiation	61/7182	99/17910	1.1986e-05	0.000166446	0.000124447	61	GLI3/RORA/BCL2/TGFBR2/GPR183/HLX/LOXL3/SOCS5/ABL1/ZBTB16/ITPKB/SATB1/FOXP1/CCL19/NLRP3/BCL6/IL4R/NCKAP1L/TNFSF4/CD83/LEF1/CD86/STAT3/SPN/JAK3/EOMES/SLAMF6/GATA3/LY9/ZC3H12A/MYB/SMAD7/PNP/FOXP3/ZAP70/SH3RF1/STAT6/SASH3/NKX2-3/PRKCZ/GPR18/RUNX1/PTGER4/IL6/RELB/IL18R1/ATP7A/NFKBID/RORC/TMEM98/BCL11B/ZBTB7B/IRF1/RHOA/IL12RB1/RUNX3/HMGB1/IRF4/RC3H1/RIPK2/ANXA1	BP
negative regulation of nervous system development	152/7182	290/17910	1.28513e-05	0.000178234	0.00013326	152	CNTN4/NR2F1/PMP22/SLIT2/DENND5A/LPAR1/ARHGEF15/SPART/NFATC4/GLI3/DAAM2/THY1/NRP1/DPYSL3/VIM/PBX1/NLGN3/SKI/MEIS1/NOTCH3/LRP1/BMERB1/SEMA3G/TGFB1/TRAK2/EDNRB/RGMA/SUFU/LRRK2/HOOK3/SYNGAP1/DIXDC1/CRMP1/PTN/ULK2/ISL1/COL3A1/LGALS1/PRKACB/NTN1/MYLIP/ASAP1/NGFR/TRPC6/ADCYAP1/RTN4/PRKACA/SRGAP2C/PAFAH1B1/SPOCK1/GPR173/BMPR1A/ZHX2/TNN/GPR161/RUFY3/PTPRS/PTEN/DTX1/STMN2/INPP5F/RAB29/ID4/MAP2/TSPO/NOG/ISL…	BP
lipid metabolic process	610/7182	1338/17910	1.29228e-05	0.000178995	0.000133829	610	IGFBP7/CYP2U1/PLPP1/QKI/TEK/HACD4/GGT5/JAZF1/PDGFRB/HTR2A/C1QTNF2/GPC6/CYP1B1/PRKD1/PLCL1/SDC2/PTGIS/DHH/RGL1/CYGB/CREBL2/PLPP3/STAT5B/RORA/LEPR/CYP7B1/DKK3/CH25H/ST6GALNAC5/TTC7B/SERINC1/CYB5R3/PBX1/HSPG2/CSF1R/PIP4K2A/PDGFRA/SMARCD3/LRP1/SMPD1/CD81/ADGRF5/ALDH1A3/ST6GALNAC6/FGF2/TGFB1/RARRES2/NR2F2/PIK3IP1/FGF1/SOCS5/PIP5K1C/PIK3R1/PDE3A/INPP4A/CRTC3/ABCA1/PIP4P2/CACNA1H/P2RX7/FGFR1/SIN3B/SDC3/…	BP
purine ribonucleoside triphosphate metabolic process	163/7182	314/17910	1.29674e-05	0.000179382	0.000134119	163	HTR2A/RHOQ/FAM20C/GIMAP7/TGFB1/ISCU/LRRK2/PINK1/P2RX7/PRXL2C/IGF1/ARNT/ZBTB20/PID1/MECP2/COX5A/NME1/ADCYAP1/RAB23/CDK1/MOCS1/ATP5MC1/ATP1A2/COX6A1/PRKAG2/ATP5MC3/CCNB1/UQCRH/SLC25A12/FLCN/COX5B/CBFA2T3/UQCRC1/COA6/TREM2/TSPO/ATP5IF1/ATP1B1/AMPD3/NDUFB3/ATP5F1C/CYC1/ATP5MF/NDUFS3/STAT3/NUPR1/PRKAA2/ATP5F1B/COX8A/UQCRQ/TPI1/UQCC3/ITPA/NUP37/SHMT2/SNCA/COX6B1/MOCOS/HDAC4/ATP5ME/JMJD8/ENPP1/INSR/PPIF…	BP
aortic valve development	25/7182	32/17910	1.3291e-05	0.000183389	0.000137114	25	ELN/EMILIN1/SLIT2/HEYL/SLIT3/ROBO1/BMPR2/TGFB1/SNAI2/NOS3/HEY2/NFATC1/ROCK1/DLL4/TNFRSF1A/TWIST1/SOX9/RBPJ/SNAI1/GATA3/TNFRSF1B/NOTCH1/EFNA1/ROCK2/JAG1	BP
cardiac epithelial to mesenchymal transition	25/7182	32/17910	1.3291e-05	0.000183389	0.000137114	25	HEYL/ENG/TGFBR2/SPRY1/TGFBR3/TMEM100/RTN4/OLFM1/SNAI2/TGFBR1/HEY2/NOG/TWIST1/RBPJ/SNAI1/SMAD4/TGFB2/ACVR1/HAS2/WNT2/HEY1/NOTCH1/MSX2/EFNA1/JAG1	BP
protein ubiquitination	376/7182	794/17910	1.33797e-05	0.000184377	0.000137853	376	FBXL7/SEPTIN4/RNF180/PRICKLE1/KCTD10/MARCHF2/WWTR1/SH3RF3/RNF217/SPSB1/HECTD2/RNF130/ANGPT1/BCL2/RNF144A/PDZRN3/NEURL1B/MID2/EPAS1/PJA2/PHC1/FYN/UBE2E2/RNF150/IRF2BPL/DYSF/SOCS5/PRKN/ABL1/KLHL20/RNF146/RNF122/RASD2/FAM107A/LRRK2/NSMCE3/PINK1/TRIM23/NXN/HERC1/FBXL5/SASH1/RNF11/FBXO32/DTX3/UBE2T/ZBTB16/MYLIP/ASB2/MARCHF8/DCAF5/UNKL/FBXL17/ADRB2/TRIM6/FBXO31/LNPEP/RNF24/CRBN/ARRDC3/RNF216/RNF38/UBE2…	BP
platelet activation	87/7182	152/17910	1.36674e-05	0.000188102	0.000140638	87	ITPR1/SELP/PRKG1/PEAR1/F8/VWF/PDGFRA/TLN1/PRKCH/FYN/F2R/SH2B3/PIK3R1/GAS6/THBD/GNA12/PRKCB/ILK/COL1A2/COL3A1/P2RY12/F2RL2/ITGB3/FLNA/VCL/MYL9/MYH9/C1QTNF1/PIK3R5/PIK3R6/TRPC6/GNG2/GNA14/PIK3CA/CSRP1/SERPINE2/MERTK/PDPN/SRF/NOS3/TLR4/F2RL3/COL1A1/GNAQ/PDGFB/ARRB1/PRKCE/ARRB2/DGKG/LCP2/CD40LG/ACTB/CLIC1/SLC7A11/MAPK1/YWHAZ/CEACAM1/GNA13/DGKH/PDPK1/GNB1/METAP1/PRKCD/FCER1G/PIK3CG/GP1BA/IL6/PTPN11/PR…	BP
regulation of transmembrane receptor protein serine/threonine kinase signaling pathway	117/7182	215/17910	1.38501e-05	0.000190373	0.000142336	117	EMILIN1/LDLRAD4/LTBP1/FBN1/ENG/ZNF423/DAB2/TGFB3/GREM1/ZEB1/WWTR1/ACVRL1/DKK3/ASPN/FZD1/MAGI2/SKI/BMPR2/TGFBR2/LTBP4/CHRDL1/TGFB1I1/GDF6/SFRP4/TGFB1/TWSG1/SFRP1/CILP/ABL1/SFRP2/THBS1/NRROS/HTRA1/TGFBR3/HTRA3/ILK/BMPER/RBPMS/FGF10/SULF1/CITED2/CCN1/CREBBP/GREM2/RBPMS2/MYOCD/BMPR1A/TGFBR1/VASN/BMP6/LOX/GDF10/GOT1/OVOL2/GLG1/FLCN/ACVR2A/CCN3/PPM1A/NOG/PELO/CHRD/CAV1/NUMA1/ITGA8/ADAMTSL2/BCL9L/FSTL3/…	BP
regulation of adaptive immune response	86/7182	150/17910	1.39819e-05	0.000191696	0.000143326	86	IL6ST/IL1R1/MEF2C/CD81/HLX/TGFB1/LOXL3/SOCS5/P2RX7/FCGR2B/C3/IL33/DUSP22/CD4/CD28/CCL19/NLRP3/PPP3CB/BCL6/PKN1/IL4R/IL7R/CR1/CCR2/TNFSF4/HSPD1/LILRB1/ZBTB1/JAK3/CD48/SIRT1/FBXO38/TNFAIP3/GATA3/TRAF6/BTK/STX7/ADCY7/ZC3H12A/PTPRC/TP53BP1/TNFRSF1B/MAP3K7/SAMSN1/SMAD7/FOXP3/TFRC/HAVCR2/IL1RL1/SUPT6H/CEACAM1/MLH1/STAT6/TNFSF13B/SASH3/PRKCZ/FCER1G/IL6/EIF2AK4/IL18R1/NFKBID/FCER2/WAS/EXOSC6/CLCF1/FOXJ1/…	BP
regulation of mitotic nuclear division	86/7182	150/17910	1.39819e-05	0.000191696	0.000143326	86	PDGFRB/TGFB1/IGF1/CCDC8/MAP9/DAPK3/DUSP1/CD28/CCNB1/ATM/HECW2/MAD2L1/CHMP4C/NFE2L1/CDC20/DLGAP5/CDKN1B/PDGFB/APC/PLK1/RCC1/AURKB/SIRT2/ANLN/CDC25C/PKMYT1/UBE2C/NUMA1/BUB1B/NUSAP1/CDT1/KIF11/PPP1R9B/RGCC/MKI67/TOM1L2/TTK/ATRX/KLHL22/CDCA5/TRIP13/NEK2/ESPL1/INSR/CENPF/PIN1/AURKA/CDKN1C/SMPD3/SLF2/KIF20B/CENPE/AURKAIP1/NDC80/TOM1L1/OBSL1/STAG1/CHEK1/SH2B1/BTC/TGFA/KNTC1/IK/MACROH2A1/TACC3/BORA/CHMP1…	BP
CD4-positive, alpha-beta T cell differentiation	48/7182	74/17910	1.41606e-05	0.0001939	0.000144973	48	RORA/GPR183/HLX/LOXL3/SOCS5/SATB1/FOXP1/CCL19/NLRP3/BCL6/IL4R/NCKAP1L/TNFSF4/CD83/LEF1/CD86/STAT3/SPN/JAK3/SLAMF6/GATA3/LY9/ZC3H12A/MYB/SMAD7/FOXP3/SH3RF1/STAT6/SASH3/NKX2-3/PRKCZ/RUNX1/PTGER4/IL6/RELB/IL18R1/ATP7A/NFKBID/RORC/TMEM98/ZBTB7B/IL12RB1/RUNX3/HMGB1/IRF4/RC3H1/RIPK2/ANXA1	BP
cellular response to peptide hormone stimulus	155/7182	297/17910	1.43988e-05	0.000196912	0.000147225	155	FBN1/RAB31/RHOQ/GLP2R/STAT5B/LEPROT/ADCY4/SESN3/MAP1B/ADCY9/GNAI2/GHR/GAB1/FYN/ADCY5/TGFB1/RARRES2/PIK3R1/HDAC5/PRKCB/ATP6V1G2/VAMP2/PRKACB/SORBS1/PID1/KAT2B/MYO5A/FER/PRKAR2B/SOGA1/PRKACA/ZFP36L1/KL/MBD5/PIK3CA/GPR173/ADCY2/PTEN/FOXO1/PRKAR1A/GOT1/CCNA2/CFLAR/SLC2A4/STAT5A/AGTR1/SHC1/TSC2/SOS1/SIK2/INPP5K/CREB1/ARID1B/ADCY3/APC/OSBPL8/ROCK1/SOCS2/SRSF5/ESRRA/MYO1C/CAV1/FOXC2/NR4A3/STAT3/PDK4/FOX…	BP
morphogenesis of embryonic epithelium	84/7182	146/17910	1.46075e-05	0.000199512	0.000149169	84	ZEB2/VEGFC/PRICKLE1/DLC1/GREM1/AR/GLI2/CC2D2A/FZD1/SKI/TGFB1I1/ALDH1A3/TGFB1/SFRP1/ABL1/SFRP2/WNT2B/SUFU/SEMA4C/PRKACB/FGF10/SULF1/TCTN1/KDF1/PRKACA/SPINT1/OVOL2/OSR1/GRHL2/TSC2/ST14/NOG/TULP3/BBS4/PTCH1/TWIST1/FZD2/SPINT2/TEAD2/SOX9/CTHRC1/FUZ/TFAP2A/GATA3/TRAF6/STIL/DVL2/KIF20B/TGFB2/ARID1A/WNT2/ARHGAP35/IFT52/LAMA5/IRX2/RALA/SHROOM3/SCRIB/MTHFD1/GRSF1/KDM2B/SEC24B/MED12/PDX1/SETD2/RET/BCL10/IF…	BP
interaction with host	115/7182	211/17910	1.4884e-05	0.000203032	0.000151801	115	GUCY1A1/HTR2A/MID2/GSN/CD81/TGFB1/PRKN/GAS6/LGALS1/ITGB3/ITGAV/AXL/ITGB5/ITGB1/UVRAG/HYAL2/CD4/KPNA5/CDK1/SELPLG/EPS15/RRAGA/TRIM15/CD209/CHMP4C/ITGA5/TRIM8/EXOC7/FCN1/CXCR4/NEDD4/CR1/MRC1/TRIM38/PPIA/F11R/NCAM1/CDH1/CAV1/SCARB2/CD86/VAMP8/RXRA/KPNA2/EFNB3/THOC3/CCR5/INSR/SLC52A2/PTX3/SLAMF1/VPS18/IFITM2/CXADR/ZC3H12A/NECTIN4/ATG7/TYMS/TFRC/TRIM32/CD46/TRIM62/SNX3/THOC5/HYAL3/EPHA2/CBL/TMPRSS2/ZN…	BP
ribonucleoside triphosphate metabolic process	165/7182	319/17910	1.49728e-05	0.000203986	0.000152514	165	HTR2A/RHOQ/FAM20C/GIMAP7/TGFB1/ISCU/LRRK2/PINK1/P2RX7/PRXL2C/IGF1/ARNT/ZBTB20/PID1/MECP2/COX5A/NME1/ADCYAP1/RAB23/CDK1/MOCS1/ATP5MC1/ATP1A2/COX6A1/PRKAG2/ATP5MC3/CCNB1/UQCRH/SLC25A12/FLCN/COX5B/CBFA2T3/UQCRC1/COA6/TREM2/TSPO/ATP5IF1/ATP1B1/AMPD3/NDUFB3/ATP5F1C/CYC1/ATP5MF/NDUFS3/STAT3/NUPR1/PRKAA2/ATP5F1B/COX8A/UQCRQ/TPI1/UQCC3/ITPA/NUP37/SHMT2/SNCA/COX6B1/MOCOS/HDAC4/ATP5ME/JMJD8/ENPP1/INSR/PPIF…	BP
positive regulation of tumor necrosis factor production	50/7182	78/17910	1.53569e-05	0.000208955	0.000156229	50	NFATC4/NOD1/C1QTNF4/PIK3R1/THBS1/LRRK2/ISL1/ZBTB20/AKAP12/SPON2/LY96/CD14/TLR1/CCL19/TLR4/CLU/CD36/CCR2/TYROBP/ARHGEF2/TWIST1/SPN/CYBB/LILRA5/DDT/PTPRC/APP/TIRAP/LPL/HAVCR2/TLR2/MAPKAPK2/SASH3/RIPK1/CD2/MIF/FCER1G/ORM2/PTPN11/DDX58/PTAFR/HLA-E/FZD5/RASGRP1/WNT5A/AGER/LEP/HDAC2/HSPB1/RIPK2	BP
negative regulation of cell development	164/7182	317/17910	1.56283e-05	0.00021238	0.00015879	164	CNTN4/NR2F1/PMP22/SLIT2/FBN1/NPR2/DENND5A/FBLN1/S1PR3/LPAR1/SPART/NFATC4/GLI3/DAAM2/THY1/FRZB/NRP1/DPYSL3/VIM/BCL2/PBX1/NLGN3/SKI/MEIS1/NOTCH3/LRP1/BMERB1/SEMA3G/TGFB1/TRAK2/EDNRB/RGMA/LRRK2/HOOK3/SYNGAP1/DIXDC1/CRMP1/PTN/ULK2/ISL1/IGF1/COL3A1/LGALS1/PI16/NTN1/MYLIP/RGS4/ASAP1/NGFR/TRPC6/ADCYAP1/RTN4/SRGAP2C/RGS2/PAFAH1B1/SPOCK1/GPR173/BMPR1A/ZHX2/TNN/RUFY3/PTPRS/PTEN/DTX1/STMN2/INPP5F/CORO1C/RAB…	BP
antigen processing and presentation of peptide antigen	104/7182	188/17910	1.61599e-05	0.000219327	0.000163985	104	AP1M1/FCGR2B/MR1/CTSF/ITGAV/ITGB5/SEC23A/LNPEP/MARCHF1/SEC31A/AP1M2/KIF3C/DYNC1I1/CD209/DYNC1LI2/ACTR1A/KLC1/CD36/OSBPL1A/TREM2/DCTN1/AP1S1/KIF2C/PSME2/VAMP8/DYNC1H1/KIF11/KIF15/PSMA5/KIF4A/CTSL/AP1S2/PSMD14/AP1S3/KIFAP3/CYBB/KIF18A/KIF23/TRAF6/RACGAP1/PSMB3/PSMB8/CENPE/ACTR10/KIF22/PDIA3/CAPZB/BCAP31/KIF3A/CLEC4A/PSMA4/AP2A1/SNAP23/AP2A2/PSMA3/PSMA2/LGMN/TAP1/IKBKB/HLA-DPB1/DCTN5/SEC24B/DCTN4/SE…	BP
protein localization to chromosome	52/7182	82/17910	1.63757e-05	0.000221976	0.000165965	52	TINF2/TERF2IP/CDK1/ESCO2/CENPA/DKC1/MAU2/PLK1/AURKB/EZH2/GNL3/BUB1B/CDT1/TNKS2/TTK/ATRX/SGF29/CDCA5/MRNIP/HASPIN/KNL1/SLF2/NDC80/TRAPPC12/CCT8/CHMP7/CCT6A/RUVBL2/CCT3/IK/CCT5/MACROH2A1/BRCA2/BUB3/SETD2/TNKS/MACROH2A2/H1-5/SPDL1/CCT7/MCM8/CCT4/BOD1/TCP1/TASOR/TERF2/SPIDR/RAD21/WAPL/GNL3L/RCC2/CENPQ	BP
positive regulation of DNA metabolic process	120/7182	222/17910	1.64281e-05	0.000222408	0.000166288	120	PDGFRB/GLI1/APBB1/GREM1/HGF/GLI2/FGF2/SMOC2/TGFB1/FGFR1/FAM168A/FGF10/NOX4/MECP2/CDK1/CD28/SETMAR/ATM/NEK7/ATF7IP/GRHL2/DKC1/PCNA/PAK3/PARM1/PDGFB/TNFSF4/ZNF304/AURKB/CTC1/GNL3/CDT1/SPIRE1/ARRB2/TNKS2/JUN/WIZ/MAP2K7/RGCC/E2F8/RFC3/ATRX/SIRT1/NEK2/RAD51/SPIRE2/MRNIP/HMBOX1/ERCC1/RFC4/PTPRC/TP53BP1/SLF2/ENDOG/MPHOSPH8/DNA2/HNRNPA2B1/ANXA3/TFRC/HSP90AA1/BRCA1/CCT8/WT1/H2AX/MAPK1/CCT6A/MLH1/STAT6/CCT…	BP
carboxylic acid metabolic process	467/7182	1006/17910	1.65392e-05	0.000223547	0.00016714	467	CYP2U1/QKI/HACD4/GGT5/DCN/HTR2A/C1QTNF2/CYP1B1/CRTAP/PTGIS/BHMT2/CYGB/ITIH5/HGF/CYP7B1/CH25H/BGN/CYB5R3/VCAN/CDO1/DSEL/DSE/ASPA/ALDH1A3/FGF2/TGFB1/CHST12/AASS/MTR/FOLR2/PPM1K/CHST14/ITIH3/P2RX7/PRXL2C/GFPT2/PLA2G4C/IGF1/ARNT/ZBTB20/ATP2B4/PAM/ABCD2/NOX4/C3/DEGS1/MYO5A/MECP2/ACACB/CSPG4/OAZ2/AVPR1A/CREM/PRKAR2B/NAGK/HYAL2/PTGDS/PLP1/LTC4S/KIT/PTGS1/ADHFE1/AOAH/PRKAG2/NOS3/LYVE1/HMMR/GSTO2/PDPR/FAD…	BP
alpha-beta T cell activation involved in immune response	41/7182	61/17910	1.65744e-05	0.000223547	0.00016714	41	RORA/GPR183/HLX/LOXL3/SOCS5/FOXP1/CCL19/NLRP3/BCL6/IL4R/TNFSF4/LEF1/CD86/STAT3/SPN/JAK3/EOMES/SLAMF6/GATA3/LY9/ZC3H12A/MYB/SMAD7/FOXP3/STAT6/PRKCZ/PTGER4/IL6/RELB/IL18R1/ATP7A/NFKBID/RORC/TMEM98/ZBTB7B/IL12RB1/HMGB1/IRF4/RC3H1/RIPK2/ANXA1	BP
alpha-beta T cell differentiation involved in immune response	41/7182	61/17910	1.65744e-05	0.000223547	0.00016714	41	RORA/GPR183/HLX/LOXL3/SOCS5/FOXP1/CCL19/NLRP3/BCL6/IL4R/TNFSF4/LEF1/CD86/STAT3/SPN/JAK3/EOMES/SLAMF6/GATA3/LY9/ZC3H12A/MYB/SMAD7/FOXP3/STAT6/PRKCZ/PTGER4/IL6/RELB/IL18R1/ATP7A/NFKBID/RORC/TMEM98/ZBTB7B/IL12RB1/HMGB1/IRF4/RC3H1/RIPK2/ANXA1	BP
ERK1 and ERK2 cascade	151/7182	289/17910	1.70364e-05	0.000229491	0.000171584	151	TEK/RAMP3/EMILIN1/PDGFRB/HTR2A/MAP3K12/FBLN1/TIMP3/NRP1/ANGPT1/GLIPR2/NOTCH2/CSF1R/PDGFRA/NOD1/CCN2/GNAI2/FLT4/GPR183/LRP1/LMO3/F2R/FGF2/TGFB1/SPRY1/ABL1/GAS6/CAVIN3/DUSP26/PRXL2C/BMPER/DUSP3/KDR/IGF1/TNFAIP8L3/FGF10/NOX4/AKAP12/ITGAV/DSTYK/CCN1/RAPGEF1/GPNMB/DUSP1/ADCYAP1/HAND2/RAP1A/ACKR3/ZFP36L1/RRAS/CD4/FN1/CCL19/TLR4/HTR2B/PTEN/NPTN/DNAJC27/CFLAR/FLCN/SHC1/TIAM1/CD36/SCIMP/EZR/TREM2/PDGFB/SI…	BP
neural tube closure	54/7182	86/17910	1.72118e-05	0.000230989	0.000172704	54	ZEB2/PRICKLE1/DLC1/CC2D2A/FZD1/SKI/TGFB1/SFRP1/ABL1/SFRP2/SUFU/SEMA4C/PRKACB/PRKACA/SPINT1/GRHL2/TSC2/ST14/NOG/TULP3/BBS4/PTCH1/TWIST1/FZD2/SPINT2/TEAD2/CTHRC1/FUZ/TRAF6/STIL/DVL2/KIF20B/TGFB2/ARID1A/ARHGAP35/RALA/SHROOM3/SCRIB/MTHFD1/KDM2B/SEC24B/MED12/SETD2/BCL10/IFT57/RPS7/GRHL3/PLXNB2/WNT5A/TMED2/MTHFR/TSC1/FOLR1/VANGL2	BP
mitotic DNA damage checkpoint	54/7182	86/17910	1.72118e-05	0.000230989	0.000172704	54	FOXN3/FBXO31/CDK1/TFDP2/CCNB1/ATM/RBL2/XPC/BRSK1/PCNA/CDKN1B/CDC25C/FOXO4/BTG2/RGCC/E2F8/SFN/TAOK1/TNKS1BP1/CNOT6L/CNOT4/NOP53/MUC1/CLSPN/MRNIP/CNOT11/AURKA/PLAGL1/ZNF385A/GTSE1/CDK5RAP3/TIPIN/TAOK2/MDM4/ATF2/E2F1/GADD45A/CNOT8/DONSON/E2F7/PLK3/CHEK2/EP300/PML/GIGYF2/TFDP1/CNOT9/RINT1/TRIAP1/BLM/RFWD3/SYF2/CCND1/CDKN1A	BP
regulation of protein tyrosine kinase activity	54/7182	86/17910	1.72118e-05	0.000230989	0.000172704	54	DLG4/GREM1/THY1/CSF1R/FYN/SOCS5/GAS6/NOX4/TAL1/HYAL2/DUSP22/PRNP/SHC1/CASS4/DLG3/PDGFB/ADORA1/DOCK3/CAV1/EPHA4/NEDD9/PTK6/LILRA5/DVL2/ALKAL1/ERBB3/NCAPG2/PTPRC/CBLC/AGT/APP/VPS25/TGFA/PTPN1/NCK2/GPRC5A/CHMP6/FCGR1A/LRP8/NCF1/DOK7/ADRA2A/ADAM17/ERRFI1/RELN/IBTK/EFNA1/UNC119/NTRK2/SNX6/CD24/SRC/SOCS4/AFAP1L2	BP
translational elongation	73/7182	124/17910	1.76668e-05	0.000236801	0.000177049	73	DIO2/MRPL12/DNAJC24/ABTB1/MRPL23/MRPL52/MRPL48/MRPS5/MRPL27/MRPL3/EIF5A/CPEB2/MRPL15/MRPS34/EEF2/MRPL13/MRPS2/EEF1A1/AURKAIP1/MRPL37/EEF2K/PTCD3/MRPS12/MRPL58/MRPL50/MRPL44/EIF5AL1/MRPL17/CHCHD1/MRPL16/DPH3/MRPL35/MRPL36/MRPL22/TUFM/TSFM/MRPL14/MRPL41/MRPS28/MRPL21/MRPS9/MRPS25/DPH1/MRPS15/MRPS26/MRPL18/MRPS14/MRPL32/MRPS33/MRPL2/MRPL57/MRPS17/MRPS23/MRPS35/MRPL19/MRPS30/ERAL1/DPH2/MRPS7/MRPL11/M…	BP
phagocytosis, engulfment	30/7182	41/17910	1.77806e-05	0.000238031	0.000177969	30	RAB31/MFGE8/GSN/THBS1/ABCA1/FCGR2B/ELMO1/C3/MYH9/ANO6/AIF1/GATA2/ITGAM/MSR1/DOCK1/NCKAP1L/CD36/TREM2/BIN2/F2RL1/ARHGAP25/ITGB2/CD300A/FCER1G/ARHGAP12/PPARG/FCGR1A/SH3BP1/BECN1/XKR8	BP
phosphatidylinositol metabolic process	90/7182	159/17910	1.78507e-05	0.000238673	0.000178449	90	PDGFRB/HTR2A/TTC7B/CSF1R/PIP4K2A/FGF2/PIP5K1C/PIK3R1/INPP4A/PIP4P2/PLA2G4C/INPP5B/PIK3R5/PIK3R6/FAM126A/INPP5A/PIK3CA/PLEKHA4/CDS1/HTR2B/PTEN/ATM/PIK3CD/SYNJ1/BMX/INPP5F/PTPN13/MTMR9/INPP5K/PITPNM2/PLEKHA3/CDIPT/PDGFB/SLC27A1/PLEKHA2/SH3YL1/PLCD4/PIK3R3/PIP4K2B/IP6K1/PI4K2B/PLA2G5/PIP5K1B/PI4KB/TMEM150A/PI4K2A/PIGK/PGAP2/BPNT1/PIKFYVE/RUFY1/MTMR6/DPM2/PLCB1/PLA2G4F/PIK3C2A/PITPNM3/INPP4B/PIK3C3/I…	BP
primary neural tube formation	57/7182	92/17910	1.81285e-05	0.000242088	0.000181002	57	ZEB2/PRICKLE1/DLC1/CC2D2A/FZD1/SKI/TGFB1/SFRP1/ABL1/SFRP2/SUFU/SEMA4C/PRKACB/PRKACA/SPINT1/OVOL2/GRHL2/TSC2/ST14/NOG/TULP3/BBS4/PTCH1/TWIST1/FZD2/SPINT2/TEAD2/CTHRC1/FUZ/TRAF6/STIL/DVL2/KIF20B/TGFB2/ARID1A/ARHGAP35/RALA/SHROOM3/SCRIB/MTHFD1/KDM2B/SEC24B/MED12/SETD2/BCL10/IFT57/RPS7/HIF1A/GRHL3/PLXNB2/WNT5A/TMED2/MTHFR/TSC1/FOLR1/CFL1/VANGL2	BP
cellular cation homeostasis	254/7182	518/17910	1.81668e-05	0.000242299	0.00018116	254	CYBRD1/S1PR1/CLIC2/SYNPO/RAMP3/PKD2/ITPR1/HTR2A/DLG4/EDNRA/S1PR3/LPAR1/CYSLTR1/TRPC1/CLIC4/THY1/ATP1B2/ANK2/BCL2/C7/APLNR/CXCL12/PDGFRA/SLC39A13/LRP1/SLC22A17/FYN/F2R/ADCY5/PKD1/FGF2/KCTD7/TGFB1/EDNRB/ABL1/PTH1R/CCL14/LRRK2/PRKCB/ATP6V1G2/P2RX7/FBXL5/RASA3/SLC8A1/ATP2B4/CACNB2/KCNMA1/CACNA1C/DMD/CDH23/ITGAV/MYO5A/SYPL2/JPH2/PLN/AVPR1A/NCS1/C1QTNF1/DMPK/TRPC6/ADCYAP1/PRKACA/AKAP6/RIC3/C3AR1/CD4/TA…	BP
microtubule polymerization or depolymerization	58/7182	94/17910	1.83476e-05	0.000244409	0.000182737	58	MAP7D3/CLIP3/NAV3/TTBK2/HDGFL3/NCKAP5L/MAP1B/BMERB1/ANKRD53/ABL1/CRYAB/MECP2/FES/NIN/TOGARAM1/STMN2/SKA3/MAPT/CLASP1/MAP2/CDKN1B/APC/DCTN1/SLAIN2/ARHGEF2/KIF2C/NUMA1/DYRK1A/CLIP1/TAOK1/SNCA/KIF18B/KIF18A/CLASP2/RANBP9/CAMSAP2/SKA1/ARL2/FKBP4/TUBGCP6/KIF24/EML2/CIB1/CKAP2/PRUNE1/PSRC1/TUBB4A/CAMSAP3/STMN1/CSNK1D/FBXO5/RAC1/PAK1/CDK5RAP2/GOLGA2/MID1/TBCD/HSPA1B	BP
phosphatidylinositol biosynthetic process	68/7182	114/17910	1.85558e-05	0.000246877	0.000184583	68	HTR2A/PIP4K2A/FGF2/PIP5K1C/PIK3R1/INPP4A/PIK3R5/PIK3R6/PIK3CA/PLEKHA4/CDS1/HTR2B/PTEN/ATM/PIK3CD/SYNJ1/BMX/INPP5F/PTPN13/MTMR9/INPP5K/PITPNM2/PLEKHA3/CDIPT/PDGFB/SLC27A1/PLEKHA2/SH3YL1/PIK3R3/PIP4K2B/PI4K2B/PIP5K1B/PI4KB/PI4K2A/PIGK/PGAP2/PIKFYVE/RUFY1/MTMR6/DPM2/PIK3C2A/PITPNM3/INPP4B/PIK3C3/INPP5D/PIK3CG/AGAP2/OCRL/FIG4/PYURF/PIGU/MTMR12/PIGO/PIP4K2C/PIGW/PI4KA/PIGN/INPP5E/INPPL1/PIK3R4/SBF1/DP…	BP
mucopolysaccharide metabolic process	67/7182	112/17910	1.86704e-05	0.000247841	0.000185304	67	DCN/CSGALNACT2/LUM/OMD/ARSB/PRELP/ITIH5/HGF/OGN/CHST7/ANGPT1/BGN/CHSY3/VCAN/DSEL/DSE/NDST1/FGF2/TGFB1/ST3GAL3/CHST12/CHST14/ITIH3/CHST1/CSPG4/HYAL2/EGFLAM/XYLT1/ST3GAL2/LYVE1/HMMR/IDS/CHSY1/ST3GAL4/PDGFB/KERA/FMOD/CHST3/CSGALNACT1/CHP1/B4GAT1/UST/HAS1/SLC35D2/B3GNT3/SMPD3/PIM1/CHST15/HAS2/GNS/AP2A1/HYAL3/HEXA/NDNF/HYAL1/ST3GAL1/NFKB1/IDUA/SLC9A1/GALNS/HAS3/CHST11/AKT1/HEXB/CHPF2/B4GALT2/CHST2	BP
[truncated: 940 more rows]

## Sheet: KEGG
Description	GeneRatio	BgRatio	P value	P adjust	Q value	Count	Gene ID	Other
[truncated: 150 more rows]
