# Supplementary material for: Clinical and Biological Significances of FBLN5 in Gastric Cancer
Source: Cancers (Basel). 2023 Jan 16;15(2):553. doi: 10.3390/cancers15020553 (PMC9856449; doi:10.3390/cancers15020553)
Supplement: Supplementary file 1 [file cancers-15-00553-s001.zip › Supplementary Table S4.xlsx]

## Sheet: supplementary file 4
id	name	SIZE	ES	NES	NOM p-val	FDR q-val	Genes
HALLMARK_EPITHELIAL_MESENCHYMAL_TRANSITION	http://www.broadinstitute.org/gsea/msigdb/cards/HALLMARK_EPITHELIAL_MESENCHYMAL_TRANSITION	195	0.772107	2.11749	0	0	COL3A1;COL5A2;COL5A1;FBN1;COL1A1;FN1;COL6A3;SERPINE1;COL1A2;COL4A1;COL4A2;VCAN;IGFBP3;TGFBI;SPARC;LUM;LAMC1;LOX;LAMC2;CTGF;TAGLN;COL7A1;LOXL2;COL6A2;ITGAV;THBS2;COL16A1;NNMT;TPM1;CDH2;MMP2;COL11A1;THBS1;FAP;BGN;SERPINH1;FSTL1;POSTN;THY1;SPP1;TNC;TFPI2;NID2;ITGB5;MMP3;VIM;LOXL1;FBLN5;COL12A1;ELN;CDH11;COMP;SPOCK1;BMP1;IL32;LAMA3;TIMP1;QSOX1;TIMP3;VCAM1;CYR61;EDIL3;CALD1;MAGEE1;FBLN1;SGCB;ECM1;LAMA…
HALLMARK_MYOGENESIS	http://www.broadinstitute.org/gsea/msigdb/cards/HALLMARK_MYOGENESIS	197	0.691666	1.93192	0	0	ACTA1;TNNI2;MYL1;TNNC1;TNNC2;MYH3;MYLPF;TNNT3;TNNT2;CASQ2;ACTC1;MYOM1;MYL4;MYBPH;MYH7;MYH8;ACTN2;TNNI1;CRYAB;SGCG;HRC;TNNT1;DES;MYOZ1;RYR1;CSRP3;ADAM12;ATP2A1;CKM;SVIL;MYOM2;MYL6B;TPM2;MYL2;CKMT2;BIN1;MYH1;ENO3;FLII;FXYD1;TPM3;DMD;IGFBP3;CHRNB1;SPEG;FHL1;ACTN3;TCAP;MYLK;MYL3;PYGM;LDB3;COX6A2;FABP3;MYL7;ITGB5;CHRNA1;SSPN;COL3A1;KCNH1;GJA5;MYF6;MYH2;MAPK12;PGAM2;MYOG;MYH4;AEBP1;HBEGF;MEF2C;NOS1;CNN…
HALLMARK_UV_RESPONSE_DN	http://www.broadinstitute.org/gsea/msigdb/cards/HALLMARK_UV_RESPONSE_DN	138	0.703598	1.92948	0	0	TJP1;NFIB;TGFBR3;TFPI;MMP16;ABCC1;MAP2K5;AGGF1;PLCB4;MET;IRS1;PTPRM;AKT3;SIPA1L1;NR1D2;ATRN;ANXA2;ADD3;CDKN1B;ATXN1;CAP2;PRDM2;FAM179B;SDC2;SMAD3;SLC7A1;GCNT1;RUNX1;RND3;PPAP2B;NR3C1;YTHDC1;PPARG;LPHN2;DLG1;ATP2B4;NIPBL;PEX14;MYC;RASA2;FZD2;BMPR1A;LPAR1;PRKCA;MGMT;PRKCE;RXRA;LTBP1;LDLR;RBPMS;CACNA1A;RGS4;COL5A2;PTPN21;PRKAR2B;GJA1;BCKDHB;ATP5S;SERPINE1;AMPH;MIOS;CITED2;COL1A2;INSIG1;FYN;WDR37;ZMI…
HALLMARK_HEDGEHOG_SIGNALING	http://www.broadinstitute.org/gsea/msigdb/cards/HALLMARK_HEDGEHOG_SIGNALING	35	0.712932	1.7901	0	0.000185	SHH;PTCH1;NRCAM;NRP1;SCG2;AMOT;UNC5C;GPR56;HEY1;GLI1;THY1;SLIT1;CDK6;HEY2;NRP2;TLE3;TLE1;L1CAM;PLG;NKX6-1;NF1;RASA1;ETS2;RTN1;CRMP1;MYH9;VEGFA;CELSR1;CNTFR;ACHE;PML;CDK5R1;VLDLR;OPHN1;LDB1;DPYSL2
HALLMARK_APICAL_JUNCTION	http://www.broadinstitute.org/gsea/msigdb/cards/HALLMARK_APICAL_JUNCTION	193	0.629638	1.73841	0	0.000148	ACTN1;CLDN7;ACTN3;CLDN19;DLG1;TJP1;COL17A1;PVRL1;CLDN9;CDH3;CTNND1;CDH1;LIMA1;VCL;SHROOM2;PVRL3;PVRL2;CLDN14;PTPRC;THY1;VASP;ITGB1;ZYX;ACTN4;CLDN4;CADM3;ITGA3;NF2;B4GALT1;NEXN;CDH6;ADAM15;PTK2;HADH;LAMB3;CLDN11;CDH4;IRS1;SORBS3;CLDN8;EVL;CLDN15;THBS3;PVRL4;JAM3;CDH11;ITGB4;RASA1;AKT2;TMEM8B;LAMA3;RSU1;ICAM1;CLDN18;GTF2F1;TSC1;LAMC2;NRAP;CTNNA1;CD99;FSCN1;COL16A1;GNAI2;TGFBI;MPP5;JUP;ACTN2;INSIG1;…
HALLMARK_COAGULATION	http://www.broadinstitute.org/gsea/msigdb/cards/HALLMARK_COAGULATION	136	0.609554	1.66029	0	0.000622	F2;PROC;C1S;MMP14;F10;PLG;C1R;SERPINE1;SERPING1;C2;F12;CFI;MMP2;C3;F9;CTSO;TMPRSS6;MMP9;PROZ;MMP1;CFB;BMP1;VWF;FGA;F11;THBD;FURIN;MMP11;F8;LGMN;HPN;CTSB;MBL2;F13B;TIMP1;CTSL2;MMP8;A2M;MMP10;MASP2;FGG;C8A;PLAU;ADAM9;GSN;CAPN2;PLAT;FN1;CTSH;OLR1;SPARC;RGN;C8B;LAMP2;C9;PROS1;CLU;F2RL2;CD9;CFH;PREP;LTA4H;GP9;DUSP14;CTSK;GDA;CASP9;APOC1;CRIP2;KLK8;SERPINC1;ANXA1;ITIH1;PRSS23;FBN1;MST1;F3;KLF7;CTSE;ITG…
HALLMARK_TGF_BETA_SIGNALING	http://www.broadinstitute.org/gsea/msigdb/cards/HALLMARK_TGF_BETA_SIGNALING	54	0.639686	1.64385	0	0.000639	TGFBR1;SMAD7;TGFB1;SMURF2;SMURF1;BMPR2;SKIL;SKI;ACVR1;PMEPA1;NCOR2;SERPINE1;JUNB;SMAD1;SMAD6;PPP1R15A;TGIF1;FURIN;SMAD3;FKBP1A;MAP3K7;BMPR1A;CTNNB1;HIPK2;KLF10;BMP2;ENG;APC;PPM1A;XIAP;CDH1;ID1;LEFTY2;CDKN1C;TRIM33;RAB31;TJP1;SLC20A1;CDK9;ID3;NOG;ARID4B;IFNGR2;ID2;PPP1CA;SPTBN1;WWTR1;BCAR3;THBS1;FNTA;HDAC1;UBE2D3;LTBP2;RHOA
HALLMARK_ANGIOGENESIS	http://www.broadinstitute.org/gsea/msigdb/cards/HALLMARK_ANGIOGENESIS	36	0.648867	1.62373	0.00426894	0.000746	VCAN;POSTN;FSTL1;LRPAP1;STC1;LPL;VEGFA;PF4;THBD;FGFR1;TNFRSF21;CCND2;COL5A2;ITGAV;SERPINA5;KCNJ8;APP;JAG1;COL3A1;SPP1;NRP1;OLR1;PDGFA;PTK2;SLCO2A1;PGLYRP1;VAV2;S100A4;MSX1;VTN;TIMP1;APOH;PRG2;JAG2;LUM;CXCL6
HALLMARK_IL6_JAK_STAT3_SIGNALING	http://www.broadinstitute.org/gsea/msigdb/cards/HALLMARK_IL6_JAK_STAT3_SIGNALING	87	0.579967	1.55397	0	0.00174184	IL4R;IL6ST;STAT1;IL1R1;CSF2RB;SOCS3;STAT3;OSMR;IL2RG;IFNGR1;TYK2;IL13RA1;TLR2;IFNGR2;IL10RB;IL6;IL1R2;IL3RA;IFNAR1;TNFRSF1A;MYD88;ACVR1B;CSF3R;ITGB3;REG1A;CXCL1;A2M;CSF2RA;IL15RA;IRF9;PDGFC;HAX1;BAK1;EBI3;INHBE;CRLF2;TNFRSF1B;CD14;PTPN1;PTPN2;IL1B;CSF1;IL18R1;TNF;PF4;CXCL13;LTBR;FAS;IL17RA;CXCL10;IL9R;STAM2;TNFRSF12A;STAT2;HMOX1;LEPR;CBL;CD9;CXCL3;TGFB1;MAP3K8;ITGA4;CD38;JUN;SOCS1;ACVRL1;PIM1;TNF…
HALLMARK_INFLAMMATORY_RESPONSE	http://www.broadinstitute.org/gsea/msigdb/cards/HALLMARK_INFLAMMATORY_RESPONSE	196	0.551554	1.51207	0	0.00388299	CXCL10;CCL2;CCL5;FPR1;CCL20;IL1A;IL8;CCL7;CCL22;CXCL11;CCR7;EDN1;CD40;CXCL9;IL6;IL1B;TLR2;IL1R1;CD69;ICAM1;CCRL2;AQP9;EREG;C3AR1;GNA15;CMKLR1;PTGER4;LIF;IL15;NAMPT;OPRK1;ITGB8;PTAFR;ADM;PLAUR;NFKB1;INHBA;OSM;TNFSF10;TNFSF15;IFNGR2;EMR1;IL12B;CSF1;CXCL6;TNFRSF9;LYN;ACVR2A;LDLR;BDKRB1;HRH1;F3;BST2;PTGIR;CD55;CALCRL;CSF3;GPR132;IL4R;NLRP3;IL15RA;ADORA2B;GCH1;OLR1;PTGER2;CSF3R;MYC;RELA;TNFAIP6;IL7R;I…
HALLMARK_IL2_STAT5_SIGNALING	http://www.broadinstitute.org/gsea/msigdb/cards/HALLMARK_IL2_STAT5_SIGNALING	193	0.541879	1.49477	0	0.00502246	SOCS2;CISH;PIM1;IL2RA;TNFRSF4;SOCS1;TNFRSF9;XBP1;RRAGD;HK2;PHLDA1;IL2RB;CTLA4;NFIL3;CD83;IKZF2;IL10;TNFRSF18;DHRS3;ECM1;ADAM19;SLC2A3;HIPK2;BATF3;BHLHE40;PTGER2;DENND5A;ITIH5;PHTF2;GADD45B;NRP1;NCOA3;CD79B;AHR;TNFRSF1B;NDRG1;BCL2L1;GABARAPL1;LIF;TIAM1;BMPR2;MAP3K8;RHOB;MYC;S100A1;METTL20;CAPG;ST3GAL4;PENK;IRF4;CST7;WLS;TLR7;IKZF4;GBP4;RGS16;SPP1;IL13;SLC29A2;NFKBIZ;IL4R;MXD1;CSF2;FAH;CTSZ;ITGAE;M…
HALLMARK_KRAS_SIGNALING_UP	http://www.broadinstitute.org/gsea/msigdb/cards/HALLMARK_KRAS_SIGNALING_UP	193	0.539043	1.48913	0	0.00504587	ANGPTL4;ITGA2;SPRY2;HBEGF;RBP4;HSD11B1;ETV4;GLRX;DUSP6;SCG5;ETV5;ITGB2;AKT2;PPBP;G0S2;GABRA3;IRF8;BIRC3;FGF9;DCBLD2;INHBA;TFPI;TSPAN1;ADAM8;SLPI;PRKG2;MMP11;MMP10;TMEM158;TNFAIP3;PRDM1;GALNT3;ETS1;MMP9;WNT7A;IGFBP3;SPP1;ETV1;CLEC4A;CCND2;TSPAN7;ITGBL1;EMP1;CDADC1;KIF5C;TRIB2;SDCCAG8;PCP4;CFHR2;ALDH1A2;NR0B2;ALDH1A3;AMMECR1;SATB1;GUCY1A3;CSF2;APOD;TOR1AIP2;CMKLR1;TMEM176B;GPR124;LAPTM5;CD37;CAB39L…
HALLMARK_WNT_BETA_CATENIN_SIGNALING	http://www.broadinstitute.org/gsea/msigdb/cards/HALLMARK_WNT_BETA_CATENIN_SIGNALING	42	0.587394	1.48138	0.0115789	0.00551621	MYC;CTNNB1;JAG2;NOTCH1;DLL1;AXIN2;PSEN2;FZD1;NOTCH4;LEF1;AXIN1;NKD1;WNT5B;CUL1;JAG1;MAML1;KAT2A;GNAI1;WNT6;PTCH1;NCOR2;DKK4;HDAC2;DKK1;TCF7;WNT1;NUMB;ADAM17;DVL2;PPARD;NCSTN;HDAC5;CCND2;FRAT1;CSNK1E;RBPJ;FZD8;TP53;SKP2;HEY2;HEY1;HDAC11
HALLMARK_NOTCH_SIGNALING	http://www.broadinstitute.org/gsea/msigdb/cards/HALLMARK_NOTCH_SIGNALING	32	0.599619	1.46915	0.0263158	0.00634771	JAG1;NOTCH3;NOTCH2;APH1A;HES1;CCND1;FZD1;PSEN2;FZD7;DTX1;DLL1;FZD5;MAML2;NOTCH1;PSENEN;WNT5A;CUL1;WNT2;DTX4;SAP30;PPARD;KAT2A;HEYL;SKP1;RBX1;TCF7L2;ARRB1;LFNG;PRKCA;DTX2;ST3GAL6;FBXW11
HALLMARK_HYPOXIA	http://www.broadinstitute.org/gsea/msigdb/cards/HALLMARK_HYPOXIA	190	0.522714	1.44551	0	0.0085173	PGK1;PDK1;GBE1;PFKL;ALDOA;ENO2;PGM1;NDRG1;HK2;ALDOC;GPI;MXI1;SLC2A1;P4HA1;ADM;P4HA2;ENO1;PFKP;AK4;FAM162A;PFKFB3;VEGFA;BNIP3L;TPI1;ERO1L;KDM3A;CCNG2;LDHA;GYS1;GAPDH;BHLHE40;ANGPTL4;JUN;SERPINE1;LOX;GCK;PPFIA4;MAFF;DDIT4;SLC2A3;IGFBP3;NFIL3;FOS;RBPJ;HK1;CITED2;ISG20;GALK1;WSB1;PYGM;STC1;ZNF292;BTG1;PLIN2;CSRP2;VLDLR;JMJD6;EXT1;F3;PDK3;ANKZF1;UGP2;ALDOB;STC2;ERRFI1;ENO3;PNRC1;HMOX1;PGF;GAPDHS;CHST2…
HALLMARK_TNFA_SIGNALING_VIA_NFKB	http://www.broadinstitute.org/gsea/msigdb/cards/HALLMARK_TNFA_SIGNALING_VIA_NFKB	197	0.521556	1.43872	0	0.00910444	JUNB;CXCL2;ATF3;NFKBIA;TNFAIP3;PTGS2;CXCL1;IER3;CD83;CCL20;CXCL3;MAFF;NFKB2;TNFAIP2;HBEGF;KLF6;BIRC3;PLAUR;ZFP36;ICAM1;JUN;EGR3;IL1B;BCL2A1;PPP1R15A;ZC3H12A;SOD2;NR4A2;IL1A;RELB;TRAF1;BTG2;DUSP1;MAP3K8;ETS2;F3;SDC4;EGR1;IL6;TNF;KDM6B;NFKB1;LIF;PTX3;FOSL1;NR4A1;JAG1;CCL4;GCH1;CCL2;RCAN1;DUSP2;EHD1;IER2;REL;CFLAR;RIPK2;NFKBIE;NR4A3;PHLDA1;IER5;TNFSF9;GEM;GADD45A;CXCL10;PLK2;BHLHE40;EGR2;SOCS3;SLC2A…
HALLMARK_APICAL_SURFACE	http://www.broadinstitute.org/gsea/msigdb/cards/HALLMARK_APICAL_SURFACE	43	0.549296	1.41363	0.0272823	0.0121416	B4GALT1;RHCG;MAL;LYPD3;PKHD1;ATP6V0A4;AIM1;SHROOM2;SRPX;MDGA1;TMEM8B;THY1;PCSK9;EPHB4;DCBLD2;GHRL;LYN;GAS1;FLOT2;PLAUR;AKAP7;ATP8B1;EFNA5;SLC34A3;APP;GSTM3;HSPB1;SLC2A4;IL2RB;RTN4RL1;NCOA6;SULF2;ADAM10;BRCA1;GATA3;AFAP1L2;IL2RG;CD160;ADIPOR2;SLC22A12;NTNG1;SCUBE1;CX3CL1;CROCC
HALLMARK_ALLOGRAFT_REJECTION	http://www.broadinstitute.org/gsea/msigdb/cards/HALLMARK_ALLOGRAFT_REJECTION	195	0.501195	1.3904	0.003	0.0162143	PTPRC;IL12B;TGFB1;IL12A;CD3E;CD3D;CD28;LYN;HCLS1;IL18;CRTAM;IFNG;CD3G;CD86;IL10;UBE2N;BCL10;CD4;LCK;NCK1;C2;HLA-A;ITGB2;HLA-DQA1;CD1D;CD80;HLA-DRA;THY1;TLR1;HLA-G;HLA-DMB;IL7;IL4;TNF;CD247;IL2;HLA-DMA;STAT1;IRF4;SRGN;INHBA;TLR3;ZAP70;CD74;CD40;TRAF2;B2M;BCL3;LTB;IFNGR1;CCR5;CD40LG;HLA-DOA;GLMN;IL6;HLA-E;CD2;CCL5;FAS;FASLG;TLR6;PF4;TGFB2;CD79A;INHBB;ELANE;SPI1;MAP3K7;IL15;CTSS;CD47;PRF1;IL12RB1;LC…
HALLMARK_APOPTOSIS	http://www.broadinstitute.org/gsea/msigdb/cards/HALLMARK_APOPTOSIS	158	0.496077	1.36615	0	0.0212738	CASP3;CASP9;DFFA;CASP7;CFLAR;BIRC3;PMAIP1;CASP8;JUN;BCL2L11;MCL1;IL1B;SPTAN1;DIABLO;BAX;BIK;IL1A;BID;CDKN1A;GADD45A;DDIT3;CDKN1B;TNF;GSN;TNFSF10;CASP6;SQSTM1;FASLG;EGR3;CD44;FAS;IL18;IGFBP6;PRF1;DAP;CCND1;BTG3;F2R;SATB1;BNIP3L;CASP4;TNFRSF12A;CREBBP;RHOB;GPX3;PDGFRB;TSPO;CCND2;XIAP;TIMP1;CTNNB1;IRF1;HSPB1;ADD1;TIMP2;BTG2;TIMP3;LEF1;CASP1;GPX1;BCL10;IGF2R;CDC25B;AIFM3;CD38;PPP3R1;HGF;CLU;ATF3;LGAL…
HALLMARK_COMPLEMENT	http://www.broadinstitute.org/gsea/msigdb/cards/HALLMARK_COMPLEMENT	195	0.491309	1.36568	0.002	0.0202471	C2;C1S;CFB;C1R;SERPINE1;MMP14;SERPING1;CTSL1;F5;MMP13;F7;CTSS;LGMN;PLG;C1QA;CASP1;GZMA;ADAM9;CALM3;C1QC;TIMP1;DPP4;KLK1;KLKB1;CD59;CR2;MMP15;LAP3;SPOCK2;F10;CTSB;SERPINA1;CTSO;CD40LG;CBLB;PDP1;C4BPB;PLEK;GP9;PLAUR;C3;F2;CASP4;STX4;CTSC;USP15;CR1;DUSP6;SERPINB2;GPD2;CFH;FN1;CD36;CA2;PSMB9;APOBEC3G;FCN1;GZMK;PDGFB;CLU;CASP10;LRP1;CTSD;S100A9;WAS;BRPF3;PLAT;CDA;MT3;CASP7;PRSS36;PFN1;GZMB;RNF4;ZEB1;C…
HALLMARK_HEME_METABOLISM	http://www.broadinstitute.org/gsea/msigdb/cards/HALLMARK_HEME_METABOLISM	190	0.469845	1.29241	0.00400802	0.0517608	ALAS2;PPOX;FECH;HMBS;GYPB;ALAD;RHD;GYPA;SELENBP1;BLVRB;GYPE;GYPC;EPB42;SLC4A1;RHCE;RHAG;TAL1;MARCH8;SPTB;UROD;HBQ1;DCAF11;ERMAP;EIF2AK1;CPOX;MPP1;GLRX5;TSPAN5;OSBP2;ANK1;NFE2;AHSP;SPTA1;MAP2K3;BNIP3L;SLC22A4;CLIC2;TRAK2;GCLC;KEL;RANBP10;TRIM10;TSPO2;UROS;XK;SNCA;MARK3;UBAC1;CA1;CA2;BSG;FOXO3;KLF1;CDC27;KAT2B;NARF;GCLM;FBXO7;H1F0;HEBP1;HBD;NUDT4;FBXO9;RAD23A;CROCCP2;TMCC2;BLVRA;GATA1;RBM38;PRDX2;R…
HALLMARK_INTERFERON_GAMMA_RESPONSE	http://www.broadinstitute.org/gsea/msigdb/cards/HALLMARK_INTERFERON_GAMMA_RESPONSE	196	0.44801	1.24258	0.022	0.0947029	STAT1;ISG15;IFIT1;MX1;IFIT3;IFI35;IRF7;IFIT2;OAS2;TAP1;EIF2AK2;RSAD2;MX2;IRF1;OAS3;TNFSF10;IRF9;CXCL10;IFI44;BST2;XAF1;SP110;OASL;PSMB8;IFI44L;IFITM3;DDX60;LGALS3BP;GBP4;IRF8;PSMB9;PML;IFIH1;UBE2L6;IFI27;ADAR;LY6E;STAT2;CXCL9;IL10RA;PLA2G4A;TRIM21;USP18;PTGS2;EPSTI1;C1S;DDX58;IL15;NLRC5;NMI;IDO1;PSMB10;CXCL11;ITGB7;SAMHD1;HERC6;CMPK2;SAMD9L;RTP4;PTPN2;PARP14;TNFAIP2;IFITM2;PLSCR1;SOCS1;CASP1;ICAM…
HALLMARK_PI3K_AKT_MTOR_SIGNALING	http://www.broadinstitute.org/gsea/msigdb/cards/HALLMARK_PI3K_AKT_MTOR_SIGNALING	104	0.438859	1.18681	0.125628	0.172915	MAPK8;PIK3R3;GRB2;NFKBIB;MAP2K6;MAPK9;AKT1;MAPK1;PLCG1;TRIB3;GSK3B;MAP2K3;CDKN1A;RAC1;RIPK1;AKT1S1;ACTR2;PRKAR2A;YWHAB;HRAS;PDK1;PIKFYVE;TBK1;ACTR3;E2F1;MYD88;ITPR2;SQSTM1;RPS6KA1;PTPN11;MAPKAP1;PLCB1;RAF1;CAMK4;RPTOR;CFL1;CDK4;TRAF2;GNGT1;UBE2N;ADCY2;CDKN1B;VAV3;FGF6;ECSIT;RALB;ARF1;MKNK1;CDK1;PTEN;ARHGDIA;ADRBK1;FGF17;DDIT3;IRAK4;TIAM1;CDK2;SFN;PRKCB;GNA14;EIF4E;CLTC;TSC2;FGF22;PPP1CA;DUSP3;HSP…
HALLMARK_BILE_ACID_METABOLISM	http://www.broadinstitute.org/gsea/msigdb/cards/HALLMARK_BILE_ACID_METABOLISM	112	0.435565	1.18068	0.140562	0.176697	SCP2;ABCD3;SLC27A2;HSD3B7;HSD17B4;AKR1D1;ABCD2;PEX1;CYP8B1;PNPLA8;PHYH;SLC27A5;CYP7B1;CYP27A1;PEX26;AGXT;PEX7;CROT;CYP39A1;ABCA3;CYP7A1;HACL1;PIPOX;PEX6;SOD1;GNPAT;HSD3B1;ABCA2;HAO1;PEX16;ABCD1;ACSL1;MLYCD;ABCG8;AQP9;ISOC1;NR1H4;PEX19;NPC1;HSD17B11;AMACR;CYP46A1;PEX13;IDH1;PEX11A;HSD17B6;EPHX2;PRDX5;PXMP2;BBOX1;FADS2;ALDH9A1;APOA1;OPTN;GSTK1;ABCG4;ALDH8A1;NR3C2;ABCA6;RETSAT;FADS1;PECR;PEX12;CAT;G…
HALLMARK_KRAS_SIGNALING_DN	http://www.broadinstitute.org/gsea/msigdb/cards/HALLMARK_KRAS_SIGNALING_DN	188	0.424284	1.17368	0.09	0.183517	CDH16;SPTBN2;FGFR3;NOS1;PDE6B;SIDT1;NTF3;SCN10A;TAS2R4;DTNB;HTR1D;MAST3;SLC6A3;CLDN8;TGM1;PCDHB1;THRB;YPEL1;RYR2;GDNF;CAMK1D;AMBN;LFNG;SERPINA10;ALOX12B;CALCB;FGGY;SPRR3;ATP6V1B1;EDN1;UPK3B;GAMT;PRODH;RYR1;GPR19;SLC29A3;EDN2;GPRC5C;C5;FAM164C;EDAR;KCNMB1;FAM46C;STAG3;KRT4;SLC25A23;INSL5;GP1BA;MLL2;ABCG4;MYH7;BRDT;PTGFR;KCNN1;SEPP1;IFI44L;PROP1;LGALS7;BMPR1B;PDK2;DCC;SNCB;COL2A1;UGT2B17;PPYR1;DLK2…
HALLMARK_MITOTIC_SPINDLE	http://www.broadinstitute.org/gsea/msigdb/cards/HALLMARK_MITOTIC_SPINDLE	197	0.409486	1.1322	0.16	0.273347	ARHGEF2;CLASP1;KIF11;KIF23;ALS2;ARF6;MYO9B;MYH9;TUBGCP3;CKAP5;RACGAP1;PREX1;ARHGEF3;NUMA1;SPTBN1;KIF2C;KIF5B;TTK;APC;CEP250;PAFAH1B1;CDC42EP2;KIF3B;CCDC88A;KIF15;BIRC5;CNTROB;NF1;TSC1;CDC27;CNTRL;TUBGCP5;KIF4A;MAPRE1;FGD6;BRCA2;PLK1;RASA1;NEK2;WASF1;TOP2A;TRIO;ARHGEF11;KATNB1;PRC1;ANLN;CDK5RAP2;SMC3;TUBGCP2;ESPL1;MAP1S;ARHGAP27;DOCK4;SAC3D1;INCENP;ARHGAP5;GSN;NET1;LRPPRC;RABGAP1;FLNB;ARAP3;FGD4;A…
HALLMARK_PANCREAS_BETA_CELLS	http://www.broadinstitute.org/gsea/msigdb/cards/HALLMARK_PANCREAS_BETA_CELLS	40	0.441024	1.10325	0.322785	0.344441	PAX6;NEUROD1;ISL1;NKX2-2;PCSK1;NKX6-1;SLC2A2;SEC11A;DCX;SPCS1;FOXA2;GCK;MAFB;INS;PDX1;ABCC8;IAPP;SRP9;NEUROG3;FOXO1;AKT3;GCG;DPP4;PAX4;SYT13;SCGN;HNF1A;STXBP1;CHGA;VDR;PCSK2;INSM1;SST;ELP4;SRPRB;PAK3;G6PC2;PKLR;LMO2;SRP14
HALLMARK_ESTROGEN_RESPONSE_EARLY	http://www.broadinstitute.org/gsea/msigdb/cards/HALLMARK_ESTROGEN_RESPONSE_EARLY	194	0.391215	1.07998	0.273273	0.404409	GREB1;CA12;SLC9A3R1;MYB;ANXA9;IGFBP4;SYBU;NPY1R;PDZK1;NRIP1;MLPH;HSPB8;EGR3;KRT19;LRIG1;KDM4B;PGR;RHOBTB3;TPD52L1;ELOVL2;RET;TPBG;TFF1;MAPT;SCNN1A;ABAT;FLNB;XBP1;CELSR2;RAB31;MYBL1;MREG;FAM102A;MSMB;STC2;FAM134B;SIAH2;ZNF185;SLC19A2;SLC1A4;FHL2;BCL2;PMAIP1;AREG;OVOL2;TSKU;ADCY9;RASGRP1;MUC1;KAZN;SLC27A2;FKBP4;CXCL12;TMPRSS3;RARA;IL17RB;CBFA2T3;TFF3;UGCG;CCND1;SLC22A5;WFS1;PTGES;WWC1;WISP2;MYC;ITP…
HALLMARK_ANDROGEN_RESPONSE	http://www.broadinstitute.org/gsea/msigdb/cards/HALLMARK_ANDROGEN_RESPONSE	96	0.378399	1.01714	0.479355	0.596012	KLK3;KLK2;ACSL3;PIAS1;CAMKK2;NKX3-1;TMPRSS2;APPBP2;CENPN;BMPR1B;MAF;FADS1;ZBTB10;HMGCR;SPCS3;INSIG1;NGLY1;UBE2J1;ELK4;ABCC4;ELOVL5;ALDH1A3;TARP;AZGP1;ABHD2;SAT1;DBI;DHCR24;SORD;STK39;TPD52;IDI1;B2M;MAP7;DNAJB9;FKBP5;HERC3;PGM3;HOMER2;ELL2;UAP1;SEC24D;LMAN1;PMEPA1;INPP4B;RRP12;SEPP1;NDRG1;KRT19;ITGAV;B4GALT1;MAK;SPDEF;GSR;KRT8;LIFR;PPAP2A;STEAP4;GUCY1A3;SRP19;CCND3;IQGAP2;RAB4A;SLC26A2;SMS;ZMIZ1;S…
HALLMARK_ADIPOGENESIS	http://www.broadinstitute.org/gsea/msigdb/cards/HALLMARK_ADIPOGENESIS	189	0.362518	1.0062	0.491	0.612153	FABP4;ADIPOQ;PPARG;LIPE;DGAT1;LPL;CPT2;CD36;GPAM;ADIPOR2;ACAA2;ETFB;ACOX1;ACADM;HADH;IDH1;SORBS1;ACADS;UCK1;SCP2;DECR1;CDKN2C;TALDO1;TST;MCCC1;PGM1;REEP5;BCL2L13;SLC25A10;ME1;PHYH;PIM3;YWHAG;NDUFAB1;GPD2;ADIG;ECHS1;QDPR;CS;ECH1;SLC25A1;ACADL;TOB1;GRPEL1;CRAT;GBE1;SDPR;SCARB1;PEMT;CHCHD10;AK2;APOE;UQCR10;TANK;ANGPTL4;ACO2;FAH;ACLY;IFNGR1;SLC5A6;JAGN1;EPHX2;IDH3G;GPX3;ELMOD3;ORM1;RETSAT;ESRRA;HIBCH…
HALLMARK_UV_RESPONSE_UP	http://www.broadinstitute.org/gsea/msigdb/cards/HALLMARK_UV_RESPONSE_UP	152	0.356472	0.971703	0.5996	0.700566	NXF1;SLC6A8;BAK1;CDC5L;HSPA2;POLR2H;ALAS1;TUBA4A;C4BPB;CCNE1;EPHX1;GRPEL1;ICAM1;FEN1;ARRB2;JUNB;CTSL2;DGAT1;ATF3;CASP3;RASGRP1;TMBIM6;FOS;TAP1;E2F5;RAB27A;CCND3;SLC25A4;SPR;CDKN2B;SHOX2;OLFM1;IGFBP2;LYN;CLTB;BCL2L11;LHX2;NFKBIA;MSX1;H2AFX;NR4A1;GLS;CDC34;MMP14;STK25;PDAP1;ABCB1;BSG;SEPW1;IRF1;RXRB;TFRC;PPIF;CDKN1C;HLA-F;CREG1;APOM;BMP2;TGFBRAP1;NAT1;CYB5R1;RRAD;POLE3;IL6;YKT6;ACAA1;CLCN2;EIF2C2;S…
HALLMARK_P53_PATHWAY	http://www.broadinstitute.org/gsea/msigdb/cards/HALLMARK_P53_PATHWAY	192	0.31927	0.883875	0.819	0.902901	CDKN1A;BTG2;MDM2;CCNG1;FAS;TOB1;GADD45A;PHLDA3;TAP1;CDKN2B;SFN;ZMAT3;DDB2;EI24;PERP;DDIT4;ATF3;BAX;SESN1;FDXR;PIDD;SAT1;CDKN2A;AEN;PPM1D;FOXO3;BTG1;TXNIP;SLC19A2;IER3;TP53;NOTCH1;RRAD;DCXR;NINJ1;FOS;S100A10;FBXW7;PLK3;XPC;AK1;TRIAP1;BAK1;CCND2;APAF1;PDGFA;NDRG1;RALGDS;SERPINB5;DGKA;CYFIP2;KLF4;IP6K2;ADA;TNFSF9;KLK8;PRKAB1;STOM;SOCS1;PLK2;CASP1;RCHY1;PCNA;RPS27L;RB1;PPP1R15A;POLH;RAB40C;ERCC5;CDH1…
HALLMARK_PROTEIN_SECRETION	http://www.broadinstitute.org/gsea/msigdb/cards/HALLMARK_PROTEIN_SECRETION	95	0.31714	0.849359	0.800604	0.937311	ARCN1;TMED10;COPB2;RAB14;ATP7A;COPB1;LAMP2;EGFR;IGF2R;COPE;PPT1;AP3S1;BET1;CLCN3;AP2S1;CLTC;AP2M1;RER1;KIF1B;ARF1;OCRL;ICA1;MON2;ARFGEF2;TMED2;NAPG;TMX1;PAM;SCAMP1;SH3GL2;RAB2A;COG2;VAMP3;ERGIC3;DOPEY1;VAMP4;VPS4B;NAPA;GNAS;STX7;SEC22B;VPS45;STX16;YKT6;SNX2;ARFGEF1;CLTA;CLN5;M6PR;SGMS1;USO1;TSG101;DNM1L;LMAN1;YIPF6;ARFIP1;ANP32E;TSPAN8;DST;SCRN1;SEC31A;VAMP7;SCAMP3;AP2B1;RAB22A;AP3B1;TPD52;ATP6V1…
HALLMARK_XENOBIOTIC_METABOLISM	http://www.broadinstitute.org/gsea/msigdb/cards/HALLMARK_XENOBIOTIC_METABOLISM	196	0.299892	0.829706	0.896897	0.939916	CYP1A1;FAH;DCXR;CYP1A2;GSTA3;CYP2J2;CYP27A1;ADH1C;UGDH;ASL;NQO1;ALAS1;GSTM4;CYP2C18;PTS;CYB5A;ACOX2;EPHX1;LCAT;SLC35D1;GSS;FMO3;IDH1;AKR1C3;SLC22A1;GSTO1;ARG1;CDO1;FMO1;ALDH9A1;POR;NDRG2;UPB1;ECH1;PTGES;PDK4;AHCY;COMT;AOX1;CFB;DDAH2;HGFAC;F11;CYP26A1;MCCC2;SERPINA6;GNMT;BLVRB;HACL1;MAOA;KYNU;DHPS;SERPINE1;SLC6A12;GCH1;DHRS7;PAPSS2;ALDH2;HSD11B1;SLC35B1;KARS;CA2;LPIN2;CAT;CYP2S1;RAP1GAP;FBP1;RBP4;…
HALLMARK_INTERFERON_ALPHA_RESPONSE	http://www.broadinstitute.org/gsea/msigdb/cards/HALLMARK_INTERFERON_ALPHA_RESPONSE	92	0.275508	0.746026	0.932663	0.99322	MX1;ISG15;OAS1;IFIT3;IFI44;IFI35;IRF7;RSAD2;IFI44L;IFITM1;IFI27;IRF9;OASL;EIF2AK2;IFIT2;CXCL10;TAP1;SP110;DDX60;UBE2L6;USP18;PSMB8;IFIH1;BST2;LGALS3BP;ADAR;ISG20;GBP2;IRF1;PLSCR1;PSMB9;HERC6;SAMD9;CMPK2;IFITM3;RTP4;STAT2;SAMD9L;LY6E;IFITM2;PRIC285;CXCL11;TRIM21;PARP14;TRIM26;PARP12;NMI;RNF31;HLA-C;CASP1;TRIM14;TDRD7;DHX58;PARP9;PNPT1;TRIM25;PSME1;WARS;EPSTI1;UBA7;PSME2;B2M;TRIM5;C1S;LAP3;LAMP3;GB…
HALLMARK_REACTIVE_OXIGEN_SPECIES_PATHWAY	http://www.broadinstitute.org/gsea/msigdb/cards/HALLMARK_REACTIVE_OXIGEN_SPECIES_PATHWAY	46	0.267636	0.687448	0.919662	0.995841	GSR;PRDX2;TXNRD1;SOD1;GCLC;CAT;GPX4;MPO;PRDX1;PRDX6;GCLM;TXN;SOD2;PRDX4;SELS;PDLIM1;TXNRD2;HBXIP;G6PD;MSRA;MBP;SRXN1;NQO1;OXSR1;GLRX2;HMOX2;FES;PFKP;NDUFB4;GPX3;SCAF4;CDKN2D;MGST1;ABCC1;FTL;ATOX1;STK25;EGLN2;ERCC2;SBNO2;JUNB;PPP2R4;LSP1;NDUFA6;HHEX;GLRX;NDUFS2;PRNP;IPCEF1
HALLMARK_SPERMATOGENESIS	http://www.broadinstitute.org/gsea/msigdb/cards/HALLMARK_SPERMATOGENESIS	131	0.246807	0.677105	0.973896	0.97232	PDHA2;TSSK2;TNP1;ZPBP;DPEP3;ADAM2;ACTL7B;GAPDHS;TUBA3C;LDHC;DDX25;PRM2;TCP11;PIAS2;PAPOLB;OAZ3;PHF7;ODF1;ACRBP;YBX2;CSNK2A2;NAA11;TULP2;ADAD1;SYCP1;DDX4;MLF1;TEKT2;SPATA6;PGK2;HSPA2;ACRV1;CLPB;CRISP2;FAM164C;AKAP4;CCNA1;CCT6B;PACRG;GSG1;THEG;HSPA4L;CST8;DCC;HSPA1L;GSTM3;DNAJB8;IL13RA2;CAMK4;LPIN1;ZC3H14;COIL;PHKG2;KIF2C;RPL39L;SLC2A5;PCSK4;AURKA;MLLT10;NOS1;ART3;CCNB2;NPHP1;CLGN;MAST2;MTOR;CDKN3;…
HALLMARK_DNA_REPAIR	http://www.broadinstitute.org/gsea/msigdb/cards/HALLMARK_DNA_REPAIR	140	-0.349595	-0.01	-0.01	1	POLR2H;POLR2A;POLR2G;POLR2E;POLR2J;POLR2F;POLR2C;POLR2K;GTF2H3;POLR2D;ERCC3;DDB2;POLR1C;XPC;PCNA;POLR2I;SUPT4H1;POLD3;POLR3GL;POLR3C;GTF2B;POLR1D;NCBP2;RDBP;GTF2F1;ERCC5;LIG1;ERCC1;ERCC4;POLD4;COBRA1;RFC2;ELL;TAF10;RRM2B;SUPT5H;RPA3;SNAPC5;SSRP1;RFC3;RPA2;TCEB3;TAF12;TH1L;TAF13;TAF6;TAF9;GTF2A2;VPS37D;NME1;RNMT;ERCC2;POLE4;VPS37B;NT5C3;SNAPC4;AAAS;ZNRD1;RFC4;ITPA;POM121;BRF2;RFC5;SAC3D1;CLP1;NME4…
HALLMARK_G2M_CHECKPOINT	http://www.broadinstitute.org/gsea/msigdb/cards/HALLMARK_G2M_CHECKPOINT	190	-0.560183	-0.01	-0.01	1	AURKA;CCNA2;TOP2A;CCNB2;CENPA;BIRC5;CDC20;PLK1;TTK;PRC1;NDC80;KIF11;NUSAP1;CKS2;KIF2C;MKI67;AURKB;TPX2;SMC4;BUB1;CENPF;RACGAP1;CENPE;KIF23;UBE2C;MCM6;MCM3;PTTG1;CDK1;KIF4A;ESPL1;MAD2L1;NEK2;KIF22;HMMR;KPNA2;CDKN3;CDC25A;H2AFX;CDC25B;PLK4;CDC6;CCNF;MCM5;LMNB1;E2F3;KIF15;CHEK1;UBE2S;WHSC1;HMGB3;DBF4;TACC3;MCM2;CDKN2C;CDKN1B;FANCC;NASP;STAG1;GINS2;FBXO5;POLQ;EZH2;RAD21;STMN1;SUV39H1;PRIM2;E2F1;CHAF1…
HALLMARK_ESTROGEN_RESPONSE_LATE	http://www.broadinstitute.org/gsea/msigdb/cards/HALLMARK_ESTROGEN_RESPONSE_LATE	194	-0.305298	-0.01	-0.01	1	TFF1;SLC9A3R1;TPD52L1;PRSS23;CA12;PDZK1;ANXA9;CELSR2;TJP3;PGR;RET;MYB;TPBG;EGR3;ARL3;OLFM1;NPY1R;SCNN1A;XBP1;AREG;IL17RB;NRIP1;ASS1;TFF3;FKBP4;SLC27A2;SEMA3B;GPER;LLGL2;AGR2;KRT19;WISP2;BLVRB;FLNB;PDCD4;CALCR;IGFBP4;DNAJC12;TIAM1;TSPAN13;CXCL12;RAB31;PKP3;CYP26B1;FKBP5;SIAH2;ISG20;TMPRSS3;SERPINA3;WFS1;MAPT;PDLIM3;RBBP8;GJB3;PRLR;SLC1A4;FOS;PLA2G16;SLC7A5;SERPINA5;IMPA2;DHCR7;MYOF;CDH1;EMP2;OVOL2…
HALLMARK_E2F_TARGETS	http://www.broadinstitute.org/gsea/msigdb/cards/HALLMARK_E2F_TARGETS	194	-0.727957	-0.01	-0.01	1	AURKA;BRCA2;CCP110;CENPE;CKS2;DCLRE1B;DNMT1;DONSON;EED;GINS1;GINS4;H2AFZ;LIG1;MAD2L1;MCM2;MCM4;MCM5;MCM7;MELK;MMS22L;NAA38;NASP;NUDT21;NUP205;ORC6;PCNA;PLK4;POLE;PRIM2;RAD51AP1;RFC2;RPA2;RPA3;SUV39H1;TMPO;UBE2T;WDR90;CDK1;MCM3;TOP2A;MCM6;BIRC5;CCNB2;RRM2;HMGB2;BUB1B;RFC3;EZH2;CHEK1;SMC4;MKI67;CDC20;PLK1;KIF2C;DLGAP5;AURKB;CDC25A;TRIP13;H2AFX;HMMR;E2F8;BRCA1;MYBL2;POLD1;RACGAP1;CKS1B;KPNA2;MSH2;CD…
HALLMARK_MYC_TARGETS_V1	http://www.broadinstitute.org/gsea/msigdb/cards/HALLMARK_MYC_TARGETS_V1	193	-0.700436	-0.01	-0.01	1	PCNA;PSMD8;PSMD7;SET;SNRPA1;RAN;SRSF2;G3BP1;STARD7;NPM1;BUB3;EIF3D;XPO1;FBL;EIF4A1;CANX;NAP1L1;CBX3;CCT3;C1QBP;U2AF1;UBE2L3;SSBP1;SRSF1;TCP1;MCM2;EIF3B;PSMD14;SNRPA;PWP1;APEX1;TXNL4A;HNRNPR;PSMB2;HPRT1;MCM6;NME1;SNRPD1;EEF1B2;HSPD1;CAD;RPL18;PGK1;DDX18;RPS2;LDHA;RUVBL2;RNPS1;EIF2S1;RANBP1;MCM5;IARS;UBE2E1;MYC;AP3S1;RFC4;DUT;PSMA4;RPS3;SNRPG;PHB2;SSB;EIF4H;SRSF3;CCT4;TFDP1;EIF2S2;CDK4;SNRPD3;PSMD1…
HALLMARK_FATTY_ACID_METABOLISM	http://www.broadinstitute.org/gsea/msigdb/cards/HALLMARK_FATTY_ACID_METABOLISM	155	-0.334109	-0.01	-0.01	1	ACAA1;ACAA2;ACADL;ACADM;ACOT8;ACOX1;ACSL1;ALDH3A2;CCDC58;CPT2;CYP4A11;DECR1;ECH1;ECI1;ELOVL5;FABP1;FABP2;HADH;HIBCH;HMGCL;HSD17B11;IDH1;ME1;MGLL;MLYCD;PCBD1;RETSAT;S100A10;SUCLG1;VNN1;EHHADH;ALDH9A1;HADHB;ECHS1;ACADS;CA2;HSD17B10;ALDH1A1;ACADVL;HSD17B4;CA4;ADH1C;ADH7;PTS;MAOA;HAO2;HSD17B7;MCEE;ACAT2;AUH;HPGD;FH;HMGCS2;ALAD;GPD1;ACO2;CBR1;GRHPR;ACOT2;G0S2;MDH2;HSP90AA1;BCKDHB;UROS;YWHAH;LDHA;CRYZ;…
HALLMARK_OXIDATIVE_PHOSPHORYLATION	http://www.broadinstitute.org/gsea/msigdb/cards/HALLMARK_OXIDATIVE_PHOSPHORYLATION	183	-0.594716	-0.01	-0.01	1	NDUFS3;UQCRB;NDUFS2;SDHA;UQCRC1;NDUFA9;NDUFS4;NDUFS1;NDUFA2;NDUFS8;SDHB;NNT;ATP5O;ATP5G3;NDUFS7;ATP5A1;NDUFV1;COX5B;UQCRH;NDUFA1;ATP5C1;ATP5B;COX7B;SDHD;CYCS;NDUFA6;NDUFAB1;COX8A;ACO2;ATP5G1;CYC1;NDUFB6;ATP5E;COX5A;UQCRC2;COX6A1;ATP5D;COX6C;ATP5J;NDUFB3;IDH3B;OGDH;NDUFB8;SURF1;COX6B1;NDUFB5;NDUFA4;NDUFB1;COX4I1;COX7C;UQCRFS1;SDHC;ATP6V1F;COX7A2;SUCLG1;NDUFS6;NDUFA7;FH;NDUFV2;OXA1L;NDUFC1;UQCR11;N…
HALLMARK_GLYCOLYSIS	http://www.broadinstitute.org/gsea/msigdb/cards/HALLMARK_GLYCOLYSIS	195	-0.38013	-0.01	-0.01	1	PGK1;ALDOA;ENO1;TPI1;PFKP;ERO1L;ALDOB;VEGFA;MXI1;PKM2;HK2;LDHA;EXT1;SLC25A10;GUSB;PFKFB1;PGAM1;PYGB;AK4;P4HA1;PMM2;FAM162A;SDC1;EGLN3;PC;B4GALT7;FBP2;IGFBP3;CHPF;B3GAT3;CHST12;HS2ST1;MPI;GNPDA1;AKR1A1;PPFIA4;B3GAT1;CHPF2;G6PD;MDH2;CHST6;PGLS;PGAM2;CHST1;GPC1;TSTA3;ALG1;GFPT1;PRPS1;GOT1;MDH1;SLC35A3;GALK1;EGFR;ANGPTL4;CITED2;PLOD2;QSOX1;ME2;SPAG4;P4HA2;GAPDHS;ENO2;GOT2;EXT2;SLC25A13;HMMR;PDK3;CXCR…
HALLMARK_MYC_TARGETS_V2	http://www.broadinstitute.org/gsea/msigdb/cards/HALLMARK_MYC_TARGETS_V2	58	-0.790282	-3.33348	0	0	SLC19A1;MRTO4;TMEM97;RRP9;PES1;TFB2M;EXOSC5;IPO4;NDUFAF4;NOC4L;MYC;SRM;PA2G4;GNL3;NOLC1;WDR43;RABEPK;NOP16;TBRG4;DDX18;NIP7;WDR74;BYSL;HSPD1;PLK4;NOP2;PPAN;NOP56;RCL1;NPM1;AIMP2;RRP12;PPRC1;TCOF1;MCM5;HK2;CBX3;PLK1;PHB;MCM4;CDK4;DUSP2;MYBBP1A;UTP20;PRMT3;FARSA;MAP3K6;LAS1L;PUS1;HSPE1;SLC29A2;DCTPP1;SUPV3L1;SORD;IMP4;GRWD1;UNG;MPHOSPH10
HALLMARK_MTORC1_SIGNALING	http://www.broadinstitute.org/gsea/msigdb/cards/HALLMARK_MTORC1_SIGNALING	193	-0.525528	-2.4071	0	0	FADS1;DDIT4;CALR;HK2;PGK1;SLC7A5;CTSC;ACSL3;SLC1A5;M6PR;TFRC;DDIT3;TMEM97;IFRD1;PLOD2;TUBA4A;PSAT1;CORO1A;LDHA;MTHFD2;FADS2;VLDLR;WARS;SCD;P4HA1;ACTR2;IDH1;SLC2A1;GBE1;SERPINH1;NUPR1;PSMG1;PSPH;NAMPT;CDKN1A;BHLHE40;HSPA9;HSPA5;EGLN3;LGMN;PNP;XBP1;SLA;DDX39A;HSPE1;ACLY;SLC7A11;SSR1;GLA;SQSTM1;PDK1;PSMC2;PRDX1;SERP1;TRIB3;NFIL3;HMGCS1;GOT1;TPI1;ELOVL6;ASNS;PSMD14;PSMA4;PPA1;HPRT1;AURKA;HMGCR;GAPDH;…
HALLMARK_UNFOLDED_PROTEIN_RESPONSE	http://www.broadinstitute.org/gsea/msigdb/cards/HALLMARK_UNFOLDED_PROTEIN_RESPONSE	105	-0.344799	-1.60407	0	0.00365726	ATF4;HERPUD1;PARN;EXOSC4;HSP90B1;XBP1;EXOSC9;HSPA5;ATF3;EXOSC1;EXOSC5;ASNS;ARFGAP1;WFS1;SRPRB;DNAJB9;TSPYL2;NFYA;CALR;KHSRP;DNAJC3;EXOSC2;NOP14;ATF6;HYOU1;RRP9;NOP56;CXXC1;IGFBP1;CNOT4;DCP2;PDIA6;ATP6V0D1;PREB;SEC31A;GOSR2;SERP1;NFYB;NHP2;DCTN1;SLC7A5;SSR1;EDEM1;EDC4;EIF2AK3;MTHFD2;SRPR;NOLC1;ERN1;FKBP14;ZBTB17;WIPI1;YIF1A;CCL2;DKC1;EIF4EBP1;EIF4A1;EIF2S1;TATDN2;XPOT;LSM4;CHAC1;STC2;PDIA5;OBFC2A;…
HALLMARK_CHOLESTEROL_HOMEOSTASIS	http://www.broadinstitute.org/gsea/msigdb/cards/HALLMARK_CHOLESTEROL_HOMEOSTASIS	72	-0.368579	-1.55116	0.0526316	0.00574713	FDPS;CYP51A1;IDI1;FDFT1;DHCR7;SQLE;HMGCS1;NSDHL;LSS;MVD;LDLR;TM7SF2;ALDOC;EBP;SCD;PMVK;MVK;LPL;SC5DL;FADS2;HMGCR;HSD17B7;ANXA13;SREBF2;PCYT2;ACSS2;ATF3;ADH4;ETHE1;ECH1;CBS;GUSB;FASN;LGALS3;ATF5;ANXA5;TP53INP1;CHKA;GSTM2;ACAT2;AVPR1A;PLSCR1;CLU;ERRFI1;TRIB3;CXCL16;TNFRSF12A;ACTG1;JAG1;LGMN;FBXO6;GPX8;PNRC1;ANTXR2;MAL2;CD9;PPARG;GLDC;STX5;STARD4;CTNNB1;TMEM97;FAM129A;PDK3;PLAUR;SEMA3B;GNAI1;ABCA2;A…
HALLMARK_PEROXISOME	http://www.broadinstitute.org/gsea/msigdb/cards/HALLMARK_PEROXISOME	103	-0.317661	-1.44646	0	0.0116416	ABCD3;ACOT8;ACOX1;ACSL1;ECH1;ECI2;EHHADH;GSTK1;HSD17B4;MLYCD;PEX11A;RETSAT;SLC27A2;PEX13;PEX14;SCP2;HSD3B7;GNPAT;ABCD2;SLC25A17;PEX2;ACAA1;HAO2;HSD17B11;CRAT;PEX11B;LONP2;IDH1;FIS1;PEX6;ABCB4;SOD1;ABCB1;ISOC1;YWHAH;EPHX2;ABCD1;HMGCL;ACSL5;ALDH9A1;DHCR24;ELOVL5;NUDT19;PRDX5;CTPS;IDE;SLC23A2;PEX5;BCL10;NR1I2;TSPO;CNBP;MSH2;DHRS3;DIO1;SLC25A4;PRDX1;IDI1;HRAS;MVP;ABCC8;CLN6;CAT;ACSL4;IDH2;ABCC5;SOD2;…
