# Supplementary material for: Clinical and Biological Significances of FBLN5 in Gastric Cancer
Source: Cancers (Basel). 2023 Jan 16;15(2):553. doi: 10.3390/cancers15020553 (PMC9856449; doi:10.3390/cancers15020553)
Supplement: Supplementary file 1 [file cancers-15-00553-s001.zip › Supplementary Table S5.xlsx]

## Sheet: 整理
Characteristics	Total(N)	HR(95% CI) Univariate analysis	P value Univariate analysis	HR(95% CI) Multivariate analysis	P value Multivariate analysis
FBLN5	619	1.004 (1.001 - 1.007)	< 0.01	1.003 (0.998 - 1.007)	0.235
ELN	619	1.002 (1.000 - 1.003)	< 0.05	1.000 (0.998 - 1.003)	0.698
LOX	619	1.005 (1.001 - 1.009)	< 0.05	1.003 (0.998 - 1.008)	0.197
LOXL1	619	1.004 (0.999 - 1.009)	0.096
LOXL2	619	1.002 (0.997 - 1.006)	0.499
LOXL3	619	1.030 (0.992 - 1.069)	0.121
LOXL4	619	1.012 (0.999 - 1.025)	0.062

## Sheet: 原始
Characteristics	Total(N)	HR Univariate analysis	CI Low Univariate analysis	CI High Univariate analysis	P value Univariate analysis	HR Multivariate analysis	CI Low Multivariate analysis	CI High Multivariate analysis	P value Multivariate analysis
FBLN5	619	1.00419	1.0012	1.00718	0.0060373	1.00266379104674	0.998268886668721	1.007078044104	0.235257715103323
ELN	619	1.00178	1.00031	1.00325	0.0174509	1.00043579744105	0.998232766489039	1.00264369033061	0.698480871084194
LOX	619	1.00486	1.00097	1.00878	0.0144243	1.00300460884246	0.998440385027689	1.00758969733712	0.197318159386044
LOXL1	619	1.00423	0.999255	1.00923	0.0957323
LOXL2	619	1.00152	0.997114	1.00595	0.49897
LOXL3	619	1.02978	0.992248	1.06872	0.121356
LOXL4	619	1.01199	0.999389	1.02475	0.0622835
