# Supplementary material for: Clinical and Biological Significances of FBLN5 in Gastric Cancer
Source: Cancers (Basel). 2023 Jan 16;15(2):553. doi: 10.3390/cancers15020553 (PMC9856449; doi:10.3390/cancers15020553)
Supplement: Supplementary file 1 [file cancers-15-00553-s001.zip › Supplementary Table S6.xlsx]

## Sheet: 整理
Characteristics	Total(N)	HR(95% CI) Univariate analysis	P value Univariate analysis	HR(95% CI) Multivariate analysis	P value Multivariate analysis
RiskScore	619	2.718 (1.444 - 5.116)	< 0.01	2.226 (1.139 - 4.353)	< 0.05
pTNM stage	605		< 0.001
Stage1	81	Reference		Reference
Stage2	160	2.691 (1.395 - 5.191)	< 0.01	2.491 (1.287 - 4.823)	< 0.01
Stage3	312	4.854 (2.633 - 8.947)	< 0.001	4.645 (2.510 - 8.596)	< 0.001
Stage4	52	10.611 (5.412 - 20.806)	< 0.001	12.565 (6.368 - 24.793)	< 0.001
Gender	619		0.371
Female	221	Reference
Male	398	1.123 (0.870 - 1.449)	0.373
Age	616	1.017 (1.007 - 1.028)	< 0.01	1.025 (1.013 - 1.036)	< 0.001

## Sheet: 原始
Characteristics	Total(N)	HR Univariate analysis	CI Low Univariate analysis	CI High Univariate analysis	P value Univariate analysis	HR Multivariate analysis	CI Low Multivariate analysis	CI High Multivariate analysis	P value Multivariate analysis
RiskScore	619	2.71828182843787	1.44426959413579	5.11611968348396	0.001940010647605	2.22646452801235	1.13885037954307	4.35276168278238	0.0192792192239318
pTNM stage	605				2.45179071699336e-16
Stage1	81	Reference				Reference
Stage2	160	2.69101077886007	1.39500037319937	5.19106600332511	0.00314678864751042	2.49109751230629	1.28675912035316	4.82263285929956	0.00676871601702756
Stage3	312	4.85410571989163	2.63342798212468	8.94740334644517	4.1207081335364e-07	4.64511926879753	2.51016736326581	8.59589417706458	1.00412815968501e-06
Stage4	52	10.6111428203551	5.41183484044053	20.8055780107303	6.18625240456038e-12	12.5654161335936	6.36829524031175	24.7930845936479	2.89765942182999e-13
Gender	619				0.370543834079727
Female	221	Reference
Male	398	1.12281151928852	0.870008099258125	1.4490735303752	0.373454927201343
Age	616	1.01720116503445	1.00655969254131	1.02795514047964	0.00148044762103945	1.02482995604384	1.01330108585412	1.03648999637609	2.14621488116297e-05
