# Supplementary material for: Clinical and Biological Significances of FBLN5 in Gastric Cancer
Source: Cancers (Basel). 2023 Jan 16;15(2):553. doi: 10.3390/cancers15020553 (PMC9856449; doi:10.3390/cancers15020553)
Supplement: Supplementary file 1 [file cancers-15-00553-s001.zip › Supplementary Table S7.xlsx]

## Sheet: Sheet1
Label	Comparison group(Mean±std)	Control group(Mean±std)	Rank sum test	Rank sum test
Irinotecan	High(0.80±0.13)	Low(0.80±0.13)	0.57	0.57
5-fluorouracil	High(0.92±0.04)	Low(0.92±0.03)	0.9	0.9
Docetaxel	High(0.78±0.11)	Low(0.76±0.11)	0.41	0.41
Capecitabine	High(1.01±0.03)	Low(1.02±0.03)	0.00012	0.00012
Paclitaxel	High(0.76±0.17)	Low(0.75±0.16)	0.34	0.34
Cisplatin	High(1.00±0.05)	Low(0.99±0.06)	0.0013	0.0013
Oxaliplatin	High(0.87±0.12)	Low(0.90±0.15)	0.0066	0.0066
